# Supplementary material
Source: HighWire-hosted journal article supplement (doi:10.1101/rna.065383.117)
Supplement: Supplemental_Information.docx [file Supplemental_Information.docx]

**Supplementary Information**

**Inhibition of SF3B1 by molecules targeting the spliceosome results in massive aberrant exon skipping**

Gang Wu*, Liying Fan*, Michael N. Edmonson, Timothy Shaw, Kristy Boggs, John Easton, Michael C. Rusch, Thomas R. Webb, Jinghui Zhang and Philip M. Potter

**Supplementary figures**

**Figure S1. Chromatograms of MDM2 sequences encoding different isoforms**

A. A diagram to illustrate different MDM2 isoforms. The arrows indicate where the PCR primers were designed.

B. MDM2-A (missing exons 4-9 and exon 11).

C. MDM2-B (missing exons 4 to exon 11).

**Figure S2. Modulation of splicing of candidate genes following siRNA transfection of Rh18 cells**

RNA was isolated from cells following either exposure to sudemycin D1 (1 µM) for 8hr, or 72hr following transfection with siRNA #13 that targets SF3B1. RT/PCR was then conducted as described, using primers directed towards the different transcripts.

M – DNA molecular weight markers; C – RNA isolated from control (DMSO) treated Rh18 cells; D1 – RNA obtained from Rh18 cells exposed to sudemycin D1; 13 – RNA harvested from Rh18 cells that had been transfected with the above described siRNA.

The percentages of each transcript in the ‘13’ samples are indicated to the right of the gels.

**Figure S3. Differential gene expression in Rh18 and Hela cells mediated by SF3B1 inhibition**

A. The volcano plots of three studies: i) Rh18 cells treated with sudemycin D1 (left panel); ii) Hela cells treated with spliceostatin A (SSA, middle panel); and iii) Hela cell nuclear fraction following treatment with SSA (right panel).

B. The intersection of commonly up-regulated and down-regulated genes for the three datasets.

C. Heatmap to show the log2CPM (count per million reads) for the common differentially expressed genes for the three studies.

D. The expression (log2CPM) of HNRNPA1 and SRSF2 in the three studies.

**Figure S4. Gene set enrichment analysis for Rh18 treated with sudemycin**

A. Top enriched pathways and genesets revealed by pre-ranked GSEA (also refer to Table S2A).

B. Three examples of up-regulated post-transcriptional regulation pathways.

**Figure S5. Summary of different splicing events from rMATS analysis and sequence features**

A. RNAseq data obtained from total RNA in Hela cells treated with spliceostatin A.

B. RNAseq of nuclear fraction of Hela cells treated with spliceostatin A.

C. RNAseq data obtained from HCT-116 cells treated with the pladienolide derivative E7107.

D. The intron/exon boundary sequence motifs in skipped and preferred exons in Rh18 cells treated by sudemycin D1.

E. The distribution of reading frames observed in the skipped exon and preferred exon sequences after sudemycin treatment of Rh18 cells.

F. The range of GC composition in the skipped exon and preferred exon sequences after sudemycin treatment of Rh18 cells.

G. The density plots of the difference between the lengths of the 3’-downstream exons and the skipped exons (top panel) and the difference between the lengths of the 3’-downstream introns and 5’-upstream introns flanking the skipped exons (bottom panel). The dashed line mirrors the density plot to illustrate symmetry.

**Figure S6. Differentially expressed exon junctions in Hela cells following treatment with spliceostatin A**

The fold change in exon junctions compared with changes in gene expression induced by spliceostatin A in:

A. Total Hela cell RNA;

B. Hela cell nuclear RNA fraction;

C. Hela cell cytoplasmic RNA fraction;

D. The type of junctions present in differentially expressed exon junctions in total Hela RNAseq datasets;

E. The distribution of novel junctions in total Hela cell RNAseq datasets.

**Figure S7. Validation of an alternative 3’-splice event in SMEK1**

1. Supporting reads for the novel acceptor sites in RNAseq of Rh18 cells following sudemycin D1 treatment. Blue text indicates novel reads only seen following drug treatment, whereas red text represents the canonical sequences present in the RefSeq annotation. An 18 nucleotide deletion is identified in the former.
2. Sequence chromatograms demonstrating the loss of the 18nt fragment in RNA isolated from sudemycin-treated Rh18 cells.
3. Quantitation of the sequence reads obtained from these RNA samples.
4. RT/PCR analysis of RNA from Rh18 cells using primers specifically designed to identify the 18bp deletion. M – Molecular weight markers; C – Untreated cells. D1 – Treatment with sudemycin D1. Sizes are indicated in bp.

**Supplementary Tables**

**Table S1. Differentially expressed genes in Rh18 or Hela cells upon drug treatment.**

1. Rh18 treated with sudemycin;
2. Hela treated with spliceostatin A (total RNA)
3. Hela treated with spliceostatin A (nuclear fraction only)
4. Common up-/down regulated genes

**Table S2. Gene set enrichment analysis in Rh18 or Hela cells upon drug treatment.**

1. Rh18 treated with sudemycin;
2. Hela treated with spliceostatin A (total RNA)
3. Hela treated with spliceostatin A (nuclear fraction only)

**Table S3. Significant splicing events in Rh18 cells treated by sudemycin D1**

Only splicing events with FDR<0.05 were included.

**Table S4. Significant splicing events in Hela cells treated by spliceostatin A**

Only splicing events with FDR<0.05 were included.

**Table S5. Significant splicing events in Hela cells treated by spliceostatin A (Nuclear fraction only)**

Only splicing events with FDR<0.05 were included.

**Table S6. Differentially expressed exon junctions**

A). Rh18 cells treated with sudemycin D1;

B) Hela cell treated with spliceostatin A;

C) Summary of reading frame for skipped exons caused by up-regulated novel or core junctions. Only exon junctions demonstrating at least a 4-fold change and a FDR<0.05 were included.

**Table S7. List of primers used for RT-PCR**
