# Supplementary material
Source: HighWire-hosted journal article supplement (doi:10.1101/rna.065383.117)
Supplement: Supplemental_Table_S1_Differentially_expressed_genes.xlsx [file Supplemental_Table_S1_Differentially_expressed_genes.xlsx]

## Sheet: S1A Rh18_SudemycinD1
Table S1A Differentially expressed genes in Rh18 cells treated by sudemycin
Gene	Fold Change	log2FC	Mean_SUD	Mean_DMSO	Mean_all_samples	t	P.Value	adj.P.Val	SUD-rep1	SUD-rep2	SUD-rep3	DMSO-rep1	DMSO-rep2	DMSO-rep3
MDM2	8.16841	3.03005	13.6699	10.64	12.1549	70.4833	2.74993e-30	3.77868e-26	13.6909	13.7757	13.543	10.6817	10.595	10.6432
ZMAT3	6.23701	2.64085	9.27719	6.63638	7.95679	63.8042	3.27127e-29	2.24752e-25	9.2973	9.31591	9.21837	6.69056	6.5743	6.64428
TAF1D	5.39149	2.43068	9.70332	7.27274	8.48803	61.1769	9.30174e-29	3.28608e-25	9.66986	9.77845	9.66165	7.29935	7.24426	7.2746
SMEK1	6.1278	2.61537	9.46573	6.85048	8.15811	61.108	9.56576e-29	3.28608e-25	9.49025	9.53211	9.37484	6.89427	6.81181	6.84535
DNAJB9	7.0122	2.80987	8.45672	5.64705	7.05189	59.9878	1.51475e-28	3.90341e-25	8.46785	8.51639	8.38593	5.67777	5.55916	5.70423
HSPA5	3.83191	1.93807	11.9071	9.96909	10.9381	59.7035	1.70442e-28	3.90341e-25	11.9254	11.9112	11.8849	9.96553	9.97664	9.9651
DDIT3	9.51203	3.24975	7.4045	4.15513	5.77981	58.5236	2.79803e-28	4.80597e-25	7.45238	7.43509	7.32602	4.08796	4.25204	4.12539
FAM160B1	6.18465	2.62869	8.17066	5.54176	6.85621	57.1861	4.96757e-28	7.11048e-25	8.16018	8.1902	8.1616	5.63729	5.44722	5.54077
ZNF561	6.30625	2.65678	7.86285	5.2063	6.53458	57.0921	5.17465e-28	7.11048e-25	7.88545	7.88427	7.81884	5.21383	5.12809	5.27698
FHL2	7.72688	2.94989	7.85007	4.90088	6.37547	56.8586	5.72863e-28	7.15611e-25	7.87307	7.90869	7.76844	4.79587	4.93949	4.96726
SH3RF1	6.40735	2.67973	7.81077	5.13099	6.47088	55.468	1.05904e-27	1.21269e-24	7.81333	7.8774	7.74159	5.19958	5.0897	5.1037
ETV3	6.08589	2.60547	7.45223	4.84693	6.14958	53.8543	2.20284e-27	2.3284e-24	7.48453	7.49623	7.37592	4.86549	4.82842	4.84688
DDX39B	5.3665	2.42398	8.04023	5.61621	6.82822	53.1203	3.0957e-27	3.03843e-24	8.05873	8.03752	8.02444	5.58601	5.7198	5.54283
RND3	4.48412	2.16482	10.5242	8.35957	9.44189	52.7279	3.72038e-27	3.3527e-24	10.5256	10.5971	10.4499	8.36641	8.29239	8.4199
EPM2AIP1	5.87854	2.55546	7.3344	4.77931	6.05686	52.6224	3.90976e-27	3.3527e-24	7.35084	7.38728	7.26509	4.75976	4.77643	4.80174
ACBD3	4.42217	2.14476	8.48965	6.34491	7.41728	52.4688	4.20365e-27	3.3527e-24	8.52788	8.50113	8.43994	6.37972	6.30665	6.34837
DACT1	5.71965	2.51593	7.54639	5.03032	6.28836	52.3762	4.39186e-27	3.3527e-24	7.62448	7.47745	7.53724	5.0403	5.02432	5.02634
SRRM1	4.49809	2.16931	8.2932	6.12388	7.20854	51.8974	5.51451e-27	3.78875e-24	8.35009	8.28864	8.24087	6.13739	6.13685	6.09741
FRMD6	5.0021	2.32253	10.6668	8.34424	9.50551	51.5448	6.52946e-27	4.23599e-24	10.6707	10.713	10.6166	8.45377	8.21319	8.36577
PRPF3	4.91181	2.29625	7.52147	5.22511	6.37329	51.4353	6.88267e-27	4.23599e-24	7.54772	7.49114	7.52555	5.21216	5.27462	5.18856
RP11-473I1.10	4.92017	2.29871	7.73639	5.43785	6.58712	51.151	7.89602e-27	4.3925e-24	7.74161	7.73719	7.73037	5.36871	5.51914	5.42572
ZNF3	4.60036	2.20175	7.87047	5.66877	6.76962	51.1203	8.01445e-27	4.3925e-24	7.88184	7.9034	7.82616	5.66867	5.70959	5.62805
KITLG	6.82716	2.77129	8.31587	5.54457	6.93022	51.0453	8.31126e-27	4.3925e-24	8.31236	8.36813	8.26711	5.65153	5.36388	5.61832
FAM133B	6.20565	2.63358	6.95923	4.32576	5.6425	50.692	9.87169e-27	5.02396e-24	6.88479	7.00833	6.98456	4.32265	4.30725	4.34738
LRIG3	4.24976	2.08738	8.52294	6.43564	7.47929	50.6075	1.02881e-26	5.04888e-24	8.5609	8.55099	8.45694	6.46209	6.40634	6.43849
DNAJC3	4.0198	2.00712	8.50124	6.49404	7.49764	50.2933	1.20044e-26	5.688e-24	8.52216	8.46988	8.51168	6.52092	6.44486	6.51635
HERPUD1	3.93946	1.978	8.53155	6.55365	7.5426	49.7206	1.59415e-26	7.06622e-24	8.55543	8.56238	8.47684	6.56016	6.55027	6.55052
TP53INP1	5.44172	2.44406	7.74742	5.30331	6.52536	49.0579	2.22241e-26	9.54316e-24	7.78006	7.79881	7.66338	5.39175	5.22235	5.29582
EIF2AK3	4.86097	2.28125	7.207	4.92567	6.06633	47.9987	3.81467e-26	1.5884e-23	7.23419	7.22272	7.16409	4.98859	4.87	4.91841
NFYA	4.78277	2.25785	7.64306	5.38536	6.51421	47.9106	3.99208e-26	1.61339e-23	7.69563	7.66808	7.56546	5.41733	5.32349	5.41527
FN1	3.0096	1.58957	13.8344	12.2448	13.0396	47.8276	4.16718e-26	1.63603e-23	13.8742	13.8238	13.8052	12.3039	12.1951	12.2353
PTP4A1	3.99135	1.99688	9.14271	7.14597	8.14434	47.7393	4.36211e-26	1.66499e-23	9.16257	9.21047	9.05509	7.18189	7.12617	7.12984
USPL1	4.7712	2.25435	7.66453	5.41044	6.53748	47.5823	4.73265e-26	1.74445e-23	7.67976	7.72379	7.59003	5.43247	5.3415	5.45735
RFX7	7.46738	2.9006	6.95646	4.05586	5.50616	47.5454	4.82419e-26	1.74445e-23	6.99293	7.02825	6.8482	4.16591	3.95534	4.04631
SERPINE1	3.75125	1.90737	11.2683	9.36107	10.3147	47.4332	5.11469e-26	1.80208e-23	11.2687	11.3646	11.1716	9.37709	9.35704	9.34908
GDF15	7.57408	2.92107	8.43169	5.51101	6.97135	47.2143	5.73479e-26	1.97004e-23	8.53623	8.53066	8.22819	5.52882	5.47585	5.52835
SERPINB2	7.782	2.96014	6.30592	3.34645	4.82619	46.8462	6.95988e-26	2.33258e-23	6.30352	6.3565	6.25774	3.34491	3.23455	3.4599
TSPYL4	4.83129	2.27241	8.35007	6.07763	7.21385	46.6304	7.80179e-26	2.49312e-23	8.37312	8.42984	8.24725	6.16742	6.04478	6.02069
PCDH18	4.93738	2.30374	8.70227	6.39872	7.5505	46.4028	8.80527e-26	2.74984e-23	8.72576	8.76657	8.61449	6.45646	6.26625	6.47346
RGL1	4.71383	2.2369	7.41682	5.17967	6.29825	46.3414	9.09861e-26	2.77831e-23	7.4452	7.42825	7.37703	5.28146	5.10719	5.15036
GADD45A	8.02035	3.00366	8.40184	5.39858	6.90021	46.0938	1.03871e-25	2.87203e-23	8.48196	8.53916	8.1844	5.40277	5.41874	5.37423
F2RL2	3.54791	1.82697	8.4689	6.64202	7.55546	46.0751	1.04921e-25	2.87203e-23	8.47669	8.5074	8.42261	6.65997	6.6167	6.64939
ZNF776	4.72336	2.23981	6.85525	4.6155	5.73537	46.0464	1.06548e-25	2.87203e-23	6.84984	6.86891	6.847	4.64319	4.5474	4.6559
BCL2L1	4.39095	2.13453	8.94241	6.80819	7.8753	46.031	1.07432e-25	2.87203e-23	8.99078	9.01279	8.82368	6.7599	6.86392	6.80074
SON	3.64138	1.86449	10.0972	8.23268	9.16494	46.0116	1.08556e-25	2.87203e-23	10.1245	10.1099	10.0571	8.31757	8.14507	8.23541
PAG1	4.51269	2.17399	8.27821	6.10388	7.19105	45.9809	1.10364e-25	2.87203e-23	8.27839	8.24992	8.30631	6.22526	5.99272	6.09367
SLC30A1	6.49664	2.69969	8.02572	5.32631	6.67601	45.8884	1.15998e-25	2.90096e-23	8.0552	8.15578	7.86617	5.38362	5.24831	5.34699
RP11-473I1.9	8.56096	3.09777	6.18574	3.08731	4.63652	45.8865	1.16114e-25	2.90096e-23	6.23076	6.14214	6.18432	3.21425	2.93795	3.10973
E2F7	4.70034	2.23276	7.17017	4.93724	6.0537	45.2934	1.60161e-25	3.92995e-23	7.17832	7.20384	7.12835	5.03087	4.86243	4.91841
ZNF343	5.50541	2.46085	6.79689	4.33676	5.56682	44.9118	1.97406e-25	4.6681e-23	6.81203	6.86516	6.71347	4.26102	4.38781	4.36145
SKIL	4.4504	2.15394	7.92446	5.77043	6.84744	44.8867	2.0016e-25	4.6681e-23	7.95703	7.95651	7.85984	5.86947	5.67049	5.77133
ARSJ	3.88668	1.95854	8.97807	7.01953	7.9988	44.8842	2.00435e-25	4.6681e-23	8.99086	9.01685	8.92648	7.10639	6.92256	7.02965
DLC1	4.62784	2.21034	9.51315	7.30306	8.40811	44.6622	2.26554e-25	5.1034e-23	9.55498	9.6221	9.36238	7.34976	7.26696	7.29246
ZFP28	4.60707	2.20385	6.81698	4.61288	5.71493	44.6058	2.3374e-25	5.18035e-23	6.81482	6.84246	6.79366	4.68711	4.58862	4.56292
MIS12	4.01864	2.00671	7.34336	5.33676	6.34006	44.5634	2.39297e-25	5.21934e-23	7.3607	7.3844	7.285	5.3612	5.32585	5.32323
ELL2	3.93922	1.97791	8.31176	6.33407	7.32291	44.431	2.57548e-25	5.52963e-23	8.33864	8.37645	8.22019	6.34777	6.28659	6.36785
TGFBI	4.62419	2.2092	6.69265	4.48376	5.5882	44.3768	2.65431e-25	5.6112e-23	6.69141	6.71038	6.67615	4.42275	4.542	4.48653
ZNF24	4.26139	2.09132	8.63105	6.53977	7.58541	44.2346	2.87339e-25	5.98232e-23	8.63563	8.6971	8.56041	6.63246	6.42884	6.55801
COL6A3	3.14708	1.65402	11.8556	10.2016	11.0286	44.1902	2.94545e-25	6.04081e-23	11.9186	11.85	11.7981	10.2632	10.1456	10.1959
RPL9	5.62292	2.49132	6.5167	4.02599	5.27135	44.1124	3.07651e-25	6.21681e-23	6.53774	6.57235	6.44001	3.96251	4.09847	4.01699
SMNDC1	3.82825	1.93669	7.85138	5.91489	6.88314	44.0047	3.26799e-25	6.50804e-23	7.87613	7.90432	7.77371	5.92861	5.88583	5.93025
ZNF746	4.4838	2.16472	6.97242	4.80803	5.89023	43.809	3.64828e-25	7.16158e-23	7.02806	6.99502	6.8942	4.78693	4.82175	4.81543
EP300	3.67567	1.87801	8.66188	6.7838	7.72284	43.7217	3.83253e-25	7.4173e-23	8.68189	8.67082	8.63293	6.87039	6.69063	6.79037
ZNF462	4.53038	2.17963	6.85875	4.67895	5.76885	43.6572	3.97485e-25	7.58588e-23	6.89273	6.85461	6.8289	4.75289	4.60167	4.68229
EPHA2	4.2152	2.0756	7.9027	5.82735	6.86502	43.6007	4.10397e-25	7.72503e-23	7.96799	7.94821	7.79189	5.8078	5.86649	5.80774
CCNT1	2.98427	1.57738	11.7714	10.194	10.9827	43.5015	4.34132e-25	7.92308e-23	11.7642	11.7829	11.767	10.2625	10.1144	10.205
FIZ1	4.90904	2.29544	6.8378	4.54257	5.69018	43.465	4.43227e-25	7.92308e-23	6.90924	6.85688	6.74728	4.54184	4.5781	4.50777
RCAN1	3.18983	1.67348	8.85691	7.18346	8.02018	43.4457	4.4813e-25	7.92308e-23	8.83759	8.88607	8.84705	7.21373	7.13293	7.20371
KLF7	3.96425	1.98705	7.49024	5.50331	6.49678	43.4393	4.49749e-25	7.92308e-23	7.52867	7.52598	7.41609	5.54017	5.46375	5.50601
MSMO1	4.35433	2.12245	6.95298	4.83098	5.89198	43.2421	5.03227e-25	8.75297e-23	6.98304	6.99296	6.88294	4.80587	4.80942	4.87766
IL7R	3.17152	1.66517	8.68565	7.0205	7.85307	43.0479	5.62356e-25	9.53992e-23	8.68929	8.69425	8.67339	7.04582	6.96585	7.04982
FRS2	3.75718	1.90965	12.0519	10.1423	11.0971	42.9907	5.81135e-25	9.73827e-23	12.0581	12.1234	11.9741	10.2337	10.0165	10.1768
ELK3	3.44483	1.78443	8.21594	6.43159	7.32377	42.7222	6.7833e-25	1.09321e-22	8.22979	8.25981	8.15822	6.4677	6.38234	6.44475
PRPF4B	3.73327	1.90044	8.14925	6.24863	7.19894	42.7072	6.84204e-25	1.09321e-22	8.14077	8.15716	8.14982	6.34701	6.15379	6.24508
ZNF548	4.72514	2.24036	6.32104	4.08068	5.20086	42.6104	7.23637e-25	1.11706e-22	6.31031	6.31038	6.34242	4.08614	4.02868	4.12722
SAT1	4.97855	2.31573	6.32475	4.00844	5.1666	42.61	7.23806e-25	1.11706e-22	6.33995	6.30042	6.33389	4.07883	4.01704	3.92946
RP11-611O2.1	38.1754	5.25457	5.8389	0.586233	3.21256	42.5914	7.31645e-25	1.11706e-22	5.76478	5.8888	5.86311	0.35251	0.644553	0.761637
SH3BP5L	4.23465	2.08224	7.0096	4.92773	5.96867	42.4945	7.73957e-25	1.15933e-22	7.07204	7.02288	6.93389	4.897	4.93125	4.95494
RC3H1	4.21242	2.07465	6.91802	4.8434	5.88071	42.4895	7.76206e-25	1.15933e-22	6.95802	6.94226	6.85378	4.86549	4.87216	4.79254
B4GALT5	3.24799	1.69955	8.71672	7.01722	7.86697	42.4544	7.92199e-25	1.1686e-22	8.73841	8.75548	8.65627	7.05911	6.99483	6.99773
C12orf5	3.91831	1.97023	7.0158	5.04585	6.03082	42.4387	7.99423e-25	1.1686e-22	7.03833	7.05054	6.95852	5.03465	5.04358	5.05932
LINC00657	3.3698	1.75266	11.2886	9.53593	10.4123	42.2393	8.97931e-25	1.27201e-22	11.3032	11.3237	11.2388	9.64042	9.43421	9.53317
TMED7	3.61984	1.85592	8.36151	6.50569	7.4336	42.2138	9.11423e-25	1.27795e-22	8.36431	8.39399	8.32623	6.54532	6.40224	6.5695
MIR137HG	5.11481	2.35468	6.61323	4.25859	5.43591	42.1517	9.45169e-25	1.31188e-22	6.58287	6.70074	6.55608	4.29768	4.30406	4.17402
CITED2	3.08471	1.62514	9.78512	8.16001	8.97256	41.8719	1.11391e-24	1.51547e-22	9.8386	9.78144	9.73532	8.20079	8.10129	8.17794
PPP1R37	4.46724	2.15938	7.33996	5.18099	6.26047	41.8259	1.14454e-24	1.54187e-22	7.41478	7.3678	7.23729	5.11902	5.25658	5.16736
ZSWIM6	3.81799	1.93282	7.81209	5.8792	6.84564	41.8001	1.1621e-24	1.55033e-22	7.79588	7.88594	7.75444	5.9538	5.86866	5.81515
UBOX5	5.59806	2.48493	6.18575	3.70081	4.94328	41.6324	1.28324e-24	1.66349e-22	6.23553	6.21876	6.10296	3.75346	3.72189	3.62708
MEX3B	3.91637	1.96952	7.51718	5.54793	6.53256	41.597	1.31043e-24	1.68286e-22	7.56179	7.57339	7.41636	5.56131	5.5301	5.5524
BDNF	4.60147	2.2021	7.36521	5.1635	6.26436	41.3996	1.47354e-24	1.86056e-22	7.37724	7.47622	7.24216	5.18519	5.14957	5.15575
AC008982.2	15.1317	3.9195	5.48644	1.56787	3.52715	41.393	1.47935e-24	1.86056e-22	5.54616	5.52634	5.38682	1.52915	1.57744	1.59701
UTP15	4.26287	2.09183	6.68359	4.59211	5.63785	41.3816	1.48942e-24	1.86056e-22	6.6585	6.74384	6.64844	4.60171	4.53657	4.63803
PRPF39	3.49468	1.80516	7.90185	6.09647	6.99916	41.335	1.53137e-24	1.89572e-22	7.89377	7.84008	7.97169	6.12058	6.0524	6.11643
KLF6	3.32461	1.73319	8.09695	6.36361	7.23028	41.2795	1.58299e-24	1.9402e-22	8.13775	8.05441	8.09868	6.41824	6.30705	6.36553
ARHGAP31	4.58666	2.19744	6.22375	4.02651	5.12513	41.2662	1.59554e-24	1.9402e-22	6.22477	6.26216	6.18432	4.04547	4.00137	4.0327
GREM1	2.94027	1.55595	9.78322	8.22732	9.00527	41.1637	1.69652e-24	2.03408e-22	9.7948	9.80692	9.74795	8.26761	8.16301	8.25134
RLIM	3.74733	1.90586	8.29305	6.38726	7.34015	41.1579	1.70235e-24	2.03408e-22	8.3222	8.34558	8.21136	6.46033	6.29425	6.40719
ZC3H11A	2.89313	1.53263	8.77932	7.24674	8.01303	41.137	1.7238e-24	2.04196e-22	8.80458	8.78166	8.75172	7.24508	7.24447	7.25066
RBM26	3.07451	1.62036	8.36731	6.74691	7.55711	41.114	1.74774e-24	2.05262e-22	8.37542	8.37527	8.35126	6.79545	6.70188	6.7434
METTL16	3.67991	1.87967	7.15509	5.27512	6.2151	40.9029	1.98423e-24	2.2912e-22	7.17708	7.10876	7.17941	5.28623	5.32191	5.21721
FAS	4.57712	2.19444	6.25767	4.06362	5.16064	40.8225	2.08284e-24	2.38503e-22	6.26847	6.27352	6.23103	4.04921	4.0053	4.13634
ETS1	3.61905	1.85561	8.96645	7.11097	8.03871	40.7227	2.21243e-24	2.51248e-22	8.97981	9.05313	8.86641	7.18444	7.05632	7.09214
INHBA	3.52244	1.81658	9.76078	7.94418	8.85248	40.535	2.47919e-24	2.76834e-22	9.78898	9.78383	9.70955	8.06114	7.8314	7.93998
F2R	3.44487	1.78445	8.67577	6.89123	7.7835	40.5337	2.48116e-24	2.76834e-22	8.7341	8.66609	8.62712	6.98358	6.81069	6.87942
E2F3	3.56289	1.83305	6.88564	5.05273	5.96919	40.4702	2.57886e-24	2.83488e-22	6.898	6.89009	6.86883	5.04594	5.02916	5.08309
AMIGO2	4.48277	2.16439	7.64163	5.47763	6.55963	40.4144	2.66808e-24	2.90969e-22	7.64299	7.76662	7.51527	5.50924	5.4261	5.49754
FAM46A	5.49954	2.45931	6.69263	4.23389	5.46326	40.356	2.76494e-24	2.99158e-22	6.73036	6.79439	6.55314	4.26907	4.18772	4.24487
ZNF699	5.09335	2.34861	7.65113	5.30234	6.47673	40.3416	2.7894e-24	2.99446e-22	7.61055	7.73452	7.60831	5.45522	5.12538	5.32642
FLVCR1	5.67797	2.50538	6.51635	4.01007	5.26321	40.2783	2.89931e-24	3.08833e-22	6.54976	6.5242	6.47509	4.19494	3.96143	3.87385
RHOB	3.25238	1.7015	8.74534	7.04402	7.89468	40.176	3.08687e-24	3.23791e-22	8.82697	8.74154	8.66752	7.02053	7.02808	7.08345
RBAK	4.61348	2.20586	7.06931	4.86347	5.96639	40.119	3.19666e-24	3.30266e-22	7.1356	7.08124	6.99109	4.95604	4.73083	4.90353
FOSL1	5.04957	2.33616	7.37365	5.03814	6.20589	40.0998	3.23472e-24	3.31704e-22	7.41504	7.48919	7.21671	4.9954	5.08877	5.03026
FLRT2	3.35511	1.74636	8.9972	7.25093	8.12407	39.9115	3.63238e-24	3.69723e-22	9.00786	9.06438	8.91937	7.33085	7.18393	7.23801
LRIG2	3.80985	1.92974	6.89819	4.96805	5.93312	39.8027	3.88487e-24	3.89725e-22	6.89612	6.89267	6.90576	5.06271	4.90517	4.93627
SETD1B	4.16927	2.0598	6.75192	4.69198	5.72195	39.8024	3.88562e-24	3.89725e-22	6.80363	6.72948	6.72265	4.6823	4.78675	4.60688
HTRA1	3.02934	1.59901	8.53431	6.93538	7.73485	39.7742	3.95406e-24	3.93715e-22	8.5984	8.5092	8.49532	6.90309	6.95521	6.94784
SNHG17	4.29676	2.10325	7.03708	4.93416	5.98562	39.7225	4.08279e-24	4.03609e-22	7.09911	7.06662	6.94551	4.88553	5.03495	4.882
STK17B	3.15703	1.65857	8.01502	6.35634	7.18568	39.6943	4.15491e-24	4.07804e-22	8.01138	7.99081	8.04288	6.40076	6.28538	6.38287
REPIN1	3.07673	1.6214	8.92451	7.30321	8.11386	39.5934	4.42381e-24	4.28082e-22	8.98123	8.93776	8.85453	7.28533	7.35611	7.26819
SF3B1	2.9383	1.55498	10.3685	8.81356	9.59104	39.5524	4.53803e-24	4.33035e-22	10.3766	10.3911	10.3379	8.87261	8.71796	8.8501
CLK1	3.44785	1.7857	7.24269	5.45707	6.34988	39.5151	4.64461e-24	4.40148e-22	7.21016	7.28857	7.22934	5.49215	5.39645	5.4826
NABP1	3.89934	1.96323	6.63412	4.67103	5.65258	39.423	4.91932e-24	4.62989e-22	6.58053	6.69652	6.62531	4.69311	4.64392	4.67605
E2F6	3.59943	1.84777	6.84668	4.99905	5.92286	39.3426	5.17297e-24	4.8355e-22	6.87908	6.87227	6.78867	5.01659	4.99198	4.98857
PELO	4.13856	2.04913	8.24386	6.19524	7.21955	39.2345	5.53546e-24	5.13937e-22	8.29705	8.34073	8.09381	6.13078	6.22425	6.23068
ZNF275	3.90163	1.96408	6.93011	4.96648	5.94829	39.1941	5.67784e-24	5.23619e-22	6.94825	6.99707	6.845	4.96994	4.92191	5.00758
PRPF38B	3.32121	1.73171	7.92114	6.18947	7.0553	39.0462	6.23178e-24	5.63361e-22	7.93172	7.98598	7.8457	6.2458	6.16306	6.15956
FOSL2	3.08229	1.624	9.3817	7.75784	8.56977	38.9673	6.54987e-24	5.84427e-22	9.42012	9.44282	9.28215	7.78363	7.76262	7.72727
LARP4B	3.27321	1.7107	7.14253	5.4317	6.28712	38.9161	6.76515e-24	5.99741e-22	7.12504	7.16504	7.13753	5.47346	5.42903	5.39261
ZFP30	4.04762	2.01707	6.7842	4.76683	5.77552	38.7839	7.35617e-24	6.47956e-22	6.71848	6.79675	6.83738	4.83869	4.67389	4.78792
SDE2	3.92803	1.97381	7.24664	5.27294	6.25979	38.7378	7.57494e-24	6.62976e-22	7.28452	7.28268	7.17273	5.34605	5.15755	5.31522
ARID5B	3.03701	1.60265	8.65987	7.05702	7.85845	38.6998	7.75971e-24	6.73931e-22	8.65966	8.616	8.70396	7.12558	6.99037	7.05512
MIDN	3.06593	1.61633	8.0426	6.42635	7.23447	38.3481	9.71449e-24	8.27145e-22	8.11545	8.00212	8.01023	6.39341	6.43979	6.44585
BCL9L	3.22508	1.68933	7.93826	6.24891	7.09358	38.3421	9.75166e-24	8.27145e-22	8.02022	7.92012	7.87443	6.26001	6.28052	6.20621
AHDC1	3.62526	1.85808	7.17919	5.32086	6.25002	38.3252	9.85833e-24	8.31063e-22	7.26016	7.13172	7.14568	5.34758	5.36465	5.25034
ZNF281	3.36561	1.75087	7.01997	5.26906	6.14452	38.2697	1.02162e-23	8.5598e-22	7.03969	7.03059	6.98964	5.32304	5.21047	5.27367
BRF2	5.12578	2.35777	5.68292	3.32487	4.5039	38.2421	1.03989e-23	8.66007e-22	5.73731	5.66647	5.64499	3.37506	3.32546	3.27409
ATXN7L3B	3.05359	1.61051	7.64903	6.03864	6.84383	38.1536	1.10086e-23	9.05805e-22	7.67604	7.68221	7.58884	6.04898	6.04525	6.02167
ZNF669	6.09191	2.6069	5.90047	3.2935	4.59698	38.0823	1.15269e-23	9.42805e-22	5.97112	5.94599	5.78429	3.39874	3.24789	3.23387
FGF2	3.32138	1.73178	8.20816	6.47651	7.34233	37.9476	1.25767e-23	1.02259e-21	8.22035	8.28626	8.11786	6.53267	6.41264	6.48421
ABL2	2.9097	1.54087	8.67348	7.13259	7.90304	37.9097	1.28902e-23	1.04191e-21	8.67784	8.68748	8.65513	7.19505	7.05204	7.1507
KIAA1462	3.57558	1.83818	7.21629	5.37785	6.29707	37.8469	1.34265e-23	1.07891e-21	7.24013	7.2189	7.18985	5.48732	5.28518	5.36106
NFAT5	4.21575	2.07579	7.98991	5.91374	6.95183	37.7274	1.45124e-23	1.15939e-21	7.98189	7.97246	8.0154	6.07447	5.73231	5.93444
GLTSCR1	3.76614	1.91309	6.49169	4.57856	5.53513	37.6619	1.51456e-23	1.19607e-21	6.52319	6.44001	6.51187	4.52445	4.63887	4.57236
SETD1A	3.70751	1.89045	7.05456	5.16447	6.10951	37.6525	1.52388e-23	1.19655e-21	7.12246	7.09122	6.94999	5.14463	5.20021	5.14856
ZNF426	9.36811	3.22776	5.05465	1.82637	3.44051	37.6175	1.55916e-23	1.2173e-21	5.06954	5.02775	5.06668	1.91302	1.70868	1.8574
RBPJ	3.06797	1.61728	7.81183	6.19438	7.00311	37.5764	1.6016e-23	1.23943e-21	7.81472	7.80724	7.81353	6.27207	6.11836	6.19272
ZNF677	3.74948	1.90669	6.56517	4.65857	5.61187	37.5726	1.60555e-23	1.23943e-21	6.60054	6.53792	6.55705	4.67019	4.57546	4.73006
ZNF654	5.48942	2.45665	6.02987	3.57395	4.80191	37.5615	1.61726e-23	1.2415e-21	6.04496	6.13717	5.90749	3.60362	3.53317	3.58507
SOX4	3.52609	1.81807	6.56322	4.745	5.65411	37.5281	1.65305e-23	1.25872e-21	6.59173	6.5571	6.54083	4.7981	4.70324	4.73367
PURB	3.15959	1.65974	8.7858	7.12606	7.95593	37.5235	1.65802e-23	1.25872e-21	8.81647	8.82138	8.71955	7.22059	7.04059	7.117
TOR1AIP2	2.96482	1.56794	7.82054	6.25251	7.03653	37.4745	1.71218e-23	1.2927e-21	7.83431	7.78162	7.8457	6.27408	6.19355	6.28991
LIN7C	3.92785	1.97374	6.40686	4.43333	5.4201	37.4592	1.72944e-23	1.2986e-21	6.40065	6.46003	6.3599	4.48075	4.35428	4.46498
NFE2L2	2.81426	1.49276	8.01214	6.51944	7.26579	37.4376	1.75416e-23	1.31e-21	8.02848	8.00791	8.00002	6.52361	6.47567	6.55902
ZNF408	4.50124	2.17032	5.91029	3.74064	4.82547	37.3808	1.82089e-23	1.35248e-21	5.93127	5.95801	5.8416	3.71154	3.72189	3.78849
MIEF1	2.94794	1.55971	7.85875	6.29911	7.07893	37.3282	1.88504e-23	1.3926e-21	7.88924	7.89055	7.79645	6.33017	6.2793	6.28786
UTP3	3.89646	1.96216	6.77214	4.81003	5.79108	37.3164	1.89968e-23	1.3942e-21	6.79598	6.83979	6.68065	4.88343	4.78561	4.76105
CHPF2	2.94333	1.55745	8.31581	6.75841	7.53711	37.1903	2.06458e-23	1.50103e-21	8.38014	8.31581	8.25148	6.75332	6.80139	6.72054
MARCH4	3.08622	1.62584	7.18247	5.55677	6.36962	36.9696	2.38977e-23	1.7103e-21	7.20075	7.21537	7.1313	5.55803	5.57909	5.53319
XBP1	2.57518	1.36467	8.69931	7.33464	8.01698	36.9353	2.44484e-23	1.74065e-21	8.71864	8.68663	8.69266	7.32507	7.33965	7.33921
PTX3	2.40604	1.26666	11.0537	9.78716	10.4204	36.8164	2.64633e-23	1.85526e-21	11.0513	11.0969	11.0129	9.77449	9.77831	9.80869
INO80D	4.11727	2.04169	6.17284	4.13067	5.15175	36.7189	2.82452e-23	1.96019e-21	6.15098	6.13406	6.23347	4.18816	4.04406	4.15978
KLF2	4.60599	2.20351	5.77418	3.57096	4.67257	36.6775	2.90396e-23	1.99918e-21	5.8512	5.74934	5.722	3.53851	3.58666	3.58773
ZNF394	4.79733	2.26223	6.13902	3.87746	5.00824	36.6745	2.90981e-23	1.99918e-21	6.17972	6.20577	6.03158	3.82729	3.97553	3.82955
BRIX1	3.15159	1.65608	7.71204	6.05629	6.88417	36.6512	2.95555e-23	2.02051e-21	7.70919	7.76219	7.66474	6.03771	5.98826	6.14291
BRD4	2.97339	1.57211	7.91685	6.34482	7.13083	36.5922	3.0749e-23	2.09169e-21	7.9787	7.93218	7.83969	6.36101	6.35601	6.31743
TSSC4	3.1966	1.67654	7.09937	5.42297	6.26117	36.5703	3.12035e-23	2.11216e-21	7.15775	7.0925	7.04785	5.39617	5.46874	5.40398
MBNL2	3.01161	1.59053	7.4537	5.8632	6.65845	36.5585	3.14521e-23	2.11854e-21	7.48453	7.44868	7.4279	5.89674	5.79387	5.89898
CBLL1	3.11655	1.63995	7.10525	5.46525	6.28525	36.4424	3.40075e-23	2.26217e-21	7.11731	7.12202	7.07643	5.47415	5.51914	5.40247
SCG2	3.06335	1.61511	6.97054	5.35539	6.16296	36.4394	3.40783e-23	2.26217e-21	6.99012	6.98123	6.94028	5.3888	5.34538	5.33199
SELPLG	11.6109	3.53741	5.1378	1.60026	3.36903	36.4224	3.44702e-23	2.27719e-21	5.2382	5.13624	5.03895	1.63262	1.66956	1.4986
RGMB	2.45251	1.29426	9.62498	8.33067	8.97782	36.3852	3.53452e-23	2.32382e-21	9.59889	9.63355	9.64249	8.35322	8.32413	8.31467
AHR	3.49764	1.80638	8.11489	6.30822	7.21156	36.3705	3.56979e-23	2.32618e-21	8.11803	8.09066	8.13597	6.43658	6.16306	6.32503
ZFAND5	2.92768	1.54976	8.0207	6.47093	7.24582	36.3657	3.58156e-23	2.32618e-21	8.05267	8.044	7.96545	6.53534	6.41375	6.46371
FNBP4	2.69784	1.43181	7.96111	6.52934	7.24523	36.2295	3.92719e-23	2.51601e-21	7.95865	7.98356	7.94112	6.52159	6.56166	6.50478
PVT1	3.92086	1.97117	5.93278	3.96187	4.94733	36.2162	3.96261e-23	2.51601e-21	5.9437	5.94102	5.91361	3.91405	4.01509	3.95649
ZNF263	3.00035	1.58513	7.20222	5.61699	6.40961	36.2154	3.96494e-23	2.51601e-21	7.22312	7.16839	7.21516	5.59628	5.66863	5.58607
MED13L	3.2174	1.6859	8.22583	6.53982	7.38282	36.2055	3.99163e-23	2.51601e-21	8.20523	8.25236	8.21988	6.64582	6.41597	6.55767
RP11-244F12.3	7.65486	2.93638	5.44741	2.51171	3.97956	36.1567	4.1259e-23	2.58877e-21	5.47839	5.55268	5.31117	2.56883	2.47052	2.49577
CBX8	4.49551	2.16849	5.92504	3.75736	4.8412	36.1299	4.20181e-23	2.62441e-21	5.93786	5.99484	5.8424	3.6949	3.81672	3.76046
ZNF526	4.40507	2.13917	5.89636	3.75773	4.82705	36.1046	4.27469e-23	2.65785e-21	5.95964	5.91949	5.80995	3.72331	3.79416	3.75573
NEDD9	3.40622	1.76817	6.93833	5.17044	6.05439	36.0719	4.37076e-23	2.70535e-21	6.96808	7.00152	6.8454	5.18519	5.18208	5.14404
ACIN1	2.49035	1.31635	9.59669	8.28034	8.93851	36.0596	4.40765e-23	2.71595e-21	9.58944	9.60674	9.59388	8.2662	8.33169	8.24313
RAP1B	2.46812	1.30341	10.3454	9.04196	9.69368	35.9442	4.76833e-23	2.92508e-21	10.3483	10.3471	10.3407	9.08143	8.97431	9.07015
ILF3-AS1	4.49886	2.16956	6.0747	3.90565	4.99018	35.9208	4.84532e-23	2.95909e-21	6.11973	6.12657	5.97782	3.86814	4.00137	3.84743
PHF23	3.046	1.60691	7.00357	5.39678	6.20018	35.878	4.98916e-23	3.02009e-21	7.03183	6.99433	6.98456	5.35516	5.44866	5.38651
CHD1	3.13168	1.64694	7.49989	5.85304	6.67646	35.8597	5.05213e-23	3.0448e-21	7.45008	7.59074	7.45883	5.89102	5.85182	5.81628
ZBED6	8.30559	3.05408	6.24598	3.1912	4.71859	35.8188	5.19567e-23	3.10408e-21	6.2462	6.25645	6.23531	3.44211	2.8312	3.30029
BGN	3.12672	1.64465	7.84127	6.19685	7.01906	35.7174	5.56999e-23	3.29902e-21	7.91101	7.86413	7.74867	6.15488	6.25967	6.17601
ZNF579	3.4093	1.76947	6.92151	5.15242	6.03696	35.7033	5.62434e-23	3.31273e-21	6.98198	6.88603	6.89652	5.05621	5.1942	5.20685
NR3C1	3.26002	1.70488	7.49596	5.79107	6.64351	35.6989	5.64136e-23	3.31273e-21	7.5059	7.52811	7.45386	5.87634	5.67605	5.82081
CNOT4	3.20261	1.67925	6.57331	4.89394	5.73362	35.6905	5.67387e-23	3.31764e-21	6.59915	6.56128	6.5595	4.93089	4.86243	4.88849
EEA1	3.41091	1.77015	7.69653	5.92615	6.81134	35.6456	5.85205e-23	3.40733e-21	7.66724	7.69958	7.72276	6.03347	5.7836	5.96137
GJA1	2.75511	1.46211	8.77521	7.31306	8.04413	35.6391	5.8782e-23	3.40811e-21	8.79543	8.7894	8.74079	7.39258	7.24197	7.30464
TMEM200A	6.71704	2.74783	5.25479	2.50717	3.88098	35.6317	5.90817e-23	3.4111e-21	5.25356	5.34336	5.16745	2.58955	2.46482	2.46715
AKAP17A	4.54286	2.1836	7.05681	4.87389	5.96535	35.6241	5.93918e-23	3.41465e-21	7.15586	7.12578	6.88877	4.81469	4.95788	4.8491
PSMD12	2.77472	1.47234	7.70377	6.23151	6.96764	35.6107	5.99435e-23	3.43108e-21	7.70361	7.73143	7.67627	6.25758	6.17969	6.25726
SPRY1	3.75402	1.90844	7.34432	5.43611	6.39022	35.5797	6.12384e-23	3.47718e-21	7.40211	7.42596	7.2049	5.50038	5.39869	5.40926
SGK223	3.64612	1.86636	7.86221	5.99631	6.92926	35.5373	6.30572e-23	3.56572e-21	7.919	7.96197	7.70567	5.97364	6.01045	6.00484
ZMPSTE24	2.87598	1.52405	7.65425	6.1301	6.89218	35.446	6.71628e-23	3.76533e-21	7.68238	7.65077	7.62962	6.19768	6.0647	6.1279
ZNF200	4.62049	2.20805	5.93819	3.73071	4.83445	35.4407	6.74093e-23	3.76533e-21	5.96683	6.02473	5.82302	3.74886	3.74795	3.69531
NAA16	2.92492	1.5484	6.96101	5.41264	6.18682	35.3984	6.94137e-23	3.86159e-21	6.97878	6.9483	6.95593	5.41298	5.38517	5.43978
VPS18	3.89258	1.96073	6.69933	4.73851	5.71892	35.3722	7.06886e-23	3.91666e-21	6.78951	6.7062	6.60228	4.78805	4.78561	4.64188
ZNF384	2.93507	1.5534	7.38605	5.83272	6.60938	35.3607	7.12556e-23	3.93222e-21	7.43383	7.39171	7.3326	5.82756	5.87834	5.79225
CWC22	3.12233	1.64262	6.94613	5.30351	6.12482	35.3498	7.17955e-23	3.94617e-21	6.96378	6.94865	6.92596	5.34834	5.22151	5.34069
CAB39	2.88562	1.52888	7.64017	6.11113	6.87565	35.3125	7.36796e-23	4.03359e-21	7.65617	7.62085	7.64349	6.17772	6.03326	6.12241
CTTNBP2NL	3.3626	1.74958	7.20895	5.45941	6.33418	35.2859	7.50545e-23	4.09256e-21	7.25341	7.2451	7.12835	5.5435	5.37228	5.46244
BCLAF1	2.68569	1.42529	9.59286	8.16756	8.88021	35.2779	7.54737e-23	4.09914e-21	9.57752	9.63095	9.5701	8.24626	8.08268	8.17374
TLE4	2.90337	1.53773	7.43839	5.9005	6.66944	35.2628	7.62714e-23	4.12616e-21	7.43331	7.44542	7.43642	5.97364	5.83479	5.89307
MBD5	3.68306	1.8809	5.93377	4.0526	4.99318	35.2011	7.96156e-23	4.26731e-21	5.9437	5.92958	5.92804	4.09703	4.05169	4.00907
NFKBIZ	3.2353	1.6939	7.31439	5.62083	6.46761	35.1957	7.99164e-23	4.26731e-21	7.3656	7.37362	7.20397	5.62856	5.60848	5.62546
CD59	2.57082	1.36223	8.71979	7.35767	8.03873	35.1761	8.10179e-23	4.26731e-21	8.71939	8.76466	8.67531	7.37683	7.323	7.37317
UGDH	2.67882	1.4216	7.87133	6.44959	7.16046	35.1754	8.10544e-23	4.26731e-21	7.88583	7.84103	7.88712	6.48922	6.40894	6.45061
UBQLN2	3.02587	1.59735	7.11746	5.5203	6.31888	35.1489	8.25674e-23	4.33037e-21	7.16651	7.14012	7.04576	5.53417	5.50114	5.52558
SUV420H1	2.82386	1.49767	7.11206	5.61446	6.36326	35.0944	8.57707e-23	4.48127e-21	7.12664	7.10908	7.10044	5.59051	5.64108	5.61179
PPIG	2.71583	1.44139	7.9268	6.48534	7.20607	35.0874	8.61935e-23	4.4863e-21	7.89603	7.96249	7.92189	6.54167	6.45209	6.46226
DYRK1A	3.08925	1.62726	7.37676	5.74964	6.5632	35.0407	8.90568e-23	4.60551e-21	7.3912	7.42341	7.31566	5.80393	5.6649	5.78008
SNAI2	2.59399	1.37517	8.23488	6.85976	7.54732	35.0391	8.9154e-23	4.60551e-21	8.24317	8.27076	8.19072	6.88146	6.85387	6.84396
UGCG	2.63831	1.39962	8.91441	7.51478	8.2146	35.0304	8.9699e-23	4.61568e-21	8.90527	8.89924	8.93873	7.52521	7.43933	7.57981
RIN2	2.74687	1.45779	7.29662	5.83893	6.56778	35.0252	9.00227e-23	4.61568e-21	7.29883	7.29165	7.29939	5.81001	5.84306	5.86372
ZNF317	3.15103	1.65583	7.29008	5.63431	6.4622	35.0042	9.13601e-23	4.66684e-21	7.32703	7.3324	7.21082	5.65522	5.6865	5.56123
EIF3A	2.44276	1.28851	9.93721	8.64863	9.29292	34.9873	9.24469e-23	4.70089e-21	9.94268	9.94282	9.92613	8.71556	8.61409	8.61624
ZNF7	3.36769	1.75176	6.3651	4.61353	5.48932	34.9832	9.27109e-23	4.70089e-21	6.3641	6.40533	6.32588	4.60426	4.66397	4.57236
TNFRSF10B	2.54498	1.34765	8.692	7.34444	8.01822	34.9767	9.3135e-23	4.70503e-21	8.69871	8.73673	8.64056	7.35846	7.34179	7.33308
ZNF557	5.88964	2.55818	5.07225	2.51413	3.79319	34.9703	9.35592e-23	4.70915e-21	5.11553	5.03043	5.0708	2.51026	2.4591	2.57303
CTCF	2.7294	1.44858	7.50208	6.05351	6.77779	34.955	9.45649e-23	4.71302e-21	7.52526	7.51717	7.4638	6.08134	6.04478	6.03441
ZNF282	3.22043	1.68725	6.88856	5.20141	6.04498	34.9535	9.46651e-23	4.71302e-21	6.93438	6.924	6.80728	5.23864	5.20535	5.16023
RBM4	8.30083	3.05325	5.07823	2.02329	3.55076	34.9189	9.699e-23	4.79849e-21	5.0453	5.01427	5.17512	2.09794	2.08831	1.88363
ZZZ3	3.08306	1.62436	7.27587	5.65136	6.46361	34.9111	9.75271e-23	4.8033e-21	7.22642	7.28409	7.3171	5.70592	5.56183	5.68633
EXT1	2.37875	1.2502	9.38821	8.13803	8.76312	34.906	9.78788e-23	4.8034e-21	9.39157	9.40607	9.36699	8.14534	8.15285	8.11591
SERPINE2	2.61468	1.38664	8.22028	6.83367	7.52698	34.8742	1.00085e-22	4.87776e-21	8.27304	8.2153	8.17249	6.84342	6.83382	6.82378
C6orf120	2.76885	1.46929	8.0378	6.56859	7.3032	34.874	1.00104e-22	4.87776e-21	8.04403	8.06703	8.00235	6.60633	6.48978	6.60967
GPATCH8	2.75939	1.46435	7.37689	5.91271	6.6448	34.7981	1.05596e-22	5.09121e-21	7.38397	7.40443	7.34228	5.88788	5.9459	5.90433
SNHG15	3.33885	1.73935	7.09788	5.3589	6.22839	34.6594	1.16457e-22	5.55636e-21	7.12471	7.18111	6.98783	5.3851	5.32664	5.36495
RAE1	2.61088	1.38454	7.90216	6.51766	7.20991	34.6459	1.17573e-22	5.59021e-21	7.90616	7.92121	7.87913	6.50907	6.55899	6.48492
THUMPD3	4.50392	2.17118	5.65457	3.483	4.56878	34.6407	1.18006e-22	5.59144e-21	5.68946	5.67506	5.5992	3.57274	3.5001	3.37615
TGFBR2	2.9348	1.55326	7.36176	5.80855	6.58515	34.6255	1.19283e-22	5.63252e-21	7.37535	7.40443	7.30551	5.86841	5.75235	5.80489
RBM39	2.34757	1.23117	9.66844	8.43728	9.05286	34.6088	1.20702e-22	5.68e-21	9.64078	9.68432	9.68023	8.4466	8.41084	8.45439
CREBZF	2.89044	1.53129	8.05636	6.52508	7.29072	34.6011	1.2136e-22	5.69147e-21	8.03875	8.12241	8.00791	6.60283	6.4564	6.516
AGO2	4.50287	2.17085	6.32681	4.15559	5.2412	34.5062	1.29819e-22	6.06749e-21	6.34051	6.31808	6.32185	4.29926	3.95331	4.21419
RBM25	2.61379	1.38614	9.13423	7.74806	8.44114	34.4989	1.30493e-22	6.07831e-21	9.13053	9.16591	9.10626	7.83348	7.70287	7.70783
RP1-140K8.5	5.53497	2.46858	6.20841	3.7394	4.97391	34.4451	1.35581e-22	6.29396e-21	6.18157	6.23859	6.20506	3.92632	3.48045	3.81145
KANSL2	2.38678	1.25507	10.8246	9.56967	10.1971	34.4351	1.36543e-22	6.3173e-21	10.8416	10.8788	10.7535	9.57048	9.55319	9.58534
YIPF5	2.69234	1.42886	7.98988	6.56112	7.2755	34.4271	1.37321e-22	6.33198e-21	8.01225	8.01909	7.93831	6.58939	6.5041	6.58989
SPTY2D1	3.33324	1.73693	6.70406	4.96739	5.83572	34.4006	1.39942e-22	6.43126e-21	6.7392	6.73606	6.63692	5.00796	4.87968	5.01452
TMEM185B	2.87909	1.52561	7.40911	5.88365	6.64638	34.3568	1.44383e-22	6.61324e-21	7.42864	7.45643	7.34228	5.92249	5.837	5.89146
RNF169	4.31654	2.10988	5.9483	3.83862	4.89346	34.3467	1.45422e-22	6.63868e-21	5.9818	6.00237	5.86073	3.93241	3.73379	3.84965
DNAJA2	2.68069	1.42261	7.50553	6.08301	6.79427	34.2923	1.51189e-22	6.87911e-21	7.53593	7.52051	7.46014	6.09816	6.06753	6.08333
SNX22	17.5985	4.13738	5.11706	0.98018	3.04862	34.2816	1.52347e-22	6.89614e-21	5.1626	5.21257	4.976	0.973392	1.15002	0.817132
ZFAS1	2.91046	1.54125	8.54422	7.00332	7.77377	34.2796	1.52567e-22	6.89614e-21	8.56078	8.62335	8.44853	6.93431	7.04966	7.02597
TNC	2.59668	1.37667	10.3545	8.97778	9.66612	34.2701	1.53605e-22	6.92026e-21	10.4408	10.335	10.2876	9.03633	8.94184	8.95517
MAP3K11	3.05249	1.60998	7.20427	5.59452	6.3994	34.2315	1.579e-22	7.09054e-21	7.2625	7.22856	7.12175	5.57046	5.65053	5.56258
ZNF304	3.33436	1.73741	6.19655	4.45902	5.32779	34.2038	1.61067e-22	7.20917e-21	6.18712	6.21758	6.18495	4.48075	4.498	4.39831
KIAA0947	2.74978	1.45932	8.40215	6.94271	7.67243	34.1909	1.62557e-22	7.25224e-21	8.38323	8.38289	8.44034	7.00302	6.84704	6.97808
YWHAG	2.37495	1.2479	9.90868	8.66082	9.28475	34.1656	1.65531e-22	7.3455e-21	9.93381	9.9291	9.86313	8.69688	8.62371	8.66187
LRRC14	3.29991	1.72243	6.42607	4.70394	5.56501	34.1503	1.67361e-22	7.37084e-21	6.46195	6.43193	6.38435	4.6469	4.77643	4.6885
ANKRD40	2.77316	1.47153	7.53027	6.05886	6.79456	34.1331	1.69441e-22	7.41638e-21	7.56747	7.55954	7.4638	6.09001	6.02892	6.05764
KLHL9	3.43007	1.77824	7.5841	5.806	6.69505	34.1074	1.72596e-22	7.51893e-21	7.6078	7.60924	7.53526	5.87158	5.64424	5.90219
TSPYL5	2.59127	1.37366	8.04574	6.67217	7.35895	34.1049	1.72912e-22	7.51893e-21	8.07778	8.07062	7.98883	6.69116	6.65382	6.67151
ZNF136	3.69915	1.88719	5.78353	3.89661	4.84007	34.0906	1.74693e-22	7.54862e-21	5.7689	5.82693	5.75476	3.90993	3.86731	3.91258
TIPARP	3.0419	1.60497	7.94785	6.34308	7.14546	34.0171	1.84179e-22	7.87887e-21	7.99882	8.00706	7.83768	6.3838	6.27564	6.36979
MAP3K2	3.21499	1.68481	7.35061	5.66555	6.50808	34.0137	1.8463e-22	7.87887e-21	7.35029	7.37494	7.32659	5.79001	5.55043	5.65622
ZFX	3.29889	1.72198	7.11083	5.38868	6.24975	34.0035	1.85992e-22	7.88802e-21	7.12792	7.1336	7.07097	5.50516	5.27054	5.39033
CCNL1	3.17188	1.66534	8.18273	6.51756	7.35015	33.9816	1.88956e-22	7.98905e-21	8.16268	8.30354	8.08196	6.58133	6.45676	6.5146
IMPAD1	2.54444	1.34735	8.4232	7.07592	7.74956	33.9674	1.90891e-22	8.04614e-21	8.44565	8.452	8.37196	7.11065	7.03555	7.08156
GDF6	2.55087	1.35099	9.36144	8.01055	8.68599	33.9238	1.96994e-22	8.27798e-21	9.40902	9.39337	9.28193	8.04951	7.97822	8.00391
BTBD10	3.09678	1.63077	6.64174	5.01117	5.82645	33.9157	1.98145e-22	8.30094e-21	6.67571	6.66582	6.58369	5.03842	4.96092	5.03417
SPRY2	2.8883	1.53022	7.29202	5.762	6.52701	33.8815	2.03116e-22	8.45762e-21	7.33455	7.33349	7.20802	5.77708	5.75644	5.75247
COL6A1	2.45602	1.29632	10.5205	9.22429	9.87242	33.8596	2.0635e-22	8.56632e-21	10.5973	10.5143	10.45	9.20512	9.25919	9.20856
RPL18A	3.12826	1.64536	7.65604	6.01115	6.8336	33.8483	2.08048e-22	8.61081e-21	7.71305	7.71362	7.54145	5.94578	6.0562	6.03148
MPHOSPH10	2.54395	1.34707	7.67925	6.33228	7.00577	33.837	2.09758e-22	8.65552e-21	7.67516	7.68859	7.67401	6.31859	6.31737	6.36087
CCNT2	2.57926	1.36696	7.5285	6.16147	6.84498	33.783	2.18125e-22	8.97384e-21	7.50615	7.52241	7.55693	6.1644	6.15777	6.16224
ANKLE2	2.56569	1.35935	7.57295	6.21361	6.89328	33.7515	2.23166e-22	9.12655e-21	7.5696	7.59233	7.55693	6.2265	6.22425	6.19009
SPEN	2.63924	1.40013	7.66586	6.26573	6.9658	33.7353	2.25803e-22	9.20702e-21	7.71923	7.64225	7.63611	6.28523	6.2356	6.27636
NET1	2.62839	1.39418	7.93261	6.53851	7.23556	33.7238	2.27693e-22	9.2566e-21	7.92713	7.97507	7.89565	6.5755	6.48204	6.55801
PPIL4	2.76695	1.4683	7.1464	5.67785	6.41212	33.7056	2.30717e-22	9.35185e-21	7.13272	7.12547	7.181	5.72301	5.63918	5.67135
STK17A	2.66908	1.41634	7.42061	6.00453	6.71257	33.6736	2.36146e-22	9.51577e-21	7.42629	7.45493	7.38062	5.97068	6.01436	6.02855
ADO	2.8678	1.51995	6.9102	5.39043	6.15031	33.6471	2.40743e-22	9.67266e-21	6.93108	6.94653	6.85299	5.40642	5.37988	5.38498
GTPBP4	2.69504	1.43031	7.49179	6.06166	6.77673	33.5842	2.52031e-22	1.00967e-20	7.53496	7.51358	7.42683	6.05737	6.06518	6.06243
RIOK2	2.8085	1.4898	7.06713	5.57765	6.32239	33.5638	2.55806e-22	1.02181e-20	7.05865	7.11698	7.02576	5.55868	5.56116	5.6131
ZNF184	3.90249	1.96439	5.83599	3.8722	4.8541	33.5209	2.63946e-22	1.05072e-20	5.88573	5.83462	5.78763	3.83599	3.80774	3.97287
CDK12	2.59847	1.37766	7.90555	6.52785	7.2167	33.5177	2.64572e-22	1.05072e-20	7.93594	7.91632	7.86439	6.58197	6.49258	6.509
PRRC1	2.59449	1.37545	8.45823	7.08276	7.77049	33.4597	2.76022e-22	1.09303e-20	8.45373	8.48461	8.43636	7.15455	7.00886	7.08486
HNRNPL	2.56427	1.35855	8.39523	7.03675	7.71599	33.4494	2.78109e-22	1.09675e-20	8.42844	8.41222	8.34504	7.02148	7.09605	6.99272
UTP23	3.0296	1.59913	6.62619	5.02708	5.82664	33.4242	2.83285e-22	1.10891e-20	6.6647	6.60733	6.60654	5.05342	4.95991	5.06792
GNA13	2.93688	1.55428	7.56432	6.01011	6.78722	33.4228	2.83587e-22	1.10891e-20	7.56108	7.62418	7.50771	6.08226	5.91905	6.02904
BBC3	5.6062	2.48702	5.43737	2.95059	4.19398	33.4126	2.85715e-22	1.11218e-20	5.48641	5.50529	5.32042	2.97142	3.05643	2.82392
COL6A2	2.53718	1.34322	10.2808	8.93767	9.60924	33.388	2.90914e-22	1.126e-20	10.3733	10.2639	10.2053	8.90455	8.97826	8.93022
FAT4	3.66408	1.87345	7.15457	5.28077	6.21767	33.3457	3.00066e-22	1.15496e-20	7.20865	7.11982	7.13524	5.41806	5.10902	5.31522
MAST4	3.89251	1.9607	5.74931	3.78821	4.76876	33.2432	3.23567e-22	1.23504e-20	5.74234	5.73051	5.77507	3.86814	3.67821	3.81827
NDUFAF5	3.53245	1.82067	6.23191	4.4119	5.3219	33.2173	3.29789e-22	1.2553e-20	6.23612	6.28927	6.17033	4.39947	4.33409	4.50213
CCDC71L	3.10804	1.636	6.83911	5.20319	6.02115	33.1731	3.40719e-22	1.28729e-20	6.86415	6.85082	6.80234	5.25819	5.09432	5.25705
ZNF436	3.17857	1.66838	6.17702	4.50875	5.34288	33.1719	3.41004e-22	1.28729e-20	6.21937	6.16975	6.14193	4.51771	4.48539	4.52314
QTRTD1	3.45701	1.78953	6.52305	4.73403	5.62854	33.1135	3.56038e-22	1.34036e-20	6.5464	6.60733	6.41541	4.76546	4.68742	4.74921
CSTF1	2.57432	1.36419	7.29986	5.93572	6.61779	33.0261	3.79818e-22	1.42598e-20	7.3065	7.30278	7.2903	5.93924	5.90963	5.95829
RBM33	2.56144	1.35695	7.40906	6.05203	6.73054	33.0202	3.81481e-22	1.42832e-20	7.3904	7.42392	7.41285	6.08409	6.03759	6.03441
RIPK2	3.16777	1.66347	6.4677	4.80448	5.63609	32.9373	4.05667e-22	1.51475e-20	6.49314	6.48809	6.42187	4.83219	4.7189	4.86235
ZNF398	3.41688	1.77268	6.49358	4.72097	5.60727	32.9178	4.1159e-22	1.5327e-20	6.49613	6.57189	6.41271	4.78468	4.74148	4.63675
FILIP1L	2.5552	1.35344	7.72584	6.37231	7.04908	32.9022	4.16396e-22	1.5464e-20	7.76591	7.67474	7.73686	6.38009	6.34557	6.39128
ZNF678	3.91616	1.96944	6.87425	4.90504	5.88964	32.892	4.19567e-22	1.55201e-20	6.86607	6.93834	6.81833	5.00024	4.70929	5.00559
TRAF4	3.2252	1.68939	7.19272	5.50376	6.34824	32.8901	4.20164e-22	1.55201e-20	7.25723	7.25201	7.06891	5.47206	5.5645	5.47471
YRDC	4.31263	2.10857	5.77771	3.66952	4.72362	32.7539	4.65048e-22	1.70862e-20	5.84341	5.83922	5.6505	3.71861	3.67327	3.61669
TRAF6	4.01712	2.00616	5.73499	3.72832	4.73165	32.7039	4.82741e-22	1.76889e-20	5.72634	5.77594	5.70269	3.8575	3.69779	3.62966
KBTBD6	3.02475	1.59682	6.81536	5.21877	6.01706	32.6796	4.91621e-22	1.79518e-20	6.83381	6.87227	6.73998	5.26786	5.15755	5.23089
TUG1	2.43122	1.28168	8.92403	7.64234	8.28318	32.6715	4.94606e-22	1.79798e-20	8.91738	8.95726	8.89744	7.71043	7.60046	7.61612
DNAJC27	4.08653	2.03088	5.24237	3.21147	4.22692	32.5218	5.53375e-22	1.99103e-20	5.27108	5.23946	5.21655	3.22753	3.2109	3.19599
YTHDF1	2.43767	1.2855	7.85144	6.56586	7.20865	32.5215	5.53506e-22	1.99103e-20	7.88241	7.82761	7.8443	6.58875	6.55832	6.55052
HNRNPC	2.23395	1.15959	10.201	9.04147	9.62123	32.5083	5.59029e-22	2.00397e-20	10.2171	10.2294	10.1565	9.04614	9.00938	9.0689
ZNF473	3.02927	1.59897	6.81018	5.21169	6.01093	32.5059	5.60022e-22	2.00397e-20	6.8603	6.85763	6.7126	5.18944	5.21473	5.23089
DNTTIP2	2.83185	1.50174	7.75524	6.25372	7.00448	32.4883	5.67477e-22	2.02538e-20	7.72941	7.84883	7.68747	6.28999	6.18577	6.2854
RBM22	2.61029	1.38421	7.02047	5.63632	6.3284	32.41	6.01959e-22	2.13184e-20	7.03867	7.02086	7.0019	5.62417	5.65805	5.62675
COL4A1	2.32802	1.2191	10.9006	9.68152	10.2911	32.3992	6.06896e-22	2.1438e-20	10.9513	10.916	10.8344	9.72728	9.62521	9.69208
BCL10	4.59865	2.20121	5.88066	3.67986	4.78026	32.3915	6.1043e-22	2.14679e-20	5.96396	5.94386	5.73416	3.76944	3.59972	3.67041
PCBP1	2.4685	1.30364	7.79487	6.49133	7.1431	32.3899	6.11183e-22	2.14679e-20	7.80252	7.82934	7.75273	6.49025	6.51207	6.47166
ZNF35	5.16849	2.36974	5.25487	2.88633	4.0706	32.3872	6.12432e-22	2.14679e-20	5.2676	5.35409	5.14291	2.8692	2.84882	2.94096
SOCS5	2.98566	1.57805	7.2155	5.63736	6.42643	32.3724	6.19311e-22	2.16538e-20	7.18573	7.2077	7.25307	5.68741	5.51431	5.71035
WAC	2.44234	1.28826	8.19451	6.90639	7.55045	32.3361	6.36512e-22	2.21987e-20	8.19716	8.23591	8.15046	6.91238	6.8696	6.93718
CCDC6	2.53686	1.34304	7.63729	6.29429	6.96579	32.3138	6.47372e-22	2.25204e-20	7.67362	7.65251	7.58573	6.32632	6.26666	6.28991
CSNK2A1	2.3219	1.2153	8.6021	7.3868	7.99445	32.2781	6.65084e-22	2.30781e-20	8.62352	8.61131	8.57146	7.41325	7.37997	7.36718
GOLT1B	2.45853	1.29779	8.26584	6.96808	7.61696	32.2296	6.89986e-22	2.38281e-20	8.27579	8.27401	8.2477	6.99818	6.89685	7.00919
ID3	2.94571	1.55862	7.77798	6.21974	6.99886	32.18	7.16463e-22	2.46123e-20	7.86924	7.80861	7.6561	6.17943	6.2196	6.26018
ZNF12	2.88694	1.52954	7.35713	5.82759	6.59236	32.1453	7.35602e-22	2.51399e-20	7.36288	7.38623	7.32229	5.9071	5.71139	5.86427
CTGF	2.89587	1.53399	10.9709	9.43713	10.204	32.1442	7.36219e-22	2.51399e-20	11.0599	11.0506	10.8021	9.43897	9.43079	9.44165
GCC1	3.04164	1.60485	6.89743	5.29298	6.0952	32.1422	7.37309e-22	2.51399e-20	6.95224	6.95431	6.78575	5.29965	5.29244	5.28684
NR2F2	2.49899	1.32135	8.01019	6.68877	7.34948	32.1357	7.40949e-22	2.52014e-20	8.03892	7.99955	7.99208	6.74584	6.62439	6.69608
PRNP	2.26051	1.17665	9.48862	8.31204	8.90033	32.1226	7.48399e-22	2.5392e-20	9.49293	9.51964	9.4533	8.33598	8.27437	8.32577
CD274	3.77264	1.91558	5.75903	3.84402	4.80152	32.1106	7.5523e-22	2.55606e-20	5.77628	5.79813	5.70269	3.8575	3.74089	3.93366
TRA2B	2.46453	1.30131	8.83545	7.53432	8.18489	32.0569	7.86754e-22	2.6497e-20	8.86439	8.88681	8.75513	7.53843	7.50053	7.56402
RBBP5	2.683	1.42385	6.77075	5.34671	6.05873	31.9881	8.29167e-22	2.76543e-20	6.75506	6.7536	6.80358	5.35137	5.36235	5.32642
SCAF8	2.62069	1.38995	7.29901	5.90904	6.60402	31.969	8.41373e-22	2.79259e-20	7.30366	7.33159	7.26179	5.96969	5.86973	5.88768
CLP1	3.41982	1.77392	6.23648	4.46297	5.34973	31.9519	8.52444e-22	2.82251e-20	6.23612	6.32682	6.14649	4.47241	4.50913	4.40738
GOPC	2.51189	1.32877	8.18727	6.85837	7.52282	31.9134	8.77933e-22	2.89992e-20	8.15845	8.21486	8.18851	6.94037	6.81209	6.82265
SDC2	2.41367	1.27123	9.67256	8.4014	9.03698	31.9005	8.86641e-22	2.92166e-20	9.71184	9.69068	9.61516	8.44731	8.32334	8.43355
SPIN1	2.52868	1.33839	7.93392	6.59548	7.2647	31.8902	8.9363e-22	2.93765e-20	7.9487	7.92984	7.92322	6.65414	6.51414	6.61815
FZD8	4.04334	2.01555	5.82203	3.80734	4.81469	31.8456	9.24754e-22	3.02094e-20	5.87202	5.86947	5.72461	3.7139	3.92659	3.78154
PPP2R2A	2.55132	1.35125	7.35162	6.0002	6.67591	31.8413	9.27762e-22	3.02094e-20	7.35578	7.34214	7.35695	6.05923	5.95254	5.98882
DOHH	3.38953	1.76109	5.83421	4.07351	4.95386	31.7946	9.61633e-22	3.11958e-20	5.88952	5.81221	5.8009	4.01324	4.09294	4.11435
ZCCHC3	2.68563	1.42526	7.82308	6.39813	7.1106	31.789	9.65786e-22	3.11958e-20	7.85846	7.89018	7.72058	6.38343	6.39214	6.41882
HNRNPA1	2.3548	1.23561	9.20696	7.97144	8.5892	31.7401	1.0028e-21	3.22704e-20	9.20671	9.26576	9.1484	8.00392	7.97484	7.93555
MIER3	3.27007	1.70932	6.88664	5.17752	6.03208	31.7062	1.02933e-21	3.2893e-20	6.863	6.97533	6.82159	5.26464	5.05501	5.2129
TTC30A	4.3692	2.12737	5.17776	3.04976	4.11376	31.6623	1.06471e-21	3.38661e-20	5.14877	5.17915	5.20537	3.08157	3.12673	2.94096
TAF7	2.51768	1.3321	8.40194	7.07006	7.736	31.6498	1.07509e-21	3.41173e-20	8.45155	8.42118	8.3331	7.04418	7.03001	7.13599
DKK1	2.43896	1.28627	8.24842	6.96224	7.60533	31.6008	1.11655e-21	3.52157e-20	8.27666	8.23475	8.23386	6.95442	6.9024	7.02989
CEP85L	3.47299	1.79618	6.08965	4.29421	5.19193	31.5998	1.11739e-21	3.52157e-20	6.07985	6.16244	6.02665	4.28662	4.20834	4.38766
WBP1L	2.51687	1.33163	7.41764	6.08605	6.75184	31.5889	1.1268e-21	3.54311e-20	7.44879	7.42571	7.37841	6.11791	6.04191	6.09834
IP6K1	3.01419	1.59177	6.12644	4.53453	5.33048	31.5416	1.16885e-21	3.65858e-20	6.1579	6.07687	6.14454	4.51501	4.542	4.54659
C5orf51	2.57519	1.36468	7.36746	6.00253	6.68499	31.5096	1.1981e-21	3.73313e-20	7.36206	7.3561	7.38421	6.07585	5.94846	5.98327
MLLT11	2.65034	1.40618	6.967	5.56112	6.26406	31.455	1.25001e-21	3.87474e-20	7.0066	6.97984	6.91456	5.52815	5.56383	5.59138
USP42	2.89812	1.53512	6.48034	4.94526	5.7128	31.4529	1.25201e-21	3.87474e-20	6.52417	6.46945	6.44741	4.97978	4.87754	4.97846
TWISTNB	2.99406	1.5821	7.27159	5.68955	6.48057	31.4465	1.25827e-21	3.88537e-20	7.26512	7.28577	7.26389	5.74857	5.54233	5.77775
UIMC1	3.08366	1.62465	6.06164	4.4373	5.24947	31.4276	1.27686e-21	3.93393e-20	6.06251	6.11209	6.01032	4.43712	4.45838	4.41639
MKI67IP	2.72004	1.44363	7.02343	5.57986	6.30165	31.3997	1.30485e-21	4.00221e-20	7.05055	7.0627	6.95704	5.63542	5.55312	5.55103
DCBLD2	2.63689	1.39884	8.61139	7.21237	7.91188	31.394	1.31058e-21	4.01083e-20	8.60094	8.58989	8.64332	7.3111	7.09928	7.22674
ZNF324	5.57476	2.47891	5.06709	2.58963	3.82836	31.3475	1.35895e-21	4.13311e-20	5.10123	5.14616	4.95389	2.48283	2.6917	2.59436
ZNF623	2.99764	1.58383	6.71943	5.13526	5.92734	31.3207	1.38753e-21	4.20884e-20	6.74046	6.70787	6.70996	5.24519	5.03109	5.1295
ZCCHC8	2.90372	1.5379	6.30381	4.76615	5.53498	31.2962	1.41433e-21	4.26908e-20	6.32828	6.30927	6.27389	4.76546	4.7153	4.8177
DDX20	2.95887	1.56505	6.68396	5.11945	5.90171	31.2912	1.41982e-21	4.26908e-20	6.66999	6.77534	6.60654	5.09296	5.1469	5.1185
IGFBP7	2.56768	1.36046	7.57772	6.21746	6.89759	31.2821	1.43e-21	4.29032e-20	7.60019	7.56532	7.56765	6.13122	6.27523	6.24593
KLF3	2.7525	1.46074	6.73784	5.277	6.00742	31.2791	1.43328e-21	4.29078e-20	6.74004	6.7062	6.76728	5.29177	5.20962	5.32961
SMURF2	2.36983	1.24479	8.3859	7.14103	7.76347	31.2699	1.44364e-21	4.31059e-20	8.36431	8.36959	8.42381	7.1744	7.08099	7.1677
DUSP4	3.0579	1.61254	5.99173	4.37898	5.18536	31.2677	1.44617e-21	4.31059e-20	5.97612	5.98521	6.01388	4.41842	4.32782	4.39071
SMN1	3.19047	1.67377	5.81396	4.14032	4.97714	31.2113	1.51122e-21	4.48504e-20	5.78931	5.82307	5.82951	4.13629	4.09478	4.18987
TXNIP	2.46196	1.29981	7.83983	6.54012	7.18997	31.2008	1.52371e-21	4.49474e-20	7.86078	7.816	7.8427	6.51585	6.49188	6.61261
ARPP19	2.54372	1.34694	7.89939	6.55238	7.22589	31.2003	1.52431e-21	4.49474e-20	7.89941	7.90541	7.89333	6.6215	6.45676	6.57889
PPP4R2	2.64763	1.4047	7.05792	5.65325	6.35559	31.1721	1.55837e-21	4.58535e-20	7.04445	7.07314	7.05617	5.68801	5.57181	5.69993
SLC20A1	2.49537	1.31925	7.58753	6.26827	6.9279	31.0891	1.6631e-21	4.83142e-20	7.58089	7.63214	7.54958	6.30729	6.287	6.21053
ZBTB21	3.23355	1.69312	6.4205	4.72741	5.57395	31.0644	1.69565e-21	4.91558e-20	6.44866	6.45854	6.35428	4.82565	4.61332	4.74325
TP73-AS1	2.66125	1.4121	6.62712	5.21507	5.92109	30.951	1.85394e-21	5.36316e-20	6.62528	6.64717	6.6089	5.20798	5.25658	5.18065
CHD2	2.34056	1.22685	8.05877	6.83182	7.4453	30.917	1.90419e-21	5.49695e-20	8.06326	8.04732	8.06574	6.88094	6.78203	6.8325
LRP12	3.03452	1.60147	7.55422	5.95269	6.75345	30.895	1.93759e-21	5.58164e-20	7.59092	7.5862	7.48553	6.07539	5.81364	5.96905
SALL2	2.82631	1.49892	6.52478	5.02603	5.77541	30.8886	1.9474e-21	5.59816e-20	6.55882	6.56128	6.45425	5.05807	5.02141	4.9986
DIDO1	2.2867	1.19327	8.11354	6.92023	7.51689	30.82	2.05596e-21	5.88562e-20	8.13727	8.086	8.11737	6.93431	6.89128	6.93509
CPM	5.65162	2.49867	4.93011	2.4309	3.6805	30.7959	2.0956e-21	5.98661e-20	4.84614	4.94066	5.00352	2.52109	2.27584	2.49577
C10orf12	4.70901	2.23542	5.06132	2.82505	3.94319	30.7816	2.11944e-21	6.03418e-20	5.08811	5.02506	5.0708	2.95953	2.6917	2.82392
C17orf104	9.32461	3.22104	4.32706	1.10494	2.716	30.7806	2.12103e-21	6.03418e-20	4.3463	4.30014	4.33474	1.17879	1.16416	0.971855
FJX1	2.52172	1.33441	6.90323	5.56897	6.2361	30.7593	2.15711e-21	6.12415e-20	6.91296	6.91496	6.88176	5.56589	5.54301	5.598
PPP2CA	2.30446	1.20443	8.14311	6.93883	7.54097	30.7411	2.18855e-21	6.2006e-20	8.15295	8.16998	8.10639	6.91212	6.93138	6.973
PPP1R3B	3.59468	1.84586	5.80647	3.9605	4.88348	30.7266	2.21395e-21	6.25963e-20	5.84263	5.85215	5.72461	4.06779	3.92035	3.89334
FOXP1	3.06418	1.6155	5.8903	4.27472	5.08251	30.7181	2.22886e-21	6.28886e-20	5.86434	5.87097	5.93558	4.24967	4.27177	4.30272
PPP1R18	2.6304	1.39528	7.44182	6.04684	6.74433	30.6977	2.26528e-21	6.37854e-20	7.46741	7.4777	7.38035	5.97905	6.1256	6.03587
TANC1	2.44068	1.28729	7.71918	6.43174	7.07546	30.6181	2.41323e-21	6.76272e-20	7.69563	7.71132	7.7506	6.48819	6.3656	6.44144
TSPYL1	2.73343	1.45071	6.55652	5.10584	5.83118	30.6164	2.41649e-21	6.76272e-20	6.55453	6.60013	6.5149	5.15596	5.0832	5.07837
SRSF4	2.61588	1.3873	7.196	5.80868	6.50234	30.611	2.42701e-21	6.77837e-20	7.24309	7.2077	7.1372	5.833	5.85128	5.74176
CASP2	2.36348	1.24091	7.85775	6.61667	7.23721	30.5962	2.4558e-21	6.84485e-20	7.88298	7.81114	7.87913	6.62715	6.64566	6.57722
CTB-89H12.4	3.28262	1.71485	5.53245	3.81731	4.67488	30.5905	2.46689e-21	6.86186e-20	5.5346	5.51872	5.54404	3.84032	3.83009	3.78154
TIMP1	2.48284	1.31199	8.72725	7.41543	8.07134	30.5335	2.58164e-21	7.15208e-20	8.80398	8.75568	8.6221	7.41271	7.43442	7.39916
USP53	2.72647	1.44704	6.62034	5.173	5.89667	30.5103	2.62999e-21	7.27138e-20	6.60423	6.60239	6.65439	5.23124	5.10536	5.18241
USP38	2.98333	1.57692	6.19795	4.62099	5.40947	30.4853	2.68307e-21	7.38838e-20	6.21636	6.19506	6.18242	4.67383	4.52566	4.66349
ZNF639	2.99165	1.58094	6.53629	4.95557	5.74593	30.4716	2.71262e-21	7.45482e-20	6.55977	6.55245	6.49666	4.99637	4.83617	5.03417
WDR82	2.34324	1.22851	7.84696	6.61835	7.23265	30.4532	2.7529e-21	7.5204e-20	7.87785	7.83242	7.83062	6.66882	6.59468	6.59155
HMGCR	2.61994	1.38953	7.40839	6.01894	6.71367	30.4285	2.80789e-21	7.6554e-20	7.44004	7.44968	7.33545	6.08454	5.95356	6.01872
GTF3C4	3.02191	1.59546	6.9187	5.32313	6.12092	30.3894	2.89729e-21	7.83074e-20	6.95766	6.96591	6.83254	5.44247	5.24831	5.27862
MANBA	2.65797	1.41032	6.7071	5.29688	6.00199	30.3879	2.9007e-21	7.83074e-20	6.7509	6.7183	6.6521	5.29965	5.32978	5.26122
BHLHE40	5.07939	2.34466	4.67797	2.33277	3.50537	30.3831	2.91181e-21	7.84534e-20	4.70028	4.6772	4.65644	2.39727	2.35196	2.24908
GRWD1	2.48034	1.31054	7.19121	5.88073	6.53597	30.3783	2.92314e-21	7.86042e-20	7.22252	7.20087	7.15022	5.9143	5.83534	5.89254
FGD4	4.95596	2.30916	5.102	2.79114	3.94657	30.3759	2.92885e-21	7.86042e-20	5.08283	5.05827	5.16489	2.97536	2.68681	2.71126
FOXJ3	2.53744	1.34337	7.21646	5.87283	6.54464	30.3706	2.94126e-21	7.87063e-20	7.22342	7.16595	7.25999	5.91225	5.81532	5.89092
ZNF16	4.28941	2.10078	5.61669	3.51716	4.56693	30.3694	2.94411e-21	7.87063e-20	5.67285	5.70808	5.46913	3.4478	3.58403	3.51966
LSG1	2.48721	1.31453	6.88939	5.57474	6.23207	30.3604	2.96538e-21	7.89675e-20	6.87106	6.89635	6.90076	5.59564	5.5837	5.54488
VCPIP1	2.89704	1.53458	6.02985	4.49503	5.26244	30.3528	2.98351e-21	7.92968e-20	6.01615	6.0341	6.0393	4.52311	4.51742	4.44456
RGS3	3.93939	1.97797	5.31131	3.33412	4.32272	30.3351	3.02638e-21	8.01812e-20	5.33135	5.38479	5.21779	3.311	3.37495	3.31643
NRAS	2.40105	1.26367	8.57441	7.31082	7.94261	30.3338	3.02943e-21	8.01812e-20	8.60291	8.585	8.53532	7.34463	7.22161	7.36621
LOX	2.28775	1.19393	8.49462	7.30069	7.89765	30.3294	3.04013e-21	8.01812e-20	8.46023	8.51914	8.50448	7.332	7.24155	7.32851
UHRF2	2.82827	1.49992	6.92933	5.4293	6.17931	30.3175	3.06947e-21	8.07825e-20	6.88554	6.98331	6.91913	5.52546	5.33448	5.42795
ZSCAN25	2.96984	1.57038	6.91044	5.34052	6.12548	30.313	3.08057e-21	8.07825e-20	6.94352	7.00288	6.78492	5.35365	5.3415	5.32642
IL1B	6.64036	2.73126	4.80673	2.07663	3.44168	30.3098	3.08853e-21	8.08371e-20	4.85081	4.9002	4.66916	2.03134	2.17468	2.02389
TOMM20	2.16139	1.11196	8.70547	7.59351	8.14949	30.2916	3.13385e-21	8.18673e-20	8.70485	8.7097	8.70186	7.60974	7.5699	7.60088
HIAT1	2.94102	1.55632	7.15187	5.59562	6.37375	30.2892	3.14e-21	8.18724e-20	7.17367	7.18352	7.09843	5.68139	5.45371	5.65177
WASL	2.47519	1.30754	7.46948	6.16188	6.81568	30.2754	3.17509e-21	8.26305e-20	7.48678	7.46413	7.45753	6.21571	6.08204	6.1879
KIAA0247	3.46241	1.79178	6.13647	4.34555	5.24101	30.2484	3.24497e-21	8.42894e-20	6.17662	6.22462	6.00817	4.35327	4.28962	4.39375
ZNF264	5.43719	2.44286	5.29149	2.84811	4.0698	30.1805	3.42758e-21	8.85308e-20	5.28034	5.36156	5.23256	3.07056	2.63189	2.84187
TGFBR1	2.3316	1.22132	8.68717	7.46581	8.07649	30.1768	3.43772e-21	8.86261e-20	8.70313	8.68567	8.67272	7.53325	7.38489	7.47929
ZNF614	3.5341	1.82134	6.56038	4.73928	5.64983	30.1711	3.45358e-21	8.88683e-20	6.57066	6.6463	6.46419	4.85483	4.58206	4.78096
TIMM17A	2.27056	1.18305	7.85573	6.6728	7.26426	30.1466	3.52261e-21	9.02149e-20	7.8349	7.8852	7.8471	6.65076	6.67928	6.68835
RBM18	2.94549	1.55851	6.0759	4.51759	5.29675	30.1325	3.56308e-21	9.10043e-20	6.09107	6.09874	6.0379	4.54979	4.44685	4.55614
RANBP6	3.05111	1.60933	6.84599	5.23708	6.04153	30.1286	3.57411e-21	9.11166e-20	6.85991	6.91714	6.76093	5.28543	5.1154	5.3104
CKAP4	2.20021	1.13764	9.73042	8.59293	9.16167	30.1159	3.6111e-21	9.18345e-20	9.76161	9.77231	9.65733	8.57959	8.58875	8.61044
SMCR8	3.6342	1.86164	5.92015	4.05878	4.98947	30.1073	3.63646e-21	9.20456e-20	5.93933	6.01528	5.80584	4.14856	4.02868	3.9991
PHAX	2.6524	1.4073	7.22759	5.82063	6.52411	30.1052	3.64245e-21	9.20456e-20	7.26279	7.26686	7.15313	5.82647	5.74883	5.8866
ARID4B	2.48436	1.31288	7.22724	5.91435	6.5708	30.1047	3.64405e-21	9.20456e-20	7.23597	7.22564	7.22011	5.9523	5.83866	5.95211
CNOT8	2.53048	1.33941	6.81979	5.48013	6.14996	30.0884	3.69225e-21	9.27518e-20	6.8192	6.79478	6.8454	5.5221	5.44215	5.47615
ZNF440	3.29211	1.71901	5.53421	3.81553	4.67487	30.0701	3.74743e-21	9.39662e-20	5.57278	5.5452	5.48463	3.81634	3.78503	3.84521
LAMC1	2.17931	1.12387	10.7382	9.61438	10.1763	30.0588	3.78188e-21	9.46572e-20	10.7813	10.7617	10.6716	9.66595	9.57005	9.60715
ZNF646	2.96662	1.56882	6.61021	5.04177	5.82599	30.0463	3.82055e-21	9.53109e-20	6.65894	6.67656	6.49513	5.05993	5.0588	5.00658
SMAD7	3.34596	1.74242	6.09992	4.35774	5.22883	30.0459	3.82187e-21	9.53109e-20	6.18465	6.13219	5.98293	4.4024	4.36809	4.30272
ZNF791	2.90379	1.53793	6.20339	4.66556	5.43448	30.0012	3.96275e-21	9.84668e-20	6.22597	6.23511	6.14909	4.72389	4.60427	4.66853
KANSL1	2.66123	1.41209	6.50035	5.08842	5.79438	29.9963	3.97866e-21	9.85309e-20	6.50898	6.518	6.47406	5.1074	5.03109	5.12676
YTHDF3	2.5225	1.33485	8.35397	7.01907	7.68652	29.996	3.97967e-21	9.85309e-20	8.37879	8.36853	8.31457	7.11222	6.91265	7.03234
ASXL2	2.70986	1.43822	7.5646	6.12615	6.84538	29.9345	4.18344e-21	1.03019e-19	7.57525	7.56162	7.55693	6.24539	6.00653	6.12653
RREB1	2.88867	1.5304	6.24137	4.71071	5.47604	29.8959	4.31725e-21	1.05935e-19	6.27717	6.24438	6.20256	4.79364	4.68005	4.65843
BTN2A1	2.49772	1.32061	6.81928	5.49874	6.15901	29.8816	4.36753e-21	1.06787e-19	6.86068	6.81474	6.78241	5.50379	5.49206	5.50037
RUSC2	2.70417	1.43519	7.04943	5.61444	6.33194	29.8696	4.41067e-21	1.0765e-19	7.11924	7.06204	6.96701	5.59436	5.68098	5.56798
RNF168	3.07763	1.62182	5.83758	4.21588	5.02673	29.8337	4.54156e-21	1.10648e-19	5.83086	5.87768	5.8042	4.27067	4.14735	4.22962
CBX4	2.8282	1.49988	6.29347	4.79377	5.54362	29.8193	4.59537e-21	1.11761e-19	6.3581	6.27182	6.2505	4.79364	4.74971	4.83796
SMAD4	2.47466	1.30723	6.90352	5.59609	6.2498	29.7781	4.75269e-21	1.15066e-19	6.90513	6.86816	6.93727	5.61788	5.56383	5.60655
SH2B3	2.82125	1.49633	6.12156	4.62535	5.37345	29.7772	4.75639e-21	1.15066e-19	6.17786	6.10002	6.0868	4.61314	4.62487	4.63803
CYTH2	2.71535	1.44114	6.54225	5.10155	5.8219	29.7547	4.84443e-21	1.1658e-19	6.58334	6.54778	6.49564	5.03087	5.14155	5.13224
RSL1D1	2.16339	1.11329	9.02806	7.91481	8.47144	29.7026	5.05551e-21	1.21235e-19	9.05642	9.03364	8.99412	7.90083	7.9568	7.88681
NSD1	2.47171	1.30551	8.02942	6.72386	7.37664	29.6929	5.09624e-21	1.21839e-19	8.04335	8.05934	7.98556	6.8173	6.64376	6.7105
TRIL	2.99081	1.58053	6.16186	4.58149	5.37167	29.683	5.13771e-21	1.22565e-19	6.22417	6.17461	6.0868	4.63324	4.52017	4.59105
PDIA3	2.03598	1.02572	9.76082	8.73512	9.24797	29.6802	5.14938e-21	1.2263e-19	9.77129	9.7675	9.74366	8.73363	8.73428	8.73746
BAG3	2.55225	1.35177	6.61498	5.26315	5.93906	29.6779	5.15928e-21	1.22654e-19	6.628	6.62606	6.59087	5.30749	5.23329	5.24866
CEP170	2.63019	1.39517	8.34014	6.94475	7.64244	29.6707	5.18981e-21	1.23166e-19	8.30529	8.34302	8.3721	7.06906	6.82801	6.93718
CDK17	3.05493	1.61114	6.37165	4.76028	5.56596	29.6584	5.2422e-21	1.24195e-19	6.40118	6.36343	6.35034	4.86549	4.62743	4.78792
CASP8AP2	2.4732	1.30638	6.97768	5.6714	6.32454	29.6325	5.35505e-21	1.26216e-19	6.93255	7.01883	6.98165	5.6832	5.63538	5.69562
EID1	2.2344	1.15989	8.74029	7.58053	8.16041	29.6108	5.4515e-21	1.28269e-19	8.76772	8.77279	8.68037	7.59027	7.54174	7.60958
ASB6	3.5886	1.84342	5.74575	3.90314	4.82444	29.592	5.53621e-21	1.29817e-19	5.76972	5.8161	5.65141	3.82729	4.01704	3.8651
AKAP8	2.51426	1.33013	6.91686	5.58702	6.25194	29.5779	5.60059e-21	1.31103e-19	6.91779	6.97463	6.85816	5.57955	5.59745	5.58407
LA16c-358B7.3	6.36261	2.66962	4.43625	1.76553	3.10089	29.5627	5.67131e-21	1.32308e-19	4.4909	4.39679	4.42106	1.86283	1.7747	1.65907
ZBTB6	4.36476	2.1259	5.39683	3.27103	4.33393	29.4807	6.06791e-21	1.41081e-19	5.37846	5.47216	5.33987	3.40752	3.08273	3.32283
BICD2	2.80193	1.48642	6.44313	4.95673	5.69993	29.4784	6.07917e-21	1.41105e-19	6.49911	6.45755	6.37273	5.02041	4.90727	4.94252
ZFHX3	2.79046	1.4805	6.73727	5.25688	5.99707	29.4668	6.13798e-21	1.42229e-19	6.73878	6.78925	6.68379	5.33383	5.15489	5.28192
MED13	2.5877	1.37167	7.48598	6.11414	6.80006	29.4527	6.20987e-21	1.43411e-19	7.4669	7.48968	7.50137	6.20526	6.00013	6.13702
APC	2.45571	1.29614	7.21587	5.91958	6.56772	29.4489	6.22951e-21	1.43624e-19	7.21621	7.20206	7.22934	5.97659	5.84196	5.94018
SNRPB	2.47532	1.30762	8.55696	7.24963	7.9033	29.4102	6.43198e-21	1.48043e-19	8.62613	8.59465	8.45011	7.19335	7.27167	7.28387
CDKN1A	2.24542	1.16698	8.07193	6.90507	7.4885	29.4018	6.47689e-21	1.48828e-19	8.11367	8.07857	8.02355	6.8791	6.91996	6.91616
PPP1R15A	2.44994	1.29275	8.69568	7.40306	8.04937	29.3825	6.58092e-21	1.50966e-19	8.75283	8.72136	8.61284	7.37067	7.49004	7.34846
VOPP1	2.36094	1.23936	7.71644	6.4773	7.09687	29.3561	6.72655e-21	1.54049e-19	7.74203	7.75188	7.65542	6.43765	6.52548	6.46877
NAB2	2.98567	1.57805	6.14879	4.57086	5.35983	29.3057	7.01362e-21	1.60356e-19	6.24561	6.1228	6.07797	4.59019	4.542	4.5804
CCDC12	3.76429	1.91238	5.73973	3.8281	4.78392	29.2983	7.05661e-21	1.60712e-19	5.82692	5.79498	5.5973	3.80088	3.89725	3.78618
GFOD2	2.98058	1.57559	5.78287	4.20732	4.9951	29.297	7.06428e-21	1.60712e-19	5.81741	5.78072	5.75049	4.19832	4.26029	4.16335
KDM2A	2.26623	1.18029	7.71959	6.53921	7.1294	29.2871	7.12296e-21	1.61779e-19	7.70662	7.72027	7.73188	6.54233	6.58255	6.49276
MMP2	2.2142	1.14679	8.94176	7.79503	8.3684	29.2797	7.16661e-21	1.62468e-19	9.01073	8.92089	8.89367	7.77419	7.82349	7.78741
COL4A2	2.13019	1.09098	11.0655	9.97463	10.5201	29.2548	7.3168e-21	1.65362e-19	11.1296	11.0868	10.9802	9.9805	9.98345	9.95995
PLK3	5.55646	2.47416	5.24551	2.77243	4.00897	29.2402	7.4061e-21	1.66831e-19	5.35016	5.33904	5.04732	2.79085	2.78618	2.74026
CRKL	2.30983	1.20778	8.00637	6.79862	7.4025	29.2036	7.63521e-21	1.7143e-19	8.03431	8.04218	7.94262	6.84557	6.78145	6.76884
ZBTB5	2.8215	1.49646	6.31603	4.8197	5.56786	29.181	7.78036e-21	1.73837e-19	6.34768	6.35597	6.24444	4.88448	4.76487	4.80974
CINP	3.07888	1.6224	5.70847	4.08594	4.89721	29.179	7.79324e-21	1.73842e-19	5.74986	5.70053	5.67503	4.14856	4.02287	4.08639
PCDHB16	3.3238	1.73283	5.42745	3.69495	4.5612	29.1484	7.99453e-21	1.78044e-19	5.47537	5.45131	5.35569	3.71626	3.67327	3.69531
KBTBD4	4.1456	2.05158	5.15173	3.10139	4.12656	29.128	8.13201e-21	1.80812e-19	5.18002	5.22783	5.04732	3.01802	3.17642	3.10973
PPM1A	2.42779	1.27964	7.62062	6.34111	6.98087	29.0643	8.57608e-21	1.90378e-19	7.62357	7.68307	7.55522	6.39009	6.28214	6.35111
ZNF622	2.72179	1.44456	6.49298	5.0486	5.77079	29.046	8.70835e-21	1.93002e-19	6.51046	6.55198	6.41649	5.09114	5.05406	5.0006
SGK1	2.72799	1.44784	7.06373	5.61644	6.34009	29.04	8.75218e-21	1.93661e-19	7.10107	7.14012	6.94999	5.60458	5.57843	5.66633
CDH13	2.17394	1.12031	9.06946	7.94917	8.50931	29.0281	8.84045e-21	1.95132e-19	9.12234	9.06438	9.02165	7.98462	7.90904	7.95385
ARL5B	2.64599	1.40381	7.99782	6.59407	7.29594	28.9957	9.08359e-21	1.99389e-19	8.00232	8.04218	7.94896	6.67913	6.45497	6.64811
VEGFC	2.49305	1.31791	6.82387	5.50613	6.165	28.9777	9.22127e-21	2.01766e-19	6.85721	6.85688	6.75753	5.52613	5.50253	5.48974
CUL3	2.17918	1.12378	7.90238	6.77859	7.34048	28.9759	9.2359e-21	2.01766e-19	7.91269	7.90596	7.88848	6.80074	6.75161	6.78342
NCOA6	2.24946	1.16958	7.66074	6.49105	7.0759	28.946	9.46995e-21	2.06223e-19	7.69065	7.64531	7.64625	6.52058	6.50271	6.44988
ZNF432	3.64104	1.86435	5.38967	3.52586	4.45777	28.8829	9.98637e-21	2.16782e-19	5.39773	5.46128	5.31001	3.58311	3.42279	3.57168
COL18A1	2.32273	1.21582	9.1576	7.94192	8.54976	28.8735	1.00651e-20	2.18147e-19	9.24918	9.14952	9.07409	7.89953	7.97559	7.95062
KAT6A	2.4266	1.27894	7.72454	6.44559	7.08507	28.8442	1.03168e-20	2.23249e-19	7.73531	7.75957	7.67874	6.52765	6.36292	6.44621
MED17	2.4174	1.27345	6.78319	5.50972	6.14645	28.8098	1.06206e-20	2.291e-19	6.81562	6.7841	6.74985	5.53551	5.50462	5.48902
RAPGEF2	2.91711	1.54454	7.42007	5.8755	6.64778	28.7988	1.07191e-20	2.30864e-19	7.44391	7.49114	7.32516	6.01204	5.76342	5.85104
KMT2C	2.55394	1.35273	7.83362	6.48049	7.15705	28.7339	1.13237e-20	2.42367e-19	7.81393	7.76903	7.9179	6.5716	6.40037	6.46949
LUZP1	2.34964	1.23244	7.94927	6.71694	7.3331	28.7087	1.15674e-20	2.46812e-19	7.99038	7.98477	7.87266	6.76076	6.66226	6.7278
WAPAL	2.49033	1.31634	7.60661	6.29015	6.94838	28.6929	1.17237e-20	2.49761e-19	7.6367	7.60677	7.57635	6.38566	6.18837	6.29643
AMOTL2	2.40444	1.2657	8.85591	7.59043	8.22317	28.6803	1.18492e-20	2.52043e-19	8.92228	8.91101	8.73443	7.58899	7.60985	7.57244
SDPR	2.81585	1.49357	6.61999	5.12683	5.87341	28.6761	1.18915e-20	2.52552e-19	6.6585	6.69821	6.50327	5.14987	5.13439	5.09624
FNIP1	2.77349	1.4717	6.69234	5.21991	5.95613	28.6226	1.24428e-20	2.63041e-19	6.66293	6.62251	6.79158	5.29256	5.17337	5.19381
RAP2B	2.91972	1.54583	6.61703	5.0716	5.84431	28.6096	1.25811e-20	2.65462e-19	6.7078	6.65891	6.48438	5.09023	5.07293	5.05163
TARDBP	2.13522	1.09438	8.6346	7.5402	8.0874	28.5987	1.26986e-20	2.66143e-19	8.5991	8.64821	8.6565	7.56483	7.4953	7.56046
MAP2K4	2.48376	1.31252	6.56562	5.2531	5.90936	28.598	1.27057e-20	2.66143e-19	6.58334	6.58608	6.52742	5.29019	5.24249	5.22663
RRM2B	2.91845	1.5452	7.87905	6.33373	7.10639	28.5662	1.30535e-20	2.73011e-19	7.88336	7.90249	7.8513	6.46979	6.14891	6.38249
THAP1	3.34014	1.73991	5.34277	3.60313	4.47295	28.5258	1.35103e-20	2.81708e-19	5.37414	5.3806	5.27359	3.65368	3.55212	3.6036
SH3BP4	2.16691	1.11564	8.42642	7.31083	7.86862	28.5131	1.36571e-20	2.83906e-19	8.4423	8.46221	8.37474	7.34539	7.30036	7.28674
PHRF1	2.43428	1.28349	6.88293	5.59928	6.2411	28.4966	1.3851e-20	2.87068e-19	6.90176	6.82674	6.92027	5.56589	5.63792	5.59403
TMED10	2.01215	1.00874	9.80347	8.79479	9.29913	28.4334	1.46177e-20	3.02049e-19	9.82126	9.82402	9.76514	8.80818	8.77091	8.80528
ITGA1	2.18735	1.12919	9.28868	8.15947	8.72407	28.4304	1.46558e-20	3.02379e-19	9.26887	9.30551	9.29166	8.22199	8.0724	8.184
ZNF180	2.96345	1.56728	5.78549	4.21889	5.00219	28.4172	1.48215e-20	3.05341e-19	5.75734	5.83078	5.76834	4.15031	4.21175	4.2946
SETD2	2.22775	1.15559	7.4702	6.31456	6.89238	28.4104	1.49086e-20	3.06373e-19	7.44956	7.45867	7.50238	6.32014	6.28659	6.33694
GJC1	2.40426	1.26559	6.98096	5.71531	6.34813	28.4098	1.49162e-20	3.06373e-19	6.96987	7.00969	6.96333	5.7799	5.66179	5.70423
ZFYVE20	2.92547	1.54867	5.86753	4.31924	5.09339	28.3961	1.50917e-20	3.09054e-19	5.91575	5.90423	5.78262	4.33651	4.31202	4.30919
KMT2E	2.48889	1.3155	8.08957	6.77376	7.43167	28.381	1.52875e-20	3.12598e-19	8.06209	8.04068	8.16593	6.86536	6.67774	6.77819
SESN1	2.66081	1.41186	6.10855	4.69644	5.40249	28.3746	1.5371e-20	3.13837e-19	6.12295	6.09106	6.11164	4.74944	4.64518	4.69469
POLR2B	2.1338	1.09343	8.41292	7.31945	7.86619	28.3683	1.5454e-20	3.14944e-19	8.42831	8.41029	8.40017	7.36787	7.27717	7.31331
NKX2-5	2.88313	1.52764	6.51992	4.99306	5.75649	28.3671	1.5471e-20	3.14944e-19	6.59545	6.55756	6.40676	4.92071	5.02529	5.03319
HNRNPDL	2.0383	1.02736	9.46677	8.43945	8.95311	28.3366	1.58801e-20	3.22795e-19	9.49112	9.48709	9.4221	8.45818	8.43628	8.4239
PPIB	2.13046	1.09117	8.61505	7.524	8.06953	28.3287	1.59883e-20	3.24035e-19	8.62998	8.6493	8.56589	7.50746	7.5574	7.50715
FGF7	3.08237	1.62404	5.86808	4.24385	5.05597	28.3169	1.61498e-20	3.26826e-19	5.81582	5.89249	5.89594	4.3211	4.12402	4.28643
ZNF555	3.56022	1.83196	5.21908	3.38718	4.30313	28.296	1.64419e-20	3.31952e-19	5.2606	5.23946	5.15717	3.46752	3.29043	3.40361
AC010761.8	6.6687	2.73741	4.61698	1.87992	3.24845	28.2662	1.68677e-20	3.38859e-19	4.64579	4.72927	4.47587	1.94553	1.95636	1.73787
SBNO1	2.63857	1.39975	7.09445	5.69419	6.39432	28.2557	1.70218e-20	3.41454e-19	7.06167	7.06532	7.15636	5.8067	5.602	5.67386
MOK	4.83545	2.27365	4.68392	2.41176	3.54784	28.248	1.71337e-20	3.42775e-19	4.70028	4.68232	4.66916	2.23577	2.4591	2.54042
KCTD10	2.22891	1.15634	7.28537	6.12904	6.7072	28.2478	1.71375e-20	3.42775e-19	7.31525	7.26743	7.27344	6.12901	6.12063	6.13747
ADM	2.71556	1.44125	9.78765	8.34677	9.06721	28.2387	1.72723e-20	3.44969e-19	9.81569	9.92023	9.62703	8.29813	8.40954	8.33263
NF2	2.11679	1.08188	8.07153	6.98968	7.53061	28.2125	1.76646e-20	3.51272e-19	8.0987	8.06032	8.05557	6.97475	7.00812	6.98617
TAF1A	3.18613	1.6718	5.6703	3.99877	4.83453	28.2098	1.77061e-20	3.51589e-19	5.74819	5.64652	5.61619	4.01516	3.9099	4.07125
RNF145	2.22939	1.15665	7.50174	6.34495	6.92335	28.1868	1.80606e-20	3.58002e-19	7.5128	7.49793	7.49449	6.39892	6.32172	6.31422
ZNF707	3.25723	1.70365	5.55428	3.85025	4.70226	28.1675	1.83634e-20	3.63067e-19	5.58778	5.54988	5.52518	3.88919	3.93692	3.72463
SRRT	2.25729	1.17459	8.77545	7.60081	8.18813	28.1593	1.84933e-20	3.65111e-19	8.81109	8.74236	8.77292	7.57054	7.69482	7.53707
KTI12	3.71691	1.8941	4.91911	3.02581	3.97246	28.1399	1.88047e-20	3.70194e-19	4.92057	4.97167	4.86508	2.99102	3.01801	3.0684
LATS2	2.60704	1.38241	7.50712	6.1249	6.81601	28.1362	1.88646e-20	3.70842e-19	7.56818	7.56348	7.38971	6.19134	6.06187	6.12149
PHC2	2.44507	1.28987	7.08173	5.79202	6.43687	28.1321	1.89322e-20	3.71639e-19	7.13176	7.05482	7.05859	5.72067	5.86487	5.79052
ASB5	2.05509	1.0392	9.80343	8.76423	9.28383	28.121	1.91145e-20	3.74325e-19	9.78599	9.81131	9.813	8.79347	8.69737	8.80185
ZNF513	3.20977	1.68247	5.7848	4.10321	4.94401	28.0755	1.988e-20	3.86928e-19	5.84107	5.83922	5.67413	4.03795	4.17031	4.10137
PTBP2	2.91263	1.54232	5.52211	3.97961	4.75086	28.0697	1.99803e-20	3.88329e-19	5.50331	5.50914	5.55387	3.97438	3.98751	3.97694
SRSF2	2.20116	1.13826	8.19571	7.05756	7.62664	28.0584	2.01767e-20	3.90617e-19	8.24183	8.22	8.1253	7.0533	7.08169	7.0377
PFKFB3	3.31016	1.7269	6.48653	4.76074	5.62364	28.058	2.01832e-20	3.90617e-19	6.54976	6.59607	6.31378	4.71685	4.75906	4.80632
BIRC3	15.1948	3.92551	4.14079	0.216854	2.17882	28.0352	2.05865e-20	3.97301e-19	4.16073	4.23888	4.02276	0.252108	0.0238401	0.374614
THUMPD1	2.77995	1.47506	6.68865	5.21351	5.95108	28.029	2.06958e-20	3.98852e-19	6.68227	6.73893	6.64476	5.33306	5.09801	5.20945
SELK	2.68609	1.42551	5.87117	4.4458	5.15849	28.0254	2.07607e-20	3.99541e-19	5.86895	5.86572	5.87883	4.40971	4.45694	4.47075
ARL8A	2.50878	1.32699	6.38101	5.05417	5.71759	28.0176	2.09014e-20	4.01688e-19	6.41701	6.36502	6.36102	5.04594	5.01752	5.09904
C2orf49	2.56758	1.36041	6.19372	4.83362	5.51367	28.0041	2.1147e-20	4.05538e-19	6.18404	6.24091	6.1562	4.82783	4.83507	4.83796
PAMR1	3.11781	1.64053	5.38887	3.74835	4.56861	27.9961	2.12945e-20	4.07531e-19	5.45404	5.36475	5.3478	3.76033	3.74325	3.74146
SBDS	2.13641	1.09519	8.53018	7.43511	7.98264	27.9942	2.13294e-20	4.07632e-19	8.4947	8.57975	8.51609	7.42933	7.40047	7.47552
RP11-29G8.3	24.5229	4.61606	3.81732	-0.798581	1.50937	27.9615	2.19422e-20	4.1876e-19	3.83911	3.81649	3.79635	-0.709418	-1.02347	-0.662861
SRSF1	2.07143	1.05062	8.87976	7.82913	8.35445	27.9568	2.20327e-20	4.19904e-19	8.88294	8.90061	8.85572	7.8764	7.79919	7.81181
HIPK1	2.50269	1.32348	7.35871	6.03501	6.69686	27.9153	2.28414e-20	4.31937e-19	7.38665	7.36116	7.32831	6.15227	5.94642	6.00633
ZNF134	2.89241	1.53227	5.92303	4.39148	5.15726	27.9124	2.28987e-20	4.31937e-19	5.96036	5.96713	5.8416	4.32883	4.43524	4.41039
NID1	2.1267	1.08862	9.47236	8.38378	8.92807	27.852	2.41344e-20	4.53668e-19	9.49417	9.50893	9.41396	8.44722	8.33989	8.36422
EIF4E	2.62733	1.3936	6.12497	4.73163	5.4283	27.846	2.42609e-20	4.55423e-19	6.11391	6.14338	6.11761	4.72623	4.67265	4.796
FBXO42	3.0162	1.59273	5.74202	4.14942	4.94572	27.8403	2.43816e-20	4.56441e-19	5.81979	5.69039	5.71588	4.08614	4.21854	4.14359
FZD2	2.25409	1.17255	7.83056	6.65816	7.24436	27.8255	2.46968e-20	4.61307e-19	7.89716	7.82375	7.77076	6.64705	6.6295	6.69793
SNIP1	3.2987	1.7219	5.25192	3.5306	4.39126	27.8094	2.50468e-20	4.66352e-19	5.29412	5.2929	5.16873	3.52513	3.53589	3.53077
DDX6	2.53934	1.34445	8.27903	6.93441	7.60672	27.8059	2.51232e-20	4.67141e-19	8.28961	8.26109	8.2864	7.0533	6.78946	6.96048
SREK1IP1	2.6022	1.37973	6.52595	5.14653	5.83624	27.7743	2.58248e-20	4.77714e-19	6.54736	6.57465	6.45582	5.18519	5.07199	5.18241
CTSB	2.0592	1.04208	9.33039	8.28839	8.80939	27.7639	2.60619e-20	4.81339e-19	9.37977	9.34211	9.26931	8.29152	8.29128	8.28238
CRELD2	2.63831	1.39961	6.60719	5.2081	5.90765	27.742	2.6565e-20	4.88801e-19	6.68314	6.62251	6.5159	5.15161	5.22994	5.24276
MOCS3	3.22767	1.69049	5.77369	4.0836	4.92864	27.7417	2.65726e-20	4.88801e-19	5.8512	5.80205	5.6678	4.14156	3.98751	4.12172
DCAF12	2.52569	1.33668	6.49173	5.15504	5.82338	27.7135	2.72354e-20	5.00324e-19	6.53629	6.50313	6.43576	5.21383	5.1154	5.13588
LATS1	2.45108	1.29342	6.84847	5.5548	6.20164	27.709	2.73431e-20	5.01631e-19	6.83774	6.82982	6.87786	5.62166	5.46803	5.57471
ZNFX1	2.36651	1.24276	7.16909	5.92649	6.54779	27.6992	2.75793e-20	5.04618e-19	7.19464	7.20651	7.10614	5.9184	5.98478	5.8763
DNMBP	2.79328	1.48196	5.83315	4.35146	5.09231	27.6663	2.83847e-20	5.18552e-19	5.88801	5.84227	5.76918	4.3411	4.38328	4.33
CCNB1IP1	2.35876	1.23803	7.31177	6.07408	6.69292	27.665	2.84164e-20	5.18552e-19	7.34175	7.37098	7.22258	6.06433	6.07035	6.08757
NEXN	2.16795	1.11633	7.7149	6.59851	7.1567	27.6598	2.85468e-20	5.19552e-19	7.66856	7.7423	7.73383	6.61898	6.60638	6.57017
C1GALT1	2.35158	1.23363	7.69347	6.45985	7.07666	27.6421	2.89936e-20	5.26289e-19	7.65794	7.68583	7.73664	6.46454	6.37133	6.54368
RP1-178F10.3	3.21355	1.68417	5.20831	3.52387	4.36609	27.63	2.93027e-20	5.30498e-19	5.24885	5.19715	5.17893	3.58569	3.5001	3.48582
PHLDA1	2.4608	1.29912	6.90974	5.61009	6.25992	27.5917	3.03034e-20	5.46455e-19	6.91891	6.8719	6.9384	5.6838	5.62647	5.52001
GOLGB1	2.26713	1.18087	7.5488	6.36815	6.95847	27.5592	3.11817e-20	5.60579e-19	7.52136	7.57201	7.55301	6.2888	6.41449	6.40115
GAN	3.34447	1.74178	5.20355	3.4616	4.33257	27.5592	3.11832e-20	5.60579e-19	5.27803	5.17673	5.15588	3.51974	3.41098	3.45408
TFPI	2.07862	1.05563	8.4562	7.40054	7.92837	27.5582	3.1209e-20	5.60579e-19	8.47417	8.45262	8.44179	7.4422	7.3563	7.40313
KB-1208A12.3	7.31565	2.87099	4.41219	1.54247	2.97733	27.5344	3.18718e-20	5.71737e-19	4.41307	4.55408	4.26942	1.56098	1.54538	1.52106
PAFAH1B2	2.14328	1.09982	7.81953	6.71967	7.2696	27.5308	3.19711e-20	5.72771e-19	7.81074	7.83165	7.81619	6.76447	6.67157	6.72296
ZNF445	2.46742	1.303	6.34316	5.03993	5.69154	27.482	3.33764e-20	5.97167e-19	6.33441	6.34416	6.3509	5.09748	4.9989	5.02339
AF131216.6	23.5924	4.56025	4.0773	-0.482297	1.7975	27.4764	3.35405e-20	5.9777e-19	4.01303	4.19894	4.01992	-0.313489	-0.787398	-0.346004
SRGAP1	3.46257	1.79184	5.92388	4.13216	5.02802	27.4644	3.3899e-20	6.01685e-19	5.92538	5.94954	5.89671	4.23166	3.91827	4.24656
ZNF451	2.62808	1.39401	6.53182	5.13741	5.83461	27.4632	3.39354e-20	6.01685e-19	6.47461	6.55989	6.56096	5.24028	5.07011	5.10184
BRD2	2.28045	1.18932	7.95053	6.76141	7.35597	27.4606	3.40123e-20	6.02272e-19	7.95251	8.02582	7.87325	6.74439	6.80872	6.73111
MANF	2.27744	1.18741	7.00781	5.82059	6.4142	27.405	3.57255e-20	6.30172e-19	7.0332	7.02691	6.96333	5.79559	5.85673	5.80946
RIOK3	2.49762	1.32055	7.24074	5.92013	6.58044	27.3964	3.59988e-20	6.33367e-19	7.2543	7.26116	7.20677	6.01635	5.80125	5.94278
ATP6V1G1	2.28574	1.19266	7.48165	6.28926	6.88545	27.3608	3.71505e-20	6.50472e-19	7.51696	7.48626	7.44173	6.25231	6.24644	6.36902
SNRPB2	2.10162	1.0715	8.2888	7.21743	7.75312	27.3448	3.76795e-20	6.58648e-19	8.30671	8.3202	8.2395	7.22018	7.18566	7.24645
IER5	2.42914	1.28045	7.54368	6.2636	6.90364	27.3435	3.77233e-20	6.58648e-19	7.5769	7.61505	7.43908	6.22732	6.32093	6.24255
MAPK7	3.05545	1.61139	6.2741	4.6635	5.4688	27.3383	3.78962e-20	6.60827e-19	6.29441	6.38924	6.13867	4.64319	4.72607	4.62124
ADAMTS6	2.73347	1.45073	6.21202	4.76099	5.48651	27.3311	3.81414e-20	6.6426e-19	6.18219	6.24322	6.21066	4.87079	4.66894	4.74325
RMND5A	2.50546	1.32508	6.56045	5.23527	5.89786	27.3287	3.82228e-20	6.64428e-19	6.58428	6.5332	6.56388	5.27986	5.14155	5.28438
MBNL1	2.44349	1.28894	8.06266	6.77373	7.4182	27.3202	3.8509e-20	6.68121e-19	8.05621	8.11675	8.01504	6.87409	6.65414	6.79297
ZNF486	2.64112	1.40115	6.51468	5.11333	5.814	27.3076	3.89414e-20	6.74064e-19	6.46804	6.54309	6.5329	5.20211	5.00383	5.13406
FBXO11	2.39466	1.25982	6.75712	5.49693	6.12702	27.3074	3.89496e-20	6.74064e-19	6.74213	6.74179	6.78742	5.57176	5.44432	5.47471
EFNB1	2.94012	1.55587	6.075	4.51965	5.29733	27.2771	4.00113e-20	6.88967e-19	6.15098	6.11903	5.955	4.55243	4.46268	4.54385
SLC35B1	2.24152	1.16448	7.1367	5.97244	6.55457	27.2744	4.01062e-20	6.89736e-19	7.16869	7.15954	7.08188	5.95978	5.97478	5.98277
GATAD2B	2.68705	1.42602	5.78177	4.35543	5.0686	27.2699	4.0267e-20	6.91636e-19	5.79174	5.74445	5.80913	4.38176	4.32152	4.36301
STARD4	2.84096	1.50638	5.78346	4.2767	5.03008	27.2614	4.05752e-20	6.9606e-19	5.78769	5.80284	5.75987	4.36833	4.27013	4.19162
SZRD1	2.31116	1.20862	7.28969	6.08117	6.68543	27.2261	4.18658e-20	7.16412e-19	7.28997	7.33755	7.24156	6.08454	6.14222	6.01674
RAD54L2	2.49993	1.32189	6.19821	4.87652	5.53736	27.2156	4.22614e-20	7.21861e-19	6.22357	6.2252	6.14584	4.89388	4.86893	4.86674
RLF	2.63538	1.39801	6.15646	4.75854	5.4575	27.2148	4.22894e-20	7.21861e-19	6.19203	6.16305	6.1143	4.80918	4.67389	4.79254
RRP15	2.30275	1.20336	6.95527	5.75215	6.35371	27.1911	4.31919e-20	7.36352e-19	6.95694	7.01003	6.89884	5.76575	5.73409	5.75662
TMBIM6	2.00678	1.00488	9.17907	8.17431	8.67669	27.1772	4.37318e-20	7.44077e-19	9.19712	9.21054	9.12954	8.15667	8.18127	8.18499
MYL12B	2.08347	1.05899	9.62797	8.5692	9.09858	27.1766	4.37533e-20	7.44077e-19	9.62547	9.69217	9.56628	8.52399	8.57119	8.61241
ZNF668	2.96458	1.56783	5.62158	4.05422	4.8379	27.151	4.47651e-20	7.60343e-19	5.70329	5.6174	5.54404	4.01898	4.07433	4.06935
GNA12	2.09597	1.06762	8.00337	6.93579	7.46958	27.1389	4.52488e-20	7.66664e-19	8.03909	8.0113	7.95973	6.9594	6.92282	6.92513
ZSCAN12	3.84365	1.94248	5.01967	3.07774	4.0487	27.1371	4.53215e-20	7.66949e-19	5.06553	5.09715	4.89633	3.11769	3.09755	3.01798
NTM	2.90998	1.54101	5.47853	3.93697	4.70775	27.1235	4.58744e-20	7.75351e-19	5.4914	5.44931	5.49488	4.00748	3.89725	3.9062
RBM12B	2.96133	1.56625	6.47422	4.90799	5.69111	27.1149	4.62303e-20	7.80407e-19	6.51733	6.53651	6.36884	5.04124	4.80942	4.8733
SLAIN2	2.43144	1.28181	6.91455	5.63285	6.2737	27.0882	4.73442e-20	7.98229e-19	6.95368	6.94297	6.847	5.69341	5.55782	5.64731
ZNF816	3.46795	1.79408	5.36414	3.57066	4.4674	27.0645	4.836e-20	8.14356e-19	5.33357	5.48882	5.27002	3.62887	3.54132	3.5418
SP3	2.29178	1.19647	8.14679	6.95033	7.54856	27.0421	4.93379e-20	8.2851e-19	8.14267	8.18314	8.11455	7.02719	6.8432	6.98062
HIPK2	2.49056	1.31647	8.57429	7.25764	7.91596	27.0312	4.98234e-20	8.33889e-19	8.60244	8.55332	8.5671	7.39865	7.12255	7.25171
ATP6V1C2	6.76014	2.75705	4.07254	1.31603	2.69429	27.0263	5.00406e-20	8.36505e-19	4.00747	4.14554	4.06462	1.27147	1.39757	1.27904
IL6ST	2.28863	1.19449	9.58974	8.3952	8.99247	27.0143	5.05843e-20	8.44568e-19	9.57181	9.59836	9.59905	8.48175	8.25962	8.44424
NAA15	2.14782	1.10287	7.71833	6.61524	7.16678	26.9685	5.2702e-20	8.74612e-19	7.70791	7.68711	7.75997	6.66303	6.58255	6.60014
FBXW7	3.65705	1.87068	5.98307	4.1131	5.04808	26.956	5.32972e-20	8.83422e-19	5.991	6.1409	5.81731	4.20505	4.0687	4.06554
SKI	2.25633	1.17398	7.40095	6.2268	6.81388	26.9475	5.37064e-20	8.89133e-19	7.47095	7.35128	7.38062	6.25799	6.23936	6.18307
PPP1R15B	2.37983	1.25086	7.13015	5.87943	6.50479	26.9353	5.42999e-20	8.97877e-19	7.15051	7.18412	7.05583	5.94226	5.81756	5.87847
RBM27	2.50816	1.32663	7.16689	5.8401	6.50349	26.9309	5.45131e-20	9.00318e-19	7.1356	7.19521	7.16985	5.94327	5.7144	5.86263
RWDD1	2.4027	1.26466	6.88681	5.62256	6.25469	26.9051	5.57923e-20	9.19235e-19	6.86607	6.94936	6.845	5.61599	5.55916	5.69253
TAF13	2.55817	1.35511	6.09238	4.73689	5.41463	26.89	5.65541e-20	9.3067e-19	6.09698	6.06188	6.11828	4.79587	4.67512	4.73967
TNFSF15	6.48772	2.69771	4.02165	1.32502	2.67333	26.8849	5.68138e-20	9.33825e-19	4.00747	4.072	3.98547	1.27147	1.29846	1.40512
MARK3	2.0745	1.05277	7.69638	6.6436	7.16999	26.869	5.7636e-20	9.44244e-19	7.71497	7.68136	7.69282	6.63496	6.66537	6.63047
RRN3	2.08937	1.06307	7.59022	6.52711	7.05866	26.8686	5.76538e-20	9.44244e-19	7.59092	7.58255	7.59718	6.54565	6.49748	6.53819
CLDN1	3.5842	1.84165	5.43919	3.59809	4.51864	26.858	5.82102e-20	9.51089e-19	5.42094	5.50433	5.39231	3.66593	3.41098	3.71735
RRAS2	2.15111	1.10508	7.53083	6.42576	6.9783	26.8277	5.9821e-20	9.73934e-19	7.51427	7.52669	7.55154	6.42726	6.37514	6.47489
TET3	2.73096	1.44941	6.98812	5.53807	6.2631	26.8016	6.12491e-20	9.96004e-19	7.00171	6.93477	7.02788	5.68741	5.40541	5.52141
ATAD1	2.44148	1.28775	6.63144	5.34342	5.98743	26.7914	6.18123e-20	1.00279e-18	6.63929	6.58881	6.66622	5.39175	5.25658	5.38192
PNP	3.11951	1.64132	5.38249	3.7421	4.5623	26.7752	6.27266e-20	1.01642e-18	5.42094	5.43522	5.29133	3.6829	3.77355	3.76986
WTAP	2.26627	1.18032	7.27886	6.09893	6.6889	26.7699	6.30239e-20	1.02004e-18	7.27123	7.34618	7.21918	6.06479	6.09271	6.13929
YY1	2.06738	1.0478	7.98974	6.94193	7.46584	26.7581	6.37034e-20	1.02982e-18	7.9842	7.98754	7.9975	6.95965	6.89314	6.973
ELK1	2.49427	1.31862	6.13129	4.81235	5.47182	26.755	6.38778e-20	1.03143e-18	6.12616	6.10765	6.16007	4.81909	4.85809	4.75987
CWC15	2.33022	1.22046	6.98164	5.76166	6.37165	26.7219	6.58197e-20	1.06012e-18	6.97558	7.0396	6.92974	5.69878	5.78532	5.80088
HSPA13	2.45965	1.29845	8.53175	7.23338	7.88257	26.7208	6.58861e-20	1.06012e-18	8.53103	8.56469	8.49953	7.30073	7.07749	7.32193
ZNF212	2.77842	1.47426	5.95543	4.4818	5.21862	26.7108	6.64887e-20	1.06856e-18	6.02031	5.97341	5.87256	4.41262	4.542	4.4908
HARS2	2.52812	1.33806	6.35175	5.01342	5.68258	26.7011	6.70718e-20	1.07542e-18	6.35263	6.36077	6.34185	5.04594	5.08227	4.91205
RNF19B	3.5505	1.82802	4.92806	3.10082	4.01444	26.6858	6.80125e-20	1.08544e-18	4.92205	5.01291	4.8492	3.08157	3.14111	3.07979
TRMT10C	2.95918	1.5652	6.16052	4.59647	5.3785	26.6708	6.89434e-20	1.09774e-18	6.17103	6.23802	6.07251	4.52311	4.53385	4.73247
TRIM32	3.23704	1.69467	5.63667	3.94291	4.78979	26.6424	7.07388e-20	1.12243e-18	5.63004	5.73298	5.547	3.96648	3.82564	4.03661
RRAGA	2.37903	1.25037	6.73061	5.48045	6.10553	26.5986	7.36138e-20	1.16134e-18	6.78789	6.74954	6.65439	5.50447	5.4436	5.49329
CTB-31O20.4	9.34496	3.22419	4.3431	1.11856	2.73083	26.5757	7.51602e-20	1.18032e-18	4.48691	4.30679	4.23561	1.09432	1.37342	0.887953
SDF4	2.16925	1.11719	8.12296	7.00593	7.56445	26.5326	7.81678e-20	1.22475e-18	8.17515	8.15839	8.03536	6.996	7.0341	6.98769
MED6	2.38559	1.25434	6.34427	5.09013	5.7172	26.5264	7.86143e-20	1.22754e-18	6.36192	6.32846	6.34242	5.0337	5.10719	5.1295
ZNF142	2.4702	1.30463	6.18289	4.87836	5.53062	26.5062	8.00726e-20	1.24844e-18	6.21937	6.16793	6.16136	4.88867	4.82063	4.92579
TFAM	2.33165	1.22135	7.85805	6.63682	7.24744	26.4106	8.73865e-20	1.35071e-18	7.8441	7.90979	7.82027	6.69176	6.51862	6.70008
LAMTOR3	2.60849	1.38322	6.15572	4.77281	5.46427	26.4025	8.80361e-20	1.35922e-18	6.20303	6.18547	6.07865	4.81359	4.70082	4.80403
MTA2	2.04709	1.03358	8.2066	7.17303	7.68982	26.3681	9.08537e-20	1.39957e-18	8.21779	8.21397	8.18804	7.16105	7.22752	7.13053
ZNF441	3.21608	1.6853	5.35145	3.66698	4.50921	26.3617	9.13886e-20	1.40624e-18	5.35345	5.43926	5.26164	3.6949	3.5814	3.72463
DRAM1	2.83136	1.5015	5.40154	3.90004	4.65079	26.3524	9.21721e-20	1.41671e-18	5.43344	5.36688	5.40432	3.89544	3.85646	3.94823
RAB21	2.36953	1.2446	6.58337	5.33879	5.96108	26.2967	9.70098e-20	1.48774e-18	6.59591	6.59471	6.5595	5.38954	5.25493	5.37191
ZNF292	2.87495	1.52354	6.92271	5.39903	6.16087	26.2643	9.99394e-20	1.52416e-18	6.91185	6.93298	6.92331	5.52142	5.19592	5.47974
GZF1	2.37483	1.24782	6.92578	5.67844	6.30211	26.2433	1.01885e-19	1.5504e-18	6.90288	7.02187	6.85259	5.66745	5.66179	5.70607
CBFA2T2	2.3515	1.23358	6.82455	5.5906	6.20758	26.2409	1.02115e-19	1.55217e-18	6.87985	6.7536	6.84019	5.64412	5.5403	5.5874
MAML2	2.3845	1.25369	7.04365	5.78998	6.41682	26.2322	1.02941e-19	1.563e-18	7.05629	7.08575	6.98892	5.87897	5.6993	5.79167
BAG5	2.23036	1.15728	7.094	5.93695	6.51548	26.2193	1.04167e-19	1.57639e-18	7.08299	7.16198	7.03702	5.95579	5.91696	5.9381
OSTM1	2.41539	1.27225	7.3092	6.03695	6.67308	26.218	1.04289e-19	1.5765e-18	7.33954	7.33349	7.25458	6.13034	5.91905	6.06147
AAK1	3.61266	1.85306	5.50659	3.65221	4.5794	26.1901	1.07009e-19	1.60877e-18	5.54039	5.46524	5.51414	3.8766	3.50566	3.57437
ZNF286B	3.09215	1.62861	5.0137	3.38545	4.19957	26.1866	1.07353e-19	1.61217e-18	5.03029	5.04508	4.96572	3.38399	3.39007	3.3823
VGLL3	2.45163	1.29374	9.38417	8.09044	8.7373	26.1608	1.09941e-19	1.64564e-18	9.37741	9.43025	9.34486	8.21805	7.9308	8.12246
PRDM15	2.90265	1.53737	5.40274	3.86552	4.63413	26.1526	1.10774e-19	1.6563e-18	5.32129	5.44931	5.43762	3.84248	3.87807	3.87603
TRIM23	2.72881	1.44827	6.05129	4.60253	5.32691	26.1224	1.13913e-19	1.6977e-18	6.03132	5.99964	6.12291	4.65675	4.49241	4.65843
RCHY1	2.71951	1.44335	5.75075	4.30798	5.02937	26.1208	1.14084e-19	1.69841e-18	5.7623	5.81221	5.67773	4.318	4.257	4.34895
ZNF217	2.27481	1.18574	7.49863	6.31287	6.90575	26.1021	1.16068e-19	1.72421e-18	7.53666	7.50854	7.4507	6.39046	6.21876	6.32941
SAP18	2.13536	1.09448	7.85998	6.7657	7.31284	26.0855	1.17865e-19	1.749e-18	7.90335	7.89846	7.77812	6.76788	6.74956	6.77965
ZBTB4	2.28566	1.19261	6.48454	5.29201	5.88828	26.0702	1.1955e-19	1.77209e-18	6.51635	6.48565	6.45162	5.28384	5.32349	5.26871
BMPR1A	2.3412	1.22725	6.65772	5.43065	6.04418	26.0602	1.20659e-19	1.78277e-18	6.66691	6.68466	6.62158	5.46367	5.34925	5.47902
CMTM6	2.20622	1.14157	7.06224	5.92066	6.49145	26.054	1.21355e-19	1.79113e-18	7.0677	7.06008	7.05894	5.9548	5.8458	5.96137
HUS1	2.80454	1.48776	6.32774	4.83928	5.58351	26.0459	1.22274e-19	1.80082e-18	6.29669	6.23859	6.44794	4.88238	4.74266	4.8928
HNRNPA0	2.15992	1.11098	9.05268	7.94183	8.49726	26.0439	1.22506e-19	1.80231e-18	9.11646	9.09343	8.94817	7.98853	7.92419	7.91278
SHOC2	2.27414	1.18532	7.11643	5.93106	6.52375	26.0297	1.24122e-19	1.82361e-18	7.12632	7.14415	7.07882	6.01156	5.85401	5.92763
MYF5	2.0992	1.06984	8.69749	7.62744	8.16246	26.0289	1.2422e-19	1.82361e-18	8.69016	8.62822	8.77408	7.65591	7.58493	7.64148
GPR176	2.2522	1.17133	6.85384	5.68274	6.26829	26.0191	1.25357e-19	1.83835e-18	6.88933	6.88935	6.78283	5.6964	5.67296	5.67886
ZNF205	3.01272	1.59107	5.39676	3.80575	4.60126	26.0024	1.27314e-19	1.85713e-18	5.50331	5.35623	5.33074	3.81414	3.80999	3.79312
RNF11	2.15652	1.1087	7.166	6.05729	6.61165	25.9979	1.27843e-19	1.8609e-18	7.17056	7.19252	7.13491	6.10852	6.01923	6.04413
RRS1	2.69095	1.42811	5.97934	4.55188	5.26561	25.9918	1.28568e-19	1.86947e-18	6.01199	6.05268	5.87335	4.54184	4.57546	4.53836
ZNF410	36.1519	5.176	4.10593	-1.07057	1.51768	25.9898	1.28813e-19	1.87105e-18	4.14561	4.20132	3.97087	-0.987719	-0.682429	-1.54155
FAM26E	2.23469	1.16008	6.73001	5.57005	6.15003	25.986	1.29265e-19	1.87554e-18	6.74046	6.7471	6.70247	5.59244	5.51707	5.60063
KIAA1919	3.80902	1.92942	5.1603	3.23008	4.19519	25.9824	1.29701e-19	1.87554e-18	5.24176	5.14121	5.09793	3.42203	3.08273	3.18549
LRP6	2.4377	1.28552	6.79142	5.50556	6.14849	25.9818	1.29775e-19	1.87554e-18	6.77689	6.78886	6.80851	5.61283	5.39645	5.50742
RUNX1	2.17874	1.12349	7.56742	6.44377	7.00559	25.9815	1.29804e-19	1.87554e-18	7.62834	7.52384	7.55007	6.50362	6.39251	6.43517
ZNF480	2.30396	1.20412	6.62883	5.42508	6.02695	25.9622	1.32154e-19	1.90749e-18	6.63704	6.64148	6.60796	5.37618	5.39869	5.50037
ZDHHC7	2.13518	1.09436	7.21774	6.12348	6.67061	25.9469	1.34054e-19	1.93289e-18	7.25077	7.23613	7.16633	6.1466	6.10925	6.11458
ZNF14	3.48136	1.79965	4.91889	3.12011	4.0195	25.942	1.34666e-19	1.93967e-18	4.96	4.9814	4.81527	3.13188	3.06776	3.16067
GADD45B	3.43857	1.78181	7.51481	5.73385	6.62433	25.922	1.37191e-19	1.97396e-18	7.6055	7.67624	7.26269	5.7071	5.76168	5.73277
MUL1	2.62283	1.39112	5.85534	4.46458	5.15996	25.9051	1.39368e-19	2.0011e-18	5.90232	5.86197	5.80172	4.41262	4.53657	4.44456
IL32	2.17411	1.12042	7.34785	6.22765	6.78775	25.8933	1.40918e-19	2.01704e-18	7.38155	7.36409	7.29792	6.17815	6.2878	6.21699
ZNF830	3.26149	1.70553	5.14789	3.4435	4.2957	25.8791	1.42794e-19	2.03752e-18	5.18743	5.21729	5.03895	3.38991	3.46625	3.47435
FBXO38	2.39709	1.26129	6.36649	5.10483	5.73566	25.8723	1.43705e-19	2.04839e-18	6.37224	6.36343	6.36381	5.19367	5.06823	5.05259
SGPP1	2.51486	1.33048	6.36948	5.03939	5.70444	25.852	1.46447e-19	2.08209e-18	6.38303	6.44203	6.28337	5.08659	4.97804	5.05355
ZZEF1	2.19889	1.13677	7.02478	5.88776	6.45627	25.8236	1.50385e-19	2.13035e-18	7.06904	6.97707	7.02823	5.90916	5.91644	5.83768
SMG7	2.00252	1.00182	7.83407	6.83217	7.33312	25.8059	1.52902e-19	2.16155e-18	7.84799	7.82298	7.83123	6.85844	6.83189	6.80617
SDF2L1	2.53306	1.34088	5.80556	4.46456	5.13506	25.7927	1.54791e-19	2.18376e-18	5.82376	5.78707	5.80584	4.44851	4.52429	4.42088
SP1	2.09968	1.07017	7.32037	6.25025	6.78531	25.7547	1.604e-19	2.25133e-18	7.34009	7.34106	7.27997	6.28563	6.22341	6.24171
NKTR	2.05248	1.03737	7.59874	6.56136	7.08005	25.7403	1.62583e-19	2.2742e-18	7.56747	7.63346	7.59528	6.58875	6.563	6.53233
MSL2	2.73649	1.45233	5.87296	4.42059	5.14677	25.7058	1.67926e-19	2.34261e-18	5.88118	5.91224	5.82545	4.5258	4.31361	4.42237
FAHD1	2.56037	1.35635	5.764	4.40773	5.08586	25.7017	1.68581e-19	2.34936e-18	5.759	5.7997	5.73329	4.45699	4.35582	4.41039
ITGAV	2.61668	1.38774	8.91079	7.52295	8.21687	25.6974	1.69263e-19	2.3541e-18	8.91106	8.91953	8.90177	7.67542	7.3289	7.56452
ARFIP2	2.39841	1.26208	6.19444	4.93238	5.56341	25.6921	1.70101e-19	2.36336e-18	6.19754	6.17884	6.20693	4.88028	5.00481	4.91205
CFLAR	3.30737	1.72568	5.01302	3.28777	4.15039	25.6776	1.72441e-19	2.39344e-18	5.04258	5.08172	4.91475	3.34796	3.25121	3.26414
EXOC8	2.70734	1.43688	5.60854	4.17205	4.89029	25.6758	1.72726e-19	2.39499e-18	5.66845	5.60036	5.55681	4.159	4.12583	4.23132
LINC00641	2.35362	1.23488	6.4781	5.24265	5.86038	25.6741	1.73007e-19	2.39647e-18	6.46753	6.42939	6.53737	5.28623	5.25493	5.1868
ZSCAN29	2.72599	1.44678	5.80872	4.36187	5.08529	25.6559	1.75989e-19	2.43287e-18	5.83401	5.85367	5.73847	4.44851	4.35889	4.27821
ARID1A	2.06976	1.04947	7.46189	6.41248	6.93719	25.6168	1.82586e-19	2.51646e-18	7.48253	7.48651	7.41663	6.44122	6.39963	6.3966
AFAP1-AS1	22.9838	4.52255	4.06042	-0.459028	1.8007	25.5882	1.87579e-19	2.56725e-18	4.17072	4.11809	3.89246	-0.814388	-0.175469	-0.387226
RP11-876N24.5	6.18178	2.62802	4.05556	1.42731	2.74144	25.5831	1.88474e-19	2.57694e-18	4.09403	4.0901	3.98256	1.45205	1.57744	1.25244
SPRED1	2.57045	1.36202	6.45888	5.09719	5.77804	25.5818	1.88702e-19	2.57715e-18	6.49364	6.51082	6.37217	5.15943	4.989	5.14314
OTUD7B	2.43048	1.28124	6.2883	5.00639	5.64735	25.5788	1.8924e-19	2.57715e-18	6.27717	6.23627	6.35147	5.07194	4.98303	4.96419
C11orf24	2.28691	1.1934	7.16607	5.9729	6.56948	25.5529	1.93913e-19	2.63556e-18	7.21651	7.20799	7.0737	5.96623	6.02747	5.925
PITX2	2.0812	1.05742	7.15395	6.09655	6.62525	25.5515	1.94172e-19	2.63648e-18	7.14037	7.18231	7.13916	6.11836	6.09317	6.07813
MAP3K1	2.41532	1.27222	6.80215	5.5301	6.16613	25.5426	1.95808e-19	2.65607e-18	6.74882	6.88825	6.76939	5.59628	5.44505	5.54898
ZNF470	2.49897	1.32133	5.85353	4.5318	5.19266	25.5415	1.96019e-19	2.65631e-18	5.82771	5.82462	5.90825	4.55901	4.4994	4.53698
RPL41	2.4088	1.26832	7.0323	5.76466	6.39848	25.5297	1.98215e-19	2.68342e-18	7.06636	7.10686	6.92369	5.71183	5.75176	5.8304
ZNF131	2.11933	1.08361	7.10024	6.01654	6.55839	25.5158	2.00833e-19	2.71619e-18	7.12182	7.09058	7.08832	6.06016	5.97026	6.01921
ADIPOR1	2.05502	1.03915	7.55667	6.51762	7.03715	25.4947	2.04884e-19	2.76826e-18	7.58509	7.5704	7.51452	6.5026	6.55396	6.4963
PDZD8	2.3707	1.24531	6.69431	5.44905	6.07168	25.4899	2.05818e-19	2.77814e-18	6.76416	6.68509	6.63368	5.50311	5.37076	5.47328
ADNP	2.02527	1.01812	8.7902	7.77215	8.28117	25.4664	2.10435e-19	2.83211e-18	8.80117	8.83802	8.7314	7.82886	7.73209	7.75551
COQ10B	2.53012	1.3392	6.40004	5.06145	5.73075	25.4622	2.11274e-19	2.83785e-18	6.45532	6.46202	6.28278	5.03559	5.09617	5.05259
SLC2A3	2.08213	1.05806	7.42115	6.36318	6.89216	25.4582	2.12086e-19	2.84043e-18	7.46513	7.42545	7.37287	6.38083	6.3335	6.37519
RBM15B	2.38755	1.25553	6.7675	5.51249	6.13999	25.4508	2.13568e-19	2.8547e-18	6.80924	6.83749	6.65576	5.50311	5.50809	5.52627
SETD5	2.12667	1.0886	7.39803	6.30909	6.85356	25.4081	2.22396e-19	2.96118e-18	7.38316	7.35209	7.45883	6.35308	6.29866	6.27553
BMS1P20	2.42492	1.27793	6.27293	4.9952	5.63407	25.4036	2.23357e-19	2.97111e-18	6.28466	6.32846	6.20568	5.05342	4.94463	4.98756
RPRD1B	2.26288	1.17816	7.21695	6.03914	6.62804	25.4018	2.23739e-19	2.97331e-18	7.22582	7.30361	7.12142	6.04383	6.0524	6.02118
ELMSAN1	2.2512	1.17069	7.18487	6.01407	6.59947	25.3946	2.25258e-19	2.9906e-18	7.21771	7.21184	7.12505	6.10177	5.98627	5.95417
FAM171B	2.63598	1.39834	6.28433	4.88537	5.58485	25.3866	2.26977e-19	3.01051e-18	6.2462	6.25759	6.34921	4.99637	4.76371	4.89603
PDE12	2.61274	1.38556	5.75779	4.37239	5.06509	25.37	2.30583e-19	3.05539e-18	5.773	5.80831	5.69204	4.43569	4.33409	4.34738
CMYA5	21.2339	4.4083	3.69901	-0.71218	1.49341	25.3523	2.34495e-19	3.10212e-18	3.73857	3.59901	3.75944	-0.352483	-0.96073	-0.823326
NUFIP2	2.30357	1.20387	7.85924	6.65511	7.25718	25.3231	2.41105e-19	3.17948e-18	7.85033	7.87012	7.85726	6.79406	6.55932	6.61196
CPEB4	2.88109	1.52662	6.11508	4.58802	5.35155	25.3202	2.41771e-19	3.18521e-18	6.09041	6.15386	6.10095	4.75747	4.4396	4.56697
CHMP1B	2.37852	1.25007	6.01793	4.76816	5.39305	25.317	2.42512e-19	3.18887e-18	6.05174	6.03009	5.97197	4.75059	4.77643	4.77746
ARHGAP29	2.32652	1.21817	9.29968	8.08141	8.69054	25.3006	2.46328e-19	3.23594e-18	9.27511	9.29336	9.33057	8.18034	7.9199	8.14399
PSMC1	2.91793	1.54494	5.84367	4.29988	5.07178	25.2951	2.47635e-19	3.25001e-18	5.82534	5.97759	5.72809	4.27388	4.28153	4.34424
MMP9	9.12971	3.19057	3.99856	0.808054	2.40331	25.2783	2.51626e-19	3.29345e-18	4.12776	3.97237	3.89555	0.957538	0.561497	0.905129
RPS28	5.18533	2.37444	4.27206	1.89812	3.08509	25.2781	2.51664e-19	3.29345e-18	4.41096	4.19177	4.21346	1.81964	1.94001	1.9347
C3orf38	2.49802	1.32079	5.91952	4.59908	5.2593	25.2764	2.52069e-19	3.2956e-18	5.93567	5.9231	5.8998	4.58246	4.53249	4.68229
UBXN7	2.29959	1.20138	7.17872	5.97709	6.5779	25.2463	2.59429e-19	3.38218e-18	7.215	7.13795	7.18321	6.06479	5.86812	5.99835
RSRC2	2.21648	1.14827	7.19645	6.04844	6.62245	25.2415	2.60608e-19	3.39433e-18	7.15963	7.27111	7.15862	6.07171	5.98228	6.09132
TIAL1	2.01345	1.00967	7.41981	6.41005	6.91493	25.2396	2.61091e-19	3.39739e-18	7.41241	7.41087	7.43616	6.41498	6.42848	6.3867
EID2	2.46818	1.30345	6.2159	4.91307	5.56448	25.235	2.6223e-19	3.409e-18	6.25855	6.26955	6.1196	4.88133	4.94052	4.91735
NOM1	2.30772	1.20647	7.25979	6.05354	6.65666	25.2216	2.65606e-19	3.44116e-18	7.30706	7.32013	7.15216	6.10807	6.00358	6.04897
ZNF34	3.76756	1.91363	4.88852	2.9756	3.93206	25.1693	2.79242e-19	3.61247e-18	4.96862	4.93495	4.76199	2.93545	3.10123	2.89011
UBAP1	2.35969	1.2386	6.19306	4.95431	5.57368	25.1685	2.7946e-19	3.61247e-18	6.24324	6.17522	6.16071	5.00892	4.91566	4.93836
RPL30	2.12106	1.08479	9.2325	8.14801	8.69026	25.163	2.80909e-19	3.62779e-18	9.25073	9.2898	9.15697	8.06103	8.15794	8.22508
PANK2	2.20983	1.14394	6.95011	5.80625	6.37818	25.126	2.91045e-19	3.75165e-18	7.01806	6.95325	6.87903	5.82811	5.81756	5.77308
VPRBP	2.54818	1.34947	5.82572	4.47613	5.15093	25.0587	3.10495e-19	3.97995e-18	5.87584	5.77913	5.8222	4.50277	4.39832	4.52731
ANKRD10	2.02392	1.01715	7.40931	6.39201	6.90066	25.047	3.14005e-19	4.01745e-18	7.42551	7.39119	7.41123	6.4233	6.39851	6.35424
MSC	2.14698	1.10231	8.18344	7.08127	7.63236	25.0126	3.24553e-19	4.14854e-18	8.28085	8.15609	8.11338	7.02862	7.12165	7.09355
CWC25	2.88082	1.52648	5.85581	4.32962	5.09271	24.9822	3.34214e-19	4.2562e-18	5.88194	5.94528	5.7402	4.38621	4.38328	4.21935
MAGEF1	2.29334	1.19745	6.54494	5.34771	5.94632	24.9598	3.41499e-19	4.33691e-18	6.62482	6.53698	6.47302	5.34377	5.35157	5.34778
GOLPH3	2.04247	1.03031	7.77415	6.74382	7.25898	24.929	3.5182e-19	4.45153e-18	7.78128	7.77823	7.76294	6.79266	6.66878	6.77001
C18orf25	2.66123	1.41209	5.69604	4.28356	4.9898	24.8982	3.62439e-19	4.56905e-18	5.70501	5.70808	5.67503	4.40094	4.2015	4.24824
ZNF585A	3.02503	1.59695	4.95631	3.35928	4.15779	24.892	3.646e-19	4.59207e-18	5.01789	4.93781	4.91323	3.40752	3.30964	3.36067
PHF12	2.29973	1.20146	6.73108	5.52951	6.1303	24.8911	3.64933e-19	4.59207e-18	6.80041	6.65544	6.7374	5.48179	5.59092	5.51583
RP11-309G3.3	4.3145	2.10919	4.26095	2.1531	3.20703	24.8889	3.65708e-19	4.59762e-18	4.22687	4.35249	4.2035	2.0834	2.17468	2.20122
EXOSC6	2.88354	1.52784	5.45251	3.92569	4.6891	24.8788	3.69312e-19	4.63444e-18	5.49538	5.46326	5.39887	3.80974	3.93073	4.03661
OLFML2B	2.10598	1.07449	7.20485	6.13041	6.66763	24.8711	3.72042e-19	4.66445e-18	7.2543	7.21361	7.14665	6.14965	6.1498	6.09179
DAPK3	2.30819	1.20676	7.23577	6.02925	6.63251	24.8481	3.8043e-19	4.74794e-18	7.32591	7.21861	7.1628	5.96226	6.11518	6.01031
SLITRK5	2.63514	1.39788	6.72673	5.32898	6.02785	24.843	3.82333e-19	4.76736e-18	6.83774	6.75157	6.59087	5.41733	5.26973	5.29988
AP3M1	2.04288	1.0306	7.12771	6.09706	6.61239	24.839	3.83811e-19	4.77713e-18	7.15145	7.12422	7.10747	6.12236	6.09732	6.07149
SPRY4	3.88428	1.95765	4.69699	2.73979	3.71839	24.8158	3.92551e-19	4.87267e-18	4.82731	4.69758	4.56607	2.75919	2.75381	2.70637
ARL4C	2.23403	1.15965	6.39128	5.23153	5.8114	24.8012	3.98121e-19	4.93735e-18	6.44301	6.3581	6.37273	5.23454	5.25493	5.20512
MMP1	3.40709	1.76854	4.68384	2.91458	3.79921	24.8003	3.98485e-19	4.9374e-18	4.71401	4.59086	4.74664	2.91917	2.89195	2.93261
NUP153	2.1687	1.11683	7.38563	6.26855	6.82709	24.7928	4.01392e-19	4.96895e-18	7.41004	7.32968	7.41716	6.32979	6.18187	6.29399
RRAGC	2.25235	1.17143	6.3083	5.13655	5.72243	24.7775	4.07388e-19	5.0341e-18	6.31933	6.28142	6.32415	5.18859	5.0934	5.12767
PRDM4	2.20113	1.13824	6.3657	5.22758	5.79664	24.776	4.08009e-19	5.03725e-18	6.3964	6.37138	6.32931	5.22794	5.23329	5.2215
ARF6	2.11636	1.08158	7.10698	6.02563	6.56631	24.773	4.09184e-19	5.04721e-18	7.14861	7.13391	7.03842	6.02921	6.00161	6.04607
LEO1	2.2468	1.16787	6.19188	5.02394	5.60791	24.7527	4.17344e-19	5.13864e-18	6.19142	6.18667	6.19755	5.04781	4.98303	5.04098
KCMF1	2.08214	1.05807	7.13346	6.07559	6.60453	24.742	4.21714e-19	5.17977e-18	7.13942	7.18352	7.07746	6.08545	6.07269	6.06864
DR1	2.11153	1.07829	7.41716	6.33896	6.87806	24.7408	4.22192e-19	5.17977e-18	7.42447	7.43812	7.38888	6.376	6.25266	6.38823
MKL1	2.19113	1.13168	6.44371	5.31232	5.87801	24.6926	4.42454e-19	5.40423e-18	6.47057	6.46252	6.39805	5.29571	5.31163	5.32961
TMEM30A	2.09336	1.06582	9.06079	7.9949	8.52784	24.6631	4.55394e-19	5.5475e-18	9.06079	9.0722	9.04937	8.09652	7.88403	8.00416
FEM1B	2.48173	1.31135	7.16965	5.85839	6.51402	24.6545	4.5923e-19	5.57937e-18	7.15051	7.21537	7.14307	5.94829	5.69139	5.93549
MORC3	2.34273	1.22819	6.40025	5.17193	5.78609	24.6387	4.66372e-19	5.65614e-18	6.4212	6.37876	6.40078	5.22794	5.06635	5.2215
DHX34	2.34767	1.23123	6.56981	5.33842	5.95411	24.6219	4.74078e-19	5.73948e-18	6.61799	6.49247	6.59896	5.27587	5.42095	5.31843
TMEM57	2.36211	1.24008	5.84361	4.60341	5.22351	24.6187	4.75567e-19	5.75243e-18	5.86972	5.80831	5.85279	4.58762	4.62231	4.60031
ZFP36L2	2.02184	1.01567	8.25735	7.24175	7.74955	24.6112	4.79043e-19	5.78858e-18	8.325	8.25824	8.18882	7.27398	7.20418	7.24708
GPC6	2.21653	1.1483	8.40493	7.25657	7.83075	24.5937	4.87316e-19	5.87903e-18	8.42296	8.41196	8.37986	7.36392	7.12233	7.28346
SSH1	2.04844	1.03452	8.17738	7.14262	7.66	24.5882	4.8992e-19	5.90526e-18	8.20615	8.1293	8.19669	7.22639	7.09766	7.10381
CHERP	2.1964	1.13514	6.6835	5.54823	6.11586	24.5812	4.93284e-19	5.94059e-18	6.73457	6.67485	6.64108	5.60712	5.52805	5.50952
SHISA2	2.04917	1.03504	7.15787	6.12278	6.64032	24.5799	4.93924e-19	5.94309e-18	7.20622	7.12954	7.13785	6.12724	6.14088	6.10021
TCEB1	2.12232	1.08564	6.88166	5.79632	6.33899	24.5723	4.976e-19	5.96122e-18	6.88213	6.9055	6.85736	5.76916	5.75993	5.85988
CDR2L	2.22041	1.15083	6.3796	5.2286	5.8041	24.569	4.9925e-19	5.97577e-18	6.38678	6.34524	6.40676	5.20211	5.28032	5.20339
AC016722.2	7.88496	2.9791	3.56316	0.585017	2.07409	24.5535	5.06887e-19	6.05664e-18	3.56759	3.55873	3.56315	0.446377	0.644553	0.66412
HSPA14	2.19198	1.13223	6.40966	5.27773	5.84369	24.5401	5.1356e-19	6.12572e-18	6.41543	6.44304	6.37051	5.27027	5.25493	5.30798
YOD1	2.69751	1.43163	6.33858	4.90733	5.62296	24.5337	5.1677e-19	6.15333e-18	6.29555	6.41048	6.30972	4.96796	4.74148	5.01254
RP5-940J5.6	19.7408	4.30311	3.4333	-0.867398	1.28295	24.5109	5.28472e-19	6.28178e-18	3.41201	3.45081	3.43709	-1.25691	-0.682429	-0.662861
MTF1	2.88802	1.53008	5.00426	3.47351	4.23889	24.509	5.29472e-19	6.28822e-18	5.02891	4.96608	5.0178	3.52781	3.48609	3.40662
AC006116.24	3.24209	1.69692	5.25164	3.55484	4.40324	24.5051	5.3147e-19	6.30107e-18	5.12712	5.3271	5.3007	3.60362	3.42866	3.63224
PCDHGC4	26.5271	4.72939	3.59752	-1.1287	1.23441	24.4971	5.35677e-19	6.34546e-18	3.67329	3.66948	3.44978	-1.33285	-1.22992	-0.823326
LZTS2	2.05544	1.03945	7.69451	6.65522	7.17487	24.4736	5.4818e-19	6.47682e-18	7.74934	7.71507	7.61912	6.64396	6.69124	6.63047
MXD1	3.63428	1.86167	4.46542	2.60448	3.53495	24.4596	5.55752e-19	6.54938e-18	4.52636	4.42965	4.44027	2.52109	2.59582	2.69654
PHLDA3	2.31598	1.21162	7.83757	6.6263	7.23194	24.4489	5.61653e-19	6.6076e-18	7.9026	7.90687	7.70324	6.58359	6.69946	6.59585
PRCC	2.2089	1.14333	6.45907	5.31584	5.88746	24.4433	5.64737e-19	6.63748e-18	6.47209	6.47044	6.4347	5.29019	5.38366	5.27367
NAA30	2.21387	1.14657	7.11347	5.96684	6.54015	24.4314	5.71416e-19	6.69951e-18	7.09813	7.12516	7.11712	6.03441	5.85182	6.01427
NUP50	2.0793	1.0561	7.04084	5.98479	6.51281	24.4257	5.74593e-19	6.73101e-18	7.02977	7.08833	7.00441	6.02351	5.97979	5.95107
PRPF18	4.18629	2.06567	4.50124	2.43733	3.46928	24.4188	5.78559e-19	6.7717e-18	4.43603	4.63379	4.4339	2.38547	2.36426	2.56224
IL8	6.97604	2.80241	4.96458	2.16297	3.56378	24.4045	5.86735e-19	6.8499e-18	5.09074	5.09459	4.70842	2.37953	1.91513	2.19425
PIK3R4	2.28674	1.19329	6.33127	5.138	5.73463	24.4007	5.88949e-19	6.86991e-18	6.37224	6.33172	6.28986	5.19282	5.06541	5.15575
TNRC6B	2.17021	1.11784	6.64324	5.52507	6.08415	24.3733	6.05042e-19	7.0278e-18	6.60699	6.61584	6.70688	5.55408	5.49556	5.52558
CCDC117	2.0911	1.06426	6.69288	5.62844	6.16066	24.3649	6.10106e-19	7.06869e-18	6.69184	6.68168	6.70512	5.66501	5.6007	5.61962
SERTAD3	2.94961	1.56052	5.90634	4.34684	5.12659	24.3476	6.20568e-19	7.1778e-18	6.00712	5.97689	5.73502	4.34263	4.30566	4.39223
CTBP2	2.02849	1.02041	7.30596	6.28529	6.79562	24.3402	6.25117e-19	7.22434e-18	7.2974	7.27309	7.34737	6.32979	6.26255	6.26351
PBX2	2.13176	1.09204	6.63966	5.54793	6.09379	24.3214	6.36889e-19	7.32956e-18	6.65494	6.67699	6.58704	5.53083	5.55715	5.5558
MAGEH1	2.45933	1.29826	6.12688	4.82925	5.47807	24.3039	6.47983e-19	7.44476e-18	6.19326	6.17279	6.01459	4.81579	4.82731	4.84466
MRPL44	2.28907	1.19476	6.01962	4.82515	5.42239	24.2618	6.75538e-19	7.72903e-18	5.98605	6.07037	6.00244	4.81139	4.83507	4.82899
RNF19A	2.22001	1.15056	6.232	5.08116	5.65658	24.2589	6.7749e-19	7.74492e-18	6.22597	6.21228	6.25774	5.12347	5.03879	5.08121
JMJD1C	2.1017	1.07156	8.07799	7.00639	7.54219	24.2311	6.96417e-19	7.95467e-18	8.08687	8.07452	8.07259	7.0739	6.88969	7.0556
CEBPZ	2.18829	1.1298	6.91033	5.78064	6.34549	24.2264	6.99678e-19	7.98528e-18	6.85605	6.96766	6.9073	5.81991	5.70234	5.81968
GTF2E1	2.36534	1.24205	5.72853	4.48637	5.10745	24.2063	7.13715e-19	8.13197e-18	5.7415	5.70389	5.7402	4.4973	4.45263	4.50917
CBFB	2.07122	1.05048	6.96855	5.91801	6.44328	24.2008	7.17666e-19	8.17022e-18	7.00101	6.9715	6.93314	5.9528	5.93202	5.8692
JMJD6	2.45239	1.29419	5.54818	4.25385	4.90102	24.1926	7.23524e-19	8.23009e-18	5.57655	5.53486	5.53315	4.26907	4.27828	4.21419
CTBP1-AS2	2.58272	1.36889	5.45584	4.08731	4.77157	24.1874	7.27273e-19	8.26589e-18	5.4272	5.51872	5.4216	4.07332	4.13842	4.05018
ZNF148	2.30666	1.2058	6.6062	5.4003	6.00325	24.1851	7.28884e-19	8.27735e-18	6.57113	6.62029	6.62717	5.46437	5.28356	5.45298
GAPVD1	2.39528	1.2602	6.14199	4.8819	5.51195	24.1662	7.42766e-19	8.4163e-18	6.17538	6.18908	6.06152	4.94804	4.87431	4.82336
NDN	2.47206	1.30571	6.03086	4.72593	5.37839	24.1452	7.58413e-19	8.57724e-18	6.0858	6.04806	5.95871	4.64813	4.7165	4.81316
RPL36AL	2.0003	1.00022	8.14904	7.14905	7.64904	24.1238	7.74692e-19	8.74695e-18	8.15939	8.19931	8.0884	7.09284	7.19732	7.15698
MRRF	2.74745	1.45809	5.00836	3.55048	4.27942	24.1194	7.78094e-19	8.77708e-18	5.04122	5.00203	4.98183	3.54117	3.53589	3.57437
PDE4B	3.60629	1.85051	4.72936	2.87987	3.80461	24.1187	7.78638e-19	8.77708e-18	4.84926	4.71934	4.61947	2.78637	2.95025	2.90299
OGFRL1	2.19032	1.13114	7.9107	6.7795	7.3451	24.1172	7.79845e-19	8.78349e-18	7.86309	7.95246	7.91656	6.87304	6.65758	6.80789
SMIM13	2.25267	1.17163	6.49372	5.32209	5.90791	24.0621	8.2383e-19	9.21088e-18	6.48316	6.53226	6.46575	5.39764	5.23664	5.33199
MAP1LC3B	2.01807	1.01297	7.07753	6.06467	6.5711	24.0609	8.24831e-19	9.21088e-18	7.10041	7.07703	7.05513	6.02873	6.10238	6.06291
CHTOP	2.08206	1.05801	6.78784	5.72987	6.25885	24.0597	8.25832e-19	9.21088e-18	6.78992	6.82288	6.75071	5.76119	5.73528	5.69315
POGK	2.03083	1.02207	6.99451	5.97246	6.48348	24.0597	8.25835e-19	9.21088e-18	6.98835	7.02523	6.96995	6.00964	5.95305	5.95469
CDKN2AIP	2.62622	1.39299	5.80164	4.40931	5.10547	24.0575	8.27638e-19	9.2235e-18	5.79739	5.86647	5.74106	4.42852	4.29445	4.50495
ZFP82	2.35886	1.23809	5.837	4.59895	5.21798	24.0363	8.45364e-19	9.39817e-18	5.78199	5.86197	5.86705	4.60299	4.56483	4.62902
ZC3H4	2.21113	1.14478	6.33354	5.18872	5.76113	24.0268	8.5342e-19	9.48006e-18	6.34823	6.34093	6.31146	5.18944	5.24997	5.12676
RNF219	2.39766	1.26163	5.89514	4.63393	5.26454	24.0248	8.55099e-19	9.49104e-18	5.87355	5.9559	5.85597	4.6506	4.57015	4.68105
ZNF616	2.21358	1.14638	6.17406	5.02786	5.60096	24.0196	8.59554e-19	9.53279e-18	6.17103	6.21051	6.14063	5.05248	4.99693	5.03417
PPP1R10	2.0864	1.06101	6.82154	5.76047	6.29101	24.017	8.61853e-19	9.55058e-18	6.85759	6.81007	6.79697	5.76461	5.80464	5.71218
TSC22D2	2.08362	1.05909	7.06806	6.00895	6.53851	24.0135	8.64854e-19	9.57612e-18	7.10791	7.0568	7.03947	6.05318	5.93975	6.03392
ATP6V1A	2.12417	1.0869	6.75165	5.6644	6.20802	23.9935	8.82274e-19	9.75328e-18	6.76581	6.72948	6.75965	5.73817	5.63411	5.62092
ZNF195	2.26463	1.17928	6.52128	5.34237	5.93182	23.9868	8.88275e-19	9.81173e-18	6.51439	6.54262	6.50682	5.24845	5.4356	5.34306
AKAP12	2.15286	1.10626	7.25354	6.14734	6.70044	23.9837	8.9103e-19	9.83425e-18	7.2776	7.27874	7.20428	6.21612	6.04812	6.17778
SETX	2.11898	1.08337	6.98601	5.90225	6.44413	23.9583	9.13963e-19	1.00631e-17	6.988	6.96205	7.00799	5.98785	5.87619	5.84271
FAM122A	3.23732	1.6948	4.62927	2.93512	3.78219	23.9324	9.37979e-19	1.02863e-17	4.69855	4.62318	4.56607	2.87343	2.97854	2.9534
PURA	2.81042	1.49079	5.70019	4.20987	4.95503	23.9144	9.55116e-19	1.04492e-17	5.75236	5.75664	5.59159	4.29453	4.0818	4.25328
CHD9	2.31642	1.2119	7.43025	6.21827	6.82426	23.8968	9.7213e-19	1.061e-17	7.40925	7.46784	7.41366	6.33555	6.07082	6.24845
NSA2	2.14029	1.09781	6.79454	5.6971	6.24582	23.8733	9.95331e-19	1.08438e-17	6.78545	6.83596	6.7622	5.682	5.63855	5.77074
HPS6	2.77934	1.47474	5.75376	4.28007	5.01691	23.8727	9.95917e-19	1.08438e-17	5.8574	5.77833	5.62554	4.19663	4.30406	4.33951
CTC-325H20.4	3.72358	1.89669	4.2317	2.3348	3.28325	23.8706	9.98018e-19	1.08581e-17	4.16573	4.25043	4.27893	2.34339	2.32703	2.33397
ZNF865	2.49813	1.32085	5.66631	4.3451	5.0057	23.8663	1.00236e-18	1.08905e-17	5.72125	5.57763	5.70003	4.32265	4.35119	4.36145
C19orf24	2.87565	1.52389	5.4515	3.92752	4.68951	23.8455	1.02348e-18	1.11e-17	5.51218	5.42609	5.41622	3.88291	4.08366	3.816
NOP14-AS1	4.33951	2.11753	4.60451	2.48721	3.54586	23.8329	1.03663e-18	1.12248e-17	4.70372	4.67377	4.43603	2.56883	2.55882	2.33397
FYTTD1	2.13794	1.09622	7.19762	6.10122	6.64942	23.8209	1.04915e-18	1.13425e-17	7.19035	7.17748	7.22504	6.16957	5.99569	6.13838
KBTBD7	2.90418	1.53813	5.56694	4.02895	4.79795	23.7925	1.07964e-18	1.16086e-17	5.5803	5.64826	5.47225	4.16591	3.9099	4.01105
PTCHD4	3.06578	1.61625	5.04368	3.42809	4.23589	23.753	1.12358e-18	1.20243e-17	5.03166	5.09587	5.00352	3.45628	3.28072	3.54728
ATXN1L	2.11408	1.08003	6.62466	5.54444	6.08455	23.7255	1.15519e-18	1.23337e-17	6.64691	6.62384	6.60323	5.60712	5.53078	5.49542
SNX18	2.12651	1.08849	7.08052	5.99229	6.5364	23.717	1.16515e-18	1.24111e-17	7.13687	7.10781	6.99687	6.013	5.93924	6.02462
SOCS4	2.22655	1.15481	7.17487	6.02024	6.59756	23.7095	1.17399e-18	1.24762e-17	7.1715	7.23468	7.11844	6.08819	5.90438	6.06816
RPS15A	2.52534	1.33648	6.42226	5.08682	5.75454	23.7011	1.18408e-18	1.25543e-17	6.43162	6.50071	6.33446	4.95005	5.16636	5.14404
PLK2	2.21757	1.14898	8.5081	7.35944	7.93377	23.6948	1.19164e-18	1.26248e-17	8.53829	8.62423	8.36179	7.3718	7.35649	7.35003
DSP	2.0756	1.05353	7.0651	6.01118	6.53814	23.6858	1.20251e-18	1.27203e-17	7.05461	7.01071	7.12999	6.05691	5.97779	5.99885
FAM127B	2.48662	1.31418	6.52965	5.21591	5.87278	23.6596	1.23483e-18	1.30321e-17	6.62936	6.53933	6.42026	5.15509	5.32349	5.16914
RP11-473I1.5	7.89829	2.98154	3.47866	0.497047	1.98785	23.6535	1.24248e-18	1.30827e-17	3.45353	3.4468	3.53563	0.376555	0.644553	0.470033
MFHAS1	2.5332	1.34096	5.95608	4.61535	5.28571	23.6468	1.25095e-18	1.31518e-17	5.96396	6.04276	5.86152	4.70503	4.5781	4.56292
CBWD5	4.38634	2.13302	4.24265	2.10977	3.17621	23.6204	1.28491e-18	1.34779e-17	4.26001	4.33091	4.13704	2.25535	1.98851	2.08545
RP11-61L19.3	9.34584	3.22432	3.28487	0.0600255	1.67245	23.6007	1.31091e-18	1.37191e-17	3.29812	3.28114	3.27537	0.144193	0.0238401	0.0120437
ATP13A3	2.30668	1.20582	9.35798	8.1521	8.75504	23.587	1.32934e-18	1.38909e-17	9.3377	9.37912	9.35713	8.28171	7.97082	8.20377
PCDHB2	2.23186	1.15825	6.67477	5.51644	6.0956	23.5842	1.33309e-18	1.39195e-17	6.75464	6.64017	6.6295	5.57696	5.43779	5.53457
BTBD7	2.07855	1.05558	7.02675	5.97086	6.49881	23.5802	1.33854e-18	1.39551e-17	7.02255	6.98469	7.07302	6.02446	5.90385	5.98428
CDC5L	2.00491	1.00354	6.92275	5.91938	6.42107	23.566	1.35803e-18	1.41477e-17	6.9263	6.93083	6.91113	5.8983	5.8954	5.96445
MSX2	2.77489	1.47243	5.55405	4.08264	4.81835	23.5499	1.38039e-18	1.43587e-17	5.60906	5.63687	5.41622	4.08249	4.03639	4.12904
ZNF805	4.41312	2.1418	4.40815	2.26606	3.33711	23.5243	1.41681e-18	1.46821e-17	4.40462	4.48736	4.33246	2.47171	2.05074	2.27574
BRWD1	2.26143	1.17724	6.79783	5.61998	6.20891	23.5235	1.41803e-18	1.46836e-17	6.76705	6.74547	6.88098	5.71302	5.54233	5.60458
ETV6	2.8216	1.49651	5.15478	3.6588	4.40679	23.5181	1.42579e-18	1.47528e-17	5.23344	5.18637	5.04454	3.68049	3.65084	3.64508
ABI3BP	2.18043	1.12461	7.27799	6.15309	6.71554	23.512	1.4347e-18	1.48339e-17	7.27991	7.26259	7.29147	6.26686	6.04047	6.15193
SF3B4	2.12663	1.08857	7.10061	6.01226	6.55644	23.5074	1.44145e-18	1.48701e-17	7.15366	7.1217	7.02647	5.97757	6.08761	5.9716
ZBTB7B	3.26216	1.70583	5.3301	3.62479	4.47745	23.5044	1.44588e-18	1.49046e-17	5.4904	5.28955	5.21035	3.55441	3.7456	3.57437
ZNF74	2.20631	1.14163	6.14466	5.00314	5.5739	23.4911	1.4656e-18	1.50966e-17	6.20181	6.12719	6.10497	4.98566	5.02916	4.9946
GNG11	2.02823	1.02022	7.43162	6.41168	6.92165	23.4883	1.46977e-18	1.51282e-17	7.42811	7.44366	7.42308	6.3344	6.40894	6.49169
BCL9	2.1259	1.08807	6.23229	5.14435	5.68832	23.4775	1.48606e-18	1.52844e-17	6.2562	6.23686	6.20381	5.13849	5.14601	5.14856
HMG20A	2.02034	1.0146	6.78883	5.77405	6.28144	23.4568	1.51779e-18	1.55757e-17	6.80644	6.7532	6.80687	5.79615	5.74942	5.77659
KIF1B	2.17067	1.11814	7.59289	6.47444	7.03366	23.4384	1.54662e-18	1.58244e-17	7.59324	7.55	7.63542	6.57744	6.35524	6.49062
RPL37A	2.00042	1.0003	9.62841	8.62839	9.1284	23.4372	1.54856e-18	1.58324e-17	9.66246	9.70145	9.52133	8.57147	8.64349	8.67022
PRR5L	2.68677	1.42587	5.14828	3.72223	4.43526	23.4271	1.56459e-18	1.59725e-17	5.10775	5.20072	5.13638	3.7942	3.7147	3.6578
MIR22HG	2.35526	1.23588	5.80792	4.5725	5.19021	23.4134	1.58667e-18	1.61656e-17	5.82138	5.86046	5.74192	4.55243	4.61847	4.54659
FLT1	2.28573	1.19265	6.40335	5.2113	5.80733	23.3943	1.61795e-18	1.6444e-17	6.42955	6.48419	6.29631	5.21049	5.19764	5.22578
KCNE4	2.71604	1.44151	5.28436	3.84382	4.56409	23.3876	1.62922e-18	1.65463e-17	5.31904	5.3412	5.19284	3.81854	3.79188	3.92105
POMK	5.48456	2.45538	4.52665	2.07004	3.29835	23.3643	1.66849e-18	1.69201e-17	4.47486	4.59449	4.51061	2.39138	1.7183	2.10044
COIL	2.10999	1.07724	6.39138	5.31427	5.85283	23.3391	1.71214e-18	1.73244e-17	6.42224	6.40326	6.34865	5.33842	5.28275	5.32163
SMAD5	2.03167	1.02267	7.58232	6.55964	7.07098	23.3377	1.71469e-18	1.73374e-17	7.57219	7.60857	7.56619	6.62996	6.46571	6.58323
L3MBTL3	2.37453	1.24764	5.94344	4.69581	5.31962	23.3336	1.72194e-18	1.73979e-17	5.91872	6.01258	5.89903	4.77793	4.67018	4.63932
ATF1	2.82372	1.4976	5.87788	4.37993	5.1289	23.3297	1.72887e-18	1.74423e-17	5.86049	5.93959	5.83355	4.56687	4.22867	4.34424
FNDC3B	2.07629	1.05401	8.30971	7.25567	7.78269	23.3257	1.73589e-18	1.75003e-17	8.32863	8.34073	8.25977	7.3628	7.15567	7.24856
EMC8	2.2903	1.19554	5.8997	4.70466	5.30218	23.3067	1.77005e-18	1.77924e-17	5.93713	5.91877	5.8432	4.65429	4.72964	4.73006
ARHGAP5	2.1811	1.12505	8.29405	7.16893	7.73149	23.3024	1.77797e-18	1.7859e-17	8.27926	8.31471	8.28817	7.27538	7.01862	7.21279
TAOK1	2.46427	1.30116	8.33607	7.03466	7.68536	23.3002	1.78201e-18	1.78865e-17	8.31588	8.32607	8.36626	7.20179	6.84155	7.06064
CSNK2A3	2.54601	1.34824	5.45025	4.10186	4.77605	23.2839	1.81217e-18	1.81759e-17	5.36437	5.4966	5.48976	4.14682	4.05738	4.10137
CGRRF1	2.42825	1.27991	5.7328	4.45341	5.0931	23.2734	1.83179e-18	1.83326e-17	5.75817	5.77514	5.66509	4.46822	4.37722	4.51478
BTG3	2.14347	1.09995	6.21618	5.1165	5.66634	23.2712	1.83588e-18	1.83576e-17	6.24856	6.23221	6.16777	5.11188	5.10719	5.13041
MB21D2	2.31308	1.20981	5.7478	4.5383	5.14305	23.2153	1.94482e-18	1.9351e-17	5.77054	5.78707	5.6858	4.55111	4.54064	4.52314
TFB2M	2.33258	1.22192	5.85044	4.62912	5.23978	23.2082	1.95898e-18	1.94637e-17	5.86049	5.91659	5.77423	4.61061	4.64644	4.63031
FAM127A	2.05012	1.03571	7.46866	6.43317	6.95091	23.2022	1.97126e-18	1.95575e-17	7.54532	7.45293	7.40771	6.37002	6.4778	6.4517
WIPF2	2.04522	1.03225	6.46206	5.42966	5.94586	23.1977	1.98037e-18	1.96133e-17	6.46246	6.44655	6.47716	5.44673	5.41283	5.42943
PPM1D	2.7586	1.46394	6.0466	4.58363	5.31511	23.1749	2.02758e-18	2.00439e-17	6.09894	6.16671	5.87413	4.61819	4.52976	4.60294
NDNL2	2.71841	1.44277	5.0064	3.56425	4.28533	23.1464	2.08805e-18	2.05825e-17	5.03713	5.03711	4.94495	3.55967	3.5112	3.62189
SLMO2	2.02302	1.01651	8.07698	7.06055	7.56876	23.1438	2.09368e-18	2.06232e-17	8.07678	8.12602	8.02815	7.12846	6.96408	7.08909
ZNF850	3.11072	1.63725	4.83307	3.19704	4.01505	23.1275	2.12926e-18	2.09137e-17	4.8678	4.90897	4.72244	3.18731	3.12312	3.28068
NUAK1	2.26479	1.17937	8.026	6.84692	7.43646	23.0992	2.19276e-18	2.14453e-17	8.08984	8.11864	7.86952	6.89089	6.79316	6.85671
DBR1	2.29658	1.19949	5.65956	4.45986	5.05971	23.0842	2.22695e-18	2.17473e-17	5.69725	5.62362	5.65781	4.47937	4.44685	4.45335
ACVR1	2.10583	1.07439	6.50191	5.42751	5.96471	23.0519	2.30281e-18	2.241e-17	6.5416	6.48955	6.47458	5.46717	5.36312	5.45225
ZNF629	2.23838	1.16245	5.87465	4.71227	5.29346	23.0475	2.31333e-18	2.24965e-17	5.91352	5.87768	5.83274	4.71802	4.74148	4.6773
SESN2	3.25888	1.70438	5.77539	4.07211	4.92375	23.0313	2.35277e-18	2.28279e-17	5.81661	5.93817	5.5714	4.08978	4.14557	3.981
ATAD2B	2.54825	1.3495	6.31309	4.96358	5.63833	23.0208	2.37834e-18	2.30308e-17	6.30522	6.36077	6.27329	5.09114	4.78903	5.01056
C18orf21	2.77333	1.47162	5.1207	3.65017	4.38544	23.0139	2.39556e-18	2.31649e-17	5.1601	5.17431	5.02771	3.56752	3.70506	3.67793
EVA1A	2.33582	1.22393	5.73901	4.51526	5.12713	23.0016	2.4264e-18	2.33973e-17	5.81183	5.71226	5.69293	4.48629	4.5447	4.51478
ZNF583	2.4613	1.29942	5.52559	4.22668	4.87613	23.0003	2.42964e-18	2.34121e-17	5.46627	5.61561	5.49488	4.22339	4.22193	4.23472
BNIP2	2.27212	1.18404	6.6852	5.50053	6.09286	22.9813	2.4782e-18	2.38466e-17	6.70264	6.58061	6.77234	5.55342	5.42536	5.5228
SPATA2	2.37352	1.24703	5.45044	4.20337	4.8269	22.9707	2.50575e-18	2.40496e-17	5.44892	5.4563	5.44609	4.19663	4.25369	4.15978
RNF111	2.55341	1.35242	5.91399	4.56112	5.23755	22.9569	2.54186e-18	2.43568e-17	5.92759	5.89543	5.91894	4.68951	4.4028	4.59105
PMEPA1	2.12511	1.08754	6.4378	5.35058	5.89419	22.944	2.57636e-18	2.46359e-17	6.49662	6.44906	6.36772	5.34301	5.33604	5.37269
ZC3H18	2.02656	1.01904	6.57816	5.55903	6.0686	22.9391	2.58943e-18	2.47364e-17	6.57584	6.56683	6.59182	5.54747	5.60265	5.52696
TMEM87A	2.35702	1.23696	5.73896	4.50155	5.12026	22.9381	2.59227e-18	2.47364e-17	5.72465	5.67249	5.81976	4.48629	4.49521	4.52314
CNTNAP2	2.139	1.09694	6.44375	5.34674	5.89525	22.9359	2.59828e-18	2.47765e-17	6.43111	6.4788	6.42133	5.42312	5.28275	5.33437
NOL8	2.09947	1.07003	6.43555	5.3653	5.90042	22.9271	2.62207e-18	2.4986e-17	6.41333	6.41305	6.48026	5.39249	5.31004	5.39337
RP11-815I9.4	3.1568	1.65846	4.55322	2.89408	3.72365	22.9043	2.68539e-18	2.54834e-17	4.5283	4.56336	4.56801	3.0142	2.79529	2.87276
NRBF2	2.14487	1.10089	6.27715	5.17616	5.72666	22.8988	2.70066e-18	2.55929e-17	6.30522	6.25473	6.27151	5.21633	5.10444	5.20772
SH3BGRL3	2.14454	1.10067	6.9949	5.89481	6.44485	22.89	2.72555e-18	2.57932e-17	7.03491	7.06335	6.88644	5.85189	5.90648	5.92605
LIF	2.13861	1.09667	7.5365	6.44023	6.98836	22.876	2.7659e-18	2.61211e-17	7.5644	7.60205	7.44305	6.36815	6.53334	6.41919
ID1	2.45466	1.29552	6.46523	5.17033	5.81778	22.8534	2.83208e-18	2.67095e-17	6.55977	6.50602	6.32989	5.11367	5.26235	5.13497
ADNP2	2.25869	1.17549	6.43778	5.26251	5.85014	22.8448	2.85756e-18	2.69127e-17	6.46398	6.49732	6.35203	5.33995	5.18469	5.26289
C12orf54	2.81593	1.49361	5.16158	3.66706	4.41432	22.8407	2.86985e-18	2.6973e-17	5.09469	5.12123	5.26882	3.66349	3.75264	3.58507
BAG4	2.23691	1.16151	5.96182	4.80085	5.38134	22.8303	2.90122e-18	2.71935e-17	5.94443	5.99347	5.94757	4.73904	4.79131	4.87221
ZNF550	3.43268	1.77933	4.66264	2.8842	3.77342	22.8273	2.91037e-18	2.72607e-17	4.72592	4.75543	4.50657	2.92326	2.89195	2.8374
MRPL36	2.47321	1.30638	5.45394	4.14811	4.80103	22.778	3.06485e-18	2.85326e-17	5.51611	5.47216	5.37356	4.10964	4.1929	4.14178
ZNRF3	2.34694	1.23078	5.93161	4.70133	5.31647	22.7557	3.13748e-18	2.91298e-17	5.932	6.02203	5.84079	4.73672	4.68497	4.68229
ANKRD50	2.39317	1.25892	6.79074	5.53167	6.1612	22.711	3.28825e-18	3.04752e-17	6.82277	6.79832	6.75113	5.6644	5.36465	5.56596
SCYL2	2.08043	1.05688	7.3527	6.29572	6.82421	22.7101	3.29126e-18	3.04752e-17	7.33898	7.3286	7.39053	6.33632	6.18143	6.3694
NAIF1	3.05739	1.6123	4.46346	2.85174	3.6576	22.6992	3.32916e-18	3.07433e-17	4.4688	4.50481	4.41676	2.85644	2.80435	2.89442
CEBPB	2.42872	1.28019	5.94732	4.66659	5.30696	22.6974	3.3358e-18	3.07839e-17	5.94006	5.85215	6.04976	4.6068	4.73202	4.66096
DYRK3	3.9006	1.9637	4.19442	2.23068	3.21255	22.6812	3.39311e-18	3.12498e-17	4.16323	4.27776	4.14226	2.36759	2.09571	2.22876
B3GALNT2	2.26807	1.18146	5.94095	4.75959	5.35027	22.6793	3.39972e-18	3.12688e-17	5.94297	5.98934	5.89052	4.83001	4.69718	4.75158
SPATA5	2.60539	1.3815	5.20451	3.82301	4.51376	22.6766	3.4096e-18	3.13387e-17	5.23463	5.19237	5.18654	3.8766	3.70989	3.88254
C5orf24	2.05078	1.03617	7.67301	6.63659	7.1548	22.6633	3.45768e-18	3.17169e-17	7.65261	7.6339	7.73253	6.70903	6.533	6.66774
NAA25	2.00071	1.00051	6.71334	5.71281	6.21307	22.6498	3.50726e-18	3.2116e-17	6.72316	6.72369	6.69316	5.75776	5.66241	5.71826
MEF2D	2.18474	1.12746	6.31791	5.19016	5.75403	22.647	3.51772e-18	3.21818e-17	6.36465	6.28983	6.29924	5.213	5.25658	5.1009
ZNF670	2.72446	1.44597	4.97236	3.52597	4.24916	22.6456	3.52279e-18	3.21929e-17	5.01234	4.97028	4.93446	3.62887	3.48045	3.46859
CPQ	2.18397	1.12695	5.87379	4.74721	5.3105	22.6454	3.52362e-18	3.21929e-17	5.87584	5.90715	5.83838	4.72974	4.73794	4.77396
VGLL4	2.58188	1.36842	5.20689	3.83855	4.52272	22.6431	3.53211e-18	3.2249e-17	5.26176	5.21729	5.14161	3.90581	3.77355	3.83629
WASF3	2.16158	1.11209	6.26812	5.15558	5.71185	22.6273	3.59144e-18	3.26821e-17	6.2515	6.22871	6.32415	5.20965	5.09062	5.16647
SMG8	2.52423	1.33585	5.43283	4.09739	4.76511	22.6223	3.61029e-18	3.28102e-17	5.47939	5.48492	5.33417	4.15031	4.05549	4.08639
ZNF777	2.42851	1.28007	5.84992	4.57087	5.21039	22.5806	3.77298e-18	3.41983e-17	5.89103	5.88954	5.76918	4.46542	4.59255	4.65463
RYBP	2.47167	1.30549	6.39454	5.08903	5.74179	22.5564	3.87102e-18	3.49716e-17	6.42798	6.43091	6.32473	5.22381	4.93125	5.11204
PLEKHA3	2.35991	1.23873	5.51033	4.27198	4.89116	22.5493	3.90007e-18	3.52108e-17	5.52976	5.54988	5.45136	4.25778	4.31836	4.23981
ZNF324B	5.48908	2.45657	3.57597	1.11919	2.34758	22.5479	3.90592e-18	3.52405e-17	3.57889	3.61338	3.53563	1.24559	1.00038	1.11158
ARL6IP5	2.06053	1.04301	7.2348	6.192	6.7134	22.5284	3.98724e-18	3.59035e-17	7.23419	7.24856	7.22165	6.18965	6.09317	6.29317
SMIM12	2.43368	1.28314	5.41411	4.13146	4.77279	22.4577	4.29816e-18	3.83513e-17	5.47436	5.42812	5.33987	4.09703	4.17381	4.12355
SLC25A25	2.52643	1.3371	5.283	3.94671	4.61485	22.4388	4.38553e-18	3.90548e-17	5.23225	5.37322	5.24353	3.90581	3.95737	3.97694
WHAMM	3.01335	1.59137	4.75814	3.16751	3.96282	22.4348	4.40406e-18	3.91728e-17	4.78403	4.83577	4.65462	3.14944	3.25452	3.09857
ZNF768	2.50849	1.32682	5.93534	4.60902	5.27218	22.4347	4.40449e-18	3.91728e-17	6.0436	5.96153	5.8009	4.60299	4.66521	4.55885
XXbac-BPG252P9.9	26.4877	4.72725	3.36284	-1.36179	1.00053	22.4292	4.43062e-18	3.9341e-17	3.37792	3.54379	3.16681	-1.41302	-1.30587	-1.36647
IFFO1	2.22485	1.15371	6.09326	4.93964	5.51645	22.4213	4.46794e-18	3.96346e-17	6.10156	6.05466	6.12357	4.8484	5.01558	4.95494
MECP2	2.10134	1.07131	6.68318	5.61196	6.14757	22.3992	4.57443e-18	4.04487e-17	6.72104	6.72245	6.60607	5.68139	5.57711	5.57739
PIGM	2.78775	1.4791	5.40402	3.92461	4.66432	22.3909	4.61474e-18	4.07511e-17	5.41674	5.45431	5.341	4.09703	3.79643	3.88037
OR2W3	4.13221	2.04691	3.86624	1.81933	2.84278	22.3867	4.63545e-18	4.08084e-17	3.92427	3.81649	3.85796	1.82838	1.73735	1.89227
DDX47	6.60433	2.72341	3.58946	0.867238	2.22835	22.3866	4.63619e-18	4.08084e-17	3.6449	3.66948	3.45399	0.824014	1.01606	0.761637
SOCS6	2.49852	1.32107	5.67819	4.35742	5.0178	22.3758	4.68982e-18	4.12038e-17	5.70243	5.70473	5.62741	4.41842	4.21515	4.43868
ZNF790	2.87937	1.52575	4.60132	3.07569	3.83851	22.3537	4.80165e-18	4.2052e-17	4.55143	4.64433	4.60819	3.10695	3.01411	3.10602
EIF4A1	3.06771	1.61716	4.54688	2.93	3.73844	22.3492	4.82481e-18	4.22199e-17	4.62232	4.54661	4.47173	2.91096	3.00628	2.87276
RUNX1T1	2.56687	1.36001	5.53946	4.17906	4.85926	22.3488	4.82697e-18	4.22199e-17	5.51611	5.4573	5.64499	4.08978	4.24706	4.20035
PRKRIR	2.00266	1.00192	7.71204	6.71026	7.21115	22.3437	4.85314e-18	4.24218e-17	7.69758	7.77064	7.66792	6.76589	6.61316	6.75173
CAMSAP2	2.03903	1.02788	7.95353	6.92553	7.43953	22.3234	4.9593e-18	4.32671e-17	7.96279	7.96249	7.9353	7.03713	6.81013	6.92933
DNAJC3-AS1	4.06589	2.02357	3.92162	1.89822	2.90992	22.3222	4.96571e-18	4.32955e-17	4.01581	3.90386	3.8452	1.92122	1.88982	1.88363
PRDM1	5.07905	2.34456	4.19411	1.85097	3.02254	22.3005	5.08252e-18	4.41739e-17	4.26235	4.33742	3.98256	1.92937	1.78389	1.83964
GNB1L	3.17679	1.66757	4.45732	2.79	3.62366	22.2945	5.11517e-18	4.44015e-17	4.47486	4.39054	4.50657	2.69371	2.78618	2.89011
UBE3A	2.13415	1.09366	7.05077	5.95692	6.50384	22.2882	5.14977e-18	4.46173e-17	7.08827	7.03227	7.03176	6.05877	5.83479	5.97719
BRD1	2.08853	1.06249	6.25904	5.19651	5.72778	22.2865	5.15917e-18	4.46425e-17	6.30125	6.2553	6.22057	5.24519	5.15755	5.1868
MDM4	2.13444	1.09386	6.05105	4.95746	5.50426	22.2405	5.41946e-18	4.67182e-17	6.05038	6.08463	6.01815	4.92683	5.01558	4.92999
HMGCS1	2.0878	1.06198	6.82067	5.75839	6.28953	22.2362	5.44502e-18	4.69091e-17	6.79961	6.78767	6.87472	5.81552	5.65992	5.79973
RP11-175O19.4	3.4566	1.78935	4.49016	2.70192	3.59604	22.2343	5.45608e-18	4.69749e-17	4.50677	4.50866	4.45504	2.52647	2.88769	2.6916
ZNF79	5.66391	2.5018	4.45461	1.95444	3.20453	22.2263	5.50313e-18	4.72911e-17	4.45251	4.68062	4.23072	1.97733	2.0734	1.81259
ZNF764	3.30069	1.72277	4.45407	2.73232	3.5932	22.2144	5.5739e-18	4.77798e-17	4.53218	4.50674	4.32329	2.73614	2.70627	2.75455
PIK3R1	2.26562	1.1799	5.96201	4.7823	5.37216	22.1955	5.6877e-18	4.86434e-17	5.91575	6.03544	5.93483	4.84302	4.70445	4.79944
MGA	2.04786	1.03412	7.07899	6.04455	6.56177	22.1858	5.74759e-18	4.9024e-17	7.06368	7.0469	7.12637	6.12414	5.94948	6.06004
CHST14	2.23724	1.16172	6.2329	5.07164	5.65227	22.182	5.77103e-18	4.91934e-17	6.32549	6.24899	6.12423	5.06548	5.07011	5.07932
ZBTB43	2.72991	1.44886	4.87782	3.42925	4.15353	22.158	5.92158e-18	5.02895e-17	4.94988	4.89138	4.7922	3.47311	3.38706	3.42758
PHKG1	9.9591	3.31601	3.36826	0.0512098	1.70973	22.1486	5.98212e-18	5.06783e-17	3.44943	3.19297	3.46236	-0.0345133	0.0545369	0.133606
INO80	2.09576	1.06747	6.16918	5.10173	5.63545	22.132	6.09017e-18	5.14668e-17	6.1729	6.19924	6.1354	5.15857	5.06069	5.08592
TSPYL2	2.19089	1.13152	6.47831	5.34735	5.91283	22.1172	6.18786e-18	5.2164e-17	6.49662	6.53698	6.40132	5.27587	5.44215	5.32403
MRFAP1L1	2.00863	1.00621	6.64812	5.64218	6.14515	22.0974	6.3213e-18	5.3126e-17	6.6585	6.69737	6.58848	5.66379	5.60589	5.65685
ZNF597	6.67433	2.73862	3.67971	0.942326	2.31102	22.0854	6.40356e-18	5.35879e-17	3.82968	3.63467	3.57478	0.925298	0.760806	1.14087
VDAC2	2.04916	1.03503	6.46879	5.43358	5.95119	22.0716	6.50003e-18	5.4329e-17	6.50059	6.45206	6.45372	5.44957	5.48855	5.36262
RP11-379H18.1	2.25733	1.17461	5.82288	4.64863	5.23575	22.0657	6.54111e-18	5.4606e-17	5.82455	5.89617	5.74793	4.6835	4.64896	4.61343
B3GALT6	2.41791	1.27376	5.49788	4.22498	4.86143	22.0434	6.70091e-18	5.58382e-17	5.55191	5.51585	5.42589	4.15205	4.21854	4.30434
CNST	2.29016	1.19545	5.89245	4.6967	5.29457	22.0191	6.87926e-18	5.71857e-17	5.89179	5.88806	5.89749	4.79141	4.58074	4.71796
GRPEL2	2.3889	1.25635	5.4204	4.16431	4.79235	22.0158	6.90376e-18	5.732e-17	5.39133	5.49077	5.3791	4.17794	4.21175	4.10323
HSPA4L	2.82059	1.496	4.91464	3.41933	4.16698	22.0125	6.92845e-18	5.74903e-17	4.92205	4.97585	4.846	3.46191	3.29043	3.50566
TRIM35	2.2352	1.1604	5.98146	4.82062	5.40104	21.9918	7.0856e-18	5.87233e-17	6.04632	5.91804	5.98001	4.88762	4.75088	4.82336
RGMB-AS1	2.19883	1.13673	5.85333	4.71637	5.28485	21.9333	7.54988e-18	6.20843e-17	5.84263	5.87097	5.8464	4.79921	4.65398	4.69593
NR1D2	2.14298	1.09962	6.27072	5.17089	5.7208	21.927	7.60184e-18	6.24742e-17	6.22597	6.30872	6.27745	5.26061	5.10169	5.15036
FLRT3	2.08064	1.05703	7.45475	6.39773	6.92624	21.923	7.63448e-18	6.26301e-17	7.44751	7.46314	7.45359	6.45857	6.2572	6.47741
RNF25	2.27565	1.18628	5.71203	4.52641	5.11922	21.9135	7.71348e-18	6.31631e-17	5.72719	5.73298	5.67593	4.43139	4.57413	4.5737
ALKBH4	2.42399	1.27738	5.12728	3.84997	4.48863	21.8988	7.83842e-18	6.39974e-17	5.17755	5.12123	5.08307	3.86814	3.84772	3.83405
C1orf174	2.24201	1.16479	5.57798	4.4127	4.99534	21.8934	7.88454e-18	6.43358e-17	5.59522	5.52348	5.61525	4.42852	4.42499	4.3846
STX1A	3.19756	1.67697	4.99989	3.32326	4.16158	21.8712	8.07664e-18	6.56693e-17	5.09992	5.05696	4.8428	3.37208	3.42279	3.17491
TET2	2.66598	1.41466	6.25705	4.84174	5.54939	21.867	8.11441e-18	6.59374e-17	6.26206	6.27012	6.23897	5.05807	4.65398	4.81316
ZFHX4	2.51194	1.3288	6.14183	4.81215	5.47699	21.859	8.1847e-18	6.63908e-17	6.13065	6.13157	6.16328	5.00507	4.67389	4.75751
ZBED4	2.11861	1.08312	6.48051	5.39714	5.93882	21.8556	8.21541e-18	6.65673e-17	6.48916	6.44555	6.50682	5.45734	5.28841	5.44566
RP11-177H13.2	4.40883	2.1404	3.70978	1.56808	2.63893	21.8378	8.37642e-18	6.77061e-17	3.66977	3.68997	3.7696	1.68169	1.50149	1.52106
KLF10	2.04989	1.03555	6.33495	5.29944	5.8172	21.8055	8.6763e-18	6.98015e-17	6.37657	6.30872	6.31955	5.30983	5.23915	5.34935
VGF	2.7107	1.43867	4.77314	3.33387	4.0535	21.7735	8.98545e-18	7.19936e-17	4.73941	4.77953	4.80048	3.37506	3.39607	3.23047
POLG	2.05244	1.03734	6.13179	5.09448	5.61314	21.7689	9.03024e-18	7.23103e-17	6.10742	6.12594	6.162	5.05062	5.12357	5.10927
SYVN1	2.09054	1.06388	6.26719	5.20321	5.7352	21.7665	9.05424e-18	7.24181e-17	6.20425	6.28703	6.3103	5.18348	5.26235	5.1638
RPRD2	2.06269	1.04453	6.23933	5.19484	5.71708	21.7355	9.36711e-18	7.46165e-17	6.24974	6.27634	6.1919	5.25008	5.17512	5.15933
BTAF1	2.2633	1.17843	6.92362	5.74538	6.3345	21.7198	9.52894e-18	7.56862e-17	6.89763	7.01984	6.85339	5.85135	5.61171	5.77308
C8orf58	2.3576	1.23732	5.81149	4.57472	5.19311	21.7191	9.53675e-18	7.57045e-17	5.86203	5.85744	5.71501	4.53518	4.67141	4.51757
KDM6B	2.10924	1.07672	6.16322	5.08671	5.62496	21.7105	9.62673e-18	7.63746e-17	6.18033	6.1409	6.16841	5.00024	5.14601	5.11389
NID2	2.03321	1.02376	6.46002	5.43634	5.94818	21.7059	9.67516e-18	7.66772e-17	6.508	6.4729	6.39915	5.48387	5.39645	5.42869
CYP1B1	3.04233	1.60517	4.36267	2.75797	3.56032	21.7058	9.67602e-18	7.66772e-17	4.38544	4.40713	4.29544	2.79977	2.68681	2.78734
FADD	2.70404	1.43512	4.67338	3.23806	3.95572	21.698	9.75937e-18	7.71153e-17	4.73773	4.64433	4.63808	3.26987	3.2379	3.20642
FDXR	2.16703	1.11572	5.99176	4.87654	5.43415	21.6953	9.78813e-18	7.72537e-17	5.99452	6.01393	5.96683	4.78581	4.94565	4.89818
PEX12	3.39529	1.76353	4.05569	2.29131	3.1735	21.6881	9.86646e-18	7.76934e-17	4.08877	4.00271	4.07558	2.32497	2.32703	2.22193
PPP1R3C	2.16121	1.11184	5.97369	4.86131	5.4175	21.6818	9.93442e-18	7.8139e-17	5.94879	5.9267	6.04558	4.90219	4.8128	4.86893
ZNF45	2.22966	1.15682	5.74534	4.58906	5.1672	21.6779	9.97749e-18	7.84329e-17	5.71358	5.80831	5.71413	4.57987	4.53521	4.65209
MAPK6	2.04285	1.03059	7.81974	6.78912	7.30443	21.6753	1.00056e-17	7.85636e-17	7.83254	7.83625	7.79044	6.88697	6.65351	6.82688
BLOC1S2	2.06743	1.04784	6.46063	5.41315	5.93689	21.6353	1.04555e-17	8.16767e-17	6.51635	6.44906	6.41649	5.37693	5.36923	5.49329
THSD1	3.03696	1.60263	5.20922	3.60765	4.40844	21.6218	1.0611e-17	8.27499e-17	5.21304	5.37428	5.04035	3.65859	3.62806	3.53629
C16orf70	2.272	1.18396	5.44657	4.26322	4.85489	21.6166	1.06721e-17	8.30852e-17	5.44172	5.49369	5.40432	4.21841	4.28153	4.2897
TBCEL	2.35191	1.23384	5.94395	4.70992	5.32693	21.612	1.07267e-17	8.3463e-17	5.96898	5.9086	5.95426	4.77906	4.55815	4.79254
ZNF598	2.12583	1.08803	6.31487	5.22698	5.77092	21.6097	1.07541e-17	8.35819e-17	6.3592	6.31808	6.26733	5.19198	5.32428	5.16469
DNAJC30	3.0735	1.61988	4.58497	2.96562	3.7753	21.5616	1.13382e-17	8.76256e-17	4.65116	4.60531	4.49844	2.90684	3.10856	2.88146
REV3L	2.05185	1.03692	7.68119	6.64426	7.16273	21.5562	1.1407e-17	8.81079e-17	7.67779	7.71174	7.65404	6.73977	6.50653	6.68649
ZNF2	3.0569	1.61207	4.35076	2.73959	3.54518	21.551	1.14721e-17	8.85608e-17	4.40885	4.35035	4.29309	2.64998	2.79074	2.77804
ZKSCAN2	2.51882	1.33275	5.06269	3.72975	4.39622	21.5379	1.16396e-17	8.97029e-17	5.10775	5.07395	5.00638	3.81854	3.69779	3.67292
CHMP2B	2.14179	1.09882	6.14958	5.05064	5.60011	21.516	1.19235e-17	9.17875e-17	6.16354	6.13157	6.15362	5.1038	4.94258	5.10556
ZNF335	2.09403	1.06629	6.47977	5.4133	5.94654	21.5137	1.19539e-17	9.19703e-17	6.51586	6.41664	6.50682	5.35743	5.5067	5.37577
C19orf53	2.00027	1.00019	7.07118	6.07137	6.57128	21.5124	1.19716e-17	9.20548e-17	7.11343	7.11919	6.98092	6.02589	6.13011	6.05812
RP11-214O1.2	5.32112	2.41173	4.02994	1.61967	2.82481	21.4931	1.22296e-17	9.38808e-17	4.08349	4.18698	3.81935	1.72916	1.50149	1.62837
NSDHL	2.24708	1.16805	5.65972	4.49184	5.07578	21.4837	1.23578e-17	9.47592e-17	5.68859	5.62096	5.66961	4.40387	4.55547	4.51618
FAM199X	2.32292	1.21594	6.9937	5.77757	6.38563	21.4768	1.24521e-17	9.54289e-17	6.95585	7.03126	6.99398	5.92045	5.59484	5.81742
RAB8B	2.27136	1.18356	7.24496	6.06127	6.65312	21.467	1.25887e-17	9.61008e-17	7.23061	7.23322	7.27106	6.15791	5.87081	6.15508
TRIM11	2.36308	1.24067	5.65358	4.41335	5.03347	21.4635	1.26373e-17	9.64183e-17	5.72719	5.64389	5.58968	4.33498	4.51742	4.38766
ANKHD1	4.89793	2.29217	3.57182	1.27837	2.42509	21.4628	1.26462e-17	9.64329e-17	3.52148	3.55128	3.64269	1.40606	1.15002	1.27904
CHST3	2.05852	1.04161	6.49391	5.45289	5.9734	21.45	1.28269e-17	9.75938e-17	6.49414	6.57649	6.41109	5.426	5.46518	5.46751
CSF1	2.46357	1.30075	6.51256	5.21297	5.86277	21.4071	1.34528e-17	1.01904e-16	6.56025	6.63445	6.34299	5.12613	5.28275	5.23004
ZNF383	3.07648	1.62128	4.39782	2.77667	3.58725	21.4012	1.354e-17	1.02507e-16	4.38115	4.41946	4.39286	2.83923	2.62679	2.864
ZNF329	2.53844	1.34394	4.91234	3.56859	4.24046	21.4003	1.35536e-17	1.02507e-16	4.93383	4.93495	4.86824	3.62134	3.48609	3.59833
BLOC1S4	2.83339	1.50253	4.72478	3.22291	3.97384	21.3997	1.35637e-17	1.02518e-16	4.82098	4.74893	4.60441	3.23083	3.2177	3.22021
KIAA2018	2.99675	1.5834	4.81338	3.2294	4.02139	21.3982	1.35856e-17	1.02628e-16	4.90419	4.75543	4.78053	3.36007	3.064	3.26414
SPTBN2	3.57463	1.83779	3.98672	2.1494	3.06806	21.3845	1.37948e-17	1.03979e-16	3.96216	3.95555	4.04245	2.04641	2.13932	2.26247
CTD-2334D19.1	13.0363	3.70446	3.19022	-0.516541	1.33684	21.3749	1.39429e-17	1.04865e-16	3.07686	3.27663	3.21717	-0.0993645	-0.682429	-0.76783
FAM60A	2.04632	1.03303	6.51534	5.48269	5.99901	21.352	1.43011e-17	1.07325e-16	6.48316	6.60284	6.46001	5.50924	5.43706	5.50178
MIR4453	3.29885	1.72196	4.07781	2.35518	3.2165	21.3474	1.43759e-17	1.07768e-16	4.11229	4.05103	4.07011	2.39138	2.41837	2.25579
C16orf87	2.63351	1.39699	5.17597	3.77983	4.4779	21.3409	1.44793e-17	1.08366e-16	5.19846	5.2464	5.08307	3.81634	3.65586	3.86729
LINS	2.53007	1.33918	4.91796	3.57789	4.24792	21.3317	1.46291e-17	1.09309e-16	4.9309	4.8676	4.95537	3.64381	3.5814	3.50847
RSBN1	2.50027	1.32208	5.46652	4.14507	4.8058	21.3291	1.46716e-17	1.09507e-16	5.4824	5.56936	5.3478	4.21508	4.09109	4.12904
RP11-661O13.1	32.5328	5.02383	2.89249	-2.12986	0.381316	21.3149	1.4905e-17	1.11129e-16	2.77669	3.0733	2.82748	-2.14999	-1.99176	-2.24782
FAM126B	2.34627	1.23037	5.45975	4.229	4.84438	21.3101	1.49841e-17	1.11537e-16	5.43759	5.48296	5.4587	4.3411	4.14557	4.20035
MEF2A	2.04907	1.03497	6.02837	4.99326	5.51082	21.2948	1.52428e-17	1.13156e-16	6.01823	6.04872	6.01815	5.05062	4.96396	4.96522
RP11-440D17.3	2.90256	1.53732	4.5078	2.97122	3.73951	21.2512	1.60029e-17	1.18351e-16	4.52246	4.55221	4.44873	2.99102	2.86189	3.06076
TRMT11	2.35423	1.23526	5.50641	4.27114	4.88877	21.2091	1.67742e-17	1.23789e-16	5.46424	5.5149	5.54009	4.30397	4.15268	4.35678
ZBTB17	2.44582	1.29032	5.90271	4.61341	5.25806	21.2083	1.67896e-17	1.23836e-16	5.93933	6.02001	5.74878	4.58762	4.66023	4.59237
EPC1	2.15769	1.10949	5.63524	4.52539	5.08031	21.1869	1.71961e-17	1.26427e-16	5.66404	5.59946	5.64223	4.57598	4.48679	4.51338
PAPD5	2.3359	1.22398	5.44025	4.21611	4.82818	21.1754	1.7419e-17	1.2786e-16	5.42824	5.44429	5.4482	4.28821	4.09847	4.26164
PTPN14	2.01404	1.01009	8.57731	7.56695	8.07213	21.1727	1.74729e-17	1.28119e-16	8.56765	8.51567	8.64861	7.67603	7.44568	7.57914
TNFSF4	3.89537	1.96176	4.11166	2.14908	3.13037	21.1659	1.7605e-17	1.29019e-16	4.0514	4.16763	4.11596	2.35554	1.94001	2.15171
AC005546.2	23.6633	4.56458	2.60835	-1.95778	0.325283	21.1582	1.7759e-17	1.30078e-16	2.65383	2.52301	2.64821	-1.89845	-1.87146	-2.10343
SCG5	7.81181	2.96566	3.44323	0.478153	1.96069	21.1512	1.78988e-17	1.30823e-16	3.47788	3.39782	3.45399	0.199159	0.885561	0.349739
REST	2.10371	1.07294	6.40415	5.331	5.86758	21.148	1.79629e-17	1.31152e-16	6.37926	6.44555	6.38765	5.44318	5.24914	5.30069
C1orf52	2.38308	1.25283	5.68125	4.42918	5.05521	21.1233	1.84669e-17	1.34475e-16	5.75319	5.72886	5.56169	4.44851	4.34964	4.48938
FBXO31	2.32315	1.21608	5.17988	3.96337	4.57163	21.1143	1.8656e-17	1.35708e-16	5.21062	5.13997	5.18906	3.98027	3.9994	3.91045
BICD1	2.51005	1.32771	5.04106	3.71296	4.37701	21.1074	1.88001e-17	1.36539e-16	5.0682	4.99382	5.06118	3.77397	3.59972	3.76517
PIGA	2.74393	1.45624	5.01299	3.55676	4.28488	21.1017	1.89219e-17	1.37279e-16	4.97005	5.09587	4.97307	3.69251	3.4169	3.56089
ZNF202	2.1447	1.10078	5.89125	4.79034	5.34079	21.0882	1.92102e-17	1.39223e-16	5.93567	5.9013	5.83677	4.86655	4.76719	4.73727
XIAP	2.5293	1.33874	6.34611	5.00664	5.67637	21.0772	1.9451e-17	1.40524e-16	6.30352	6.35543	6.37938	5.20882	4.81951	4.99159
ZSCAN21	2.50526	1.32496	4.78432	3.45876	4.12154	21.0686	1.96396e-17	1.41663e-16	4.77095	4.76672	4.81527	3.51433	3.44033	3.42162
PER1	2.51764	1.33207	5.00571	3.67346	4.33959	21.0567	1.99041e-17	1.4327e-16	5.07885	4.94918	4.9891	3.63884	3.75964	3.62189
GDNF	2.36017	1.23889	5.4548	4.21647	4.83564	21.0519	2.00135e-17	1.43982e-16	5.44481	5.52728	5.39231	4.17622	4.3152	4.15799
TBX3	2.52546	1.33655	5.85265	4.51714	5.18489	21.0317	2.04726e-17	1.47208e-16	5.95748	5.92093	5.67953	4.52176	4.46268	4.56697
PDZRN3	2.40604	1.26666	5.40842	4.14103	4.77472	21.0246	2.06388e-17	1.48286e-16	5.47032	5.36263	5.39231	4.26424	4.07246	4.08639
TRIM27	2.02156	1.01547	6.56323	5.5474	6.05531	21.0117	2.09416e-17	1.50101e-16	6.52903	6.50216	6.65849	5.51602	5.57446	5.55171
LAMC2	3.69869	1.88701	3.93451	2.0457	2.99011	21.0112	2.09514e-17	1.50101e-16	3.88536	3.90678	4.01139	2.17537	2.03543	1.92631
PCDHB10	3.07078	1.6186	4.30895	2.691	3.49997	20.9699	2.19528e-17	1.56785e-16	4.38115	4.25731	4.28839	2.57404	2.74442	2.75455
RASL11A	7.3522	2.87818	3.06383	0.186506	1.62517	20.9673	2.20167e-17	1.57121e-16	3.07686	3.13935	2.97526	0.225876	0.171182	0.162461
RP11-370I10.6	3.3928	1.76248	4.76137	2.99902	3.88019	20.9465	2.25411e-17	1.60319e-16	4.75111	4.87656	4.65644	3.20421	2.79074	3.0021
GMEB1	2.72407	1.44576	4.62808	3.18154	3.90481	20.9418	2.26612e-17	1.6109e-16	4.57043	4.6089	4.7049	3.19071	3.24789	3.10602
KMT2B	2.1001	1.07046	7.4891	6.41872	6.95391	20.9092	2.3516e-17	1.66735e-16	7.55989	7.4989	7.40852	6.39966	6.54791	6.30858
THG1L	2.1902	1.13107	5.34651	4.21536	4.78094	20.8957	2.38785e-17	1.6887e-16	5.33135	5.33796	5.37023	4.19494	4.2404	4.21075
ZNF785	3.42996	1.77819	4.09872	2.32115	3.20993	20.875	2.44437e-17	1.72778e-16	4.12262	4.09523	4.07831	2.18901	2.4987	2.27574
FGF12	16.4059	4.03615	2.83209	-1.20516	0.813464	20.855	2.50054e-17	1.76385e-16	2.76354	2.793	2.93971	-1.05045	-1.56112	-1.0039
ZBTB11	2.41258	1.27058	6.24646	4.97542	5.61094	20.8435	2.53356e-17	1.78623e-16	6.21937	6.30872	6.21128	5.16893	4.857	4.90032
HSPA2	29.9328	4.90366	2.70024	-2.20344	0.248402	20.8416	2.53892e-17	1.78909e-16	2.61776	2.68827	2.79469	-2.14999	-2.60843	-1.85189
MKX	2.27374	1.18507	6.00638	4.82054	5.41346	20.8079	2.63833e-17	1.84983e-16	6.05579	5.91151	6.05184	4.91456	4.70687	4.8402
ZNF227	2.50086	1.32242	5.06789	3.74599	4.40694	20.8078	2.63857e-17	1.84983e-16	4.97861	5.17915	5.04593	3.75575	3.74795	3.73427
SLC25A38	2.36349	1.24092	4.90662	3.66579	4.2862	20.8055	2.64535e-17	1.85364e-16	4.9309	4.89727	4.89168	3.65368	3.67327	3.67041
BCL7A	2.31655	1.21198	5.26502	4.05313	4.65907	20.7939	2.68076e-17	1.87463e-16	5.32465	5.2738	5.19661	4.10964	4.01704	4.0327
ZKSCAN4	3.37005	1.75277	3.97776	2.22467	3.10122	20.7913	2.68854e-17	1.87911e-16	3.92427	3.98624	4.02276	2.18901	2.3333	2.15171
WDR47	2.0932	1.06571	5.58962	4.52402	5.05682	20.7851	2.70779e-17	1.8916e-16	5.56523	5.61204	5.59159	4.51906	4.52154	4.53146
FBXO33	2.36218	1.24012	5.19023	3.95034	4.57028	20.7732	2.74455e-17	1.91242e-16	5.21786	5.19953	5.1533	3.99005	3.84991	4.01105
FOXN2	2.54483	1.34757	6.26378	4.91618	5.58998	20.7607	2.7842e-17	1.93612e-16	6.23968	6.29875	6.25292	5.04781	4.68128	5.01946
LIG4	2.31459	1.21076	5.73284	4.52192	5.12738	20.7312	2.87951e-17	1.99231e-16	5.73563	5.70473	5.75817	4.57858	4.37114	4.61604
ITPRIPL2	2.82518	1.49834	6.18436	4.68508	5.43472	20.7212	2.91237e-17	2.01138e-16	6.23314	6.19506	6.12489	4.964	4.52291	4.56832
BDP1	2.28897	1.1947	7.00701	5.81202	6.40951	20.7193	2.91883e-17	2.01343e-16	6.98729	6.99742	7.03632	5.94478	5.61171	5.87956
TMEM68	2.28981	1.19523	5.4082	4.21335	4.81077	20.7096	2.95137e-17	2.03486e-16	5.42616	5.4563	5.34214	4.26585	4.12764	4.24656
TMEM55B	2.01957	1.01405	6.11673	5.1027	5.60971	20.6833	3.04171e-17	2.09085e-16	6.15224	6.10575	6.0922	5.0802	5.17337	5.05451
ZNF628	2.86598	1.51903	4.34487	2.82561	3.58524	20.6803	3.05205e-17	2.09691e-16	4.41307	4.26643	4.35513	2.78637	2.85755	2.83292
PDE4D	3.72994	1.89915	3.99138	2.09308	3.04223	20.67	3.08819e-17	2.11805e-16	4.00188	4.10797	3.86429	2.11947	2.16768	1.99209
SETD8	2.01719	1.01235	5.93187	4.91944	5.42565	20.6698	3.08899e-17	2.11805e-16	5.93493	5.90715	5.95352	4.88448	4.96497	4.90886
BRPF1	2.45069	1.29319	5.31032	4.01792	4.66412	20.6617	3.11782e-17	2.13356e-16	5.3924	5.35837	5.1802	3.99976	4.06494	3.98907
SNHG16	2.18093	1.12494	5.85399	4.72943	5.29171	20.6067	3.32071e-17	2.25667e-16	5.84965	5.94315	5.76918	4.79029	4.69839	4.69962
ZNF439	2.67116	1.41746	4.48792	3.07071	3.77931	20.6055	3.32534e-17	2.2587e-16	4.50282	4.53344	4.4275	3.10335	3.07901	3.02977
RPS3A	2.30263	1.20328	5.28733	4.08486	4.6861	20.6037	3.33236e-17	2.26235e-16	5.26992	5.37428	5.21779	4.05853	4.10215	4.0939
SF3B5	2.01134	1.00815	6.91961	5.91203	6.41582	20.6015	3.34082e-17	2.26697e-16	6.97416	6.93727	6.8474	5.81387	5.92737	5.99485
PGF	2.31157	1.20887	7.12418	5.91606	6.52012	20.5911	3.38097e-17	2.2907e-16	7.20561	7.22477	6.94215	5.8449	6.00161	5.90166
RP4-584D14.5	4.82979	2.27196	3.54774	1.27713	2.41244	20.5854	3.40303e-17	2.3035e-16	3.42877	3.65913	3.55534	1.16505	1.3612	1.30515
GSPT2	2.21924	1.15007	5.38581	4.23603	4.81092	20.5788	3.42906e-17	2.31656e-16	5.37738	5.44931	5.33074	4.27067	4.23706	4.20035
RIT1	2.14914	1.10376	5.45711	4.35329	4.9052	20.4731	3.87331e-17	2.60006e-16	5.47335	5.45929	5.43868	4.4024	4.29445	4.36301
ZNF143	2.35529	1.23591	5.12055	3.88519	4.50287	20.4423	4.01345e-17	2.68103e-16	5.15382	5.15356	5.05427	3.90374	3.80774	3.94408
PRKX	2.0984	1.06929	6.14832	5.07971	5.61401	20.4147	4.14361e-17	2.75887e-16	6.14908	6.24265	6.05323	5.09296	5.03783	5.10834
ZXDB	2.36149	1.2397	4.9611	3.7213	4.3412	20.4086	4.17305e-17	2.77551e-16	4.98003	4.94493	4.95834	3.76033	3.64076	3.76282
C15orf39	2.26088	1.17688	5.35046	4.17402	4.76224	20.4018	4.2061e-17	2.79478e-16	5.42407	5.36688	5.26044	4.18476	4.16152	4.17579
PCDHGC5	4.37398	2.12895	3.9757	1.84593	2.91081	20.4012	4.20922e-17	2.7955e-16	3.95639	4.05367	3.91704	1.92122	2.0734	1.54317
NOP10	2.21464	1.14707	6.28205	5.13597	5.70901	20.3962	4.23347e-17	2.81025e-16	6.3394	6.33769	6.16905	5.07286	5.08134	5.2537
ZFP37	3.21512	1.68487	4.01969	2.33586	3.17778	20.3691	4.36873e-17	2.88887e-16	4.03508	4.07978	3.94421	2.33728	2.25617	2.41414
C19orf47	2.06077	1.04318	5.80077	4.75733	5.27905	20.3605	4.41242e-17	2.91216e-16	5.84107	5.77194	5.78929	4.77228	4.80379	4.69593
ZNF189	2.48223	1.31164	4.855	3.54401	4.1995	20.3456	4.4896e-17	2.96025e-16	4.8678	4.91333	4.78387	3.57274	3.46625	3.59304
RP11-876N24.4	7.38028	2.88368	3.21315	0.331242	1.7722	20.3392	4.52301e-17	2.97942e-16	3.22327	3.3557	3.06049	0.423476	0.171182	0.399067
YAF2	2.50214	1.32316	4.87932	3.55605	4.21769	20.3245	4.60114e-17	3.02308e-16	4.88004	4.89286	4.86508	3.64381	3.42866	3.59568
SGTB	2.02685	1.01924	6.27043	5.25108	5.76075	20.3137	4.65941e-17	3.05463e-16	6.2085	6.33009	6.2727	5.33152	5.20193	5.21978
RP11-723O4.2	7.19275	2.84654	3.21315	0.366103	1.78963	20.3108	4.67503e-17	3.06049e-16	3.29812	3.04707	3.29426	0.225876	0.379499	0.492934
ZNF780B	2.23775	1.16205	5.68362	4.52092	5.10227	20.2975	4.74776e-17	3.10514e-16	5.66669	5.65088	5.73329	4.62574	4.4028	4.53423
EIF1AD	2.18611	1.12836	5.82733	4.69948	5.2634	20.2965	4.75326e-17	3.10726e-16	5.92168	5.83309	5.72722	4.66043	4.75322	4.68478
KLHL11	4.5327	2.18037	3.72515	1.5442	2.63467	20.2847	4.81911e-17	3.14881e-16	3.78809	3.75947	3.62787	1.7751	1.33643	1.52106
RP11-611L7.1	2.2536	1.17223	5.374	4.20179	4.7879	20.2701	4.902e-17	3.19748e-16	5.452	5.36582	5.3042	4.23001	4.23539	4.13997
WDR20	2.05369	1.03822	5.84017	4.8018	5.32099	20.2699	4.90292e-17	3.19748e-16	5.82376	5.87619	5.82058	4.86761	4.79813	4.73967
ZNF574	2.6073	1.38256	5.15094	3.76892	4.45993	20.2504	5.01601e-17	3.26659e-16	5.16135	5.25673	5.03474	3.80088	3.86081	3.64508
RFK	2.29468	1.19829	4.9791	3.78093	4.38001	20.1802	5.44421e-17	3.52207e-16	5.0165	4.94918	4.9716	3.75346	3.76429	3.82505
FAM127C	2.07896	1.05586	5.65391	4.59806	5.12598	20.1766	5.4675e-17	3.53548e-16	5.68162	5.67335	5.60678	4.65183	4.57942	4.56292
TGS1	2.04513	1.03219	6.51342	5.48139	5.9974	20.1721	5.49661e-17	3.55263e-16	6.54496	6.54684	6.44846	5.56	5.36694	5.51722
RP11-773H22.4	23.771	4.57113	3.02502	-1.5416	0.741709	20.1659	5.53633e-17	3.57494e-16	3.03371	3.24004	2.80131	-1.78742	-1.47092	-1.36647
FXYD5	2.01236	1.00889	6.5471	5.53876	6.04293	20.1592	5.5799e-17	3.59969e-16	6.581	6.59923	6.46106	5.47276	5.62071	5.5228
URB2	2.1596	1.11076	6.16451	5.05364	5.60907	20.1513	5.63159e-17	3.62963e-16	6.14339	6.23917	6.11097	5.18178	5.00677	4.97236
MED26	3.08449	1.62503	4.37463	2.75059	3.56261	20.1267	5.79659e-17	3.72549e-16	4.46271	4.42558	4.23561	2.70324	2.86189	2.68664
CCDC59	2.1122	1.07874	5.65138	4.5731	5.11224	20.1174	5.86016e-17	3.76282e-16	5.66227	5.70221	5.58968	4.5966	4.5119	4.61081
CACTIN-AS1	15.7086	3.97348	2.72651	-1.24391	0.741299	20.1096	5.91437e-17	3.78878e-16	2.77013	2.83654	2.57285	-1.49791	-1.02347	-1.21035
BLOC1S3	2.28011	1.1891	5.39817	4.2098	4.80399	20.1046	5.94908e-17	3.80746e-16	5.3763	5.5024	5.3158	4.19663	4.257	4.17579
AC093323.3	2.33385	1.22271	4.92622	3.70406	4.31514	20.0788	6.13193e-17	3.91902e-16	4.94407	4.97585	4.85875	3.70206	3.70989	3.70024
PTPRE	3.04966	1.60865	4.51442	2.90387	3.70915	20.0592	6.27469e-17	4.00467e-16	4.52246	4.3589	4.66191	2.95554	2.88769	2.86838
MOB1B	2.09507	1.067	6.60955	5.54236	6.07595	20.0343	6.46116e-17	4.10254e-16	6.59823	6.63621	6.59421	5.67171	5.40093	5.55444
PTGER4	2.20848	1.14305	5.17531	4.03209	4.6037	20.0172	6.59303e-17	4.17103e-16	5.20577	5.16945	5.15071	4.08978	3.9895	4.01699
CTD-2231E14.8	25.6967	4.68351	2.93996	-1.74042	0.599768	20.0145	6.61411e-17	4.18244e-16	3.04462	3.08366	2.6916	-1.89845	-1.47092	-1.85189
RHOU	2.7206	1.44393	4.81894	3.37448	4.09671	19.9954	6.76491e-17	4.26994e-16	4.90419	4.79064	4.76199	3.41624	3.49731	3.20988
MRPL16	2.04976	1.03546	5.79583	4.76046	5.27815	19.9825	6.86867e-17	4.32947e-16	5.85585	5.79576	5.73588	4.77567	4.79017	4.71553
CTD-2537I9.12	5.98316	2.58091	3.29236	0.711766	2.00206	19.9585	7.0662e-17	4.44582e-16	3.3474	3.2214	3.30827	0.491115	1.00038	0.6438
SPOPL	2.15781	1.10957	5.82572	4.71557	5.27064	19.9419	7.20624e-17	4.5277e-16	5.78688	5.80831	5.88196	4.81359	4.60427	4.72885
PWWP2A	2.12658	1.08854	5.45669	4.36842	4.91255	19.9375	7.2434e-17	4.54689e-16	5.45302	5.5149	5.40214	4.40533	4.36043	4.33951
PRICKLE2	2.39437	1.25964	4.82485	3.56521	4.19503	19.9351	7.26373e-17	4.55575e-16	4.89819	4.78747	4.78888	3.54648	3.61009	3.53905
IKZF5	2.26967	1.18249	5.20861	4.02543	4.61702	19.9334	7.27874e-17	4.56283e-16	5.22627	5.16945	5.23011	4.12392	3.95127	4.0011
ASF1A	2.02804	1.02009	6.17122	5.15122	5.66122	19.9151	7.43834e-17	4.64803e-16	6.15727	6.19566	6.16071	5.20379	5.03783	5.21204
KCNJ2	2.90748	1.53977	4.28711	2.74664	3.51688	19.9037	7.53895e-17	4.70448e-16	4.22926	4.34605	4.28603	2.87765	2.7159	2.64636
RAB30	2.19996	1.13748	6.53839	5.40057	5.96948	19.9015	7.55909e-17	4.71491e-16	6.52951	6.56174	6.52393	5.56524	5.24082	5.39565
STOX2	2.2487	1.16909	5.23944	4.07006	4.65475	19.896	7.60858e-17	4.73651e-16	5.17258	5.2817	5.26404	4.14682	4.02093	4.04244
ZNF696	2.41658	1.27297	5.09859	3.82506	4.46182	19.8879	7.68123e-17	4.77592e-16	5.14624	5.08559	5.06393	3.9645	3.73379	3.77688
ZNF689	2.3337	1.22262	5.29271	4.07093	4.68182	19.8696	7.84997e-17	4.86543e-16	5.37738	5.32819	5.17257	4.03039	4.11495	4.06745
SRRM5	12.6267	3.65841	3.27489	-0.382799	1.44605	19.8664	7.88014e-17	4.88192e-16	3.3474	3.29011	3.18717	-0.659665	0.279097	-0.76783
LYAR	2.11834	1.08294	5.48987	4.40657	4.94822	19.8481	8.05337e-17	4.98069e-16	5.53557	5.4453	5.48874	4.41552	4.45838	4.34581
AC074117.10	2.29524	1.19865	5.32716	4.1286	4.72788	19.8433	8.09944e-17	5.0065e-16	5.34796	5.37428	5.25924	4.16073	4.21005	4.01501
NEXN-AS1	10.3896	3.37707	2.60472	-0.772059	0.916332	19.7985	8.54251e-17	5.24733e-16	2.51169	2.64695	2.65553	-0.814388	-0.787398	-0.714391
TOB1	2.16254	1.11273	6.05084	4.9382	5.49452	19.7939	8.58852e-17	5.26617e-16	6.08646	6.09042	5.97563	5.04875	4.81504	4.95082
C10orf118	2.12364	1.08654	5.97749	4.8907	5.43409	19.7899	8.62978e-17	5.28911e-16	5.93567	5.98934	6.00746	4.97978	4.76022	4.93209
MRPS24	5.17748	2.37225	3.20729	0.83357	2.02043	19.7837	8.69383e-17	5.32125e-16	3.26585	3.1143	3.24171	0.941508	0.742069	0.817132
TSTA3	2.0107	1.0077	6.29318	5.28606	5.78962	19.7672	8.86682e-17	5.42182e-16	6.31708	6.3549	6.20755	5.23371	5.36158	5.26289
SYT14	3.71572	1.89364	3.747	1.85167	2.79934	19.7356	9.2068e-17	5.60526e-16	3.75527	3.73995	3.74578	2.06132	1.76545	1.72825
NR2F1	8.97901	3.16656	2.6842	-0.481306	1.10144	19.719	9.39088e-17	5.70722e-16	2.70973	2.75462	2.58824	-0.476219	-0.44923	-0.518471
VPS37B	2.00065	1.00047	5.75688	4.75637	5.25662	19.6803	9.83542e-17	5.95106e-16	5.80944	5.74445	5.71676	4.78693	4.74971	4.73247
RP9	2.11991	1.084	5.67789	4.59468	5.13628	19.6702	9.95534e-17	6.01832e-16	5.68336	5.75015	5.60015	4.53518	4.65648	4.59237
CMTR2	2.13247	1.09253	5.91487	4.82197	5.36842	19.6439	1.02737e-16	6.19717e-16	5.86511	5.94315	5.93634	4.93899	4.70808	4.81883
F2RL1	8.01487	3.00268	2.83523	-0.16792	1.33365	19.6404	1.0317e-16	6.21783e-16	2.82178	2.81804	2.86587	-0.0345133	-0.44923	-0.0200175
CCDC9	2.14269	1.09943	5.79158	4.69189	5.24174	19.6216	1.05525e-16	6.34862e-16	5.89103	5.72555	5.75817	4.68711	4.76603	4.62254
KLHL28	2.53804	1.34372	5.51367	4.16885	4.84126	19.5989	1.08435e-16	6.50088e-16	5.51414	5.43623	5.59063	4.32574	3.97353	4.20729
IL4R	2.00027	1.00019	5.78364	4.78346	5.28355	19.5871	1.09992e-16	6.58851e-16	5.80704	5.80284	5.74106	4.81029	4.81728	4.72281
LCLAT1	2.32184	1.21527	5.24335	4.02861	4.63598	19.5813	1.10752e-16	6.62825e-16	5.31229	5.25673	5.16103	4.05853	3.92035	4.10695
ZSCAN9	2.71691	1.44197	4.52918	3.088	3.80859	19.5407	1.16297e-16	6.92989e-16	4.52051	4.49514	4.57189	2.93545	3.1049	3.22364
ATXN7	2.44324	1.2888	4.9815	3.69233	4.33692	19.5298	1.17831e-16	7.0122e-16	4.98287	5.01968	4.94196	3.84248	3.59712	3.63739
DUSP14	2.15167	1.10546	5.22142	4.11544	4.66843	19.5159	1.19821e-16	7.11827e-16	5.24649	5.18276	5.235	4.17622	4.07994	4.09015
RP1-249H1.4	23.5911	4.56017	2.5599	-2.00438	0.277763	19.5115	1.2046e-16	7.15313e-16	2.49588	2.49223	2.6916	-1.49791	-2.26739	-2.24782
CLK3	2.16733	1.11592	5.61867	4.50352	5.06109	19.5094	1.20762e-16	7.16799e-16	5.67724	5.67677	5.502	4.4752	4.5474	4.48796
SNHG5	2.05301	1.03774	5.44457	4.40678	4.92567	19.4732	1.26154e-16	7.45907e-16	5.48841	5.43015	5.41514	4.41842	4.42499	4.37692
MT2A	2.13	1.09085	5.4071	4.31613	4.86161	19.4544	1.29065e-16	7.60802e-16	5.44687	5.42099	5.35344	4.37581	4.32939	4.24319
FAM174A	2.5453	1.34783	4.4678	3.1205	3.79415	19.454	1.29117e-16	7.60802e-16	4.54184	4.4578	4.40377	3.07791	3.15179	3.13178
ZNF624	2.7033	1.43472	4.61845	3.18399	3.90122	19.4312	1.32735e-16	7.80453e-16	4.58358	4.70766	4.56412	3.30475	3.03735	3.20988
RORA	3.72829	1.89851	3.74905	1.84884	2.79894	19.4231	1.3404e-16	7.87111e-16	3.65917	3.68317	3.9048	1.90478	1.80209	1.83964
IPPK	3.82132	1.93407	3.46713	1.53237	2.49975	19.4061	1.36825e-16	8.02681e-16	3.50578	3.46277	3.43283	1.64257	1.49031	1.46425
ICK	2.17105	1.11839	5.81583	4.69681	5.25632	19.3868	1.40058e-16	8.20347e-16	5.83637	5.77274	5.83838	4.82018	4.56083	4.70943
MSANTD2	2.04907	1.03497	5.49363	4.45916	4.97639	19.3665	1.43556e-16	8.38338e-16	5.49538	5.54894	5.43656	4.45275	4.46411	4.46063
ANKRD18B	2.39052	1.25732	5.03772	3.78013	4.40893	19.3593	1.44822e-16	8.44653e-16	4.92796	5.07525	5.10997	3.83164	3.69047	3.81827
ZNF747	2.57268	1.36327	4.41368	3.05078	3.73223	19.3549	1.45594e-16	8.48794e-16	4.4829	4.403	4.35513	3.01036	3.11222	3.02977
PDCL	2.19541	1.13449	5.50802	4.37296	4.94049	19.3279	1.50446e-16	8.74113e-16	5.52295	5.48394	5.51716	4.49455	4.25204	4.3723
RP11-426C22.4	3.61041	1.85216	3.61051	1.75755	2.68403	19.3119	1.53393e-16	8.8898e-16	3.62686	3.59177	3.6129	1.88814	1.6088	1.77571
C7orf60	2.29309	1.1973	4.95069	3.75303	4.35186	19.2955	1.56486e-16	9.04999e-16	4.8846	4.98417	4.98329	3.82947	3.69535	3.73427
FBXO45	2.02744	1.01966	5.52462	4.50504	5.01483	19.2905	1.5745e-16	9.09805e-16	5.57749	5.50047	5.4959	4.50958	4.47408	4.53146
MAFF	2.45449	1.29543	5.22546	3.93141	4.57843	19.2816	1.59163e-16	9.18935e-16	5.30437	5.29847	5.07353	3.84463	4.00137	3.94823
TVP23B	2.08347	1.05899	5.6302	4.57156	5.10088	19.2681	1.61813e-16	9.32642e-16	5.63816	5.65609	5.59635	4.59532	4.46981	4.64954
CNEP1R1	2.10363	1.07288	5.50709	4.43391	4.9705	19.2633	1.62752e-16	9.3729e-16	5.46119	5.50818	5.55191	4.49043	4.34344	4.46787
ZMYM6	2.04691	1.03344	5.46951	4.43586	4.95269	19.2454	1.66345e-16	9.56781e-16	5.46728	5.42914	5.51212	4.42852	4.39682	4.48224
ZNHIT2	3.71196	1.89218	3.56045	1.66956	2.615	19.2303	1.69445e-16	9.72167e-16	3.64131	3.5735	3.46653	1.58181	1.72786	1.69901
RP11-568J23.5	10.9028	3.44663	2.67865	-0.765966	0.95634	19.2248	1.70587e-16	9.77494e-16	2.81542	2.63995	2.58057	-1.05045	-0.584581	-0.662861
HOXB2	2.27836	1.188	5.38047	4.19331	4.78689	19.1794	1.80325e-16	1.02903e-15	5.48841	5.38897	5.26404	4.12392	4.24872	4.20729
CCDC85A	2.19893	1.1368	5.30862	4.17122	4.73992	19.1181	1.94389e-16	1.10239e-15	5.34796	5.27719	5.3007	4.28821	4.08366	4.14178
RP11-490M8.1	3.22657	1.69	3.94706	2.25796	3.10251	19.1023	1.98186e-16	1.12161e-15	3.97647	4.0163	3.8484	2.20253	2.41246	2.15889
PHC3	2.59873	1.37781	6.1667	4.78763	5.47716	19.0953	1.99909e-16	1.1309e-15	6.14656	6.10002	6.25352	5.01563	4.5501	4.79715
RAPH1	3.27579	1.71184	3.97778	2.26427	3.12103	19.0924	2.00609e-16	1.13439e-15	3.92131	3.96958	4.04245	2.46051	2.11039	2.22193
FRMD3	14.1673	3.82449	2.63797	-1.18969	0.724141	19.0834	2.02856e-16	1.14521e-15	2.64669	2.60441	2.66282	-0.927598	-0.900609	-1.74086
RICTOR	2.24618	1.16747	6.73495	5.56751	6.15123	18.9844	2.29157e-16	1.28054e-15	6.69747	6.79083	6.71654	5.69341	5.34848	5.66065
IMP3	2.29308	1.19729	6.03294	4.83696	5.43495	18.9596	2.36302e-16	1.31939e-15	6.10156	6.15325	5.844	4.79587	4.85155	4.86345
RP11-13A1.1	4.12422	2.04412	3.37317	1.32912	2.35114	18.9498	2.39181e-16	1.3333e-15	3.41622	3.41843	3.28485	1.37058	1.43305	1.18373
CCDC43	2.24877	1.16914	4.95649	3.78809	4.37229	18.9396	2.42221e-16	1.34861e-15	4.9857	5.00612	4.87766	3.79197	3.73379	3.83852
ZNF230	2.78835	1.47941	4.22145	2.74303	3.48224	18.9174	2.48965e-16	1.38223e-15	4.2763	4.26416	4.1239	2.75919	2.63697	2.83292
AC068580.5	14.6205	3.86992	2.28877	-1.58196	0.353408	18.8926	2.5672e-16	1.4207e-15	2.30947	2.27437	2.28249	-1.58811	-1.30587	-1.85189
FBXW5	2.04715	1.03362	5.5155	4.48241	4.99896	18.8848	2.59219e-16	1.43337e-15	5.58498	5.51967	5.44186	4.45558	4.47408	4.51757
HOXC13	2.4471	1.29107	4.58498	3.29363	3.9393	18.8752	2.62331e-16	1.44825e-15	4.66889	4.56336	4.52268	3.36908	3.2644	3.2474
RP11-360F5.1	17.3364	4.11573	2.58804	-1.53135	0.528345	18.8713	2.63608e-16	1.45413e-15	2.64669	2.47659	2.64085	-1.33285	-1.15777	-2.10343
PMAIP1	2.29055	1.19569	5.2652	4.06999	4.66759	18.8557	2.68765e-16	1.48079e-15	5.22507	5.33796	5.23256	4.12569	3.92451	4.15978
N6AMT1	2.62127	1.39027	4.27632	2.88623	3.58127	18.8323	2.76714e-16	1.52103e-15	4.31736	4.31561	4.19598	2.92326	2.9297	2.80575
MAP10	2.25443	1.17276	4.68822	3.51556	4.10189	18.7566	3.0406e-16	1.65731e-15	4.71401	4.6942	4.65644	3.54383	3.47762	3.52523
CCDC81	5.44966	2.44617	3.06953	0.622545	1.84604	18.7497	3.06674e-16	1.67023e-15	3.13926	3.0311	3.03825	0.617563	0.851004	0.399067
DUSP7	2.08039	1.05685	5.64233	4.5864	5.11437	18.7181	3.19055e-16	1.73449e-15	5.70415	5.6887	5.53414	4.52982	4.59907	4.63031
SPATA5L1	2.36697	1.24304	4.67735	3.43459	4.05597	18.6688	3.39366e-16	1.83519e-15	4.62958	4.76993	4.63252	3.49524	3.41098	3.39755
YARS2	2.01603	1.01152	5.35297	4.3416	4.84728	18.6555	3.45048e-16	1.86226e-15	5.36981	5.33904	5.35006	4.32883	4.29766	4.39831
RPUSD2	2.57223	1.36302	4.21801	2.85551	3.53676	18.6475	3.48527e-16	1.87956e-15	4.25297	4.22022	4.18084	2.78637	2.93383	2.84632
PCDHB3	2.18936	1.13051	5.59274	4.4625	5.02762	18.6313	3.55708e-16	1.91303e-15	5.67987	5.60756	5.49079	4.54449	4.34654	4.49648
NUAK2	2.85859	1.5153	4.46324	2.94863	3.70594	18.6305	3.56067e-16	1.91346e-15	4.51855	4.57809	4.29309	3.04453	2.94616	2.85519
SNRK	2.389	1.25641	4.76829	3.5132	4.14074	18.6242	3.58871e-16	1.92777e-15	4.77751	4.8691	4.65827	3.46191	3.53589	3.5418
ZNF793	9.79183	3.29158	2.53068	-0.762231	0.884225	18.5893	3.74961e-16	2.00792e-15	2.40568	2.53816	2.64821	-0.611571	-0.96073	-0.714391
INE1	4.72369	2.23991	3.11386	0.874151	1.994	18.5786	3.80026e-16	2.03188e-15	3.06083	3.07849	3.20225	0.71508	0.968497	0.938877
RP3-467L1.6	9.92966	3.31174	2.73162	-0.579283	1.07617	18.5578	3.90121e-16	2.08181e-15	2.52733	2.87283	2.79469	-0.709418	-0.365572	-0.662861
LLPH	2.26883	1.18195	4.86405	3.68309	4.27357	18.532	4.03035e-16	2.14157e-15	4.83362	4.96468	4.79386	3.65122	3.69292	3.70515
DGCR11	5.9071	2.56245	2.84395	0.280125	1.56204	18.5082	4.15313e-16	2.20425e-15	2.94334	2.76753	2.82098	0.423476	0.226148	0.19075
TMOD3	2.00915	1.00659	6.61766	5.61055	6.1141	18.504	4.17493e-16	2.21326e-15	6.64691	6.56405	6.642	5.74107	5.46446	5.62611
LRP10	2.31432	1.21059	4.82805	3.61803	4.22304	18.4991	4.20108e-16	2.22627e-15	4.92057	4.82037	4.74321	3.56491	3.68558	3.6036
RP11-423P10.2	11.9102	3.57413	3.11509	-0.455576	1.32976	18.4981	4.20636e-16	2.2282e-15	3.17941	3.35142	2.81446	-0.476219	-0.325494	-0.565014
ANP32D	8.93448	3.15938	2.58198	-0.575761	1.00311	18.4947	4.22443e-16	2.23605e-15	2.43914	2.68827	2.61854	-0.760948	-0.492951	-0.473383
GCNT7	23.4407	4.55094	2.89472	-1.65421	0.620256	18.4871	4.26551e-16	2.25693e-15	3.03371	2.98762	2.66282	-1.89845	-0.96073	-2.10343
ZNF234	2.35607	1.23638	4.69739	3.45998	4.07869	18.4785	4.3121e-16	2.27807e-15	4.73773	4.65131	4.70313	3.57274	3.44033	3.36689
GPC3	2.23618	1.16104	5.08099	3.92029	4.50064	18.4662	4.37921e-16	2.30997e-15	5.19601	5.06221	4.98474	3.90993	3.95331	3.89764
OTUD3	2.02053	1.01474	5.32889	4.3135	4.82119	18.4023	4.74898e-16	2.48791e-15	5.33135	5.29067	5.36465	4.36684	4.31202	4.26164
ZNF319	2.34592	1.23015	4.66665	3.43592	4.05128	18.4022	4.74913e-16	2.48791e-15	4.73268	4.59991	4.66735	3.50618	3.35041	3.45116
ZNF567	2.39906	1.26247	5.05924	3.79638	4.42781	18.3948	4.79445e-16	2.51069e-15	5.0682	5.02102	5.08849	3.88919	3.60232	3.89764
LINC00984	3.49481	1.80522	3.92062	2.11461	3.01762	18.3845	4.85737e-16	2.53984e-15	3.9535	3.96958	3.83878	2.20253	2.30166	1.83964
FUT10	2.55272	1.35204	4.8431	3.49145	4.16728	18.3807	4.88106e-16	2.55021e-15	4.95133	4.82963	4.74835	3.57013	3.31915	3.58507
USF1	2.04511	1.03218	6.04508	5.01338	5.52923	18.373	4.92894e-16	2.57327e-15	6.11908	6.07232	5.94383	4.96201	5.12628	4.95185
PARM1	2.02513	1.01802	5.43976	4.42179	4.93078	18.3627	4.99366e-16	2.60212e-15	5.41884	5.50047	5.39996	4.49318	4.39682	4.37538
AKAP9	2.05685	1.04044	7.60644	6.56635	7.0864	18.3289	5.21284e-16	2.71016e-15	7.547	7.61327	7.65906	6.3674	6.67528	6.65638
ZDHHC17	2.00378	1.00273	6.78304	5.78025	6.28165	18.2998	5.41008e-16	2.80422e-15	6.7459	6.84741	6.75583	5.91482	5.62966	5.79628
ZDHHC20	2.68126	1.42291	6.21032	4.7874	5.49886	18.2993	5.41354e-16	2.80496e-15	6.19998	6.26899	6.162	4.98566	4.46981	4.90673
RP5-1112D6.8	8.05734	3.0103	2.89634	-0.111506	1.39242	18.2758	5.57822e-16	2.88376e-15	3.06083	2.96538	2.66282	-0.202458	0.0238401	-0.155901
PLEKHF1	2.90739	1.53973	3.82869	2.29035	3.05952	18.2566	5.71642e-16	2.95298e-15	3.85159	3.89212	3.74235	2.24233	2.27584	2.35287
IFIT5	2.12119	1.08487	5.96103	4.87613	5.41858	18.2482	5.77873e-16	2.98405e-15	5.98251	5.97481	5.92577	4.98956	4.69839	4.94044
RP11-338I21.1	10.1804	3.34772	2.46502	-0.884575	0.79022	18.2442	5.80819e-16	2.99701e-15	2.354	2.51538	2.52568	-0.709418	-0.733959	-1.21035
BBS10	2.36318	1.24073	5.31827	4.07722	4.69774	18.1797	6.30792e-16	3.23181e-15	5.31792	5.33036	5.30653	4.23166	3.86731	4.13269
ZNF416	2.46948	1.30421	4.21763	2.91342	3.56553	18.1505	6.5492e-16	3.34545e-15	4.23642	4.24582	4.17065	2.95155	2.93795	2.85076
MITF	2.97113	1.57101	3.78093	2.21009	2.99551	18.1253	6.76473e-16	3.4453e-15	3.8701	3.72348	3.74921	2.20924	2.13214	2.28888
SUV420H2	2.16433	1.11392	5.01891	3.90421	4.46156	18.1	6.98807e-16	3.54721e-15	5.05342	4.94351	5.0598	3.91405	3.97353	3.82505
DNAJC25	2.44022	1.28701	4.99466	3.70711	4.35089	18.0576	7.38005e-16	3.72828e-15	5.04122	4.93352	5.00925	3.82073	3.50288	3.79772
NR2F1-AS1	7.17136	2.84225	2.81837	-0.0238955	1.39724	18.0361	7.58785e-16	3.82482e-15	2.62505	2.8548	2.97526	-0.0993645	-0.105928	0.133606
CD200R1	14.9597	3.90301	2.09787	-1.80256	0.147653	18.0307	7.64172e-16	3.85056e-15	2.1058	2.20962	1.97819	-1.89845	-1.87146	-1.63777
SNRNP48	2.00903	1.0065	5.62126	4.61387	5.11757	18.0087	7.86122e-16	3.95546e-15	5.61822	5.55175	5.69382	4.69789	4.54605	4.59767
ELL	2.0451	1.03217	5.11432	4.08231	4.59832	17.9872	8.08341e-16	4.05973e-15	5.15129	5.10861	5.08307	4.10245	4.02093	4.12355
ZNF799	2.52603	1.33687	4.30629	2.97069	3.63849	17.9838	8.11925e-16	4.07448e-15	4.25767	4.42558	4.23561	2.93949	2.96648	3.00609
AC010642.1	11.2617	3.49335	2.80038	-0.688939	1.05572	17.9267	8.74216e-16	4.36346e-15	2.85314	2.95977	2.58824	-1.05045	-0.248532	-0.76783
LBX2-AS1	2.41996	1.27498	4.41085	3.13703	3.77394	17.9257	8.75345e-16	4.36751e-15	4.46068	4.4578	4.31407	3.06687	3.17642	3.16781
DOK1	2.34763	1.23121	5.11486	3.88421	4.49954	17.9155	8.87042e-16	4.4202e-15	5.19479	5.17673	4.97307	3.8996	3.98552	3.76752
HS3ST3A1	3.96833	1.98853	3.42973	1.44375	2.43674	17.9154	8.87192e-16	4.4202e-15	3.54088	3.48248	3.26583	1.33421	1.42132	1.57571
NOD1	2.01789	1.01285	5.44649	4.43309	4.93979	17.8615	9.51605e-16	4.71547e-15	5.51022	5.40765	5.4216	4.51906	4.42499	4.35522
EAF1	2.40039	1.26327	4.74299	3.48084	4.11191	17.8261	9.96547e-16	4.92397e-15	4.83362	4.79852	4.59683	3.49249	3.41098	3.53905
NOA1	2.05484	1.03903	5.35483	4.31635	4.83559	17.8127	1.01403e-15	5.00451e-15	5.45507	5.34659	5.26284	4.28186	4.33877	4.32841
RP11-275I14.4	19.1045	4.25584	2.3614	-1.88888	0.236262	17.7908	1.04351e-15	5.13388e-15	2.30947	2.5306	2.24414	-2.45485	-1.76043	-1.45136
PRTG	2.4436	1.28901	4.61511	3.32601	3.97056	17.76	1.08631e-15	5.32918e-15	4.604	4.66172	4.57961	3.46472	3.15887	3.35444
NSUN3	2.49818	1.32088	4.10351	2.78296	3.44324	17.7464	1.10589e-15	5.4175e-15	4.06217	4.17006	4.07831	2.82183	2.73971	2.78734
HBEGF	2.16895	1.117	6.92519	5.80898	6.36709	17.7454	1.10729e-15	5.42241e-15	6.96736	7.09475	6.71347	5.83788	5.81364	5.77542
ZBTB9	2.4966	1.31997	4.65465	3.33523	3.99494	17.7169	1.14949e-15	5.61106e-15	4.69509	4.76028	4.50859	3.44211	3.31282	3.25076
LINC00936	2.24367	1.16586	4.4636	3.29756	3.88058	17.7138	1.1541e-15	5.63157e-15	4.46271	4.42558	4.50251	3.26344	3.31282	3.31643
FUT11	2.12827	1.08968	5.18478	4.09511	4.63994	17.6724	1.21857e-15	5.91783e-15	5.13224	5.24062	5.18147	4.18476	3.97152	4.12904
THAP7	2.04724	1.03368	5.68065	4.64778	5.16421	17.6723	1.2188e-15	5.91783e-15	5.78606	5.67677	5.57912	4.5577	4.69961	4.68602
AC068580.6	9.05073	3.17803	2.50477	-0.675231	0.914768	17.6673	1.22681e-15	5.94834e-15	2.354	2.46871	2.6916	-0.709418	-0.492951	-0.823326
DBP	2.51339	1.32964	4.33662	3.00766	3.67214	17.666	1.22895e-15	5.95664e-15	4.46271	4.32873	4.21841	3.00266	2.99841	3.02192
TIGD1	2.28828	1.19426	4.45792	3.26356	3.86074	17.6601	1.23841e-15	5.99823e-15	4.43603	4.45979	4.47794	3.22422	3.35659	3.20988
PER2	2.93437	1.55305	4.05906	2.50542	3.28224	17.6263	1.29486e-15	6.25623e-15	4.22447	3.92993	4.02276	2.47728	2.60103	2.43794
CERS6	2.23568	1.16071	6.08655	4.92595	5.50625	17.6092	1.32422e-15	6.38906e-15	6.05241	6.16305	6.04419	5.07378	4.70445	4.9996
MNT	2.12313	1.08619	5.13189	4.0453	4.58859	17.6019	1.3371e-15	6.44443e-15	5.11553	5.06483	5.21532	3.96251	4.13484	4.03855
PCDHB4	3.28549	1.71611	3.86213	2.14457	3.00335	17.5933	1.35242e-15	6.50687e-15	3.98499	3.77554	3.82586	2.35554	1.94821	2.12996
PROCR	2.01272	1.00915	5.93425	4.92587	5.43006	17.5817	1.37321e-15	6.59998e-15	6.00503	5.91732	5.8804	4.82892	4.88075	5.06792
REL	3.01784	1.59352	3.8927	2.29918	3.09594	17.5569	1.41898e-15	6.80567e-15	3.9448	3.92706	3.80625	2.46051	2.10307	2.33397
AC137932.5	7.47103	2.90131	2.32486	-0.577585	0.873638	17.4834	1.56385e-15	7.45366e-15	2.36274	2.30125	2.31059	-0.433784	-0.584581	-0.714391
MRPL50	2.24479	1.16658	4.94036	3.77408	4.35722	17.4679	1.59636e-15	7.59542e-15	5.05477	4.94777	4.81854	3.84463	3.7195	3.7581
UBASH3B	2.6935	1.42948	4.02727	2.59731	3.31229	17.4567	1.62027e-15	7.69584e-15	4.07819	3.96958	4.03404	2.67928	2.43597	2.67668
ZNF697	2.05458	1.03885	5.27466	4.23579	4.75523	17.4176	1.70673e-15	8.08139e-15	5.3089	5.28619	5.22888	4.32883	4.11858	4.25997
EID2B	3.29636	1.72087	3.37931	1.65971	2.51951	17.4066	1.73187e-15	8.1976e-15	3.44532	3.39367	3.29895	1.57143	1.70868	1.69901
ZBTB45	2.33245	1.22185	4.81725	3.59533	4.20629	17.3496	1.86853e-15	8.78998e-15	4.96862	4.69758	4.78554	3.55441	3.5814	3.65018
CYP51A1	3.09484	1.62987	3.64955	2.01939	2.83447	17.3362	1.9024e-15	8.94011e-15	3.69769	3.70347	3.54749	2.1616	2.00432	1.89227
TJAP1	2.18484	1.12753	4.90558	3.77828	4.34193	17.3338	1.90856e-15	8.95985e-15	4.97718	4.88399	4.85557	3.7139	3.90359	3.71735
RP3-428L16.2	3.44498	1.7845	3.47133	1.68744	2.57939	17.305	1.98341e-15	9.27957e-15	3.61227	3.43875	3.36298	1.72916	1.56683	1.76634
DGCR14	2.07616	1.05392	5.42222	4.36945	4.89583	17.2701	2.07831e-15	9.70041e-15	5.43862	5.4859	5.34214	4.23987	4.46411	4.40436
NAF1	2.24416	1.16618	4.56478	3.39884	3.98181	17.2499	2.13527e-15	9.94266e-15	4.59846	4.52206	4.57382	3.36608	3.31915	3.51128
DLK1	4.27813	2.09698	3.52086	1.42393	2.4724	17.2391	2.16646e-15	1.00708e-14	3.73183	3.39367	3.43709	1.49661	1.17817	1.59701
ZFP1	2.11628	1.08153	4.93746	3.85662	4.39704	17.2039	2.27121e-15	1.05229e-14	4.92796	5.03043	4.85398	3.90167	3.7987	3.86948
ALKBH1	2.00296	1.00214	4.99364	3.99164	4.49264	17.1459	2.45586e-15	1.1309e-14	5.05612	4.95907	4.96572	3.96251	4.00137	4.01105
AC010095.5	17.9697	4.1675	2.12284	-2.0398	0.0415185	17.1258	2.5232e-15	1.15841e-14	2.23523	2.19057	1.94271	-2.45485	-2.123	-1.54155
DIO2	2.18127	1.12517	5.18091	4.05506	4.61798	17.1149	2.56067e-15	1.17326e-14	5.23582	5.15233	5.15459	4.22007	3.91827	4.02683
PEX13	2.034	1.02432	5.93766	4.91345	5.42555	17.1145	2.56225e-15	1.1736e-14	5.9202	6.01393	5.87883	5.04687	4.76139	4.93209
RP11-228B15.4	5.09428	2.34888	2.98208	0.63228	1.80718	17.0983	2.61863e-15	1.19623e-14	2.84692	3.08366	3.01566	0.696097	0.851004	0.349739
C14orf169	2.07076	1.05016	5.20602	4.15598	4.681	17.0925	2.63939e-15	1.20491e-14	5.3168	5.13126	5.17001	4.08614	4.22024	4.16157
S1PR3	2.18741	1.12922	4.42296	3.29436	3.85866	17.0595	2.7599e-15	1.25202e-14	4.43188	4.46177	4.37523	3.27627	3.28396	3.32283
AC004837.5	9.7423	3.28426	2.49278	-0.789665	0.85156	17.0316	2.86631e-15	1.29347e-14	2.64669	2.48443	2.34723	-0.709418	-1.22992	-0.429662
PDP2	2.60023	1.37864	4.15881	2.78005	3.46943	16.9833	3.0605e-15	1.37612e-14	4.07819	4.26643	4.1318	2.92326	2.66708	2.7498
LCMT2	2.46164	1.29962	4.12066	2.82189	3.47128	16.954	3.18512e-15	1.42423e-14	4.17569	4.17491	4.01139	2.85644	2.75848	2.85076
CCDC94	2.18881	1.13015	5.18855	4.05778	4.62316	16.9498	3.20319e-15	1.43185e-14	5.32689	5.06874	5.17001	4.05108	4.14735	3.97491
FOXL2	2.49342	1.31813	4.23856	2.91976	3.57916	16.9481	3.21047e-15	1.43464e-14	4.36165	4.13562	4.21841	2.91507	3.00235	2.84187
PLAUR	2.28958	1.19508	4.35623	3.16144	3.75884	16.9456	3.22149e-15	1.43816e-14	4.40251	4.35677	4.30943	3.20084	3.05643	3.22706
PCDH10	3.33078	1.73586	3.29078	1.55605	2.42342	16.9398	3.24692e-15	1.44763e-14	3.32521	3.35997	3.18717	1.59212	1.47903	1.59701
AF129075.5	11.582	3.53381	1.89725	-1.63811	0.129573	16.9113	3.37581e-15	1.5012e-14	1.95206	1.8457	1.89401	-1.41302	-1.76043	-1.74086
RP11-159G9.5	4.61372	2.20593	3.77844	1.57414	2.67629	16.9018	3.4197e-15	1.51924e-14	3.82019	3.94422	3.57092	1.81084	1.16416	1.74742
IFFO2	2.03665	1.0262	4.88661	3.8606	4.37361	16.8922	3.46484e-15	1.53681e-14	4.91464	4.91042	4.83476	3.8575	3.92659	3.79772
MFSD9	2.08891	1.06275	4.61888	3.55567	4.08728	16.8915	3.46833e-15	1.53786e-14	4.61136	4.60351	4.64177	3.57793	3.5919	3.49719
TNRC6C	2.1035	1.07279	4.68254	3.60896	4.14575	16.8845	3.5016e-15	1.5515e-14	4.70544	4.64258	4.69959	3.68049	3.61009	3.53629
RP11-497E19.1	6.41114	2.68058	2.63438	-0.0442497	1.29507	16.8528	3.65637e-15	1.61602e-14	2.77013	2.71518	2.41784	0.0275476	-0.140279	-0.0200175
DUSP8	2.2654	1.17977	4.50894	3.32852	3.91873	16.8341	3.75152e-15	1.65488e-14	4.57983	4.4815	4.46549	3.41334	3.3658	3.20642
UAP1L1	2.11736	1.08227	5.24072	4.15877	4.69975	16.8285	3.78021e-15	1.66701e-14	5.32912	5.26586	5.12719	4.16419	4.26194	4.05018
ALKBH3	2.04785	1.03411	4.97688	3.94288	4.45988	16.8133	3.85997e-15	1.69899e-14	5.00398	4.97724	4.94943	3.8996	4.05738	3.87166
GRPR	3.77857	1.91784	3.30393	1.38572	2.34483	16.8113	3.8702e-15	1.70286e-14	3.31173	3.39782	3.20225	1.63262	1.21939	1.30515
TMEM186	2.42312	1.27687	4.17343	2.89754	3.53548	16.779	4.04577e-15	1.77274e-14	4.21726	4.25502	4.04802	2.91507	2.90042	2.87711
DCUN1D3	2.25501	1.17313	4.38628	3.21318	3.79973	16.7754	4.06604e-15	1.77957e-14	4.33746	4.46177	4.35962	3.26021	3.25121	3.12813
TUSC1	2.33054	1.22067	4.47438	3.25448	3.86443	16.7372	4.28516e-15	1.86987e-14	4.53605	4.54098	4.3461	3.32343	3.16592	3.27409
NOL12	2.02754	1.01973	5.17291	4.1541	4.6635	16.7367	4.28785e-15	1.87046e-14	5.22986	5.22081	5.06805	4.08978	4.22531	4.1472
ENTPD7	2.51201	1.32884	4.61893	3.28924	3.95409	16.7225	4.37291e-15	1.90333e-14	4.59661	4.64258	4.6176	3.50618	3.06776	3.29378
CSRNP1	2.307	1.20602	4.72261	3.51797	4.12029	16.711	4.44281e-15	1.93009e-14	4.8194	4.7843	4.56412	3.44496	3.58928	3.51966
PSMA6	2.64984	1.40591	4.11971	2.7144	3.41705	16.7022	4.4968e-15	1.95169e-14	4.28322	4.10797	3.96793	2.75001	2.68681	2.70637
ZNF584	2.57366	1.36382	4.33664	2.97373	3.65518	16.6888	4.58066e-15	1.98683e-14	4.3038	4.49514	4.21097	3.00266	3.06776	2.85076
RPL23A	2.17291	1.11963	5.32724	4.20904	4.76814	16.6874	4.58927e-15	1.98994e-14	5.38919	5.44831	5.14421	4.21007	4.17555	4.2415
GEM	2.14933	1.10388	4.61757	3.51328	4.06542	16.6308	4.96247e-15	2.1376e-14	4.67065	4.58904	4.59302	3.60871	3.41985	3.51128
MYLK2	4.37929	2.1307	2.9473	0.815913	1.88161	16.5946	5.21779e-15	2.23566e-14	3.02823	2.78668	3.027	0.733816	0.742069	0.971855
RP4-724E16.2	8.20278	3.03611	2.1748	-0.858733	0.658032	16.5606	5.4699e-15	2.33785e-14	2.25415	2.19057	2.07967	-1.05045	-0.96073	-0.565014
AC027601.1	7.12673	2.83324	2.14386	-0.688939	0.727458	16.5296	5.71025e-15	2.43527e-14	2.1058	2.16153	2.16425	-0.814388	-0.538039	-0.714391
HOXA-AS3	3.73973	1.90293	3.11205	1.20812	2.16008	16.5204	5.78417e-15	2.46298e-14	3.20394	3.09395	3.03825	1.40606	1.09201	1.1263
C7orf43	2.05894	1.04191	5.05124	4.01015	4.53069	16.5031	5.9253e-15	2.51995e-14	5.0815	5.13624	4.93596	3.99588	4.07807	3.95649
FANCF	2.23853	1.16255	4.40552	3.24363	3.82458	16.5008	5.94373e-15	2.527e-14	4.49687	4.37586	4.34384	3.15986	3.29365	3.27739
CNNM2	2.20611	1.1415	4.37687	3.23646	3.80666	16.4863	6.06505e-15	2.5746e-14	4.37035	4.4578	4.30245	3.19071	3.25121	3.26746
AC005042.4	9.37977	3.22955	2.0519	-1.17891	0.436498	16.483	6.093e-15	2.58487e-14	1.95206	2.08108	2.12258	-0.927598	-1.47092	-1.1382
ZNF581	2.06364	1.04519	5.17421	4.12861	4.65141	16.4729	6.17946e-15	2.6167e-14	5.29412	5.07005	5.15846	4.09884	4.21005	4.07695
ZBTB37	2.1057	1.0743	4.94877	3.87369	4.41123	16.4663	6.23714e-15	2.64031e-14	4.89367	4.95343	4.99921	4.00748	3.75731	3.85629
ARMC5	2.14228	1.09915	4.5806	3.48261	4.0316	16.3316	7.53075e-15	3.14529e-14	4.6205	4.64957	4.47173	3.43926	3.5001	3.50847
CTA-445C9.14	3.47522	1.79711	3.43502	1.6389	2.53696	16.2931	7.95028e-15	3.30845e-14	3.50578	3.56243	3.23683	1.7751	1.59842	1.54317
EPHA1	6.50338	2.70119	2.98753	0.289729	1.63863	16.2868	8.0206e-15	3.33266e-14	2.98923	3.26757	2.70578	0.303182	0.403545	0.162461
ZGPAT	2.27944	1.18868	4.38121	3.1919	3.78655	16.2782	8.11913e-15	3.36625e-14	4.40038	4.3482	4.39505	3.18391	3.33487	3.05692
CELF2-AS1	9.83721	3.29825	2.25728	-1.04335	0.606965	16.264	8.28266e-15	3.43014e-14	2.32744	2.19057	2.25382	-0.565028	-1.56112	-1.0039
TEF	2.1008	1.07094	4.56083	3.48969	4.02526	16.2515	8.4297e-15	3.48683e-14	4.62777	4.52206	4.53265	3.47867	3.56283	3.42758
ZNF350	5.46784	2.45097	2.58273	0.130103	1.35642	16.2384	8.58719e-15	3.54344e-14	2.50381	2.62584	2.61854	0.252108	0.330171	-0.19197
ZNF829	2.24499	1.16671	4.43745	3.27179	3.85462	16.2075	8.97032e-15	3.68494e-14	4.45456	4.5391	4.31869	3.311	3.20407	3.30029
AC144831.1	2.54898	1.34992	4.19387	2.84446	3.51916	16.2072	8.97417e-15	3.68542e-14	4.29469	4.26416	4.02276	2.95155	2.81784	2.76399
INTS2	2.08275	1.05849	5.98488	4.92493	5.4549	16.1978	9.09426e-15	3.72694e-14	5.99029	5.87619	6.08815	5.10919	4.78903	4.87657
ZNF570	2.70763	1.43703	3.51587	2.07957	2.79772	16.1654	9.5209e-15	3.8821e-14	3.49389	3.56243	3.4913	2.0834	1.99643	2.15889
RP1-92O14.6	6.49998	2.70044	2.42489	-0.273762	1.07556	16.1639	9.5414e-15	3.88859e-14	2.47183	2.49223	2.31059	-0.476219	0.0845941	-0.429662
NCBP2-AS2	2.26874	1.18189	4.62905	3.44836	4.0387	16.1139	1.02429e-14	4.14084e-14	4.75111	4.67891	4.45713	3.43067	3.4691	3.4453
RP11-669E14.6	9.34977	3.22493	1.82665	-1.39908	0.213786	16.0853	1.06682e-14	4.30646e-14	1.85624	1.8457	1.77801	-1.18476	-1.47092	-1.54155
ZNF823	2.24583	1.16725	4.33316	3.16576	3.74946	16.0795	1.07555e-14	4.34043e-14	4.32633	4.30236	4.37078	3.07791	3.30964	3.10973
RP3-405J10.3	5.50598	2.461	2.41171	-0.0472965	1.1822	16.0088	1.18966e-14	4.77706e-14	2.51953	2.39575	2.31984	-0.238527	-0.00752407	0.104162
ANKRD42	2.4845	1.31295	4.01985	2.70616	3.36301	15.987	1.22741e-14	4.9148e-14	4.11488	3.9945	3.95017	2.8607	2.61654	2.64124
PCDHB14	2.30026	1.20179	4.32025	3.11906	3.71966	15.9822	1.23575e-14	4.94624e-14	4.46068	4.25959	4.24049	3.04828	3.14824	3.16067
CDK11A	7.69879	2.94463	2.09492	-0.849101	0.622911	15.9195	1.35189e-14	5.37198e-14	2.03097	2.14183	2.11197	-1.05045	-0.492951	-1.0039
RP11-348P10.2	4.09857	2.03512	2.88679	0.853624	1.87021	15.9146	1.36152e-14	5.40868e-14	2.90195	3.00408	2.75433	0.752313	1.04692	0.761637
CXorf24	3.85932	1.94835	2.74603	0.798355	1.77219	15.8515	1.49065e-14	5.89439e-14	2.77669	2.74159	2.71982	0.788609	0.684354	0.922102
PLAG1	2.1313	1.09174	4.53177	3.43888	3.98532	15.8504	1.49303e-14	5.90212e-14	4.58544	4.44379	4.56607	3.54117	3.36885	3.40662
AP001189.4	7.38856	2.88529	2.01848	-0.865346	0.576568	15.8375	1.52115e-14	6.00637e-14	2.08481	2.10161	1.86902	-0.814388	-0.900609	-0.881041
POSTN	2.33667	1.22446	3.93283	2.70795	3.32039	15.8122	1.57765e-14	6.20806e-14	3.9331	3.86835	3.99705	2.69371	2.6521	2.77804
DLX2	2.52045	1.33368	3.99586	2.66432	3.33009	15.8107	1.58108e-14	6.21796e-14	3.99627	4.09266	3.89864	2.49935	2.76777	2.72584
RP11-449P15.2	2.33955	1.22623	3.87968	2.65265	3.26617	15.7737	1.66793e-14	6.52963e-14	3.83283	3.84418	3.96204	2.66958	2.64203	2.64636
SIM1	2.01902	1.01366	5.25624	4.24133	4.74878	15.7552	1.71311e-14	6.69316e-14	5.20698	5.19596	5.36577	4.36833	4.12944	4.2262
TFPI2	2.32908	1.21976	4.02272	2.80303	3.41287	15.7542	1.71557e-14	6.70088e-14	4.06486	4.03243	3.97087	2.89023	2.67697	2.84187
TBX2	2.52283	1.33504	3.69487	2.35918	3.02702	15.7365	1.7601e-14	6.8631e-14	3.78159	3.59901	3.70401	2.34339	2.40652	2.32762
RUNDC1	2.12629	1.08834	4.28788	3.19925	3.74357	15.6992	1.85778e-14	7.20513e-14	4.27166	4.3178	4.27418	3.25048	3.24124	3.10602
RP1L1	5.43643	2.44266	2.31969	-0.121237	1.09923	15.6669	1.94719e-14	7.52851e-14	2.3972	2.38741	2.17448	-0.0993645	-0.211538	-0.0528074
AQPEP	9.52021	3.25099	2.07828	-1.17604	0.451117	15.6598	1.96724e-14	7.59748e-14	1.97505	1.93995	2.31984	-0.987719	-1.47092	-1.06949
PUSL1	2.64459	1.40304	3.72108	2.31924	3.02016	15.6322	2.04806e-14	7.89407e-14	3.85779	3.70011	3.60536	2.22256	2.38856	2.3466
SRSF10	2.43496	1.2839	3.7681	2.4837	3.1259	15.5985	2.15112e-14	8.26463e-14	3.79457	3.73339	3.77633	2.5636	2.35813	2.52939
RP11-686D22.8	2.38754	1.25552	3.88521	2.62943	3.25732	15.5862	2.18997e-14	8.40334e-14	3.9448	3.898	3.81282	2.69371	2.6819	2.51268
DDX28	2.37774	1.24959	4.3612	3.11288	3.73704	15.5766	2.22111e-14	8.51498e-14	4.48691	4.41331	4.18337	3.06317	3.2109	3.06458
TBCC	2.16135	1.11193	4.5295	3.41796	3.97373	15.5443	2.32851e-14	8.89627e-14	4.60768	4.58358	4.39724	3.48145	3.44323	3.32921
PCDHB11	2.44457	1.28958	4.53007	3.23978	3.88492	15.4965	2.49729e-14	9.50563e-14	4.60952	4.50481	4.47587	3.45346	2.99841	3.26746
CCDC142	2.06584	1.04673	4.45431	3.40684	3.93057	15.4808	2.55539e-14	9.69454e-14	4.50282	4.38217	4.47794	3.41334	3.47479	3.33239
ZNF461	2.19042	1.13121	4.08696	2.95577	3.52137	15.4025	2.86756e-14	1.07983e-13	3.99346	4.13562	4.1318	2.95953	2.94206	2.96573
LENG1	2.16042	1.11131	4.3308	3.22014	3.77547	15.3775	2.97536e-14	1.11767e-13	4.41727	4.37164	4.2035	3.25373	3.2177	3.189
RP1-102K2.8	4.42809	2.14668	2.55762	0.411878	1.48475	15.3619	3.04488e-14	1.14254e-13	2.43914	2.66086	2.57285	0.303182	0.582713	0.349739
STEAP3-AS1	10.4402	3.38407	2.04475	-1.33822	0.353263	15.3394	3.1476e-14	1.17947e-13	2.25415	1.83347	2.04663	-1.78742	-1.15777	-1.06949
RPS26	2.52135	1.3342	4.34366	3.01149	3.67757	15.3335	3.1751e-14	1.18945e-13	4.19785	4.57809	4.25503	2.9635	3.0102	3.06076
GJC2	5.67909	2.50566	2.43965	-0.0649367	1.18735	15.3201	3.2388e-14	1.21166e-13	2.68205	2.34497	2.29192	-0.167269	-0.00752407	-0.0200175
ZNF222	2.7887	1.47959	3.28366	1.80429	2.54398	15.3102	3.2865e-14	1.22817e-13	3.2705	3.24004	3.34043	1.69131	1.84663	1.87494
RP11-849H4.4	12.0944	3.59626	2.27358	-1.32102	0.476279	15.2854	3.40986e-14	1.27047e-13	2.25415	2.22842	2.33816	-2.01875	-0.492951	-1.45136
TAF3	2.12618	1.08827	4.86068	3.77289	4.31678	15.2227	3.74277e-14	1.38474e-13	4.8678	4.98831	4.72592	3.89544	3.7503	3.67292
ZSWIM3	2.25339	1.1721	3.98114	2.80857	3.39486	15.219	3.76364e-14	1.39209e-13	4.00747	3.99175	3.94421	2.8692	2.87485	2.68167
C2orf15	11.6168	3.53814	1.80643	-1.73224	0.0370946	15.1936	3.90835e-14	1.44174e-13	1.90494	1.60801	1.90634	-2.14999	-1.30587	-1.74086
IRF9	3.87293	1.95343	2.6496	0.694539	1.67207	15.1741	4.02419e-14	1.4797e-13	2.60308	2.63291	2.71282	0.770575	0.797564	0.515476
RP11-154D6.1	7.17302	2.84258	1.78912	-1.0538	0.367656	15.1481	4.18362e-14	1.53258e-13	1.80583	1.7835	1.77801	-0.927598	-1.22992	-1.0039
RP6-99M1.2	2.49264	1.31768	3.83889	2.51992	3.17941	15.1326	4.28133e-14	1.56462e-13	3.70114	3.87134	3.94421	2.64504	2.44758	2.46715
MARS2	2.38245	1.25245	4.386	3.13375	3.75988	15.0741	4.67327e-14	1.69434e-13	4.4381	4.49902	4.22088	3.29532	3.11586	2.99008
ZSCAN22	2.15911	1.11044	4.00544	2.89482	3.45013	14.9787	5.39454e-14	1.93592e-13	4.0541	3.99724	3.96499	2.96747	2.8312	2.88579
WDR83OS	2.07375	1.05224	5.13379	4.08328	4.60854	14.9716	5.45247e-14	1.95365e-13	5.14497	5.26586	4.99055	3.95853	4.20493	4.08639
AC007879.7	6.33269	2.66282	1.95929	-0.703308	0.62799	14.9361	5.75302e-14	2.05224e-13	2.11618	1.90532	1.85637	-0.709418	-0.632676	-0.76783
MAGEA2	4.858	2.28036	2.48465	0.206695	1.34567	14.9341	5.77044e-14	2.05792e-13	2.41412	2.67463	2.36521	0.277871	-0.00752407	0.349739
TSSK6	2.55285	1.35211	3.40125	2.04955	2.7254	14.9214	5.88264e-14	2.09576e-13	3.4412	3.36422	3.39833	2.00844	1.98851	2.15171
DOLK	2.03663	1.02618	4.84634	3.82092	4.33363	14.91	5.98483e-14	2.13051e-13	4.99417	4.80166	4.74321	3.73265	3.87162	3.8585
CTD-2236F14.1	18.0919	4.17728	2.22758	-1.95348	0.137051	14.8985	6.08985e-14	2.16621e-13	1.8808	2.43673	2.36521	-1.18476	-2.26739	-2.40829
ZNF543	2.31267	1.20956	4.02986	2.82113	3.4255	14.883	6.23423e-14	2.21355e-13	3.9331	4.17975	3.97673	2.88605	2.74442	2.83292
HOXB-AS2	6.8667	2.77962	2.00157	-0.780189	0.610689	14.8497	6.55786e-14	2.32306e-13	2.00886	1.90532	2.09052	-0.51994	-1.15777	-0.662861
ZFP69B	2.42283	1.27669	3.68091	2.40463	3.04277	14.8225	6.83456e-14	2.41051e-13	3.74192	3.70682	3.59397	2.48836	2.27584	2.44969
HOXA3	2.08745	1.06174	4.42884	3.36627	3.89755	14.8099	6.9664e-14	2.45324e-13	4.48691	4.28899	4.51061	3.31723	3.38706	3.39451
LINC00693	3.33834	1.73913	2.87159	1.13119	2.00139	14.795	7.12718e-14	2.50385e-13	3.00048	2.76109	2.85319	1.1924	1.15002	1.05114
TAF7L	9.06339	3.18005	1.79055	-1.39008	0.200236	14.7796	7.29608e-14	2.55819e-13	1.52344	1.89359	1.95463	-1.41302	-1.30587	-1.45136
NPTX1	3.39688	1.76421	3.07822	1.31465	2.19643	14.7227	7.95757e-14	2.77314e-13	3.26118	3.00408	2.9694	1.1924	1.51259	1.23896
MSX1	2.00094	1.00068	4.33905	3.33939	3.83922	14.7154	8.04749e-14	2.80234e-13	4.33079	4.40507	4.2813	3.27627	3.3719	3.36998
RP11-20I23.8	4.72757	2.2411	2.27181	0.0305943	1.1512	14.7146	8.05796e-14	2.80528e-13	2.24472	2.33633	2.23439	0.0576049	0.226148	-0.19197
RP11-440L14.1	3.63233	1.86089	2.598	0.736628	1.66732	14.7141	8.06357e-14	2.80652e-13	2.52733	2.62584	2.64085	0.824014	0.624233	0.761637
AC025171.1	4.29625	2.10308	2.44104	0.339257	1.39015	14.7013	8.22347e-14	2.85855e-13	2.55047	2.45281	2.31984	0.376555	0.171182	0.470033
CTD-2310F14.1	5.77295	2.52931	2.03361	-0.495295	0.769158	14.6798	8.4979e-14	2.94873e-13	1.97505	2.10161	2.02417	-0.352483	-0.787398	-0.346004
IQGAP2	3.59208	1.84482	3.17856	1.33069	2.25463	14.6521	8.86769e-14	3.06929e-13	3.36926	2.91985	3.24657	1.42924	1.32389	1.23896
RP11-46C24.7	3.73119	1.89963	2.66399	0.765999	1.71499	14.6419	9.00673e-14	3.1135e-13	2.60308	2.793	2.59587	0.80642	0.603622	0.887953
SLC35G2	2.16431	1.11391	3.9158	2.80152	3.35866	14.6233	9.26888e-14	3.19929e-13	3.86704	3.88621	3.99416	2.75001	2.84882	2.80575
RP4-756G23.5	4.91564	2.29738	2.59569	0.298632	1.44716	14.6044	9.54247e-14	3.28054e-13	2.79618	2.38741	2.60347	0.115904	0.198927	0.581065
COX16	2.03738	1.02672	4.39632	3.37075	3.88354	14.5984	9.62977e-14	3.30889e-13	4.38973	4.47364	4.32559	3.27627	3.4691	3.36689
C15orf61	3.25689	1.7035	2.96576	1.26475	2.11526	14.5721	1.00288e-13	3.43743e-13	3.07686	3.02573	2.79469	1.17879	1.25947	1.356
IER5L	2.39452	1.25973	3.45413	2.19476	2.82445	14.5711	1.00434e-13	3.44156e-13	3.43707	3.45879	3.46653	2.12658	2.24955	2.20815
RP11-332H14.2	2.3422	1.22787	3.91224	2.6841	3.29817	14.5588	1.02358e-13	3.50311e-13	3.9679	3.95272	3.81609	2.77284	2.77239	2.50706
ZNF709	2.43039	1.28119	3.55159	2.27033	2.91096	14.5273	1.07461e-13	3.67043e-13	3.48991	3.6452	3.51967	2.36759	2.25617	2.18724
CDYL2	3.17321	1.66594	2.82365	1.15686	1.99025	14.5129	1.09892e-13	3.75069e-13	2.87775	2.81182	2.78136	1.25859	1.19204	1.01995
C19orf44	2.47308	1.30631	3.60311	2.29683	2.94997	14.5023	1.11701e-13	3.80393e-13	3.6449	3.61695	3.54749	2.26826	2.47052	2.15171
RP11-867G23.3	7.20129	2.84826	1.65237	-1.1947	0.228833	14.4549	1.20212e-13	4.07456e-13	1.69941	1.65044	1.60725	-1.41302	-0.96073	-1.21035
GLCCI1	2.97417	1.57249	3.5666	1.99161	2.7791	14.4084	1.29228e-13	4.36081e-13	3.65561	3.39782	3.64637	2.20924	1.7183	2.04728
ANKRD61	3.72491	1.89721	2.68119	0.781178	1.73118	14.3621	1.38895e-13	4.66412e-13	2.73689	2.49223	2.81446	0.824014	0.815598	0.703921
ZNF132	3.34952	1.74396	2.66569	0.9204	1.79305	14.3472	1.4216e-13	4.76561e-13	2.73015	2.57534	2.6916	0.957538	0.968497	0.835166
AC009404.2	3.9985	1.99946	2.62546	0.62354	1.6245	14.3387	1.44062e-13	4.82465e-13	2.66094	2.60441	2.61102	0.973392	0.450466	0.446764
AC010976.2	4.56822	2.19163	2.35981	0.168268	1.26404	14.3365	1.44561e-13	4.84018e-13	2.43085	2.29234	2.35625	-0.0345133	0.495909	0.0434079
MEOX2	2.00845	1.00608	4.30304	3.29675	3.79989	14.3313	1.45735e-13	4.8771e-13	4.39826	4.23192	4.27893	3.32033	3.2312	3.33872
SGMS2	2.00949	1.00683	5.28975	4.28255	4.78615	14.3211	1.48066e-13	4.94908e-13	5.25591	5.33145	5.28189	4.46682	4.06682	4.31402
P4HA3	2.05937	1.0422	4.08839	3.04584	3.56711	14.3174	1.48944e-13	4.97724e-13	4.04869	4.04839	4.16809	2.98321	3.10123	3.05307
ZNF443	2.15605	1.10839	4.14283	3.03603	3.58943	14.3118	1.50249e-13	5.01232e-13	4.11229	4.27097	4.04524	3.02565	2.95432	3.12813
KLLN	5.45572	2.44777	1.90839	-0.540998	0.683694	14.2923	1.54888e-13	5.16081e-13	1.86857	1.82114	2.03545	-0.51994	-0.584581	-0.518471
PCDHA3	2.24052	1.16383	3.89657	2.73209	3.31433	14.2786	1.58262e-13	5.26939e-13	3.90045	3.91551	3.87374	2.8944	2.59059	2.71126
NHLH2	6.58627	2.71946	2.33694	-0.377936	0.979504	14.2232	1.72647e-13	5.71236e-13	2.5657	2.38741	2.05773	-0.760948	-0.105928	-0.266932
TATDN2	2.09049	1.06384	4.20356	3.139	3.67128	14.2226	1.72785e-13	5.71472e-13	4.20029	4.15294	4.25744	3.09613	3.2872	3.03368
GPR135	2.51247	1.32911	3.39463	2.06447	2.72955	14.2193	1.73694e-13	5.74147e-13	3.3072	3.41434	3.46236	2.10515	2.15357	1.9347
RP11-498D10.5	7.22949	2.85389	1.87249	-0.982724	0.444884	14.1851	1.83299e-13	6.02852e-13	1.77996	2.0068	1.83072	-0.709418	-0.787398	-1.45136
ILK	5.76348	2.52694	2.24354	-0.281388	0.981074	14.1808	1.84557e-13	6.06553e-13	2.14687	2.30125	2.28249	-0.709418	0.171182	-0.305926
ZNF695	2.86057	1.5163	3.17296	1.65447	2.41372	14.1681	1.88275e-13	6.17444e-13	3.21364	3.0733	3.23194	1.84571	1.47903	1.63868
ZBTB3	3.25539	1.70283	2.99119	1.28842	2.1398	14.1514	1.93289e-13	6.32678e-13	3.00607	3.1143	2.85319	1.44069	1.37342	1.05114
RP11-875O11.1	7.83365	2.96969	1.53205	-1.43831	0.0468711	14.1245	2.01705e-13	6.57876e-13	1.56948	1.57901	1.44767	-1.11604	-1.65734	-1.54155
MBNL1-AS1	4.09626	2.03431	2.47285	0.436475	1.45466	14.0869	2.14063e-13	6.94883e-13	2.57325	2.32764	2.51766	0.617563	0.198927	0.492934
COQ6	2.39733	1.26143	3.64877	2.38654	3.01765	14.0728	2.189e-13	7.09746e-13	3.68728	3.55501	3.70401	2.30004	2.56417	2.29541
ARC	2.57628	1.36529	4.53138	3.169	3.85019	14.0498	2.27027e-13	7.34499e-13	4.644	4.73421	4.21593	3.11412	3.2109	3.18197
RP5-1142A6.2	4.93238	2.30229	2.27357	-0.0324179	1.12058	14.0423	2.29752e-13	7.4283e-13	2.28207	2.20962	2.32903	0.277871	0.0545369	-0.429662
ZNF224	3.39726	1.76437	2.52003	0.754833	1.63743	14.0386	2.31102e-13	7.46666e-13	2.50381	2.5306	2.52568	0.841396	0.779302	0.6438
ZBTB22	2.04444	1.03171	4.25587	3.223	3.73944	14.0215	2.37458e-13	7.6576e-13	4.33302	4.16519	4.26942	3.27627	3.29043	3.1023
CTD-2541J13.1	5.90579	2.56213	2.97301	0.407055	1.69003	13.9694	2.5801e-13	8.26607e-13	2.60308	2.97098	3.34497	0.468919	0.561497	0.19075
SLX4IP	2.38542	1.25424	3.45537	2.20184	2.82861	13.9347	2.72682e-13	8.70163e-13	3.44532	3.54004	3.38076	2.28106	2.09571	2.22876
CCRN4L	2.51082	1.32816	3.3029	1.97556	2.63923	13.9152	2.8132e-13	8.96064e-13	3.34299	3.36847	3.19724	2.05388	1.8727	2.0001
GPATCH3	2.08215	1.05808	4.14721	3.08916	3.61818	13.9014	2.87586e-13	9.14327e-13	4.17569	4.20132	4.06462	3.14244	3.17991	2.94512
POLR1C	2.02897	1.02075	4.30954	3.28994	3.79974	13.8879	2.93857e-13	9.33183e-13	4.26934	4.37797	4.2813	3.15292	3.41985	3.29704
CTD-3099C6.9	2.24742	1.16827	3.92867	2.75907	3.34387	13.8843	2.95551e-13	9.3748e-13	3.78809	3.97515	4.02276	2.88605	2.73971	2.65145
MAP2K6	2.22937	1.15664	3.51562	2.35888	2.93725	13.8714	3.01746e-13	9.55806e-13	3.53315	3.49805	3.51565	2.33114	2.42426	2.32123
RP11-582J16.5	5.17074	2.37037	2.27992	-0.0852819	1.09732	13.8462	3.14207e-13	9.92989e-13	2.24472	2.51538	2.07967	-0.352483	-0.00752407	0.104162
NR1D1	2.80642	1.48873	3.20424	1.71861	2.46143	13.8111	3.32434e-13	1.04794e-12	3.28438	3.29011	3.03825	1.55045	1.7747	1.83068
AC074212.6	4.0595	2.0213	2.53863	0.517329	1.52798	13.8076	3.34323e-13	1.05341e-12	2.65383	2.42048	2.54157	0.277871	0.851004	0.423112
AC053503.6	3.18186	1.66987	3.00353	1.33281	2.16817	13.7815	3.48658e-13	1.09506e-12	2.98358	2.89653	3.13048	1.13717	1.6088	1.25244
FRS3	2.69791	1.43184	3.2702	1.8378	2.554	13.7557	3.6346e-13	1.13636e-12	3.22327	3.3167	3.27061	1.83707	2.05833	1.61799
ZBTB20	4.82793	2.2714	2.09412	-0.180387	0.956866	13.7139	3.88821e-13	1.21014e-12	2.0742	1.97376	2.23439	0.0576049	-0.406794	-0.19197
ZNF233	7.19128	2.84625	1.91453	-0.927705	0.493413	13.6996	3.97968e-13	1.23665e-12	1.68554	2.15171	1.90634	-1.33285	-0.682429	-0.76783
NEFL	2.89121	1.53167	2.76106	1.2291	1.99508	13.6891	4.04795e-13	1.25673e-12	2.82178	2.74159	2.71982	1.27147	1.24623	1.16958
CRLF1	2.61417	1.38635	3.12699	1.74256	2.43478	13.6878	4.05591e-13	1.25851e-12	3.19418	3.15417	3.03264	1.6226	1.76545	1.83964
YY2	4.06373	2.02281	2.19657	0.17405	1.18531	13.6474	4.33061e-13	1.33723e-12	2.26352	2.10161	2.22458	-0.00314916	0.252866	0.272433
RP11-156E6.1	2.03976	1.0284	4.37733	3.3501	3.86372	13.6325	4.43689e-13	1.36882e-12	4.42355	4.41536	4.29309	3.20756	3.51673	3.32602
RP4-742J24.2	6.55517	2.71263	1.47965	-1.23366	0.122995	13.6133	4.57747e-13	1.40966e-12	1.35838	1.50385	1.57671	-1.18476	-1.30587	-1.21035
ZSCAN20	2.47815	1.30926	3.2672	1.95706	2.61213	13.6029	4.65528e-13	1.43202e-12	3.38652	3.19297	3.22211	2.03889	1.94001	1.89227
PRICKLE1	2.25795	1.17502	3.5097	2.33496	2.92233	13.6005	4.67372e-13	1.43705e-12	3.61594	3.45081	3.46236	2.30004	2.3333	2.37153
NDUFA11	2.03418	1.02445	3.88502	2.86132	3.37317	13.5645	4.95636e-13	1.51716e-12	3.91241	3.90386	3.83878	2.84355	2.79529	2.94512
ZNF460	3.57788	1.83911	3.1354	1.29267	2.21403	13.5452	5.11492e-13	1.56465e-12	2.87775	3.10416	3.42428	1.4745	1.20578	1.19774
AC012314.8	6.77173	2.75952	1.74748	-1.01167	0.367903	13.5262	5.2761e-13	1.61001e-12	1.77996	1.91696	1.54552	-0.659665	-1.08905	-1.2863
RP11-226L15.5	2.19784	1.13608	3.55545	2.4183	2.98688	13.5046	5.46564e-13	1.66379e-12	3.59382	3.47856	3.59397	2.43211	2.4762	2.3466
ZNF420	2.08059	1.05699	3.90313	2.84667	3.3749	13.4807	5.68427e-13	1.72613e-12	3.80102	3.96118	3.94719	2.81744	2.7816	2.94096
RP11-536C5.7	5.32886	2.41383	1.95963	-0.455182	0.752224	13.4206	6.27321e-13	1.89036e-12	1.97505	2.06024	1.8436	-0.0665745	-0.584581	-0.714391
CTB-51J22.1	3.21009	1.68261	2.61828	0.936313	1.7773	13.4018	6.47002e-13	1.94582e-12	2.7436	2.52301	2.58824	0.788609	1.00038	1.01995
ZNF77	2.19397	1.13354	3.60435	2.47172	3.03803	13.319	7.41809e-13	2.21881e-12	3.6803	3.5735	3.55925	2.40898	2.40652	2.59965
CASC15	2.4765	1.3083	3.6409	2.32969	2.9853	13.3016	7.63482e-13	2.27818e-12	3.50183	3.59177	3.8291	2.47728	2.34577	2.16603
CENPBD1	2.26121	1.17709	3.50097	2.32538	2.91318	13.2871	7.8203e-13	2.32796e-12	3.47385	3.61338	3.41568	2.33114	2.2429	2.40209
NNAT	3.95276	1.98286	2.15103	0.167546	1.15929	13.2487	8.33354e-13	2.47378e-12	2.12648	2.13188	2.19473	0.0870486	0.403545	0.0120437
OPCML	3.15672	1.65843	2.5637	0.904189	1.73395	13.2032	8.98922e-13	2.65751e-12	2.68902	2.44479	2.5573	0.908903	0.968497	0.835166
SHROOM2	2.18103	1.12501	3.52292	2.39803	2.96047	13.2014	9.01549e-13	2.6647e-12	3.62686	3.45879	3.48309	2.36157	2.41837	2.41414
ARHGAP5-AS1	3.1731	1.66589	2.47577	0.811545	1.64366	13.1962	9.09465e-13	2.68521e-12	2.50381	2.52301	2.40051	0.696097	0.885561	0.852977
AC005754.8	3.02639	1.5976	2.97492	1.37348	2.1742	13.1703	9.4959e-13	2.79647e-12	3.02272	2.76109	3.14096	1.4856	1.40949	1.22535
ZNF879	2.52406	1.33575	3.14031	1.80618	2.47325	13.1487	9.84422e-13	2.89223e-12	3.13416	3.18818	3.0986	1.7569	1.66956	1.99209
CTB-33O18.3	3.68519	1.88174	2.23421	0.351306	1.29276	13.143	9.93882e-13	2.91628e-12	2.16698	2.16153	2.37412	0.328057	0.279097	0.446764
NAPA-AS1	9.3275	3.22149	2.16072	-1.06707	0.546823	13.1271	1.02056e-12	2.98817e-12	2.47989	1.69166	2.31059	-0.760948	-1.22992	-1.21035
RP11-382A20.2	5.6015	2.48581	1.57705	-0.908525	0.334263	13.0987	1.07026e-12	3.12174e-12	1.71315	1.48834	1.52967	-1.05045	-0.733959	-0.941162
CTA-29F11.1	2.60897	1.38348	2.92151	1.53891	2.23021	13.0874	1.09075e-12	3.17745e-12	3.01719	2.91985	2.82748	1.49661	1.58797	1.53216
RP1-191J18.66	2.95227	1.56182	2.67295	1.11013	1.89154	13.0573	1.14722e-12	3.33487e-12	2.67505	2.68827	2.65553	1.1924	1.23287	0.905129
RP1-39G22.7	2.25302	1.17186	3.42715	2.25726	2.84221	13.0519	1.15779e-12	3.36133e-12	3.45353	3.50578	3.32214	2.1685	2.26932	2.33397
ZFPM2	4.25984	2.0908	1.92434	-0.167387	0.878477	13.0262	1.20893e-12	3.50166e-12	1.89292	1.83347	2.04663	-0.275521	-0.105928	-0.120711
MSTO1	2.00878	1.00632	4.83382	3.82926	4.33154	13.0077	1.24697e-12	3.60274e-12	4.87851	4.90751	4.71545	3.62386	4.02093	3.84299
LL22NC03-86G7.1	2.851	1.51147	2.74351	1.23357	1.98854	12.9419	1.39354e-12	3.9968e-12	2.78972	2.73503	2.70578	1.03512	1.37342	1.29215
CHSY3	3.81605	1.93208	2.45201	0.519715	1.48586	12.868	1.57945e-12	4.50367e-12	2.64669	2.3621	2.34723	0.696097	0.198927	0.66412
LINC00938	2.15684	1.10892	3.67552	2.56813	3.12182	12.8629	1.59304e-12	4.53866e-12	3.73857	3.77234	3.51565	2.59468	2.51535	2.59436
IL20RB	3.759	1.91035	2.39807	0.489255	1.44366	12.8431	1.64755e-12	4.68521e-12	2.16698	2.57534	2.45189	0.468919	0.355046	0.6438
HOXA9	3.1465	1.65375	2.37872	0.725588	1.55216	12.8407	1.65418e-12	4.7031e-12	2.43914	2.39575	2.30128	0.770575	0.644553	0.761637
CA5B	2.05545	1.03945	3.64919	2.60898	3.12908	12.7861	1.81547e-12	5.14041e-12	3.63049	3.59901	3.71807	2.64998	2.51535	2.6616
TTC30B	2.30215	1.20298	3.20757	2.00348	2.60553	12.78	1.83457e-12	5.19234e-12	3.2565	3.16397	3.20225	2.07608	2.05074	1.88363
ZNF484	2.61491	1.38676	3.1677	1.78119	2.47444	12.7195	2.03445e-12	5.71917e-12	3.04462	3.31231	3.14616	1.95355	1.57744	1.81259
EML6	7.57516	2.92128	2.52446	-0.402036	1.06121	12.7171	2.0429e-12	5.74059e-12	2.13671	2.40404	3.03264	-0.392561	-0.248532	-0.565014
EVI2A	2.8853	1.52872	2.99034	1.46023	2.22528	12.7169	2.04349e-12	5.74108e-12	3.00607	2.793	3.17193	1.37058	1.3612	1.64891
RP11-452L6.5	4.47132	2.1607	1.77327	-0.386521	0.693376	12.7026	2.09406e-12	5.87355e-12	1.65739	1.85782	1.80461	-0.392561	-0.538039	-0.228964
ZNF613	2.29913	1.20109	3.42124	2.22257	2.82191	12.6638	2.2383e-12	6.25642e-12	3.4412	3.50962	3.31291	2.14069	2.12493	2.40209
CCL2	2.2855	1.19251	4.81345	3.62399	4.21872	12.6625	2.24342e-12	6.26944e-12	4.92501	5.02506	4.49028	3.58052	3.5814	3.71004
AC046143.3	5.03006	2.33057	1.50073	-0.828294	0.33622	12.6212	2.40837e-12	6.70449e-12	1.56948	1.5192	1.41352	-0.927598	-0.842893	-0.714391
RNF152	2.49289	1.31782	3.2195	1.90316	2.56133	12.6164	2.42843e-12	6.75488e-12	3.38222	3.24928	3.027	1.93747	1.82898	1.94304
OSR1	2.16846	1.11667	3.43715	2.32235	2.87975	12.5609	2.67254e-12	7.37971e-12	3.42877	3.50192	3.38076	2.18901	2.35196	2.42609
RP11-701H24.7	4.66305	2.22127	1.88112	-0.34297	0.769075	12.5448	2.74805e-12	7.5749e-12	1.80583	1.75785	2.07967	-0.167269	-0.632676	-0.228964
ACER2	4.45508	2.15545	1.86069	-0.291156	0.784767	12.5347	2.7963e-12	7.69835e-12	1.86857	1.96258	1.75092	-0.51994	-0.365572	0.0120437
NOTCH2NL	2.14394	1.10026	5.26959	4.16801	4.7188	12.5245	2.84609e-12	7.82161e-12	5.22867	5.22667	5.35344	4.43139	3.83452	4.23811
KCNH1-IT1	5.11636	2.35512	1.8027	-0.54833	0.627186	12.5135	2.90092e-12	7.96115e-12	1.68554	2.0707	1.65187	-0.760948	-0.365572	-0.518471
SLFN11	2.58671	1.37112	2.88624	1.51731	2.20177	12.5087	2.92546e-12	8.02371e-12	2.94916	2.90824	2.80131	1.34644	1.56683	1.63868
MAGEE1	2.41941	1.27466	3.10082	1.82535	2.46308	12.5069	2.93428e-12	8.04629e-12	3.22807	3.04176	3.03264	1.95355	1.74678	1.77571
C7orf13	2.15824	1.10985	3.54433	2.43644	2.99039	12.4721	3.11715e-12	8.51714e-12	3.59753	3.60261	3.43283	2.29374	2.54267	2.47292
LINC00115	3.10159	1.63301	2.34938	0.716401	1.53289	12.4604	3.18145e-12	8.67903e-12	2.41412	2.37058	2.26344	0.770575	0.797564	0.581065
RP4-657D16.3	5.41788	2.43773	2.16708	-0.276151	0.945467	12.4291	3.35954e-12	9.13948e-12	2.16698	1.95131	2.38297	0.225876	-0.787398	-0.266932
AC012531.25	2.04377	1.03123	3.77134	2.73871	3.25502	12.4134	3.45243e-12	9.3699e-12	3.76519	3.76913	3.77969	2.92326	2.66708	2.62578
MTSS1	3.62831	1.8593	2.28395	0.421169	1.35256	12.4	3.53432e-12	9.57348e-12	2.20637	2.21905	2.42643	0.576633	0.582713	0.104162
ANKAR	3.71253	1.8924	2.05673	0.167073	1.1119	12.3775	3.67543e-12	9.93001e-12	1.9636	2.22842	1.97819	0.0576049	0.171182	0.272433
S1PR1	3.17064	1.66478	2.46214	0.800416	1.63128	12.3714	3.71494e-12	1.00289e-11	2.37143	2.66776	2.34723	0.71508	0.815598	0.870571
KLHL17	2.05988	1.04256	4.26634	3.22505	3.74569	12.3484	3.86761e-12	1.04185e-11	4.23642	4.37164	4.19095	3.08157	3.4691	3.12447
KCNJ15	3.05194	1.60973	2.46705	0.855505	1.66128	12.3207	4.06005e-12	1.0907e-11	2.58077	2.3189	2.5015	0.858571	0.984527	0.723418
LYPD1	2.34269	1.22817	3.00251	1.77419	2.38835	12.3076	4.15435e-12	1.11516e-11	3.0662	2.93137	3.00996	1.70087	1.85537	1.76634
RAB20	2.15618	1.10848	3.23196	2.12311	2.67754	12.2731	4.41344e-12	1.17918e-11	3.2518	3.20725	3.23683	2.10515	2.2092	2.055
B3GALT5	2.32461	1.21699	3.12722	1.9105	2.51886	12.2438	4.64709e-12	1.23751e-11	3.18435	3.15908	3.03825	2.03134	1.76545	1.9347
PCDH19	3.36432	1.75031	2.16699	0.415693	1.29134	12.2299	4.76205e-12	1.26616e-11	2.00886	2.20962	2.28249	0.468919	0.403545	0.374614
ZKSCAN3	2.03717	1.02656	3.75822	2.73035	3.24429	12.199	5.02894e-12	1.33095e-11	3.78159	3.69674	3.79635	2.88186	2.56417	2.74504
KRTAP2-3	4.59513	2.20011	1.77764	-0.424663	0.676491	12.1959	5.05714e-12	1.33764e-11	1.89292	1.74486	1.69516	-0.0993645	-0.406794	-0.76783
PARS2	2.18671	1.12876	3.37573	2.24559	2.81066	12.1921	5.09095e-12	1.34606e-11	3.38222	3.30789	3.43709	2.37357	2.08087	2.28233
PCDHB8	3.04767	1.60771	2.50726	0.896733	1.702	12.1276	5.70614e-12	1.49891e-11	2.6323	2.30125	2.58824	0.957538	0.952287	0.780373
CTU1	2.00993	1.00715	3.75232	2.74603	3.24918	12.1204	5.77981e-12	1.51797e-11	3.80423	3.70011	3.75263	2.57404	2.83562	2.82843
ZNF844	2.81814	1.49475	2.65009	1.15427	1.90218	12.115	5.83525e-12	1.53136e-11	2.49588	2.74159	2.71282	1.33421	1.04692	1.08168
BDNF-AS	5.04237	2.3341	1.84683	-0.489549	0.678642	12.0926	6.07216e-12	1.5902e-11	1.69941	1.71851	2.12258	-0.433784	-0.842893	-0.19197
RP11-157P1.4	3.89819	1.9628	2.24348	0.28513	1.26431	12.0509	6.5402e-12	1.70529e-11	2.38007	2.39575	1.95463	0.225876	0.114038	0.515476
HIC1	2.46236	1.30004	2.96707	1.66918	2.31812	12.0364	6.7111e-12	1.74555e-11	2.88384	3.08366	2.9337	1.49661	1.80209	1.70882
FOXF1	2.42681	1.27906	3.00197	1.72486	2.36342	12.0266	6.82988e-12	1.7751e-11	3.02272	3.14925	2.83395	1.74771	1.72786	1.69901
AC147651.4	2.82935	1.50047	2.36506	0.864624	1.61484	12.0164	6.95482e-12	1.8062e-11	2.42251	2.3621	2.31059	0.925298	0.815598	0.852977
WDR5B	2.13702	1.0956	3.90423	2.81081	3.35752	12.0115	7.0162e-12	1.82048e-11	3.98782	4.02439	3.70048	2.84355	2.6521	2.93679
TMEM156	2.35916	1.23827	3.38671	2.14623	2.76647	12.0076	7.06473e-12	1.83232e-11	3.19907	3.3557	3.60536	2.18221	2.2092	2.04728
GALK2	2.1721	1.11909	3.20497	2.08536	2.64516	11.8623	9.16843e-12	2.34257e-11	3.20394	3.24928	3.16168	2.23577	2.00432	2.016
PCDHGB2	2.34822	1.23157	2.81388	1.58143	2.19766	11.8592	9.21969e-12	2.35523e-11	2.85314	2.74812	2.84039	1.61251	1.56683	1.56495
DNM3	3.66937	1.87553	2.19859	0.324378	1.26148	11.8143	9.99764e-12	2.54262e-11	2.08481	2.21905	2.29192	0.225876	0.0238401	0.723418
DKK2	3.90076	1.96376	1.73954	-0.222339	0.758599	11.7995	1.02697e-11	2.60842e-11	1.67153	1.79616	1.75092	-0.392561	-0.2865	0.0120437
AP002954.3	4.62159	2.20839	1.49613	-0.71451	0.39081	11.7959	1.03365e-11	2.62443e-11	1.42668	1.42456	1.63715	-0.709418	-0.492951	-0.941162
FAM196B	2.99466	1.58239	2.77969	1.19367	1.98668	11.7085	1.21107e-11	3.04953e-11	2.76354	2.65392	2.9216	1.51839	0.851004	1.21161
SNHG10	2.10953	1.07692	3.44534	2.36989	2.90762	11.7009	1.22797e-11	3.08982e-11	3.42041	3.51729	3.39833	2.21592	2.55346	2.3403
HTR7	2.90648	1.53927	2.50017	0.964047	1.73211	11.6908	1.25085e-11	3.1451e-11	2.43914	2.66086	2.40051	0.752313	1.13573	1.00409
RP11-1094M14.11	2.33885	1.2258	3.5205	2.29848	2.90949	11.6814	1.27244e-11	3.19587e-11	3.54472	3.67634	3.34043	2.04641	2.4591	2.38995
ZNF322	2.15784	1.10958	3.388	2.27942	2.83371	11.6627	1.31643e-11	3.30032e-11	3.35619	3.49028	3.31753	2.37357	2.08087	2.38383
CTD-3065J16.9	3.63254	1.86098	1.90075	0.0397119	0.97023	11.6421	1.36694e-11	3.41844e-11	1.98641	1.95131	1.76453	0.277871	-0.105928	-0.0528074
MYO1H	5.81548	2.5399	1.30741	-1.23486	0.0362746	11.6321	1.39207e-11	3.47538e-11	1.19173	1.42456	1.30594	-0.760948	-1.30587	-1.63777
RP11-61I13.3	3.66748	1.87479	1.99417	0.117043	1.05561	11.6242	1.41229e-11	3.52456e-11	1.97505	1.91696	2.09052	0.115904	0.427196	-0.19197
LA16c-313D11.12	5.11514	2.35477	1.35176	-1.00266	0.174551	11.5973	1.48345e-11	3.69477e-11	1.50775	1.35783	1.18969	-0.760948	-1.30587	-0.941162
TXNDC5	3.0423	1.60516	2.35228	0.750461	1.55137	11.5965	1.48582e-11	3.70002e-11	2.24472	2.56798	2.24414	0.637601	0.760806	0.852977
POLR2I	2.02223	1.01595	3.57896	2.56522	3.07209	11.5398	1.64846e-11	4.08148e-11	3.59011	3.72679	3.41999	2.53718	2.55882	2.59965
SNED1	2.01899	1.01364	3.25308	2.24024	2.74666	11.5398	1.64851e-11	4.08148e-11	3.28897	3.26302	3.20724	2.20253	2.22277	2.29541
GNAT2	3.76225	1.9116	1.6616	-0.251331	0.705137	11.526	1.69097e-11	4.18208e-11	1.65739	1.54941	1.77801	-0.275521	-0.2865	-0.19197
RP11-216L13.19	5.26703	2.39699	1.5888	-0.802167	0.393315	11.5242	1.69656e-11	4.19439e-11	1.58451	1.82114	1.36074	-1.25691	-0.584581	-0.565014
ZBTB49	2.26585	1.18006	3.38436	2.20436	2.79436	11.4386	1.9864e-11	4.87238e-11	3.41622	3.49028	3.24657	2.44921	2.01216	2.15171
CPEB2	3.6057	1.85028	1.74534	-0.106721	0.81931	11.4059	2.1103e-11	5.15973e-11	1.71315	1.70515	1.81772	0.0870486	-0.2865	-0.120711
CTA-204B4.2	2.7166	1.4418	2.54803	1.10621	1.82712	11.4018	2.12616e-11	5.19479e-11	2.7436	2.49999	2.40051	1.17879	1.13573	1.00409
C3orf33	2.40846	1.26811	2.74983	1.48252	2.11617	11.3772	2.22545e-11	5.4239e-11	2.85933	2.78668	2.60347	1.55045	1.45622	1.44089
LAPTM5	2.00721	1.00519	3.44723	2.44281	2.94502	11.3629	2.28524e-11	5.56369e-11	3.5562	3.42252	3.36298	2.44921	2.3333	2.54591
MLK7-AS1	5.20383	2.37957	1.50385	-0.880596	0.311628	11.3454	2.361e-11	5.73695e-11	1.71315	1.17612	1.62228	-0.611571	-0.96073	-1.06949
IPMK	2.01286	1.00924	4.80022	3.79109	4.29565	11.3421	2.37542e-11	5.76893e-11	4.79053	4.87209	4.73804	4.0094	3.45766	3.9062
MAGEA2B	6.38162	2.67392	1.60956	-1.06039	0.274585	11.3391	2.38865e-11	5.79902e-11	1.35838	1.89359	1.57671	-1.05045	-1.65734	-0.473383
MMP16	2.36376	1.24109	3.01233	1.77065	2.39149	11.3231	2.46079e-11	5.96468e-11	2.98923	3.00952	3.03825	1.92937	1.49031	1.89227
RP11-203M5.7	2.62942	1.39474	2.36013	0.965483	1.6628	11.3164	2.49191e-11	6.03264e-11	2.30039	2.35356	2.42643	0.89232	0.968497	1.03563
AC007285.6	4.3869	2.1332	1.50716	-0.624346	0.441408	11.2797	2.66823e-11	6.44474e-11	1.28667	1.70515	1.52967	-0.760948	-0.44923	-0.662861
PTCD1	2.34357	1.22871	2.67077	1.44086	2.05582	11.1841	3.19069e-11	7.63952e-11	2.70286	2.58266	2.72679	1.42924	1.51259	1.38077
LPP-AS2	2.27552	1.1862	2.68448	1.49881	2.09165	11.1591	3.34427e-11	7.98223e-11	2.70286	2.69505	2.65553	1.4856	1.46767	1.54317
EYS	2.85819	1.5151	2.40364	0.889565	1.6466	11.1133	3.64555e-11	8.65772e-11	2.61776	2.30125	2.29192	0.841396	0.760806	1.06649
AC073333.8	4.79423	2.2613	1.13211	-1.13137	0.000367349	11.0378	4.20447e-11	9.91993e-11	1.13161	1.05499	1.20973	-0.869883	-1.38604	-1.1382
RP11-122K13.12	2.91801	1.54498	2.26865	0.720881	1.49477	11.0276	4.28677e-11	1.01037e-10	2.23523	2.16153	2.4092	0.733816	0.935892	0.492934
DNAH10OS	3.98854	1.99586	1.68255	-0.315673	0.683436	10.9955	4.55543e-11	1.07112e-10	1.47587	1.59358	1.97819	-0.352483	-0.365572	-0.228964
PRR4	2.0168	1.01206	3.09983	2.08724	2.59353	10.9921	4.58488e-11	1.07749e-10	3.15947	3.05762	3.08239	2.11233	2.11768	2.03173
RP11-186N15.3	3.96827	1.98851	1.5822	-0.404708	0.588746	10.9572	4.89955e-11	1.1481e-10	1.5543	1.79616	1.39614	-0.275521	-0.325494	-0.613108
RP11-199F11.2	3.02706	1.59792	2.13691	0.538803	1.33786	10.9462	5.00339e-11	1.17104e-10	2.26352	1.96258	2.18464	0.328057	0.644553	0.6438
AC073046.25	3.58211	1.84081	1.82288	-0.0197815	0.90155	10.9392	5.07034e-11	1.1857e-10	1.86857	1.8087	1.79137	0.35251	-0.325494	-0.08636
SPRED3	2.98393	1.57721	2.09941	0.519901	1.30966	10.8932	5.53538e-11	1.28984e-10	2.06352	2.10161	2.13311	0.80642	0.403545	0.349739
PXN-AS1	3.50701	1.81024	2.09597	0.289013	1.19249	10.8889	5.58123e-11	1.29964e-10	2.31848	2.15171	1.81772	0.0870486	0.561497	0.218495
NAALAD2	4.32689	2.11333	1.44444	-0.669187	0.387625	10.8562	5.94128e-11	1.37951e-10	1.37576	1.30568	1.65187	-0.927598	-0.733959	-0.346004
AC069278.4	2.71726	1.44215	2.15242	0.710048	1.43123	10.8385	6.14673e-11	1.4236e-10	2.19662	2.18096	2.07967	0.824014	0.70385	0.602281
ZXDA	2.13822	1.09641	3.34836	2.25282	2.80059	10.8122	6.46468e-11	1.49371e-10	3.53315	3.32982	3.18211	2.33728	2.08087	2.3403
SOX6	3.49121	1.80373	1.58562	-0.21813	0.683747	10.7566	7.19442e-11	1.65537e-10	1.45966	1.70515	1.59206	-0.132917	-0.175469	-0.346004
PCDHGA6	3.88574	1.95819	1.34688	-0.610201	0.368341	10.7334	7.52394e-11	1.72426e-10	1.28667	1.35783	1.39614	-0.760948	-0.682429	-0.387226
RP11-203B9.4	4.21239	2.07464	1.25475	-0.821037	0.216855	10.725	7.64644e-11	1.75175e-10	1.15193	1.25158	1.36074	-0.659665	-1.08905	-0.714391
SERPINB10	3.62667	1.85865	1.40455	-0.45479	0.474878	10.7151	7.7934e-11	1.78274e-10	1.35838	1.42456	1.4307	-0.392561	-0.406794	-0.565014
HTR1D	2.26564	1.17992	2.56622	1.38624	1.97623	10.714	7.80972e-11	1.78558e-10	2.55047	2.57534	2.57285	1.37058	1.44468	1.34345
PRICKLE3	2.06837	1.0485	3.52896	2.48371	3.00633	10.7055	7.93908e-11	1.81455e-10	3.55239	3.66259	3.3719	2.26182	2.62167	2.56764
LIN37	2.24691	1.16794	3.01352	1.84722	2.43037	10.6375	9.05794e-11	2.05456e-10	3.06083	3.08881	2.89091	1.71036	2.10307	1.72825
PLEKHG1	3.60322	1.84929	1.55626	-0.295238	0.630511	10.5749	1.02289e-10	2.31024e-10	1.52344	1.40817	1.73718	-0.392561	-0.105928	-0.387226
RP11-732M18.3	3.38715	1.76007	2.03325	0.275093	1.15417	10.5699	1.03306e-10	2.33167e-10	2.11618	2.21905	1.76453	0.555724	0.0238401	0.245716
RP11-553A10.1	3.75633	1.90932	1.45006	-0.455576	0.497241	10.5296	1.11742e-10	2.51177e-10	1.45966	1.62229	1.26823	-0.611571	-0.44923	-0.305926
LINC00472	2.4595	1.29837	2.30348	1.00569	1.65459	10.5	1.18413e-10	2.65521e-10	2.27282	2.33633	2.30128	1.01993	0.885561	1.11158
RP11-43N5.1	3.30697	1.72551	2.03536	0.307353	1.17136	10.4995	1.18524e-10	2.65727e-10	1.85624	1.89359	2.35625	0.225876	0.226148	0.470033
ZNF337	2.055	1.03914	3.16517	2.1239	2.64454	10.4339	1.348e-10	3.00258e-10	3.06083	3.16884	3.26583	2.25535	2.18165	1.9347
AGT	3.22236	1.68812	2.16877	0.483981	1.32637	10.4244	1.37349e-10	3.0549e-10	2.25415	2.37058	1.88157	0.400207	0.779302	0.272433
SOX7	2.12559	1.08786	2.92464	1.83733	2.38099	10.3994	1.44266e-10	3.20201e-10	3.01164	2.98762	2.77465	1.92937	1.86406	1.71857
RP11-469N6.1	3.72275	1.89637	1.47802	-0.418929	0.529547	10.358	1.5654e-10	3.46101e-10	1.56948	1.50385	1.36074	-0.313489	-0.175469	-0.76783
RP5-1074L1.4	2.55738	1.35467	2.54149	1.18349	1.86249	10.3361	1.63455e-10	3.60462e-10	2.64669	2.42048	2.5573	1.39433	1.28558	0.870571
RP5-956O18.2	4.51971	2.17623	1.33676	-0.843941	0.246408	10.3078	1.72879e-10	3.80694e-10	1.58451	1.01224	1.41352	-0.659665	-0.733959	-1.1382
AC009120.6	3.08838	1.62685	2.0073	0.383234	1.19527	10.3054	1.73686e-10	3.82411e-10	2.03097	2.06024	1.93069	0.0275476	0.723086	0.399067
HSD17B1	2.27701	1.18714	2.60361	1.41693	2.01027	10.2826	1.81741e-10	3.99058e-10	2.55811	2.58266	2.67007	1.23248	1.57744	1.44089
BBS12	2.20578	1.14129	2.68661	1.54509	2.11585	10.1592	2.32333e-10	5.04182e-10	2.71657	2.69505	2.64821	1.69131	1.33643	1.60754
TXNDC2	4.29048	2.10114	1.12148	-0.982618	0.069433	10.1542	2.34696e-10	5.09069e-10	1.13161	0.945639	1.28721	-0.760948	-1.30587	-0.881041
CNTNAP3	2.45113	1.29344	2.37589	1.08217	1.72903	10.1425	2.40228e-10	5.20249e-10	2.24472	2.49999	2.38297	1.25859	0.952287	1.03563
RGAG1	3.55802	1.83107	1.56539	-0.267676	0.648859	10.1387	2.42053e-10	5.23953e-10	1.71315	1.28787	1.69516	-0.433784	-0.140279	-0.228964
CTB-113P19.1	3.62188	1.85674	1.52485	-0.335772	0.594539	10.1281	2.47275e-10	5.34331e-10	1.45966	1.39158	1.72331	-0.238527	-0.105928	-0.662861
AC005789.11	2.56595	1.35949	2.20363	0.843858	1.52374	10.1055	2.58719e-10	5.58007e-10	2.23523	2.27437	2.10128	0.989073	0.91931	0.62319
RP11-428J1.4	3.60339	1.84936	1.533	-0.320148	0.606424	10.1051	2.5891e-10	5.5833e-10	1.61411	1.40817	1.57671	-0.0345133	-0.211538	-0.714391
ZNF502	2.23398	1.15962	2.53897	1.38047	1.95972	10.0901	2.66843e-10	5.74537e-10	2.6323	2.5077	2.4769	1.32188	1.29846	1.52106
CDKL5	2.0991	1.06977	3.31568	2.24371	2.7797	10.0752	2.74934e-10	5.90938e-10	3.15445	3.34282	3.44978	2.48836	2.02771	2.21506
TOMM5	2.28864	1.19449	2.80938	1.61872	2.21405	9.96037	3.46578e-10	7.36518e-10	2.8899	2.96538	2.57285	1.45205	1.76545	1.63868
C10orf55	4.13111	2.04653	1.24181	-0.804139	0.218834	9.91976	3.76303e-10	7.97098e-10	1.26818	1.28787	1.16937	-0.987719	-0.2865	-1.1382
LDLRAD4	2.23916	1.16296	2.5236	1.36154	1.94257	9.91637	3.78903e-10	8.02111e-10	2.67505	2.46078	2.43496	1.25859	1.43305	1.39299
ABCA1	2.44192	1.28801	2.29241	1.00439	1.6484	9.8776	4.09947e-10	8.64499e-10	2.18681	2.37058	2.31984	1.13717	0.779302	1.09671
TSPEAR-AS1	3.28072	1.71401	1.77951	0.0687702	0.92414	9.86468	4.20871e-10	8.8604e-10	1.85624	1.98486	1.49743	-0.00314916	0.330171	-0.120711
CTD-2195B23.3	3.17632	1.66735	1.51395	-0.155601	0.679176	9.85942	4.25401e-10	8.94618e-10	1.37576	1.4568	1.7093	-0.0993645	-0.175469	-0.19197
NOS1AP	3.67954	1.87953	1.44842	-0.433948	0.507235	9.83759	4.44749e-10	9.33306e-10	1.64311	1.15663	1.54552	-0.313489	-0.682429	-0.305926
ZNF418	2.4783	1.30935	2.14535	0.833766	1.48956	9.83684	4.45426e-10	9.34585e-10	2.05275	2.09138	2.29192	0.89232	0.885561	0.723418
DNAH10	2.44562	1.2902	2.16059	0.87166	1.51613	9.83488	4.47212e-10	9.37903e-10	2.14687	2.18096	2.15394	0.80642	0.742069	1.06649
SNORD64	5.1949	2.3771	1.21705	-1.15854	0.0292552	9.83445	4.47603e-10	9.38579e-10	0.862418	1.57901	1.20973	-0.814388	-1.65734	-1.0039
RAB3A	2.3488	1.23192	2.3117	1.08209	1.6969	9.78188	4.9835e-10	1.03976e-09	2.41412	2.33633	2.18464	0.957538	1.07714	1.21161
KRT86	2.72912	1.44844	1.92263	0.476653	1.19964	9.78107	4.99175e-10	1.04132e-09	1.85624	2.01765	1.89401	0.225876	0.644553	0.559532
MST1	2.68361	1.42418	2.03845	0.61371	1.32608	9.77035	5.10243e-10	1.06376e-09	1.83126	2.04971	2.23439	0.512974	0.624233	0.703921
AOC2	2.7564	1.46278	2.55331	1.08778	1.82055	9.73503	5.48557e-10	1.13983e-09	2.58824	2.23773	2.83395	0.824014	1.29846	1.14087
RP11-500C11.3	2.17468	1.1208	2.57398	1.45297	2.01347	9.70162	5.8752e-10	1.21675e-09	2.59568	2.63291	2.49334	1.64257	1.31123	1.40512
ACP5	3.16827	1.66369	1.57767	-0.0862874	0.74569	9.67551	6.19948e-10	1.2812e-09	1.8438	1.40817	1.48103	-0.132917	-0.0395853	-0.08636
AP001053.11	3.36212	1.74937	1.72594	-0.0197984	0.853069	9.65885	6.41604e-10	1.32436e-09	1.77996	1.82114	1.57671	-0.433784	0.427196	-0.0528074
HEXIM2	2.62918	1.39461	1.88595	0.491287	1.18862	9.63597	6.72618e-10	1.38567e-09	2.03097	1.79616	1.83072	0.423476	0.603622	0.446764
NLRP3	2.47474	1.30728	2.28792	0.982291	1.63511	9.62371	6.89863e-10	1.41971e-09	2.18681	2.52301	2.15394	1.12303	0.935892	0.887953
MURC	2.74824	1.45851	1.86745	0.406613	1.13703	9.60322	7.19705e-10	1.47802e-09	1.8808	1.73174	1.98982	0.555724	0.171182	0.492934
BACE2	2.25	1.16992	2.60441	1.43365	2.01903	9.50569	8.8114e-10	1.7948e-09	2.75693	2.60441	2.45189	1.64257	1.43305	1.22535
KCNAB1	3.07348	1.61987	2.02138	0.398122	1.20975	9.50019	8.91286e-10	1.81493e-09	1.71315	2.04971	2.30128	0.676861	0.142893	0.374614
FAM103A1	2.22314	1.1526	2.52315	1.37033	1.94674	9.46705	9.55017e-10	1.9381e-09	2.66801	2.49223	2.4092	1.53984	1.17817	1.39299
CBWD3	2.55089	1.351	2.03142	0.681894	1.35666	9.46629	9.5652e-10	1.94058e-09	1.98641	2.0391	2.06874	0.555724	0.518104	0.971855
FAM132A	3.49712	1.80617	1.63028	-0.180916	0.724682	9.46025	9.68666e-10	1.96435e-09	1.72676	1.44077	1.72331	0.0870486	0.0845941	-0.714391
UFSP1	2.37897	1.25034	2.35394	1.10394	1.72894	9.44393	1.00223e-09	2.02912e-09	2.53509	2.29234	2.23439	1.01993	1.33643	0.95546
ARHGDIG	3.46157	1.79143	1.25382	-0.537755	0.35803	9.43783	1.01509e-09	2.05335e-09	1.04734	1.40817	1.30594	-0.51994	-0.325494	-0.76783
SNX15	3.03276	1.60063	1.37401	-0.226976	0.573516	9.41013	1.07564e-09	2.17071e-09	1.4919	1.25158	1.37855	-0.313489	-0.175469	-0.19197
CTB-152G17.6	3.23072	1.69186	1.46576	-0.23007	0.617846	9.40837	1.07962e-09	2.17779e-09	1.37576	1.34066	1.68087	-0.0993645	-0.0723752	-0.518471
LINC00898	2.97972	1.57518	1.57794	0.00113823	0.789539	9.40132	1.09566e-09	2.2082e-09	1.65739	1.57901	1.49743	0.277871	-0.00752407	-0.266932
RP11-479G22.8	2.22026	1.15073	2.32175	1.16924	1.7455	9.40038	1.09782e-09	2.21223e-09	2.38007	2.25616	2.32903	1.28424	1.21939	1.00409
FBXL19-AS1	2.7478	1.45828	1.85989	0.399526	1.12971	9.3832	1.13807e-09	2.28829e-09	1.67153	1.79616	2.11197	0.328057	0.495909	0.374614
RP3-402G11.28	3.32457	1.73317	1.1846	-0.54934	0.317631	9.38051	1.14451e-09	2.30057e-09	1.26818	1.0759	1.20973	-0.659665	-0.325494	-0.662861
ABHD16A	3.16694	1.66309	1.30292	-0.362167	0.470375	9.29911	1.35816e-09	2.7055e-09	1.21122	1.23308	1.46445	-0.392561	-0.175469	-0.518471
KB-1460A1.5	3.42715	1.77701	1.08971	-0.687277	0.201216	9.29301	1.37574e-09	2.73774e-09	1.28667	1.03377	0.948684	-0.611571	-0.682429	-0.76783
RAG1	2.26674	1.18062	2.34422	1.16489	1.75455	9.27889	1.41733e-09	2.81723e-09	2.14687	2.47659	2.4092	1.09432	1.12131	1.27904
FAM196A	3.38143	1.75763	1.36881	-0.38632	0.491247	9.27577	1.42668e-09	2.83501e-09	1.47587	1.28787	1.3427	-0.709418	-0.492951	0.0434079
ADAM32	3.39682	1.76418	1.671	-0.0970843	0.78696	9.26428	1.46172e-09	2.90127e-09	1.35838	1.60801	2.04663	-0.0993645	0.114038	-0.305926
LIPE-AS1	2.09076	1.06403	2.58367	1.51896	2.05132	9.25439	1.4926e-09	2.96042e-09	2.5428	2.5972	2.61102	1.67201	1.29846	1.5864
PLCXD2	2.36994	1.24485	1.97463	0.730139	1.35239	9.2466	1.51738e-09	3.00696e-09	1.98641	2.0068	1.93069	0.80642	0.603622	0.780373
GNGT1	2.5552	1.35344	1.74521	0.3917	1.06846	9.22946	1.57343e-09	3.11354e-09	1.77996	1.66431	1.79137	0.277871	0.427196	0.470033
TCF21	2.32892	1.21966	2.29486	1.07747	1.68616	9.22854	1.57648e-09	3.1187e-09	2.14687	2.52301	2.2147	1.12303	0.968497	1.14087
MALAT1	3.37783	1.7561	9.3465	7.59012	8.46831	9.21935	1.60745e-09	3.17767e-09	8.97758	9.0374	10.0245	7.04559	7.57322	8.15154
C4orf48	2.14648	1.10197	2.37326	1.27324	1.82325	9.17833	1.75355e-09	3.45903e-09	2.47989	2.39575	2.24414	1.16505	1.32389	1.3308
NME1-NME2	2.35913	1.23825	2.30859	1.07405	1.69132	9.16989	1.78528e-09	3.51859e-09	2.37143	2.5077	2.04663	1.01993	1.13573	1.06649
SIGLEC15	2.25243	1.17149	2.29065	1.11896	1.7048	9.16527	1.80288e-09	3.55276e-09	2.36274	2.34497	2.16425	1.32188	1.04692	0.988065
EBLN2	2.9542	1.56277	2.14087	0.583505	1.36219	9.11592	2.00256e-09	3.92934e-09	1.92869	2.57534	1.91856	0.576633	0.450466	0.723418
LINC00622	2.40568	1.26645	2.05002	0.782522	1.41627	9.11453	2.0085e-09	3.94044e-09	2.05275	2.0068	2.09052	0.941508	0.518104	0.887953
RP11-486O12.2	2.73988	1.45411	1.73428	0.282807	1.00854	9.11107	2.02336e-09	3.96789e-09	1.69941	1.97376	1.52967	0.376555	0.226148	0.245716
MTRNR2L12	3.09296	1.62899	1.54964	-0.0806281	0.734506	9.09008	2.11605e-09	4.14316e-09	1.59938	1.48834	1.5612	-0.167269	0.355046	-0.429662
RP3-512B11.3	3.15121	1.65591	1.3964	-0.255895	0.57025	9.06492	2.23294e-09	4.35836e-09	1.24944	1.57901	1.36074	-0.476219	-0.365572	0.0741047
PCDHB7	2.0305	1.02184	2.71958	1.69875	2.20916	9.06292	2.24248e-09	4.37636e-09	2.8899	2.68827	2.58057	1.61251	1.85537	1.62837
RP11-325K4.3	3.34566	1.74229	1.1564	-0.587916	0.284243	9.06141	2.24975e-09	4.38992e-09	1.11099	1.03377	1.32444	-0.709418	-0.2865	-0.76783
ISL2	2.43207	1.28219	2.06187	0.778554	1.42021	8.97535	2.70572e-09	5.24984e-09	2.17693	1.99587	2.01281	0.788609	1.03158	0.515476
COL11A2	2.29087	1.19589	2.28477	1.08541	1.68509	8.95121	2.84995e-09	5.51798e-09	2.17693	2.15171	2.52568	1.10874	1.19204	0.95546
RP11-390E23.6	2.00791	1.00569	2.59986	1.59647	2.09816	8.89209	3.2376e-09	6.23691e-09	2.55811	2.74812	2.49334	1.49661	1.72786	1.56495
TMPPE	2.83873	1.50525	1.57652	0.0694751	0.822998	8.85628	3.49839e-09	6.71108e-09	1.42668	1.63643	1.66645	0.376555	-0.211538	0.0434079
LUZP2	2.59256	1.37438	1.71687	0.341857	1.02936	8.82629	3.73335e-09	7.13292e-09	1.56948	1.85782	1.72331	0.555724	0.279097	0.19075
RP11-797A18.6	3.61915	1.85565	1.19997	-0.653176	0.273399	8.8146	3.8293e-09	7.31014e-09	1.11099	1.56428	0.924638	-0.433784	-0.584581	-0.941162
RARB	2.56964	1.36157	1.79648	0.432709	1.11459	8.79773	3.97224e-09	7.57249e-09	1.7536	1.70515	1.93069	0.617563	0.142893	0.537672
RP4-639F20.1	2.2587	1.17549	2.35161	1.17796	1.76478	8.79465	3.99886e-09	7.62219e-09	2.3972	2.54567	2.11197	1.32188	1.19204	1.01995
AC016722.4	3.75412	1.90848	1.08298	-0.824114	0.129433	8.75702	4.34018e-09	8.24989e-09	1.02548	1.11683	1.10664	-1.25691	-0.211538	-1.0039
CD36	2.21826	1.14943	2.21129	1.06236	1.63683	8.7553	4.35644e-09	8.2785e-09	2.0742	2.34497	2.2147	1.1924	0.868386	1.1263
KRT222	2.55099	1.35106	2.13885	0.790355	1.4646	8.75134	4.39423e-09	8.34569e-09	2.17693	2.37058	1.86902	0.824014	1.03158	0.515476
BACH1-IT1	4.09428	2.03361	1.05061	-0.989418	0.0305937	8.75034	4.40382e-09	8.36276e-09	1.24944	0.615166	1.28721	-0.814388	-0.787398	-1.36647
LINC00973	2.79592	1.48332	1.92073	0.43837	1.17955	8.70727	4.83783e-09	9.15278e-09	1.85624	1.95131	1.95463	0.534508	-0.0723752	0.852977
RGS4	2.31148	1.20882	1.91779	0.708771	1.31328	8.6868	5.05937e-09	9.56006e-09	1.8186	2.02842	1.90634	0.858571	0.644553	0.62319
C17orf97	2.50763	1.32632	1.67515	0.349822	1.01249	8.67039	5.24438e-09	9.89741e-09	1.52344	1.82114	1.68087	0.400207	0.226148	0.423112
SPDYA	3.47278	1.79609	0.968802	-0.829836	0.069483	8.66016	5.36328e-09	1.01149e-08	1.02548	0.6712	1.20973	-0.987719	-0.787398	-0.714391
RP11-96K19.4	3.99523	1.99828	1.27926	-0.72739	0.275934	8.5898	6.25956e-09	1.17152e-08	1.19173	0.922739	1.72331	-0.433784	-0.538039	-1.21035
RP11-431J24.2	2.5984	1.37763	1.68655	0.308683	0.997618	8.57933	6.40548e-09	1.19768e-08	1.58451	1.8087	1.66645	0.35251	0.561497	0.0120437
HOXC-AS2	2.07462	1.05285	2.49631	1.44485	1.97058	8.54617	6.8912e-09	1.28588e-08	2.59568	2.58266	2.31059	1.42924	1.6395	1.2658
ZNF724P	2.31188	1.20907	2.45704	1.24996	1.8535	8.5271	7.18762e-09	1.33901e-08	2.47989	2.58995	2.30128	1.44069	0.833409	1.47579
RP11-182L21.6	2.12946	1.09049	2.19245	1.09968	1.64607	8.5232	7.24986e-09	1.35023e-08	2.18681	2.0707	2.31984	1.20588	0.952287	1.14087
GET4	2.11888	1.08331	2.39623	1.31456	1.8554	8.51775	7.33775e-09	1.36623e-08	2.29126	2.41228	2.48515	1.03512	1.42132	1.48724
RP11-649A18.4	3.06607	1.61639	1.48049	-0.13734	0.671572	8.45994	8.33975e-09	1.54505e-08	1.28667	1.48834	1.66645	0.0870486	-0.632676	0.133606
GREM2	2.83718	1.50446	1.22407	-0.279868	0.472101	8.41535	9.20806e-09	1.69745e-08	1.24944	1.23308	1.18969	-0.433784	0.0238401	-0.429662
ESM1	3.5524	1.82879	1.00704	-0.819104	0.0939678	8.39835	9.5631e-09	1.75936e-08	0.706299	1.25158	1.06324	-0.869883	-1.15777	-0.429662
AC005754.7	3.33247	1.73659	0.915868	-0.819454	0.0482072	8.3628	1.03515e-08	1.89704e-08	0.650265	1.01224	1.0851	-1.05045	-0.842893	-0.565014
HAS2	2.41798	1.2738	1.76568	0.491179	1.12843	8.34215	1.08399e-08	1.98152e-08	1.68554	1.83347	1.77801	0.512974	0.742069	0.218495
FAM212A	2.32978	1.2202	1.90127	0.682231	1.29175	8.31143	1.16105e-08	2.11535e-08	2.1058	1.83347	1.76453	0.534508	0.868386	0.6438
RP11-152N13.16	3.30124	1.72301	1.18515	-0.533775	0.32569	8.28936	1.21989e-08	2.2155e-08	1.02548	1.53438	0.995605	-0.433784	-0.900609	-0.266932
AC005785.2	3.06988	1.61818	1.06885	-0.546344	0.261251	8.28019	1.24521e-08	2.2585e-08	1.11099	1.19536	0.900185	-0.814388	-0.211538	-0.613108
CD101	2.12435	1.08702	2.48059	1.39177	1.93618	8.27372	1.26341e-08	2.28969e-08	2.47183	2.47659	2.49334	1.44069	1.699	1.03563
LINC00843	2.20387	1.14004	2.04872	0.909016	1.47887	8.24321	1.35299e-08	2.4485e-08	1.90494	2.22842	2.01281	1.09432	0.797564	0.835166
ZNF582	2.12541	1.08774	2.16169	1.07367	1.61768	8.21008	1.45764e-08	2.63026e-08	1.92869	2.28338	2.27299	1.09432	1.10673	1.01995
IFI35	2.30891	1.20721	1.69559	0.488987	1.09229	8.2049	1.47475e-08	2.66009e-08	1.71315	1.63643	1.73718	0.303182	0.561497	0.602281
RP11-426C22.5	2.63666	1.39871	1.4683	0.0680058	0.768151	8.20352	1.47933e-08	2.668e-08	1.39293	1.56428	1.44767	0.328057	0.142893	-0.266932
GPR75	2.17195	1.11899	1.96732	0.845947	1.40663	8.1716	1.5897e-08	2.85806e-08	2.01996	1.85782	2.02417	1.03512	0.70385	0.79887
MKRN3	2.15434	1.10725	2.12801	1.02112	1.57456	8.1446	1.68967e-08	3.03183e-08	2.28207	2.17127	1.93069	1.1924	1.00038	0.870571
MMP3	2.42122	1.27573	1.68452	0.412305	1.04841	8.13647	1.72102e-08	3.08406e-08	1.83126	1.75785	1.46445	0.225876	0.473366	0.537672
HRCT1	2.90999	1.54101	0.958604	-0.581658	0.188473	8.13525	1.72576e-08	3.09187e-08	0.934568	0.945639	0.995605	-0.814388	-0.365572	-0.565014
ZIK1	3.03645	1.60238	1.12013	-0.482676	0.318725	8.12426	1.76921e-08	3.16628e-08	0.78647	1.19536	1.37855	-0.611571	-0.44923	-0.387226
RP11-169K16.9	2.29089	1.19591	1.90326	0.705372	1.30432	8.12237	1.77679e-08	3.17902e-08	1.71315	1.91696	2.07967	0.71508	0.885561	0.515476
RP11-366L20.2	4.19457	2.06852	1.79286	-0.279406	0.756728	8.1217	1.77948e-08	3.18301e-08	1.13161	1.88177	2.36521	-0.433784	0.114038	-0.518471
SGIP1	2.29916	1.20111	1.74902	0.549096	1.14906	8.09146	1.90563e-08	3.3998e-08	1.8186	1.70515	1.72331	0.468919	0.379499	0.79887
RP11-10C24.1	2.76672	1.46818	1.13102	-0.333778	0.39862	8.06356	2.03019e-08	3.61452e-08	1.06887	1.30568	1.01851	-0.51994	-0.325494	-0.155901
RP11-785H5.2	2.71395	1.44039	1.50517	0.0666462	0.785906	8.04384	2.12321e-08	3.77476e-08	1.72676	1.57901	1.20973	0.277871	-0.211538	0.133606
PCDHA2	2.76046	1.46491	1.19253	-0.2728	0.459863	8.03305	2.17597e-08	3.86205e-08	1.19173	1.17612	1.20973	-0.0993645	-0.632676	-0.08636
HRH1	2.8138	1.49252	1.34519	-0.148355	0.598417	8.02295	2.22655e-08	3.94978e-08	1.42668	1.34066	1.26823	0.225876	-0.584581	-0.08636
FAM43B	2.0684	1.04851	2.25811	1.20649	1.7323	7.99738	2.36008e-08	4.1791e-08	2.26352	2.10161	2.4092	1.20588	1.40949	1.00409
MIP	2.33927	1.22606	1.68384	0.459748	1.07179	7.9949	2.37344e-08	4.20223e-08	1.7536	1.83347	1.46445	0.576633	0.379499	0.423112
LIFR-AS1	2.63756	1.3992	1.13355	-0.264961	0.434294	7.96816	2.52277e-08	4.46029e-08	1.26818	1.13686	0.995605	-0.202458	-0.325494	-0.266932
WDR63	2.30154	1.2026	1.72324	0.523351	1.1233	7.92214	2.80274e-08	4.93117e-08	1.69941	1.89359	1.57671	0.555724	0.330171	0.684158
AC079807.2	2.33409	1.22286	1.52435	0.301347	0.912847	7.91671	2.83781e-08	4.99031e-08	1.68554	1.4568	1.4307	0.35251	0.279097	0.272433
C14orf37	2.05995	1.04261	1.9409	0.896919	1.41891	7.91604	2.84214e-08	4.99665e-08	1.98641	1.86984	1.96646	1.00459	0.815598	0.870571
RP11-89H19.1	2.64149	1.40135	1.08328	-0.318419	0.38243	7.91352	2.85857e-08	5.0249e-08	1.02548	1.05499	1.16937	-0.433784	-0.175469	-0.346004
AC005519.4	2.57944	1.36706	1.49138	0.125101	0.808242	7.90418	2.92044e-08	5.12841e-08	1.30494	1.48834	1.68087	-0.202458	0.279097	0.298665
MMP24	2.87016	1.52113	1.1584	-0.365002	0.396699	7.88842	3.0279e-08	5.31058e-08	0.957838	1.15663	1.36074	-0.392561	-0.0395853	-0.662861
RP11-597D13.9	2.65708	1.40984	1.16002	-0.246855	0.456584	7.87186	3.14517e-08	5.50756e-08	1.19173	1.26984	1.01851	-0.476219	-0.0723752	-0.19197
TRAPPC5	2.93438	1.55306	0.901045	-0.649263	0.125891	7.79609	3.7443e-08	6.51601e-08	0.910917	1.0759	0.716321	-0.814388	-0.365572	-0.76783
ACRC	2.19943	1.13713	1.94701	0.810846	1.37893	7.76151	4.05546e-08	7.03878e-08	1.67153	2.11177	2.05773	0.696097	0.91931	0.817132
CHST11	2.72906	1.4484	1.05806	-0.39171	0.333175	7.7509	4.15619e-08	7.21089e-08	1.19173	0.875818	1.10664	-0.313489	-0.632676	-0.228964
MAP3K14-AS1	2.49667	1.32001	1.13888	-0.181857	0.478512	7.73295	4.33235e-08	7.50798e-08	1.15193	1.13686	1.12785	-0.0993645	-0.140279	-0.305926
FDXACB1	2.38288	1.2527	1.69493	0.443425	1.06918	7.71517	4.51446e-08	7.81176e-08	1.92869	1.69166	1.46445	0.400207	0.684354	0.245716
SAMD15	2.329	1.21971	1.51743	0.298087	0.907761	7.69475	4.73329e-08	8.18012e-08	1.45966	1.57901	1.51364	0.199159	0.561497	0.133606
RP11-378J18.8	2.24528	1.16689	1.5583	0.390196	0.974251	7.67527	4.95223e-08	8.54453e-08	1.64311	1.42456	1.60725	0.328057	0.518104	0.324428
RASD2	2.65769	1.41017	0.940487	-0.470821	0.234833	7.61508	5.69646e-08	9.78071e-08	0.812233	0.968182	1.04105	-0.433784	-0.365572	-0.613108
AC108463.1	2.41958	1.27476	1.38792	0.113022	0.750471	7.60608	5.81723e-08	9.97686e-08	1.56948	1.25158	1.3427	-0.0345133	0.330171	0.0434079
ZNF221	2.42393	1.27735	1.31656	0.0400157	0.678286	7.55892	6.49418e-08	1.10936e-07	1.23046	1.34066	1.37855	-0.00314916	-0.175469	0.298665
RP11-61J19.4	2.5017	1.32291	1.20427	-0.115301	0.544483	7.55254	6.59168e-08	1.12559e-07	1.19173	1.35783	1.06324	-0.238527	-0.211538	0.104162
SOS1-IT1	2.15432	1.10723	2.39427	1.28444	1.83936	7.53596	6.85246e-08	1.16867e-07	2.33635	2.34497	2.5015	1.63262	0.815598	1.40512
RP5-855D21.3	2.44304	1.28868	1.20978	-0.0765961	0.566592	7.53048	6.94091e-08	1.18317e-07	1.23046	1.35783	1.04105	-0.132917	0.0238401	-0.120711
RAB30-AS1	2.32473	1.21706	1.59915	0.385591	0.992369	7.49407	7.55916e-08	1.28441e-07	1.47587	1.74486	1.57671	0.0576049	0.518104	0.581065
CTA-984G1.5	2.47801	1.30918	1.08135	-0.228783	0.426281	7.4939	7.56205e-08	1.28474e-07	0.957838	1.11683	1.16937	-0.132917	-0.2865	-0.266932
EN1	2.09261	1.0653	1.85493	0.788077	1.32151	7.46864	8.02412e-08	1.36056e-07	1.99768	1.63643	1.93069	0.696097	0.851004	0.817132
YPEL4	2.2187	1.14971	1.47446	0.325002	0.899731	7.45916	8.20474e-08	1.38981e-07	1.58451	1.40817	1.4307	0.225876	0.450466	0.298665
CTD-2203K17.1	2.67556	1.41984	1.65269	0.238176	0.945431	7.4573	8.24087e-08	1.39559e-07	1.8808	1.9285	1.14876	0.328057	0.114038	0.272433
CYP3A5	2.58429	1.36977	1.36644	-0.00324027	0.681599	7.42619	8.86657e-08	1.49878e-07	1.06887	1.40817	1.62228	-0.132917	-0.175469	0.298665
BCYRN1	2.93931	1.55548	0.884279	-0.668027	0.108126	7.41789	9.04153e-08	1.52704e-07	1.02548	0.968182	0.659177	-0.987719	-0.248532	-0.76783
MMP10	2.32824	1.21924	1.8145	0.598607	1.20655	7.4089	9.23519e-08	1.55764e-07	2.05275	1.7835	1.60725	0.468919	0.355046	0.971855
HOXC-AS1	2.24604	1.16739	1.51842	0.351645	0.935031	7.4027	9.37105e-08	1.57978e-07	1.40991	1.66431	1.48103	0.35251	0.539964	0.162461
PDGFRA	3.07926	1.62258	0.881734	-0.746451	0.0676415	7.36472	1.02499e-07	1.72328e-07	0.678554	0.698422	1.26823	-0.392561	-1.02347	-0.823326
RP11-259K5.2	3.50402	1.80901	1.16568	-0.63851	0.263586	7.35915	1.03856e-07	1.74502e-07	1.62868	0.968182	0.900185	-1.11604	-0.842893	0.0434079
C6orf226	2.36074	1.23924	1.65496	0.415674	1.03532	7.3538	1.05177e-07	1.76614e-07	1.91687	1.44077	1.60725	0.400207	0.142893	0.703921
RP3-337H4.8	3.12332	1.64308	1.21355	-0.427966	0.392793	7.3312	1.10954e-07	1.85975e-07	0.957838	1.66431	1.01851	-0.167269	-0.175469	-0.941162
EMILIN2	2.08473	1.05986	2.03885	0.980917	1.50988	7.29085	1.22083e-07	2.03957e-07	2.18681	2.15171	1.77801	0.989073	1.19204	0.761637
RP11-1114A5.4	2.29426	1.19803	1.64287	0.44142	1.04214	7.27953	1.25408e-07	2.09232e-07	1.44326	1.57901	1.90634	0.468919	0.66459	0.19075
HOXB-AS1	2.26788	1.18134	1.33257	0.150722	0.741648	7.22853	1.41566e-07	2.35162e-07	1.23046	1.42456	1.3427	0.225876	0.279097	-0.0528074
RP11-45P15.4	2.64414	1.4028	0.870915	-0.532468	0.169223	7.20162	1.50938e-07	2.50125e-07	1.09009	0.698422	0.824236	-0.476219	-0.733959	-0.387226
RP11-791G15.2	2.68867	1.42689	0.906594	-0.516724	0.194935	7.16744	1.6376e-07	2.7085e-07	1.00328	1.11683	0.599676	-0.611571	-0.325494	-0.613108
CXCL3	2.79073	1.48064	0.828763	-0.650214	0.0892745	7.14782	1.71616e-07	2.83537e-07	0.910917	0.945639	0.629733	-0.760948	-0.248532	-0.941162
AC144652.1	2.04251	1.03034	2.04814	1.02076	1.53445	7.05693	2.13366e-07	3.49823e-07	2.21606	2.21905	1.7093	1.12303	1.00038	0.938877
TSPEAR	2.14357	1.10001	1.48247	0.380604	0.931537	7.03693	2.23872e-07	3.66436e-07	1.64311	1.32328	1.48103	0.512974	0.279097	0.349739
LAMA4	2.3233	1.21618	1.05487	-0.161515	0.446679	6.98874	2.51406e-07	4.09941e-07	1.02548	1.0759	1.06324	-0.202458	0.0238401	-0.305926
NAPSA	2.40122	1.26377	1.354	0.0879119	0.720958	6.96349	2.67187e-07	4.34693e-07	1.68554	1.03377	1.3427	0.0576049	0.226148	-0.0200175
ZNF490	2.49166	1.31711	1.22521	-0.0905663	0.567322	6.9283	2.90886e-07	4.71741e-07	0.837544	1.42456	1.41352	-0.275521	-0.0395853	0.0434079
PCDHB15	2.15388	1.10693	1.57687	0.472589	1.02473	6.86267	3.40986e-07	5.50133e-07	1.68554	1.75785	1.28721	0.617563	0.330171	0.470033
RP11-848P1.2	2.67235	1.41811	1.02897	-0.393837	0.317564	6.8526	3.49421e-07	5.63279e-07	1.32297	0.615166	1.14876	-0.167269	-0.584581	-0.429662
TRPS1	2.07342	1.05201	1.43588	0.383112	0.909498	6.82261	3.7582e-07	6.04346e-07	1.5543	1.30568	1.44767	0.400207	0.279097	0.470033
RP11-422P24.11	2.10648	1.07483	1.32333	0.248318	0.785826	6.79309	4.03787e-07	6.47653e-07	1.34078	1.23308	1.39614	0.144193	0.226148	0.374614
RP11-363E7.4	2.33124	1.2211	1.19372	-0.0227343	0.585495	6.78008	4.16777e-07	6.67553e-07	1.26818	1.34066	0.972335	-0.313489	0.0545369	0.19075
C15orf62	2.49326	1.31803	1.02089	-0.297886	0.361503	6.76838	4.28828e-07	6.86295e-07	1.28667	0.875818	0.900185	-0.352483	0.0238401	-0.565014
LINC00702	2.15057	1.10472	1.31737	0.21286	0.765114	6.76076	4.36871e-07	6.98598e-07	1.50775	1.17612	1.26823	0.0870486	0.279097	0.272433
ZNF772	2.47502	1.30744	0.796934	-0.512852	0.142041	6.74639	4.52445e-07	7.22325e-07	0.678554	0.6712	1.04105	-0.476219	-0.632676	-0.429662
MYH11	2.43748	1.28539	0.714203	-0.572058	0.0710725	6.7402	4.59338e-07	7.32648e-07	0.812233	0.586311	0.744066	-0.565028	-0.632676	-0.518471
RP11-888D10.4	2.45183	1.29386	0.901112	-0.392888	0.254112	6.70513	5.00405e-07	7.95748e-07	1.00328	0.875818	0.824236	-0.476219	-0.0395853	-0.662861
ZBTB11-AS1	2.17616	1.12179	1.11836	-0.00227847	0.558039	6.70209	5.04137e-07	8.01405e-07	1.13161	1.11683	1.10664	-0.132917	-0.00752407	0.133606
PITRM1-AS1	2.33918	1.226	0.829107	-0.39746	0.215823	6.68606	5.24288e-07	8.32571e-07	0.760238	0.802445	0.924638	-0.476219	-0.2865	-0.429662
RP3-355L5.4	2.04657	1.03321	1.58142	0.547032	1.06422	6.66318	5.54494e-07	8.78711e-07	1.72676	1.44077	1.57671	0.468919	0.797564	0.374614
SOSTDC1	2.4589	1.29802	0.949702	-0.347555	0.301074	6.64508	5.79634e-07	9.16859e-07	0.980738	0.968182	0.900185	-0.202458	-0.787398	-0.0528074
RP11-10C24.3	2.03938	1.02813	1.36006	0.332636	0.846346	6.58172	6.77178e-07	1.06502e-06	1.40991	1.44077	1.22949	0.446377	0.279097	0.272433
FAM218A	2.65074	1.40639	0.778467	-0.623591	0.0774377	6.52565	7.77397e-07	1.21624e-06	1.06887	0.827319	0.439211	-0.760948	-0.842893	-0.266932
EFCAB10	2.18998	1.13091	0.986124	-0.144671	0.420726	6.51843	7.91373e-07	1.23726e-06	0.886872	1.0759	0.995605	-0.0665745	-0.211538	-0.155901
RP11-54A4.2	2.4267	1.279	0.681138	-0.597498	0.04182	6.47622	8.78243e-07	1.36902e-06	0.591967	0.851772	0.599676	-0.476219	-0.492951	-0.823326
RAB38	2.3341	1.22287	0.696872	-0.526424	0.085224	6.46144	9.10924e-07	1.41788e-06	0.62141	0.6712	0.798005	-0.611571	-0.44923	-0.518471
CCDC96	2.39941	1.26268	1.12025	-0.139553	0.490348	6.41506	1.02172e-06	1.58601e-06	1.50775	1.05499	0.798005	-0.352483	0.0545369	-0.120711
ZNF23	2.19661	1.13528	1.0575	-0.0789326	0.489283	6.39175	1.08247e-06	1.67748e-06	1.11099	0.851772	1.20973	-0.238527	-0.0723752	0.0741047
AC007383.3	2.44146	1.28775	0.74055	-0.54401	0.09827	6.38467	1.10166e-06	1.70626e-06	0.499848	1.03377	0.688032	-0.709418	-0.44923	-0.473383
RP11-498C9.15	2.47914	1.30984	1.40921	0.100132	0.754671	6.34279	1.22237e-06	1.8864e-06	1.32297	1.19536	1.7093	-0.51994	0.30486	0.515476
RP11-285F7.2	2.39466	1.25982	0.748137	-0.512101	0.118018	6.30446	1.34465e-06	2.06977e-06	0.837544	0.556867	0.849999	-0.814388	-0.248532	-0.473383
MRPL38	2.11478	1.0805	1.28653	0.202542	0.744535	6.17781	1.84453e-06	2.81275e-06	1.47587	1.09651	1.28721	0.423476	0.30486	-0.120711
CTD-2619J13.17	2.52953	1.33887	0.898301	-0.44418	0.22706	6.10832	2.19541e-06	3.33191e-06	0.62141	1.05499	1.01851	-0.00314916	-0.325494	-1.0039
LEPR	2.30771	1.20646	1.16943	-0.0410016	0.564214	6.07456	2.38962e-06	3.61468e-06	1.11099	0.851772	1.54552	-0.00314916	-0.365572	0.245716
RIPK4	2.18646	1.1286	1.107	-0.024416	0.541293	6.05478	2.51142e-06	3.79517e-06	0.980738	0.875818	1.46445	-0.167269	-0.0395853	0.133606
WDR88	2.00354	1.00255	1.37274	0.368307	0.870522	5.99152	2.94505e-06	4.43047e-06	1.59938	1.26984	1.24899	0.637601	0.30486	0.162461
LL22NC03-N27C7.1	2.24945	1.16957	1.129	-0.0419295	0.543534	5.9743	3.07573e-06	4.61947e-06	1.00328	1.21434	1.16937	-0.0345133	0.427196	-0.518471
ROR1	2.35176	1.23374	0.618436	-0.612997	0.00271951	5.92956	3.44351e-06	5.15046e-06	0.467787	0.6712	0.716321	-0.927598	-0.682429	-0.228964
RP11-345P4.7	2.13989	1.09754	0.870395	-0.230153	0.320121	5.89633	3.74529e-06	5.58785e-06	1.04734	0.615166	0.948684	-0.132917	-0.211538	-0.346004
RP11-755F10.3	2.01902	1.01365	1.14566	0.130612	0.638138	5.87794	3.92368e-06	5.84828e-06	1.19173	1.09651	1.14876	0.144193	0.403545	-0.155901
RP11-471B22.2	2.17668	1.12213	0.720834	-0.399177	0.160828	5.82455	4.49201e-06	6.66213e-06	0.862418	0.827319	0.472764	-0.313489	-0.538039	-0.346004
CHRNA9	2.29403	1.19789	0.640386	-0.558584	0.0409011	5.8103	4.6573e-06	6.90206e-06	0.295835	0.725139	0.900185	-0.51994	-0.682429	-0.473383
RP4-555D20.4	2.11788	1.08262	1.0948	0.0130551	0.553926	5.77684	5.07022e-06	7.49299e-06	1.15193	1.13686	0.995605	-0.167269	0.473366	-0.266932
ARHGAP20	2.03823	1.02732	0.826832	-0.202297	0.312267	5.70449	6.09451e-06	8.95091e-06	0.78647	0.698422	0.995605	-0.202458	-0.248532	-0.155901
MTFP1	2.16045	1.11133	0.561331	-0.551114	0.00510859	5.68163	6.45975e-06	9.4681e-06	0.499848	0.615166	0.568979	-0.392561	-0.492951	-0.76783
TCTE3	2.13657	1.0953	0.785952	-0.308124	0.238914	5.63201	7.33107e-06	1.06995e-05	1.06887	0.75137	0.537615	-0.202458	-0.492951	-0.228964
PPP1R36	2.09442	1.06655	0.898522	-0.171969	0.363276	5.62956	7.37709e-06	1.07599e-05	0.862418	0.643455	1.18969	-0.202458	-0.00752407	-0.305926
RP11-1379J22.2	2.22746	1.1554	0.87924	-0.272139	0.303551	5.54276	9.20881e-06	1.33493e-05	0.561909	1.25158	0.824236	-0.565028	0.0545369	-0.305926
RP5-894A10.6	2.09618	1.06776	0.858284	-0.211011	0.323636	5.52562	9.62171e-06	1.39258e-05	0.78647	0.990378	0.798005	0.171938	-0.2865	-0.518471
RP5-1184F4.5	2.0288	1.02062	0.721093	-0.301843	0.209625	5.37861	1.40281e-05	2.00729e-05	0.561909	0.75137	0.849999	-0.0665745	-0.365572	-0.473383
FAM71D	2.09487	1.06686	0.776755	-0.290854	0.242951	5.37255	1.42481e-05	2.03708e-05	1.09009	0.6712	0.568979	-0.167269	-0.140279	-0.565014
AF230666.2	2.15868	1.11015	0.595437	-0.517794	0.0388213	5.32242	1.62084e-05	2.30918e-05	0.650265	0.260735	0.875311	-0.709418	-0.325494	-0.518471
GOLGA6L4	2.07059	1.05004	0.608346	-0.439275	0.0845351	5.18178	2.32872e-05	3.28059e-05	0.295835	0.899469	0.629733	-0.565028	-0.365572	-0.387226
RN7SL832P	2.05429	1.03864	0.599023	-0.441637	0.078693	5.17029	2.3988e-05	3.37621e-05	0.812233	0.296805	0.688032	-0.565028	-0.2865	-0.473383
RP11-143J12.2	2.11993	1.08401	0.80301	-0.281118	0.260946	5.15503	2.49518e-05	3.50683e-05	0.980738	0.922739	0.505554	-0.00314916	-0.0723752	-0.76783
C6orf141	2.11568	1.08112	0.609278	-0.465796	0.0717411	4.90917	4.71236e-05	6.50714e-05	0.467787	0.990378	0.36967	-0.869883	-0.140279	-0.387226
SNORA71B	2.09179	1.06474	0.615182	-0.452324	0.0814287	4.8798	5.08492e-05	7.01314e-05	0.78647	0.586311	0.472764	-0.0665745	-0.2865	-1.0039
RP11-214N9.1	2.06741	1.04782	0.6402	-0.406355	0.116922	4.77518	6.66885e-05	9.11898e-05	0.886872	0.496113	0.537615	-0.392561	-0.900609	0.0741047
HCN2	2.01712	1.0123	0.647939	-0.365002	0.141468	4.63322	9.63672e-05	0.000130287	1.04734	0.296805	0.599676	-0.392561	-0.682429	-0.0200175
SNORD3A	2.18422	1.12712	0.781134	-0.351472	0.214831	4.14043	0.000345056	0.000449083	0.25884	0.432688	1.65187	-0.659665	-0.406794	0.0120437
MASP2	-2.00478	-1.00344	-0.281539	0.715758	0.217109	-4.78497	6.50167e-05	8.90367e-05	-0.280026	-0.616781	0.0521883	0.973392	0.70385	0.470033
RP11-677M14.7	-2.03688	-1.02636	-0.224623	0.804667	0.290022	-4.80821	6.12151e-05	8.39897e-05	-0.650394	0.331994	-0.35547	0.989073	0.644553	0.780373
RP11-613M10.6	-2.04059	-1.02899	-0.335997	0.69332	0.178661	-4.89369	4.90517e-05	6.76863e-05	-0.798493	-0.0206776	-0.18882	0.841396	0.495909	0.742654
CACNA1B	-2.0602	-1.04278	-0.293537	0.751151	0.228807	-4.96772	4.04949e-05	5.61324e-05	0.141801	-0.261686	-0.760726	0.925298	0.624233	0.703921
MYO5B	-2.02088	-1.01498	-0.462427	0.553058	0.0453151	-4.978	3.94318e-05	5.46919e-05	-0.226587	-0.616781	-0.543915	0.512974	0.403545	0.742654
IFI27	-2.04719	-1.03365	-0.238765	0.794632	0.277933	-4.98272	3.89527e-05	5.40546e-05	0.0144216	-0.488457	-0.242259	0.534508	1.10673	0.742654
RP11-378J18.3	-2.13637	-1.09516	-0.0589996	1.04344	0.492222	-5.02063	3.5313e-05	4.91777e-05	0.331904	0.331994	-0.840896	0.989073	1.12131	1.01995
CTA-390C10.10	-2.19743	-1.13582	0.0608292	1.19159	0.62621	-5.11808	2.74493e-05	3.84918e-05	-0.0772089	-0.428336	0.688032	0.875545	1.50149	1.19774
TRIM63	-2.04354	-1.03107	-0.373911	0.658757	0.142423	-5.11946	2.73518e-05	3.83589e-05	-0.453357	-0.37062	-0.297754	0.400207	0.723086	0.852977
GLYCTK	-2.03702	-1.02646	-0.0721135	0.959513	0.4437	-5.13787	2.6082e-05	3.6623e-05	0.220872	0.106702	-0.543915	0.875545	0.833409	1.16958
CCR10	-2.08753	-1.06179	-0.44943	0.609889	0.0802293	-5.19524	2.24925e-05	3.17189e-05	-0.175056	-0.757643	-0.415591	0.617563	0.742069	0.470033
RP11-264B17.2	-2.18618	-1.12841	-0.402852	0.721519	0.159333	-5.2909	1.75782e-05	2.49785e-05	-0.0772089	-0.833592	-0.297754	0.752313	0.91931	0.492934
DPY19L2	-2.07429	-1.05262	-0.0871832	0.966789	0.439803	-5.30713	1.68591e-05	2.39814e-05	0.295835	-0.315125	-0.242259	0.824014	0.851004	1.22535
CTD-2002H8.2	-2.07332	-1.05194	-0.481282	0.571746	0.0452319	-5.3171	1.64318e-05	2.34027e-05	-0.650394	-0.315125	-0.478326	0.512974	0.66459	0.537672
RP11-134O21.1	-2.1315	-1.09187	-0.283798	0.806098	0.26115	-5.37244	1.42522e-05	2.03744e-05	-0.125303	-0.428336	-0.297754	1.06502	0.518104	0.835166
LYPD3	-2.14054	-1.09797	-0.230812	0.864184	0.316686	-5.44813	1.1735e-05	1.68814e-05	0.181878	-0.685493	-0.18882	0.841396	0.952287	0.79887
TMEM17	-2.04183	-1.02986	-0.108659	0.918813	0.405077	-5.44973	1.1687e-05	1.68158e-05	0.141801	-0.428336	-0.0394422	0.989073	0.779302	0.988065
PLAC1	-2.01124	-1.00808	-0.164496	0.842236	0.33887	-5.48603	1.06485e-05	1.53585e-05	0.0144216	-0.37062	-0.137289	0.824014	0.885561	0.817132
CCDC163P	-2.02731	-1.01957	-0.0038009	1.01145	0.503826	-5.51211	9.9605e-06	1.4401e-05	0.100578	-0.37062	0.258639	1.05015	1.06211	0.922102
FAM229A	-2.16597	-1.11501	-0.432846	0.679076	0.123115	-5.52046	9.74972e-06	1.41052e-05	-0.722544	-0.488457	-0.0875365	0.752313	0.70385	0.581065
RP11-77P16.4	-2.05021	-1.03577	-0.203775	0.835112	0.315669	-5.52804	9.56241e-06	1.38429e-05	-0.175056	-0.0206776	-0.415591	0.770575	0.779302	0.95546
PTCSC3	-2.26126	-1.17713	-0.462191	0.715085	0.126447	-5.57051	8.57799e-06	1.24598e-05	-0.878663	-0.37062	-0.137289	0.512974	0.779302	0.852977
RP11-437J19.1	-2.02758	-1.01976	-0.194487	0.824709	0.315111	-5.59281	8.10276e-06	1.17858e-05	-0.335521	-0.160402	-0.0875365	0.841396	0.815598	0.817132
FAM149A	-2.23115	-1.15779	-0.515109	0.638474	0.0616827	-5.60505	7.85344e-06	1.14364e-05	-0.650394	-0.757643	-0.137289	0.676861	0.723086	0.515476
SLC2A14	-2.05664	-1.04029	-0.159957	0.877525	0.358784	-5.62507	7.46204e-06	1.08815e-05	-0.125303	-0.315125	-0.0394422	1.01993	0.851004	0.761637
KCNK5	-2.37363	-1.2471	-0.539558	0.701252	0.0808467	-5.64795	7.03893e-06	1.02885e-05	-0.516093	-0.913762	-0.18882	1.00459	0.561497	0.537672
RALGPS1	-2.35644	-1.23661	-0.199125	1.02987	0.415374	-5.66757	6.69552e-06	9.80321e-06	-0.453357	-0.616781	0.472764	1.09432	1.17817	0.817132
DFNB59	-2.14688	-1.10224	0.0604722	1.15736	0.608914	-5.67336	6.59741e-06	9.66265e-06	0.0144216	-0.37062	0.537615	1.20588	1.00038	1.2658
RP11-839D17.3	-2.12142	-1.08503	-0.284111	0.801656	0.258773	-5.69983	6.16723e-06	9.04997e-06	-0.175056	-0.261686	-0.415591	0.752313	0.968497	0.684158
CUBN	-2.365	-1.24184	-0.557602	0.68083	0.0616139	-5.72176	5.83229e-06	8.57862e-06	-0.798493	-0.685493	-0.18882	0.858571	0.403545	0.780373
RAP2C-AS1	-2.22846	-1.15605	-0.539059	0.616828	0.0388844	-5.77249	5.12654e-06	7.57297e-06	-0.650394	-0.488457	-0.478326	0.696097	0.450466	0.703921
CACNG4	-2.02668	-1.01912	0.366464	1.38142	0.873943	-5.7811	5.01573e-06	7.41486e-06	0.0144216	0.260735	0.824236	1.44069	1.38555	1.31803
RGS7	-2.09403	-1.06628	0.53177	1.59275	1.06226	-5.82499	4.48696e-06	6.65536e-06	0.499848	0.146779	0.948684	1.72916	1.31123	1.73787
MX1	-2.25914	-1.17577	-0.356663	0.816655	0.229996	-5.83984	4.32121e-06	6.41921e-06	-0.175056	-0.757643	-0.137289	0.676861	0.851004	0.922102
COL9A2	-2.20325	-1.13963	-0.127916	1.01048	0.441283	-5.85508	4.15757e-06	6.18214e-06	0.181878	-0.428336	-0.137289	1.05015	0.797564	1.18373
TLE6	-2.42161	-1.27597	-0.587615	0.693489	0.0529371	-5.90535	3.66079e-06	5.46949e-06	-0.280026	-0.37062	-1.1122	0.597243	0.684354	0.79887
AP000696.2	-2.22506	-1.15384	-0.519019	0.635211	0.0580963	-5.91694	3.55511e-06	5.31623e-06	-0.393236	-0.551192	-0.612628	0.637601	0.624233	0.6438
GRHL1	-2.26876	-1.1819	0.00109378	1.17664	0.588867	-5.92002	3.52753e-06	5.27555e-06	0.295835	-0.551192	0.258639	1.35856	1.13573	1.03563
ADCY7	-2.25812	-1.17512	-0.049593	1.12025	0.535331	-5.93747	3.37534e-06	5.0529e-06	-0.125303	-0.428336	0.40486	1.06502	1.32389	0.971855
C10orf35	-2.02429	-1.01741	0.0800126	1.09896	0.589485	-5.96113	3.17966e-06	4.76984e-06	0.141801	0.185773	-0.0875365	1.12303	1.07714	1.09671
C10orf90	-2.37503	-1.24795	-0.516419	0.727235	0.105408	-5.96638	3.13783e-06	4.70966e-06	-0.393236	-0.913762	-0.242259	0.71508	0.885561	0.581065
CACNG8	-2.18752	-1.12929	0.440977	1.56624	1.00361	-5.97858	3.04272e-06	4.5714e-06	0.0581429	0.223741	1.04105	1.3825	1.70868	1.60754
NRIP2	-2.19231	-1.13245	0.301601	1.42849	0.865045	-6.01447	2.77959e-06	4.18844e-06	0.141801	-0.112308	0.875311	1.32188	1.53453	1.42906
MAFG-AS1	-2.18381	-1.12685	0.214755	1.33744	0.776097	-6.0269	2.69391e-06	4.06289e-06	0.331904	-0.160402	0.472764	1.25859	1.59842	1.1553
CTA-211A9.5	-2.04146	-1.0296	0.161928	1.189	0.675463	-6.03856	2.61601e-06	3.94757e-06	0.181878	-0.0657655	0.36967	1.15118	1.24623	1.16958
RNF32	-2.42535	-1.27819	-0.607531	0.666579	0.029524	-6.04414	2.57956e-06	3.89385e-06	-0.581681	-0.998651	-0.242259	0.597243	0.779302	0.62319
MCOLN3	-2.04161	-1.02971	0.488001	1.51991	1.00396	-6.04994	2.54219e-06	3.83997e-06	0.220872	0.643455	0.599676	1.27147	1.61911	1.66916
CTAGE1	-2.45028	-1.29295	-0.605884	0.683935	0.0390255	-6.07764	2.37116e-06	3.58755e-06	-0.581681	-0.757643	-0.478326	0.957538	0.450466	0.6438
ELMO1	-2.4909	-1.31667	-0.523207	0.787784	0.132288	-6.07903	2.36294e-06	3.5759e-06	-0.393236	-1.08885	-0.0875365	0.752313	0.868386	0.742654
NT5M	-2.59823	-1.37753	-0.68217	0.697556	0.00769286	-6.09804	2.25278e-06	3.41483e-06	-0.280026	-0.551192	-1.21529	0.908903	0.624233	0.559532
RP11-361F15.2	-2.08882	-1.06269	0.257231	1.31793	0.787578	-6.21003	1.70172e-06	2.60076e-06	-0.0306663	0.296805	0.505554	1.42924	1.21939	1.30515
TPPP	-2.13232	-1.09242	0.105168	1.19628	0.650723	-6.21503	1.68059e-06	2.56959e-06	-0.0772089	0.0230438	0.36967	1.06502	1.29846	1.22535
ECE2	-2.15675	-1.10886	0.305603	1.42007	0.862836	-6.21998	1.65993e-06	2.53858e-06	0.467787	0.586311	-0.137289	1.27147	1.50149	1.48724
ASPHD1	-2.05287	-1.03764	0.334846	1.37453	0.854686	-6.22529	1.63808e-06	2.50683e-06	0.499848	0.366346	0.138345	1.24559	1.53453	1.34345
XXbac-BPG55C20.7	-2.16336	-1.11327	0.0030809	1.11708	0.560081	-6.25476	1.52193e-06	2.33402e-06	0.25884	-0.112308	-0.137289	1.09432	1.03158	1.22535
TMEM86B	-2.37604	-1.24856	0.836881	2.0815	1.45919	-6.27123	1.46067e-06	2.24208e-06	1.17196	0.366346	0.972335	1.89648	2.52634	1.82166
ADM5	-2.39441	-1.25967	-0.337971	0.918813	0.290421	-6.28729	1.40337e-06	2.1575e-06	-0.335521	-0.685493	0.00710041	0.752313	1.01606	0.988065
PIP5KL1	-2.39863	-1.26221	-0.388755	0.87292	0.242082	-6.31002	1.32617e-06	2.04178e-06	-0.125303	-0.428336	-0.612628	1.07974	0.815598	0.723418
BFSP1	-2.07404	-1.05244	0.500657	1.55618	1.02842	-6.31666	1.30444e-06	2.00903e-06	0.678554	0.52681	0.296607	1.32188	1.7183	1.62837
RHEBL1	-2.30627	-1.20556	-0.123254	1.07921	0.477976	-6.32494	1.27785e-06	1.96981e-06	0.220872	-0.551192	-0.0394422	1.07974	1.10673	1.05114
CTD-2583A14.8	-2.08146	-1.0576	0.231147	1.2883	0.759721	-6.32525	1.27684e-06	1.96848e-06	0.367093	0.106702	0.219645	1.32188	1.15002	1.39299
MAPK8IP2	-2.22312	-1.15259	-0.144443	1.00989	0.432721	-6.33718	1.23953e-06	1.91267e-06	-0.125303	-0.0657655	-0.242259	0.875545	1.15002	1.00409
HDHD3	-2.06666	-1.0473	1.10353	2.14933	1.62643	-6.35118	1.19716e-06	1.84854e-06	1.40991	0.6712	1.22949	1.89648	2.16768	2.38383
B9D2	-2.38732	-1.25539	-0.228597	1.02247	0.396936	-6.36194	1.16559e-06	1.80161e-06	-0.516093	-0.428336	0.258639	1.01993	1.09201	0.95546
ZNF385C	-2.37521	-1.24805	-0.408796	0.840914	0.216059	-6.36409	1.15938e-06	1.79282e-06	-0.125303	-0.488457	-0.612628	0.71508	0.902534	0.905129
HSD17B8	-2.45858	-1.29783	-0.447528	0.848459	0.200465	-6.37285	1.13444e-06	1.75584e-06	-0.0306663	-0.833592	-0.478326	0.824014	0.868386	0.852977
CTA-445C9.15	-2.47702	-1.3086	-0.446566	0.859669	0.206551	-6.43664	9.6854e-07	1.505e-06	-0.393236	-0.757643	-0.18882	0.824014	0.70385	1.05114
MAPT	-2.23964	-1.16327	0.145119	1.31083	0.727973	-6.52051	7.87325e-07	1.23107e-06	0.0581429	0.464749	-0.0875365	1.35856	1.43305	1.14087
C8orf34	-2.1919	-1.13218	0.238893	1.36858	0.803736	-6.52763	7.73624e-07	1.21075e-06	0.220872	0.0230438	0.472764	1.41769	1.17817	1.50987
INSR	-2.01154	-1.0083	0.698986	1.70508	1.20203	-6.54081	7.48909e-07	1.1734e-06	0.980738	0.399898	0.716321	1.70087	1.76545	1.64891
KLHDC7B	-2.80767	-1.48937	-0.698269	0.797911	0.0498212	-6.5559	7.21577e-07	1.13187e-06	-0.453357	-0.315125	-1.32632	0.637601	0.885561	0.870571
ZNF497	-2.29717	-1.19986	0.135957	1.33807	0.737015	-6.56071	7.13092e-07	1.11882e-06	0.531213	0.065479	-0.18882	1.20588	1.49031	1.31803
ATG16L2	-2.31178	-1.20901	-0.0358777	1.17411	0.569117	-6.56781	7.00752e-07	1.10021e-06	0.0581429	0.0230438	-0.18882	1.10874	1.40949	1.00409
RP11-206L10.9	-2.39781	-1.26172	-0.0819287	1.17476	0.546415	-6.62496	6.08946e-07	9.61343e-07	-0.280026	-0.37062	0.40486	1.21924	1.16416	1.14087
CTD-2196E14.4	-2.26652	-1.18048	0.0148552	1.19349	0.60417	-6.63415	5.95384e-07	9.41014e-07	0.0581429	-0.0206776	0.00710041	1.37058	1.20578	1.00409
TRPC3	-2.75132	-1.46012	-0.482099	0.982489	0.250195	-6.65457	5.66311e-07	8.96921e-07	0.0581429	-0.488457	-1.01598	0.858571	0.91931	1.16958
SH3BP5	-2.55753	-1.35475	-0.192071	1.15875	0.483338	-6.66632	5.50244e-07	8.72278e-07	0.0144216	-0.551192	-0.0394422	1.3825	0.868386	1.22535
LINC01088	-2.23531	-1.16048	0.0225442	1.18384	0.603192	-6.6792	5.33166e-07	8.46279e-07	-0.175056	0.146779	0.0959097	1.15118	1.12131	1.27904
ACADS	-2.00889	-1.0064	0.826628	1.8339	1.33027	-6.71718	4.85884e-07	7.73374e-07	0.934568	0.945639	0.599676	2.00844	1.7747	1.71857
MIR17HG	-2.39043	-1.25727	0.319596	1.57321	0.946401	-6.73307	4.67396e-07	7.44982e-07	0.295835	0.223741	0.439211	1.71979	1.80209	1.19774
KNDC1	-2.04353	-1.03107	0.6248	1.65461	1.1397	-6.74012	4.5942e-07	7.32694e-07	0.434997	0.615166	0.824236	1.59212	1.7747	1.59701
PDE6B	-2.09982	-1.07026	0.810171	1.87907	1.34462	-6.74395	4.55147e-07	7.26469e-07	0.886872	0.643455	0.900185	1.72916	2.16064	1.74742
CCDC144NL	-2.30049	-1.20194	-0.110598	1.09092	0.490161	-6.77878	4.18108e-07	6.69529e-07	-0.0306663	-0.112308	-0.18882	1.20588	1.04692	1.01995
ZNF554	-2.17354	-1.12005	0.331156	1.45228	0.891719	-6.78178	4.15062e-07	6.64961e-07	0.0581429	0.496113	0.439211	1.39433	1.39757	1.56495
ICA1L	-2.8863	-1.52922	-0.597921	0.934914	0.168497	-6.79196	4.04905e-07	6.49293e-07	-1.05375	-0.261686	-0.478326	0.676861	0.902534	1.22535
RP11-1L9.1	-2.54529	-1.34783	-0.44943	0.902418	0.226494	-6.81223	3.85416e-07	6.19126e-07	-0.453357	-0.210155	-0.684777	0.752313	0.91931	1.03563
WBSCR27	-3.1084	-1.63617	-0.803027	0.840577	0.0187752	-6.83169	3.67614e-07	5.91358e-07	-0.516093	-0.315125	-1.57786	0.752313	0.952287	0.817132
MAP2	-2.54025	-1.34497	-0.159065	1.18723	0.514083	-6.83867	3.61439e-07	5.82244e-07	-0.650394	0.260735	-0.0875365	1.24559	1.21939	1.09671
NLGN3	-2.56822	-1.36077	-0.421091	0.942803	0.260856	-6.85997	3.43231e-07	5.53495e-07	-0.280026	-0.37062	-0.612628	0.770575	0.902534	1.1553
RP11-24B19.3	-2.23378	-1.15949	0.27016	1.42928	0.84972	-6.86536	3.3877e-07	5.46622e-07	0.181878	0.331994	0.296607	1.40606	1.62934	1.25244
HYLS1	-2.15582	-1.10823	0.651772	1.76516	1.20847	-6.88357	3.24143e-07	5.24005e-07	0.706299	0.990378	0.258639	1.69131	1.83783	1.76634
RP11-452F19.3	-2.07956	-1.05628	0.702771	1.76196	1.23236	-6.91529	3.00181e-07	4.86471e-07	0.886872	0.851772	0.36967	1.81084	1.70868	1.76634
FLT4	-2.08997	-1.06348	0.905201	1.97012	1.43766	-6.95704	2.71377e-07	4.41301e-07	1.17196	0.827319	0.716321	1.81084	2.18165	1.91788
ZBED3-AS1	-2.53243	-1.34052	-0.422517	0.916381	0.246932	-6.96533	2.66004e-07	4.32922e-07	-0.226587	-0.685493	-0.35547	0.908903	0.868386	0.971855
RP11-305E6.4	-3.15238	-1.65644	-0.778269	0.870561	0.0461461	-6.96703	2.64914e-07	4.31301e-07	-1.05375	-1.28816	0.00710041	0.925298	0.833409	0.852977
PTPRG-AS1	-2.80205	-1.48648	0.0248467	1.51503	0.769939	-6.97067	2.62596e-07	4.2768e-07	0.367093	0.185773	-0.478326	1.71036	1.13573	1.69901
ANXA3	-3.21999	-1.68706	-0.478634	1.20739	0.364379	-6.98499	2.53684e-07	4.13508e-07	-1.36409	-0.210155	0.138345	1.13717	1.09201	1.39299
C12orf76	-2.10249	-1.0721	0.865294	1.94176	1.40353	-6.98557	2.53329e-07	4.12977e-07	1.09009	0.968182	0.537615	1.78412	1.94821	2.09296
TMEM161B-AS1	-2.39903	-1.26245	-0.0934213	1.16779	0.537185	-6.99422	2.48103e-07	4.04699e-07	-0.175056	-0.0657655	-0.0394422	1.34644	1.01606	1.14087
CYP2R1	-2.52569	-1.33667	-0.110598	1.22369	0.556545	-6.99512	2.47569e-07	4.03875e-07	-0.516093	-0.112308	0.296607	1.16505	1.33643	1.16958
SLC15A3	-2.41367	-1.27123	0.199935	1.47479	0.837365	-7.02131	2.32442e-07	3.80101e-07	0.531213	0.366346	-0.297754	1.55045	1.42132	1.45262
ACSS3	-2.03577	-1.02558	0.713392	1.73808	1.22574	-7.03168	2.26717e-07	3.70959e-07	0.837544	0.643455	0.659177	1.80199	1.78389	1.62837
ZNF782	-3.10771	-1.63585	-0.623868	1.00768	0.191907	-7.04301	2.20625e-07	3.61293e-07	-1.05375	-0.913762	0.0959097	0.875545	0.935892	1.21161
PRDM16	-2.85252	-1.51224	-0.606968	0.901269	0.14715	-7.04308	2.20586e-07	3.61272e-07	-0.798493	-0.833592	-0.18882	1.03512	0.66459	1.00409
RELL2	-2.12768	-1.08928	0.535416	1.62192	1.07867	-7.06089	2.11348e-07	3.46604e-07	0.650265	0.296805	0.659177	1.69131	1.57744	1.59701
XXbac-BPGBPG55C20.2	-2.64647	-1.40407	-0.519019	0.883928	0.182455	-7.07001	2.0677e-07	3.39494e-07	-0.516093	-0.685493	-0.35547	0.858571	0.742069	1.05114
C5	-2.37889	-1.25029	0.192796	1.44254	0.817669	-7.07791	2.02889e-07	3.33401e-07	0.591967	-0.0206776	0.00710041	1.44069	1.55614	1.3308
COL9A3	-2.04514	-1.0322	1.00411	2.03709	1.5206	-7.08822	1.97934e-07	3.25375e-07	1.17196	0.990378	0.849999	1.96944	2.24955	1.89227
TMEM180	-2.56676	-1.35995	-0.382436	0.979495	0.298529	-7.08833	1.97881e-07	3.25328e-07	-0.581681	-0.210155	-0.35547	0.841396	1.00038	1.09671
MAMSTR	-2.55943	-1.35582	0.248736	1.59907	0.923903	-7.12178	1.82646e-07	3.01217e-07	0.25884	-0.112308	0.599676	1.60235	1.86406	1.3308
RP11-30P6.6	-2.99371	-1.58193	-0.703049	0.875359	0.0861551	-7.12874	1.79627e-07	2.9631e-07	-1.05375	-0.757643	-0.297754	1.07974	0.624233	0.922102
C9orf85	-2.05678	-1.04039	1.47661	2.51216	1.99439	-7.1653	1.64598e-07	2.72203e-07	1.15193	1.32328	1.95463	2.60998	2.36426	2.56224
PRSS53	-3.15263	-1.65656	-0.337599	1.31057	0.486485	-7.18329	1.57681e-07	2.61173e-07	-0.453357	-0.998651	0.439211	1.23248	1.50149	1.19774
POLR2J4	-2.27004	-1.18272	0.561331	1.74553	1.15343	-7.18985	1.55231e-07	2.57147e-07	0.650265	0.464749	0.568979	1.56098	1.65961	2.016
MYO15B	-2.16537	-1.11461	1.22008	2.3392	1.77964	-7.21414	1.46501e-07	2.42978e-07	1.35838	1.50385	0.798005	2.28741	2.56417	2.16603
OR2T33	-2.05616	-1.03996	0.976587	2.01388	1.49524	-7.22753	1.41906e-07	2.35669e-07	1.06887	0.6712	1.18969	1.91302	2.05074	2.0779
ZNF852	-2.46096	-1.29922	0.158008	1.45342	0.805715	-7.22928	1.41315e-07	2.34773e-07	-0.0306663	0.065479	0.439211	1.68169	1.28558	1.39299
VLDLR	-2.32204	-1.21539	0.252404	1.46856	0.860484	-7.23139	1.40607e-07	2.33681e-07	-0.0772089	0.464749	0.36967	1.46332	1.42132	1.52106
ZFPL1	-2.14646	-1.10196	0.606278	1.71035	1.15831	-7.24707	1.35458e-07	2.25343e-07	0.467787	0.75137	0.599676	1.57143	1.75614	1.80346
LAT2	-2.31962	-1.21389	0.0987015	1.31253	0.705616	-7.2496	1.34646e-07	2.241e-07	0.220872	-0.0206776	0.0959097	1.24559	1.31123	1.38077
TMEM51	-2.09643	-1.06794	0.710001	1.77897	1.24449	-7.25247	1.33734e-07	2.22635e-07	0.561909	0.851772	0.716321	1.71036	1.89831	1.72825
GMPR	-2.4259	-1.27852	-0.0217326	1.25425	0.61626	-7.2572	1.32238e-07	2.20199e-07	0.100578	-0.261686	0.0959097	1.25859	1.34887	1.1553
NTRK1	-2.91775	-1.54486	-0.547315	0.999969	0.226327	-7.25893	1.31693e-07	2.19318e-07	-0.0306663	-0.685493	-0.925785	0.925298	0.91931	1.1553
NAPRT1	-2.02675	-1.01917	1.04106	2.05795	1.5495	-7.26462	1.29926e-07	2.16427e-07	1.11099	0.802445	1.20973	1.95355	2.18858	2.03173
BMS1P18	-2.55534	-1.35352	-0.373109	0.979246	0.303069	-7.27544	1.2663e-07	2.11117e-07	-0.335521	-0.428336	-0.35547	1.07974	0.935892	0.922102
ANKRD39	-2.58866	-1.37221	-0.291531	1.07791	0.39319	-7.27577	1.2653e-07	2.11001e-07	-0.393236	-0.488457	0.00710041	1.01993	1.17817	1.03563
KCNIP2	-2.76169	-1.46555	-0.268221	1.19558	0.463677	-7.27772	1.25948e-07	2.10081e-07	-0.722544	-0.261686	0.179568	1.05015	1.31123	1.22535
PITPNM3	-2.51076	-1.32813	0.121062	1.44678	0.78392	-7.28844	1.22784e-07	2.05002e-07	-0.175056	0.065479	0.472764	1.51839	1.24623	1.57571
C1orf192	-2.15174	-1.10551	0.610715	1.71571	1.16321	-7.29075	1.22114e-07	2.03972e-07	0.531213	0.556867	0.744066	1.69131	1.59842	1.8574
RNF182	-2.15286	-1.10625	0.815804	1.92603	1.37091	-7.29561	1.20715e-07	2.01695e-07	0.886872	1.05499	0.505554	1.94553	1.79302	2.03952
KIAA1161	-2.54692	-1.34876	0.00449066	1.35091	0.6777	-7.30694	1.17514e-07	1.96562e-07	0.331904	-0.37062	0.0521883	1.39433	1.20578	1.45262
ADPRHL1	-2.6105	-1.38433	-0.182179	1.20116	0.509488	-7.3079	1.17246e-07	1.96138e-07	-0.125303	-0.428336	0.00710041	1.06502	1.12131	1.41714
AC012307.3	-2.22707	-1.15514	0.537904	1.68983	1.11387	-7.31514	1.15253e-07	1.92922e-07	0.591967	0.223741	0.798005	1.63262	1.7183	1.71857
ZNF572	-2.05111	-1.0364	0.994139	2.03	1.51207	-7.32869	1.11613e-07	1.86988e-07	0.910917	1.0759	0.995605	2.20924	1.8727	2.00807
PIWIL4	-2.74807	-1.45842	-0.187981	1.26492	0.538469	-7.35197	1.05632e-07	1.77358e-07	-0.175056	-0.685493	0.296607	1.20588	1.33643	1.25244
SLC37A1	-2.37552	-1.24824	0.180122	1.42843	0.804274	-7.36108	1.03383e-07	1.73751e-07	0.467787	0.065479	0.00710041	1.42924	1.51259	1.34345
MSH5	-2.50453	-1.32454	0.410192	1.73606	1.07313	-7.36569	1.02264e-07	1.71953e-07	0.760238	0.331994	0.138345	1.61251	2.01996	1.57571
MPZ	-2.79058	-1.48057	-0.549146	0.934163	0.192508	-7.4148	9.10755e-08	1.53705e-07	-0.516093	-0.37062	-0.760726	0.941508	0.779302	1.08168
SH3BGR	-2.61397	-1.38624	-0.228544	1.15656	0.464008	-7.45224	8.3393e-08	1.41191e-07	0.100578	-0.488457	-0.297754	1.17879	1.12131	1.16958
CTC-241F20.3	-2.36897	-1.24426	0.453592	1.6966	1.0751	-7.46367	8.1183e-08	1.37568e-07	0.0581429	0.586311	0.716321	1.78412	1.57744	1.72825
RP11-525K10.3	-2.829	-1.50029	-0.367603	1.13091	0.381655	-7.46489	8.09518e-08	1.37193e-07	-0.650394	-0.315125	-0.137289	1.30944	0.885561	1.19774
NUDT8	-2.78044	-1.47532	-0.568385	0.904722	0.168169	-7.49017	7.62867e-08	1.29574e-07	-0.393236	-0.833592	-0.478326	0.908903	0.952287	0.852977
PTGIR	-2.55527	-1.35348	0.126587	1.48099	0.803791	-7.504	7.3851e-08	1.25577e-07	0.220872	-0.0206776	0.179568	1.20588	1.59842	1.63868
HCN3	-2.25505	-1.17316	0.665425	1.838	1.25171	-7.50771	7.32112e-08	1.24535e-07	0.760238	0.464749	0.771287	1.63262	1.98054	1.90085
CHI3L1	-2.68817	-1.42663	-0.230309	1.19349	0.481588	-7.50971	7.28696e-08	1.23969e-07	-0.175056	-0.428336	-0.0875365	1.37058	0.984527	1.22535
BTN3A3	-2.1766	-1.12208	0.890639	2.00913	1.44988	-7.51177	7.2518e-08	1.23402e-07	0.760238	0.643455	1.26823	1.92937	2.05074	2.04728
RP11-119F19.2	-2.72258	-1.44498	-0.00136546	1.43803	0.718333	-7.5182	7.14334e-08	1.21586e-07	-0.226587	-0.315125	0.537615	1.53984	1.29846	1.47579
CCDC24	-3.46955	-1.79475	-0.674759	1.1154	0.220319	-7.51841	7.13993e-08	1.21543e-07	-0.650394	-1.18506	-0.18882	0.858571	1.46767	1.01995
PRSS27	-2.94456	-1.55805	-0.543975	1.01495	0.235485	-7.52567	7.01953e-08	1.19568e-07	-0.963552	-0.37062	-0.297754	0.841396	1.07714	1.1263
SHANK2	-2.25531	-1.17333	0.470685	1.6453	1.05799	-7.53684	6.83835e-08	1.16641e-07	0.295835	0.643455	0.472764	1.66226	1.54538	1.72825
NR2E1	-2.76335	-1.46642	-0.196702	1.26639	0.534844	-7.5449	6.71059e-08	1.14518e-07	-0.0306663	-0.37062	-0.18882	1.49661	1.29846	1.00409
AC108488.4	-2.153	-1.10635	1.04104	2.15116	1.5961	-7.56488	6.4044e-08	1.09443e-07	1.00328	1.26984	0.849999	1.96944	2.33955	2.14449
NEK8	-2.03578	-1.02558	1.01252	2.0395	1.52601	-7.57228	6.29459e-08	1.0766e-07	0.862418	1.15663	1.01851	1.95355	2.11768	2.04728
ARRDC1	-2.05154	-1.03671	1.08783	2.12267	1.60525	-7.61606	5.68351e-08	9.76142e-08	0.980738	1.03377	1.24899	2.10515	2.26276	2.0001
DMBX1	-2.64148	-1.40135	-0.228248	1.17059	0.471172	-7.64039	5.37042e-08	9.24286e-08	-0.226587	-0.37062	-0.0875365	1.21924	1.27258	1.01995
FAM122C	-2.53453	-1.34172	0.137647	1.47614	0.806895	-7.65076	5.24245e-08	9.0294e-08	-0.125303	0.065479	0.472764	1.50754	1.57744	1.34345
BTBD11	-2.48146	-1.31119	0.174964	1.48837	0.831667	-7.68228	4.87231e-08	8.41403e-08	0.295835	0.366346	-0.137289	1.58181	1.49031	1.39299
VWF	-2.76723	-1.46844	-0.0868279	1.3758	0.644485	-7.70405	4.63231e-08	8.01065e-08	-0.0306663	-0.488457	0.258639	1.49661	1.43305	1.19774
OFD1	-2.10079	-1.07093	0.899927	1.96996	1.43494	-7.71194	4.54839e-08	7.86848e-08	1.04734	0.802445	0.849999	2.06872	1.88982	1.95133
DDX60	-2.22451	-1.15349	1.03869	2.19177	1.61523	-7.71491	4.51719e-08	7.81551e-08	0.980738	1.11683	1.01851	2.41479	1.93176	2.22876
THEM4	-2.36452	-1.24154	0.442596	1.68724	1.06492	-7.71881	4.47661e-08	7.75016e-08	0.62141	0.52681	0.179568	1.63262	1.59842	1.83068
ADAMTS17	-2.89969	-1.5359	-0.628788	0.908302	0.139757	-7.71942	4.47028e-08	7.74116e-08	-0.516093	-0.685493	-0.684777	0.752313	0.968497	1.00409
ORAI3	-2.69035	-1.42779	-0.0258048	1.40213	0.688162	-7.74824	4.18183e-08	7.25445e-08	0.0581429	0.106702	-0.242259	1.59212	1.44468	1.16958
PLAC8	-2.48859	-1.31533	0.362443	1.67956	1.021	-7.77195	3.95883e-08	6.87454e-08	0.467787	0.399898	0.219645	1.71036	1.44468	1.88363
BRICD5	-2.15933	-1.11059	1.61459	2.72513	2.16986	-7.7778	3.90577e-08	6.78499e-08	1.26818	1.74486	1.83072	2.5425	2.98652	2.64636
TMEM42	-2.03842	-1.02745	1.11552	2.14286	1.62919	-7.79445	3.75851e-08	6.53826e-08	0.980738	1.11683	1.24899	2.06132	2.12493	2.24234
C1RL	-2.22519	-1.15393	0.806253	1.96178	1.38402	-7.81235	3.60655e-08	6.28107e-08	1.04734	0.802445	0.568979	1.90478	2.08831	1.89227
CTD-3193O13.9	-2.90464	-1.53836	-0.563109	0.973374	0.205132	-7.8468	3.33162e-08	5.8207e-08	-0.453357	-0.757643	-0.478326	0.957538	1.09201	0.870571
ENTPD1-AS1	-2.01165	-1.00838	1.83867	2.8444	2.34154	-7.84739	3.32709e-08	5.81352e-08	1.77996	1.75785	1.97819	3.07424	2.59059	2.86838
RP11-101E13.5	-2.34148	-1.22742	1.10987	2.33938	1.72462	-7.87641	3.1125e-08	5.45243e-08	0.812233	1.28787	1.22949	2.06132	2.54267	2.41414
MDGA1	-2.69563	-1.43062	-0.336914	1.09444	0.378766	-7.8812	3.07851e-08	5.39564e-08	-0.280026	-0.315125	-0.415591	1.07974	1.09201	1.11158
STAT6	-2.00416	-1.003	1.392	2.39524	1.89362	-7.89636	2.97324e-08	5.21912e-08	1.23046	1.54941	1.39614	2.44353	2.49311	2.24908
RP11-18I14.10	-2.79251	-1.48156	-0.419653	1.06417	0.322259	-7.90519	2.91367e-08	5.11783e-08	-0.453357	-0.261686	-0.543915	0.989073	1.07714	1.1263
HSPB7	-2.13663	-1.09534	0.94362	2.03999	1.4918	-7.9097	2.88375e-08	5.06657e-08	1.04734	1.01224	0.771287	2.06872	2.12493	1.92631
ARHGAP6	-2.81213	-1.49166	-0.322836	1.16595	0.421557	-7.93682	2.71012e-08	4.77433e-08	-0.175056	-0.551192	-0.242259	1.30944	1.10673	1.08168
CABYR	-2.10928	-1.07675	1.1518	2.22895	1.69038	-7.94257	2.67474e-08	4.71563e-08	1.35838	0.990378	1.10664	2.0834	2.27584	2.32762
SRCRB4D	-3.30306	-1.7238	-0.817174	0.904008	0.0434166	-7.95579	2.59509e-08	4.58107e-08	-0.581681	-1.18506	-0.684777	0.80642	1.10673	0.79887
SMPD3	-2.81199	-1.49159	-0.196702	1.2952	0.549247	-7.96317	2.5517e-08	4.5068e-08	-0.0306663	-0.261686	-0.297754	1.1924	1.5236	1.16958
FCGBP	-3.37366	-1.75432	-0.449937	1.30496	0.427512	-7.9646	2.54339e-08	4.49386e-08	-1.14997	-0.160402	-0.0394422	1.16505	1.28558	1.46425
CCDC40	-2.62441	-1.392	-0.0242357	1.36927	0.672517	-7.98658	2.41896e-08	4.28115e-08	-0.226587	0.146779	0.00710041	1.25859	1.45622	1.39299
F11R	-2.45816	-1.29758	0.140076	1.43821	0.789142	-7.98953	2.40272e-08	4.25351e-08	0.0581429	0.223741	0.138345	1.44069	1.42132	1.45262
AC007405.6	-3.00551	-1.58761	-0.259677	1.32809	0.534205	-8.00767	2.3054e-08	4.08544e-08	0.0144216	-0.315125	-0.478326	1.52915	1.06211	1.39299
USP43	-2.31389	-1.21032	0.53725	1.74896	1.14311	-8.03582	2.16229e-08	3.83926e-08	0.434997	0.6712	0.505554	1.67201	1.84663	1.72825
PPIP5K1	-2.30137	-1.20249	0.558596	1.75881	1.1587	-8.03948	2.14438e-08	3.80992e-08	0.650265	0.366346	0.659177	1.81084	1.73735	1.72825
NOX5	-3.30024	-1.72257	-0.857373	0.863776	0.00320149	-8.04044	2.1397e-08	3.80308e-08	-0.722544	-1.08885	-0.760726	0.733816	1.07714	0.780373
SCN1B	-2.44188	-1.28799	0.364257	1.64936	1.00681	-8.04609	2.1124e-08	3.75699e-08	0.401445	0.185773	0.505554	1.71036	1.72786	1.50987
ALG10	-2.56869	-1.36103	0.390477	1.75192	1.0712	-8.05128	2.08763e-08	3.71342e-08	0.591967	0.399898	0.179568	1.94553	1.53453	1.77571
ACBD7	-2.63008	-1.39511	0.217787	1.61062	0.914201	-8.05362	2.07655e-08	3.69466e-08	0.367093	0.106702	0.179568	1.8543	1.49031	1.48724
GK	-2.18841	-1.12988	0.802118	1.93337	1.36774	-8.06532	2.02206e-08	3.60098e-08	0.78647	0.875818	0.744066	1.91302	1.85537	2.03173
MYH7B	-2.84588	-1.50887	-0.121031	1.38735	0.633159	-8.07833	1.96324e-08	3.4994e-08	-0.393236	-0.0657655	0.0959097	1.24559	1.59842	1.31803
NICN1	-2.95948	-1.56534	0.098566	1.66767	0.883116	-8.08857	1.91819e-08	3.42177e-08	-0.280026	0.615166	-0.0394422	1.59212	1.88982	1.52106
CTC-277H1.7	-3.13176	-1.64697	-0.534698	1.10922	0.28726	-8.10547	1.84609e-08	3.29615e-08	-0.581681	-0.833592	-0.18882	0.973392	1.27258	1.08168
ACBD4	-2.88867	-1.53041	-0.112157	1.42314	0.655494	-8.11421	1.80989e-08	3.23572e-08	-0.335521	0.296805	-0.297754	1.25859	1.46767	1.54317
JAKMIP3	-2.11452	-1.08033	1.02536	2.10543	1.56539	-8.14173	1.70067e-08	3.04985e-08	1.09009	0.990378	0.995605	2.17537	1.99643	2.14449
SLC9A9	-3.01977	-1.59444	-0.324743	1.27205	0.473654	-8.14325	1.69482e-08	3.04067e-08	-0.581681	0.0230438	-0.415591	1.37058	1.07714	1.36844
THAP2	-2.19811	-1.13626	0.859368	1.99566	1.42751	-8.16576	1.61082e-08	2.89451e-08	0.706299	0.899469	0.972335	1.96152	1.94001	2.08545
LL22NC03-N14H11.1	-2.9382	-1.55493	-0.0607194	1.49747	0.718377	-8.17371	1.58216e-08	2.84523e-08	-0.393236	0.399898	-0.18882	1.45205	1.65961	1.38077
[truncated: 2,076 more rows]

## Sheet: S1B Hela Spliceostatin
Table S1B Differentially expressed genes in Hela cells treated by spliceostatin A (GSE72055)
Gene	Fold Change	log2FC	Mean_SSA	Mean_Control	Mean_all_samples	t	P.Value	adj.P.Val	Control_rep1	Control_rep2	Control_rep3	Hela_SSA_rep1	Hela_SSA_rep2	Hela_SSA_rep3
RAD1	14.367	3.84469	13.9361	10.0986	12.0173	40.0653	4.71222e-14	4.12361e-10	10.1452	9.87279	10.2778	13.9422	14.0275	13.8385
C1orf122	24.7878	4.63156	11.4293	6.79913	9.1142	38.9577	6.56104e-14	4.12361e-10	6.93849	6.67238	6.78651	11.393	11.5176	11.3772
THRA	31.3682	4.97123	10.7123	5.74472	8.2285	33.4953	3.89449e-13	1.32685e-09	5.48619	5.87044	5.87755	10.6267	10.7761	10.734
SLC38A10	12.7879	3.67671	10.4015	6.72827	8.56486	32.4453	5.66566e-13	1.32685e-09	6.66972	6.70663	6.80846	10.3988	10.3985	10.407
ANKLE2	25.7195	4.68479	10.2438	5.55353	7.89866	32.2394	6.10631e-13	1.32685e-09	5.75109	5.49268	5.41682	10.2479	10.2781	10.2053
AC005523.2	6.06964	2.60161	13.8275	11.229	12.5283	32.0996	6.42674e-13	1.32685e-09	11.1873	11.1158	11.3841	13.865	13.9102	13.7072
WRAP53	11.5128	3.52516	11.6729	8.14577	9.90933	31.7211	7.38898e-13	1.32685e-09	8.1562	8.0858	8.19532	11.693	11.8073	11.5183
ADAMTS13	42.2333	5.40031	10.5117	5.11188	7.81179	30.8865	1.01094e-12	1.58843e-09	5.13317	5.03447	5.168	10.5563	10.6259	10.3529
LZTR1	12.3968	3.63189	10.3152	6.68993	8.50258	30.2665	1.2829e-12	1.79179e-09	6.67953	6.6373	6.75296	10.225	10.3297	10.391
RPL28	8.19574	3.03487	10.7938	7.76255	9.27817	29.2535	1.91346e-12	2.18656e-09	7.80364	7.73388	7.75013	10.7016	10.8023	10.8775
IMPDH2	5.37387	2.42596	11.9956	9.56992	10.7827	28.9732	2.14235e-12	2.24411e-09	9.45724	9.58475	9.66775	12.0237	12.0371	11.926
DNHD1	13.7292	3.77918	10.2014	6.42816	8.31476	28.5036	2.59513e-12	2.49263e-09	6.42333	6.276	6.58516	10.266	10.2446	10.0935
NTMT1	9.95772	3.31582	11.1667	7.85929	9.513	28.3401	2.7762e-12	2.49263e-09	7.66725	7.77481	8.13582	11.1951	11.1896	11.1154
GPS1	8.06805	3.01222	10.8674	7.85914	9.36326	27.6819	3.65694e-12	3.06452e-09	7.78557	7.91689	7.87495	10.7864	10.8147	11.001
TADA2B	19.7994	4.30739	9.88414	5.58699	7.73557	27.4703	4.00098e-12	3.14327e-09	5.44075	5.55039	5.76984	9.76914	10.0139	9.86942
ABR	10.5202	3.39509	10.4986	7.11093	8.80475	26.9613	4.98109e-12	3.63889e-09	6.91375	7.17259	7.24645	10.4069	10.4704	10.6184
EME2	6.32148	2.66026	12.8101	10.1605	11.4853	26.8045	5.33316e-12	3.63889e-09	10.0233	10.1553	10.3031	12.6594	12.8058	12.9651
TMEM184A	4.29156	2.1015	12.6276	10.5343	11.581	26.7188	5.53689e-12	3.63889e-09	10.4823	10.4751	10.6454	12.5246	12.6516	12.7067
KLB	7.65815	2.937	11.0898	8.15591	9.62285	26.444	6.24923e-12	3.63889e-09	8.19092	8.0124	8.26442	11.0739	11.2208	10.9747
RAC1	21.3074	4.41328	9.53419	5.11438	7.32428	26.4291	6.29076e-12	3.63889e-09	4.95069	5.25879	5.13365	9.64581	9.46855	9.48821
MFSD11	3.67164	1.87642	13.8882	12.0165	12.9523	26.4012	6.36878e-12	3.63889e-09	11.8725	12.0157	12.1612	13.8308	13.9641	13.8698
SMARCD2	9.03158	3.17498	9.5461	6.36976	7.95793	25.4848	9.6281e-12	5.26197e-09	6.35148	6.40675	6.35106	9.49827	9.60242	9.53762
CFB	6.74887	2.75465	10.8176	8.07014	9.44387	25.2206	1.08754e-11	5.69597e-09	7.8907	8.03952	8.28021	10.7875	10.8513	10.814
CRLF1	6.35455	2.66779	11.189	8.53222	9.86062	24.6795	1.40111e-11	7.04479e-09	8.55844	8.34149	8.69672	11.0807	11.2625	11.2239
TEAD3	13.5288	3.75796	9.31084	5.55631	7.43357	24.2548	1.71584e-11	8.29545e-09	5.57299	5.56913	5.52679	9.1994	9.27745	9.45567
TM7SF2	10.6612	3.41429	9.41845	6.01507	7.71676	24.1088	1.84113e-11	8.2971e-09	5.99066	5.92963	6.12493	9.30508	9.42434	9.52591
SH3D19	8.82524	3.14164	10.8914	7.75873	9.32506	24.066	1.87964e-11	8.2971e-09	7.94053	7.45035	7.88531	10.8447	11.0051	10.8243
MAN1B1	6.37777	2.67305	10.6062	7.93528	9.27074	24.0285	1.91421e-11	8.2971e-09	7.72999	8.00209	8.07376	10.5782	10.6697	10.5708
KLLN	7.3848	2.88456	10.2334	7.35679	8.79512	23.7054	2.24159e-11	9.39227e-09	7.35454	7.17259	7.54324	10.2219	10.3203	10.1581
AC010761.8	3.19483	1.67574	13.4194	11.7508	12.5851	23.478	2.50815e-11	1.01701e-08	11.7114	11.6221	11.919	13.4382	13.4224	13.3975
PLEKHJ1	5.2692	2.39758	10.1094	7.71148	8.91046	23.2753	2.77498e-11	1.09005e-08	7.70137	7.75857	7.67449	10.064	10.11	10.1543
NNAT	6.35986	2.669	10.1261	7.46405	8.79509	22.8403	3.45697e-11	1.31679e-08	7.29833	7.48036	7.61348	10.0415	10.1513	10.1856
VWA5B2	9.94641	3.31418	9.47372	6.16936	7.82154	22.6904	3.73239e-11	1.34046e-08	5.90959	6.21782	6.38066	9.41168	9.4564	9.55308
OSBPL10	18.411	4.20249	9.54066	5.34533	7.443	22.2575	4.67005e-11	1.62952e-08	5.29514	5.18782	5.55302	9.66182	9.66074	9.29944
B3GALT4	15.4047	3.9453	8.94447	5.01421	6.97934	22.09	5.09876e-11	1.68662e-08	4.74175	5.03447	5.2664	8.86212	8.9434	9.0279
RAB11FIP3	5.39917	2.43274	10.0518	7.62136	8.83657	21.8246	5.86807e-11	1.89133e-08	7.4551	7.68747	7.7215	10.0132	10.0834	10.0587
AC010761.9	6.86307	2.77885	10.5504	7.78669	9.16857	21.7198	6.2056e-11	1.94451e-08	7.61707	7.68747	8.05552	10.4352	10.5411	10.6751
DDX5	5.57913	2.48004	10.0946	7.60649	8.85055	21.679	6.34249e-11	1.94451e-08	7.60167	7.67455	7.54324	10.1717	10.1558	9.9563
AC135050.5	22.4229	4.4869	8.61016	4.11676	6.36346	21.5863	6.66623e-11	1.96471e-08	4.25632	4.1259	3.96806	8.60737	8.54049	8.68261
S100PBP	11.5389	3.52843	8.91666	5.39542	7.15604	21.5711	6.72095e-11	1.96471e-08	5.21643	5.39104	5.57879	8.87001	9.04096	8.839
MYC	17.2954	4.11232	9.8175	5.67602	7.74676	21.4902	7.02069e-11	2.00568e-08	5.65487	6.10679	5.2664	9.89827	9.6437	9.91052
TTC39A	20.1242	4.33086	8.60615	4.26405	6.4351	21.3979	7.38072e-11	2.06168e-08	4.4057	4.27029	4.11616	8.63079	8.67653	8.51115
WDR83OS	4.81111	2.26637	10.2455	7.98555	9.11555	21.2169	8.14539e-11	2.22582e-08	7.91998	7.90956	8.12711	10.1797	10.319	10.238
FHOD1	5.4533	2.44713	10.305	7.86053	9.08275	21.0514	8.92013e-11	2.36529e-08	7.64238	7.93506	8.00416	10.2525	10.3832	10.2792
SLC39A13	7.66976	2.93918	9.33542	6.40279	7.86911	21.0288	9.03212e-11	2.36529e-08	6.16845	6.41713	6.62279	9.3396	9.37874	9.28793
COX4I1	9.22639	3.20577	8.87981	5.66194	7.27087	20.9895	9.23021e-11	2.36783e-08	5.55178	5.85525	5.57879	8.90885	8.93642	8.79416
RMND5B	3.51556	1.81375	12.4669	10.6616	11.5642	20.9417	9.47727e-11	2.38259e-08	10.7773	10.4519	10.7554	12.4266	12.4861	12.4878
ZNF507	13.7966	3.78624	8.57591	4.78488	6.68039	20.8733	9.84377e-11	2.39983e-08	4.85	4.76874	4.73589	8.55935	8.70144	8.46694
CTSH	10.8576	3.44064	9.17937	5.75259	7.46598	20.8581	9.92772e-11	2.39983e-08	5.78784	5.47292	5.99701	9.29632	9.18921	9.05258
EIF3G	4.69791	2.23202	9.67176	7.43631	8.55403	20.537	1.18831e-10	2.71583e-08	7.40274	7.51459	7.3916	9.6933	9.65437	9.6676
GALNS	4.58883	2.19813	10.372	8.17848	9.27525	20.4684	1.23527e-10	2.77027e-08	8.05804	8.23699	8.24041	10.3188	10.3055	10.4917
SYT1	41.6665	5.38082	9.30162	3.87949	6.59055	20.4388	1.25621e-10	2.77027e-08	3.90123	4.22374	3.5135	9.43582	9.37358	9.09545
PDE2A	6.8169	2.76912	9.36136	6.59082	7.97609	20.4004	1.28387e-10	2.77413e-08	6.52481	6.6373	6.61036	9.26373	9.53472	9.28562
C4orf36	7.3402	2.87582	8.69683	5.82652	7.26168	20.311	1.35085e-10	2.83002e-08	5.73235	5.80871	5.93852	8.67201	8.72187	8.6966
TLCD1	5.3591	2.42199	9.80921	7.39484	8.60203	20.2481	1.40024e-10	2.88542e-08	7.31101	7.27885	7.59466	9.79425	9.87296	9.76043
PIEZO1	4.62025	2.20797	9.81731	7.60399	8.71065	20.1143	1.51195e-10	3.01669e-08	7.5965	7.72555	7.48993	9.79632	9.81897	9.83663
TECR	6.81361	2.76842	9.09408	6.33319	7.71364	19.9892	1.62511e-10	3.10698e-08	6.15444	6.29863	6.54651	9.1089	9.12622	9.04713
CCNL1	10.6871	3.4178	9.24781	5.81354	7.53067	19.9826	1.63135e-10	3.10698e-08	6.06742	5.90034	5.47285	9.12218	9.40678	9.21448
AKAP9	16.0675	4.00608	10.8981	6.881	8.88957	19.9077	1.70375e-10	3.1223e-08	7.04102	6.74009	6.8619	11.2483	10.8907	10.5555
AC144449.1	10.3931	3.37756	8.65036	5.27048	6.96042	19.8858	1.72561e-10	3.1223e-08	5.53024	5.11319	5.168	8.66749	8.72187	8.56171
MUTYH	6.10369	2.60968	8.9334	6.31978	7.62659	19.8171	1.79604e-10	3.12666e-08	6.28874	6.39629	6.27431	8.88177	9.0147	8.90375
ST6GALNAC2	3.35653	1.74697	13.287	11.5456	12.4163	19.7984	1.8158e-10	3.12666e-08	11.5666	11.3566	11.7137	13.3092	13.383	13.1689
ST7L	6.35046	2.66686	10.5269	7.86473	9.19581	19.7673	1.84908e-10	3.14093e-08	7.9446	7.61719	8.0324	10.5648	10.6718	10.344
NCOA4	7.55422	2.91728	10.5658	7.64812	9.10694	19.666	1.96228e-10	3.20527e-08	7.64739	7.48036	7.8166	10.6961	10.7081	10.2931
TMEM245	17.4516	4.12529	8.8141	4.67707	6.74558	19.4058	2.28879e-10	3.66661e-08	4.54105	4.8008	4.68935	8.90885	8.96413	8.56933
PYCRL	21.6983	4.43951	8.94714	4.53543	6.74129	19.3944	2.30439e-10	3.66661e-08	4.25632	4.48283	4.86713	8.74251	8.93642	9.16251
TRIP13	6.94935	2.79688	8.86612	6.07909	7.47261	19.1151	2.72459e-10	4.22816e-08	6.00634	5.97249	6.25845	8.7807	8.99132	8.82633
C19orf44	3.11544	1.63944	11.3265	9.69331	10.5099	19.0019	2.91789e-10	4.47292e-08	9.64801	9.5985	9.83342	11.2945	11.3681	11.3168
C9orf116	14.1448	3.8222	8.64108	4.81186	6.72647	18.9417	3.02671e-10	4.58383e-08	4.81481	4.97951	4.64125	8.47387	8.59468	8.85468
C16orf93	4.2149	2.0755	9.73654	7.6664	8.70147	18.7521	3.3989e-10	4.97311e-08	7.64238	7.65276	7.70405	9.64581	9.72086	9.84294
GPSM1	13.5112	3.75609	9.23713	5.492	7.36457	18.7	3.50971e-10	4.97311e-08	5.53024	5.47292	5.47285	9.01945	9.12928	9.56266
MIR1539	5.09313	2.34855	9.73786	7.39643	8.56714	18.6455	3.62982e-10	5.01394e-08	7.4608	7.1787	7.54977	9.73928	9.82276	9.65153
APRT	8.74963	3.12922	9.45622	6.33077	7.89349	18.6174	3.69333e-10	5.04158e-08	6.15444	6.51701	6.32085	9.30217	9.34488	9.72162
SRRM2	4.11586	2.04119	9.9771	7.94241	8.95975	18.5842	3.77016e-10	5.04158e-08	7.93234	7.83022	8.06467	9.9002	10.0675	9.96355
ANAPC11	4.33123	2.11478	9.91105	7.80695	8.859	18.4736	4.03847e-10	5.34353e-08	7.74409	7.69175	7.98502	9.86113	9.87843	9.9936
AC006277.2	8.27358	3.04851	8.3573	5.32662	6.84196	18.3864	4.26467e-10	5.52648e-08	5.18921	5.21187	5.57879	8.33248	8.32231	8.41711
PODNL1	8.27466	3.0487	8.21482	5.16568	6.69025	18.2749	4.57414e-10	5.80777e-08	5.07487	5.18782	5.23434	8.22578	8.30616	8.11251
SNX32	2.54402	1.34711	12.8027	11.4575	12.1301	18.2194	4.73706e-10	5.93077e-08	11.5823	11.3176	11.4726	12.8137	12.8414	12.753
LDLRAD4	9.54126	3.25418	8.4596	5.21811	6.83885	18.1921	4.81933e-10	5.93077e-08	5.46365	4.89292	5.29777	8.52477	8.44538	8.40864
AC097461.4	9.97347	3.3181	8.39788	5.10624	6.75206	18.1393	4.98344e-10	5.93077e-08	5.13317	4.76874	5.41682	8.39946	8.41559	8.37858
AC002467.7	10.9095	3.44751	7.96075	4.51762	6.23918	18.138	4.98736e-10	5.93077e-08	4.66479	4.40153	4.48653	7.90309	7.98626	7.99289
BAG5	44.1687	5.46495	8.67337	3.16697	5.92017	18.1341	4.99977e-10	5.93077e-08	3.33294	3.50246	2.6655	8.59313	8.83501	8.59196
MTO1	17.7034	4.14595	7.85277	3.70791	5.78034	18.1188	5.04847e-10	5.93077e-08	3.76036	3.65056	3.7128	7.87982	7.86655	7.81194
HIST1H4I	7.62375	2.9305	8.64822	5.72027	7.18424	17.9539	5.60815e-10	6.43744e-08	5.55178	5.71086	5.89816	8.70769	8.76189	8.47508
AP001053.11	4.42123	2.14445	9.2183	7.07321	8.14576	17.904	5.79058e-10	6.55298e-08	7.13674	7.09067	6.99223	9.20565	9.14752	9.30173
AGER	5.84838	2.54804	9.36994	6.83922	8.10458	17.8695	5.9203e-10	6.55298e-08	6.69896	6.69815	7.12055	9.27864	9.33696	9.49423
IQCG	4.3562	2.12307	9.2085	7.08842	8.14846	17.8399	6.03445e-10	6.59592e-08	7.06368	7.03784	7.16375	9.1613	9.29665	9.16754
PSTK	7.67359	2.9399	8.84494	5.91058	7.37776	17.7207	6.51736e-10	6.85835e-08	5.73235	5.8399	6.15949	9.00519	8.86472	8.66493
TMPRSS9	3.6242	1.85766	10.4841	8.62856	9.55632	17.7113	6.55744e-10	6.85835e-08	8.54508	8.72868	8.61192	10.3516	10.5026	10.598
GBA2	4.17216	2.0608	9.92414	7.86685	8.8955	17.6933	6.6345e-10	6.85835e-08	7.86513	7.75039	7.98502	9.89053	10.0627	9.81916
MXD3	3.93326	1.97572	12.5857	10.6236	11.6046	17.6901	6.64819e-10	6.85835e-08	10.4519	10.4494	10.9696	12.554	12.6532	12.5498
ERP29	6.87007	2.78032	8.77746	5.99457	7.38602	17.6493	6.82671e-10	6.97657e-08	5.82369	6.10679	6.05323	8.94666	8.60792	8.77781
SPRTN	3.98734	1.99543	9.62762	7.63346	8.63054	17.6097	7.00525e-10	7.0099e-08	7.74409	7.52423	7.63205	9.59432	9.71067	9.57786
SOX6	5.54591	2.47142	8.61136	6.14627	7.37882	17.5889	7.10084e-10	7.02816e-08	6.05239	6.08091	6.3055	8.60737	8.67653	8.5502
NOXO1	4.98121	2.3165	9.5435	7.23732	8.39041	17.5428	7.31816e-10	7.18666e-08	7.14385	7.22078	7.34732	9.36217	9.56218	9.70614
BRE	28.6046	4.83818	8.85414	3.98567	6.41991	17.3864	8.10982e-10	7.79081e-08	3.42916	4.55979	3.96806	8.91649	8.98457	8.66137
PLA2G6	14.637	3.87155	7.95505	4.10031	6.02768	17.3847	8.1193e-10	7.79081e-08	4.02955	4.02093	4.25046	7.90309	7.84436	8.11772
STX1A	18.2289	4.18816	8.34336	4.179	6.26118	17.3704	8.19632e-10	7.80513e-08	4.20288	3.8476	4.48653	8.38851	8.5032	8.13836
AP003068.12	7.97139	2.99483	8.99714	5.99315	7.49515	17.1166	9.70274e-10	8.9679e-08	5.73235	6.19387	6.05323	9.01234	9.19799	8.78109
TRPM5	39.9093	5.31865	8.55116	3.24613	5.89864	17.061	1.00711e-09	9.24039e-08	2.99852	3.3374	3.40246	8.34386	8.52196	8.78764
GGA3	4.49451	2.16816	9.43749	7.28072	8.3591	16.9859	1.05935e-09	9.64929e-08	7.12242	7.2029	7.51683	9.37609	9.44415	9.49222
LEPRE1	48.0324	5.58594	8.0827	2.48367	5.28319	16.9449	1.08906e-09	9.78634e-08	2.1754	2.81657	2.45905	8.02123	8.14601	8.08086
RNASEH2C	2.68058	1.42254	11.6941	10.2807	10.9874	16.937	1.09492e-09	9.78634e-08	10.2787	10.1514	10.4119	11.638	11.6898	11.7544
ACADVL	3.30603	1.7251	11.13	9.4117	10.2709	16.9263	1.10284e-09	9.78634e-08	9.21895	9.45098	9.56516	11.0226	11.1748	11.1927
ZNF549	4.64005	2.21414	8.92681	6.71627	7.82154	16.8363	1.17227e-09	1.01624e-07	6.75573	6.57378	6.8193	9.023	8.91528	8.84215
ZNF747	4.91269	2.29651	8.47322	6.18369	7.32845	16.8136	1.19049e-09	1.02006e-07	6.12601	6.11956	6.3055	8.47904	8.44538	8.49523
CYB561D2	3.92188	1.97155	9.51077	7.54694	8.52885	16.6861	1.29885e-09	1.09365e-07	7.40865	7.50489	7.72727	9.45694	9.54164	9.53373
PLCB3	7.84004	2.97086	8.425	5.42675	6.92588	16.6646	1.31806e-09	1.09365e-07	5.36978	5.77682	5.13365	8.44774	8.47939	8.34789
AKT1S1	6.05256	2.59754	8.45126	5.85695	7.1541	16.6598	1.32247e-09	1.09365e-07	5.97481	5.76061	5.83542	8.30363	8.60792	8.44224
CDKN2C	4.33229	2.11513	9.51195	7.40325	8.4576	16.6024	1.37566e-09	1.1302e-07	7.36675	7.26742	7.57559	9.45694	9.65862	9.42028
IFNK	6.05933	2.59916	8.00069	5.39883	6.69976	16.5052	1.47119e-09	1.20083e-07	5.41748	5.39104	5.38796	8.09043	7.95897	7.95266
LINC00649	8.41134	3.07234	8.217	5.17347	6.69524	16.415	1.56627e-09	1.24607e-07	5.24315	4.83217	5.44511	8.10388	8.23969	8.30743
JOSD1	5.65535	2.49962	8.35843	5.87371	7.11607	16.397	1.58599e-09	1.25383e-07	5.76958	5.74422	6.10734	8.29778	8.39027	8.38724
WNT4	6.53301	2.70775	8.38113	5.69151	7.03632	16.3507	1.63799e-09	1.27885e-07	5.50838	5.56913	5.99701	8.42648	8.27883	8.43808
VPRBP	4.03563	2.01279	11.0809	9.07606	10.0785	16.3176	1.67636e-09	1.29275e-07	8.99558	8.8676	9.36501	11.139	11.1704	10.9332
PRCC	8.48416	3.08477	8.13301	5.0647	6.59885	16.3018	1.69508e-09	1.29922e-07	5.07487	4.95122	5.168	8.04931	7.993	8.35672
SMEK2	3.93873	1.97773	9.38771	7.41631	8.40201	16.2862	1.71361e-09	1.30546e-07	7.31731	7.31815	7.61348	9.43848	9.389	9.33565
VPS4A	3.01876	1.59396	11.31	9.7232	10.5166	16.2535	1.75339e-09	1.3205e-07	9.69836	9.58014	9.89111	11.246	11.4321	11.252
SUMF2	12.4359	3.63644	7.8389	4.21121	6.02506	16.141	1.89799e-09	1.4201e-07	4.54105	3.90772	4.18487	7.95597	7.73601	7.82474
CLDN19	133.502	7.06072	8.95351	1.91726	5.43539	16.1272	1.91672e-09	1.42563e-07	2.72289	1.10036	1.92853	9.08196	8.93642	8.84215
RNF123	2.75054	1.45971	10.6817	9.22495	9.95332	16.1181	1.92901e-09	1.42633e-07	9.15883	9.19614	9.3199	10.6383	10.7574	10.6493
DHPS	4.18792	2.06624	9.13609	7.06666	8.10138	16.0702	1.99569e-09	1.46701e-07	6.88859	7.19085	7.12055	9.23651	9.0763	9.09545
THRB	44.8749	5.48784	8.00201	2.49395	5.24798	15.9958	2.10411e-09	1.53771e-07	2.72289	2.54093	2.21804	8.0283	8.12775	7.85
FIZ1	3.66159	1.87247	9.49138	7.62357	8.55747	15.8507	2.33424e-09	1.69603e-07	7.66725	7.47043	7.73302	9.47775	9.58244	9.41394
LSMD1	3.92455	1.97253	10.2991	8.33197	9.31554	15.8271	2.37419e-09	1.71515e-07	8.26775	8.18327	8.54488	10.2838	10.4643	10.1492
AC009133.12	4.06536	2.02338	9.13926	7.10985	8.12455	15.7512	2.50783e-09	1.80134e-07	7.28553	7.07108	6.97293	9.13534	9.23259	9.04986
PTCD1	2.9998	1.58486	11.7412	10.166	10.9536	15.7268	2.5524e-09	1.82293e-07	10.1871	9.94181	10.3692	11.7167	11.8206	11.6863
TMED5	4.41526	2.1425	9.32429	7.17805	8.25117	15.6324	2.73349e-09	1.93034e-07	7.28553	7.05123	7.1974	9.48548	9.36061	9.12679
GSE1	2.97396	1.57238	10.5082	8.93105	9.71961	15.6153	2.76768e-09	1.94356e-07	8.84891	8.9995	8.94472	10.5216	10.6227	10.3802
GDF9	12.1427	3.60201	7.90186	4.34372	6.12279	15.5616	2.87839e-09	1.99897e-07	4.25632	3.90772	4.86713	7.94853	7.88841	7.86865
MAPK8IP1	5.37321	2.42579	7.99143	5.57586	6.78364	15.5436	2.91643e-09	2.01426e-07	5.61451	5.41195	5.70112	8.02123	7.96584	7.98722
SRP72	4.81653	2.26799	8.81406	6.55204	7.68305	15.4915	3.03e-09	2.08126e-07	6.77417	6.37516	6.5068	8.67201	8.89383	8.87635
SLC25A19	8.74083	3.12777	7.85037	4.70684	6.27861	15.4188	3.19626e-09	2.17173e-07	5.04482	4.7024	4.37332	7.75748	7.93116	7.86246
GART	6.49469	2.69926	8.06355	5.35793	6.71074	15.36	3.33809e-09	2.22009e-07	5.46365	5.28169	5.32846	8.18839	8.14601	7.85624
WIBG	6.59328	2.721	7.89954	5.1781	6.53882	15.3184	3.44263e-09	2.27757e-07	5.16146	5.1385	5.23434	7.88762	8.07153	7.73947
RNF213	3.93465	1.97624	9.6719	7.69453	8.68322	15.3074	3.47083e-09	2.2842e-07	7.69171	7.58072	7.81118	9.83716	9.70041	9.47812
CD97	7.60895	2.9277	8.19624	5.25232	6.72428	15.2647	3.58261e-09	2.34549e-07	5.57299	5.23552	4.94843	8.11721	8.38002	8.09149
PBX2	8.08537	3.01531	7.81075	4.81368	6.31222	15.1775	3.82323e-09	2.47721e-07	5.01412	4.55979	4.86713	7.67877	7.78344	7.97004
WDR24	4.95931	2.31014	9.07313	6.76897	7.92105	15.1552	3.88776e-09	2.50611e-07	6.87157	6.74009	6.69525	8.998	8.89022	9.33117
GLRX5	2.69783	1.4318	11.3789	9.95831	10.6686	15.0769	4.12285e-09	2.61907e-07	9.89018	9.85382	10.1309	11.3336	11.3085	11.4945
B3GALT2	6.76252	2.75756	9.38272	6.6354	8.00906	15.0761	4.1255e-09	2.61907e-07	6.71814	6.26455	6.92351	9.6273	9.37099	9.14985
IGFALS	5.36622	2.42391	8.28039	5.85916	7.06978	15.0294	4.27329e-09	2.69926e-07	5.76958	5.97249	5.83542	8.18206	8.17594	8.48317
ING1	9.41718	3.2353	7.94363	4.71273	6.32818	15.0196	4.30502e-09	2.70571e-07	4.3576	4.83217	4.94843	7.87982	8.15205	7.79903
NPLOC4	5.92875	2.56773	8.43434	5.88702	7.16068	14.9707	4.46688e-09	2.79347e-07	5.5939	5.80871	6.25845	8.41033	8.3697	8.52297
AP4S1	4.85309	2.2789	8.01657	5.7295	6.87304	14.9232	4.63081e-09	2.86745e-07	5.85867	5.77682	5.55302	8.00698	7.99971	8.04303
CIRBP	2.80888	1.48999	10.5929	9.10866	9.85078	14.8976	4.72155e-09	2.90931e-07	8.97978	9.07682	9.26937	10.5254	10.675	10.5783
PABPC1L	4.35947	2.12415	8.3832	6.26915	7.32618	14.7268	5.38024e-09	3.2573e-07	6.22315	6.13221	6.45209	8.32675	8.47939	8.34345
CSNK2B	8.99008	3.16833	7.3372	4.15688	5.74704	14.7231	5.39539e-09	3.2573e-07	4.20288	4.22374	4.04401	7.32388	7.45274	7.23499
MUS81	6.38232	2.67408	8.66911	5.99854	7.33383	14.6949	5.51402e-09	3.2694e-07	5.99066	6.10679	5.89816	8.36077	8.72187	8.9247
DENND4C	4.22232	2.07804	9.95433	7.88623	8.92028	14.6733	5.60642e-09	3.29464e-07	7.91998	7.58992	8.14878	9.97164	10.0834	9.80792
DGCR8	4.27093	2.09455	8.42138	6.32313	7.37226	14.6312	5.79142e-09	3.37029e-07	6.28874	6.37516	6.3055	8.34386	8.59024	8.33005
FICD	3.72719	1.89809	8.9554	7.05867	8.00703	14.5944	5.95895e-09	3.43596e-07	7.13674	6.91872	7.12055	9.09549	8.89742	8.87328
IGSF9	14.5097	3.85894	7.84862	3.99207	5.92035	14.5539	6.14886e-09	3.51324e-07	3.83251	4.17565	3.96806	7.57634	7.85179	8.11772
FAM120AOS	2.59963	1.3783	10.1451	8.76537	9.45525	14.5401	6.21517e-09	3.53505e-07	8.70258	8.81951	8.77402	10.1131	10.2118	10.1106
ADH5	39.0266	5.28639	8.21019	2.86663	5.53841	14.5094	6.36527e-09	3.58796e-07	2.56242	3.57841	2.45905	8.33248	8.32231	7.97579
DFNA5	3.46263	1.79187	9.94233	8.1455	9.04391	14.3945	6.96342e-09	3.80095e-07	8.08044	8.14006	8.21599	10.0256	10.0866	9.71476
HADHB	23.725	4.56834	7.90634	3.36668	5.63651	14.3906	6.98504e-09	3.80095e-07	3.90123	2.68532	3.5135	8.00698	7.993	7.71905
GLTPD1	8.247	3.04387	8.61396	5.56537	7.08967	14.3757	7.06706e-09	3.82901e-07	5.39382	5.88546	5.41682	8.34952	8.55878	8.93359
SLC7A7	4.86464	2.28233	8.84207	6.56857	7.70532	14.2845	7.5936e-09	4.03797e-07	6.19606	6.6373	6.87235	8.8301	8.87934	8.81676
NAALAD2	3.66715	1.87466	9.32209	7.4509	8.38649	14.2812	7.61335e-09	4.03797e-07	7.36675	7.37249	7.61348	9.2816	9.49965	9.18501
SSR4	4.33897	2.11735	9.0627	6.94863	8.00566	14.2686	7.68943e-09	4.06118e-07	6.64989	7.12906	7.06695	8.9203	9.13843	9.12937
PDZD4	18.7549	4.22919	7.11064	2.88705	4.99885	14.2343	7.90103e-09	4.09831e-07	2.99852	2.81657	2.84607	7.03182	7.07472	7.22537
CCDC85B	27.8486	4.79954	7.62063	2.77751	5.19907	14.2256	7.95535e-09	4.09831e-07	2.86728	3.2472	2.21804	7.45563	7.73601	7.67026
BHLHE40	10.3343	3.36937	7.34568	3.95608	5.65088	14.1836	8.22495e-09	4.16885e-07	4.02955	4.1259	3.7128	7.46608	7.17298	7.39798
IFT46	7.96214	2.99316	7.31607	4.32873	5.8224	14.1166	8.67613e-09	4.31168e-07	4.49733	4.17565	4.3132	7.20409	7.45274	7.29139
GON4L	5.87576	2.55477	8.41187	5.83307	7.12247	14.054	9.12159e-09	4.46381e-07	5.71337	6.18175	5.6041	8.394	8.59468	8.24693
ARRDC1	2.59258	1.37439	10.2247	8.85606	9.5404	14.0352	9.26043e-09	4.49435e-07	8.76383	8.82536	8.97899	10.1573	10.2671	10.2499
HAGH	5.10863	2.35294	7.65328	5.30367	6.47848	14.0174	9.39364e-09	4.52747e-07	5.16146	5.39104	5.35852	7.55691	7.67023	7.73269
MTRNR2L3	5.05012	2.33632	8.16148	5.8141	6.98779	14.0164	9.40071e-09	4.52747e-07	5.71337	5.91506	5.81389	8.33818	8.19945	7.94682
H3F3B	3.50277	1.8085	9.26322	7.45778	8.3605	13.9993	9.53126e-09	4.55543e-07	7.53836	7.31815	7.51683	9.18048	9.44415	9.16502
AC046143.3	3.10748	1.63575	9.59074	7.95798	8.77436	13.9147	1.02037e-08	4.81929e-07	7.91167	7.85716	8.10512	9.60382	9.70247	9.46592
AC018737.1	3.36732	1.7516	9.51619	7.76987	8.64303	13.906	1.02763e-08	4.81929e-07	7.94053	7.58533	7.78375	9.40083	9.64156	9.50619
THAP2	3.82137	1.93409	10.0177	8.08477	9.05124	13.9015	1.03134e-08	4.81929e-07	8.07301	7.91689	8.26442	10.093	10.1914	9.76873
PCYT2	5.68127	2.50621	7.37329	4.85983	6.11656	13.8758	1.05304e-08	4.86643e-07	4.95069	4.89292	4.73589	7.41304	7.30886	7.39798
PLCH2	3.46718	1.79376	9.31338	7.52323	8.41831	13.8029	1.11726e-08	5.08839e-07	7.28553	7.62168	7.66249	9.35375	9.20672	9.37967
ZC3H12A	13.4347	3.74789	7.07311	3.3175	5.19531	13.7512	1.16542e-08	5.26952e-07	3.33294	3.3374	3.28217	7.07344	7.21971	6.92619
NADK2	5.02593	2.32939	9.73836	7.40853	8.57344	13.7242	1.1914e-08	5.34854e-07	7.3968	7.2029	7.62589	9.98261	9.82276	9.4097
TXNL4B	12.6908	3.66571	7.53482	3.84116	5.68799	13.6961	1.21921e-08	5.41535e-07	3.83251	4.07437	3.61659	7.48677	7.79891	7.31879
SSU72	52.6347	5.71794	8.70172	2.88114	5.79143	13.5835	1.33753e-08	5.81757e-07	3.22985	3.8476	1.56596	8.72085	8.53588	8.84843
TSC22D2	8.97411	3.16577	7.08471	3.91818	5.50145	13.5784	1.34323e-08	5.8222e-07	3.90123	3.96543	3.88789	6.92977	7.21971	7.10466
EXTL2	5.43684	2.44277	7.72453	5.27821	6.50137	13.5709	1.35158e-08	5.83825e-07	5.01412	5.43256	5.38796	7.73172	7.83688	7.605
FUBP3	4.77639	2.25592	7.81645	5.55041	6.68343	13.5538	1.37078e-08	5.86077e-07	5.75109	5.51218	5.38796	7.8482	7.9028	7.69834
LONP1	2.9327	1.55223	9.54219	7.99255	8.76737	13.5303	1.39777e-08	5.93582e-07	7.87797	8.09552	8.00416	9.44642	9.51612	9.66404
SPEN	5.11695	2.35529	7.84237	5.46371	6.65304	13.4989	1.43472e-08	6.07221e-07	5.53024	5.65933	5.20155	7.94105	7.87388	7.71218
ATF5	3.38576	1.75948	8.85471	7.10048	7.97759	13.475	1.46346e-08	6.17306e-07	6.97082	7.08417	7.24645	8.75961	8.98457	8.81996
GNAT2	6.11431	2.61219	7.98054	5.37391	6.67722	13.4614	1.48015e-08	6.22256e-07	4.9179	5.55039	5.65343	7.97805	8.0523	7.91127
AC002398.11	3.20614	1.68084	9.08429	7.41442	8.24936	13.4073	1.5484e-08	6.48779e-07	7.3968	7.29019	7.55627	8.95411	9.12622	9.17255
HCCAT3	16.4094	4.03645	7.02025	3.02203	5.02114	13.3952	1.56414e-08	6.53199e-07	2.86728	2.68532	3.5135	7.08705	6.95553	7.01818
OSBPL2	9.29064	3.21578	7.1559	3.94732	5.55161	13.381	1.58292e-08	6.5885e-07	3.83251	3.96543	4.04401	7.25321	6.94165	7.27284
KLHL28	4.15369	2.05439	8.45294	6.41228	7.43261	13.3581	1.61358e-08	6.69398e-07	6.20967	6.33193	6.69525	8.34952	8.55878	8.45052
FGF22	54.2768	5.76226	8.39709	2.60945	5.50327	13.2841	1.71709e-08	7.07666e-07	2.56242	3.04789	2.21804	8.02123	8.52662	8.64342
AC004471.9	10.046	3.32856	7.10959	3.79838	5.45399	13.2735	1.73248e-08	7.11677e-07	4.08967	3.50246	3.803	6.95967	7.17298	7.19613
STK19	3.84521	1.94306	9.16972	7.22952	8.19962	13.2615	1.75015e-08	7.14267e-07	7.27262	7.02433	7.3916	9.2426	9.31829	8.94828
PPP1R10	10.1257	3.33995	7.47823	4.10077	5.7895	13.2472	1.77131e-08	7.15973e-07	4.20288	4.48283	3.61659	7.28898	7.60131	7.5444
AC137932.6	7.17983	2.84395	7.16068	4.32115	5.74092	13.2416	1.77982e-08	7.15973e-07	4.14739	4.44275	4.37332	7.01768	7.17298	7.29139
AC027601.1	2.60101	1.37907	10.8282	9.45849	10.1433	13.2396	1.78281e-08	7.15973e-07	9.3228	9.46356	9.58912	10.6838	10.8317	10.969
FSD2	2.24133	1.16436	10.6277	9.46833	10.048	13.2111	1.82633e-08	7.28791e-07	9.44435	9.38906	9.57159	10.5937	10.6644	10.6248
GYS1	6.01508	2.58858	8.05843	5.46306	6.76074	13.2023	1.83995e-08	7.31903e-07	5.16146	5.72763	5.50007	7.88762	8.30616	7.98151
AC018693.6	5.27994	2.40052	7.38522	4.96713	6.17618	13.1223	1.9693e-08	7.73565e-07	5.10432	5.06119	4.73589	7.4238	7.41307	7.31879
PIPOX	7.38636	2.88486	7.63213	4.76239	6.19726	13.1137	1.98375e-08	7.76815e-07	4.25632	4.86286	5.168	7.63311	7.70349	7.55979
SURF4	2.88209	1.52711	8.88022	7.35175	8.11598	13.0875	2.02857e-08	7.91387e-07	7.29195	7.39367	7.36963	8.85418	8.9538	8.83268
POU3F1	227.176	7.82767	6.34453	-1.49114	2.42669	13.0777	2.04573e-08	7.91387e-07	-1.52504	-1.70699	-1.24139	6.38576	6.48657	6.16124
PPM1M	4.05321	2.01906	7.88242	5.86768	6.87505	13.0696	2.05985e-08	7.94244e-07	5.99066	5.69389	5.91848	7.90309	7.94513	7.79903
SNX22	2.32296	1.21596	14.4196	13.2168	13.8182	13.0082	2.17114e-08	8.24509e-07	13.1829	12.9973	13.4702	14.4569	14.4795	14.3224
TBC1D10B	2.94476	1.55815	8.77737	7.21986	7.99861	12.9712	2.24123e-08	8.45356e-07	7.20628	7.19085	7.26243	8.74251	8.8757	8.7139
GSTO1	5.28886	2.40296	7.51707	5.11869	6.31788	12.9405	2.30136e-08	8.63526e-07	5.29514	4.89292	5.168	7.65155	7.51026	7.38939
SLC16A3	4.55585	2.18772	8.04589	5.84017	6.94303	12.9198	2.34285e-08	8.73877e-07	6.00634	6.01411	5.50007	7.95597	8.12775	8.05394
PRRC2A	5.17358	2.37116	7.74811	5.35796	6.55303	12.9141	2.35445e-08	8.75606e-07	5.16146	5.71086	5.20155	7.69664	7.82181	7.72589
ADAMTS1	6.53252	2.70764	7.97418	5.25385	6.61402	12.8497	2.48924e-08	9.20287e-07	5.32045	5.49268	4.94843	7.85617	7.7912	8.27517
PYCARD	15.7965	3.98154	7.05256	3.10588	5.07922	12.8302	2.53192e-08	9.33322e-07	3.11882	2.68532	3.5135	6.98896	7.24252	6.92619
ASPSCR1	10.6359	3.41088	7.26273	3.84693	5.55483	12.741	2.73636e-08	1.00573e-06	3.42916	4.22374	3.88789	7.16612	7.14903	7.47305
CCND3	4.25274	2.08839	7.87778	5.7856	6.83169	12.7252	2.77448e-08	1.01087e-06	5.65487	5.82439	5.87755	7.95597	7.993	7.68437
AC104532.3	5.98913	2.58235	8.01375	5.43201	6.72288	12.7065	2.82034e-08	1.02249e-06	5.76958	5.1385	5.38796	8.02123	8.23401	7.78601
C11orf49	2.68707	1.42603	10.51	9.09215	9.80108	12.6934	2.85281e-08	1.02249e-06	9.04577	8.90126	9.32941	10.5563	10.5445	10.4292
LRRTM2	3.37875	1.75649	8.51703	6.75426	7.63565	12.6918	2.85694e-08	1.02249e-06	6.94664	6.68102	6.63512	8.60737	8.52662	8.41711
AC005253.2	2.92011	1.54602	8.87171	7.33171	8.10171	12.6917	2.85712e-08	1.02249e-06	7.27262	7.23259	7.48993	8.87786	8.90459	8.83268
TCF7	2.80975	1.49044	9.96404	8.4765	9.22027	12.6746	2.90036e-08	1.03279e-06	8.38335	8.37914	8.667	10.015	10.0644	9.81275
PTGDR2	5.98056	2.58028	7.53091	4.96934	6.25013	12.6699	2.91234e-08	1.03413e-06	4.98276	4.86286	5.06239	7.26523	7.5746	7.75292
ERCC1	2.60524	1.38141	11.5242	10.1487	10.8364	12.583	3.14401e-08	1.10667e-06	10.1452	9.93641	10.3646	11.5887	11.612	11.3718
LPCAT3	2.1919	1.13218	10.9254	9.80008	10.3628	12.577	3.16066e-08	1.10667e-06	9.72822	9.7156	9.95644	10.8862	10.9688	10.9214
C11orf57	2.77481	1.47239	10.1517	8.69224	9.42197	12.5253	3.30887e-08	1.14584e-06	8.62089	8.50124	8.9546	10.1114	10.1618	10.1819
WRAP73	13.6946	3.77554	7.27235	3.47007	5.37121	12.5221	3.31811e-08	1.14584e-06	3.68441	3.71927	3.00654	6.98896	7.41307	7.415
INSIG1	29.4092	4.87819	7.35884	2.51225	4.93555	12.5034	3.37367e-08	1.15866e-06	3.11882	1.75244	2.6655	7.32388	7.55651	7.19613
TSSK2	3.72233	1.89621	8.69672	6.81238	7.75455	12.4585	3.5113e-08	1.18968e-06	6.57825	6.86665	6.99223	8.52477	8.68904	8.87635
ELP5	4.53315	2.18051	8.11109	5.92892	7.02001	12.4351	3.58543e-08	1.20184e-06	5.55178	6.18175	6.05323	8.04234	8.19945	8.09149
EIF3H	2.99829	1.58414	8.52225	6.9436	7.73293	12.3834	3.75506e-08	1.23829e-06	6.9946	6.79683	7.03938	8.54956	8.52196	8.49523
IDH3B	6.34038	2.66457	7.82104	5.17936	6.5002	12.3644	3.81975e-08	1.25037e-06	5.32045	4.95122	5.2664	7.47646	7.93816	8.0485
HMBS	3.50322	1.80868	8.11672	6.31536	7.21604	12.2929	4.07343e-08	1.32308e-06	6.16845	6.3537	6.42394	7.97073	8.17594	8.2035
IDNK	8.90034	3.15386	6.86111	3.69325	5.27718	12.2771	4.13157e-08	1.33838e-06	3.51936	3.8476	3.7128	6.98896	6.92765	6.66671
ABCA7	11.3296	3.50202	7.01995	3.52879	5.27437	12.2744	4.14185e-08	1.33838e-06	2.99852	3.78486	3.803	6.97439	6.89922	7.18625
MAP3K11	3.48408	1.80078	8.09483	6.30634	7.20058	12.2671	4.1692e-08	1.34377e-06	6.20967	6.22964	6.47971	7.97073	8.13995	8.1738
RELA	5.22115	2.38437	7.33621	4.9724	6.15431	12.2535	4.22079e-08	1.35442e-06	4.98276	4.8008	5.13365	7.12713	7.43304	7.44846
CFL1	2.47788	1.3091	9.43122	8.12052	8.77587	12.2489	4.23826e-08	1.3556e-06	8.05804	8.22522	8.07828	9.40627	9.39918	9.48821
CCDC57	3.55901	1.83148	8.66171	6.84236	7.75204	12.2393	4.27532e-08	1.36398e-06	6.87157	6.77279	6.88273	8.453	8.62538	8.90676
AC017002.1	13.0041	3.70089	7.37886	3.67877	5.52882	12.2303	4.31033e-08	1.37167e-06	3.90123	3.42229	3.7128	7.43449	7.66179	7.04029
PPP2R3A	3.7652	1.91273	8.86178	6.94343	7.9026	12.2075	4.40039e-08	1.39327e-06	6.79237	6.96189	7.07602	9.03709	8.96756	8.58069
RPRD1A	8.42871	3.07531	6.78543	3.69529	5.24036	12.1757	4.52911e-08	1.43043e-06	3.68441	3.78486	3.61659	6.81995	6.92765	6.6087
RPS19BP1	16.3336	4.02977	7.23279	3.21956	5.22617	12.1551	4.615e-08	1.45027e-06	3.96681	2.68532	3.00654	7.04583	7.29802	7.35452
PKD1	3.96415	1.98701	7.63158	5.6571	6.64434	12.1431	4.66574e-08	1.46255e-06	5.75109	5.47292	5.74729	7.63311	7.52894	7.73269
RPL12	3.79851	1.92543	7.85723	5.91862	6.88793	12.1383	4.68608e-08	1.46527e-06	5.84128	6.14476	5.76984	7.80767	7.95207	7.81194
SLC22A18	5.70535	2.51232	7.0798	4.58522	5.83251	12.1134	4.79362e-08	1.49148e-06	4.58349	4.48283	4.68935	6.97439	6.98288	7.28214
METTL12	2.37484	1.24783	10.54	9.3014	9.92069	12.058	5.0432e-08	1.5488e-06	9.15004	9.25663	9.49754	10.5091	10.4943	10.6165
MAP3K12	2.50834	1.32673	10.4595	9.13425	9.79688	12.0467	5.09583e-08	1.5585e-06	8.97978	9.10117	9.3218	10.5378	10.5202	10.3205
PBLD	3.89978	1.96339	8.06404	6.09738	7.08071	12.0302	5.1732e-08	1.57751e-06	5.89281	6.30981	6.08952	7.89537	8.20527	8.09149
FAM19A2	10.2076	3.35157	8.09747	4.74869	6.42308	12.0153	5.24449e-08	1.58089e-06	4.81481	4.48283	4.94843	8.40491	8.26776	7.61976
WDR74	4.56438	2.19042	7.86638	5.68076	6.77357	12.0018	5.3102e-08	1.59687e-06	5.90959	5.60589	5.52679	7.68773	7.79891	8.11251
GADD45B	43.4311	5.44066	6.81384	1.37176	4.0928	11.9942	5.34749e-08	1.60425e-06	1.93439	1.10036	1.08054	6.91458	6.64905	6.87789
TUBA4A	4.53136	2.17994	7.21329	5.04518	6.12923	11.9832	5.40191e-08	1.60905e-06	4.9179	4.95122	5.2664	7.22886	7.26498	7.14603
HNRNPH3	3.9405	1.97838	7.62263	5.65909	6.64086	11.9519	5.56045e-08	1.65032e-06	5.50838	5.55039	5.91848	7.66068	7.56558	7.64162
NRD1	3.04427	1.60609	8.03941	6.43263	7.23602	11.9157	5.74979e-08	1.69262e-06	6.44651	6.42743	6.42394	8.10388	7.96584	8.0485
SNX17	5.09145	2.34808	7.4456	5.12307	6.28433	11.8599	6.05506e-08	1.77417e-06	5.21643	4.73595	5.41682	7.4451	7.51963	7.37206
REC8	2.79538	1.48305	8.92589	7.45137	8.18863	11.8267	6.2452e-08	1.82139e-06	7.32983	7.36178	7.66249	8.94666	8.89742	8.93359
FNDC8	3.05968	1.61338	8.20545	6.59892	7.40218	11.8137	6.3218e-08	1.83099e-06	6.54642	6.5551	6.69525	8.08366	8.29529	8.23739
CEP68	3.14601	1.65352	9.02554	7.37548	8.20051	11.7897	6.46488e-08	1.86384e-06	7.31731	7.22078	7.58833	9.1613	9.0763	8.839
TAF10	2.1967	1.13534	12.7039	11.5795	12.1417	11.7609	6.64142e-08	1.906e-06	11.5061	11.3955	11.8369	12.6699	12.7896	12.6523
WNT2	123.122	6.94395	5.44466	-1.49114	1.97676	11.7582	6.65828e-08	1.90648e-06	-1.52504	-1.70699	-1.24139	5.41843	5.31426	5.60129
LAMA5	2.26196	1.17758	10.8193	9.65126	10.2353	11.6833	7.14334e-08	2.02159e-06	9.65051	9.5985	9.70478	10.6612	10.7984	10.9982
CREBZF	5.80197	2.53654	6.95266	4.39238	5.67252	11.6509	7.36536e-08	2.07584e-06	4.25632	4.73595	4.18487	6.97439	6.89922	6.98437
STPG1	3.83296	1.93846	8.25085	6.31305	7.28195	11.6369	7.46345e-08	2.08943e-06	6.23651	6.26455	6.43809	8.18839	8.52662	8.03755
TMEM241	5.6085	2.48761	7.83614	5.35493	6.59554	11.6269	7.53402e-08	2.1045e-06	5.53024	5.03447	5.50007	7.95597	8.03933	7.51313
GDI2	3.79386	1.92366	8.32092	6.38652	7.35372	11.6197	7.58572e-08	2.11425e-06	6.35148	6.42743	6.38066	8.62147	8.23401	8.10728
ZNF585A	8.93263	3.15909	7.0708	3.93209	5.50144	11.6088	7.66441e-08	2.12675e-06	3.83251	3.65056	4.3132	7.21653	7.21971	6.77616
ZCCHC14	3.44439	1.78425	7.86308	6.08478	6.97393	11.5884	7.8141e-08	2.15154e-06	6.08229	5.92963	6.24242	7.91839	7.93816	7.73269
C2	4.65428	2.21856	7.33272	5.1357	6.23421	11.5828	7.85526e-08	2.15591e-06	5.21643	4.89292	5.29777	7.14024	7.44292	7.415
FAM195A	3.28223	1.71468	7.71582	6.00991	6.86286	11.5602	8.02565e-08	2.1931e-06	5.92617	5.94406	6.15949	7.71428	7.68696	7.74621
ERBB3	7.22307	2.85261	7.22394	4.40491	5.81442	11.5569	8.05131e-08	2.19534e-06	4.49733	4.1259	4.5915	6.91458	7.27607	7.48115
MPRIP	3.07997	1.62292	8.04941	6.42404	7.23673	11.5265	8.2876e-08	2.24638e-06	6.32671	6.50733	6.43809	7.98534	8.17001	7.99289
SCNN1D	14.8706	3.89439	6.80887	2.94054	4.8747	11.5259	8.29212e-08	2.24638e-06	2.72289	2.81657	3.28217	6.95967	6.50555	6.96138
SPC24	2.96321	1.56716	9.14151	7.58337	8.36244	11.448	8.93318e-08	2.40587e-06	7.46648	7.44021	7.84342	9.2816	9.02131	9.12161
PSMC2	8.11122	3.01992	7.00642	3.95508	5.48075	11.4432	8.97452e-08	2.40587e-06	4.49733	3.96543	3.40246	7.07344	6.92765	7.01818
HMHA1	2.46954	1.30424	9.77897	8.4855	9.13223	11.4429	8.97657e-08	2.40587e-06	8.45081	8.38444	8.62125	9.6203	9.83031	9.88631
KCNT1	11.8194	3.56309	6.50798	2.95478	4.73138	11.4027	9.3304e-08	2.49009e-06	2.56242	3.15099	3.15093	6.42916	6.42808	6.66671
MTRR	3.16852	1.66381	8.43959	6.79039	7.61499	11.3902	9.44285e-08	2.51476e-06	6.87157	6.51701	6.98261	8.38851	8.45518	8.47508
IL12RB2	4.30584	2.10629	7.67454	5.58438	6.62946	11.3657	9.66814e-08	2.56389e-06	5.5939	5.28169	5.87755	7.77441	7.74402	7.5052
SRRD	2.32548	1.21753	9.90448	8.69024	9.29736	11.3553	9.76619e-08	2.58444e-06	8.75225	8.52782	8.79065	9.98261	9.9037	9.82713
AC073072.5	6.63993	2.73117	6.70336	3.97686	5.34011	11.3151	1.01525e-07	2.67541e-06	3.96681	3.8476	4.11616	6.91458	6.63187	6.56362
USP39	3.5281	1.81889	7.70214	5.87285	6.78749	11.2828	1.04759e-07	2.74672e-06	5.92617	5.90034	5.79203	7.74895	7.84436	7.51313
ADD1	5.23397	2.38791	6.84428	4.4438	5.64404	11.2751	1.05542e-07	2.74672e-06	4.62471	4.52183	4.18487	6.80355	6.77955	6.94974
NIT1	2.60417	1.38083	9.8346	8.46322	9.14891	11.2329	1.09963e-07	2.82089e-06	8.34378	8.35505	8.69082	9.71538	9.98372	9.8047
UBE2Z	5.19646	2.37753	7.25419	4.85878	6.05649	11.2234	1.1098e-07	2.83541e-06	4.58349	5.21187	4.78098	7.15324	7.43304	7.1763
LINC00691	39.3974	5.30003	6.50304	1.20995	3.8565	11.2014	1.13396e-07	2.8854e-06	1.93439	0.614935	1.08054	6.62846	6.42808	6.45258
LRRC24	2.40367	1.26524	9.70171	8.4464	9.07406	11.1767	1.16164e-07	2.94392e-06	8.34069	8.38972	8.60879	9.57755	9.73097	9.7966
TUSC5	90.498	6.49981	5.0082	-1.49114	1.75853	11.1691	1.17023e-07	2.95291e-06	-1.52504	-1.70699	-1.24139	5.02477	4.97609	5.02374
ATOX1	5.71961	2.51592	7.07255	4.57129	5.82192	11.1549	1.18661e-07	2.98314e-06	4.81481	4.3591	4.53997	6.80355	7.20817	7.20594
DAP3	3.95212	1.98263	7.99799	6.01925	7.00862	11.1521	1.18993e-07	2.98551e-06	5.82369	5.94406	6.28999	8.18206	8.0523	7.7596
AC022007.5	3.12081	1.64192	8.21345	6.58566	7.39955	11.1132	1.23625e-07	3.07792e-06	6.64989	6.34286	6.76423	8.13042	8.26776	8.24216
FAM217A	5.38989	2.43026	7.8985	5.45943	6.67896	11.1007	1.25147e-07	3.10275e-06	5.55178	5.32643	5.50007	8.12383	8.09052	7.48115
TMSB4X	8.41504	3.07297	6.48133	3.39091	4.93612	11.0958	1.25756e-07	3.11171e-06	3.68441	3.3374	3.15093	6.62846	6.44784	6.3677
AC004862.6	185.925	7.53858	6.58496	-0.962821	2.81107	11.0616	1.30063e-07	3.19939e-06	-1.52504	-1.70699	0.34357	6.60973	6.79506	6.3501
SHMT1	3.33345	1.73702	8.07741	6.35958	7.2185	11.0556	1.30832e-07	3.20958e-06	6.24975	6.16952	6.65947	8.02123	8.0523	8.15872
AC091153.4	5.81221	2.53909	7.82437	5.32357	6.57397	11.0313	1.34013e-07	3.27096e-06	5.34533	4.76874	5.85664	7.87198	7.94513	7.65601
ECI1	4.45024	2.15388	8.17714	6.05806	7.1176	10.9859	1.40174e-07	3.4147e-06	5.99066	5.67671	6.5068	8.08366	8.07789	8.36988
NXPE1	55.8578	5.80369	5.88555	0.0938211	2.98969	10.9761	1.41547e-07	3.43321e-06	0.059924	-0.122031	0.34357	5.79528	5.98963	5.87174
PRPF38B	7.65594	2.93658	9.72932	6.76307	8.24619	10.9714	1.42205e-07	3.43321e-06	7.47778	6.95478	5.85664	9.6203	9.6437	9.92396
HDAC10	5.64785	2.4977	6.91218	4.42083	5.6665	10.9676	1.4275e-07	3.43321e-06	4.08967	4.63286	4.53997	6.73604	6.92765	7.07284
GAREM	8.34798	3.06143	7.54022	4.47135	6.00579	10.9665	1.42899e-07	3.43321e-06	4.70378	4.22374	4.48653	7.87982	7.63618	7.10466
MOGS	4.70228	2.23336	6.72132	4.4955	5.60841	10.938	1.47008e-07	3.50253e-06	4.45224	4.44275	4.5915	6.62846	6.84062	6.69486
NKIRAS1	4.44477	2.15211	7.06277	4.92837	5.99557	10.9212	1.49492e-07	3.5455e-06	4.81481	4.73595	5.23434	7.11389	7.12468	6.94974
TRMT1L	12.9651	3.69656	6.34471	2.62593	4.48532	10.9067	1.51674e-07	3.59047e-06	3.11882	2.54093	2.21804	6.42916	6.3462	6.25876
PMPCA	28.4094	4.8283	7.5586	2.64647	5.10253	10.9048	1.51962e-07	3.59053e-06	2.72289	3.65056	1.56596	7.47646	7.36191	7.83742
RNF24	2.33281	1.22207	9.07682	7.85913	8.46798	10.9	1.52689e-07	3.60093e-06	7.79914	7.82244	7.95582	9.00877	9.14752	9.07418
NEK4	5.58373	2.48123	6.79568	4.28446	5.54007	10.8856	1.54906e-07	3.64638e-06	4.4057	4.55979	3.88789	6.73604	6.81041	6.84058
INVS	5.62198	2.49108	6.66515	4.17584	5.42049	10.8432	1.6162e-07	3.77615e-06	4.3576	4.1259	4.04401	6.47128	6.74801	6.77616
CHAC2	3.98846	1.99583	7.87843	5.9	6.88922	10.835	1.62954e-07	3.80025e-06	5.95878	5.53141	6.20982	7.9998	7.9028	7.73269
GJB7	14.7891	3.88646	6.57774	2.7143	4.64602	10.8129	1.66615e-07	3.85886e-06	2.1754	2.68532	3.28217	6.81995	6.42808	6.48519
BANK1	22.2402	4.4751	6.72087	2.28377	4.50232	10.8114	1.66863e-07	3.85886e-06	2.72289	1.46293	2.6655	6.92977	6.71577	6.51707
DNALI1	2.74557	1.45711	9.10768	7.65086	8.37927	10.8096	1.67159e-07	3.85886e-06	7.75341	7.46042	7.73875	9.21807	9.18921	8.91576
IPP	2.70584	1.43608	8.84244	7.41025	8.12634	10.7702	1.73928e-07	3.98229e-06	7.35454	7.30703	7.56918	8.80561	9.0147	8.70701
AC005606.14	2.50783	1.32644	9.54405	8.21908	8.88157	10.6892	1.88782e-07	4.24507e-06	8.06555	8.18023	8.41145	9.61091	9.63726	9.384
KCTD4	5.56197	2.4756	6.74696	4.25503	5.50099	10.6808	1.90408e-07	4.26636e-06	4.49733	4.22374	4.04401	6.95967	6.61449	6.66671
TRIM52	2.21807	1.1493	9.7862	8.63831	9.21226	10.6495	1.96551e-07	4.36827e-06	8.55578	8.57956	8.77959	9.85517	9.83407	9.66937
ELF2	5.99579	2.58395	6.54463	3.94187	5.24325	10.6126	2.04102e-07	4.48249e-06	4.14739	3.96543	3.7128	6.53225	6.69938	6.40225
CHID1	7.32869	2.87356	6.63768	3.77673	5.2072	10.6115	2.04333e-07	4.48249e-06	3.96681	3.65056	3.7128	6.59075	6.40804	6.91426
RFX7	3.04495	1.60642	10.0393	8.4338	9.23654	10.6093	2.04788e-07	4.48464e-06	8.48759	8.18023	8.63359	10.2418	10.1239	9.75208
NUDT21	5.57484	2.47893	6.625	4.13817	5.38158	10.589	2.09067e-07	4.54912e-06	4.45224	4.07437	3.88789	6.64696	6.50555	6.72247
MAPK12	13.4306	3.74746	6.25027	2.53613	4.3932	10.5879	2.0932e-07	4.54912e-06	2.38185	2.38047	2.84607	6.03884	6.25939	6.45258
CTC1	3.00315	1.58648	7.9541	6.37598	7.16504	10.5868	2.09542e-07	4.54912e-06	6.28874	6.24137	6.59781	8.04931	7.93816	7.87482
SPTBN2	5.06415	2.34032	8.19734	5.81602	7.00668	10.5711	2.12944e-07	4.60706e-06	5.89281	6.3537	5.20155	8.25019	8.10925	8.23259
AC073130.3	6.40639	2.67951	6.55056	3.88472	5.21764	10.5265	2.22911e-07	4.78155e-06	3.68441	3.78486	4.18487	6.55201	6.73198	6.3677
ZNF771	2.50321	1.32378	9.05575	7.73574	8.39575	10.4958	2.30069e-07	4.90995e-06	7.81704	7.58992	7.80027	8.96889	9.22401	8.97435
ZNRD1	2.5088	1.327	8.62577	7.30365	7.96471	10.4926	2.30838e-07	4.91791e-06	7.36675	7.19689	7.34732	8.50969	8.74602	8.62159
MARS	2.45967	1.29847	8.72847	7.43651	8.08249	10.4573	2.39392e-07	5.06593e-06	7.4551	7.27885	7.57559	8.72521	8.7776	8.68261
NARFL	2.63348	1.39697	8.96282	7.57395	8.26839	10.4394	2.43868e-07	5.13471e-06	7.60167	7.55745	7.56274	8.8301	8.85365	9.20472
PFDN6	3.07177	1.61907	8.27042	6.66057	7.4655	10.4228	2.48095e-07	5.21496e-06	6.45796	6.74833	6.77542	8.05624	8.31695	8.43808
CUL4A	3.45379	1.78818	7.62048	5.81138	6.71593	10.4195	2.48939e-07	5.22221e-06	5.97481	5.98649	5.47285	7.63311	7.65331	7.57502
JUNB	4.7598	2.2509	6.77935	4.50431	5.64183	10.4112	2.51089e-07	5.25155e-06	4.49733	4.7024	4.3132	6.97439	6.6828	6.68085
VPS51	8.00376	3.00068	6.89707	3.90895	5.40301	10.4063	2.52376e-07	5.26972e-06	3.68441	4.07437	3.96806	6.51221	6.98288	7.19613
TIPARP	9.0165	3.17257	6.31825	3.12542	4.72184	10.4011	2.53745e-07	5.27765e-06	2.72289	3.50246	3.15093	6.38576	6.38772	6.18128
SURF6	5.82957	2.54339	7.35751	4.77916	6.06834	10.4	2.54016e-07	5.27765e-06	5.32045	4.83217	4.18487	7.50716	7.21971	7.34567
FJX1	10.742	3.42519	6.00894	2.56893	4.28894	10.3974	2.54709e-07	5.28332e-06	2.56242	2.68532	2.45905	6.12052	5.96241	5.94389
GPS2	2.12825	1.08967	11.4643	10.3833	10.9238	10.3825	2.58687e-07	5.32193e-06	10.5333	10.1152	10.5013	11.4625	11.491	11.4394
RAD51	5.06112	2.33946	6.89316	4.5565	5.72483	10.375	2.60721e-07	5.35502e-06	4.4057	4.48283	4.78098	7.0597	6.99636	6.62342
CAND2	2.34826	1.23159	8.81896	7.59217	8.20557	10.3594	2.64969e-07	5.43338e-06	7.52209	7.56213	7.6923	8.72521	8.91173	8.81996
RTEL1	36.2971	5.18178	6.40895	1.20644	3.8077	10.3441	2.6923e-07	5.50032e-06	2.1754	1.10036	0.34357	6.45037	6.25939	6.51707
TFAP2A	2.93787	1.55477	8.33805	6.79295	7.5655	10.3402	2.70325e-07	5.50727e-06	6.82811	6.6373	6.91343	8.1435	8.54508	8.32555
MGRN1	9.16345	3.19589	6.24033	3.02227	4.6313	10.2545	2.95703e-07	5.91877e-06	2.72289	3.3374	3.00654	6.31812	6.3462	6.05666
FBXL16	5.11086	2.35357	7.58708	5.26749	6.42729	10.2219	3.06011e-07	6.08632e-06	5.21643	5.00725	5.57879	7.59551	7.24252	7.92321
PPP1R15A	26.9821	4.75393	7.67913	2.90634	5.29273	10.1979	3.1386e-07	6.19345e-06	3.68441	2.81657	2.21804	7.66068	7.25379	8.12291
SLC39A9	2.95769	1.56447	7.67869	6.12531	6.902	10.1333	3.36027e-07	6.56082e-06	6.05239	5.97249	6.35106	7.70549	7.70349	7.62708
TXNRD2	10.6813	3.41701	6.50106	3.03604	4.76855	10.133	3.36131e-07	6.56082e-06	2.99852	3.65056	2.45905	6.29485	6.61449	6.59383
CYR61	8.9243	3.15774	6.51859	3.39891	4.95875	10.1315	3.36666e-07	6.56107e-06	3.42916	3.15099	3.61659	6.19783	6.54279	6.81515
AC010761.13	3.59867	1.84746	7.62079	5.7887	6.70474	10.1282	3.37865e-07	6.57424e-06	5.63483	5.64173	6.08952	7.80767	7.41307	7.64162
DDC8	22.9204	4.51856	6.09293	1.58912	3.84102	10.1193	3.41073e-07	6.6264e-06	0.79689	1.75244	2.21804	6.17252	6.09366	6.0126
WHSC1	3.05107	1.60931	7.74125	6.11487	6.92806	10.0869	3.52997e-07	6.80038e-06	6.05239	6.3537	5.93852	7.78279	7.80659	7.63437
SEMA3B	2.51721	1.33182	8.22461	6.8952	7.55991	10.0862	3.53274e-07	6.80038e-06	6.74642	6.976	6.96318	8.16932	8.23401	8.2705
AC073641.2	2.75096	1.45994	8.29821	6.85019	7.5742	10.0468	3.6841e-07	7.05932e-06	6.81035	6.6373	7.1029	8.30363	8.34883	8.24216
OPA3	3.34592	1.7424	7.32796	5.58076	6.45436	10.0286	3.75655e-07	7.16537e-06	5.32045	5.79285	5.62897	7.30071	7.38259	7.30058
SURF1	2.43487	1.28384	8.94167	7.66743	8.30455	10.0223	3.78212e-07	7.18021e-06	7.62217	7.55275	7.82739	8.78905	9.07313	8.96282
CORO1A	3.19759	1.67699	7.2795	5.61682	6.44816	10.0116	3.82539e-07	7.24173e-06	5.53024	5.55039	5.76984	7.14024	7.30886	7.38939
LINC00676	67.5838	6.07861	4.6018	-1.49114	1.55533	9.99884	3.87821e-07	7.3307e-06	-1.52504	-1.70699	-1.24139	4.84419	4.53357	4.42764
FAM207A	22.2938	4.47857	6.43888	1.95212	4.1955	9.98993	3.91543e-07	7.35679e-06	1.93439	1.99345	1.92853	6.78697	6.09366	6.436
HCFC1R1	2.4105	1.26933	9.15623	7.8991	8.52767	9.9536	4.07123e-07	7.54283e-06	7.79011	7.83797	8.06922	9.07173	9.06355	9.33341
CITED2	13.2314	3.72589	5.84238	2.10128	3.97183	9.95287	4.07445e-07	7.54283e-06	2.1754	2.1999	1.92853	5.9817	5.7239	5.82155
PPOX	3.1583	1.65915	7.49906	5.85315	6.6761	9.93112	4.17099e-07	7.68758e-06	5.71337	5.79285	6.05323	7.5471	7.33032	7.61976
LINC00880	114.947	6.84483	5.36813	-1.49114	1.93849	9.91476	4.24518e-07	7.79006e-06	-1.52504	-1.70699	-1.24139	5.86013	4.97609	5.26816
AEBP1	3.16083	1.6603	7.37573	5.73374	6.55473	9.90796	4.27647e-07	7.83604e-06	5.73235	5.55039	5.91848	7.25321	7.39283	7.48115
ARMC5	2.10855	1.07625	9.07031	7.99515	8.53273	9.88817	4.36888e-07	7.99372e-06	7.94867	7.98126	8.05552	9.04408	9.1445	9.02235
C1orf132	7.55799	2.918	6.44436	3.4933	4.96883	9.85801	4.51389e-07	8.21737e-06	3.22985	3.8476	3.40246	6.66522	6.48657	6.18128
SLC27A5	2.45516	1.29582	8.47666	7.19177	7.83422	9.85732	4.51726e-07	8.21737e-06	7.12242	7.09067	7.36223	8.36636	8.51729	8.54634
SLC25A29	10.0895	3.33478	6.18107	2.87228	4.52668	9.84312	4.5874e-07	8.29692e-06	3.22985	2.38047	3.00654	6.34103	5.96241	6.23978
JPH3	2.97512	1.57295	7.97095	6.4039	7.18743	9.82965	4.65497e-07	8.38296e-06	6.15444	6.38576	6.6715	8.06315	7.99971	7.85
AC005387.2	6.02689	2.59141	6.73524	4.14642	5.44083	9.82015	4.70325e-07	8.45724e-06	3.60424	4.52183	4.3132	6.57151	6.73198	6.90224
TRIM23	2.92823	1.55003	7.33236	5.7856	6.55898	9.81391	4.73531e-07	8.47904e-06	5.65487	5.82439	5.87755	7.26523	7.41307	7.31879
CCDC83	263.777	8.04317	7.61923	-0.4345	3.59237	9.80579	4.77735e-07	8.54215e-06	-1.52504	-0.122031	0.34357	8.00698	7.64477	7.20594
TTC30B	4.87737	2.2861	6.78968	4.47681	5.63325	9.80147	4.79987e-07	8.56101e-06	4.25632	4.8008	4.37332	6.83616	6.96927	6.56362
AP2B1	3.542	1.82456	7.43052	5.59312	6.51182	9.79985	4.80833e-07	8.56101e-06	5.29514	5.85525	5.62897	7.52727	7.50083	7.26347
GRIN3B	2.34155	1.22747	9.3873	8.17125	8.77927	9.78114	4.90736e-07	8.6881e-06	8.08414	8.13378	8.29583	9.18681	9.41433	9.56075
USP43	2.84124	1.50652	7.31649	5.80775	6.56212	9.76531	4.99291e-07	8.81473e-06	5.89281	5.76061	5.76984	7.38025	7.28709	7.28214
MIEF1	5.00101	2.32222	6.67642	4.37377	5.52509	9.75662	5.04051e-07	8.88629e-06	4.3576	4.07437	4.68935	6.73604	6.84062	6.45258
RNPS1	5.41469	2.43688	6.50565	4.06258	5.28411	9.74123	5.12608e-07	9.0092e-06	4.02955	4.27029	3.88789	6.24716	6.56105	6.70873
PMEPA1	8.95044	3.16196	5.95991	2.77508	4.36749	9.73335	5.17047e-07	9.03933e-06	2.72289	2.93686	2.6655	6.09381	6.01635	5.76956
ROMO1	5.08761	2.34699	6.31638	3.95895	5.13766	9.69268	5.40635e-07	9.36057e-06	4.25632	3.90772	3.7128	6.24716	6.38772	6.31426
KIF9	3.36958	1.75257	7.25254	5.4882	6.37037	9.67576	5.50784e-07	9.51011e-06	5.5939	5.51218	5.35852	7.48677	7.07472	7.19613
FKRP	3.08572	1.62561	8.30591	6.69679	7.50135	9.67178	5.53203e-07	9.53876e-06	6.7833	6.3537	6.95336	8.20096	8.47939	8.23739
TMEM14E	2.81378	1.49251	8.29713	6.80833	7.55273	9.66318	5.58463e-07	9.61627e-06	6.66972	6.70663	7.04863	8.39946	8.40045	8.09149
CEP57	2.29142	1.19624	8.38449	7.18499	7.78474	9.65333	5.64559e-07	9.70794e-06	7.17887	7.1787	7.1974	8.44774	8.43056	8.27517
TRAF3	4.21151	2.07434	6.53	4.46624	5.49812	9.64295	5.71059e-07	9.79292e-06	4.58349	4.22374	4.5915	6.60973	6.56105	6.41923
CDH4	2.73586	1.452	7.63695	6.19365	6.9153	9.63003	5.79255e-07	9.90645e-06	6.22315	6.06779	6.28999	7.51725	7.75199	7.64162
ICAM3	2.72424	1.44586	8.49478	7.06374	7.77926	9.59237	6.03896e-07	1.02671e-05	6.9628	6.85143	7.37699	8.42648	8.59911	8.45875
AC011247.3	8.32685	3.05777	6.12309	3.09211	4.6076	9.5855	6.0851e-07	1.03202e-05	2.72289	2.93686	3.61659	6.31812	6.01635	6.0348
TESK2	2.27804	1.18779	9.7399	8.56143	9.15067	9.57859	6.13188e-07	1.03599e-05	8.51251	8.39498	8.77681	9.63427	9.9037	9.68173
KLF4	11.8877	3.5714	6.24027	2.60945	4.42486	9.5677	6.20642e-07	1.04577e-05	2.56242	3.3374	1.92853	6.29485	6.09366	6.33229
C8orf82	2.84145	1.50663	8.36684	6.86919	7.61801	9.53889	6.40835e-07	1.07261e-05	6.71814	6.976	6.91343	8.13698	8.33828	8.62525
HARS	2.00932	1.00671	9.23573	8.23056	8.73314	9.52448	6.51192e-07	1.08705e-05	8.16321	8.21336	8.31511	9.28751	9.21251	9.20717
HTRA2	2.59174	1.37392	9.1062	7.73363	8.41992	9.50047	6.68863e-07	1.11507e-05	7.48898	7.74628	7.96562	9.14187	9.258	8.91875
CDHR5	2.72499	1.44625	8.35333	6.91238	7.63285	9.49285	6.74582e-07	1.12175e-05	6.63987	7.05788	7.03938	8.33818	8.22258	8.49922
GALM	4.49779	2.16922	6.58091	4.41797	5.49944	9.47164	6.9076e-07	1.14528e-05	4.81481	4.1259	4.3132	6.60973	6.52429	6.6087
BCS1L	2.63779	1.39933	8.6918	7.29237	7.99209	9.46242	6.97927e-07	1.15433e-05	7.07115	7.29582	7.51015	8.83817	8.73801	8.49922
AC007365.3	7.64693	2.93488	6.21322	3.3175	4.76536	9.45822	7.01218e-07	1.15825e-05	3.51936	2.81657	3.61659	6.01055	6.42808	6.20105
SLC19A3	90.9246	6.5066	5.04921	-1.49114	1.77904	9.44535	7.11409e-07	1.17047e-05	-1.52504	-1.70699	-1.24139	5.46086	5.13081	4.55596
AC012360.4	14.4855	3.85654	6.55341	2.7261	4.63975	9.42515	7.27715e-07	1.19418e-05	3.76036	1.75244	2.6655	6.60973	6.61449	6.436
SLC35E2B	3.8126	1.93078	7.01002	5.05548	6.03275	9.36437	7.7926e-07	1.26445e-05	4.95069	5.39104	4.8247	7.15324	6.8256	7.05122
TXNDC9	6.94748	2.79649	6.57652	3.75543	5.16597	9.363	7.80463e-07	1.26445e-05	4.4057	3.57841	3.28217	6.53225	6.79506	6.40225
AC073342.12	2.24807	1.16869	9.74408	8.58402	9.16405	9.36175	7.81573e-07	1.26445e-05	8.77988	8.31121	8.66098	9.70438	9.77075	9.7571
NOP14	2.42668	1.27898	8.44791	7.16268	7.8053	9.35967	7.83406e-07	1.26573e-05	7.07115	7.26167	7.15521	8.41574	8.62971	8.29829
WDR6	2.07398	1.0524	9.15981	8.11382	8.63681	9.35103	7.91087e-07	1.27578e-05	8.08414	8.04956	8.20776	9.04059	9.24393	9.1949
SPCS1	2.7765	1.47327	7.28857	5.81678	6.55268	9.3504	7.91654e-07	1.27578e-05	5.94257	5.69389	5.81389	7.34669	7.26498	7.25404
MIR3150B	7.41312	2.89008	6.21158	3.32754	4.76956	9.34319	7.98133e-07	1.28458e-05	3.11882	3.2472	3.61659	6.24716	6.46734	5.92024
AMOTL2	6.2788	2.65049	6.09114	3.40685	4.749	9.33147	8.08784e-07	1.29652e-05	3.42916	3.78486	3.00654	6.03884	6.09366	6.14092
NDUFAF3	2.83496	1.50333	7.9777	6.48407	7.23088	9.33049	8.09681e-07	1.29652e-05	6.3637	6.5551	6.53339	7.74036	7.97949	8.21326
ARHGAP30	2.71956	1.44337	8.08599	6.65081	7.3684	9.29589	8.42073e-07	1.33488e-05	6.43496	6.69815	6.8193	7.89537	8.23969	8.12291
ITGB1	3.51232	1.81242	7.74432	5.90182	6.82307	9.27022	8.67004e-07	1.36741e-05	6.11159	6.2059	5.38796	7.75748	7.73601	7.73947
ARF4	3.89903	1.96311	7.5055	5.56431	6.53491	9.26284	8.74308e-07	1.37605e-05	5.55178	5.16337	5.97778	7.70549	7.51963	7.29139
C3orf65	12.4875	3.64241	5.63698	1.96028	3.79863	9.23912	8.98272e-07	1.4009e-05	1.93439	2.38047	1.56596	5.69219	5.58802	5.63073
DUS1L	2.49264	1.31768	8.69556	7.38695	8.04125	9.18038	9.60677e-07	1.4835e-05	7.23983	7.46543	7.45558	8.52477	8.62538	8.93654
IER2	4.72346	2.23984	6.49848	4.25428	5.37638	9.14607	9.9927e-07	1.53513e-05	3.96681	4.48283	4.3132	6.29485	6.74801	6.45258
FAM78B	83.2352	6.37912	5.66289	-0.717165	2.47286	9.14267	1.00318e-06	1.53593e-05	-1.52504	-1.70699	1.08054	5.69219	5.78733	5.50917
DOCK7	5.39163	2.43072	7.24706	4.82601	6.03654	9.13724	1.00947e-06	1.54181e-05	5.01412	4.40153	5.06239	7.63311	7.24252	6.86556
VMP1	3.07711	1.62158	6.96127	5.33806	6.14966	9.13397	1.01328e-06	1.54406e-05	5.48619	5.32643	5.20155	6.9448	6.8555	7.08352
MTCP1	5.56276	2.4758	6.15633	3.68259	4.91946	9.1098	1.04188e-06	1.57793e-05	3.83251	3.50246	3.7128	6.09381	6.40804	5.96716
AC015987.1	4.04963	2.01779	6.30745	4.28595	5.2967	9.10658	1.04575e-06	1.58184e-05	4.49733	4.17565	4.18487	6.29485	6.38772	6.23978
WDR73	2.30391	1.20408	8.56181	7.36471	7.96326	9.1002	1.05349e-06	1.58972e-05	7.35454	7.2029	7.53668	8.52976	8.67653	8.47913
ZCCHC11	2.62046	1.38982	7.39787	6.01269	6.70528	9.07399	1.08587e-06	1.63076e-05	6.12601	5.91506	5.99701	7.30071	7.45274	7.44016
PARP8	8.72991	3.12597	5.79614	2.69794	4.24704	9.05322	1.1123e-06	1.66448e-05	2.56242	2.38047	3.15093	5.79528	5.96241	5.63073
PAM	3.68798	1.88283	6.83541	4.92717	5.88129	9.04901	1.11774e-06	1.67063e-05	4.74175	5.25879	4.78098	6.88372	6.94165	6.68085
MMP24	2.01655	1.01189	9.03398	8.02739	8.53069	9.04364	1.12472e-06	1.67708e-05	8.05804	7.94585	8.07828	8.93166	9.10148	9.06881
MTAP	17.2846	4.11142	6.42761	2.23777	4.33269	9.0296	1.1432e-06	1.69457e-05	1.64489	3.50246	1.56596	6.53225	6.28159	6.46898
MBNL1	3.20214	1.67904	7.1853	5.51391	6.34961	9.02825	1.14498e-06	1.69522e-05	5.75109	5.21187	5.57879	7.22886	7.26498	7.06207
FAM120A	4.40574	2.13938	6.98097	4.79941	5.89019	9.02317	1.15177e-06	1.70126e-05	5.07487	5.1385	4.18487	7.00339	6.89922	7.04029
BBC3	7.18091	2.84417	6.2891	3.38343	4.83627	9.01768	1.15913e-06	1.70812e-05	3.51936	3.96543	2.6655	6.22271	6.36711	6.2775
AHRR	4.78972	2.25994	6.12349	3.87247	4.99798	9.0045	1.17703e-06	1.73044e-05	4.02955	3.78486	3.803	6.06659	5.98963	6.31426
AP000254.8	2.63959	1.40031	7.90373	6.51032	7.20702	8.99307	1.1928e-06	1.74582e-05	6.44651	6.34286	6.7416	8.04931	7.89563	7.76624
NUP62	3.20016	1.67814	7.0645	5.40027	6.23238	8.99189	1.19443e-06	1.74582e-05	5.48619	5.18782	5.52679	6.89923	7.26498	7.02928
AJUBA	3.92517	1.97275	6.23661	4.26442	5.25052	8.98107	1.20959e-06	1.76183e-05	4.25632	4.22374	4.3132	6.22271	6.3462	6.14092
PLEK2	5.86293	2.55162	6.43937	3.86441	5.15189	8.97431	1.21917e-06	1.772e-05	3.68441	4.02093	3.88789	6.64696	6.61449	6.05666
MAP3K19	30.5834	4.93468	5.65062	0.718644	3.18463	8.97415	1.2194e-06	1.772e-05	1.93439	-0.122031	0.34357	5.72738	5.62321	5.60129
IRF7	2.32438	1.21685	7.98021	6.76465	7.37243	8.93923	1.27017e-06	1.83517e-05	6.62978	6.86665	6.79753	7.94853	7.93816	8.05394
HOOK2	2.14754	1.10269	9.57176	8.46486	9.01831	8.9327	1.2799e-06	1.845e-05	8.31888	8.53737	8.53833	9.56787	9.75695	9.39047
AP000697.6	13.0396	3.70483	6.34121	2.6008	4.47101	8.92994	1.28405e-06	1.84886e-05	2.72289	3.15099	1.92853	6.12052	6.16703	6.73608
AC007050.17	5.37436	2.42609	6.00675	3.60985	4.8083	8.91564	1.30575e-06	1.87366e-05	3.60424	3.42229	3.803	5.9222	5.87752	6.22054
WDR62	3.59462	1.84584	6.51829	4.66114	5.58972	8.90178	1.32714e-06	1.90002e-05	4.85	4.7024	4.43103	6.40762	6.61449	6.53275
UNKL	2.13619	1.09504	9.05069	7.96397	8.50733	8.89677	1.33498e-06	1.90907e-05	8.03529	7.78285	8.07376	8.94293	9.15656	9.05258
AC002456.2	11.7595	3.55575	6.19831	2.65832	4.42831	8.84442	1.41981e-06	2.01206e-05	1.64489	3.04789	3.28217	6.06659	6.40804	6.12031
ZNF629	3.17429	1.66643	7.67384	5.98644	6.83014	8.83626	1.43354e-06	2.02695e-05	5.90959	6.39629	5.65343	7.55691	7.71169	7.75292
KLHL25	16.9328	4.08175	5.79603	1.68273	3.73938	8.8335	1.43821e-06	2.02968e-05	1.28232	2.1999	1.56596	6.12052	5.55195	5.71562
SLC12A7	12.2909	3.61951	5.94106	2.26309	4.10207	8.8243	1.45393e-06	2.04886e-05	2.1754	3.04789	1.56596	6.01055	5.75596	6.05666
SOD2	2.45525	1.29587	9.0966	7.80359	8.4501	8.80267	1.49161e-06	2.09165e-05	7.72051	7.64395	8.04632	9.20565	9.23259	8.85156
ST5	2.18948	1.13059	8.65475	7.52573	8.09024	8.8021	1.49261e-06	2.09165e-05	7.40865	7.52423	7.6443	8.59789	8.81232	8.55404
CCDC103	3.84256	1.94207	6.42326	4.46231	5.44279	8.77988	1.53242e-06	2.14028e-05	4.4057	4.66805	4.3132	6.34103	6.61449	6.31426
USP44	4.29459	2.10252	6.88718	4.75888	5.82303	8.76827	1.55368e-06	2.16516e-05	4.88435	4.8008	4.5915	7.28898	6.76387	6.6087
SELO	2.81376	1.4925	7.06255	5.55858	6.31057	8.74441	1.59838e-06	2.21517e-05	5.5939	5.69389	5.38796	6.97439	7.17298	7.04029
SGK1	3.01894	1.59404	7.49133	5.88037	6.68585	8.72689	1.63206e-06	2.25936e-05	5.89281	6.16952	5.57879	7.52727	7.31963	7.62708
PIGX	6.9463	2.79624	6.05076	3.30583	4.67829	8.72164	1.64229e-06	2.26853e-05	3.51936	2.68532	3.7128	5.86013	6.21395	6.07819
MVD	13.1103	3.71263	5.63575	1.95212	3.79393	8.67067	1.74541e-06	2.37549e-05	1.64489	1.99345	2.21804	5.50209	5.43799	5.96716
RABL3	3.547	1.8266	6.4383	4.62194	5.53012	8.66394	1.75954e-06	2.3895e-05	4.74175	4.48283	4.64125	6.49189	6.25939	6.56362
RPL30	2.89516	1.53364	7.52749	5.98967	6.75858	8.66358	1.76028e-06	2.3895e-05	6.05239	5.95834	5.95828	7.80767	7.25379	7.52101
METTL16	4.48441	2.16492	5.98042	3.81033	4.89538	8.65257	1.78367e-06	2.41603e-05	4.02955	3.78486	3.61659	5.9222	5.96241	6.05666
NMT2	2.25339	1.1721	9.13803	7.97731	8.55767	8.64072	1.8092e-06	2.44797e-05	8.0618	7.68318	8.18697	9.14187	9.17149	9.10072
IQCK	3.64857	1.86733	6.69114	4.85311	5.77213	8.63793	1.81528e-06	2.45355e-05	4.66479	4.59679	5.29777	6.73604	6.69938	6.638
TMEM184B	6.66694	2.73703	5.57223	2.85305	4.21264	8.61158	1.87368e-06	2.52427e-05	2.86728	2.68532	3.00654	5.61913	5.43799	5.65958
C2orf83	18.7923	4.23207	5.94344	1.73477	3.8391	8.61072	1.87563e-06	2.52427e-05	1.28232	1.46293	2.45905	6.36357	5.7239	5.74284
CXorf36	40.8559	5.35247	3.84602	-1.49114	1.17744	8.6031	1.89291e-06	2.54208e-05	-1.52504	-1.70699	-1.24139	3.60027	3.89202	4.04577
KLHL21	7.49565	2.90605	5.70101	2.75482	4.22791	8.59916	1.90193e-06	2.55146e-05	2.99852	3.04789	2.21804	5.65612	5.78733	5.65958
PTDSS2	5.91439	2.56423	5.79458	3.25307	4.52382	8.58441	1.93605e-06	2.5917e-05	2.99852	3.2472	3.5135	5.58116	5.90638	5.89619
CUL7	2.84193	1.50687	7.44663	5.94889	6.69776	8.56169	1.98989e-06	2.64687e-05	5.94257	5.71086	6.19324	7.55691	7.52894	7.25404
TAF1C	3.56602	1.83431	6.42339	4.56681	5.4951	8.54775	2.02372e-06	2.68052e-05	4.62471	4.7024	4.37332	6.45037	6.56105	6.25876
NDUFC1	9.1314	3.19084	6.20306	2.95636	4.57971	8.51524	2.10502e-06	2.76779e-05	2.56242	3.8476	2.45905	5.9817	6.38772	6.23978
NPAS1	2.66261	1.41284	7.03223	5.62273	6.32748	8.4948	2.15793e-06	2.82848e-05	5.55178	5.56913	5.74729	7.04583	7.12468	6.92619
ACADS	34.7652	5.11957	4.98012	-0.188845	2.39564	8.48774	2.17654e-06	2.84398e-05	0.059924	0.614935	-1.24139	5.08026	4.97609	4.88402
GLDC	32.2067	5.00929	5.81563	0.867797	3.34172	8.48393	2.18666e-06	2.85424e-05	0.79689	-0.122031	1.92853	5.95225	5.43799	6.05666
ZNF428	4.24527	2.08586	6.11294	4.05995	5.08645	8.4789	2.20007e-06	2.86803e-05	3.90123	3.8476	4.43103	6.01055	6.16703	6.16124
RBM15	3.07183	1.6191	6.82156	5.21059	6.01607	8.47826	2.20179e-06	2.86803e-05	5.46365	5.03447	5.13365	6.70107	6.8256	6.93801
AC010525.4	5.06413	2.34031	6.0613	3.75743	4.90936	8.44393	2.29591e-06	2.96177e-05	3.96681	3.3374	3.96806	6.06659	5.87752	6.23978
ARHGAP39	4.57601	2.19409	5.93251	3.75743	4.84497	8.43606	2.31807e-06	2.98241e-05	3.96681	3.50246	3.803	5.79528	5.98963	6.0126
TNFSF13	3.48802	1.80241	6.75592	4.97147	5.86369	8.43519	2.32054e-06	2.98253e-05	4.85	4.73595	5.32846	6.95967	6.69938	6.6087
CLPTM1L	8.59287	3.10314	6.67249	3.48105	5.07677	8.43325	2.32604e-06	2.98655e-05	3.76036	4.22374	2.45905	6.91458	6.40804	6.69486
CNOT3	2.20092	1.13811	8.27867	7.14561	7.71214	8.40764	2.40008e-06	3.06285e-05	7.29195	7.02433	7.12055	8.13698	8.36451	8.33453
SCAND1	2.72277	1.44507	7.0423	5.5902	6.31625	8.39472	2.43841e-06	3.10545e-05	5.44075	5.77682	5.55302	6.95967	7.14903	7.01818
TMCO6	2.33141	1.2212	7.7401	6.5225	7.1313	8.38945	2.45422e-06	3.12242e-05	6.48059	6.42743	6.65947	7.87982	7.67023	7.67026
TULP2	6.162	2.6234	5.95365	3.36455	4.6591	8.37453	2.49958e-06	3.17372e-05	3.22985	3.2472	3.61659	5.58116	6.11853	6.16124
DCPS	2.63271	1.39655	7.28739	5.8759	6.58165	8.37115	2.50997e-06	3.18047e-05	5.75109	6.10679	5.76984	7.39126	7.26498	7.20594
WDR18	6.50079	2.70062	5.84873	3.17232	4.51052	8.36938	2.51543e-06	3.18419e-05	3.42916	2.93686	3.15093	5.76173	5.62321	6.16124
GNAT3	47.8956	5.58182	4.63227	-0.962821	1.83472	8.35109	2.57267e-06	3.23384e-05	0.059924	-1.70699	-1.24139	4.56179	4.97609	4.35893
CENPL	3.4326	1.7793	6.68845	4.88709	5.78777	8.31045	2.70489e-06	3.36638e-05	4.62471	5.21187	4.8247	6.75322	6.79506	6.51707
SIRT7	13.509	3.75585	6.02531	2.21105	4.11818	8.30518	2.72255e-06	3.38501e-05	2.86728	2.68532	1.08054	5.76173	6.09366	6.22054
NFKBIA	5.70221	2.51152	6.48829	3.96154	5.22492	8.29291	2.7642e-06	3.42663e-05	4.14739	4.22374	3.5135	6.24716	6.30345	6.91426
ZNF672	3.09482	1.62986	6.99271	5.3491	6.17091	8.25959	2.88069e-06	3.54727e-05	5.44075	5.47292	5.13365	6.78697	7.26498	6.92619
SERP1	2.39674	1.26107	8.74536	7.48536	8.11536	8.22818	2.99537e-06	3.65907e-05	7.62217	7.2267	7.60723	8.90501	8.81992	8.51115
IL17RC	2.9305	1.55115	6.47647	4.91662	5.69655	8.22692	3.00004e-06	3.66122e-05	4.9179	5.00725	4.8247	6.47128	6.50555	6.45258
ARHGAP31	3.71649	1.89394	6.29066	4.40108	5.34587	8.22374	3.01195e-06	3.67218e-05	4.20288	4.3591	4.64125	6.38576	6.40804	6.07819
GTPBP8	2.94551	1.55852	7.362	5.82327	6.59264	8.19451	3.1237e-06	3.77184e-05	5.90959	5.45288	6.10734	7.31234	7.51963	7.25404
DERL2	2.94953	1.56048	7.30308	5.73397	6.51853	8.19079	3.13826e-06	3.78217e-05	5.69413	5.69389	5.81389	7.46608	7.48179	6.96138
TRUB2	2.2055	1.14111	8.56716	7.42614	7.99665	8.18818	3.14848e-06	3.78359e-05	7.40865	7.30703	7.56274	8.63543	8.71373	8.35231
GCFC2	2.19878	1.1367	8.93992	7.79701	8.36846	8.17471	3.20193e-06	3.83316e-05	7.91998	7.73802	7.73302	8.90885	9.18333	8.72759
ADAP1	6.30466	2.65642	5.39191	2.75143	4.07167	8.16854	3.22674e-06	3.84821e-05	2.86728	2.54093	2.84607	5.37471	5.35669	5.44432
FNTA	5.08166	2.3453	5.68461	3.36455	4.52458	8.16551	3.23898e-06	3.85915e-05	3.42916	3.15099	3.5135	5.50209	5.75596	5.79579
ITGAE	2.12484	1.08735	8.62654	7.53319	8.07986	8.12598	3.40352e-06	4.00959e-05	7.77188	7.48036	7.34732	8.63079	8.66813	8.58069
PRDX2	7.53446	2.9135	5.84637	2.8993	4.37284	8.12351	3.4141e-06	4.01828e-05	2.38185	3.65056	2.6655	5.76173	5.78733	5.99006
MED9	17.4771	4.1274	6.57467	2.35508	4.46488	8.11404	3.45496e-06	4.0512e-05	2.56242	3.42229	1.08054	6.17252	6.88479	6.66671
GVQW1	2.61592	1.38732	8.0787	6.69985	7.38928	8.0992	3.52005e-06	4.116e-05	6.63987	6.45791	7.00178	8.30363	8.03933	7.89316
FBXL2	2.32005	1.21415	8.53094	7.32365	7.92729	8.0971	3.52939e-06	4.12309e-05	7.27262	7.12273	7.57559	8.56423	8.68071	8.34789
ITPRIPL2	4.16462	2.05818	5.90855	3.856	4.88227	8.09301	3.54757e-06	4.13664e-05	4.02955	3.65056	3.88789	6.06659	5.78733	5.87174
LEKR1	5.28467	2.40181	6.50718	4.09915	5.30317	8.08843	3.56812e-06	4.15184e-05	4.62471	3.78486	3.88789	6.36357	6.89922	6.25876
NKIRAS2	3.4354	1.78048	8.26697	6.49338	7.38018	8.08578	3.58005e-06	4.15908e-05	6.5887	6.09391	6.79753	8.46348	8.49372	7.84372
NRDE2	5.25409	2.39344	5.85764	3.48968	4.67366	8.05437	3.7248e-06	4.28369e-05	2.99852	3.50246	3.96806	5.76173	5.98963	5.82155
PUS10	2.2108	1.14457	7.85336	6.71489	7.28412	8.0364	3.81042e-06	4.35032e-05	6.66972	6.59221	6.88273	7.96337	7.7912	7.8055
AC009403.2	7.99647	2.99936	5.73137	2.69841	4.21489	8.02589	3.86146e-06	4.39263e-05	2.38185	3.04789	2.6655	5.82807	5.98963	5.37641
DEF8	3.42818	1.77744	6.58337	4.79903	5.6912	8.01227	3.92873e-06	4.45396e-05	4.81481	4.89292	4.68935	6.31812	6.89922	6.53275
SWI5	6.28092	2.65098	6.40047	3.76831	5.08439	8.0121	3.92955e-06	4.45396e-05	4.08967	3.2472	3.96806	6.34103	6.8256	6.0348
HSP90B1	3.0183	1.59374	9.26638	7.64448	8.45543	7.96129	4.19172e-06	4.70866e-05	8.03147	7.85334	7.04863	9.32245	9.38388	9.09281
SPHK2	2.35984	1.23869	8.32186	7.09102	7.70644	7.94987	4.25323e-06	4.76074e-05	7.09335	6.93325	7.24645	8.1435	8.59911	8.22296
NIPAL1	2.86394	1.518	6.49377	4.96286	5.72831	7.9457	4.27593e-06	4.78189e-05	4.95069	5.11319	4.8247	6.55201	6.42808	6.50122
AC003988.1	59.7406	5.90064	5.18539	-0.717165	2.23411	7.94142	4.29934e-06	4.80379e-05	-1.52504	-1.70699	1.08054	5.54216	4.86288	5.15112
SRSF12	7.08227	2.82421	5.81308	2.96014	4.38661	7.93752	4.32078e-06	4.81919e-05	2.72289	3.15099	3.00654	6.09381	5.93467	5.41076
CCM2	9.99253	3.32085	5.53309	2.26309	3.89809	7.93259	4.34809e-06	4.84106e-05	2.86728	1.46293	2.45905	5.41843	5.43799	5.74284
TMEM139	2.82471	1.4981	6.48869	5.00311	5.7459	7.87268	4.69484e-06	5.14021e-05	4.98276	4.89292	5.13365	6.38576	6.57908	6.50122
BRIX1	2.21466	1.14708	7.75392	6.5997	7.17681	7.84722	4.85107e-06	5.27948e-05	6.80139	6.57378	6.42394	7.78279	7.75992	7.71905
CDK6	7.75712	2.95552	6.73028	3.66438	5.19733	7.83708	4.91487e-06	5.34428e-05	3.90123	4.63286	2.45905	6.80355	6.76387	6.62342
SOX4	3.50441	1.80917	6.19491	4.37484	5.28488	7.81404	5.06304e-06	5.4599e-05	4.54105	4.27029	4.3132	6.42916	6.14298	6.0126
NOM1	3.51829	1.81488	6.84854	5.0024	5.92547	7.81226	5.07472e-06	5.4614e-05	5.48619	5.03447	4.48653	6.97439	6.79506	6.77616
IZUMO4	4.21574	2.07578	6.09365	3.99218	5.04292	7.7683	5.3717e-06	5.70771e-05	4.45224	3.90772	3.61659	6.14676	6.21395	5.92024
ZNF490	8.34873	3.06156	5.38594	2.34693	3.86644	7.76218	5.4145e-06	5.73864e-05	2.1754	2.1999	2.6655	5.61913	5.02953	5.50917
RHOJ	33.9342	5.08467	3.59883	-1.49114	1.05384	7.75593	5.45855e-06	5.77558e-05	-1.52504	-1.70699	-1.24139	3.9962	3.15506	3.64523
SRSF2	2.49899	1.32134	7.0287	5.70979	6.36925	7.747	5.52221e-06	5.8329e-05	5.85867	5.64173	5.62897	7.0597	6.87022	7.15619
IFRD2	4.06861	2.02454	6.32554	4.28077	5.30315	7.74325	5.54921e-06	5.85181e-05	4.02955	4.76874	4.04401	6.14676	6.28159	6.54827
ZIK1	8.59884	3.10414	5.81564	2.75805	4.28684	7.74173	5.56015e-06	5.85352e-05	2.1754	2.81657	3.28217	5.69219	5.51495	6.23978
TNFRSF12A	4.56399	2.1903	5.93648	3.77165	4.85407	7.72651	5.67131e-06	5.95559e-05	4.08967	3.42229	3.803	5.65612	6.11853	6.0348
AC226150.4	16.811	4.07133	5.31924	1.29029	3.30477	7.70902	5.80196e-06	6.07756e-05	0.79689	0.614935	2.45905	5.58116	5.22545	5.15112
SLC30A1	2.96997	1.57045	7.48426	5.88805	6.68615	7.70766	5.81227e-06	6.08328e-05	6.09701	6.01411	5.55302	7.45563	7.7912	7.20594
AC073834.3	4.01527	2.0055	6.63776	4.66582	5.65179	7.68447	5.99079e-06	6.24931e-05	4.77874	4.27029	4.94843	6.29485	7.00972	6.6087
MYCBP	2.42203	1.27622	7.40368	6.13699	6.77033	7.66668	6.13172e-06	6.37517e-05	6.19606	5.97249	6.24242	7.22886	7.61885	7.36332
AC107079.1	17.9561	4.1664	5.18898	0.964299	3.07664	7.6646	6.14848e-06	6.3873e-05	0.79689	1.75244	0.34357	5.41843	5.31426	4.83426
RBM7	2.63434	1.39744	7.14908	5.76453	6.45681	7.65701	6.20981e-06	6.44037e-05	5.94257	5.43256	5.91848	7.25321	7.09992	7.09413
TUBGCP6	2.69638	1.43103	7.42475	6.01014	6.71744	7.63547	6.38767e-06	6.5922e-05	5.63483	6.00037	6.39523	7.45563	7.36191	7.4567
HTR2A	30.9612	4.95239	4.50463	-0.4345	2.03507	7.63041	6.43022e-06	6.62762e-05	-1.52504	-0.122031	0.34357	4.63774	4.20236	4.6738
SCO2	2.28052	1.18936	7.50695	6.32669	6.91682	7.61928	6.52489e-06	6.68988e-05	6.11159	6.37516	6.49332	7.41304	7.51026	7.59756
IL17REL	5.62079	2.49077	5.58383	3.09211	4.33797	7.59364	6.74869e-06	6.87448e-05	2.72289	3.15099	3.40246	5.86013	5.51495	5.37641
VPS13B	2.57537	1.36478	7.59362	6.21056	6.90209	7.5905	6.77664e-06	6.89177e-05	6.16845	6.32091	6.14231	7.78279	7.74402	7.25404
RASGRP1	2.19278	1.13276	8.42834	7.29722	7.86278	7.5698	6.9642e-06	7.05701e-05	7.2596	7.13536	7.4967	8.62147	8.45029	8.21326
FLT1	35.9317	5.16719	4.1905	-0.962821	1.61384	7.56947	6.96719e-06	7.05701e-05	0.059924	-1.70699	-1.24139	4.30654	3.77173	4.49323
GNB2L1	2.24795	1.16861	7.99653	6.8247	7.41061	7.56596	6.9995e-06	7.07875e-05	6.84565	6.96896	6.65947	7.9998	7.7912	8.19859
AJ003147.9	4.20443	2.07191	7.14959	5.12327	6.13643	7.5653	7.00569e-06	7.0789e-05	5.5939	4.3591	5.41682	6.9448	7.29802	7.20594
CCDC47	2.63698	1.39889	7.34771	5.92969	6.6387	7.56352	7.02217e-06	7.08985e-05	5.97481	6.00037	5.81389	7.48677	7.53819	7.01818
C10orf2	3.17202	1.6654	6.12097	4.47014	5.29556	7.55246	7.12545e-06	7.17683e-05	4.4057	4.31537	4.68935	6.24716	6.01635	6.09941
EMC2	18.1876	4.18488	5.01545	0.79898	2.90722	7.54351	7.21035e-06	7.23571e-05	0.059924	1.99345	0.34357	4.90693	5.02953	5.1099
MANEAL	3.81386	1.93125	6.25198	4.32088	5.28643	7.53258	7.31542e-06	7.3038e-05	4.14739	4.22374	4.5915	6.53225	6.30345	5.92024
HDAC1	2.6805	1.4225	7.33861	5.91811	6.62836	7.53112	7.32955e-06	7.3063e-05	6.00634	5.87044	5.87755	7.04583	7.67862	7.29139
TMEM35	24.9242	4.63947	4.7407	0.0938211	2.41726	7.52727	7.36705e-06	7.33786e-05	0.059924	-0.122031	0.34357	4.63774	5.22545	4.35893
AC016999.2	4.22202	2.07793	5.71431	3.65854	4.68643	7.52156	7.42299e-06	7.38188e-05	3.42916	3.50246	4.04401	5.86013	5.62321	5.65958
NDUFB5	11.2528	3.49222	4.96162	1.4521	3.20686	7.51799	7.45816e-06	7.41099e-05	0.79689	1.99345	1.56596	5.02477	4.97609	4.88402
NUAK2	13.553	3.76054	4.80952	1.02961	2.91956	7.51194	7.51824e-06	7.45302e-05	1.28232	1.46293	0.34357	4.70989	4.74002	4.97865
CA14	2.32167	1.21516	7.9624	6.76024	7.36132	7.50975	7.54017e-06	7.46299e-05	6.63987	6.59221	7.04863	7.8482	8.15806	7.88096
GPR61	2.91899	1.54547	7.11191	5.58189	6.3469	7.50157	7.62243e-06	7.52072e-05	5.69413	5.28169	5.76984	6.92977	7.43304	6.97292
TPRA1	11.6422	3.54129	5.43855	1.86377	3.65116	7.49303	7.70941e-06	7.58819e-05	1.28232	2.38047	1.92853	5.46086	5.78733	5.06746
SHBG	6.51797	2.70442	5.2091	2.5208	3.86495	7.49249	7.71496e-06	7.58819e-05	2.1754	2.54093	2.84607	5.32962	5.02953	5.26816
AFF1	6.88205	2.78284	6.43744	3.5551	4.99627	7.4887	7.75393e-06	7.62055e-05	3.68441	4.52183	2.45905	6.38576	6.52429	6.40225
PARP10	4.68074	2.22674	6.17033	3.99044	5.08039	7.45657	8.09281e-06	7.88578e-05	3.51936	3.96543	4.48653	5.82807	6.21395	6.46898
TMED6	3.26149	1.70553	6.90545	5.20766	6.05655	7.43771	8.29905e-06	8.07423e-05	5.46365	4.8008	5.35852	7.07344	7.04907	6.59383
SPESP1	7.01365	2.81017	5.22117	2.40712	3.81415	7.41513	8.55347e-06	8.2694e-05	2.1754	2.38047	2.6655	5.37471	5.35669	4.93211
CNOT2	3.44309	1.7837	5.96253	4.15836	5.06045	7.41475	8.55785e-06	8.2694e-05	4.02955	4.40153	4.04401	5.9222	6.11853	5.84686
PTMA	3.20795	1.68165	7.98198	6.27258	7.12728	7.41454	8.56024e-06	8.2694e-05	6.63987	6.57378	5.6041	7.91839	7.87388	8.15366
SLC26A5	5.57063	2.47784	5.49532	3.05775	4.27653	7.38869	8.8619e-06	8.52941e-05	3.11882	2.54093	3.5135	5.41843	5.69111	5.37641
SLC37A2	6.74919	2.75472	5.07114	2.34693	3.70904	7.3845	8.91188e-06	8.57095e-05	2.38185	1.99345	2.6655	4.96705	5.1789	5.06746
PIK3IP1	3.22468	1.68915	6.31932	4.61351	5.46642	7.37524	9.02341e-06	8.64598e-05	4.70378	4.59679	4.53997	6.64696	6.19068	6.12031
FRYL	19.6671	4.29771	5.94483	1.56466	3.75475	7.37249	9.05672e-06	8.66968e-05	0.79689	2.81657	1.08054	6.12052	6.23685	5.47711
H2AFJ	4.69254	2.23037	5.562	3.36455	4.46327	7.35442	9.27958e-06	8.83e-05	3.22985	3.15099	3.7128	5.65612	5.31426	5.71562
ANKS3	2.57904	1.36684	6.44266	5.08454	5.7636	7.35152	9.31585e-06	8.85696e-05	5.04482	5.00725	5.20155	6.49189	6.36711	6.46898
RPL18A	7.2479	2.85756	5.17648	2.31146	3.74397	7.34108	9.44775e-06	8.96288e-05	2.72289	1.99345	2.21804	5.28308	5.31426	4.93211
C21orf90	25.7552	4.68679	4.25372	-0.4345	1.90961	7.32698	9.62904e-06	9.09369e-05	0.059924	-0.122031	-1.24139	3.8759	4.45762	4.42764
TBC1D17	3.53537	1.82186	6.87799	5.05799	5.96799	7.32041	9.7148e-06	9.16092e-05	5.16146	5.18782	4.8247	6.38576	7.06195	7.18625
SLMO2	4.1559	2.05516	5.67602	3.6181	4.64706	7.31341	9.80709e-06	9.24101e-05	4.02955	3.42229	3.40246	5.58116	5.78733	5.65958
SAFB2	3.542	1.82457	7.08474	5.2035	6.14412	7.29931	9.99575e-06	9.38361e-05	5.39382	5.67671	4.53997	7.26523	7.07472	6.91426
C8orf4	5.71587	2.51497	5.65502	3.15425	4.40464	7.29574	1.00442e-05	9.41503e-05	3.51936	2.93686	3.00654	5.72738	5.27053	5.96716
TOMM34	3.13548	1.64869	6.09407	4.42332	5.2587	7.29139	1.01035e-05	9.44636e-05	4.45224	4.63286	4.18487	6.01055	6.23685	6.0348
TXNIP	15.2474	3.93049	5.90026	1.94762	3.92394	7.29108	1.01077e-05	9.44636e-05	2.38185	2.38047	1.08054	5.46086	5.78733	6.45258
AP001619.3	2.69984	1.43287	6.22113	4.78688	5.504	7.27556	1.03224e-05	9.60421e-05	4.70378	4.83217	4.8247	6.22271	6.25939	6.18128
PWP2	4.00493	2.00178	6.50245	4.46613	5.48429	7.27164	1.03774e-05	9.64821e-05	4.74175	4.76874	3.88789	6.59075	6.16703	6.74957
ZNF41	4.16847	2.05952	6.33735	4.22355	5.28045	7.26736	1.04378e-05	9.68289e-05	4.30785	4.55979	3.803	6.47128	6.5969	5.94389
C1orf85	2.92815	1.54999	7.64574	6.10909	6.87741	7.25668	1.05902e-05	9.77382e-05	5.82369	5.94406	6.55951	7.65155	7.93116	7.35452
DDX3X	3.50684	1.81017	7.37649	5.51501	6.44575	7.25055	1.06788e-05	9.83391e-05	5.50838	6.16952	4.86713	7.41304	7.36191	7.35452
UPK2	2.55061	1.35084	7.12094	5.76411	6.44252	7.24599	1.07452e-05	9.88774e-05	5.50838	6.01411	5.76984	6.95967	7.31963	7.08352
NT5DC4	2.09457	1.06665	7.42978	6.35811	6.89394	7.24128	1.08141e-05	9.93863e-05	6.39977	6.3537	6.32085	7.57634	7.34092	7.37206
LAMTOR4	2.19141	1.13186	7.83222	6.69871	7.26547	7.2402	1.08301e-05	9.94406e-05	6.44651	6.87421	6.77542	7.94105	7.68696	7.86865
DUSP4	33.866	5.08176	4.40061	-0.717165	1.84172	7.23409	1.09204e-05	0.000100051	-1.52504	0.614935	-1.24139	4.77861	4.37745	4.04577
SIK1	5.68175	2.50634	6.60494	4.02676	5.31585	7.22086	1.11189e-05	0.000101573	4.4057	4.66805	3.00654	6.59075	6.3462	6.87789
SKIV2L	2.51684	1.33161	6.56774	5.23816	5.90295	7.21156	1.12607e-05	0.000102405	5.41748	5.16337	5.13365	6.51221	6.52429	6.66671
AC008440.5	2.27485	1.18577	7.63964	6.46962	7.05463	7.2113	1.12648e-05	0.000102405	6.30151	6.30981	6.79753	7.58596	7.72795	7.605
SEH1L	2.07356	1.05211	7.50073	6.44851	6.97462	7.21071	1.12737e-05	0.000102405	6.54642	6.37516	6.42394	7.43449	7.62755	7.44016
ADH4	27.9337	4.80393	4.34356	-0.4345	1.95453	7.20176	1.14122e-05	0.000103351	0.059924	-1.70699	0.34357	4.63774	4.10615	4.28678
ASZ1	12.372	3.629	5.02923	1.4521	3.24066	7.19702	1.14863e-05	0.000103948	1.28232	0.614935	2.45905	5.23498	4.92059	4.93211
LOX	2.24458	1.16645	7.42118	6.24856	6.83487	7.17684	1.18074e-05	0.000106324	6.31417	6.15719	6.27431	7.58596	7.49134	7.18625
AC100830.4	3.27466	1.71134	5.8505	4.15006	5.00028	7.15021	1.2246e-05	0.000109327	3.90123	4.17565	4.37332	5.79528	5.93467	5.82155
ZBTB14	7.74465	2.9532	4.89262	1.95212	3.42237	7.14787	1.22854e-05	0.000109601	1.64489	1.99345	2.21804	5.02477	4.67443	4.97865
ITFG3	12.6961	3.66631	4.73343	1.02961	2.88152	7.1328	1.25421e-05	0.000111417	1.64489	1.10036	0.34357	4.84419	4.86288	4.49323
IFI35	4.22976	2.08058	5.83519	3.79838	4.81679	7.09944	1.31309e-05	0.000115687	3.68441	3.3374	4.37332	5.82807	5.98963	5.68787
ADH6	16.895	4.07853	4.18111	0.0938211	2.13747	7.07206	1.36363e-05	0.000119116	0.059924	-0.122031	0.34357	4.30654	4.37745	3.85935
RND3	22.9232	4.51874	5.18533	0.597787	2.89156	7.06793	1.37143e-05	0.000119548	1.28232	1.75244	-1.24139	5.1337	5.08106	5.34122
SPON1	2.23731	1.16177	7.35206	6.20585	6.77895	7.04541	1.41481e-05	0.000122819	6.09701	6.05456	6.46597	7.41304	7.21971	7.42344
HNRNPA0	4.96789	2.31263	5.66696	3.30784	4.4874	7.0388	1.42782e-05	0.000123607	3.22985	3.8476	2.84607	5.86013	5.39791	5.74284
TRMT44	2.65102	1.40655	6.48828	5.08183	5.78506	7.01833	1.46892e-05	0.000126555	4.9179	5.06119	5.2664	6.68326	6.46734	6.31426
C15orf37	2.07116	1.05044	7.45403	6.40104	6.92754	7.01777	1.47006e-05	0.000126566	6.4116	6.39629	6.39523	7.38025	7.63618	7.34567
LILRB3	3.51442	1.81329	6.50444	4.71949	5.61196	7.00965	1.48672e-05	0.000127477	4.88435	4.17565	5.09846	6.59075	6.6828	6.23978
FRMD8	2.11996	1.08404	7.31262	6.22982	6.77122	6.9929	1.52174e-05	0.000129859	6.09701	6.24137	6.35106	7.28898	7.44292	7.20594
ZRANB3	2.26307	1.17828	7.52111	6.34223	6.93167	6.99037	1.52712e-05	0.000130142	6.09701	6.39629	6.53339	7.55691	7.67862	7.3278
HIP1R	3.17396	1.66629	6.45181	4.78119	5.6165	6.98043	1.54838e-05	0.000131686	4.54105	5.11319	4.68935	6.12052	6.5969	6.638
GPRC5A	4.30496	2.106	5.62224	3.49873	4.56049	6.97133	1.56814e-05	0.000133186	3.42916	3.78486	3.28217	5.32962	5.90638	5.63073
POU5F1	2.74939	1.45911	6.62602	5.1852	5.90561	6.9575	1.59868e-05	0.000135166	5.10432	5.03447	5.41682	6.38576	6.9135	6.5788
AC023115.2	29.4666	4.88101	3.34905	-1.49114	0.928955	6.95194	1.61115e-05	0.000136012	-1.52504	-1.70699	-1.24139	3.05278	2.94861	4.04577
GAS5	3.67082	1.8761	5.92961	4.07379	5.0017	6.95129	1.6126e-05	0.000136043	4.4057	3.8476	3.96806	5.76173	5.78733	6.23978
ANXA3	4.91017	2.29577	5.54879	3.25392	4.40135	6.92272	1.67831e-05	0.000140736	3.33294	3.42229	3.00654	5.1337	5.69111	5.82155
EIF4A2	2.70568	1.43599	7.51719	6.07345	6.79532	6.9163	1.69347e-05	0.000141818	6.42333	6.11956	5.67747	7.47646	7.27607	7.79903
IGF2BP1	3.32874	1.73497	6.10937	4.34958	5.22948	6.90824	1.71271e-05	0.000143144	3.96681	4.76874	4.3132	6.24716	6.06835	6.0126
SH3YL1	3.24277	1.69723	6.11181	4.38996	5.25088	6.90675	1.7163e-05	0.000143253	4.58349	4.40153	4.18487	6.14676	6.36711	5.82155
NSD1	2.34168	1.22755	6.9941	5.75375	6.37393	6.90328	1.72467e-05	0.000143856	5.69413	6.01411	5.55302	7.00339	6.88479	7.09413
MTHFR	2.41126	1.26979	7.00791	5.75171	6.37981	6.89794	1.73764e-05	0.000144745	5.61451	5.56913	6.07149	7.04583	7.11235	6.86556
CCDC9	3.8038	1.92744	5.55894	3.59804	4.57849	6.89549	1.74362e-05	0.000145148	3.60424	3.90772	3.28217	5.54216	5.65756	5.47711
TUBA1B	2.41541	1.27227	6.76484	5.49534	6.13009	6.87714	1.78914e-05	0.000148152	5.67463	5.45288	5.35852	6.71866	6.61449	6.96138
HAUS2	8.46572	3.08163	4.93269	1.81861	3.37565	6.86826	1.81162e-05	0.00014962	2.1754	2.1999	1.08054	4.84419	4.80276	5.15112
GPR22	2.39494	1.25999	7.90641	6.65593	7.28117	6.86119	1.82975e-05	0.000150907	6.75573	6.29863	6.91343	8.15647	7.83688	7.72589
CENPN	2.02407	1.01726	8.20974	7.19504	7.70239	6.85531	1.84496e-05	0.000151775	6.95474	7.2029	7.42749	8.33248	8.20527	8.09149
CRYZL1	2.00947	1.00682	7.33543	6.33548	6.83546	6.84306	1.87708e-05	0.000153678	6.27586	6.32091	6.40966	7.31234	7.25379	7.44016
MCM7	2.13723	1.09574	7.97212	6.87048	7.4213	6.83883	1.88833e-05	0.000154332	6.72763	7.0645	6.8193	7.78279	8.22831	7.90525
LYRM1	4.20704	2.07281	5.73969	3.66609	4.70289	6.83109	1.90906e-05	0.000155521	3.22985	3.96543	3.803	5.46086	6.04258	5.71562
FEM1A	7.05936	2.81954	4.73953	1.90008	3.31981	6.8139	1.95599e-05	0.000158405	1.93439	2.1999	1.56596	4.70989	4.67443	4.83426
NUDT4	4.1615	2.0571	5.72153	3.68861	4.70507	6.79474	2.00977e-05	0.000162045	3.68441	3.3374	4.04401	5.61913	6.06835	5.47711
RASSF1	3.63671	1.86263	5.51919	3.63004	4.57462	6.77683	2.06146e-05	0.000165364	3.76036	3.8476	3.28217	5.50209	5.51495	5.54053
TMEM240	6.66217	2.73599	4.828	2.10128	3.46464	6.76145	2.10697e-05	0.000168156	1.64489	2.1999	2.45905	4.77861	4.97609	4.72929
C22orf24	2.64585	1.40373	6.05664	4.64872	5.35268	6.75315	2.13197e-05	0.000169614	4.70378	4.7024	4.53997	6.06659	5.96241	6.14092
NOTCH1	4.98104	2.31645	5.62541	3.31272	4.46906	6.75314	2.13199e-05	0.000169614	3.42916	3.50246	3.00654	5.28308	5.51495	6.07819
AC012146.7	23.2076	4.53653	4.05262	-0.4345	1.80906	6.74782	2.1482e-05	0.000170616	0.059924	-1.70699	0.34357	3.74466	4.20236	4.21083
RAC3	6.60432	2.72341	5.0945	2.37565	3.73507	6.74767	2.14865e-05	0.000170616	1.64489	2.81657	2.6655	4.90693	5.22545	5.15112
PAAF1	10.8475	3.43929	4.79488	1.3273	3.06109	6.73621	2.18397e-05	0.000172766	2.1754	1.46293	0.34357	4.63774	4.86288	4.88402
RHNO1	3.37964	1.75687	5.88961	4.12981	5.00971	6.73139	2.19904e-05	0.00017363	4.30785	3.96543	4.11616	5.79528	6.21395	5.65958
CDR2	4.33189	2.115	5.16793	3.04127	4.1046	6.71538	2.24981e-05	0.000177083	3.22985	3.04789	2.84607	5.28308	5.02953	5.1912
GTF3C4	3.17963	1.66886	5.99082	4.28793	5.13937	6.70308	2.28965e-05	0.000179544	4.30785	4.66805	3.88789	5.8915	6.06835	6.0126
U2AF2	2.28009	1.18909	7.22634	6.01352	6.61993	6.69887	2.30349e-05	0.000180516	6.00634	6.30981	5.72439	7.30071	7.24252	7.1358
GGPS1	9.30016	3.21726	4.7961	1.57296	3.18453	6.69632	2.3119e-05	0.00018095	2.1754	1.46293	1.08054	4.90693	4.45762	5.02374
PLK2	7.51683	2.91012	5.35847	2.44558	3.90203	6.69326	2.32201e-05	0.000181629	2.72289	2.68532	1.92853	5.02477	5.1789	5.87174
CGN	14.5148	3.85946	4.1905	0.339476	2.26499	6.69039	2.33159e-05	0.000182151	0.059924	0.614935	0.34357	4.30654	3.77173	4.49323
STC2	5.83552	2.54486	5.08272	2.55249	3.8176	6.67974	2.36738e-05	0.000184488	2.99852	1.99345	2.6655	5.18523	5.1789	4.88402
KLHDC9	3.37353	1.75426	5.76025	4.00653	4.88339	6.67181	2.3944e-05	0.000186478	4.25632	3.71927	4.04401	5.9222	5.81802	5.54053
ESD	12.3198	3.62291	5.30177	1.6063	3.45403	6.67098	2.39726e-05	0.000186585	2.72289	1.75244	0.34357	5.37471	5.55195	4.97865
HCG18	2.69988	1.4329	6.7851	5.36545	6.07527	6.66533	2.41676e-05	0.000187755	5.04482	5.28169	5.76984	6.83616	6.95553	6.56362
MTA2	4.40536	2.13926	6.63679	4.42605	5.53142	6.66099	2.43185e-05	0.000188577	4.98276	4.89292	3.40246	6.49189	6.79506	6.62342
PHF10	2.0653	1.04635	8.81244	7.7727	8.29257	6.65576	2.45015e-05	0.000189879	7.78102	7.50002	8.03706	8.88567	8.97097	8.58069
CRNKL1	2.86474	1.51841	6.18143	4.67149	5.42646	6.65283	2.46048e-05	0.000190399	5.01412	4.3591	4.64125	6.12052	6.30345	6.12031
CCDC137	3.7679	1.91376	6.73101	4.75995	5.74548	6.62509	2.56054e-05	0.000197218	5.13317	5.25879	3.88789	6.68326	6.63187	6.87789
CAPZA1	2.82167	1.49655	6.44319	4.92007	5.68163	6.61513	2.59751e-05	0.000199576	5.04482	4.97951	4.73589	6.80355	6.32498	6.20105
QRICH1	3.77799	1.91762	6.06725	4.0951	5.08117	6.58585	2.70954e-05	0.000206669	4.08967	4.48283	3.7128	6.14676	6.36711	5.68787
AC023590.1	3.52654	1.81825	5.7382	3.9484	4.8433	6.57735	2.743e-05	0.00020884	4.02955	3.50246	4.3132	5.9222	5.69111	5.60129
RBBP8NL	9.08931	3.18417	4.56424	1.39612	2.98018	6.57166	2.76565e-05	0.000210309	0.79689	1.46293	1.92853	4.39673	4.80276	4.49323
GFOD1	5.78524	2.53238	4.8727	2.34693	3.60981	6.56061	2.81024e-05	0.000213041	2.38185	2.1999	2.45905	4.70989	5.1789	4.72929
SMARCB1	6.1969	2.63155	4.93992	2.2666	3.60326	6.55132	2.84828e-05	0.000214962	1.93439	2.93686	1.92853	4.96705	4.92059	4.93211
EFNA1	4.52858	2.17906	5.46537	3.33248	4.39892	6.55113	2.84906e-05	0.000214962	3.33294	3.04789	3.61659	5.41843	5.13081	5.84686
MORN1	7.68151	2.94139	4.9897	2.04924	3.51947	6.5438	2.87947e-05	0.000216736	2.38185	2.1999	1.56596	4.63774	4.92059	5.41076
TSR3	21.9244	4.45446	5.59617	1.02961	3.31289	6.53544	2.91463e-05	0.00021912	1.64489	2.68532	-1.24139	5.72738	5.55195	5.50917
PDE10A	3.8711	1.95274	5.39529	3.42045	4.40787	6.52715	2.94988e-05	0.000221505	3.83251	3.42229	3.00654	5.41843	5.35669	5.41076
AC007401.2	3.1739	1.66626	5.98615	4.34001	5.16308	6.52435	2.96189e-05	0.00022182	4.4057	4.07437	4.53997	5.76173	6.32498	5.87174
C19orf24	2.55268	1.35201	6.13791	4.78254	5.46022	6.51705	2.99348e-05	0.000223312	4.70378	4.86286	4.78098	6.01055	6.32498	6.07819
TSTA3	12.387	3.63076	5.57227	1.86377	3.71802	6.51455	3.00437e-05	0.000223858	2.56242	2.68532	0.34357	5.1337	5.78733	5.79579
C15orf40	2.65395	1.40814	7.36194	5.94264	6.65229	6.50705	3.03731e-05	0.000225911	6.32671	5.77682	5.72439	7.25321	7.72795	7.10466
MED22	2.80934	1.49023	6.45976	4.94386	5.70181	6.49551	3.08874e-05	0.000229117	5.39382	4.95122	4.48653	6.51221	6.44784	6.41923
PLIN5	23.1528	4.53311	3.57882	-0.962821	1.308	6.4934	3.09826e-05	0.000229494	-1.52504	-1.70699	0.34357	3.8759	3.33563	3.52494
FBXO10	2.72578	1.44667	6.39054	4.96702	5.67878	6.49261	3.10182e-05	0.000229564	4.74175	4.89292	5.2664	6.12052	6.63187	6.41923
AC005356.1	3.10947	1.63667	5.63593	4.01277	4.82435	6.49029	3.11233e-05	0.000230129	3.83251	4.02093	4.18487	5.46086	5.78733	5.65958
C6orf48	7.03612	2.81478	4.47168	1.65443	3.06305	6.48928	3.11691e-05	0.000230198	1.64489	1.75244	1.56596	4.48162	4.37745	4.55596
GNAI2	3.81795	1.9328	5.64036	3.67515	4.65776	6.47539	3.18066e-05	0.000233943	3.96681	3.90772	3.15093	5.72738	5.39791	5.79579
CYBA	2.98122	1.5759	6.1383	4.52642	5.33236	6.47041	3.20385e-05	0.000235374	4.49733	4.76874	4.3132	6.24716	6.3462	5.82155
YY1AP1	4.67114	2.22377	5.39243	3.12347	4.25795	6.46781	3.21607e-05	0.000235995	3.33294	3.57841	2.45905	5.18523	5.51495	5.47711
CCDC180	20.292	4.34284	2.82639	-1.49114	0.667623	6.46154	3.24564e-05	0.000237749	-1.52504	-1.70699	-1.24139	2.52227	2.7076	3.2493
RNF208	8.10613	3.01901	5.06064	2.00111	3.53087	6.43271	3.3854e-05	0.000246122	2.38185	2.54093	1.08054	4.70989	5.13081	5.34122
PHLDA1	5.76141	2.52642	5.4658	2.92577	4.19579	6.43217	3.3881e-05	0.000246131	2.72289	3.04789	3.00654	6.01055	4.97609	5.41076
CNN2	5.77876	2.53076	5.40284	2.82126	4.11205	6.42476	3.42509e-05	0.000248289	3.42916	2.81657	2.21804	5.46086	5.7239	5.02374
RPL21	19.4949	4.28502	2.79305	-1.49114	0.650952	6.4241	3.42838e-05	0.000248385	-1.52504	-1.70699	-1.24139	3.05278	2.41809	2.90826
SLC3A2	3.79806	1.92526	6.11947	4.13158	5.12553	6.41055	3.49719e-05	0.000252352	4.25632	4.73595	3.40246	6.22271	5.93467	6.20105
KLHL35	7.59044	2.92418	5.00145	2.10943	3.55544	6.41012	3.49941e-05	0.000252367	1.28232	2.38047	2.6655	5.02477	4.67443	5.30515
BANF1	2.96689	1.56895	6.63348	5.0455	5.83949	6.40544	3.52353e-05	0.000253961	5.29514	4.89292	4.94843	6.81995	6.89922	6.18128
AC022173.2	3.66755	1.87482	5.30106	3.42291	4.36198	6.40299	3.53626e-05	0.000254586	3.33294	3.42229	3.5135	5.54216	5.13081	5.23019
HIST1H1T	25.2224	4.65664	4.39063	-0.188845	2.10089	6.39412	3.58263e-05	0.000257042	0.059924	-1.70699	1.08054	3.8759	4.80276	4.49323
TTC7A	2.7582	1.46373	5.87498	4.40058	5.13778	6.38245	3.64463e-05	0.000261043	4.4057	4.48283	4.3132	5.76173	6.09366	5.76956
EDN1	7.83469	2.96988	4.49782	1.53357	3.01569	6.37939	3.66106e-05	0.000261326	1.28232	1.75244	1.56596	4.56179	4.20236	4.72929
AC007246.3	7.04747	2.81711	4.89738	2.06189	3.47964	6.34427	3.8556e-05	0.000273658	1.28232	2.68532	2.21804	4.77861	5.13081	4.78273
MCC	2.06306	1.04479	6.83668	5.78557	6.31112	6.32725	3.95382e-05	0.000279293	5.78784	5.77682	5.79203	6.95967	6.8555	6.69486
PASK	4.70052	2.23282	5.79735	3.52879	4.66307	6.3133	4.03626e-05	0.000284234	3.96681	3.3374	3.28217	6.29485	5.75596	5.34122
CTHRC1	3.77459	1.91632	6.25743	4.30882	5.28312	6.31169	4.04591e-05	0.000284754	4.4057	4.27029	4.25046	6.75322	6.30345	5.71562
XPC	2.28549	1.1925	7.15161	5.95936	6.55549	6.30544	4.08354e-05	0.00028644	5.85867	6.08091	5.93852	6.83616	7.46249	7.15619
QRICH2	8.82986	3.14239	5.38621	2.26309	3.82465	6.30295	4.09864e-05	0.000287179	1.64489	2.68532	2.45905	4.70989	5.81802	5.63073
CCDC77	2.12732	1.08904	8.08653	7.00627	7.5464	6.29948	4.11978e-05	0.00028831	7.04861	6.7318	7.23839	8.01412	8.36451	7.88096
DNAH14	2.64863	1.40525	6.29774	4.86042	5.57908	6.29919	4.12153e-05	0.00028831	4.77874	5.11319	4.68935	6.51221	6.3462	6.0348
NDUFA4L2	2.43551	1.28422	6.74714	5.47469	6.11092	6.28519	4.20805e-05	0.000292886	5.34533	5.60589	5.47285	6.49189	6.66602	7.08352
KIAA0196	5.20446	2.37975	5.5931	3.12932	4.36121	6.28215	4.22707e-05	0.000293885	3.51936	3.65056	2.21804	5.65612	5.81802	5.30515
TACSTD2	3.03795	1.6031	5.7935	4.21089	5.0022	6.27513	4.27139e-05	0.000296638	3.96681	4.1259	4.53997	5.9817	5.55195	5.84686
SNHG1	8.58087	3.10112	6.03311	2.88211	4.45761	6.27107	4.2972e-05	0.000297608	2.99852	3.71927	1.92853	5.79528	5.62321	6.68085
WEE1	10.2854	3.36253	5.01695	1.60476	3.31086	6.26898	4.31062e-05	0.000298209	0.79689	2.93686	1.08054	4.77861	5.08106	5.1912
ZHX2	22.9797	4.52229	4.76735	0.190323	2.47884	6.26731	4.32132e-05	0.000298686	-1.52504	1.75244	0.34357	5.08026	4.86288	4.35893
KLHL8	5.09234	2.34833	5.1241	2.75861	3.94135	6.26543	4.3334e-05	0.00029929	2.38185	3.04789	2.84607	5.50209	4.80276	5.06746
AP001439.2	5.24482	2.39089	5.22605	2.83515	4.0306	6.26333	4.34698e-05	0.000299899	2.1754	3.04789	3.28217	5.58116	5.02953	5.06746
TGIF1	2.17117	1.11847	6.9449	5.82228	6.38359	6.25039	4.4315e-05	0.000304864	5.5939	6.08091	5.79203	6.83616	6.96927	7.02928
LMF1	24.3844	4.60789	4.59235	-0.0270356	2.28266	6.24985	4.43505e-05	0.000304864	0.059924	1.10036	-1.24139	4.30654	4.20236	5.26816
AC064853.2	15.0288	3.90966	4.01823	0.0938211	2.05603	6.24793	4.44773e-05	0.000305341	0.059924	-0.122031	0.34357	3.9962	4.53357	3.52494
P4HTM	2.61316	1.3858	6.38617	4.98142	5.6838	6.24074	4.49566e-05	0.000308127	4.95069	5.30423	4.68935	6.14676	6.54279	6.46898
TERF2IP	3.1964	1.67645	5.45928	3.77597	4.61762	6.21417	4.67751e-05	0.000318779	4.02955	3.78486	3.5135	5.32962	5.47699	5.57123
NDUFA1	2.11495	1.08062	7.00445	5.93678	6.47061	6.20166	4.76585e-05	0.000323471	5.82369	5.77682	6.20982	6.97439	7.12468	6.91426
GINS3	2.19115	1.13169	7.13391	5.99983	6.56687	6.19165	4.83773e-05	0.000327289	5.80588	6.00037	6.19324	7.21653	7.31963	6.86556
CDKN3	3.97985	1.99271	5.88963	3.93266	4.91114	6.19114	4.84147e-05	0.000327365	4.02955	3.3374	4.43103	5.8915	6.23685	5.54053
GPR113	2.01137	1.00818	7.30255	6.28892	6.79574	6.18509	4.88554e-05	0.000329991	6.49177	6.18175	6.19324	7.28898	7.46249	7.15619
NECAB3	3.02491	1.59689	5.4617	3.86143	4.66157	6.18361	4.8964e-05	0.000330547	3.76036	4.02093	3.803	5.32962	5.51495	5.54053
AP001046.6	32.5712	5.02552	4.28021	-0.717165	1.78152	6.17959	4.92596e-05	0.000331829	0.79689	-1.70699	-1.24139	4.56179	3.49609	4.78273
AZIN1	2.75157	1.46025	5.69569	4.24815	4.97192	6.17396	4.96769e-05	0.000334461	4.08967	4.22374	4.43103	5.58116	5.81802	5.68787
ARF1	2.75529	1.4622	6.61871	5.16439	5.89155	6.16744	5.01656e-05	0.000336904	4.98276	5.41195	5.09846	6.22271	6.64905	6.98437
SNHG15	6.21964	2.63683	5.27828	2.6614	3.96984	6.14376	5.19818e-05	0.00034719	2.38185	2.93686	2.6655	5.18523	4.80276	5.84686
RHBDF1	2.0139	1.00999	7.09054	6.08839	6.58947	6.14231	5.20953e-05	0.000347726	5.85867	6.13221	6.27431	7.03182	7.12468	7.11512
RLTPR	2.00521	1.00375	7.47994	6.48484	6.98239	6.12688	5.33192e-05	0.000354053	6.26286	6.42743	6.76423	7.60501	7.40299	7.43183
AP000708.1	19.8803	4.31327	2.86186	-1.49114	0.68536	6.10913	5.47658e-05	0.000362146	-1.52504	-1.70699	-1.24139	3.25923	3.15506	2.1713
MDC1	3.85294	1.94596	5.96228	3.98954	4.97591	6.1051	5.50992e-05	0.000363759	4.77874	3.90772	3.28217	5.86013	5.90638	6.12031
WDR90	4.86666	2.28293	5.37086	3.03706	4.20396	6.10331	5.52488e-05	0.000364555	2.86728	3.78486	2.45905	5.08026	5.58802	5.44432
RENBP	10.6045	3.40661	4.19879	0.74694	2.47286	6.10245	5.53208e-05	0.000364838	0.79689	1.10036	0.34357	4.30654	4.53357	3.75626
FLYWCH1	3.17187	1.66533	5.80963	4.13538	4.97251	6.09203	5.61976e-05	0.000370039	4.20288	4.31537	3.88789	5.8915	5.43799	6.09941
LY6G5C	3.91581	1.96931	5.01167	3.01544	4.01356	6.0842	5.68666e-05	0.000374248	3.22985	3.15099	2.6655	5.08026	4.97609	4.97865
ADH1A	18.9851	4.24679	2.79305	-1.49114	0.650952	6.06861	5.82246e-05	0.000382188	-1.52504	-1.70699	-1.24139	3.25923	2.94861	2.1713
CBX8	4.55315	2.18687	5.10127	2.94054	4.02091	6.06715	5.83535e-05	0.000382831	2.99852	2.81657	3.00654	4.63774	5.39791	5.26816
TAGLN2	4.91949	2.29851	5.2583	2.92221	4.09025	6.06369	5.86595e-05	0.000384437	2.38185	3.71927	2.6655	5.28308	5.08106	5.41076
TMEM39B	4.37033	2.12774	4.96582	2.85305	3.90943	6.05992	5.89961e-05	0.000386441	2.72289	2.68532	3.15093	4.84419	5.27053	4.78273
IRF9	9.87373	3.30359	4.4139	1.1544	2.78415	6.05106	5.97933e-05	0.000390849	0.79689	1.10036	1.56596	4.30654	4.00305	4.93211
PFKL	2.76012	1.46473	5.80393	4.33834	5.07113	6.04565	6.02863e-05	0.000393458	4.49733	4.40153	4.11616	5.58116	5.81802	6.0126
DNAJB13	2.12273	1.08592	6.6065	5.52383	6.06516	6.01524	6.31373e-05	0.00040888	5.41748	5.45288	5.70112	6.73604	6.61449	6.46898
P4HA2	3.02373	1.59633	5.43115	3.81692	4.62404	6.01148	6.34996e-05	0.000410591	4.02955	3.90772	3.5135	5.41843	5.39791	5.47711
KIF22	2.14485	1.10088	6.89039	5.81076	6.35058	6.00826	6.38121e-05	0.000412188	5.63483	5.74422	6.05323	6.78697	6.77955	7.10466
CEP95	2.04095	1.02924	7.16828	6.13314	6.65071	6.00767	6.38697e-05	0.000412348	6.18232	6.29863	5.91848	6.95967	7.25379	7.29139
RIC8A	2.03	1.02148	6.78651	5.76998	6.27824	5.986	6.60137e-05	0.000423579	5.80588	5.60589	5.89816	6.85219	6.84062	6.66671
BRD2	5.12691	2.35809	7.08728	4.6503	5.86879	5.98335	6.62819e-05	0.000425083	5.53024	5.1385	3.28217	7.03182	6.84062	7.38939
ADAM21	17.7322	4.1483	4.08839	-0.0270356	2.03068	5.98257	6.63603e-05	0.000425291	-1.52504	-0.122031	1.56596	4.30654	4.00305	3.95557
RUNDC3A	2.09935	1.06995	7.31848	6.26714	6.79281	5.97985	6.66367e-05	0.000426272	6.02186	6.18175	6.59781	7.35796	7.14903	7.44846
ILVBL	2.14199	1.09895	6.682	5.5883	6.13515	5.97835	6.67891e-05	0.000426812	5.46365	5.53141	5.76984	6.62846	6.88479	6.53275
AC073130.1	17.972	4.16768	2.67219	-1.49114	0.590524	5.97738	6.68879e-05	0.000427226	-1.52504	-1.70699	-1.24139	3.05278	2.05552	2.90826
NFYC	2.55624	1.35402	6.00574	4.63032	5.31803	5.97345	6.72913e-05	0.000429366	4.62471	4.89292	4.37332	5.86013	6.16703	5.99006
BCL2L14	3.5166	1.81418	5.77744	3.93159	4.85451	5.97271	6.73674e-05	0.000429634	3.83251	4.07437	3.88789	5.86013	6.16703	5.30515
RPL27A	2.01651	1.01186	7.19477	6.1927	6.69374	5.95227	6.95059e-05	0.00044148	6.08229	6.14476	6.35106	7.32388	6.94165	7.31879
IFT140	2.10578	1.07436	7.41908	6.35165	6.88536	5.94571	7.02074e-05	0.000445261	6.4116	6.41713	6.22621	7.25321	7.23116	7.77286
RRAS	2.39429	1.2596	6.27689	5.02792	5.6524	5.94443	7.03445e-05	0.000445905	5.18921	4.83217	5.06239	6.06659	6.52429	6.23978
TRIP6	3.01514	1.59223	5.41029	3.81762	4.61396	5.93663	7.11901e-05	0.000450584	3.51936	3.96543	3.96806	5.37471	5.51495	5.34122
SRSF1	2.57993	1.36733	6.79954	5.3975	6.09852	5.93623	7.12348e-05	0.00045064	5.61451	5.71086	4.86713	6.95967	6.56105	6.87789
TSG101	2.67895	1.42167	5.90456	4.46573	5.18514	5.93454	7.14187e-05	0.000451349	4.66479	4.3591	4.37332	6.12052	5.96241	5.63073
PPIA	3.62616	1.85844	5.90982	3.99602	4.95292	5.92099	7.2919e-05	0.000459444	3.83251	4.44275	3.7128	6.40762	5.69111	5.63073
SPAG7	2.76354	1.46652	5.85307	4.38452	5.1188	5.90943	7.4225e-05	0.000466504	4.08967	4.63286	4.43103	5.61913	6.06835	5.87174
SPINK4	4.00624	2.00225	5.30643	3.26667	4.28655	5.90393	7.48544e-05	0.00046999	2.99852	3.65056	3.15093	5.28308	5.65756	4.97865
IRS2	3.92785	1.97374	5.32388	3.34378	4.33383	5.88155	7.74773e-05	0.00048356	2.86728	3.65056	3.5135	5.61913	4.97609	5.37641
ARHGDIG	15.7946	3.98136	3.00323	-0.962821	1.0202	5.87677	7.80501e-05	0.000486893	-1.52504	-0.122031	-1.24139	2.81177	2.94861	3.2493
SNHG16	7.8234	2.9678	4.70189	1.68273	3.19231	5.87338	7.84585e-05	0.000488955	1.28232	2.68532	1.08054	4.84419	4.37745	4.88402
IL6	6.00949	2.58724	5.69269	2.99049	4.34159	5.86515	7.94608e-05	0.000494467	2.86728	4.17565	1.92853	5.72738	5.90638	5.44432
ARHGAP26	17.0502	4.09171	3.39507	-0.717165	1.33895	5.85098	8.12184e-05	0.000502635	-1.52504	0.614935	-1.24139	3.60027	3.33563	3.2493
DERL1	5.37877	2.42728	4.50767	2.04061	3.27414	5.84094	8.24882e-05	0.000509522	2.1754	2.38047	1.56596	4.56179	4.53357	4.42764
TRIM11	12.5697	3.65188	4.70179	1.04464	2.87321	5.83355	8.34356e-05	0.000514111	0.79689	1.99345	0.34357	4.56179	4.20236	5.34122
TSSC1	4.61907	2.2076	4.76463	2.54208	3.65336	5.82745	8.42272e-05	0.000518266	2.72289	2.68532	2.21804	4.48162	5.02953	4.78273
TRAPPC8	5.24688	2.39146	4.82707	2.37565	3.60136	5.8274	8.42338e-05	0.000518266	2.38185	2.81657	1.92853	5.18523	4.74002	4.55596
SLC12A6	2.99844	1.58421	5.62075	4.01386	4.81731	5.82024	8.51727e-05	0.000522509	4.20288	4.1259	3.7128	5.41843	5.93467	5.50917
ISG20L2	2.6963	1.43098	5.82718	4.37644	5.10181	5.81577	8.57652e-05	0.000525375	4.25632	4.55979	4.3132	5.76173	6.11853	5.60129
PAN3	3.8412	1.94156	5.06675	3.11415	4.09045	5.80266	8.75262e-05	0.000534339	2.99852	3.3374	3.00654	4.77861	5.39791	5.02374
SLMAP	2.98363	1.57707	5.68227	4.06216	4.87222	5.79368	8.87547e-05	0.000540789	4.3576	4.31537	3.5135	5.69219	5.7239	5.63073
ZNF668	2.21385	1.14656	6.26159	5.13802	5.69981	5.78818	8.95155e-05	0.00054516	5.13317	4.92236	5.35852	6.19783	6.23685	6.3501
YOD1	6.55329	2.71222	4.94718	2.15318	3.55018	5.78573	8.98567e-05	0.000546973	2.56242	2.81657	1.08054	5.23498	4.67443	4.93211
ACTR1B	17.6165	4.13886	5.03507	0.790689	2.91288	5.78063	9.05721e-05	0.000550262	0.79689	2.81657	-1.24139	5.23498	4.80276	5.06746
MGME1	5.16447	2.36862	4.73248	2.30683	3.51966	5.75393	9.4414e-05	0.000570084	2.1754	2.81657	1.92853	4.90693	4.86288	4.42764
AIRN	2.93602	1.55386	5.86269	4.30781	5.08525	5.75386	9.44244e-05	0.000570084	3.96681	4.31537	4.64125	6.01055	6.06835	5.50917
UTS2B	2.61984	1.38948	5.80401	4.43801	5.12101	5.74701	9.54385e-05	0.000575102	4.45224	4.1259	4.73589	5.76173	5.96241	5.68787
LINC00958	18.2951	4.19339	5.20239	0.895482	3.04894	5.73255	9.76155e-05	0.000586813	2.1754	1.75244	-1.24139	5.41843	5.51495	4.6738
CCDC121	2.52066	1.3338	5.58795	4.24646	4.9172	5.73149	9.7777e-05	0.000587503	4.30785	4.31537	4.11616	5.58116	5.55195	5.63073
TCF7L2	3.93535	1.97649	5.41551	3.42189	4.4187	5.72831	9.82639e-05	0.000590147	2.99852	3.65056	3.61659	5.37471	5.84808	5.02374
NEURL4	3.15846	1.65922	5.0795	3.40794	4.24372	5.72094	9.94016e-05	0.000596125	3.51936	3.42229	3.28217	5.18523	5.02953	5.02374
YIPF6	2.57574	1.36499	5.49318	4.13554	4.81436	5.71095	0.000100967	0.000602925	4.14739	4.07437	4.18487	5.41843	5.55195	5.50917
C19orf35	2.6991	1.43248	6.35484	4.91659	5.63571	5.70705	0.000101584	0.000605748	4.4057	5.28169	5.06239	6.17252	6.61449	6.2775
TMEM150A	2.00815	1.00587	6.91503	5.92666	6.42085	5.70483	0.000101938	0.000606807	5.84128	5.88546	6.05323	6.75322	6.8256	7.16628
MLANA	2.4811	1.31098	6.63384	5.32704	5.98044	5.70461	0.000101973	0.000606807	5.18921	5.1385	5.65343	6.83616	6.8256	6.23978
PDPK1	2.42874	1.28021	5.81015	4.53236	5.17126	5.70442	0.000102003	0.000606807	4.49733	4.55979	4.53997	5.9222	5.58802	5.92024
SLC25A11	2.40492	1.26599	6.41845	5.12149	5.76997	5.6965	0.000103276	0.00061206	5.36978	5.25879	4.73589	6.38576	6.64905	6.22054
SOWAHC	3.1945	1.67559	5.28944	3.59804	4.44374	5.67938	0.000106085	0.000626343	3.60424	3.90772	3.28217	5.1337	5.22545	5.50917
RAN	5.34504	2.4182	5.92093	3.43164	4.67629	5.67882	0.000106178	0.000626599	3.90123	4.17565	2.21804	5.54216	5.90638	6.31426
DAXX	3.4871	1.80203	5.34622	3.54352	4.44487	5.67477	0.000106856	0.000630305	3.90123	3.57841	3.15093	5.08026	5.27053	5.68787
AC005387.3	2.47111	1.30516	6.77929	5.50475	6.14202	5.6677	0.000108048	0.000636144	5.18921	5.23552	6.08952	6.92977	6.69938	6.70873
CCDC151	2.57199	1.36289	6.14527	4.77116	5.45822	5.66568	0.000108391	0.000637562	4.30785	5.1385	4.86713	6.24716	6.06835	6.12031
PPP1R15B	2.00893	1.00643	6.90514	5.89527	6.40021	5.65729	0.000109829	0.000645114	6.16845	5.8399	5.67747	6.78697	6.95553	6.97292
RPUSD1	22.9433	4.52	5.82391	1.22713	3.52552	5.64611	0.000111777	0.000654417	2.38185	2.54093	-1.24139	5.54216	5.47699	6.45258
ALG3	3.48744	1.80217	5.62547	3.80365	4.71456	5.64524	0.000111931	0.000655015	4.02955	3.57841	3.803	5.86013	5.90638	5.1099
TMEM63B	4.1674	2.05915	5.32043	3.25247	4.28645	5.63758	0.000113287	0.000661104	3.33294	3.57841	2.84607	4.77861	5.55195	5.63073
EXOSC7	3.30396	1.7242	5.27392	3.51232	4.39312	5.63278	0.000114148	0.000665512	3.60424	3.65056	3.28217	5.61913	5.1789	5.02374
SNHG17	6.45304	2.68998	4.99496	2.23028	3.61262	5.61959	0.000116544	0.000678537	2.56242	3.04789	1.08054	5.08026	4.67443	5.23019
IMP4	2.90411	1.5381	5.66368	4.09698	4.88033	5.61765	0.000116902	0.000680306	4.30785	4.27029	3.7128	5.8915	5.35669	5.74284
ARHGAP9	5.16719	2.36938	4.70916	2.30361	3.50638	5.61412	0.000117556	0.000683476	1.93439	3.04789	1.92853	4.70989	4.53357	4.88402
AC010890.1	2.66031	1.4116	5.51175	4.12277	4.81726	5.61239	0.000117876	0.000685022	4.02955	3.90772	4.43103	5.58116	5.47699	5.47711
PCID2	2.21985	1.15046	6.15388	5.02128	5.58758	5.6098	0.00011836	0.000687515	4.85	4.97951	5.23434	5.9817	6.25939	6.22054
AC015923.1	3.23848	1.69532	5.20251	3.55148	4.377	5.60178	0.000119867	0.000695307	3.51936	3.2472	3.88789	5.1337	5.02953	5.44432
AC025442.3	2.01762	1.01265	7.79596	6.80076	7.29836	5.59663	0.000120847	0.000700342	6.79237	6.43766	7.17224	7.80767	7.90994	7.67026
USP21	4.94056	2.30467	4.46575	2.16147	3.31361	5.5899	0.000122139	0.000706203	2.1754	2.38047	1.92853	4.21032	4.45762	4.72929
LIFR	2.98564	1.57804	6.87231	5.23401	6.05316	5.58813	0.000122483	0.000707865	5.63483	5.69389	4.37332	7.03182	6.73198	6.85312
INO80D	2.95165	1.56152	6.21413	4.63914	5.42663	5.58635	0.000122827	0.000709532	4.02955	4.97951	4.90835	6.31812	6.42808	5.89619
TRIP11	2.68595	1.42543	5.97739	4.50896	5.24317	5.57964	0.000124138	0.000715128	4.85	4.63286	4.04401	6.14676	6.04258	5.74284
ATP5D	3.59482	1.84592	4.94718	3.08409	4.01563	5.56267	0.00012752	0.000729928	2.99852	3.2472	3.00654	5.23498	4.67443	4.93211
CYB5R3	5.65272	2.49895	4.24325	1.73477	2.98901	5.55688	0.000128696	0.000735344	1.28232	1.99345	1.92853	4.39673	4.20236	4.13066
C19orf25	4.3653	2.12608	5.21301	3.16917	4.19109	5.54363	0.000131431	0.000747699	2.72289	2.81657	3.96806	4.90693	5.13081	5.60129
NFE2L2	2.17329	1.11988	6.11858	5.00354	5.56106	5.5422	0.000131729	0.000748907	5.04482	4.83217	5.13365	6.24716	6.11853	5.99006
NEIL2	2.91033	1.54118	5.71746	4.1971	4.95728	5.53449	0.000133353	0.00075711	3.68441	4.31537	4.5915	5.50209	5.93467	5.71562
LINC01024	2.60097	1.37905	5.54018	4.15404	4.84711	5.49668	0.000141623	0.000794733	4.25632	4.02093	4.18487	5.69219	5.62321	5.30515
BTBD9	2.57338	1.36366	5.8292	4.47961	5.1544	5.49527	0.000141943	0.000795815	4.25632	4.31537	4.86713	6.03884	5.81802	5.63073
TPGS1	3.53161	1.82033	5.25981	3.43466	4.34724	5.48771	0.000143665	0.000804752	2.99852	3.50246	3.803	5.41843	5.47699	4.88402
GPHN	3.67425	1.87745	4.73953	2.84646	3.79299	5.4821	0.000144957	0.000810035	2.72289	3.15099	2.6655	4.70989	4.67443	4.83426
ZNF764	2.4022	1.26436	6.40358	5.15271	5.77815	5.48185	0.000145014	0.000810035	4.98276	4.92236	5.55302	6.53225	6.57908	6.09941
ATG2B	2.77476	1.47236	5.19866	3.72155	4.4601	5.47562	0.000146463	0.00081677	3.60424	3.8476	3.7128	5.23498	5.13081	5.23019
HNRNPL	2.9523	1.56184	5.69472	4.10866	4.90169	5.46472	0.000149038	0.000830046	4.30785	4.40153	3.61659	5.65612	5.43799	5.99006
CDNF	2.69053	1.42789	6.42217	5.03476	5.72847	5.45391	0.000151637	0.000840793	4.62471	5.03447	5.44511	6.22271	6.19068	6.85312
NR4A1	8.18831	3.03357	4.20677	1.12611	2.66644	5.44874	0.000152899	0.000844917	1.28232	1.75244	0.34357	4.63774	3.77173	4.21083
MATN2	3.5782	1.83924	5.25437	3.45053	4.35245	5.44191	0.000154579	0.00085222	3.90123	2.93686	3.5135	4.90693	5.51495	5.34122
ST3GAL1	6.05144	2.59728	4.68385	2.00914	3.3465	5.44147	0.000154689	0.000852451	1.64489	2.81657	1.56596	5.02477	4.74002	4.28678
ARRDC3	2.70616	1.43625	6.1951	4.7827	5.4889	5.43874	0.000155367	0.000855787	4.70378	4.73595	4.90835	5.65612	6.57908	6.3501
MYBBP1A	2.51997	1.33341	6.65918	5.29464	5.97691	5.43742	0.000155696	0.000856871	5.41748	5.64173	4.8247	6.86804	6.28159	6.82792
GTF2A1	3.55371	1.82933	5.1143	3.2574	4.18585	5.43659	0.000155902	0.000857631	3.60424	3.50246	2.6655	4.90693	5.13081	5.30515
AC007383.3	2.72618	1.44688	5.53509	4.07535	4.80522	5.4357	0.000156124	0.00085784	3.96681	4.07437	4.18487	5.86013	5.47699	5.26816
PRKAR1B	2.78132	1.47577	5.56714	4.07336	4.82025	5.43562	0.000156145	0.00085784	4.02955	4.07437	4.11616	5.69219	5.81802	5.1912
DCUN1D2	3.89935	1.96323	4.89738	2.93834	3.91786	5.4351	0.000156276	0.000858185	2.38185	3.15099	3.28217	5.1337	4.67443	4.88402
LINC00334	10.6531	3.4132	4.10885	0.74694	2.4279	5.39944	0.000165484	0.00090127	0.059924	1.10036	1.08054	3.60027	3.89202	4.83426
ZNF304	14.4594	3.85394	3.13169	-0.717165	1.20726	5.3936	0.000167045	0.000907416	-1.52504	0.614935	-1.24139	3.05278	2.94861	3.39369
IER3	3.76896	1.91417	4.98455	3.09211	4.03833	5.38203	0.000170185	0.000921682	2.72289	2.93686	3.61659	5.32962	4.74002	4.88402
VPS45	2.49645	1.31988	6.61621	5.30257	5.95939	5.38044	0.000170622	0.000923256	5.04482	5.1385	5.72439	6.88372	6.76387	6.20105
ADM2	17.1987	4.10423	3.12761	-0.962821	1.08239	5.37499	0.000172127	0.000930594	-1.52504	-1.70699	0.34357	3.4398	2.41809	3.52494
HOTTIP	12.7067	3.66751	3.70004	0.0568107	1.87842	5.37106	0.000173221	0.00093454	-1.52504	0.614935	1.08054	3.74466	3.49609	3.85935
NR2F1	2.06804	1.04826	6.56548	5.51036	6.03792	5.36273	0.000175562	0.000944295	5.50838	5.60589	5.41682	6.34103	6.87022	6.48519
ASH1L	2.1207	1.08454	6.62231	5.53139	6.07685	5.36038	0.00017623	0.000947075	5.5939	5.64173	5.35852	6.77019	6.28159	6.81515
RIBC1	2.07921	1.05604	6.2598	5.22293	5.74137	5.34502	0.000180656	0.00096714	5.16146	5.03447	5.47285	6.17252	6.36711	6.23978
PCSK7	2.23114	1.15778	6.04698	4.87245	5.45972	5.34206	0.000181521	0.000970532	4.81481	5.11319	4.68935	5.8915	6.23685	6.0126
RPL29	4.50791	2.17246	5.31491	3.13022	4.22256	5.32699	0.000185999	0.000991521	3.68441	3.2472	2.45905	5.23498	4.86288	5.84686
FAM132A	10.0818	3.33368	4.67682	1.3273	3.00206	5.31892	0.000188445	0.0010021	1.64489	1.99345	0.34357	3.8759	5.13081	5.02374
PTCH1	2.40624	1.26678	6.23789	4.99977	5.61883	5.31887	0.000188461	0.0010021	4.70378	4.76874	5.52679	6.24716	6.36711	6.09941
WDR5	2.75268	1.46084	5.32278	3.88713	4.60495	5.31767	0.000188826	0.00100319	3.96681	3.57841	4.11616	5.18523	5.51495	5.26816
EEF1A1	2.54316	1.34662	5.37211	4.00619	4.68915	5.31641	0.000189214	0.0010044	4.08967	4.1259	3.803	5.46086	5.31426	5.34122
GPBP1L1	3.21637	1.68544	5.50229	3.77948	4.64088	5.30773	0.000191892	0.00101647	4.4057	3.65056	3.28217	5.61913	5.65756	5.23019
STIP1	2.17189	1.11895	7.41199	6.26857	6.84028	5.30709	0.000192093	0.00101711	6.53566	6.54567	5.72439	7.24108	7.53819	7.4567
FAM21A	6.84553	2.77516	3.83201	1.02961	2.43081	5.29171	0.000196945	0.00103668	1.28232	1.46293	0.34357	3.74466	3.89202	3.85935
WFIKKN1	2.10697	1.07517	7.84587	6.79879	7.32233	5.28749	0.000198299	0.00104207	6.62978	6.66369	7.1029	7.41304	7.96584	8.15872
TTLL10	13.517	3.7567	2.79305	-0.962821	0.915112	5.28477	0.000199178	0.00104537	0.059924	-1.70699	-1.24139	3.05278	2.41809	2.90826
EVI2A	2.57601	1.36514	5.97567	4.62585	5.30076	5.28381	0.000199487	0.00104656	4.9179	4.27029	4.68935	6.24716	5.62321	6.05666
FAM211B	4.99648	2.32091	4.1681	1.83127	2.99968	5.28108	0.000200375	0.00105078	1.93439	1.99345	1.56596	3.9962	4.37745	4.13066
ZCCHC3	3.56888	1.83547	4.91027	3.09211	4.00119	5.2667	0.000205114	0.00107249	3.33294	2.93686	3.00654	4.96705	4.53357	5.23019
ACTL7A	4.77804	2.25642	4.34688	2.08113	3.21401	5.26293	0.000206377	0.00107776	1.93439	2.38047	1.92853	4.48162	4.00305	4.55596
C9orf53	3.01653	1.59289	5.6968	4.15836	4.92758	5.25107	0.0002104	0.00109649	4.02955	3.57841	4.86713	5.79528	5.7239	5.57123
AC009095.4	2.19163	1.132	6.17207	5.02698	5.59952	5.24654	0.000211959	0.00110141	5.13317	4.92236	5.02539	6.40762	6.23685	5.87174
MYEOV	6.64903	2.73314	4.13235	1.39612	2.76424	5.2376	0.000215071	0.00111528	0.79689	1.46293	1.92853	4.10723	4.53357	3.75626
TNFAIP3	16.1095	4.00984	3.00675	-0.962821	1.02197	5.23221	0.000216968	0.00112419	0.059924	-1.70699	-1.24139	2.1597	3.33563	3.52494
FAM27A	10.883	3.44401	3.72419	0.21862	1.9714	5.22969	0.000217862	0.00112697	1.28232	0.614935	-1.24139	3.8759	3.77173	3.52494
MAD2L1BP	4.3696	2.1275	4.46849	2.32679	3.39764	5.22484	0.000219593	0.00113266	2.56242	2.1999	2.21804	4.84419	4.20236	4.35893
FAM179B	11.3808	3.50853	3.88235	0.339476	2.11091	5.22446	0.00021973	0.00113279	1.64489	0.614935	-1.24139	3.74466	3.77173	4.13066
KLF10	9.40719	3.23376	4.45804	1.27526	2.86665	5.22427	0.000219799	0.00113279	0.79689	1.10036	1.92853	4.70989	3.64048	5.02374
TMEM231	7.46774	2.90067	3.87432	0.992596	2.43346	5.21534	0.000223028	0.00114755	0.79689	0.614935	1.56596	3.60027	4.37745	3.64523
KLF7	4.83144	2.27245	4.20117	1.95212	3.07665	5.20572	0.000226563	0.00116288	2.1754	1.75244	1.92853	4.10723	4.00305	4.49323
AC000099.1	14.9559	3.90264	2.43468	-1.49114	0.471771	5.20109	0.000228286	0.00117011	-1.52504	-1.70699	-1.24139	2.1597	3.33563	1.80873
TFAP4	2.4721	1.30573	5.36569	4.05505	4.71037	5.20108	0.00022829	0.00117011	4.25632	4.02093	3.88789	5.32962	5.35669	5.41076
RABGGTB	8.16574	3.02958	5.28719	2.17009	3.72864	5.18381	0.000234837	0.00119898	3.22985	2.93686	0.34357	4.96705	5.1789	5.71562
RPL13A	4.2466	2.08631	5.69952	3.56538	4.63245	5.17335	0.000238895	0.00121723	3.76036	4.27029	2.6655	5.46086	5.39791	6.23978
RBM3	3.06276	1.61483	5.24525	3.59523	4.42024	5.16607	0.000241766	0.00122937	3.42916	4.07437	3.28217	5.41843	4.97609	5.34122
CNOT8	3.49611	1.80575	4.70477	2.88876	3.79676	5.1527	0.00024713	0.00125259	2.72289	2.93686	3.00654	5.02477	4.53357	4.55596
CD81	3.47447	1.79679	5.4005	3.63039	4.51544	5.14868	0.000248767	0.00125784	2.86728	3.90772	4.11616	5.46086	5.08106	5.65958
EIF3F	4.36602	2.12632	4.67507	2.57244	3.62376	5.14291	0.00025114	0.0012678	1.93439	2.93686	2.84607	4.30654	4.74002	4.97865
LECT1	5.43463	2.44218	4.30928	1.90008	3.10468	5.13543	0.000254247	0.00127989	1.28232	2.1999	2.21804	3.9962	4.20236	4.72929
OPHN1	11.0609	3.4674	4.27155	0.718644	2.4951	5.13125	0.000256001	0.00128614	1.93439	1.46293	-1.24139	4.48162	4.20236	4.13066
TSC22D1	3.40929	1.76947	5.26324	3.44854	4.35589	5.1302	0.000256447	0.00128736	3.83251	3.8476	2.6655	5.1337	5.1789	5.47711
AC079145.4	12.0203	3.5874	2.08789	-1.49114	0.298372	5.10801	0.000265994	0.00132786	-1.52504	-1.70699	-1.24139	1.67427	2.41809	2.1713
CTXN1	9.93832	3.313	3.6202	0.339476	1.97984	5.10514	0.000267256	0.00133257	0.059924	0.614935	0.34357	2.81177	4.00305	4.04577
DNAJB12	2.12289	1.08603	6.32883	5.27589	5.80236	5.10148	0.000268874	0.00133875	5.29514	4.97951	5.55302	6.2712	6.16703	6.54827
RPL8	4.74827	2.2474	6.4689	4.10658	5.28774	5.09776	0.000270527	0.00134569	4.54105	5.11319	2.6655	6.68326	6.04258	6.68085
SF1	2.65822	1.41046	5.92158	4.46657	5.19407	5.09776	0.000270531	0.00134569	4.70378	4.89292	3.803	5.79528	5.93467	6.0348
DUS2	2.21401	1.14666	6.20301	5.04051	5.62176	5.09481	0.000271849	0.00135012	5.01412	5.32643	4.78098	5.9222	6.42808	6.25876
FOS	11.6899	3.54719	4.54777	0.895482	2.72163	5.08893	0.000274504	0.00136099	1.93439	1.99345	-1.24139	4.90693	4.37745	4.35893
ZNF281	7.02764	2.81304	4.93636	2.03812	3.48724	5.08852	0.000274688	0.00136099	3.22985	2.54093	0.34357	4.77861	4.92059	5.1099
ZXDB	2.06617	1.04696	6.41122	5.39525	5.90323	5.08207	0.000277631	0.00137395	5.32045	5.21187	5.65343	6.2712	6.28159	6.68085
CDKN2AIP	4.29875	2.10392	4.60015	2.47594	3.53805	5.07916	0.00027897	0.00137948	3.11882	2.38047	1.92853	4.77861	4.29256	4.72929
CTAGE5	3.20266	1.67927	5.65844	3.96844	4.81344	5.06239	0.000286817	0.00141662	3.68441	3.90772	4.3132	5.8915	6.01635	5.06746
CCL17	12.6973	3.66645	2.18439	-1.49114	0.346623	5.0577	0.000289052	0.00142709	-1.52504	-1.70699	-1.24139	2.81177	1.57009	2.1713
WDR7	4.59528	2.20015	4.39417	2.21496	3.30456	5.03915	0.000298076	0.00146532	2.72289	1.99345	1.92853	4.10723	4.29256	4.78273
DHCR7	3.00771	1.58867	5.20963	3.58629	4.39796	5.03566	0.000299805	0.00147209	3.76036	3.8476	3.15093	4.96705	5.55195	5.1099
GAA	3.1582	1.6591	4.71157	3.06887	3.89022	5.02197	0.000306698	0.00150359	2.86728	2.93686	3.40246	4.77861	4.74002	4.61608
RPL6	4.78627	2.2589	6.06317	3.70241	4.88279	5.01875	0.000308344	0.00151021	4.25632	4.63286	2.21804	5.95225	5.81802	6.41923
PIM1	4.26846	2.09372	4.19077	2.10128	3.14602	5.00873	0.000313517	0.00153105	2.38185	1.99345	1.92853	4.21032	4.00305	4.35893
ZNF830	5.61699	2.4898	3.9379	1.4521	2.695	4.99928	0.000318486	0.00155049	2.1754	1.10036	1.08054	3.8759	3.89202	4.04577
TRMT1	2.39741	1.26148	5.48782	4.23045	4.85914	4.99276	0.000321959	0.00156409	4.54105	3.96543	4.18487	5.58116	5.43799	5.44432
RPL35	2.51352	1.32971	7.38701	6.01228	6.69964	4.98816	0.000324436	0.00157458	6.27586	6.52663	5.23434	7.5471	7.14903	7.4649
MPHOSPH9	2.06574	1.04666	6.45242	5.4104	5.93141	4.98434	0.000326511	0.0015822	5.67463	5.25879	5.29777	6.17252	6.71577	6.46898
ACAT1	2.01159	1.00834	6.35761	5.33695	5.84728	4.97746	0.000330276	0.0015986	5.16146	5.43256	5.41682	6.62846	6.30345	6.14092
CALHM1	2.60994	1.38402	5.40275	3.98928	4.69601	4.96575	0.000336787	0.00162636	3.68441	4.31537	3.96806	5.54216	5.51495	5.15112
HNRNPH1	2.59521	1.37585	7.60353	6.19476	6.89914	4.96268	0.000338516	0.0016322	6.46931	6.69815	5.41682	7.56666	7.30886	7.93506
ID3	2.56228	1.35743	5.58122	4.20264	4.89193	4.9622	0.000338791	0.0016329	3.90123	4.52183	4.18487	5.46086	5.90638	5.37641
VPS11	3.89104	1.96016	4.28387	2.32679	3.30533	4.95879	0.000340721	0.00163969	2.56242	2.1999	2.21804	4.10723	4.45762	4.28678
PPP1R13L	3.90269	1.96447	4.83262	2.85305	3.84283	4.95131	0.000345005	0.0016565	2.72289	2.68532	3.15093	5.23498	4.97609	4.28678
KCNB1	12.3484	3.62626	2.67219	-0.962821	0.854684	4.94823	0.000346784	0.00166314	-1.52504	-0.122031	-1.24139	3.25923	2.05552	2.70181
LIN9	3.42833	1.77751	4.96066	3.17725	4.06896	4.93654	0.000353632	0.00169146	3.22985	3.15099	3.15093	4.63774	5.51495	4.72929
SFXN2	7.8289	2.96881	3.93224	0.964299	2.44827	4.92379	0.000361256	0.00172334	0.79689	1.75244	0.34357	3.74466	3.49609	4.55596
C16orf96	11.6022	3.53632	3.70868	0.21862	1.96365	4.91219	0.000368343	0.00175249	-1.52504	0.614935	1.56596	3.74466	3.33563	4.04577
ATXN2	3.11021	1.63701	5.09771	3.42438	4.26105	4.90934	0.000370112	0.00176024	3.51936	3.90772	2.84607	4.90693	5.08106	5.30515
RNF145	3.19937	1.67779	5.04181	3.36455	4.20318	4.90707	0.00037152	0.00176515	3.33294	3.2472	3.5135	4.84419	5.55195	4.72929
TNPO2	2.76552	1.46755	5.6032	4.10548	4.85434	4.89766	0.000377431	0.00178794	3.90123	4.7024	3.7128	5.46086	5.47699	5.87174
PURB	3.71765	1.89439	4.28011	2.38698	3.33354	4.89496	0.000379148	0.0017949	2.56242	2.38047	2.21804	4.21032	4.20236	4.42764
PIGV	6.18713	2.62927	4.34229	1.63315	2.98772	4.88827	0.000383427	0.00181259	2.1754	2.38047	0.34357	4.56179	4.10615	4.35893
COPG2	2.01722	1.01237	6.83604	5.82241	6.32922	4.88146	0.00038784	0.00183139	6.09701	5.49268	5.87755	7.0597	6.88479	6.56362
ZNF524	5.51753	2.46402	4.1758	1.74979	2.9628	4.87235	0.000393823	0.00185476	0.79689	1.99345	2.45905	3.8759	4.29256	4.35893
DUSP1	6.02489	2.59093	3.87841	1.24696	2.56269	4.86734	0.000397156	0.00186696	1.93439	1.46293	0.34357	3.8759	4.00305	3.75626
NDUFB3	3.11403	1.63878	4.82141	3.22409	4.02275	4.86494	0.000398765	0.00187268	3.11882	2.93686	3.61659	4.90693	4.53357	5.02374
ZFP36L1	2.59652	1.37658	5.35947	3.98122	4.67034	4.85806	0.000403409	0.00188929	3.68441	4.07437	4.18487	5.69219	5.08106	5.30515
CEP63	2.0347	1.02481	6.06688	5.03527	5.55108	4.85535	0.000405248	0.00189649	5.16146	5.16337	4.78098	5.95225	5.98963	6.25876
ATP5G3	2.18698	1.12894	5.67858	4.54843	5.1135	4.8446	0.00041266	0.00192687	4.58349	4.52183	4.53997	5.50209	5.96241	5.57123
B3GALT6	4.04718	2.01692	4.21495	2.16147	3.18821	4.8415	0.000414822	0.00193481	2.1754	2.38047	1.92853	4.39673	4.29256	3.95557
MECP2	2.54745	1.34905	5.57375	4.17105	4.8724	4.83229	0.000421314	0.00196218	4.3576	4.44275	3.7128	5.82807	5.58802	5.30515
LPP	2.22021	1.1507	6.185	5.00734	5.59617	4.82097	0.000429438	0.00199116	4.66479	5.36982	4.98743	6.47128	6.09366	5.99006
PRAM1	4.39756	2.1367	4.18145	2.04863	3.11504	4.81977	0.000430312	0.00199448	1.93439	1.99345	2.21804	4.56179	3.77173	4.21083
CCT8	2.90646	1.53926	5.90997	4.30235	5.10616	4.81275	0.000435443	0.00201011	4.70378	4.8008	3.40246	6.03884	5.7239	5.96716
NXPE4	12.6625	3.66249	2.65716	-0.962821	0.847169	4.81224	0.000435814	0.00201034	0.059924	-1.70699	-1.24139	2.1597	2.41809	3.39369
HIST2H2AB	2.08718	1.06155	5.70638	4.64209	5.17423	4.80388	0.000442018	0.00203374	4.70378	4.73595	4.48653	5.58116	5.69111	5.84686
ZNF408	6.76135	2.75731	3.73698	0.964299	2.35064	4.7942	0.000449314	0.00206052	0.79689	1.75244	0.34357	3.74466	3.33563	4.13066
TMEM60	2.9634	1.56726	4.78659	3.21606	4.00133	4.79292	0.000450289	0.00206348	2.99852	3.2472	3.40246	5.08026	4.60572	4.6738
TTC24	2.61917	1.38911	5.27247	3.90563	4.58905	4.78859	0.000453603	0.00207489	4.02955	3.50246	4.18487	5.23498	5.51495	5.06746
SDE2	4.99774	2.32128	4.00927	1.64177	2.82552	4.77507	0.000464106	0.00211754	1.64489	2.1999	1.08054	3.8759	4.29256	3.85935
SLC9A3R2	2.09283	1.06545	5.57118	4.50833	5.03975	4.77182	0.000466674	0.00212771	4.58349	4.40153	4.53997	5.58116	5.62321	5.50917
BCAS4	10.3387	3.36999	3.71251	0.339476	2.02599	4.77008	0.000468054	0.00213168	-1.52504	1.46293	1.08054	3.60027	3.89202	3.64523
ZDHHC11B	10.0566	3.33007	3.15238	-0.188845	1.48177	4.75619	0.000479211	0.00217383	-1.52504	0.614935	0.34357	3.05278	3.49609	2.90826
RNF151	10.5889	3.40448	3.88733	0.380429	2.13388	4.75544	0.000479824	0.00217583	1.28232	1.10036	-1.24139	4.30654	4.10615	3.2493
TRIB1	11.8179	3.5629	4.23567	0.622142	2.42891	4.75407	0.000480937	0.0021793	1.64489	1.46293	-1.24139	4.48162	3.49609	4.72929
NRBP2	2.85919	1.51561	5.00546	3.5094	4.25743	4.74374	0.000489451	0.00221469	3.96681	3.04789	3.5135	4.90693	5.13081	4.97865
ZNF778	13.6792	3.77391	3.22923	-0.555356	1.33694	4.74168	0.000491166	0.00221925	-1.52504	1.10036	-1.24139	2.52227	3.77173	3.39369
EIF4G2	3.0207	1.59488	7.32048	5.65396	6.48722	4.73071	0.000500412	0.00225454	6.15444	6.32091	4.48653	7.31234	7.33032	7.31879
GLYAT	6.73236	2.75111	3.67241	0.908749	2.29058	4.72898	0.000501883	0.00225874	0.059924	1.10036	1.56596	3.9962	3.77173	3.2493
RPPH1	5.53945	2.46974	6.96915	4.35636	5.66275	4.72677	0.000503772	0.002264	4.95069	5.65933	2.45905	7.04583	6.56105	7.30058
ATAD3A	2.79463	1.48266	5.48178	4.00825	4.74501	4.71295	0.000515767	0.0023113	4.14739	4.07437	3.803	5.50209	4.97609	5.96716
BRD4	2.81611	1.4937	5.63457	4.0699	4.85224	4.71201	0.000516594	0.00231335	4.4057	4.40153	3.40246	6.01055	5.55195	5.34122
PANK2	3.04508	1.60648	4.65072	3.05202	3.85137	4.69512	0.000531681	0.00237415	2.99852	3.15099	3.00654	4.30654	4.86288	4.78273
RD3L	2.91508	1.54354	4.66314	3.10771	3.88542	4.68266	0.000543102	0.00241999	3.42916	3.04789	2.84607	4.70989	4.60572	4.6738
AP000640.10	3.77258	1.91555	4.71157	2.83515	3.77336	4.68226	0.000543476	0.0024208	3.22985	1.99345	3.28217	4.96705	4.67443	4.49323
FTL	2.92953	1.55067	6.37055	4.73522	5.55289	4.65041	0.000573878	0.00253199	4.77874	5.62392	3.803	6.40762	6.40804	6.29599
OSBPL3	4.37281	2.12856	4.77918	2.62722	3.7032	4.64927	0.000575002	0.00253606	2.1754	3.2472	2.45905	4.21032	5.39791	4.72929
HNRNPA1	5.79745	2.53542	4.78929	2.17009	3.47969	4.64283	0.000581376	0.00255879	2.38185	3.04789	1.08054	5.28308	4.10615	4.97865
CRAMP1L	4.85034	2.27809	3.88149	1.57296	2.72722	4.63418	0.000590052	0.00259515	2.1754	1.46293	1.08054	3.9962	4.00305	3.64523
ABCE1	2.69668	1.43118	4.82158	3.37787	4.09973	4.62991	0.000594383	0.00261238	3.42916	3.42229	3.28217	4.70989	5.08106	4.6738
SOX18	14.2503	3.83292	3.18548	-0.717165	1.23416	4.61605	0.000608683	0.00266776	-1.52504	0.614935	-1.24139	3.74466	3.64048	2.1713
SOD1	2.25054	1.17027	6.48213	5.2573	5.86971	4.61481	0.000609981	0.00267159	5.24315	5.79285	4.73589	6.60973	6.5969	6.23978
GADD45A	10.5131	3.39412	4.58428	1.11345	2.84887	4.61437	0.00061044	0.00267267	2.38185	2.1999	-1.24139	4.10723	4.86288	4.78273
USP36	2.72705	1.44734	5.10058	3.63325	4.36691	4.6135	0.000611346	0.00267538	4.02955	3.71927	3.15093	5.1337	4.86288	5.30515
PRPF8	3.39532	1.76355	6.25278	4.38025	5.31651	4.60417	0.000621223	0.00270856	4.4057	5.45288	3.28217	6.45037	6.16703	6.14092
FAM183A	20.5443	4.36067	2.95642	-1.49114	0.732638	4.59218	0.00063415	0.00276013	-1.52504	-1.70699	-1.24139	3.4398	4.10615	1.3233
GABARAP	10.9321	3.45049	3.6903	0.339476	2.01489	4.58769	0.000639063	0.00277767	0.79689	-1.70699	1.92853	3.4398	3.77173	3.85935
SPATA2	10.2431	3.35658	2.64389	-0.717165	0.963363	4.58634	0.000640555	0.00278319	-1.52504	0.614935	-1.24139	2.52227	2.7076	2.70181
PGP	2.29798	1.20036	5.65069	4.46178	5.05624	4.58089	0.000646582	0.00280359	4.08967	4.55979	4.73589	5.41843	5.96241	5.57123
PCAT1	15.0867	3.91521	3.26872	-0.717165	1.27577	4.56401	0.000665651	0.00287633	-1.52504	0.614935	-1.24139	4.39673	2.94861	2.4608
RFTN2	2.03001	1.02149	6.03402	5.00183	5.51793	4.56349	0.000666243	0.0028779	5.01412	4.89292	5.09846	6.2712	6.14298	5.68787
RPL3	2.7704	1.4701	6.42781	4.91949	5.67365	4.55869	0.00067178	0.00289485	5.26938	5.30423	4.18487	6.59075	5.87752	6.81515
RPSA	5.59754	2.48479	4.49542	1.91726	3.20634	4.55791	0.000672677	0.00289772	2.72289	2.68532	0.34357	4.39673	4.53357	4.55596
DHRS7B	2.00843	1.00607	5.57315	4.56187	5.06751	4.55426	0.000676926	0.00291403	4.49733	4.59679	4.5915	5.61913	5.62321	5.47711
AF127577.11	2.8606	1.51632	4.72625	3.221	3.97363	4.55099	0.000680749	0.00292848	3.33294	3.04789	3.28217	4.96705	4.37745	4.83426
ZNF788	3.29676	1.72105	4.37054	2.65278	3.51166	4.53565	0.000699007	0.00299472	2.1754	2.93686	2.84607	4.30654	4.37745	4.42764
EGFLAM	3.18404	1.67086	4.52214	2.89679	3.70947	4.53454	0.000700349	0.00299843	2.86728	2.54093	3.28217	4.21032	4.74002	4.61608
KRT18	2.17989	1.12426	7.6608	6.50867	7.08473	4.53146	0.000704091	0.00301342	6.80139	6.8892	5.83542	7.73172	7.35145	7.89922
PPAN	11.1972	3.48506	2.55554	-0.962821	0.79636	4.53125	0.000704338	0.00301345	-1.52504	-0.122031	-1.24139	2.52227	3.33563	1.80873
MROH2A	3.67396	1.87734	4.44338	2.55249	3.49794	4.53087	0.000704806	0.00301443	2.99852	2.1999	2.45905	4.48162	4.80276	4.04577
C14orf105	8.97832	3.16645	2.71271	-0.4345	1.1391	4.52443	0.000712683	0.00304191	-1.52504	-0.122031	0.34357	2.52227	2.7076	2.90826
MIOX	11.3991	3.51085	2.78587	-0.717165	1.03435	4.50991	0.000730803	0.00311185	-1.52504	0.614935	-1.24139	3.05278	2.05552	3.2493
AC006273.4	4.22916	2.08037	4.05596	2.02094	3.03845	4.49934	0.000744295	0.00315788	1.64489	1.75244	2.6655	3.74466	4.37745	4.04577
NFKB2	4.01874	2.00674	5.07218	3.01175	4.04196	4.4992	0.000744466	0.00315788	3.68441	3.42229	1.92853	5.1337	4.60572	5.47711
TUFM	2.88062	1.52638	5.71389	4.12198	4.91793	4.4893	0.000757349	0.00320211	3.90123	4.95122	3.5135	5.9222	5.39791	5.82155
NDUFAF2	2.25552	1.17346	5.30875	4.13348	4.72111	4.48864	0.000758212	0.00320468	4.30785	3.90772	4.18487	5.50209	5.31426	5.1099
KCNQ1DN	9.22402	3.2054	2.2497	-0.962821	0.643437	4.48457	0.00076358	0.00322195	-1.52504	-0.122031	-1.24139	2.52227	2.05552	2.1713
MADCAM1	2.69191	1.42863	4.76208	3.35153	4.05681	4.48123	0.000768013	0.00323631	3.11882	3.42229	3.5135	4.48162	4.92059	4.88402
CBFA2T3	9.73612	3.28335	1.80522	-1.49114	0.15704	4.47847	0.000771691	0.00324312	-1.52504	-1.70699	-1.24139	1.67427	2.41809	1.3233
STMND1	9.73612	3.28335	1.80522	-1.49114	0.15704	4.47847	0.000771691	0.00324312	-1.52504	-1.70699	-1.24139	1.67427	2.41809	1.3233
ZCCHC8	6.41352	2.68112	3.43114	0.718644	2.07489	4.47722	0.00077336	0.00324904	0.059924	1.75244	0.34357	3.25923	3.64048	3.39369
SSNA1	2.83164	1.50164	5.43185	3.90684	4.66934	4.47261	0.00077957	0.00327185	4.02955	4.07437	3.61659	5.8915	4.80276	5.60129
MAPK11	11.6967	3.54803	3.4982	0.0568107	1.77751	4.46562	0.000789086	0.00330737	0.79689	-1.70699	1.08054	3.25923	2.94861	4.28678
PNP	4.38855	2.13375	4.40128	2.20666	3.30397	4.4546	0.000804325	0.00336452	2.72289	2.81657	1.08054	4.21032	4.37745	4.61608
CLTCL1	2.93487	1.5533	5.04782	3.49148	4.26965	4.45264	0.000807072	0.00337376	3.60424	3.71927	3.15093	4.48162	5.35669	5.30515
NHP2L1	2.73501	1.45155	4.84229	3.3681	4.10519	4.43825	0.000827508	0.0034443	3.51936	3.57841	3.00654	4.56179	5.13081	4.83426
ZNF292	3.77298	1.9157	4.18489	2.21105	3.19797	4.43357	0.00083427	0.00347014	2.38185	2.68532	1.56596	4.30654	4.20236	4.04577
UBE2J2	12.2717	3.61726	4.55825	0.895482	2.72687	4.43076	0.000838355	0.00348428	1.93439	1.99345	-1.24139	4.56179	3.77173	5.34122
ATP6V0A1	2.89076	1.53145	4.50499	2.96014	3.73257	4.42752	0.000843096	0.0034976	2.72289	3.15099	3.00654	4.70989	4.37745	4.42764
LCN2	9.55046	3.25557	3.23865	-0.0270356	1.60581	4.42646	0.000844645	0.00350253	0.059924	1.10036	-1.24139	2.81177	2.94861	3.95557
C5orf56	3.16963	1.66432	4.6439	2.97843	3.81117	4.42633	0.000844842	0.00350253	2.38185	3.15099	3.40246	4.70989	4.86288	4.35893
SUN1	3.59585	1.84633	4.60995	2.70078	3.65537	4.42098	0.000852739	0.00352944	2.38185	3.50246	2.21804	4.48162	4.92059	4.42764
TNFRSF13C	10.2944	3.36379	1.90172	-1.49114	0.205291	4.41801	0.00085716	0.00354424	-1.52504	-1.70699	-1.24139	2.81177	1.57009	1.3233
MOCS3	9.58067	3.26013	2.28089	-0.962821	0.659035	4.41048	0.000868483	0.00358685	-1.52504	-0.122031	-1.24139	1.67427	2.7076	2.4608
ANHX	10.7497	3.42622	1.89821	-1.49114	0.203536	4.40113	0.000882745	0.0036333	-1.52504	-1.70699	-1.24139	0.937303	2.05552	2.70181
AMD1	5.43164	2.44139	4.50499	1.94762	3.22631	4.39668	0.000889621	0.00365681	2.56242	2.93686	0.34357	4.48162	4.67443	4.35893
GLTSCR2	3.93421	1.97607	4.128	2.10943	3.11872	4.38411	0.000909355	0.00372211	2.38185	2.38047	1.56596	4.48162	3.77173	4.13066
ABHD3	4.09079	2.03238	4.75565	2.6614	3.70853	4.38309	0.00091097	0.00372629	2.38185	2.93686	2.6655	5.41843	4.80276	4.04577
RPS2	4.12679	2.04502	5.51416	3.357	4.43558	4.37919	0.000917193	0.00374565	3.96681	4.17565	1.92853	5.86013	5.08106	5.60129
LINC00162	3.64663	1.86657	3.97921	2.12896	3.05408	4.37822	0.000918741	0.00375067	1.93439	1.99345	2.45905	3.8759	4.20236	3.85935
TMEM201	7.84052	2.97095	2.54739	-0.4345	1.05645	4.36753	0.00093607	0.00381283	0.059924	-0.122031	-1.24139	2.52227	2.41809	2.70181
LINC00313	7.73862	2.95208	3.39255	0.501285	1.94692	4.36542	0.000939523	0.00382442	1.28232	-0.122031	0.34357	2.81177	3.15506	4.21083
GNL1	2.25968	1.17612	5.58795	4.39754	4.99274	4.36364	0.000942447	0.00383097	4.70378	4.17565	4.3132	5.65612	5.87752	5.23019
APOBEC3C	8.93728	3.15984	1.68436	-1.49114	0.0966112	4.36353	0.000942627	0.00383097	-1.52504	-1.70699	-1.24139	2.1597	1.57009	1.3233
GABARAPL1	2.34339	1.2286	5.13085	3.88973	4.51029	4.35588	0.000955326	0.0038712	3.60424	4.02093	4.04401	5.28308	5.22545	4.88402
FAM222A	2.28922	1.19485	5.35766	4.15569	4.75667	4.34295	0.000977182	0.00394577	3.76036	4.52183	4.18487	5.18523	5.47699	5.41076
RUFY3	3.03853	1.60337	4.87973	3.30583	4.09278	4.34027	0.000981782	0.0039618	3.42916	2.68532	3.803	5.28308	4.74002	4.61608
PPP1R16B	9.50004	3.24793	3.02367	-0.188845	1.41741	4.32719	0.00100453	0.00403965	-1.52504	-0.122031	1.08054	2.52227	3.64048	2.90826
RPL15	2.45546	1.296	5.54619	4.26179	4.90399	4.32117	0.00101518	0.00407435	4.70378	3.96543	4.11616	5.76173	5.08106	5.79579
AMPD1	9.45924	3.24172	2.26472	-0.962821	0.650952	4.31941	0.00101832	0.00408434	-1.52504	-0.122031	-1.24139	2.52227	1.57009	2.70181
FAIM3	8.96984	3.16508	2.18439	-0.962821	0.610784	4.31586	0.00102468	0.00410853	-1.52504	-0.122031	-1.24139	1.67427	2.41809	2.4608
LPPR3	2.45852	1.29779	5.35968	4.0991	4.72939	4.3143	0.00102749	0.00411587	4.4057	3.57841	4.3132	5.08026	5.65756	5.34122
ZDHHC5	2.06366	1.04521	5.97196	4.90012	5.43604	4.31245	0.00103083	0.00412793	4.98276	4.89292	4.8247	6.40762	5.87752	5.63073
TRIP12	3.73081	1.89949	6.33133	4.3094	5.32037	4.30978	0.00103566	0.00414464	5.07487	5.00725	2.84607	6.31812	6.73198	5.94389
ANKRD13C	2.90012	1.53611	4.54718	3.01051	3.77884	4.30743	0.00103995	0.00415782	3.42916	2.93686	2.6655	4.30654	4.60572	4.72929
RUNDC1	4.26399	2.0922	3.77586	1.66946	2.72266	4.3069	0.00104092	0.00416038	2.1754	1.75244	1.08054	3.60027	3.77173	3.95557
SRM	7.83198	2.96938	3.65191	0.622142	2.13702	4.30321	0.00104769	0.00418609	1.64489	1.46293	-1.24139	3.60027	3.49609	3.85935
LINC00423	10.7586	3.42742	1.93873	-1.49114	0.223796	4.30234	0.00104929	0.00418983	-1.52504	-1.70699	-1.24139	2.81177	0.833129	2.1713
FNBP1L	3.34723	1.74297	4.95664	3.15554	4.05609	4.29735	0.00105852	0.00422131	3.76036	3.2472	2.45905	5.50209	4.53357	4.83426
SETD7	2.19124	1.13175	5.3196	4.15346	4.73653	4.29562	0.00106174	0.00423149	4.08967	4.48283	3.88789	5.32962	5.43799	5.1912
RPL17	9.1294	3.19052	2.92289	-0.188845	1.36702	4.29458	0.00106368	0.00423653	0.059924	-1.70699	1.08054	2.81177	2.7076	3.2493
CDK9	3.75943	1.91051	4.73105	2.76733	3.74919	4.29117	0.00107007	0.00425658	2.72289	3.65056	1.92853	4.30654	4.86288	5.02374
SFSWAP	4.08505	2.03035	5.02948	2.90118	3.96533	4.28421	0.00108323	0.00430075	3.22985	3.90772	1.56596	5.08026	4.74002	5.26816
RHOB	2.26956	1.18242	5.99467	4.7642	5.37943	4.27765	0.0010958	0.00434655	4.85	5.32643	4.11616	5.9222	5.96241	6.09941
RPS15A	6.01357	2.58822	4.4567	1.77529	3.11599	4.27636	0.00109828	0.00435365	1.64489	3.3374	0.34357	4.10723	4.53357	4.72929
ADM	2.59155	1.37381	4.86837	3.47249	4.17043	4.27431	0.00110225	0.00436526	3.83251	3.57841	3.00654	4.90693	4.67443	5.02374
PDS5A	4.32078	2.11129	5.96735	3.70241	4.83488	4.27268	0.00110542	0.00437366	4.25632	4.92236	1.92853	6.03884	6.01635	5.84686
THAP6	3.9408	1.97849	4.17666	2.19778	3.18722	4.24848	0.00115353	0.00453263	2.38185	1.75244	2.45905	4.77861	3.89202	3.85935
POU1F1	5.89225	2.55882	2.90107	0.339476	1.62027	4.24286	0.00116502	0.00457206	0.79689	-0.122031	0.34357	3.05278	2.94861	2.70181
CDK14	3.99258	1.99732	4.39423	2.32473	3.35948	4.2397	0.00117151	0.00459468	2.72289	2.68532	1.56596	4.30654	4.92059	3.95557
SP140	3.44181	1.78317	3.98494	2.2093	3.09712	4.23696	0.0011772	0.00461409	2.1754	1.99345	2.45905	3.9962	4.20236	3.75626
IRF2BP2	3.86316	1.94978	5.52401	3.46723	4.49562	4.23452	0.00118228	0.00463255	4.20288	4.27029	1.92853	5.54216	5.31426	5.71562
FOXO3	4.50431	2.17131	3.66567	1.4521	2.55889	4.22994	0.00119187	0.00466287	1.28232	1.99345	1.08054	3.60027	4.00305	3.39369
RNF183	4.00511	2.00184	3.93546	1.91726	2.92636	4.22809	0.00119575	0.0046766	1.28232	2.54093	1.92853	3.74466	4.10615	3.95557
P4HB	2.54832	1.34955	6.06641	4.66016	5.36329	4.22716	0.00119772	0.00468283	5.01412	5.16337	3.803	6.19783	5.7239	6.2775
FZD6	3.10209	1.63324	5.64223	3.9092	4.77572	4.223	0.00120654	0.00471438	4.4057	4.31537	3.00654	5.9817	5.87752	5.06746
ERH	2.19857	1.13657	5.95144	4.7691	5.36027	4.22155	0.00120963	0.00472354	5.13317	4.8008	4.37332	6.2712	6.04258	5.54053
C16orf90	4.99228	2.3197	3.37327	1.02961	2.20144	4.21762	0.00121806	0.00475056	1.28232	1.46293	0.34357	3.4398	3.15506	3.52494
SMAD6	3.48237	1.80007	4.71157	2.83978	3.77567	4.21139	0.00123152	0.00479116	2.72289	3.3374	2.45905	4.77861	5.22545	4.13066
AC013394.2	4.84471	2.27641	3.76064	1.4238	2.59222	4.20458	0.00124645	0.00483724	1.93439	1.99345	0.34357	3.74466	3.89202	3.64523
C5orf15	8.58055	3.10107	2.85324	-0.188845	1.3322	4.2018	0.00125257	0.00485502	0.79689	-1.70699	0.34357	2.52227	2.94861	3.08884
SLC38A3	8.03575	3.00643	1.52255	-1.49114	0.0157067	4.19833	0.00126028	0.00488187	-1.52504	-1.70699	-1.24139	1.67427	1.57009	1.3233
HNRNPD	3.17638	1.66739	4.90266	3.20249	4.05258	4.19652	0.00126431	0.004896	3.42916	3.71927	2.45905	4.39673	5.08106	5.23019
RPS3	2.91451	1.54326	6.7897	5.19054	5.99012	4.19508	0.00126755	0.00490551	5.5939	5.79285	4.18487	6.92977	6.21395	7.22537
EID3	10.885	3.44427	2.69288	-0.717165	0.987855	4.18545	0.00128933	0.00497754	-1.52504	0.614935	-1.24139	1.67427	3.15506	3.2493
PCED1B	4.39414	2.13558	4.05138	1.96028	3.00583	4.17189	0.00132065	0.00509376	1.93439	1.10036	2.84607	4.30654	4.20236	3.64523
FOLR2	6.28556	2.65204	3.37277	0.74694	2.05986	4.16899	0.00132743	0.00511208	0.79689	1.10036	0.34357	2.52227	3.64048	3.95557
ZBTB6	8.48947	3.08568	3.85784	0.69881	2.27832	4.13115	0.00141957	0.00542864	0.79689	2.54093	-1.24139	3.4398	4.00305	4.13066
PAQR7	2.15836	1.10994	5.18834	4.05287	4.6206	4.12814	0.00142717	0.00544942	3.96681	4.22374	3.96806	5.23498	5.39791	4.93211
UAP1L1	3.68741	1.88261	4.1681	2.34396	3.25603	4.12729	0.00142934	0.00545605	2.72289	1.46293	2.84607	3.9962	4.37745	4.13066
AC004449.6	2.51764	1.33207	5.19223	3.88926	4.54075	4.12056	0.00144653	0.00551833	4.3576	3.42229	3.88789	5.32962	4.80276	5.44432
PSMG3	2.05651	1.0402	6.10564	5.04279	5.57422	4.12019	0.00144747	0.0055201	5.10432	5.43256	4.5915	6.06659	5.84808	6.40225
SNHG3	5.32531	2.41286	6.3263	3.74975	5.03802	4.1198	0.00144849	0.00552076	4.70378	4.97951	1.56596	6.55201	5.84808	6.5788
AC007285.6	2.48879	1.31544	5.2273	3.94005	4.58367	4.11315	0.0014657	0.00557285	3.60424	3.78486	4.43103	4.96705	5.69111	5.02374
PAWR	2.28486	1.19211	5.50677	4.26773	4.88725	4.11083	0.00147175	0.0055891	4.66479	4.52183	3.61659	5.41843	5.65756	5.44432
UQCRQ	3.2411	1.69648	3.94484	2.25797	3.10141	4.10399	0.00148976	0.00564897	2.56242	1.99345	2.21804	3.8759	4.00305	3.95557
RPL4	2.02368	1.01698	7.88798	6.834	7.36099	4.09994	0.00150053	0.00568636	7.18577	7.2267	6.08952	8.06315	7.71984	7.88096
NIM1	8.52282	3.09133	1.60052	-1.49114	0.0546881	4.09619	0.00151056	0.00571922	-1.52504	-1.70699	-1.24139	2.1597	0.833129	1.80873
EHBP1L1	2.56757	1.3604	6.03914	4.60951	5.32432	4.08986	0.00152769	0.0057771	4.70378	5.41195	3.7128	5.9817	5.93467	6.20105
DKK1	2.74369	1.45612	4.59876	3.12906	3.86391	4.07596	0.00156598	0.00589529	3.11882	3.42229	2.84607	4.70989	4.20236	4.88402
GAPDH	2.35667	1.23675	8.04156	6.76103	7.40129	4.07551	0.00156724	0.00589827	6.85434	7.49022	5.93852	8.28012	7.63618	8.20839
AC092614.2	10.1439	3.34254	2.81238	-0.4345	1.18894	4.06702	0.00159112	0.00597562	0.059924	-1.70699	0.34357	2.1597	2.41809	3.85935
PRDX6	2.21841	1.14953	5.24875	4.06429	4.65652	4.06302	0.00160253	0.00600768	4.4057	4.07437	3.7128	5.32962	5.43799	4.97865
TSPO	3.22074	1.68739	4.1423	2.44343	3.29287	4.06038	0.00161008	0.0060288	2.1754	2.93686	2.21804	3.9962	4.00305	4.42764
LINC00657	3.92174	1.97149	5.67599	3.58809	4.63204	4.05609	0.00162244	0.00606425	4.20288	4.63286	1.92853	5.46086	5.62321	5.94389
MIDN	2.37535	1.24814	5.05721	3.79915	4.42818	4.05515	0.00162516	0.00607259	4.14739	3.8476	3.40246	4.70989	5.27053	5.1912
KIAA1549L	5.42116	2.4386	3.26606	0.867797	2.06693	4.04804	0.0016459	0.00613735	0.059924	0.614935	1.92853	3.05278	3.49609	3.2493
C10orf111	3.81352	1.93112	4.23307	2.3319	3.28249	4.04749	0.00164753	0.00614159	1.64489	2.68532	2.6655	3.60027	4.60572	4.49323
PABPC1	3.29559	1.72054	6.49492	4.65724	5.57608	4.04352	0.00165925	0.00617795	5.16146	5.65933	3.15093	6.53225	6.46734	6.48519
FBXO46	3.57785	1.83909	3.9185	2.04061	2.97956	4.04225	0.001663	0.00619007	2.56242	1.99345	1.56596	4.10723	4.00305	3.64523
AC100830.3	8.98128	3.16692	2.21268	-0.962821	0.624932	4.04069	0.00166766	0.00620559	-1.52504	-0.122031	-1.24139	1.67427	3.15506	1.80873
ZSWIM5	2.3075	1.20633	5.57487	4.42406	4.99947	4.03656	0.00167999	0.00624778	4.58349	3.90772	4.78098	5.1337	5.84808	5.74284
TRAPPC3	5.36758	2.42427	3.41336	0.964299	2.18883	4.035	0.00168467	0.00625962	1.93439	0.614935	0.34357	3.25923	3.89202	3.08884
BRPF1	3.22841	1.69082	4.85667	3.07916	3.96791	4.03415	0.00168725	0.00626551	2.99852	4.02093	2.21804	4.70989	5.13081	4.72929
DDX41	2.02328	1.0167	5.53576	4.48427	5.01001	4.0324	0.00169253	0.00628325	4.70378	4.63286	4.11616	5.54216	5.7239	5.34122
PHB	8.75375	3.1299	3.74974	0.597787	2.17376	4.0314	0.00169553	0.00629255	1.28232	1.75244	-1.24139	3.05278	3.64048	4.55596
UBFD1	3.52757	1.81867	4.19077	2.30683	3.2488	4.03087	0.00169714	0.00629665	2.1754	2.81657	1.92853	4.70989	4.00305	3.85935
SLC35E2	3.34858	1.74355	4.49451	2.83527	3.66489	4.02638	0.00171083	0.00633896	2.56242	2.54093	3.40246	3.9962	4.37745	5.1099
ATF4	2.52078	1.33387	4.78941	3.44028	4.11485	4.02131	0.0017264	0.00639199	3.51936	3.65056	3.15093	4.96705	4.37745	5.02374
ATP13A1	5.04781	2.33566	4.36411	1.94762	3.15586	4.01206	0.00175519	0.00648522	2.56242	2.93686	0.34357	4.10723	4.20236	4.78273
DCTN6	3.26947	1.70906	4.1398	2.40011	3.26996	4.00305	0.00178372	0.00657323	1.93439	3.04789	2.21804	3.9962	4.29256	4.13066
AC145343.2	8.8504	3.14574	1.65607	-1.49114	0.0824631	3.98478	0.00184302	0.00676598	-1.52504	-1.70699	-1.24139	0.937303	2.7076	1.3233
BEST4	2.79251	1.48156	4.71157	3.25864	3.9851	3.98034	0.00185772	0.00681346	3.83251	2.54093	3.40246	4.84419	4.67443	4.61608
FAU	2.61755	1.38822	4.86701	3.44362	4.15532	3.97807	0.00186529	0.00683212	3.51936	3.96543	2.84607	4.70989	4.74002	5.15112
SLC38A5	2.27215	1.18406	5.0457	3.8297	4.4377	3.97805	0.00186538	0.00683212	3.90123	4.07437	3.5135	5.32962	4.74002	5.06746
EIF4A1	2.45266	1.29435	5.3426	4.09253	4.71756	3.97353	0.00188054	0.00687362	3.96681	4.1259	4.18487	4.90693	5.13081	5.99006
COG4	2.21561	1.1477	5.38603	4.20054	4.79328	3.96069	0.00192435	0.00700119	4.58349	4.40153	3.61659	5.50209	5.1789	5.47711
RPL41	3.655	1.86987	4.35716	2.4567	3.40693	3.95882	0.0019308	0.00701854	3.11882	2.68532	1.56596	4.39673	3.89202	4.78273
TSSC4	9.68899	3.27635	3.07204	-0.257661	1.40719	3.95635	0.00193937	0.00704768	-1.52504	1.99345	-1.24139	2.81177	3.15506	3.2493
CTNNAL1	2.96647	1.56875	4.82158	3.17408	3.99783	3.94365	0.00198411	0.00718125	3.51936	3.78486	2.21804	5.02477	4.60572	4.83426
RRS1	3.96859	1.98863	5.41223	3.28957	4.3509	3.941	0.00199358	0.00721338	3.90123	4.40153	1.56596	5.50209	5.22545	5.50917
C17orf99	5.36986	2.42489	3.07875	0.622142	1.85044	3.93923	0.00199993	0.00723429	0.059924	1.46293	0.34357	3.4398	2.7076	3.08884
ACY1	2.85006	1.51099	4.67122	3.21811	3.94467	3.92932	0.00203584	0.00734306	2.56242	3.04789	4.04401	4.48162	4.80276	4.72929
DDIT4	3.05215	1.60982	4.44725	2.80644	3.62684	3.91678	0.00208226	0.00748207	2.38185	3.57841	2.45905	4.21032	4.45762	4.6738
FAM72B	6.90921	2.78852	3.03573	0.21862	1.62718	3.91666	0.00208272	0.00748207	1.28232	0.614935	-1.24139	2.52227	3.33563	3.2493
FAM129C	4.74976	2.24785	3.00323	0.74694	1.87508	3.91158	0.00210183	0.00753688	0.79689	1.10036	0.34357	3.05278	2.7076	3.2493
BCL2L11	3.04079	1.60444	3.86902	2.2666	3.06781	3.91149	0.00210217	0.00753688	2.38185	2.1999	2.21804	3.74466	4.00305	3.85935
ZBED6	7.53017	2.91268	2.90281	-0.0270356	1.43789	3.91038	0.00210636	0.00754758	0.059924	1.10036	-1.24139	2.1597	3.15506	3.39369
ATXN2L	3.20328	1.67955	4.31045	2.6815	3.49598	3.90702	0.00211913	0.00758685	2.99852	2.38047	2.6655	3.9962	4.00305	4.93211
ZNF566	2.67861	1.42148	4.97688	3.49864	4.23776	3.90544	0.00212518	0.00760246	3.68441	3.96543	2.84607	5.32962	4.53357	5.06746
ZNF639	7.18657	2.8453	3.58856	0.645322	2.11694	3.90263	0.00213595	0.00763837	0.79689	2.38047	-1.24139	3.74466	3.49609	3.52494
THUMPD1	8.50454	3.08823	4.90266	1.61991	3.26129	3.89883	0.0021506	0.00768422	2.38185	3.71927	-1.24139	5.18523	4.74002	4.78273
ZNF669	8.31504	3.05572	2.3462	-0.717165	0.814516	3.87925	0.0022278	0.00792401	0.79689	-1.70699	-1.24139	2.81177	2.05552	2.1713
ACACA	2.52199	1.33456	5.43654	4.0699	4.75322	3.87218	0.00225637	0.00800749	4.4057	4.40153	3.40246	5.54216	4.92059	5.84686
WDR46	2.04837	1.03448	5.31049	4.24853	4.77951	3.87183	0.00225778	0.00801025	4.54105	4.40153	3.803	5.32962	5.22545	5.37641
ZNF655	2.69683	1.43126	4.35495	2.9153	3.63513	3.87021	0.00226439	0.00802764	2.56242	3.3374	2.84607	4.30654	4.20236	4.55596
RNF121	3.52352	1.81702	3.82437	2.04863	2.9365	3.86826	0.00227237	0.00805292	1.93439	1.99345	2.21804	3.25923	4.00305	4.21083
CLN8	7.09623	2.82705	2.95485	0.0938211	1.52434	3.86138	0.00230074	0.00813281	0.059924	1.46293	-1.24139	2.52227	2.94861	3.39369
ZNF101	4.38593	2.13288	3.59883	1.43707	2.51795	3.85819	0.00231403	0.00816832	1.64489	1.10036	1.56596	3.9962	3.89202	2.90826
TMEM259	2.83594	1.50383	4.69485	3.12932	3.91208	3.84919	0.00235191	0.00828341	3.51936	3.65056	2.21804	4.56179	4.74002	4.78273
ST7	2.77819	1.47415	4.40119	2.94492	3.67306	3.8367	0.00240556	0.00845816	2.86728	2.81657	3.15093	3.9962	4.92059	4.28678
SLC25A38	3.84303	1.94225	3.70227	1.73828	2.72027	3.83458	0.0024148	0.00848351	1.93439	2.1999	1.08054	3.25923	3.89202	3.95557
IRF2BPL	2.08723	1.06159	4.92222	3.87264	4.39743	3.83351	0.00241945	0.00849692	3.68441	3.96543	3.96806	4.77861	4.92059	5.06746
PVT1	3.28015	1.71376	4.08392	2.35959	3.22175	3.83255	0.00242366	0.0085075	2.1754	2.68532	2.21804	4.39673	3.49609	4.35893
CSTF2T	3.93118	1.97496	4.68221	2.60428	3.64324	3.83097	0.00243055	0.00852695	3.22985	3.50246	1.08054	4.39673	4.92059	4.72929
NYAP2	6.71206	2.74676	2.60337	-0.188845	1.20726	3.82842	0.00244182	0.00855692	0.059924	0.614935	-1.24139	3.05278	2.05552	2.70181
EPHA2	2.80801	1.48955	4.48094	2.93544	3.70819	3.82039	0.0024775	0.00865673	2.56242	3.57841	2.6655	4.77861	4.37745	4.28678
WDR63	7.55756	2.91792	1.96703	-0.962821	0.502104	3.81665	0.0024943	0.00869961	0.059924	-1.70699	-1.24139	2.52227	1.57009	1.80873
RPS11	3.42935	1.77794	5.98621	4.08342	5.03481	3.81533	0.00250028	0.00871804	4.70378	5.08742	2.45905	6.09381	5.7239	6.14092
ZNF469	7.65158	2.93576	2.2497	-0.717165	0.766265	3.81119	0.00251907	0.00876896	-1.52504	0.614935	-1.24139	2.52227	2.41809	1.80873
ZNF628	3.91944	1.97065	3.6903	1.73828	2.71429	3.79539	0.00259208	0.00899321	0.79689	2.1999	2.21804	3.4398	3.77173	3.85935
RGS2	5.05963	2.33903	3.09889	0.718644	1.90877	3.79088	0.00261336	0.00905707	0.059924	1.75244	0.34357	3.05278	3.33563	2.90826
VPREB3	3.67214	1.87662	3.67241	1.73828	2.70534	3.78115	0.0026598	0.00919517	1.93439	2.1999	1.08054	3.9962	3.49609	3.52494
GPN2	6.5922	2.72076	3.1352	0.380429	1.75782	3.77672	0.00268122	0.00925649	1.28232	1.10036	-1.24139	3.05278	2.7076	3.64523
FAM188A	4.92822	2.30107	3.1352	0.830787	1.98299	3.77451	0.002692	0.00928862	0.79689	0.614935	1.08054	2.81177	3.89202	2.70181
TFAP2E	2.34851	1.23174	5.13184	3.84687	4.48936	3.77183	0.00270511	0.00932874	3.90123	4.1259	3.5135	5.1337	5.58802	4.6738
ZBTB43	4.24156	2.0846	4.02144	1.93229	2.97686	3.76248	0.00275134	0.00945663	2.72289	1.99345	1.08054	3.25923	4.37745	4.42764
CCT6B	3.4319	1.77901	3.53507	1.73477	2.63492	3.75948	0.00276632	0.00949813	1.64489	1.99345	1.56596	3.4398	3.77173	3.39369
LRRC45	2.1033	1.07265	5.33721	4.27993	4.80857	3.75795	0.00277402	0.00952197	3.96681	4.55979	4.3132	4.96705	5.35669	5.68787
NAMPT	2.17186	1.11893	5.3774	4.24661	4.812	3.75757	0.00277591	0.00952452	4.02955	4.22374	4.48653	5.46086	5.78733	4.88402
ANO10	3.27792	1.71278	4.00629	2.28377	3.14503	3.7575	0.00277628	0.00952452	1.64489	2.54093	2.6655	3.9962	4.37745	3.64523
RPL13	3.30017	1.72254	5.49189	3.65859	4.57524	3.75729	0.00277734	0.00952557	4.08967	4.66805	2.21804	5.58116	5.1789	5.71562
EGR1	7.61113	2.92811	2.71271	-0.188845	1.26193	3.75607	0.00278348	0.0095414	0.059924	-1.70699	1.08054	3.25923	2.7076	2.1713
NHS	3.4396	1.78224	4.50938	2.66668	3.58803	3.7505	0.00281175	0.00963306	1.93439	3.8476	2.21804	4.56179	4.29256	4.6738
[truncated: 2,147 more rows]

## Sheet: S1C HelaNucleus Spliceostatin
Table S1B Differentially expressed genes in the nucleus of Hela cells treated by spliceostatin A (GSE72156)
[truncated: 2,380 more rows]

[truncated: 1 more sheets: S1D common]
