# Supplementary material
Source: HighWire-hosted journal article supplement (doi:10.1101/rna.065383.117)
Supplement: Supplemental_Table_S2_GSEA_for_DE_genes.xlsx [file Supplemental_Table_S2_GSEA_for_DE_genes.xlsx]

## Sheet: S2A Rh18_sudemycin
Table S2A GSEA for differentially expressed genes in Rh18 cells treated by Sudemycin
Source	NAME	SIZE	ES	NES	NOM p-val	FDR q-val
Customized	HELA_SSA	493	0.677945	3.70303	0	0
mSigDB_curated_v5.2	REACTOME_PEPTIDE_CHAIN_ELONGATION	81	0.704217	2.96912	0	0
mSigDB_curated_v5.2	KEGG_RIBOSOME	83	0.698122	2.95396	0	0
mSigDB_curated_v5.2	REACTOME_3_UTR_MEDIATED_TRANSLATIONAL_REGULATION	101	0.660528	2.87793	0	0
mSigDB_curated_v5.2	REACTOME_SRP_DEPENDENT_COTRANSLATIONAL_PROTEIN_TARGETING_TO_MEMBRANE	104	0.652579	2.87569	0	0
mSigDB_GO_v5.2	GO_ESTABLISHMENT_OF_PROTEIN_LOCALIZATION_TO_ENDOPLASMIC_RETICULUM	101	0.647018	2.82553	0	0
mSigDB_GO_v5.2	GO_CYTOSOLIC_RIBOSOME	99	0.650045	2.80525	0	0
mSigDB_curated_v5.2	GHANDHI_DIRECT_IRRADIATION_UP	69	0.65938	2.72546	0	0
mSigDB_curated_v5.2	REACTOME_TRANSLATION	140	0.575595	2.65619	0	0
mSigDB_curated_v5.2	REACTOME_NONSENSE_MEDIATED_DECAY_ENHANCED_BY_THE_EXON_JUNCTION_COMPLEX	102	0.615814	2.65119	0	0
mSigDB_GO_v5.2	GO_PROTEIN_LOCALIZATION_TO_ENDOPLASMIC_RETICULUM	117	0.588337	2.6323	0	0
mSigDB_GO_v5.2	GO_CYTOSOLIC_LARGE_RIBOSOMAL_SUBUNIT	55	0.67146	2.62658	0	0
mSigDB_curated_v5.2	GARGALOVIC_RESPONSE_TO_OXIDIZED_PHOSPHOLIPIDS_BLUE_UP	112	0.587488	2.5963	0	0
mSigDB_GO_v5.2	GO_NUCLEAR_TRANSCRIBED_MRNA_CATABOLIC_PROCESS_NONSENSE_MEDIATED_DECAY	115	0.56918	2.52336	0	0
mSigDB_curated_v5.2	SMIRNOV_RESPONSE_TO_IR_2HR_UP	47	0.669978	2.50042	0	0
mSigDB_GO_v5.2	GO_MULTI_ORGANISM_METABOLIC_PROCESS	134	0.541132	2.45787	0	0
mSigDB_curated_v5.2	SMIRNOV_RESPONSE_TO_IR_6HR_UP	147	0.523722	2.43107	0	0
mSigDB_curated_v5.2	WARTERS_IR_RESPONSE_5GY	36	0.682849	2.41892	0	0
mSigDB_curated_v5.2	REACTOME_ACTIVATION_OF_THE_MRNA_UPON_BINDING_OF_THE_CAP_BINDING_COMPLEX_AND_EIFS_AND_SUBSEQUENT_BINDING_TO_43S	54	0.621056	2.3842	0	0
mSigDB_GO_v5.2	GO_TRANSLATIONAL_INITIATION	137	0.520756	2.38347	0	0
mSigDB_curated_v5.2	ZWANG_CLASS_3_TRANSIENTLY_INDUCED_BY_EGF	185	0.493023	2.37088	0	0
mSigDB_GO_v5.2	GO_RIBOSOMAL_SUBUNIT	151	0.508904	2.37057	0	0.000282814
mSigDB_GO_v5.2	GO_CYTOSOLIC_SMALL_RIBOSOMAL_SUBUNIT	38	0.649927	2.33085	0	0.00037411
mSigDB_curated_v5.2	REACTOME_FORMATION_OF_THE_TERNARY_COMPLEX_AND_SUBSEQUENTLY_THE_43S_COMPLEX	46	0.618583	2.31754	0	0.000145828
mSigDB_curated_v5.2	GARGALOVIC_RESPONSE_TO_OXIDIZED_PHOSPHOLIPIDS_MAGENTA_UP	24	0.714571	2.26821	0	0.000197148
mSigDB_curated_v5.2	BILANGES_SERUM_AND_RAPAMYCIN_SENSITIVE_GENES	64	0.57265	2.25211	0	0.00018776
mSigDB_curated_v5.2	REACTOME_GENERIC_TRANSCRIPTION_PATHWAY	289	0.436728	2.2299	0	0.000358391
mSigDB_curated_v5.2	NAGASHIMA_NRG1_SIGNALING_UP	159	0.478443	2.21786	0	0.000399342
mSigDB_GO_v5.2	GO_LARGE_RIBOSOMAL_SUBUNIT	89	0.521355	2.21204	0	0.00236827
mSigDB_curated_v5.2	TIEN_INTESTINE_PROBIOTICS_6HR_UP	53	0.573767	2.20953	0	0.000436518
mSigDB_curated_v5.2	GHANDHI_BYSTANDER_IRRADIATION_UP	48	0.578978	2.20344	0	0.000522764
mSigDB_curated_v5.2	KERLEY_RESPONSE_TO_CISPLATIN_UP	39	0.607403	2.18123	0	0.000799567
mSigDB_curated_v5.2	AMIT_EGF_RESPONSE_120_MCF10A	37	0.609215	2.17704	0	0.000960508
mSigDB_curated_v5.2	WANG_METHYLATED_IN_BREAST_CANCER	33	0.624225	2.17055	0	0.00106508
mSigDB_curated_v5.2	REACTOME_METABOLISM_OF_MRNA	203	0.447408	2.16779	0	0.00120816
mSigDB_curated_v5.2	WARTERS_RESPONSE_TO_IR_SKIN	65	0.540086	2.15819	0	0.00125423
mSigDB_curated_v5.2	NAGASHIMA_EGF_SIGNALING_UP	51	0.557646	2.15546	0	0.0012558
mSigDB_curated_v5.2	TAKAO_RESPONSE_TO_UVB_RADIATION_UP	79	0.512164	2.14846	0	0.00141778
mSigDB_curated_v5.2	GARGALOVIC_RESPONSE_TO_OXIDIZED_PHOSPHOLIPIDS_TURQUOISE_UP	72	0.52151	2.1473	0	0.0014149
mSigDB_curated_v5.2	PHONG_TNF_RESPONSE_VIA_P38_PARTIAL	149	0.45894	2.14628	0	0.00137328
mSigDB_curated_v5.2	CROMER_TUMORIGENESIS_UP	49	0.561763	2.13921	0	0.0015191
mSigDB_curated_v5.2	DEBIASI_APOPTOSIS_BY_REOVIRUS_INFECTION_UP	280	0.424748	2.1378	0	0.00151157
mSigDB_curated_v5.2	CHNG_MULTIPLE_MYELOMA_HYPERPLOID_UP	49	0.568663	2.1338	0	0.00157565
mSigDB_curated_v5.2	GENTILE_UV_RESPONSE_CLUSTER_D2	40	0.589849	2.13167	0	0.0016023
mSigDB_GO_v5.2	GO_POSITIVE_REGULATION_OF_INTERFERON_GAMMA_PRODUCTION	29	0.630355	2.12943	0.00232558	0.00735998
mSigDB_curated_v5.2	CLASPER_LYMPHATIC_VESSELS_DURING_METASTASIS_DN	33	0.615126	2.12908	0	0.00165952
mSigDB_GO_v5.2	GO_REGULATION_OF_INTERFERON_GAMMA_PRODUCTION	43	0.558904	2.09891	0	0.0115159
mSigDB_GO_v5.2	GO_RNA_CATABOLIC_PROCESS	209	0.425947	2.06223	0	0.0186049
mSigDB_GO_v5.2	GO_SERINE_TYPE_ENDOPEPTIDASE_INHIBITOR_ACTIVITY	34	0.587586	2.04541	0.0021978	0.0228414
mSigDB_GO_v5.2	GO_RIBOSOME	205	0.413221	2.02273	0	0.0284607
mSigDB_GO_v5.2	GO_REGULATION_OF_RNA_SPLICING	78	0.486557	2.01536	0	0.0292186
mSigDB_GO_v5.2	GO_VIRAL_LIFE_CYCLE	247	0.399007	1.98296	0	0.0406942
mSigDB_GO_v5.2	GO_RIBOSOMAL_LARGE_SUBUNIT_BIOGENESIS	46	0.530986	1.97902	0	0.0401243
mSigDB_GO_v5.2	GO_POSITIVE_REGULATION_OF_LEUKOCYTE_PROLIFERATION	60	0.497707	1.97219	0	0.0415771
mSigDB_GO_v5.2	GO_CARDIAC_SEPTUM_MORPHOGENESIS	38	0.540966	1.97173	0	0.0397785
mSigDB_GO_v5.2	GO_SMALL_RIBOSOMAL_SUBUNIT	62	0.494773	1.97014	0	0.0386376
mSigDB_GO_v5.2	GO_RIBOSOMAL_LARGE_SUBUNIT_ASSEMBLY	21	0.637316	1.96812	0	0.0378025
mSigDB_GO_v5.2	GO_U2_TYPE_SPLICEOSOMAL_COMPLEX	28	0.590111	1.95472	0.0019802	0.0428827
mSigDB_GO_v5.2	GO_CALCIUM_DEPENDENT_CELL_CELL_ADHESION_VIA_PLASMA_MEMBRANE_CELL_ADHESION_MOLECULES	15	0.683333	1.94537	0.00212766	0.0454536
mSigDB_GO_v5.2	GO_PROTEIN_TARGETING_TO_MEMBRANE	144	0.422673	1.94244	0	0.0453499
mSigDB_GO_v5.2	GO_POSITIVE_REGULATION_OF_TRANSCRIPTION_FROM_RNA_POLYMERASE_II_PROMOTER_IN_RESPONSE_TO_STRESS	21	0.635433	1.93639	0	0.0464686
mSigDB_GO_v5.2	GO_REGULATION_OF_ALTERNATIVE_MRNA_SPLICING_VIA_SPLICEOSOME	26	0.595672	1.93577	0	0.0451213
mSigDB_GO_v5.2	GO_RRNA_METABOLIC_PROCESS	246	0.391229	1.92824	0	0.0478939
mSigDB_GO_v5.2	GO_CILIARY_BASAL_BODY	66	-0.485359	-1.90272	0.00340136	0.0263896
mSigDB_GO_v5.2	GO_ALPHA_AMINO_ACID_METABOLIC_PROCESS	161	-0.421127	-1.90894	0	0.0252758
mSigDB_GO_v5.2	GO_CILIUM_MORPHOGENESIS	157	-0.419769	-1.91009	0	0.02543
mSigDB_GO_v5.2	GO_DEOXYRIBOSE_PHOSPHATE_CATABOLIC_PROCESS	21	-0.632531	-1.91692	0.00174825	0.0237665
mSigDB_GO_v5.2	GO_MOTOR_ACTIVITY	94	-0.458834	-1.91862	0	0.0239359
mSigDB_GO_v5.2	GO_LIGASE_ACTIVITY_FORMING_CARBON_NITROGEN_BONDS	45	-0.538323	-1.92346	0	0.0230494
mSigDB_GO_v5.2	GO_CHROMOSOME_SEGREGATION	231	-0.401483	-1.93031	0	0.0214138
mSigDB_GO_v5.2	GO_SMALL_MOLECULE_CATABOLIC_PROCESS	224	-0.405612	-1.93505	0	0.0208645
mSigDB_GO_v5.2	GO_CELLULAR_AMINO_ACID_METABOLIC_PROCESS	249	-0.401642	-1.93716	0	0.0208693
mSigDB_GO_v5.2	GO_PYRIDOXAL_PHOSPHATE_BINDING	32	-0.57898	-1.94449	0	0.0195035
mSigDB_GO_v5.2	GO_CALCIUM_ION_TRANSMEMBRANE_TRANSPORTER_ACTIVITY	67	-0.493061	-1.94452	0	0.0202258
mSigDB_GO_v5.2	GO_ANION_TRANSMEMBRANE_TRANSPORT	122	-0.448313	-1.94685	0	0.0203444
mSigDB_GO_v5.2	GO_CENTRIOLE	86	-0.475421	-1.94913	0	0.0203333
mSigDB_GO_v5.2	GO_CATION_CHANNEL_ACTIVITY	130	-0.444491	-1.95117	0	0.0204292
mSigDB_GO_v5.2	GO_DNA_REPLICATION	192	-0.418671	-1.95486	0	0.0205767
mSigDB_GO_v5.2	GO_THIOESTER_METABOLIC_PROCESS	62	-0.507734	-1.95863	0	0.0204858
mSigDB_GO_v5.2	GO_NUCLEAR_CHROMOSOME_SEGREGATION	191	-0.424555	-1.96382	0	0.0199181
mSigDB_GO_v5.2	GO_L_AMINO_ACID_TRANSMEMBRANE_TRANSPORTER_ACTIVITY	34	-0.576329	-1.97467	0	0.0177632
mSigDB_GO_v5.2	GO_MITOTIC_SPINDLE	48	-0.531405	-1.9765	0	0.0181756
mSigDB_GO_v5.2	GO_SISTER_CHROMATID_SEGREGATION	164	-0.433397	-1.97873	0	0.0185266
mSigDB_GO_v5.2	GO_AMINO_ACID_TRANSMEMBRANE_TRANSPORT	41	-0.567555	-1.98071	0	0.0191896
mSigDB_GO_v5.2	GO_ACYL_COA_METABOLIC_PROCESS	62	-0.507734	-1.98563	0	0.0190888
mSigDB_GO_v5.2	GO_REGULATION_OF_INTRACELLULAR_ESTROGEN_RECEPTOR_SIGNALING_PATHWAY	20	-0.660128	-1.98877	0.00184843	0.0192759
mSigDB_GO_v5.2	GO_ORGANIC_ACID_CATABOLIC_PROCESS	141	-0.444949	-1.99345	0	0.0191072
mSigDB_GO_v5.2	GO_CARBOXYLIC_ACID_CATABOLIC_PROCESS	141	-0.444949	-2.00034	0	0.0185091
mSigDB_GO_v5.2	GO_ORGANIC_ACID_TRANSMEMBRANE_TRANSPORT	60	-0.520609	-2.00168	0	0.019672
mSigDB_GO_v5.2	GO_MONOCARBOXYLIC_ACID_CATABOLIC_PROCESS	71	-0.499847	-2.00607	0	0.0197407
mSigDB_GO_v5.2	GO_AMINO_ACID_TRANSMEMBRANE_TRANSPORTER_ACTIVITY	47	-0.550301	-2.00744	0	0.0211767
mSigDB_GO_v5.2	GO_CILIUM_ORGANIZATION	141	-0.45036	-2.0116	0	0.0224234
mSigDB_GO_v5.2	GO_MICROTUBULE_ORGANIZING_CENTER_PART	124	-0.461925	-2.02082	0	0.0219533
mSigDB_GO_v5.2	GO_ORGANIC_ACID_TRANSMEMBRANE_TRANSPORTER_ACTIVITY	74	-0.513023	-2.05253	0	0.0160843
mSigDB_GO_v5.2	GO_TELOMERE_MAINTENANCE_VIA_RECOMBINATION	32	-0.61612	-2.06155	0	0.016205
mSigDB_GO_v5.2	GO_HYDROLASE_ACTIVITY_HYDROLYZING_N_GLYCOSYL_COMPOUNDS	19	-0.696339	-2.08288	0	0.0140471
mSigDB_GO_v5.2	GO_DNA_REPLICATION_INITIATION	27	-0.652707	-2.09124	0.00178891	0.0146374
mSigDB_GO_v5.2	GO_MITOTIC_RECOMBINATION	40	-0.585179	-2.09225	0	0.0192107
mSigDB_curated_v5.2	CHANG_CYCLING_GENES	144	-0.470596	-2.09766	0	0.00133765
mSigDB_curated_v5.2	ZHAN_MULTIPLE_MYELOMA_PR_UP	42	-0.590298	-2.11251	0	0.000963593
mSigDB_curated_v5.2	GAVIN_FOXP3_TARGETS_CLUSTER_P6	75	-0.524146	-2.11635	0	0.00097151
mSigDB_GO_v5.2	GO_ORGANIC_ANION_TRANSMEMBRANE_TRANSPORTER_ACTIVITY	92	-0.505137	-2.12067	0	0.015774
mSigDB_curated_v5.2	LEE_EARLY_T_LYMPHOCYTE_UP	89	-0.503744	-2.1213	0	0.000825222
mSigDB_GO_v5.2	GO_LYASE_ACTIVITY	127	-0.48526	-2.13145	0	0.0261187
mSigDB_curated_v5.2	SOTIRIOU_BREAST_CANCER_GRADE_1_VS_3_UP	145	-0.481331	-2.14126	0	0.000732991
mSigDB_curated_v5.2	KEGG_DNA_REPLICATION	35	-0.627325	-2.1413	0	0.00076486
mSigDB_curated_v5.2	SMID_BREAST_CANCER_LUMINAL_A_DN	16	-0.746988	-2.14151	0	0.000799627
mSigDB_curated_v5.2	KAUFFMANN_MELANOMA_RELAPSE_UP	58	-0.55698	-2.14221	0	0.000837704
mSigDB_curated_v5.2	FUJII_YBX1_TARGETS_DN	188	-0.464039	-2.15994	0	0.000611285
mSigDB_curated_v5.2	WHITFIELD_CELL_CYCLE_LITERATURE	44	-0.604328	-2.17201	0	0.000481915
mSigDB_curated_v5.2	ZHANG_TLX_TARGETS_DN	85	-0.526112	-2.17695	0	0.000465941
mSigDB_curated_v5.2	KAMMINGA_EZH2_TARGETS	40	-0.617596	-2.188	0	0.000361439
mSigDB_curated_v5.2	BURTON_ADIPOGENESIS_3	96	-0.527898	-2.19304	0	0.000286635
mSigDB_curated_v5.2	REACTOME_ACTIVATION_OF_THE_PRE_REPLICATIVE_COMPLEX	29	-0.665048	-2.1979	0	0.000305744
mSigDB_curated_v5.2	REACTOME_DNA_STRAND_ELONGATION	30	-0.670862	-2.20884	0	0.000273488
mSigDB_curated_v5.2	VERNELL_RETINOBLASTOMA_PATHWAY_UP	68	-0.558506	-2.21568	0	0.000294525
mSigDB_curated_v5.2	ISHIDA_E2F_TARGETS	51	-0.598637	-2.2252	0	0.000190334
mSigDB_curated_v5.2	KOBAYASHI_EGFR_SIGNALING_24HR_DN	234	-0.463784	-2.24101	0	6.95046e-05
mSigDB_curated_v5.2	EGUCHI_CELL_CYCLE_RB1_TARGETS	23	-0.729564	-2.24128	0	7.6455e-05
mSigDB_curated_v5.2	CROONQUIST_NRAS_SIGNALING_DN	72	-0.572358	-2.27603	0	8.495e-05
mSigDB_curated_v5.2	KUNINGER_IGF1_VS_PDGFB_TARGETS_UP	60	-0.58809	-2.30014	0	9.55688e-05
mSigDB_curated_v5.2	GRAHAM_NORMAL_QUIESCENT_VS_NORMAL_DIVIDING_DN	80	-0.583491	-2.3679	0	0
mSigDB_curated_v5.2	KANG_DOXORUBICIN_RESISTANCE_UP	53	-0.640741	-2.37307	0	0
mSigDB_curated_v5.2	CROONQUIST_IL6_DEPRIVATION_DN	93	-0.583991	-2.4169	0	0
mSigDB_curated_v5.2	ROSTY_CERVICAL_CANCER_PROLIFERATION_CLUSTER	136	-0.544136	-2.43383	0	0
mSigDB_curated_v5.2	DUTERTRE_ESTRADIOL_RESPONSE_24HR_UP	296	-0.540435	-2.62239	0	0
SIZE
ES
NES
NOM p-val
FDR q-val

## Sheet: S2B Hela_spliceostatin
Table S2B GSEA for differentially expressed genes in Hela cells treated by spliceostatin
NAME	SIZE	ES	NES	NOM p-val	FDR q-val	FWER p-val
GO_CYTOSOLIC_RIBOSOME	103	0.623719	2.32176	0	0	0
GO_ESTABLISHMENT_OF_PROTEIN_LOCALIZATION_TO_ENDOPLASMIC_RETICULUM	101	0.60758	2.27896	0	0	0
GO_CYTOSOLIC_LARGE_RIBOSOMAL_SUBUNIT	57	0.665333	2.27406	0	0	0
GO_NUCLEAR_TRANSCRIBED_MRNA_CATABOLIC_PROCESS_NONSENSE_MEDIATED_DECAY	114	0.583289	2.22618	0	0.000642865	0.002
GO_PROTEIN_LOCALIZATION_TO_ENDOPLASMIC_RETICULUM	117	0.571171	2.1732	0	0.00258446	0.01
GO_LARGE_RIBOSOMAL_SUBUNIT	89	0.557411	2.06626	0	0.0135828	0.058
GO_TRANSLATIONAL_INITIATION	134	0.523113	2.01254	0	0.0270763	0.133
GO_RIBOSOMAL_SUBUNIT	152	0.505649	1.99452	0	0.0319535	0.175
GO_MULTI_ORGANISM_METABOLIC_PROCESS	133	0.507305	1.96773	0	0.0467335	0.274
REACTOME_PEPTIDE_CHAIN_ELONGATION	82	0.697786	2.53108	0	0	0
KEGG_RIBOSOME	84	0.679865	2.47786	0	0	0
REACTOME_3_UTR_MEDIATED_TRANSLATIONAL_REGULATION	101	0.650166	2.4232	0	0	0
BILANGES_SERUM_AND_RAPAMYCIN_SENSITIVE_GENES	64	0.683682	2.38871	0	0	0
REACTOME_SRP_DEPENDENT_COTRANSLATIONAL_PROTEIN_TARGETING_TO_MEMBRANE	104	0.621989	2.34564	0	0	0
HSIAO_HOUSEKEEPING_GENES	364	0.530505	2.32744	0	0	0
REACTOME_INFLUENZA_VIRAL_RNA_TRANSCRIPTION_AND_REPLICATION	97	0.621717	2.31141	0	0	0
REACTOME_NONSENSE_MEDIATED_DECAY_ENHANCED_BY_THE_EXON_JUNCTION_COMPLEX	102	0.605544	2.27059	0	0	0
NAGASHIMA_EGF_SIGNALING_UP	44	0.679094	2.1791	0	0.000580213	0.004
AMIT_EGF_RESPONSE_60_MCF10A	31	0.712661	2.1719	0	0.000656108	0.005
BURTON_ADIPOGENESIS_PEAK_AT_2HR	44	0.678484	2.16058	0	0.00096171	0.008
PICCALUGA_ANGIOIMMUNOBLASTIC_LYMPHOMA_DN	110	0.56045	2.1241	0	0.00197501	0.017
REACTOME_TRANSLATION	138	0.544271	2.09655	0	0.00284039	0.026
TIEN_INTESTINE_PROBIOTICS_6HR_UP	53	0.626136	2.08535	0	0.00311019	0.031
DIRMEIER_LMP1_RESPONSE_EARLY	45	0.641549	2.05191	0	0.00464742	0.051
DORN_ADENOVIRUS_INFECTION_32HR_DN	36	0.643494	2.00729	0	0.00991186	0.132
MAHADEVAN_RESPONSE_TO_MP470_DN	15	0.791795	2.00801	0	0.0103144	0.13
BILANGES_SERUM_RESPONSE_TRANSLATION	30	0.681104	2.01277	0	0.010689	0.119
GRATIAS_RETINOBLASTOMA_16Q24	15	0.792357	2.00846	0	0.0106916	0.127
REACTOME_ACTIVATION_OF_THE_MRNA_UPON_BINDING_OF_THE_CAP_BINDING_COMPLEX_AND_EIFS_AND_SUBSEQUENT_BINDING_TO_43S	53	0.595906	1.99186	0	0.0126268	0.171
TIAN_TNF_SIGNALING_NOT_VIA_NFKB	19	0.745044	1.96357	0	0.018248	0.254
PHONG_TNF_TARGETS_UP	45	0.606701	1.95161	0	0.0206294	0.294
LUI_THYROID_CANCER_CLUSTER_3	27	0.672443	1.94751	0	0.020999	0.311
NIKOLSKY_BREAST_CANCER_16P13_AMPLICON	98	0.52095	1.94069	0	0.0216618	0.331
BONOME_OVARIAN_CANCER_POOR_SURVIVAL_DN	16	0.737131	1.93256	0	0.0233787	0.359
KEGG_FATTY_ACID_METABOLISM	30	0.650427	1.92641	0	0.0243019	0.38
PRAMOONJAGO_SOX4_TARGETS_UP	45	0.585561	1.91011	0	0.0301695	0.466
IIZUKA_LIVER_CANCER_PROGRESSION_L0_L1_DN	19	0.707404	1.90027	0.00227273	0.0329017	0.514

## Sheet: S2C HelaNucleus_spliceostatin
Table S2C GSEA for differentially expressed genes in the necleus of Hela cells treated by spliceostatin
NAME	SIZE	ES	NES	NOM p-val	FDR q-val	FWER p-val
HSIAO_HOUSEKEEPING_GENES	361	0.714492	3.42104	0	0	0
REACTOME_TRANSLATION	140	0.791476	3.41504	0	0	0
REACTOME_SRP_DEPENDENT_COTRANSLATIONAL_PROTEIN_TARGETING_TO_MEMBRANE	105	0.807948	3.34878	0	0	0
REACTOME_3_UTR_MEDIATED_TRANSLATIONAL_REGULATION	102	0.820895	3.34674	0	0	0
GO_TRANSLATIONAL_INITIATION	136	0.774333	3.32024	0	0	0
KEGG_RIBOSOME	84	0.822615	3.30913	0	0	0
REACTOME_PEPTIDE_CHAIN_ELONGATION	82	0.828592	3.28799	0	0	0
GO_ESTABLISHMENT_OF_PROTEIN_LOCALIZATION_TO_ENDOPLASMIC_RETICULUM	101	0.79001	3.27534	0	0	0
GO_CYTOSOLIC_RIBOSOME	101	0.799575	3.26158	0	0	0
GO_PROTEIN_LOCALIZATION_TO_ENDOPLASMIC_RETICULUM	117	0.775129	3.25463	0	0	0
REACTOME_INFLUENZA_VIRAL_RNA_TRANSCRIPTION_AND_REPLICATION	98	0.785268	3.23916	0	0	0
GO_RIBOSOMAL_SUBUNIT	152	0.740293	3.23404	0	0	0
REACTOME_METABOLISM_OF_MRNA	200	0.720766	3.22822	0	0	0
GO_RIBOSOME	205	0.696961	3.19166	0	0	0
GO_PROTEIN_TARGETING_TO_MEMBRANE	138	0.732174	3.14068	0	0	0
REACTOME_NONSENSE_MEDIATED_DECAY_ENHANCED_BY_THE_EXON_JUNCTION_COMPLEX	102	0.761145	3.1367	0	0	0
GO_MULTI_ORGANISM_METABOLIC_PROCESS	135	0.724449	3.13516	0	0	0
REACTOME_METABOLISM_OF_RNA	245	0.674715	3.11453	0	0	0
GO_CYTOSOLIC_LARGE_RIBOSOMAL_SUBUNIT	57	0.819061	3.10263	0	0	0
REACTOME_INFLUENZA_LIFE_CYCLE	132	0.725007	3.09006	0	0	0
GO_STRUCTURAL_CONSTITUENT_OF_RIBOSOME	188	0.681369	3.08242	0	0	0
REACTOME_ACTIVATION_OF_THE_MRNA_UPON_BINDING_OF_THE_CAP_BINDING_COMPLEX_AND_EIFS_AND_SUBSEQUENT_BINDING_TO_43S	54	0.816049	3.06543	0	0	0
REACTOME_METABOLISM_OF_PROTEINS	352	0.638566	3.04339	0	0	0
GO_NUCLEAR_TRANSCRIBED_MRNA_CATABOLIC_PROCESS_NONSENSE_MEDIATED_DECAY	114	0.730686	3.03979	0	0	0
KEGG_SPLICEOSOME	122	0.702414	3.03915	0	0	0
MALONEY_RESPONSE_TO_17AAG_DN	71	0.764919	3.03617	0	0	0
GO_LARGE_RIBOSOMAL_SUBUNIT	90	0.730667	3.01145	0	0	0
GO_CYTOSOLIC_PART	175	0.67434	2.97964	0	0	0
GO_RRNA_METABOLIC_PROCESS	243	0.646142	2.9674	0	0	0
REACTOME_FORMATION_OF_THE_TERNARY_COMPLEX_AND_SUBSEQUENTLY_THE_43S_COMPLEX	46	0.82545	2.96231	0	0	0
GO_PEPTIDE_METABOLIC_PROCESS	457	0.612825	2.9587	0	0	0
GO_AMIDE_BIOSYNTHETIC_PROCESS	425	0.611048	2.94869	0	0	0
GO_RIBONUCLEOPROTEIN_COMPLEX_BIOGENESIS	408	0.612136	2.94155	0	0	0
WONG_EMBRYONIC_STEM_CELL_CORE	315	0.617725	2.93697	0	0	0
BILANGES_SERUM_AND_RAPAMYCIN_SENSITIVE_GENES	63	0.77687	2.9359	0	0	0
GO_RIBOSOME_BIOGENESIS	291	0.627768	2.93307	0	0	0
CHNG_MULTIPLE_MYELOMA_HYPERPLOID_UP	47	0.785699	2.90968	0	0	0
PECE_MAMMARY_STEM_CELL_UP	117	0.687626	2.90009	0	0	0
GO_VIRAL_LIFE_CYCLE	240	0.628389	2.89857	0	0	0
REACTOME_ER_PHAGOSOME_PATHWAY	51	0.793833	2.88354	0	0	0
WANG_TUMOR_INVASIVENESS_UP	325	0.61019	2.87924	0	0	0
GO_RNA_CATABOLIC_PROCESS	206	0.633498	2.87794	0	0	0
TIEN_INTESTINE_PROBIOTICS_6HR_UP	52	0.778592	2.87601	0	0	0
ZHONG_SECRETOME_OF_LUNG_CANCER_AND_FIBROBLAST	101	0.689141	2.87479	0	0	0
SANA_RESPONSE_TO_IFNG_DN	69	0.735415	2.87227	0	0	0
LEE_LIVER_CANCER_SURVIVAL_DN	158	0.650218	2.86544	0	0	0
OUELLET_OVARIAN_CANCER_INVASIVE_VS_LMP_UP	111	0.683453	2.85898	0	0	0
GO_SMALL_RIBOSOMAL_SUBUNIT	62	0.758343	2.85858	0	0	0
REACTOME_CYCLIN_E_ASSOCIATED_EVENTS_DURING_G1_S_TRANSITION_	60	0.741774	2.84792	0	0	0
LI_AMPLIFIED_IN_LUNG_CANCER	133	0.667392	2.84592	0	0	0
GO_ANTIGEN_PROCESSING_AND_PRESENTATION_OF_PEPTIDE_ANTIGEN_VIA_MHC_CLASS_I	69	0.730999	2.84568	0	0	0
REACTOME_VIF_MEDIATED_DEGRADATION_OF_APOBEC3G	46	0.784661	2.84035	0	0	0
PENG_GLUTAMINE_DEPRIVATION_DN	306	0.604325	2.84004	0	0	0
REACTOME_ANTIGEN_PROCESSING_CROSS_PRESENTATION	59	0.760992	2.83097	0	0	0
SESTO_RESPONSE_TO_UV_C0	92	0.69288	2.82753	0	0	0
CHIANG_LIVER_CANCER_SUBCLASS_UNANNOTATED_DN	178	0.635005	2.82655	0	0	0
REACTOME_ORC1_REMOVAL_FROM_CHROMATIN	62	0.734054	2.81306	0	0	0
GO_CYTOSOLIC_SMALL_RIBOSOMAL_SUBUNIT	38	0.813415	2.81071	0	0	0
PENG_RAPAMYCIN_RESPONSE_DN	225	0.617932	2.80824	0	0	0
PENG_LEUCINE_DEPRIVATION_DN	172	0.631284	2.80654	0	0	0
REACTOME_P53_INDEPENDENT_G1_S_DNA_DAMAGE_CHECKPOINT	46	0.772069	2.80563	0	0	0
TARTE_PLASMA_CELL_VS_PLASMABLAST_DN	277	0.599017	2.80325	0	0	0
DANG_MYC_TARGETS_UP	127	0.657697	2.79989	0	0	0
REACTOME_REGULATION_OF_ORNITHINE_DECARBOXYLASE_ODC	45	0.787439	2.79244	0	0	0
BILANGES_RAPAMYCIN_SENSITIVE_VIA_TSC1_AND_TSC2	64	0.72716	2.79067	0	0	0
REACTOME_CDK_MEDIATED_PHOSPHORYLATION_AND_REMOVAL_OF_CDC6	44	0.789692	2.78312	0	0	0
REACTOME_SCF_BETA_TRCP_MEDIATED_DEGRADATION_OF_EMI1	47	0.770069	2.77911	0	0	0
REACTOME_DESTABILIZATION_OF_MRNA_BY_AUF1_HNRNP_D0	48	0.762847	2.77817	0	0	0
REACTOME_AUTODEGRADATION_OF_THE_E3_UBIQUITIN_LIGASE_COP1	45	0.774062	2.77615	0	0	0
REACTOME_SCFSKP2_MEDIATED_DEGRADATION_OF_P27_P21	51	0.751057	2.77083	0	0	0
GO_ESTABLISHMENT_OF_PROTEIN_LOCALIZATION_TO_MEMBRANE	224	0.603252	2.76653	0	0	0
GO_ANTIGEN_PROCESSING_AND_PRESENTATION_OF_EXOGENOUS_PEPTIDE_ANTIGEN_VIA_MHC_CLASS_I	49	0.759838	2.76046	0	0	0
SCHLOSSER_MYC_TARGETS_REPRESSED_BY_SERUM	153	0.631557	2.75781	0	0	0
REACTOME_CROSS_PRESENTATION_OF_SOLUBLE_EXOGENOUS_ANTIGENS_ENDOSOMES	41	0.779594	2.74768	0	0	0
REACTOME_CDT1_ASSOCIATION_WITH_THE_CDC6_ORC_ORIGIN_COMPLEX	52	0.753562	2.74722	0	0	0
GO_SPLICEOSOMAL_COMPLEX	160	0.621523	2.7458	0	0	0
SEIDEN_ONCOGENESIS_BY_MET	80	0.687053	2.73459	0	0	0
KEGG_PROTEASOME	40	0.796778	2.73455	0	0	0
GO_PROTEASOME_COMPLEX	72	0.692319	2.73226	0	0	0
REACTOME_APC_C_CDC20_MEDIATED_DEGRADATION_OF_MITOTIC_PROTEINS	63	0.713244	2.72346	0	0	0
REACTOME_P53_DEPENDENT_G1_DNA_DAMAGE_RESPONSE	51	0.731912	2.71297	0	0	0
IGLESIAS_E2F_TARGETS_UP	98	0.654678	2.71288	0	0	0
REACTOME_ASSEMBLY_OF_THE_PRE_REPLICATIVE_COMPLEX	61	0.721013	2.71034	0	0	0
GO_REGULATION_OF_CELLULAR_AMINO_ACID_METABOLIC_PROCESS	53	0.714882	2.69994	0	0	0
GO_MYELIN_SHEATH	122	0.633502	2.69743	0	0	0
REACTOME_TCA_CYCLE_AND_RESPIRATORY_ELECTRON_TRANSPORT	112	0.63941	2.67359	0	0	0
GO_RIBONUCLEOPROTEIN_COMPLEX_SUBUNIT_ORGANIZATION	178	0.601259	2.66838	0	0	0
REACTOME_REGULATION_OF_MRNA_STABILITY_BY_PROTEINS_THAT_BIND_AU_RICH_ELEMENTS	77	0.681396	2.66512	0	0	0
ENK_UV_RESPONSE_KERATINOCYTE_UP	400	0.552241	2.6599	0	0	0
REACTOME_AUTODEGRADATION_OF_CDH1_BY_CDH1_APC_C	55	0.714731	2.65535	0	0	0
GO_ANAPHASE_PROMOTING_COMPLEX_DEPENDENT_CATABOLIC_PROCESS	73	0.67726	2.6543	0	0	0
LAIHO_COLORECTAL_CANCER_SERRATED_UP	94	0.64586	2.65089	0	0	0
REACTOME_G1_S_TRANSITION	104	0.635398	2.64805	0	0	0
RHODES_CANCER_META_SIGNATURE	60	0.700372	2.64634	0	0	0
WONG_MITOCHONDRIA_GENE_MODULE	206	0.583092	2.64506	0	0	0
DAZARD_RESPONSE_TO_UV_SCC_UP	104	0.643233	2.64259	0	0	0
REACTOME_APC_C_CDH1_MEDIATED_DEGRADATION_OF_CDC20_AND_OTHER_APC_C_CDH1_TARGETED_PROTEINS_IN_LATE_MITOSIS_EARLY_G1	62	0.696503	2.63916	0	0	0
RHEIN_ALL_GLUCOCORTICOID_THERAPY_DN	325	0.552746	2.63532	0	0	0
REACTOME_REGULATION_OF_MITOTIC_CELL_CYCLE	74	0.676736	2.63409	0	0	0
GO_RNA_SPLICING_VIA_TRANSESTERIFICATION_REACTIONS	250	0.570578	2.62931	0	0	0
ZHOU_TNF_SIGNALING_4HR	48	0.706036	2.6275	0	0	0
YAO_TEMPORAL_RESPONSE_TO_PROGESTERONE_CLUSTER_17	167	0.592753	2.62437	0	0	0
GO_NCRNA_PROCESSING	359	0.547128	2.62338	0	0	0
GO_ENERGY_DERIVATION_BY_OXIDATION_OF_ORGANIC_COMPOUNDS	174	0.588248	2.61973	0	0	0
GO_RESPIRATORY_CHAIN	71	0.667102	2.61665	0	0	0
GO_CELLULAR_RESPIRATION	126	0.608778	2.61531	0	0	0
REACTOME_SIGNALING_BY_WNT	59	0.698287	2.61434	0	0	0
REACTOME_REGULATION_OF_APOPTOSIS	50	0.720246	2.61384	0	0	0
GO_PIGMENT_GRANULE	83	0.656264	2.6122	0	0	0
KEGG_OXIDATIVE_PHOSPHORYLATION	99	0.633566	2.61219	0	0	0
LUI_THYROID_CANCER_PAX8_PPARG_DN	44	0.730214	2.60689	0	0	0
REACTOME_S_PHASE	101	0.631184	2.60678	0	0	0
GO_CATALYTIC_STEP_2_SPLICEOSOME	85	0.654057	2.60459	0	0	0
GO_TRANSLATION_FACTOR_ACTIVITY_RNA_BINDING	76	0.667474	2.59857	0	0	0
GO_INNER_MITOCHONDRIAL_MEMBRANE_PROTEIN_COMPLEX	96	0.628999	2.59855	0	0	0
REACTOME_MRNA_SPLICING	106	0.626492	2.5985	0	0	0
GO_RNA_SPLICING	329	0.543942	2.5977	0	0	0
GO_REGULATION_OF_RNA_STABILITY	119	0.617589	2.59471	0	0	0
KEGG_PARKINSONS_DISEASE	94	0.639369	2.59072	0	0	0
BORCZUK_MALIGNANT_MESOTHELIOMA_UP	285	0.555072	2.58593	0	0	0
ZHONG_SECRETOME_OF_LUNG_CANCER_AND_MACROPHAGE	60	0.678426	2.58336	0	0	0
ZHU_CMV_24_HR_UP	81	0.646548	2.58299	0	0	0
GO_CYTOPLASMIC_TRANSLATION	39	0.744559	2.58281	0	0	0
SHIPP_DLBCL_VS_FOLLICULAR_LYMPHOMA_UP	41	0.735082	2.57017	0	0	0
REACTOME_RESPIRATORY_ELECTRON_TRANSPORT	63	0.673041	2.56284	0	0	0
GO_RIBOSOMAL_LARGE_SUBUNIT_BIOGENESIS	47	0.706618	2.56184	0	0	0
FERRANDO_T_ALL_WITH_MLL_ENL_FUSION_DN	71	0.655972	2.55788	0	0	0
GO_TRANSLATION_INITIATION_FACTOR_ACTIVITY	45	0.713868	2.55763	0	0	0
MOOTHA_VOXPHOS	84	0.631953	2.55699	0	0	0
BIOCARTA_PROTEASOME_PATHWAY	28	0.785502	2.55628	0	0	0
GO_ESTABLISHMENT_OF_PROTEIN_LOCALIZATION_TO_ORGANELLE	318	0.541806	2.55609	0	0	0
BASSO_B_LYMPHOCYTE_NETWORK	119	0.609253	2.55597	0	0	0
TAKAO_RESPONSE_TO_UVB_RADIATION_UP	80	0.645217	2.55555	0	0	0
LUI_TARGETS_OF_PAX8_PPARG_FUSION	33	0.763247	2.54972	0	0	0
REACTOME_RESPIRATORY_ELECTRON_TRANSPORT_ATP_SYNTHESIS_BY_CHEMIOSMOTIC_COUPLING_AND_HEAT_PRODUCTION_BY_UNCOUPLING_PROTEINS_	78	0.651161	2.54533	0	0	0
GO_PROTEIN_TARGETING	348	0.535627	2.54412	0	0	0
REACTOME_ACTIVATION_OF_NF_KAPPAB_IN_B_CELLS	57	0.680203	2.54266	0	0	0
STARK_PREFRONTAL_CORTEX_22Q11_DELETION_DN	436	0.527507	2.54138	0	0	0
BHATTACHARYA_EMBRYONIC_STEM_CELL	68	0.651745	2.53962	0	0	0
ZHU_CMV_ALL_UP	101	0.617887	2.5389	0	0	0
YAO_TEMPORAL_RESPONSE_TO_PROGESTERONE_CLUSTER_10	64	0.671041	2.53871	0	0	0
REACTOME_SYNTHESIS_OF_DNA	86	0.628706	2.5355	0	0	0
YAO_TEMPORAL_RESPONSE_TO_PROGESTERONE_CLUSTER_13	160	0.574697	2.53453	0	0	0
REACTOME_HOST_INTERACTIONS_OF_HIV_FACTORS	108	0.610481	2.53415	0	0	0
YAMASHITA_LIVER_CANCER_WITH_EPCAM_UP	44	0.71325	2.53313	0	0	0
WELCSH_BRCA1_TARGETS_UP	164	0.576562	2.53296	0	0	0
FLECHNER_BIOPSY_KIDNEY_TRANSPLANT_OK_VS_DONOR_UP	466	0.524023	2.53211	0	0	0
REACTOME_PROCESSING_OF_CAPPED_INTRON_CONTAINING_PRE_MRNA	135	0.589515	2.52789	0	0	0
GO_RIBOSOME_ASSEMBLY	49	0.693441	2.52351	0	0	0
HILLION_HMGA1B_TARGETS	65	0.650427	2.52249	0	0	0
ZAMORA_NOS2_TARGETS_UP	60	0.666034	2.51911	0	0	0
GUTIERREZ_MULTIPLE_MYELOMA_UP	30	0.777473	2.51834	0	0	0
MOOTHA_PGC	351	0.530894	2.51496	0	0	0
CHAUHAN_RESPONSE_TO_METHOXYESTRADIOL_DN	88	0.617503	2.51328	0	0	0
CHANG_CORE_SERUM_RESPONSE_UP	191	0.5575	2.51066	0	0	0
KARLSSON_TGFB1_TARGETS_UP	112	0.601115	2.51004	0	0	0
DAIRKEE_CANCER_PRONE_RESPONSE_BPA_E2	89	0.629176	2.50801	0	0	0
REACTOME_CELL_CYCLE_CHECKPOINTS	109	0.597765	2.50479	0	0	0
YAO_TEMPORAL_RESPONSE_TO_PROGESTERONE_CLUSTER_11	84	0.631184	2.50286	0	0	0
GO_REGULATION_OF_CELLULAR_AMINE_METABOLIC_PROCESS	63	0.656971	2.49787	0	0	0
GO_STRUCTURAL_MOLECULE_ACTIVITY	424	0.517245	2.49778	0	0	0
PELLICCIOTTA_HDAC_IN_ANTIGEN_PRESENTATION_UP	58	0.659482	2.49691	0	0	0
ZHOU_TNF_SIGNALING_30MIN	46	0.695422	2.49348	0	0	0
GO_ORGANIC_CYCLIC_COMPOUND_CATABOLIC_PROCESS	319	0.523896	2.49145	0	0	0
BERENJENO_TRANSFORMED_BY_RHOA_UP	468	0.509883	2.49114	0	0	0
YAO_TEMPORAL_RESPONSE_TO_PROGESTERONE_CLUSTER_14	124	0.587534	2.49085	0	0	0
KIM_ALL_DISORDERS_CALB1_CORR_UP	414	0.517995	2.48981	0	0	0
REACTOME_MITOTIC_G1_G1_S_PHASES	124	0.584024	2.48934	0	0	0
FLOTHO_PEDIATRIC_ALL_THERAPY_RESPONSE_UP	47	0.685907	2.48721	0	0	0
JIANG_AGING_HYPOTHALAMUS_UP	41	0.707128	2.48582	0	0	0
REACTOME_M_G1_TRANSITION	76	0.634065	2.48457	0	0	0
GO_AEROBIC_RESPIRATION	44	0.69034	2.48447	0	0	0
LUI_THYROID_CANCER_CLUSTER_3	28	0.776595	2.47968	0	0	0
TIEN_INTESTINE_PROBIOTICS_24HR_DN	197	0.548651	2.47851	0	0	0
GO_PROTEIN_FOLDING	174	0.555379	2.47813	0	0	0
RHODES_UNDIFFERENTIATED_CANCER	64	0.656709	2.47619	0	0	0
GO_OXIDOREDUCTASE_COMPLEX	80	0.629497	2.47201	0	0	0
GO_MITOCHONDRIAL_MEMBRANE_PART	146	0.56205	2.47108	0	0	0
PELLICCIOTTA_HDAC_IN_ANTIGEN_PRESENTATION_DN	45	0.703011	2.4698	0	0	0
GRADE_COLON_AND_RECTAL_CANCER_UP	254	0.534644	2.46951	0	0	0
DAZARD_UV_RESPONSE_CLUSTER_G1	50	0.674221	2.46712	0	0	0
GO_PROTEASOME_ACCESSORY_COMPLEX	24	0.787232	2.46375	0	0	0
SPIRA_SMOKERS_LUNG_CANCER_UP	27	0.764421	2.46173	0	0	0
TARTE_PLASMA_CELL_VS_B_LYMPHOCYTE_UP	62	0.64284	2.45929	0	0	0
GO_OXIDATIVE_PHOSPHORYLATION	77	0.628903	2.44941	0	0	0
GO_GENERATION_OF_PRECURSOR_METABOLITES_AND_ENERGY	220	0.540353	2.44888	0	0	0
ROME_INSULIN_TARGETS_IN_MUSCLE_UP	372	0.516176	2.44885	0	0	0
GO_TRANSLATIONAL_ELONGATION	105	0.592022	2.44588	0	0	0
REACTOME_MRNA_PROCESSING	151	0.563252	2.44412	0	0	0
ALONSO_METASTASIS_UP	162	0.559081	2.44164	0	0	0
GO_MRNA_PROCESSING	374	0.509822	2.44106	0	0	0
GO_MITOCHONDRIAL_PROTEIN_COMPLEX	122	0.573635	2.44096	0	0	0
HONMA_DOCETAXEL_RESISTANCE	32	0.725689	2.43667	0	0	0
GO_INNATE_IMMUNE_RESPONSE_ACTIVATING_CELL_SURFACE_RECEPTOR_SIGNALING_PATHWAY	84	0.606271	2.43587	0	0	0
GO_REGULATION_OF_PROTEIN_UBIQUITINATION_INVOLVED_IN_UBIQUITIN_DEPENDENT_PROTEIN_CATABOLIC_PROCESS	96	0.599733	2.43536	0	0	0
GO_PROTEIN_LOCALIZATION_TO_MEMBRANE	290	0.522399	2.43507	0	0	0
ZHANG_RESPONSE_TO_CANTHARIDIN_DN	65	0.636531	2.43341	0	0	0
IRITANI_MAD1_TARGETS_DN	45	0.682938	2.43331	0	0	0
GO_UNFOLDED_PROTEIN_BINDING	80	0.610683	2.43323	0	0	0
MOOTHA_HUMAN_MITODB_6_2002	380	0.503516	2.42441	0	0	0
BOYAULT_LIVER_CANCER_SUBCLASS_G3_UP	182	0.540311	2.42411	0	0	0
REACTOME_METABOLISM_OF_AMINO_ACIDS_AND_DERIVATIVES	133	0.563176	2.4213	0	0	0
JISON_SICKLE_CELL_DISEASE_DN	152	0.556942	2.42054	0	0	0
FLECHNER_PBL_KIDNEY_TRANSPLANT_OK_VS_DONOR_UP	128	0.567803	2.41848	0	0	0
GO_MITOCHONDRIAL_RESPIRATORY_CHAIN_COMPLEX_I_BIOGENESIS	51	0.651088	2.41642	0	0	0
GRADE_METASTASIS_DN	40	0.695806	2.41618	0	0	0
GO_NCRNA_METABOLIC_PROCESS	478	0.497263	2.41509	0	0	0
JIANG_AGING_CEREBRAL_CORTEX_DN	44	0.672199	2.41425	0	0	0
GO_CELL_SUBSTRATE_JUNCTION	329	0.511308	2.41175	0	0	0
GARY_CD5_TARGETS_DN	399	0.501015	2.41141	0	0	0
PHONG_TNF_TARGETS_UP	47	0.657881	2.41059	0	0	0
WINTER_HYPOXIA_METAGENE	171	0.539681	2.4082	0	0	0
DAZARD_RESPONSE_TO_UV_NHEK_UP	173	0.541514	2.40726	0	0	0
DITTMER_PTHLH_TARGETS_UP	99	0.587938	2.40696	0	0	0
MENSSEN_MYC_TARGETS	51	0.653824	2.40651	0	0	0
PAL_PRMT5_TARGETS_UP	181	0.538029	2.40396	0	0	0
MOOTHA_MITOCHONDRIA	390	0.501738	2.40098	0	0	0
GO_NADH_DEHYDROGENASE_COMPLEX	41	0.675729	2.39975	0	0	0
SESTO_RESPONSE_TO_UV_C1	58	0.63477	2.39605	0	0	0
CUI_GLUCOSE_DEPRIVATION	46	0.650065	2.39524	0	0	0
GO_NEGATIVE_REGULATION_OF_PROTEIN_MODIFICATION_BY_SMALL_PROTEIN_CONJUGATION_OR_REMOVAL	128	0.556901	2.3869	0	0	0
GO_NAD_BINDING	45	0.665274	2.38568	0	0	0
BENPORATH_MYC_TARGETS_WITH_EBOX	183	0.535301	2.38401	0	0	0
GO_SMALL_NUCLEAR_RIBONUCLEOPROTEIN_COMPLEX	59	0.635365	2.3835	0	0	0
GAVIN_FOXP3_TARGETS_CLUSTER_T7	83	0.591016	2.37789	0	0	0
GO_POSTTRANSCRIPTIONAL_REGULATION_OF_GENE_EXPRESSION	363	0.496407	2.37776	0	0	0
NATSUME_RESPONSE_TO_INTERFERON_BETA_DN	40	0.678515	2.37669	0	0	0
GO_OXIDOREDUCTASE_ACTIVITY_ACTING_ON_NAD_P_H_QUINONE_OR_SIMILAR_COMPOUND_AS_ACCEPTOR	47	0.660511	2.37425	0	0	0
HINATA_NFKB_TARGETS_KERATINOCYTE_UP	57	0.644604	2.37267	0	0	0
ZHONG_SECRETOME_OF_LUNG_CANCER_AND_ENDOTHELIUM	52	0.650869	2.37219	0	0	0
GO_TRANSLATIONAL_TERMINATION	89	0.596899	2.36944	0	0	0
GO_REGULATION_OF_ESTABLISHMENT_OF_PLANAR_POLARITY	85	0.588839	2.36837	0	0	0
MORI_IMMATURE_B_LYMPHOCYTE_DN	85	0.59099	2.36834	0	0	0
GO_MITOCHONDRIAL_TRANSLATION	104	0.56489	2.36764	0	0	0
HINATA_NFKB_TARGETS_FIBROBLAST_UP	57	0.628298	2.36586	0	0	0
GO_ELECTRON_TRANSPORT_CHAIN	87	0.586736	2.36534	0	0	0
MORI_PRE_BI_LYMPHOCYTE_UP	63	0.614463	2.36497	0	0	0
GO_NUCLEOSIDE_TRIPHOSPHATE_METABOLIC_PROCESS	180	0.527426	2.36061	0	0	0
ZUCCHI_METASTASIS_DN	36	0.688207	2.3604	0	0	0
YAO_TEMPORAL_RESPONSE_TO_PROGESTERONE_CLUSTER_12	61	0.617096	2.35604	0	0	0
KEGG_HUNTINGTONS_DISEASE	147	0.542735	2.35423	0	0	0
GO_POSITIVE_REGULATION_OF_LIGASE_ACTIVITY	99	0.580527	2.35396	0	0	0
GO_NIK_NF_KAPPAB_SIGNALING	73	0.608688	2.35383	0	0	0
GO_ORGANELLE_INNER_MEMBRANE	425	0.491294	2.35285	0	0	0
RAHMAN_TP53_TARGETS_PHOSPHORYLATED	21	0.781289	2.35231	0	0	0
MATTIOLI_MGUS_VS_PCL	86	0.573102	2.35215	0	0	0
HILLION_HMGA1_TARGETS	60	0.622063	2.35139	0	0	0
KEGG_ALZHEIMERS_DISEASE	127	0.554173	2.35093	0	0	0
MORI_LARGE_PRE_BII_LYMPHOCYTE_UP	78	0.592333	2.34818	0	0	0
GO_RRNA_BINDING	53	0.632623	2.34688	0	0	0
BAE_BRCA1_TARGETS_UP	63	0.615716	2.34614	0	0	0
GEISS_RESPONSE_TO_DSRNA_UP	29	0.718878	2.34552	0	0	0
GO_REGULATION_OF_TRANSLATIONAL_INITIATION	73	0.602581	2.34315	0	0	0
REACTOME_MRNA_SPLICING_MINOR_PATHWAY	42	0.668118	2.34264	0	0	0
GO_REGULATION_OF_OXIDATIVE_STRESS_INDUCED_CELL_DEATH	34	0.701689	2.33845	0	0	0
BOHN_PRIMARY_IMMUNODEFICIENCY_SYNDROM_UP	36	0.68142	2.33582	0	0	0
TIEN_INTESTINE_PROBIOTICS_2HR_UP	25	0.740528	2.33522	0	0	0
SHAFFER_IRF4_TARGETS_IN_MYELOMA_VS_MATURE_B_LYMPHOCYTE	92	0.574207	2.33273	0	0	0
MUELLER_PLURINET	268	0.501938	2.3324	0	0	0
REN_ALVEOLAR_RHABDOMYOSARCOMA_DN	335	0.493452	2.33152	0	0	0
GO_REGULATION_OF_LIGASE_ACTIVITY	118	0.545854	2.32979	0	1.31213e-05	0.001
REACTOME_HIV_INFECTION	173	0.527331	2.32935	0	0	0
GO_ORGANELLAR_RIBOSOME	69	0.59272	2.32407	0	1.29705e-05	0.001
ONKEN_UVEAL_MELANOMA_DN	415	0.481797	2.32333	0	0	0
GO_MITOCHONDRIAL_RESPIRATORY_CHAIN_COMPLEX_ASSEMBLY	63	0.610774	2.32269	0	1.28231e-05	0.001
WANG_TUMOR_INVASIVENESS_DN	180	0.522069	2.31982	0	0	0
GO_POSITIVE_REGULATION_OF_DNA_BIOSYNTHETIC_PROCESS	47	0.634297	2.3169	0	1.2679e-05	0.001
GO_POSITIVE_REGULATION_OF_CELLULAR_PROTEIN_CATABOLIC_PROCESS	165	0.523355	2.31668	0	1.25381e-05	0.001
WELCSH_BRCA1_TARGETS_DN	134	0.543101	2.31344	0	0	0
JIANG_HYPOXIA_CANCER	67	0.598724	2.31292	0	0	0
REACTOME_DOWNSTREAM_SIGNALING_EVENTS_OF_B_CELL_RECEPTOR_BCR	86	0.57945	2.31277	0	0	0
KEEN_RESPONSE_TO_ROSIGLITAZONE_DN	69	0.592081	2.31091	0	0	0
GO_ENDOPLASMIC_RETICULUM_LUMEN	115	0.552647	2.30819	0	1.24004e-05	0.001
KEGG_CITRATE_CYCLE_TCA_CYCLE	27	0.716986	2.30597	0	0	0
DACOSTA_UV_RESPONSE_VIA_ERCC3_COMMON_UP	64	0.60436	2.3038	0	0	0
GOTZMANN_EPITHELIAL_TO_MESENCHYMAL_TRANSITION_DN	147	0.527437	2.30362	0	0	0
ALCALA_APOPTOSIS	67	0.586345	2.30327	0	0	0
GO_ANTIGEN_PROCESSING_AND_PRESENTATION_OF_PEPTIDE_ANTIGEN	131	0.535304	2.29988	0	1.22656e-05	0.001
HAHTOLA_MYCOSIS_FUNGOIDES_SKIN_UP	135	0.537502	2.29838	0	0	0
HOLLEMAN_VINCRISTINE_RESISTANCE_ALL_DN	18	0.794325	2.29704	0	0	0
GO_NEGATIVE_REGULATION_OF_RNA_SPLICING	23	0.744294	2.29569	0	2.40608e-05	0.002
FLECHNER_BIOPSY_KIDNEY_TRANSPLANT_REJECTED_VS_OK_DN	402	0.478005	2.29548	0	0	0
LI_DCP2_BOUND_MRNA	83	0.575335	2.29516	0	0	0
GO_POSITIVE_REGULATION_OF_TELOMERE_MAINTENANCE_VIA_TELOMERE_LENGTHENING	30	0.692637	2.29429	0	2.38048e-05	0.002
TIAN_TNF_SIGNALING_VIA_NFKB	22	0.752488	2.29414	0	0	0
WEST_ADRENOCORTICAL_TUMOR_UP	273	0.48931	2.29403	0	0	0
GO_OXIDOREDUCTASE_ACTIVITY_ACTING_ON_NAD_P_H	73	0.582055	2.28682	0	2.35542e-05	0.002
WINNEPENNINCKX_MELANOMA_METASTASIS_UP	151	0.522321	2.28596	0	0	0
GO_PRECATALYTIC_SPLICEOSOME	22	0.753682	2.28374	0	2.33089e-05	0.002
MARTINEZ_RESPONSE_TO_TRABECTEDIN_UP	54	0.617724	2.28255	0	0	0
JIANG_HYPOXIA_VIA_VHL	34	0.684415	2.28214	0	0	0
GO_REGULATION_OF_TELOMERASE_RNA_LOCALIZATION_TO_CAJAL_BODY	15	0.827368	2.27935	0	2.30686e-05	0.002
SAKAI_TUMOR_INFILTRATING_MONOCYTES_DN	70	0.593739	2.27918	0	0	0
GO_REGULATION_OF_RESPONSE_TO_OXIDATIVE_STRESS	45	0.625527	2.27809	0	2.28332e-05	0.002
GO_REGULATION_OF_MRNA_SPLICING_VIA_SPLICEOSOME	51	0.609944	2.27807	0	2.26025e-05	0.002
KIM_MYC_AMPLIFICATION_TARGETS_UP	151	0.523841	2.27799	0	0	0
MOHANKUMAR_TLX1_TARGETS_UP	355	0.47635	2.27589	0	0	0
KAAB_FAILED_HEART_ATRIUM_DN	124	0.538637	2.27546	0	0	0
SWEET_KRAS_ONCOGENIC_SIGNATURE	70	0.589033	2.27057	0	0	0
DORN_ADENOVIRUS_INFECTION_48HR_DN	34	0.670796	2.26882	0	0	0
MISSIAGLIA_REGULATED_BY_METHYLATION_UP	91	0.553646	2.26519	0	0	0
REACTOME_CYTOSOLIC_TRNA_AMINOACYLATION	24	0.71993	2.26246	0	0	0
DARWICHE_PAPILLOMA_RISK_LOW_UP	98	0.552155	2.26227	0	0	0
FOURNIER_ACINAR_DEVELOPMENT_LATE_2	255	0.487451	2.26203	0	0	0
DORN_ADENOVIRUS_INFECTION_24HR_DN	38	0.659281	2.26062	0	0	0
GO_TRICARBOXYLIC_ACID_METABOLIC_PROCESS	31	0.701605	2.25934	0	2.23765e-05	0.002
KIM_ALL_DISORDERS_DURATION_CORR_DN	118	0.536544	2.259	0	0	0
HARRIS_HYPOXIA	54	0.614185	2.25439	0	0	0
DIAZ_CHRONIC_MEYLOGENOUS_LEUKEMIA_DN	54	0.606201	2.25346	0	0	0
GOLDRATH_ANTIGEN_RESPONSE	259	0.488556	2.25175	0	0	0
GO_RIBOSOMAL_LARGE_SUBUNIT_ASSEMBLY	22	0.743787	2.25163	0	2.2155e-05	0.002
GO_NEGATIVE_REGULATION_OF_MRNA_METABOLIC_PROCESS	33	0.674949	2.25064	0	2.19378e-05	0.002
MORI_PLASMA_CELL_UP	42	0.636857	2.24767	0	0	0
HEDENFALK_BREAST_CANCER_BRCA1_VS_BRCA2	144	0.513993	2.24711	0	0	0
GO_NUCLEOSIDE_MONOPHOSPHATE_METABOLIC_PROCESS	197	0.497752	2.24631	0	2.17248e-05	0.002
GO_HYDROGEN_ION_TRANSMEMBRANE_TRANSPORT	69	0.577677	2.24602	0	2.15159e-05	0.002
NGO_MALIGNANT_GLIOMA_1P_LOH	16	0.805942	2.24462	0	0	0
GO_PROTEIN_LOCALIZATION_TO_ORGANELLE	478	0.461552	2.24155	0	2.1311e-05	0.002
GO_ANTIGEN_PROCESSING_AND_PRESENTATION	151	0.51379	2.24137	0	2.11099e-05	0.002
GO_INTRAMOLECULAR_OXIDOREDUCTASE_ACTIVITY	39	0.648783	2.24094	0	2.09126e-05	0.002
POMEROY_MEDULLOBLASTOMA_PROGNOSIS_DN	41	0.639243	2.24059	0	1.10649e-05	0.002
TOOKER_GEMCITABINE_RESISTANCE_DN	111	0.530635	2.24057	0	1.10134e-05	0.002
PID_MYC_ACTIV_PATHWAY	70	0.572848	2.24054	0	1.09624e-05	0.002
NING_CHRONIC_OBSTRUCTIVE_PULMONARY_DISEASE_UP	108	0.545034	2.23786	0	1.09119e-05	0.002
MARKEY_RB1_ACUTE_LOF_UP	204	0.494406	2.23699	0	1.08618e-05	0.002
MODY_HIPPOCAMPUS_PRENATAL	37	0.662754	2.23575	0	1.08122e-05	0.002
SWEET_LUNG_CANCER_KRAS_UP	342	0.473869	2.23552	0	1.07631e-05	0.002
GO_REGULATION_OF_RNA_SPLICING	79	0.56371	2.23519	0	2.0719e-05	0.002
NING_CHRONIC_OBSTRUCTIVE_PULMONARY_DISEASE_DN	93	0.553883	2.23503	0	1.07144e-05	0.002
GO_BINDING_OF_SPERM_TO_ZONA_PELLUCIDA	15	0.808759	2.23458	0	2.05289e-05	0.002
ZHANG_PROLIFERATING_VS_QUIESCENT	42	0.625699	2.23399	0	1.06661e-05	0.002
GO_RIBONUCLEOPROTEIN_COMPLEX_BINDING	88	0.550577	2.23288	0	2.03423e-05	0.002
GO_ANCHORING_JUNCTION	380	0.468559	2.23181	0	2.0159e-05	0.002
YOSHIMURA_MAPK8_TARGETS_DN	291	0.478145	2.23062	0	1.06183e-05	0.002
GO_THREONINE_TYPE_PEPTIDASE_ACTIVITY	17	0.778202	2.2277	0	1.9979e-05	0.002
NADLER_OBESITY_DN	32	0.667641	2.22721	0	1.58695e-05	0.003
SAKAI_CHRONIC_HEPATITIS_VS_LIVER_CANCER_UP	69	0.57771	2.22624	0	1.5799e-05	0.003
LEI_MYB_TARGETS	240	0.482867	2.22592	0	1.57291e-05	0.003
YAMAZAKI_TCEB3_TARGETS_UP	128	0.517634	2.22454	0	1.56598e-05	0.003
GO_NON_CANONICAL_WNT_SIGNALING_PATHWAY	101	0.539001	2.22395	0	1.98022e-05	0.002
GO_CHAPERONE_MEDIATED_PROTEIN_FOLDING	41	0.632478	2.22314	0	1.96285e-05	0.002
GO_U2_TYPE_SPLICEOSOMAL_COMPLEX	28	0.691765	2.22303	0	1.94578e-05	0.002
GO_REGULATION_OF_MRNA_METABOLIC_PROCESS	101	0.534825	2.22299	0	1.92901e-05	0.002
GO_ELECTRON_CARRIER_ACTIVITY	81	0.557212	2.2223	0	1.91252e-05	0.002
GO_RNA_SECONDARY_STRUCTURE_UNWINDING	35	0.661457	2.2208	0	1.89632e-05	0.002
POMEROY_MEDULLOBLASTOMA_DESMOPLASIC_VS_CLASSIC_DN	36	0.647003	2.21573	0	1.55911e-05	0.003
GO_SPERM_EGG_RECOGNITION	16	0.7682	2.21566	0	1.88038e-05	0.002
GO_TUMOR_NECROSIS_FACTOR_MEDIATED_SIGNALING_PATHWAY	80	0.564176	2.21444	0	1.86471e-05	0.002
GO_REGULATION_OF_CELLULAR_KETONE_METABOLIC_PROCESS	120	0.526705	2.21265	0	1.8493e-05	0.002
GO_CARBOHYDRATE_BIOSYNTHETIC_PROCESS	82	0.546991	2.21123	0	1.83414e-05	0.002
BHATI_G2M_ARREST_BY_2METHOXYESTRADIOL_UP	89	0.54661	2.21035	0	2.06915e-05	0.004
JOSEPH_RESPONSE_TO_SODIUM_BUTYRATE_UP	27	0.688616	2.20987	0	2.06016e-05	0.004
LI_LUNG_CANCER	28	0.695285	2.20918	0	2.05124e-05	0.004
BURTON_ADIPOGENESIS_6	145	0.507815	2.20854	0	2.0424e-05	0.004
GO_ALPHA_AMINO_ACID_BIOSYNTHETIC_PROCESS	59	0.59666	2.20595	0	2.71842e-05	0.003
RORIE_TARGETS_OF_EWSR1_FLI1_FUSION_UP	21	0.728938	2.20589	0	2.03363e-05	0.004
GO_T_CELL_RECEPTOR_SIGNALING_PATHWAY	97	0.537984	2.20454	0	2.6965e-05	0.003
REACTOME_CITRIC_ACID_CYCLE_TCA_CYCLE	19	0.740086	2.20142	0	2.02494e-05	0.004
DAIRKEE_TERT_TARGETS_UP	298	0.466712	2.20139	0	2.01632e-05	0.004
GO_NUCLEAR_SPECK	167	0.498138	2.20094	0	2.67492e-05	0.003
TOMIDA_METASTASIS_UP	21	0.724536	2.20046	0	2.00778e-05	0.004
BILANGES_SERUM_RESPONSE_TRANSLATION	28	0.68431	2.20023	0	1.99931e-05	0.004
DORN_ADENOVIRUS_INFECTION_32HR_DN	33	0.654638	2.19952	0	1.99091e-05	0.004
JIANG_AGING_CEREBRAL_CORTEX_UP	27	0.6937	2.19577	0	1.98258e-05	0.004
SEMENZA_HIF1_TARGETS	27	0.700106	2.19566	0	1.97432e-05	0.004
HWANG_PROSTATE_CANCER_MARKERS	21	0.723405	2.19362	0	2.4644e-05	0.005
GO_SPLICEOSOMAL_COMPLEX_ASSEMBLY	50	0.601624	2.19169	0	2.6537e-05	0.003
GO_FORMATION_OF_TRANSLATION_PREINITIATION_COMPLEX	19	0.748689	2.19106	0	2.6328e-05	0.003
KYNG_DNA_DAMAGE_DN	143	0.507637	2.1904	0	2.45422e-05	0.005
SEIDEN_MET_SIGNALING	17	0.767992	2.19014	0	2.44412e-05	0.005
HORIUCHI_WTAP_TARGETS_DN	272	0.467011	2.18909	0	2.4341e-05	0.005
BLALOCK_ALZHEIMERS_DISEASE_INCIPIENT_DN	131	0.513726	2.18882	0	2.42417e-05	0.005
MAHADEVAN_RESPONSE_TO_MP470_DN	15	0.778067	2.18705	0	2.41431e-05	0.005
KIM_LRRC3B_TARGETS	18	0.750757	2.183	0	3.37415e-05	0.007
BIOCARTA_EIF_PATHWAY	16	0.762738	2.18213	0	3.36054e-05	0.007
HOLLEMAN_ASPARAGINASE_RESISTANCE_B_ALL_UP	21	0.720942	2.17835	0	3.82706e-05	0.008
DER_IFN_ALPHA_RESPONSE_UP	59	0.579037	2.17226	0	3.81175e-05	0.008
GO_MRNA_BINDING	126	0.50779	2.17172	0	7.05127e-05	0.008
GO_CELLULAR_AMINO_ACID_BIOSYNTHETIC_PROCESS	64	0.563586	2.17024	0	7.86915e-05	0.009
PRAMOONJAGO_SOX4_TARGETS_DN	47	0.60548	2.16924	0	4.75008e-05	0.01
GO_HYDROGEN_TRANSPORT	87	0.533538	2.16796	0	9.52503e-05	0.011
GO_MONOSACCHARIDE_BINDING	45	0.607377	2.16717	0	9.45232e-05	0.011
SPIELMAN_LYMPHOBLAST_EUROPEAN_VS_ASIAN_UP	434	0.44543	2.16474	0	4.73123e-05	0.01
FERRANDO_T_ALL_WITH_MLL_ENL_FUSION_UP	56	0.574362	2.16402	0	4.71253e-05	0.01
LABBE_WNT3A_TARGETS_UP	67	0.56697	2.16303	0	4.69398e-05	0.01
GO_PRERIBOSOME	58	0.58286	2.16294	0	0.000102392	0.012
GO_DOUBLE_STRANDED_RNA_BINDING	54	0.58319	2.16104	0	0.000101622	0.012
KIM_WT1_TARGETS_12HR_DN	168	0.486771	2.15841	0	5.13843e-05	0.011
REACTOME_FORMATION_OF_TUBULIN_FOLDING_INTERMEDIATES_BY_CCT_TRIC	15	0.79479	2.1581	0	5.11836e-05	0.011
REACTOME_SIGNALING_BY_THE_B_CELL_RECEPTOR_BCR	106	0.517204	2.15634	0	5.09845e-05	0.011
SESTO_RESPONSE_TO_UV_C7	56	0.583644	2.15626	0	5.07868e-05	0.011
GO_U2_SNRNP	19	0.747242	2.15587	0	0.0001261	0.015
BRACHAT_RESPONSE_TO_CAMPTOTHECIN_DN	42	0.611638	2.15212	0	5.05908e-05	0.011
GO_MONOSACCHARIDE_BIOSYNTHETIC_PROCESS	40	0.619645	2.15065	0	0.000133507	0.016
GO_NEGATIVE_REGULATION_OF_MRNA_SPLICING_VIA_SPLICEOSOME	18	0.742622	2.14991	0	0.000132526	0.016
GO_SPLICEOSOMAL_TRI_SNRNP_COMPLEX	26	0.682666	2.14948	0	0.000156092	0.019
GRAHAM_CML_DIVIDING_VS_NORMAL_QUIESCENT_UP	150	0.48938	2.14855	0	5.50279e-05	0.012
DARWICHE_SKIN_TUMOR_PROMOTER_UP	87	0.531179	2.14793	0	5.48171e-05	0.012
GO_MITOCHONDRIAL_MATRIX	345	0.453225	2.14776	0	0.000154961	0.019
JIANG_HYPOXIA_NORMAL	252	0.464874	2.14506	0	5.92107e-05	0.013
REACTOME_APOPTOSIS	122	0.507587	2.14461	0	5.89856e-05	0.013
REACTOME_PYRUVATE_METABOLISM_AND_CITRIC_ACID_TCA_CYCLE	38	0.626881	2.14365	0	5.87621e-05	0.013
GO_PYRUVATE_METABOLIC_PROCESS	43	0.610205	2.14256	0	0.000186032	0.023
REACTOME_MITOTIC_M_M_G1_PHASES	162	0.485882	2.14227	0	6.30068e-05	0.014
GO_POSITIVE_REGULATION_OF_PROTEIN_CATABOLIC_PROCESS	219	0.470113	2.14185	0	0.00019286	0.024
MISSIAGLIA_REGULATED_BY_METHYLATION_DN	112	0.518566	2.14109	0	6.7203e-05	0.015
DORN_ADENOVIRUS_INFECTION_12HR_DN	31	0.641598	2.14054	0	6.69513e-05	0.015
SCHLOSSER_MYC_TARGETS_AND_SERUM_RESPONSE_DN	45	0.595783	2.13913	0	6.67015e-05	0.015
GO_U1_SNRNP	16	0.763207	2.13809	0	0.000191492	0.024
GO_SPLICEOSOMAL_SNRNP_ASSEMBLY	37	0.614387	2.13755	0	0.000197974	0.025
FEVR_CTNNB1_TARGETS_DN	469	0.440914	2.13728	0	7.09093e-05	0.016
GO_POSITIVE_REGULATION_OF_TELOMERE_MAINTENANCE	41	0.620444	2.1332	0	0.00019659	0.025
GO_OXIDOREDUCTASE_ACTIVITY	456	0.440628	2.13119	0	0.000203068	0.026
KEGG_GLYCOLYSIS_GLUCONEOGENESIS	37	0.621757	2.13044	0	7.49603e-05	0.017
WOOD_EBV_EBNA1_TARGETS_DN	39	0.608514	2.12955	0	7.46837e-05	0.017
BLUM_RESPONSE_TO_SALIRASIB_DN	306	0.449924	2.12907	0	7.44091e-05	0.017
HOEBEKE_LYMPHOID_STEM_CELL_DN	65	0.551525	2.12787	0	7.41366e-05	0.017
GO_U4_U6_X_U5_TRI_SNRNP_COMPLEX	21	0.709773	2.12782	0	0.000209358	0.027
GO_RNA_HELICASE_ACTIVITY	60	0.556184	2.12528	0	0.000223244	0.029
BASAKI_YBX1_TARGETS_UP	247	0.45995	2.1236	0	7.82445e-05	0.018
KAMMINGA_EZH2_TARGETS	40	0.609979	2.12312	0	7.796e-05	0.018
GO_NEGATIVE_REGULATION_OF_RESPONSE_TO_OXIDATIVE_STRESS	25	0.6716	2.12225	0	0.000221725	0.029
HOSHIDA_LIVER_CANCER_SUBCLASS_S2	100	0.517339	2.12183	0	7.76776e-05	0.018
GO_POSITIVE_REGULATION_OF_CANONICAL_WNT_SIGNALING_PATHWAY	90	0.524317	2.11948	0	0.000227923	0.03
BAELDE_DIABETIC_NEPHROPATHY_DN	330	0.448036	2.11726	0	8.60879e-05	0.02
NAKAMURA_TUMOR_ZONE_PERIPHERAL_VS_CENTRAL_UP	222	0.46649	2.11707	0	8.57783e-05	0.02
MILI_PSEUDOPODIA_HAPTOTAXIS_UP	471	0.436414	2.11693	0	8.54708e-05	0.02
DARWICHE_SQUAMOUS_CELL_CARCINOMA_UP	96	0.515562	2.11666	0	8.51656e-05	0.02
GO_CYTOPLASMIC_STRESS_GRANULE	28	0.650518	2.11617	0	0.000249269	0.033
NUTT_GBM_VS_AO_GLIOMA_DN	39	0.615869	2.11541	0	8.48625e-05	0.02
GRUETZMANN_PANCREATIC_CANCER_UP	274	0.455691	2.11421	0	8.8749e-05	0.021
GO_CATION_TRANSPORTING_ATPASE_ACTIVITY	39	0.607781	2.11309	0	0.000270199	0.036
KYNG_ENVIRONMENTAL_STRESS_RESPONSE_UP	46	0.593801	2.11305	0	8.84354e-05	0.021
WANG_TARGETS_OF_MLL_CBP_FUSION_DN	39	0.604912	2.11204	0	9.23603e-05	0.022
MCLACHLAN_DENTAL_CARIES_UP	93	0.518082	2.11139	0	0.000100346	0.024
PENG_GLUCOSE_DEPRIVATION_DN	134	0.49707	2.11085	0	9.99952e-05	0.024
GO_DETOXIFICATION	41	0.600901	2.11065	0	0.000275805	0.036
BROWN_MYELOID_CELL_DEVELOPMENT_DN	91	0.522444	2.1106	0	9.96468e-05	0.024
WUNDER_INFLAMMATORY_RESPONSE_AND_CHOLESTEROL_UP	24	0.667817	2.10881	0	0.000103363	0.025
GO_TRANSLATION_PREINITIATION_COMPLEX	15	0.767913	2.10867	0	0.000288728	0.038
SOTIRIOU_BREAST_CANCER_GRADE_1_VS_3_UP	144	0.489562	2.10606	0	0.000107101	0.025
COLLER_MYC_TARGETS_UP	22	0.69817	2.1058	0	0.000106732	0.025
GAJATE_RESPONSE_TO_TRABECTEDIN_UP	54	0.562672	2.10578	0	0.000106365	0.025
SHAFFER_IRF4_TARGETS_IN_PLASMA_CELL_VS_MATURE_B_LYMPHOCYTE	55	0.558732	2.1055	0	0.000106001	0.025
DER_IFN_BETA_RESPONSE_UP	90	0.517345	2.10549	0	0.000105639	0.025
XU_RESPONSE_TO_TRETINOIN_AND_NSC682994_DN	15	0.752657	2.10491	0	0.00010528	0.025
CAFFAREL_RESPONSE_TO_THC_DN	27	0.656498	2.10426	0	0.00011316	0.027
GO_POSITIVE_REGULATION_OF_PROTEIN_MODIFICATION_BY_SMALL_PROTEIN_CONJUGATION_OR_REMOVAL	170	0.475531	2.10324	0	0.000294133	0.039
GO_PROTON_TRANSPORTING_TWO_SECTOR_ATPASE_COMPLEX	38	0.610587	2.103	0	0.000292223	0.039
YAGI_AML_RELAPSE_PROGNOSIS	29	0.656829	2.1029	0	0.000116756	0.028
REACTOME_PREFOLDIN_MEDIATED_TRANSFER_OF_SUBSTRATE_TO_CCT_TRIC	21	0.703611	2.10252	0	0.000116362	0.028
SHEPARD_CRUSH_AND_BURN_MUTANT_UP	159	0.477487	2.10059	0	0.000119957	0.029
MOOTHA_TCA	16	0.750447	2.10014	0	0.000123531	0.03
GO_REGULATION_OF_OXIDATIVE_STRESS_INDUCED_INTRINSIC_APOPTOTIC_SIGNALING_PATHWAY	22	0.694727	2.09721	0	0.000326708	0.043
SANA_TNF_SIGNALING_UP	50	0.583578	2.09609	0	0.000131037	0.032
GO_EUKARYOTIC_TRANSLATION_INITIATION_FACTOR_3_COMPLEX	15	0.777432	2.09606	0	0.000339022	0.045
KEGG_PROTEIN_EXPORT	23	0.675491	2.09384	0	0.000142326	0.035
OSWALD_HEMATOPOIETIC_STEM_CELL_IN_COLLAGEN_GEL_UP	156	0.481838	2.09201	0	0.00016154	0.04
TAKAO_RESPONSE_TO_UVB_RADIATION_DN	88	0.526867	2.08957	0	0.0001728	0.043
HU_ANGIOGENESIS_DN	34	0.623689	2.08951	0	0.000176231	0.044
YU_MYC_TARGETS_UP	40	0.609349	2.08924	0	0.000179599	0.045
LY_AGING_OLD_DN	52	0.568282	2.08616	0	0.000182924	0.046
WIERENGA_PML_INTERACTOME	33	0.622927	2.0858	0	0.000190084	0.048
PROVENZANI_METASTASIS_DN	98	0.509015	2.08538	0	0.000189467	0.048
VIETOR_IFRD1_TARGETS	16	0.733996	2.08508	0	0.000188854	0.048
REACTOME_DNA_REPLICATION	180	0.469078	2.08497	0	0.000188245	0.048
DACOSTA_UV_RESPONSE_VIA_ERCC3_UP	281	0.445708	2.08328	0	0.000187639	0.048
DER_IFN_GAMMA_RESPONSE_UP	59	0.559612	2.08325	0	0.000187038	0.048
DARWICHE_PAPILLOMA_RISK_HIGH_UP	93	0.511488	2.08295	0	0.00018644	0.048
WANG_SMARCE1_TARGETS_DN	281	0.449579	2.08161	0	0.000193348	0.05
LABBE_TGFB1_TARGETS_UP	62	0.550049	2.08079	0	0.000192734	0.05
GO_RIBOSOMAL_SMALL_SUBUNIT_BIOGENESIS	55	0.55692	2.08068	0	0.000472896	0.064
GO_POSITIVE_REGULATION_OF_PROTEOLYSIS	275	0.447179	2.08052	0	0.000469903	0.064
TOOKER_GEMCITABINE_RESISTANCE_UP	68	0.539142	2.0798	0	0.000192124	0.05
PICCALUGA_ANGIOIMMUNOBLASTIC_LYMPHOMA_DN	119	0.494818	2.07963	0	0.000191518	0.05
GO_CELLULAR_PROTEIN_COMPLEX_DISASSEMBLY	112	0.495692	2.07874	0	0.000495357	0.068
OUELLET_CULTURED_OVARIAN_CANCER_INVASIVE_VS_LMP_UP	61	0.551192	2.07685	0	0.000190916	0.05
MORI_MATURE_B_LYMPHOCYTE_DN	57	0.554717	2.07663	0	0.000190317	0.05
GO_RESPONSE_TO_REACTIVE_OXYGEN_SPECIES	138	0.476976	2.07623	0	0.000506501	0.07
REACTOME_RESPONSE_TO_ELEVATED_PLATELET_CYTOSOLIC_CA2_	47	0.577615	2.07611	0	0.000189722	0.05
GO_RESPONSE_TO_ENDOPLASMIC_RETICULUM_STRESS	199	0.452016	2.07557	0	0.000503355	0.07
KEGG_FATTY_ACID_METABOLISM	29	0.632844	2.0746	0	0.000196496	0.052
REACTOME_CLASS_I_MHC_MEDIATED_ANTIGEN_PROCESSING_PRESENTATION	197	0.458126	2.07291	0	0.000207143	0.055
SCHLOSSER_MYC_TARGETS_AND_SERUM_RESPONSE_UP	46	0.577017	2.07244	0	0.000206502	0.055
GO_REGULATION_OF_CELLULAR_PROTEIN_CATABOLIC_PROCESS	237	0.455254	2.07226	0	0.00053513	0.075
BIDUS_METASTASIS_UP	202	0.457406	2.07132	0	0.000209535	0.056
FERNANDEZ_BOUND_BY_MYC	138	0.480988	2.07111	0	0.00020889	0.056
SCHUHMACHER_MYC_TARGETS_UP	76	0.524565	2.07035	0	0.000208249	0.056
JIANG_TIP30_TARGETS_UP	34	0.617485	2.06969	0	0.000207612	0.056
IKEDA_MIR1_TARGETS_UP	49	0.580868	2.06863	0	0.000206979	0.056
GO_PLATELET_DEGRANULATION	52	0.553454	2.06527	0	0.000579944	0.082
GO_NUCLEOTIDE_EXCISION_REPAIR_DNA_DAMAGE_RECOGNITION	22	0.671518	2.06501	0	0.000576407	0.082
NEMETH_INFLAMMATORY_RESPONSE_LPS_UP	67	0.528677	2.06467	0	0.00020635	0.056
ALONSO_METASTASIS_EMT_UP	21	0.686785	2.06462	0	0.000205725	0.056
AMIT_EGF_RESPONSE_60_MCF10A	31	0.623744	2.06406	0	0.000212214	0.058
JIANG_VHL_TARGETS	125	0.484014	2.06388	0	0.000215095	0.059
GO_FC_EPSILON_RECEPTOR_SIGNALING_PATHWAY	106	0.496791	2.06341	0	0.000593472	0.085
GNATENKO_PLATELET_SIGNATURE	34	0.616828	2.0633	0	0.000221608	0.061
RASHI_NFKB1_TARGETS	15	0.7441	2.06303	0	0.000224533	0.062
WU_APOPTOSIS_BY_CDKN1A_VIA_TP53	48	0.571476	2.06291	0	0.000227376	0.063
PID_HIF2PATHWAY	28	0.627868	2.06099	0	0.000240792	0.067
WIELAND_UP_BY_HBV_INFECTION	51	0.561778	2.06044	0	0.000243647	0.068
ABRAMSON_INTERACT_WITH_AIRE	44	0.590397	2.05977	0	0.000246428	0.069
BENPORATH_PROLIFERATION	134	0.483912	2.05973	0	0.000245701	0.069
GO_OXIDOREDUCTASE_ACTIVITY_ACTING_ON_A_SULFUR_GROUP_OF_DONORS	39	0.588641	2.05861	0	0.000644266	0.093
PASINI_SUZ12_TARGETS_DN	225	0.45079	2.05781	0	0.000258965	0.071
GO_MACROMOLECULAR_COMPLEX_DISASSEMBLY	162	0.464313	2.05773	0	0.000647185	0.094
GO_RNA_LOCALIZATION	163	0.467064	2.05771	0	0.000643333	0.094
GO_REGULATION_OF_DNA_BIOSYNTHETIC_PROCESS	71	0.530057	2.05667	0	0.000639526	0.094
YAO_TEMPORAL_RESPONSE_TO_PROGESTERONE_CLUSTER_7	65	0.526036	2.05631	0	0.000265295	0.073
GO_REGULATION_OF_HYDROGEN_PEROXIDE_INDUCED_CELL_DEATH	15	0.744926	2.05484	0	0.00066212	0.097
GO_TOXIN_TRANSPORT	25	0.654366	2.05355	0	0.000658248	0.097
YAMAZAKI_TCEB3_TARGETS_DN	160	0.470285	2.05153	0	0.000274923	0.075
GO_ACTIVATION_OF_INNATE_IMMUNE_RESPONSE	139	0.476879	2.0508	0	0.000674159	0.099
GO_NEGATIVE_REGULATION_OF_TRANSFERASE_ACTIVITY	248	0.441617	2.05061	0	0.000670262	0.099
WOOD_EBV_EBNA1_TARGETS_UP	92	0.507626	2.04987	0	0.000281037	0.077
DIRMEIER_LMP1_RESPONSE_LATE_DN	21	0.674138	2.04969	0	0.000283649	0.078
GO_REGULATION_OF_INTRINSIC_APOPTOTIC_SIGNALING_PATHWAY	106	0.489467	2.0488	0	0.000679186	0.101
KEGG_PENTOSE_PHOSPHATE_PATHWAY	20	0.682768	2.04849	0	0.000286248	0.079
GO_ATP_HYDROLYSIS_COUPLED_TRANSMEMBRANE_TRANSPORT	23	0.668167	2.04651	0	0.000707377	0.106
GO_CELL_CELL_RECOGNITION	18	0.713477	2.04621	0	0.000709748	0.107
DANG_REGULATED_BY_MYC_DN	187	0.455293	2.04578	0	0.000302701	0.083
GO_U12_TYPE_SPLICEOSOMAL_COMPLEX	26	0.646425	2.04489	0	0.000724839	0.11
REACTOME_TRNA_AMINOACYLATION	41	0.581548	2.0432	0	0.000322207	0.089
GO_CELL_REDOX_HOMEOSTASIS	51	0.54672	2.04212	0	0.000765385	0.115
BROWN_MYELOID_CELL_DEVELOPMENT_UP	85	0.508987	2.04177	0	0.00033834	0.093
GO_PRESPLICEOSOME	20	0.681951	2.04027	0	0.000799242	0.121
ISHIDA_E2F_TARGETS	51	0.55462	2.03716	0	0.00036461	0.101
CHEN_LUNG_CANCER_SURVIVAL	19	0.683393	2.03576	0	0.000370388	0.103
GO_ORGANELLAR_SMALL_RIBOSOMAL_SUBUNIT	25	0.643616	2.03536	0	0.000869363	0.133
GO_PURINE_NTP_DEPENDENT_HELICASE_ACTIVITY	87	0.503261	2.0342	0	0.00087074	0.134
GO_ANTIGEN_RECEPTOR_MEDIATED_SIGNALING_PATHWAY	109	0.483702	2.03406	0	0.000865955	0.134
GO_REGULATION_OF_TELOMERE_MAINTENANCE	59	0.54013	2.03186	0	0.000898329	0.139
PROVENZANI_METASTASIS_UP	157	0.460589	2.03186	0	0.000409819	0.113
GOLDRATH_HOMEOSTATIC_PROLIFERATION	154	0.465231	2.03109	0	0.000408655	0.113
GO_U2_TYPE_PRESPLICEOSOME	15	0.732917	2.02968	0	0.000930233	0.144
GO_RIBOSOMAL_SMALL_SUBUNIT_ASSEMBLY	15	0.729125	2.02949	0	0.000925205	0.144
GO_REGULATION_OF_ORGAN_MORPHOGENESIS	157	0.464502	2.02924	0	0.000920231	0.144
GO_ASPARTATE_FAMILY_AMINO_ACID_METABOLIC_PROCESS	40	0.58638	2.02792	0	0.00091531	0.144
REACTOME_GLUCOSE_METABOLISM	51	0.558084	2.0278	0	0.000431166	0.119
GO_OXIDOREDUCTASE_ACTIVITY_ACTING_ON_THE_CH_OH_GROUP_OF_DONORS_NAD_OR_NADP_AS_ACCEPTOR	71	0.522945	2.02777	0	0.000910441	0.144
SANA_TNF_SIGNALING_DN	54	0.543067	2.02758	0	0.000429948	0.119
DIRMEIER_LMP1_RESPONSE_EARLY	47	0.556938	2.02737	0	0.000432121	0.12
KEGG_VIBRIO_CHOLERAE_INFECTION	41	0.578759	2.02724	0	0.000430907	0.12
GROSS_HYPOXIA_VIA_ELK3_ONLY_UP	24	0.644523	2.02608	0	0.000446418	0.124
HOFFMANN_LARGE_TO_SMALL_PRE_BII_LYMPHOCYTE_UP	146	0.465231	2.02586	0	0.000445171	0.124
ZUCCHI_METASTASIS_UP	35	0.588195	2.02505	0	0.000453919	0.127
MUNSHI_MULTIPLE_MYELOMA_UP	63	0.538332	2.02406	0	0.000452658	0.127
GO_NEGATIVE_REGULATION_OF_CANONICAL_WNT_SIGNALING_PATHWAY	112	0.483859	2.02396	0	0.00097711	0.156
GO_MITOCHONDRION_ORGANIZATION	481	0.415914	2.02286	0	0.000971967	0.156
GO_REGULATION_OF_CELLULAR_AMIDE_METABOLIC_PROCESS	279	0.42982	2.02173	0	0.000996384	0.159
CHIARADONNA_NEOPLASTIC_TRANSFORMATION_CDC25_UP	73	0.513801	2.02145	0	0.000471187	0.133
LEE_CALORIE_RESTRICTION_NEOCORTEX_DN	63	0.527634	2.02095	0	0.000473174	0.134
GO_RIBONUCLEOPROTEIN_GRANULE	110	0.487113	2.01994	0	0.00100298	0.161
GO_ORGANELLAR_LARGE_RIBOSOMAL_SUBUNIT	31	0.6125	2.0182	0	0.00102111	0.163
AMIT_EGF_RESPONSE_40_HELA	39	0.579646	2.0164	0	0.000498307	0.141
GO_RESPONSE_TO_INORGANIC_SUBSTANCE	294	0.430725	2.0161	0	0.00103327	0.166
GO_RESPONSE_TO_TOPOLOGICALLY_INCORRECT_PROTEIN	139	0.463972	2.01601	0	0.00102797	0.166
SCIAN_INVERSED_TARGETS_OF_TP53_AND_TP73_DN	27	0.628468	2.01456	0	0.000506739	0.143
SMID_BREAST_CANCER_RELAPSE_IN_BONE_DN	156	0.459662	2.01451	0	0.000505351	0.143
AMIT_SERUM_RESPONSE_60_MCF10A	47	0.557948	2.0144	0	0.000507237	0.144
RODWELL_AGING_KIDNEY_NO_BLOOD_DN	105	0.481798	2.01391	0	0.000512223	0.145
GO_U5_SNRNP	16	0.703908	2.01331	0.00165017	0.00108596	0.176
GO_RESPONSE_TO_HYDROGEN_PEROXIDE	86	0.504402	2.01309	0	0.00108614	0.177
GO_SINGLE_STRANDED_RNA_BINDING	53	0.54092	2.01226	0	0.00108065	0.177
GO_INTRAMOLECULAR_OXIDOREDUCTASE_ACTIVITY_TRANSPOSING_S_S_BONDS	18	0.688401	2.01163	0	0.00108658	0.179
HAHTOLA_MYCOSIS_FUNGOIDES_CD4_DN	105	0.478428	2.01135	0	0.000533514	0.152
PAPASPYRIDONOS_UNSTABLE_ATEROSCLEROTIC_PLAQUE_UP	36	0.602236	2.01112	0	0.000532068	0.152
IIZUKA_LIVER_CANCER_PROGRESSION_L0_L1_DN	19	0.674591	2.00978	0	0.000549935	0.156
BILBAN_B_CLL_LPL_DN	31	0.604123	2.00927	0	0.000551724	0.157
PID_BETA_CATENIN_NUC_PATHWAY	51	0.547857	2.00926	0	0.000550241	0.157
SEKI_INFLAMMATORY_RESPONSE_LPS_UP	45	0.563083	2.00884	0	0.000548765	0.157
GO_RNA_3_END_PROCESSING	92	0.487381	2.00811	0	0.00113758	0.188
SASSON_RESPONSE_TO_GONADOTROPHINS_UP	77	0.504952	2.00782	0	0.00056335	0.162
HAN_JNK_SINGALING_UP	22	0.656793	2.00468	0	0.00057775	0.167
GO_OXIDOREDUCTASE_ACTIVITY_ACTING_ON_PEROXIDE_AS_ACCEPTOR	22	0.656044	2.00304	0	0.00122138	0.202
SMITH_TERT_TARGETS_UP	130	0.464823	2.00287	0	0.000592108	0.172
ACEVEDO_NORMAL_TISSUE_ADJACENT_TO_LIVER_TUMOR_UP	130	0.463977	2.0024	0	0.000593616	0.173
GO_DISULFIDE_OXIDOREDUCTASE_ACTIVITY	25	0.629535	2.00106	0	0.00127113	0.211
REACTOME_FORMATION_OF_RNA_POL_II_ELONGATION_COMPLEX_	37	0.576097	2.00038	0	0.000623445	0.182
APRELIKOVA_BRCA1_TARGETS	41	0.57429	1.99952	0	0.000634415	0.186
TONKS_TARGETS_OF_RUNX1_RUNX1T1_FUSION_MONOCYTE_UP	155	0.461471	1.99925	0	0.000635854	0.187
HOUSTIS_ROS	30	0.602088	1.99828	0	0.000643628	0.189
GO_REGULATION_OF_PROTEIN_CATABOLIC_PROCESS	324	0.419974	1.99783	0	0.00129828	0.216
GO_GLYCOSYL_COMPOUND_METABOLIC_PROCESS	278	0.425427	1.99762	0	0.00129749	0.217
KEGG_LYSOSOME	100	0.48257	1.99743	0	0.000645147	0.19
ZHOU_CELL_CYCLE_GENES_IN_IR_RESPONSE_24HR	112	0.477905	1.99643	0	0.000643463	0.19
GO_NEGATIVE_REGULATION_OF_PROTEIN_COMPLEX_ASSEMBLY	70	0.516833	1.99619	0	0.00131843	0.22
JAZAERI_BREAST_CANCER_BRCA1_VS_BRCA2_UP	45	0.559107	1.9961	0	0.00064494	0.19
GO_RIBONUCLEOPROTEIN_COMPLEX_LOCALIZATION	110	0.477338	1.99553	0	0.00133386	0.222
GO_REGULATION_OF_TELOMERE_MAINTENANCE_VIA_TELOMERE_LENGTHENING	45	0.559613	1.99461	0	0.00136008	0.227
ONDER_CDH1_TARGETS_1_DN	119	0.476203	1.99425	0	0.000658809	0.194
PID_FOXO_PATHWAY	45	0.551063	1.99306	0	0.00066948	0.197
GO_POSITIVE_REGULATION_OF_INNATE_IMMUNE_RESPONSE	162	0.453256	1.99075	0	0.00143955	0.233
GO_PEPTIDYL_PROLINE_MODIFICATION	41	0.5593	1.99044	0	0.00143267	0.233
GO_REGULATION_OF_RESPONSE_TO_REACTIVE_OXYGEN_SPECIES	23	0.642821	1.98978	0	0.00143661	0.233
APPIERTO_RESPONSE_TO_FENRETINIDE_DN	45	0.553544	1.98953	0	0.000716885	0.208
GO_OXIDOREDUCTION_COENZYME_METABOLIC_PROCESS	83	0.494089	1.98933	0	0.0014298	0.233
ZHAN_MULTIPLE_MYELOMA_SUBGROUPS	30	0.6129	1.98711	0	0.00075482	0.221
BOUDOUKHA_BOUND_BY_IGF2BP2	90	0.488939	1.98586	0	0.000765068	0.225
BURTON_ADIPOGENESIS_8	71	0.510836	1.98566	0	0.000763107	0.225
LANDIS_ERBB2_BREAST_TUMORS_324_UP	119	0.468614	1.98227	0	0.000806731	0.237
GO_SNRNA_BINDING	34	0.588538	1.98051	0	0.00172582	0.279
JIANG_AGING_HYPOTHALAMUS_DN	29	0.618512	1.98034	0	0.00082591	0.242
REACTOME_ASPARAGINE_N_LINKED_GLYCOSYLATION	70	0.511723	1.97994	0	0.000829779	0.243
GO_ISOMERASE_ACTIVITY	119	0.464533	1.97951	0	0.00174419	0.283
GO_NEGATIVE_REGULATION_OF_INTRINSIC_APOPTOTIC_SIGNALING_PATHWAY	65	0.517134	1.97927	0	0.00174127	0.284
ENK_UV_RESPONSE_KERATINOCYTE_DN	449	0.405989	1.97719	0	0.000860828	0.249
REACTOME_ANTIVIRAL_MECHANISM_BY_IFN_STIMULATED_GENES	60	0.522433	1.97602	0	0.000873582	0.254
REACTOME_DIABETES_PATHWAYS	101	0.482511	1.97564	0	0.000880377	0.256
GO_REGULATION_OF_ACTIN_FILAMENT_DEPOLYMERIZATION	28	0.616274	1.97544	0	0.00184294	0.301
AKL_HTLV1_INFECTION_UP	23	0.650133	1.97486	0	0.000887089	0.257
DEN_INTERACT_WITH_LCA5	25	0.629007	1.97454	0	0.000896912	0.258
VANTVEER_BREAST_CANCER_ESR1_DN	173	0.44936	1.97426	0	0.000900606	0.26
WANG_BARRETTS_ESOPHAGUS_DN	17	0.6952	1.97376	0	0.000904276	0.261
GO_REGULATION_OF_STEROID_BIOSYNTHETIC_PROCESS	29	0.608304	1.97367	0	0.00192298	0.309
KAYO_AGING_MUSCLE_DN	101	0.475688	1.97221	0	0.000919854	0.267
RODWELL_AGING_KIDNEY_NO_BLOOD_UP	126	0.460535	1.9721	0	0.00092048	0.268
GO_SMALL_MOLECULE_BIOSYNTHETIC_PROCESS	287	0.420973	1.97141	0	0.00201293	0.324
KYNG_RESPONSE_TO_H2O2	58	0.520541	1.9687	0.00141443	0.000953719	0.277
GO_DICARBOXYLIC_ACID_METABOLIC_PROCESS	68	0.506857	1.96829	0	0.00206544	0.333
WATANABE_RECTAL_CANCER_RADIOTHERAPY_RESPONSIVE_DN	75	0.497958	1.96801	0	0.000957265	0.279
KEGG_CARDIAC_MUSCLE_CONTRACTION	39	0.57551	1.96731	0	0.000966617	0.283
OSMAN_BLADDER_CANCER_DN	316	0.416069	1.96679	0	0.000973037	0.284
SARRIO_EPITHELIAL_MESENCHYMAL_TRANSITION_DN	101	0.474259	1.96675	0	0.000970646	0.284
GO_REGULATION_OF_PROTEOLYSIS	457	0.407549	1.96671	0	0.0020975	0.339
HOSHIDA_LIVER_CANCER_SUBCLASS_S1	161	0.447352	1.96653	0	0.000968267	0.284
BURTON_ADIPOGENESIS_PEAK_AT_24HR	35	0.577388	1.9661	0.00153846	0.000983247	0.289
BARIS_THYROID_CANCER_UP	20	0.659925	1.9655	0	0.000983808	0.289
CHUNG_BLISTER_CYTOTOXICITY_UP	100	0.471708	1.96464	0	0.000990127	0.291
GO_ASPARTATE_FAMILY_AMINO_ACID_BIOSYNTHETIC_PROCESS	19	0.669024	1.96461	0.00177936	0.00214926	0.346
GO_RESPONSE_TO_TUMOR_NECROSIS_FACTOR	138	0.453982	1.9643	0	0.0021496	0.347
MODY_HIPPOCAMPUS_POSTNATAL	43	0.551844	1.96353	0	0.00100207	0.295
CAIRO_PML_TARGETS_BOUND_BY_MYC_UP	21	0.662072	1.96233	0	0.00102268	0.301
MISHRA_CARCINOMA_ASSOCIATED_FIBROBLAST_DN	17	0.68682	1.96214	0.00164474	0.00102312	0.302
GO_ATPASE_ACTIVITY_COUPLED_TO_TRANSMEMBRANE_MOVEMENT_OF_IONS_PHOSPHORYLATIVE_MECHANISM	19	0.673792	1.96178	0	0.00222616	0.361
DAIRKEE_CANCER_PRONE_RESPONSE_BPA	41	0.561466	1.96094	0	0.00103499	0.306
GO_PRERIBOSOME_LARGE_SUBUNIT_PRECURSOR	20	0.660258	1.96023	0	0.00226166	0.365
WHITEFORD_PEDIATRIC_CANCER_MARKERS	105	0.468882	1.95988	0	0.00104679	0.309
GO_OSTEOBLAST_DIFFERENTIATION	74	0.507927	1.95948	0	0.00228184	0.369
REACTOME_ANTIGEN_PRESENTATION_FOLDING_ASSEMBLY_AND_PEPTIDE_LOADING_OF_CLASS_I_MHC	15	0.730918	1.959	0	0.00106137	0.311
BLUM_RESPONSE_TO_SALIRASIB_UP	218	0.431618	1.95775	0	0.00108167	0.315
KEGG_GLUTATHIONE_METABOLISM	33	0.582783	1.95724	0	0.0010876	0.316
JISON_SICKLE_CELL_DISEASE_UP	129	0.46108	1.95678	0	0.00109067	0.317
SENESE_HDAC2_TARGETS_UP	85	0.486234	1.95635	0	0.00109658	0.318
STEIN_ESRRA_TARGETS_UP	327	0.414114	1.95549	0	0.0011053	0.321
HEDENFALK_BREAST_CANCER_BRACX_UP	18	0.676142	1.95413	0	0.00112231	0.324
HELLEBREKERS_SILENCED_DURING_TUMOR_ANGIOGENESIS	43	0.555753	1.95409	0	0.00111966	0.324
GO_POSITIVE_REGULATION_OF_CELLULAR_AMIDE_METABOLIC_PROCESS	83	0.487824	1.95398	0	0.00244218	0.388
TSUNODA_CISPLATIN_RESISTANCE_DN	45	0.551087	1.95394	0	0.00112542	0.326
AMIT_SERUM_RESPONSE_40_MCF10A	25	0.614761	1.95328	0	0.00113403	0.327
KEGG_ARGININE_AND_PROLINE_METABOLISM	35	0.572613	1.95228	0.00307692	0.00114525	0.329
GO_CELLULAR_MODIFIED_AMINO_ACID_METABOLIC_PROCESS	136	0.455003	1.95187	0	0.00251568	0.399
GO_POSITIVE_REGULATION_OF_DNA_REPLICATION	63	0.512638	1.95167	0	0.00250944	0.399
NADLER_OBESITY_UP	40	0.556257	1.95074	0	0.00117608	0.335
LI_WILMS_TUMOR_VS_FETAL_KIDNEY_1_DN	143	0.446257	1.9499	0	0.00119574	0.341
LIANG_SILENCED_BY_METHYLATION_2	29	0.59431	1.94969	0	0.00120407	0.343
BOYAULT_LIVER_CANCER_SUBCLASS_G123_UP	40	0.556972	1.94884	0	0.00122593	0.349
BYSTROEM_CORRELATED_WITH_IL5_UP	36	0.568769	1.94836	0	0.00123412	0.351
XU_HGF_TARGETS_INDUCED_BY_AKT1_6HR	16	0.698076	1.94674	0	0.00126151	0.357
BIOCARTA_IGF1MTOR_PATHWAY	18	0.66656	1.94601	0	0.00128319	0.362
GO_ROUGH_ENDOPLASMIC_RETICULUM	41	0.553528	1.94574	0	0.00269588	0.424
NOJIMA_SFRP2_TARGETS_UP	23	0.635535	1.94453	0	0.00129662	0.364
GO_CELL_RECOGNITION	38	0.563464	1.94409	0	0.00275787	0.434
GO_PROTON_TRANSPORTING_ATP_SYNTHASE_COMPLEX	21	0.63884	1.94327	0	0.00277508	0.435
GO_CARBOHYDRATE_BINDING	101	0.473584	1.94264	0	0.00279705	0.437
PUIFFE_INVASION_INHIBITED_BY_ASCITES_DN	128	0.453799	1.9425	0	0.00133739	0.374
GO_REGULATION_OF_HUMORAL_IMMUNE_RESPONSE	20	0.65339	1.94243	0	0.00279467	0.438
HSIAO_LIVER_SPECIFIC_GENES	86	0.479888	1.94236	0	0.00133983	0.376
CEBALLOS_TARGETS_OF_TP53_AND_MYC_UP	18	0.66273	1.94199	0	0.00135039	0.38
SESTO_RESPONSE_TO_UV_C6	34	0.576342	1.94126	0.00159744	0.00136087	0.382
TIEN_INTESTINE_PROBIOTICS_6HR_DN	149	0.446998	1.93893	0	0.00140395	0.394
WINTER_HYPOXIA_UP	76	0.486351	1.93827	0	0.00140349	0.394
LENAOUR_DENDRITIC_CELL_MATURATION_DN	75	0.491167	1.93819	0	0.00140572	0.394
GO_REGULATION_OF_MITOCHONDRIAL_MEMBRANE_POTENTIAL	40	0.56762	1.93792	0	0.00298986	0.466
LEE_AGING_NEOCORTEX_UP	66	0.499625	1.93761	0	0.00141059	0.397
GERHOLD_ADIPOGENESIS_DN	44	0.542126	1.93703	0	0.00142079	0.402
WHITFIELD_CELL_CYCLE_M_G1	127	0.455875	1.93656	0	0.00143371	0.405
RAMALHO_STEMNESS_UP	190	0.427738	1.93648	0	0.00143319	0.406
LINDGREN_BLADDER_CANCER_CLUSTER_3_UP	282	0.413975	1.93633	0	0.00143263	0.407
GO_SINGLE_FERTILIZATION	44	0.541036	1.93612	0	0.00302487	0.472
SMID_BREAST_CANCER_LUMINAL_B_DN	217	0.425735	1.93602	0	0.00144001	0.41
GO_ENERGY_RESERVE_METABOLIC_PROCESS	47	0.537512	1.93564	0	0.00303591	0.476
BERENJENO_TRANSFORMED_BY_RHOA_REVERSIBLY_DN	19	0.647929	1.93523	0	0.00145272	0.413
GO_REACTIVE_OXYGEN_SPECIES_METABOLIC_PROCESS	58	0.515111	1.93506	0	0.00304205	0.477
GO_NEGATIVE_REGULATION_OF_WNT_SIGNALING_PATHWAY	128	0.454476	1.93469	0	0.00304834	0.48
DEMAGALHAES_AGING_UP	32	0.582624	1.93448	0	0.00146264	0.415
GO_NUCLEOBASE_CONTAINING_SMALL_MOLECULE_METABOLIC_PROCESS	391	0.403244	1.93447	0	0.00304025	0.48
GRAHAM_NORMAL_QUIESCENT_VS_NORMAL_DIVIDING_DN	79	0.489319	1.93443	0	0.00146202	0.416
ZAMORA_NOS2_TARGETS_DN	69	0.494914	1.9343	0	0.00146414	0.418
GO_ACTIN_FILAMENT_BUNDLE_ORGANIZATION	32	0.577625	1.93384	0	0.00306514	0.483
SASAKI_ADULT_T_CELL_LEUKEMIA	143	0.440186	1.93292	0	0.00150046	0.43
TSENG_IRS1_TARGETS_UP	76	0.488422	1.9328	0	0.00149716	0.43
HU_GENOTOXIN_ACTION_DIRECT_VS_INDIRECT_24HR	43	0.540278	1.932	0	0.00149904	0.43
GO_FC_RECEPTOR_SIGNALING_PATHWAY	145	0.445346	1.93161	0	0.00320709	0.504
KORKOLA_YOLK_SAC_TUMOR_UP	18	0.663901	1.93116	0	0.00151676	0.435
REACTOME_MEMBRANE_TRAFFICKING	100	0.464717	1.93047	0	0.00153433	0.438
GO_AMINO_ACID_ACTIVATION	50	0.533064	1.93029	0	0.00327323	0.515
GO_CALCIUM_DEPENDENT_PHOSPHOLIPID_BINDING	26	0.607307	1.92809	0	0.00339449	0.525
GALINDO_IMMUNE_RESPONSE_TO_ENTEROTOXIN	65	0.501311	1.92806	0	0.00157237	0.447
PRAMOONJAGO_SOX4_TARGETS_UP	46	0.532619	1.92778	0	0.00158715	0.45
GROSS_HYPOXIA_VIA_HIF1A_UP	69	0.495941	1.92722	0	0.00158629	0.45
HAHTOLA_MYCOSIS_FUNGOIDES_CD4_UP	44	0.541026	1.92599	0	0.00159319	0.451
GO_MULTI_ORGANISM_LOCALIZATION	62	0.500281	1.92552	0	0.00351453	0.54
PUIFFE_INVASION_INHIBITED_BY_ASCITES_UP	72	0.48748	1.92392	0	0.00164133	0.461
SESTO_RESPONSE_TO_UV_C3	16	0.681543	1.92326	0	0.00165841	0.465
GO_NUCLEAR_IMPORT	109	0.461175	1.92296	0	0.00366136	0.56
MOOTHA_GLUCONEOGENESIS	21	0.635816	1.92288	0	0.00166259	0.467
HEDENFALK_BREAST_CANCER_HEREDITARY_VS_SPORADIC	44	0.542746	1.9227	0	0.00166161	0.468
RIZKI_TUMOR_INVASIVENESS_3D_DN	176	0.429862	1.92256	0	0.00166057	0.468
KEGG_PATHOGENIC_ESCHERICHIA_COLI_INFECTION	36	0.562306	1.92251	0	0.00165702	0.468
GROSS_HIF1A_TARGETS_DN	19	0.658933	1.92204	0	0.00165861	0.469
LEE_LIVER_CANCER_MYC_TGFA_UP	39	0.560612	1.92074	0.00157233	0.00168544	0.476
VERHAAK_AML_WITH_NPM1_MUTATED_UP	84	0.482443	1.92009	0	0.00169453	0.479
BIOCARTA_MPR_PATHWAY	26	0.610306	1.9195	0	0.00170108	0.483
WANG_ADIPOGENIC_GENES_REPRESSED_BY_SIRT1	21	0.64488	1.91919	0	0.00170505	0.484
GRUETZMANN_PANCREATIC_CANCER_DN	124	0.45123	1.91902	0	0.00170397	0.485
GO_RESPONSE_TO_METAL_ION	194	0.427933	1.9186	0	0.00388072	0.582
IIZUKA_LIVER_CANCER_PROGRESSION_G1_G2_DN	23	0.631496	1.91812	0.00160772	0.00171778	0.487
MAYBURD_RESPONSE_TO_L663536_DN	48	0.533609	1.91808	0	0.00171416	0.487
BURTON_ADIPOGENESIS_7	33	0.57384	1.91779	0.00153374	0.00171552	0.487
SASSON_RESPONSE_TO_FORSKOLIN_UP	76	0.482459	1.91742	0	0.00172187	0.491
JECHLINGER_EPITHELIAL_TO_MESENCHYMAL_TRANSITION_UP	37	0.562348	1.91695	0	0.00173316	0.494
CROMER_TUMORIGENESIS_UP	28	0.606021	1.91569	0.00314961	0.00176698	0.503
BILANGES_RAPAMYCIN_SENSITIVE_GENES	34	0.560765	1.91567	0	0.0017633	0.503
TOMIDA_METASTASIS_DN	16	0.674288	1.91551	0	0.00176457	0.504
GO_ER_ASSOCIATED_UBIQUITIN_DEPENDENT_PROTEIN_CATABOLIC_PROCESS	58	0.50436	1.91538	0	0.00400675	0.592
MCBRYAN_PUBERTAL_TGFB1_TARGETS_UP	126	0.448591	1.91397	0	0.0017956	0.512
GO_POSITIVE_REGULATION_OF_WNT_SIGNALING_PATHWAY	112	0.460347	1.91381	0	0.00409079	0.601
GO_CYCLIN_DEPENDENT_PROTEIN_SERINE_THREONINE_KINASE_REGULATOR_ACTIVITY	23	0.614634	1.9138	0.00163666	0.00407429	0.601
WU_CELL_MIGRATION	117	0.462327	1.91376	0	0.00179435	0.513
REACTOME_DEADENYLATION_DEPENDENT_MRNA_DECAY	42	0.541634	1.91348	0	0.00180042	0.514
THUM_SYSTOLIC_HEART_FAILURE_UP	263	0.411529	1.9134	0	0.00179914	0.515
GO_RIBOSOME_BINDING	43	0.544474	1.91324	0	0.00406704	0.602
SMID_BREAST_CANCER_BASAL_UP	354	0.400006	1.91307	0	0.0017979	0.516
GESERICK_TERT_TARGETS_DN	17	0.665038	1.91245	0	0.00180157	0.517
CHAUHAN_RESPONSE_TO_METHOXYESTRADIOL_UP	44	0.527012	1.91189	0	0.00181736	0.521
HOFMANN_MYELODYSPLASTIC_SYNDROM_LOW_RISK_DN	25	0.60677	1.91144	0.00162075	0.00182355	0.524
GO_CELLULAR_RESPONSE_TO_REACTIVE_OXYGEN_SPECIES	79	0.481751	1.91113	0	0.00413611	0.61
GO_SULFUR_AMINO_ACID_BIOSYNTHETIC_PROCESS	16	0.674389	1.9107	0.00518135	0.00415994	0.613
DANG_REGULATED_BY_MYC_UP	65	0.49645	1.91052	0	0.00184414	0.527
REACTOME_UNFOLDED_PROTEIN_RESPONSE	73	0.49061	1.90815	0	0.0019107	0.541
SHAFFER_IRF4_MULTIPLE_MYELOMA_PROGRAM	31	0.574606	1.90793	0.00158983	0.00191651	0.543
NELSON_RESPONSE_TO_ANDROGEN_UP	62	0.505695	1.90779	0	0.0019151	0.543
WONG_PROTEASOME_GENE_MODULE	49	0.519873	1.90776	0	0.00191122	0.543
GO_ATPASE_COUPLED_ION_TRANSMEMBRANE_TRANSPORTER_ACTIVITY	46	0.527651	1.90758	0.00144509	0.00433585	0.629
GO_NAD_METABOLIC_PROCESS	40	0.544785	1.90726	0	0.00432758	0.629
GO_PLATELET_ALPHA_GRANULE	34	0.564909	1.90682	0	0.00434155	0.631
UEDA_CENTRAL_CLOCK	67	0.493416	1.90679	0	0.00193388	0.549
CHARAFE_BREAST_CANCER_LUMINAL_VS_BASAL_DN	336	0.400658	1.90679	0	0.00192999	0.549
SHEPARD_BMYB_MORPHOLINO_UP	157	0.433518	1.9065	0	0.00193334	0.55
BURTON_ADIPOGENESIS_9	66	0.496909	1.90636	0	0.00193422	0.551
GO_REGULATION_OF_PROTEIN_MODIFICATION_BY_SMALL_PROTEIN_CONJUGATION_OR_REMOVAL	245	0.413809	1.90625	0	0.0043776	0.635
KEGG_CELL_CYCLE	113	0.456006	1.90622	0	0.00193512	0.552
GO_REGULATION_OF_ALTERNATIVE_MRNA_SPLICING_VIA_SPLICEOSOME	27	0.591536	1.90614	0	0.00436492	0.635
REACTOME_CELL_CYCLE_MITOTIC	292	0.411582	1.9058	0	0.00194777	0.555
GO_ENDOPLASMIC_RETICULUM_GOLGI_INTERMEDIATE_COMPARTMENT	81	0.475691	1.90563	0	0.00436981	0.636
GO_ORGANELLE_ENVELOPE_LUMEN	64	0.49583	1.90416	0	0.00442259	0.644
GO_NEGATIVE_REGULATION_OF_PROTEIN_BINDING	60	0.504114	1.90267	0	0.00449227	0.652
ENK_UV_RESPONSE_EPIDERMIS_UP	216	0.416206	1.90115	0	0.00208147	0.579
BURTON_ADIPOGENESIS_PEAK_AT_8HR	32	0.572767	1.90016	0	0.00211071	0.584
DACOSTA_UV_RESPONSE_VIA_ERCC3_TTD_DN	71	-0.433982	-1.91156	0	0.045993	0.602
REACTOME_PACKAGING_OF_TELOMERE_ENDS	38	-0.50202	-1.91365	0	0.0492075	0.595
GO_CELL_DIFFERENTIATION_IN_SPINAL_CORD	20	-0.611126	-1.95987	0.00239808	0.0319457	0.531
GO_ACTIVATION_OF_JUN_KINASE_ACTIVITY	25	-0.576604	-1.96124	0	0.0335289	0.526
GO_REGULATION_OF_RHO_PROTEIN_SIGNAL_TRANSDUCTION	75	-0.431382	-1.9616	0	0.0354253	0.522
PEREZ_TP53_AND_TP63_TARGETS	120	-0.403979	-1.96384	0	0.0359464	0.408
GO_DNA_DIRECTED_DNA_POLYMERASE_ACTIVITY	24	-0.572885	-1.96659	0	0.0358327	0.504
ACEVEDO_LIVER_CANCER_WITH_H3K9ME3_DN	80	-0.439697	-1.97853	0.00350877	0.033889	0.361
DAZARD_RESPONSE_TO_UV_NHEK_DN	282	-0.369868	-1.97877	0	0.0387303	0.361
SENGUPTA_EBNA1_ANTICORRELATED	93	-0.432763	-1.9864	0	0.0414723	0.333
GO_LYSINE_N_METHYLTRANSFERASE_ACTIVITY	41	-0.513871	-1.98899	0	0.0308322	0.433
GO_RAB_GUANYL_NUCLEOTIDE_EXCHANGE_FACTOR_ACTIVITY	23	-0.597261	-1.9942	0.00251256	0.0311565	0.412
GO_NUCLEAR_NUCLEOSOME	28	-0.575114	-2.01547	0	0.0263677	0.337
ZHOU_INFLAMMATORY_RESPONSE_FIMA_DN	177	-0.389574	-2.02003	0	0.0332704	0.249
ZHAN_MULTIPLE_MYELOMA_PR_DN	29	-0.571848	-2.03722	0	0.0331495	0.206
GO_MICROTUBULE_ORGANIZING_CENTER_PART	123	-0.414539	-2.04474	0	0.0195973	0.241
GO_REGULATION_OF_RAS_PROTEIN_SIGNAL_TRANSDUCTION	127	-0.418864	-2.05458	0	0.0200691	0.226
GO_REGULATION_OF_SMALL_GTPASE_MEDIATED_SIGNAL_TRANSDUCTION	199	-0.4043	-2.08111	0	0.0164912	0.169
GO_DNA_PACKAGING_COMPLEX	74	-0.470372	-2.08467	0	0.0184267	0.167
GO_MICROTUBULE_MOTOR_ACTIVITY	56	-0.495376	-2.09033	0	0.019542	0.152
GO_CENTROSOME_DUPLICATION	30	-0.580452	-2.09363	0	0.0221396	0.143
ZWANG_DOWN_BY_2ND_EGF_PULSE	167	-0.414084	-2.10076	0	0.0213396	0.105
REACTOME_MEIOTIC_RECOMBINATION	64	-0.497759	-2.1227	0	0.0229079	0.075
GO_HISTONE_LYSINE_N_METHYLTRANSFERASE_ACTIVITY	33	-0.563508	-2.12523	0	0.0167402	0.088
GO_STRAND_DISPLACEMENT	26	-0.616445	-2.16628	0	0.014064	0.057
REACTOME_RNA_POL_I_PROMOTER_OPENING	47	-0.544309	-2.19905	0	0.0151788	0.025
GO_CENTRIOLE	86	-0.487843	-2.2388	0	0.00765917	0.021
GO_RHO_GUANYL_NUCLEOTIDE_EXCHANGE_FACTOR_ACTIVITY	55	-0.581301	-2.41969	0	0	0
