# Supplementary material
Source: HighWire-hosted journal article supplement (doi:10.1101/rna.065383.117)
Supplement: Supplemental_Table_S3_Rh18_Sudemycin_differentially_splicing_events.xlsx [file Supplemental_Table_S3_Rh18_Sudemycin_differentially_splicing_events.xlsx]

## Sheet: A3SS
GeneID	geneSymbol	chr	strand	longExonStart_0base	longExonEnd	shortES	shortEE	flankingES	flankingEE	IJC_SAMPLE_1	SJC_SAMPLE_1	IJC_SAMPLE_2	SJC_SAMPLE_2	IncFormLen	SkipFormLen	PValue	FDR	IncLevel1	IncLevel2	IncLevelDifference
ENSG00000089006	SNX5	20	-	17934639	17934875	17934639	17934761	17936008	17936119	149137128	2,7,9	18,19,23	19,15,21	172	86	0	0	0.974,0.907,0.877	0.321,0.388,0.354	0.565
ENSG00000089006	SNX5	20	-	17934639	17934867	17934639	17934761	17936008	17936119	149141134	2,7,9	34,27,38	19,15,21	172	86	0	0	0.974,0.91,0.882	0.472,0.474,0.475	0.448
ENSG00000108819	PPP1R9B	17	-	48217457	48217724	48217457	48217593	48218633	48218738	252249197	54,49,58	46,54,39	260271259	172	86	0	0	0.7,0.718,0.629	0.081,0.091,0.07	0.602
ENSG00000108001	EBF3	10	-	131638508	131638706	131638508	131638598	131639107	131639296	59,78,71	12,23,10	50,36,36	98122120	169	83	0	0	0.707,0.625,0.777	0.2,0.127,0.128	0.551
ENSG00000075426	FOSL2	2	+	28634745	28640179	28634796	28640179	28631625	28631733	69,80,57	30,18,16	2,2,1	18,12,23	130	86	0	0	0.603,0.746,0.702	0.068,0.099,0.028	0.619
ENSG00000140416	TPM1	15	+	63353396	63354476	63354413	63354476	63353067	63353138	23,23,19	83,50,63	56,41,41	1,0,1	120	34	0	0	0.073,0.115,0.079	0.941,1.0,0.921	-0.865
ENSG00000124207	CSE1L	20	+	47712712	47713489	47712885	47713489	47711268	47711500	330353315	6,4,2	16,22,20	19,9,10	172	86	0	0	0.965,0.978,0.987	0.296,0.55,0.5	0.528
ENSG00000172534	HCFC1	X	-	153217964	153218541	153217964	153218409	153219057	153219221	100103104	20,32,28	49,59,36	98,79,92	172	86	0	0	0.714,0.617,0.65	0.2,0.272,0.164	0.448
ENSG00000178719	GRINA	8	+	145066045	145066541	145066412	145066541	145065859	145065972	16,4,12	69,79,66	20,30,14	2,3,2	172	86	0	0	0.104,0.025,0.083	0.833,0.833,0.778	-0.744
ENSG00000099901	RANBP1	22	+	20113825	20114704	20114474	20114704	20112830	20112959	11,16,19	28,31,31	31,28,18	1,1,1	172	86	0	0	0.164,0.205,0.235	0.939,0.933,0.9	-0.723
ENSG00000125835	SNRPB	20	-	2442279	2442585	2442279	2442439	2443281	2443407	104,88,78	588614537	32,30,28	903967959	172	86	0	0	0.081,0.067,0.068	0.017,0.015,0.014	0.057
ENSG00000149428	HYOU1	11	-	118919729	118920082	118919729	118919915	118920267	118920347	155173170	9,7,10	10,3,4	14,13,13	159	73	0	0	0.888,0.919,0.886	0.247,0.096,0.124	0.742
ENSG00000100796	SMEK1	14	-	91928392	91928583	91928392	91928565	91929078	91929221	19,22,16	500590473	10,9,13	5,13,10	97	86	0	0	0.033,0.032,0.029	0.639,0.38,0.535	-0.487
ENSG00000064393	HIPK2	7	-	139299031	139299239	139299031	139299158	139305146	139305309	20,34,29	213172184	83,62,48	30,8,16	160	86	0	0	0.048,0.096,0.078	0.598,0.806,0.617	-0.6
ENSG00000008952	SEC62	3	+	169700424	169700699	169700494	169700699	169694733	169694839	55,41,55	3,2,2	1,1,2	10,7,8	149	86	0	0	0.914,0.922,0.941	0.055,0.076,0.126	0.84
ENSG00000091127	PUS7	7	-	105148561	105148991	105148561	105148967	105162498	105162705	16,15,23	74,59,67	97,101,84	23,27,15	103	86	0	0	0.153,0.175,0.223	0.779,0.757,0.824	-0.603
ENSG00000139620	KANSL2	12	-	49072818	49073021	49072818	49072933	49073437	49073616	558611568	16,18,20	20,30,25	63,72,66	167	86	0	0	0.947,0.946,0.936	0.141,0.177,0.163	0.783
ENSG00000102317	RBM3	X	+	48433948	48434807	48434701	48434807	48433555	48433671	79,73,50	263253276	59,77,67	26,35,36	172	86	0	0	0.131,0.126,0.083	0.532,0.524,0.482	-0.399
ENSG00000026025	VIM	10	+	17277844	17278378	17278292	17278378	17277167	17277388	70,56,45	111113141	78,85,64	4,5,2	165	79	0	0	0.232,0.192,0.133	0.903,0.891,0.939	-0.725
ENSG00000100353	EIF3D	22	-	36913347	36913540	36913347	36913478	36914809	36914957	79,83,66	14,17,13	10,14,14	25,27,23	141	86	0	0	0.775,0.749,0.756	0.196,0.24,0.271	0.524
ENSG00000092148	HECTD1	14	-	31597817	31598654	31597817	31598513	31602443	31602620	154184178	19,9,11	229188185	88,68,78	172	86	2.22045e-16	3.86675e-14	0.802,0.911,0.89	0.565,0.58,0.543	0.305
ENSG00000073584	SMARCE1	17	-	38787843	38788619	38787843	38787945	38792182	38792354	6,10,5	43,44,28	11,15,8	1,0,1	172	86	9.99201e-16	1.66094e-13	0.065,0.102,0.082	0.846,1.0,0.8	-0.799
ENSG00000110321	EIF4G2	11	-	10825026	10825597	10825026	10825137	10825683	10825750	126168100	157150119	46,39,31	2,0,4	146	60	1.11022e-15	1.76525e-13	0.248,0.315,0.257	0.904,1.0,0.761	-0.615
ENSG00000239672	NME1	17	+	49238458	49238633	49238520	49238633	49237340	49237442	62,64,62	41,40,37	11,6,11	35,43,41	141	86	5.55112e-15	8.45851e-13	0.48,0.494,0.505	0.161,0.078,0.141	0.366
ENSG00000064651	SLC12A2	5	+	127520414	127520548	127520480	127520548	127520057	127520193	44,40,65	2,2,4	1,3,1	13,5,5	120	61	1.29896e-14	1.90012e-12	0.918,0.91,0.892	0.038,0.234,0.092	0.785
ENSG00000112531	QKI	6	+	163986977	163987827	163987752	163987827	163984451	163984751	289302270	5,0,1	18,18,22	3,6,8	154	68	1.58762e-14	2.23305e-12	0.962,1.0,0.992	0.726,0.57,0.548	0.37
ENSG00000168256	NKIRAS2	17	+	40174393	40174658	40174416	40174658	40173581	40173689	74,103,95	1,1,0	4,1,0	4,5,7	102	86	5.04041e-14	6.82696e-12	0.984,0.989,1.0	0.457,0.144,0.0	0.791
ENSG00000233927	RPS28	19	+	8386539	8386975	8386836	8386975	8386383	8386453	27,19,28	140105124	21,12,16	16,9,9	149	63	5.22915e-14	6.82964e-12	0.075,0.071,0.087	0.357,0.361,0.429	-0.305
ENSG00000135486	HNRNPA1	12	+	54675169	54675725	54675578	54675725	54674532	54674606	3,15,7	533587498	1,4,6	2,6,2	153	67	2.59348e-13	3.27047e-11	0.002,0.011,0.006	0.18,0.226,0.568	-0.318
ENSG00000151923	TIAL1	10	-	121341970	121342120	121341970	121342069	121347663	121347760	41,52,42	1,10,1	8,4,6	13,12,10	130	86	2.41041e-12	2.93828e-10	0.964,0.775,0.965	0.289,0.181,0.284	0.65
ENSG00000166441	RPL27A	11	+	8705409	8705628	8705552	8705628	8704748	8704812	41,31,27	299273204	1,1,1	157169181	126	40	3.91098e-12	4.6137e-10	0.042,0.035,0.04	0.002,0.002,0.002	0.037
ENSG00000154380	ENAH	1	-	225704897	225705692	225704897	225705008	225706899	225707267	139132122	4,7,1	48,35,40	15,13,10	172	86	5.9831e-12	6.83756e-10	0.946,0.904,0.984	0.615,0.574,0.667	0.326
ENSG00000116698	SMG7	1	+	183486760	183486955	183486822	183486955	183485008	183485126	105129133	8,12,8	15,10,9	11,7,9	141	86	8.48566e-12	9.40365e-10	0.889,0.868,0.91	0.454,0.466,0.379	0.456
ENSG00000119718	EIF2B2	14	+	75472543	75472664	75472568	75472664	75471439	75471603	9,5,7	64,71,66	3,0,3	281337297	104	86	7.9194e-11	8.51801e-09	0.104,0.055,0.081	0.009,0.0,0.008	0.074
ENSG00000163938	GNL3	3	+	52724607	52725087	52724960	52725087	52723089	52723222	0,0,2	33,39,45	6,6,6	0,0,3	172	86	1.08083e-10	1.12931e-08	0.0,0.0,0.022	1.0,1.0,0.5	-0.826
ENSG00000112531	QKI	6	+	163985698	163991177	163986977	163991177	163984451	163984751	0,2,4	289302270	2,2,7	18,18,22	172	86	5.88696e-10	5.84455e-08	0.0,0.003,0.007	0.053,0.053,0.137	-0.078
ENSG00000163430	FSTL1	3	-	120169530	120169644	120169530	120169593	120169743	120169838	59,71,70	47,46,42	15,11,22	44,46,41	100	56	5.91327e-10	5.84455e-08	0.413,0.464,0.483	0.16,0.118,0.231	0.284
ENSG00000168614	NBPF9	1	+	144823051	144823179	144823127	144823179	144821920	144822084	41,23,28	1,0,3	4,1,2	8,3,7	114	45	6.44839e-10	6.20573e-08	0.942,1.0,0.787	0.165,0.116,0.101	0.782
ENSG00000166813	KIF7	15	-	90192971	90193275	90192971	90193172	90195833	90196185	11,14,18	0,0,3	7,12,10	16,25,25	172	86	1.10037e-09	1.03181e-07	1.0,1.0,0.75	0.179,0.194,0.167	0.737
ENSG00000148925	BTBD10	11	-	13443188	13443385	13443188	13443362	13484638	13484844	15,17,13	120136105	4,7,6	2,2,0	102	86	1.91163e-09	1.74771e-07	0.095,0.095,0.095	0.628,0.747,1.0	-0.697
ENSG00000175197	DDIT3	12	-	57911051	57911325	57911051	57911207	57911488	57911536	33,34,33	23,36,34	4,5,3	32,29,20	127	41	3.24555e-09	2.89487e-07	0.317,0.234,0.239	0.039,0.053,0.046	0.217
ENSG00000108001	EBF3	10	-	131638508	131638706	131638508	131638598	131640379	131640557	87,87,88	59,61,56	35,22,31	67,56,50	169	83	4.38859e-09	3.82121e-07	0.42,0.412,0.436	0.204,0.162,0.233	0.223
ENSG00000124784	RIOK1	6	+	7395253	7395376	7395285	7395376	7393331	7393536	5,22,11	14,20,21	8,7,8	89,89,104	109	84	8.38704e-09	7.13288e-07	0.216,0.459,0.288	0.065,0.057,0.056	0.262
ENSG00000173039	RELA	11	-	65429649	65429818	65429649	65429676	65430296	65430389	7,5,3	60,68,62	4,6,3	4,1,2	106	20	1.38834e-08	1.1539e-06	0.022,0.014,0.009	0.159,0.531,0.221	-0.289
ENSG00000063241	ISOC2	19	-	55966626	55966745	55966626	55966697	55967715	55967856	64,58,79	98,100,85	43,48,59	194173163	105	64	1.79331e-08	1.45736e-06	0.285,0.261,0.362	0.119,0.145,0.181	0.154
ENSG00000111581	NUP107	12	+	69090598	69090702	69090630	69090702	69085747	69085892	46,49,34	2,3,7	40,45,44	41,31,22	90	65	3.05579e-08	2.42935e-06	0.943,0.922,0.778	0.413,0.512,0.591	0.376
ENSG00000170471	RALGAPB	20	+	37163716	37163850	37163728	37163850	37161372	37161502	8,2,3	7,2,3	0,0,3	28,35,34	91	86	3.40877e-08	2.65231e-06	0.519,0.486,0.486	0.0,0.0,0.077	0.471
ENSG00000185686	PRAME	22	-	22899231	22899506	22899231	22899329	22899964	22900000	20,25,24	4,6,5	9,8,8	16,11,17	115	29	3.53071e-08	2.68996e-06	0.558,0.512,0.548	0.124,0.155,0.106	0.411
ENSG00000143947	RPS27A	2	+	55461254	55462098	55461966	55462098	55460498	55460553	25,25,16	11,19,18	29,29,21	1,1,1	134	48	3.63622e-08	2.71381e-06	0.449,0.32,0.242	0.912,0.912,0.883	-0.565
ENSG00000149547	EI24	11	+	125445146	125445304	125445200	125445304	125442353	125442465	58,67,46	15,5,5	19,12,15	14,12,19	133	86	4.1572e-08	3.04057e-06	0.714,0.897,0.856	0.467,0.393,0.338	0.423
ENSG00000115677	HDLBP	2	-	242174535	242174690	242174535	242174670	242174904	242175009	18,8,23	27,34,27	2,4,3	57,57,55	99	86	4.6892e-08	3.36243e-06	0.367,0.17,0.425	0.03,0.057,0.045	0.277
ENSG00000117632	STMN1	1	-	26227981	26230304	26227981	26228173	26231154	26231229	53,36,32	14,6,3	82,97,92	0,1,0	154	68	5.66375e-08	3.98314e-06	0.626,0.726,0.825	1.0,0.977,1.0	-0.267
ENSG00000119772	DNMT3A	2	-	25464430	25464646	25464430	25464576	25466766	25466851	32,36,43	2,1,1	4,6,6	7,5,4	141	78	6.27446e-08	4.32938e-06	0.898,0.952,0.96	0.24,0.399,0.453	0.573
ENSG00000124181	PLCG1	20	+	39802763	39802951	39802766	39802951	39802562	39802651	11,11,15	35,34,29	5,9,6	90,115,82	82	82	6.80766e-08	4.6103e-06	0.239,0.244,0.341	0.053,0.073,0.068	0.21
ENSG00000116922	C1orf109	1	-	38148990	38149148	38148990	38149113	38151944	38152124	13,7,15	6,3,3	1,1,1	8,14,10	114	86	1.01533e-07	6.75099e-06	0.62,0.638,0.79	0.086,0.051,0.07	0.614
ENSG00000000419	DPM1	20	-	49557401	49557492	49557401	49557470	49558567	49558663	15,14,11	4,2,3	4,0,3	11,11,11	84	62	1.13877e-07	7.43658e-06	0.735,0.838,0.73	0.212,0.0,0.168	0.641
ENSG00000167767	KRT80	12	-	52562779	52565341	52562779	52565306	52565981	52566202	31,45,34	21,21,23	34,33,29	1,2,4	114	86	1.99817e-07	1.28198e-05	0.527,0.618,0.527	0.962,0.926,0.845	-0.354
ENSG00000028310	BRD9	5	-	886706	886882	886706	886822	887475	887586	17,23,11	0,3,1	3,3,1	7,7,3	139	86	4.15683e-07	2.57653e-05	1.0,0.826,0.872	0.21,0.21,0.171	0.702
ENSG00000132780	NASP	1	+	46070588	46070688	46070607	46070688	46067926	46068037	10,7,11	9,3,5	0,3,0	12,18,15	86	74	4.09488e-07	2.57653e-05	0.489,0.668,0.654	0.0,0.125,0.0	0.562
ENSG00000197345	MRPL21	11	-	68663982	68664306	68663982	68664146	68665394	68665480	27,39,27	2,5,10	6,5,4	12,7,12	165	79	8.18095e-07	4.98629e-05	0.866,0.789,0.564	0.193,0.255,0.138	0.544
ENSG00000186866	POFUT2	21	-	46683842	46687628	46683842	46685550	46689753	46689934	36,24,25	51,52,41	17,7,12	4,0,0	172	86	9.19246e-07	5.50862e-05	0.261,0.188,0.234	0.68,1.0,1.0	-0.666
ENSG00000088038	CNOT3	19	+	54649277	54649553	54649330	54649553	54647972	54648068	24,15,9	4,15,2	9,5,8	36,28,39	132	86	9.3392e-07	5.50862e-05	0.796,0.394,0.746	0.14,0.104,0.118	0.525
ENSG00000143621	ILF2	1	-	153635494	153635752	153635494	153635609	153636871	153636950	2,7,8	33,28,27	2,10,6	0,0,2	158	72	9.55282e-07	5.54519e-05	0.027,0.102,0.119	1.0,1.0,0.578	-0.777
ENSG00000165801	ARHGEF40	14	+	21549031	21550278	21549667	21550278	21548818	21548941	1,0,2	37,34,31	5,6,5	15,6,7	172	86	9.85074e-07	5.62877e-05	0.013,0.0,0.031	0.143,0.333,0.263	-0.232
ENSG00000159352	PSMD4	1	+	151238479	151238915	151238783	151238915	151237869	151238085	4,3,4	5,9,7	14,19,13	1,0,2	172	86	1.12657e-06	6.33824e-05	0.286,0.143,0.222	0.875,1.0,0.765	-0.663
ENSG00000023191	RNH1	11	-	500483	500738	500483	500654	502061	502249	15,16,16	2,3,3	1,6,2	8,8,9	163	86	1.17974e-06	6.53684e-05	0.798,0.738,0.738	0.062,0.284,0.105	0.608
ENSG00000108443	RPS6KB1	17	+	58013575	58013902	58013824	58013902	58012553	58012661	1,0,0	50,36,52	1,5,2	2,1,0	157	71	1.38278e-06	7.54751e-05	0.009,0.0,0.0	0.184,0.693,1.0	-0.623
ENSG00000101361	NOP56	20	+	2635883	2636158	2635970	2636158	2635394	2635593	27,58,26	11,16,15	3,3,2	11,10,8	166	86	1.51651e-06	8.15568e-05	0.56,0.653,0.473	0.124,0.135,0.115	0.437
ENSG00000142541	RPL13A	19	+	49993488	49993833	49993731	49993833	49993106	49993179	507547487	11,7,11	510464500	0,0,0	152	66	1.68206e-06	8.91494e-05	0.952,0.971,0.951	1.0,1.0,1.0	-0.042
ENSG00000074047	GLI2	2	+	121732499	121732685	121732550	121732685	121729516	121729639	3,9,7	1,3,0	0,2,0	8,11,13	130	86	1.86822e-06	9.76013e-05	0.665,0.665,1.0	0.0,0.107,0.0	0.741
ENSG00000115414	FN1	2	-	216243852	216247048	216243852	216244040	216248050	216248206	147139134	20,19,15	82,85,68	2,0,0	172	86	1.89605e-06	9.76599e-05	0.786,0.785,0.817	0.953,1.0,1.0	-0.188
ENSG00000185122	HSF1	8	+	145537508	145537717	145537647	145537717	145537196	145537302	10,7,9	5,7,6	25,26,27	2,0,0	149	63	2.54965e-06	0.000129501	0.458,0.297,0.388	0.841,1.0,1.0	-0.566
ENSG00000003056	M6PR	12	-	9096000	9096180	9096000	9096131	9096396	9096506	15,13,18	1,2,1	5,1,5	7,3,9	128	86	3.06744e-06	0.000153666	0.91,0.814,0.924	0.324,0.183,0.272	0.623
ENSG00000185686	PRAME	22	-	22899231	22899506	22899231	22899350	22899964	22900000	21,24,24	20,20,28	12,9,6	32,34,34	115	29	3.91132e-06	0.000193293	0.209,0.232,0.178	0.086,0.063,0.043	0.142
ENSG00000189306	RRP7A	22	-	42912016	42912302	42912016	42912142	42914010	42914153	7,6,4	4,1,1	1,0,2	16,8,11	172	86	4.59052e-06	0.000223834	0.467,0.75,0.667	0.03,0.0,0.083	0.59
ENSG00000170248	PDCD6IP	3	+	33870329	33870461	33870344	33870461	33867971	33868072	51,64,40	2,0,1	12,11,16	2,4,7	94	86	4.89109e-06	0.000235351	0.959,1.0,0.973	0.846,0.716,0.676	0.231
ENSG00000175215	CTDSP2	12	-	58217686	58217872	58217686	58217788	58218009	58218102	47,59,44	2,1,0	27,28,19	7,6,6	163	86	9.23893e-06	0.000429964	0.925,0.969,1.0	0.671,0.711,0.626	0.295
ENSG00000198563	DDX39B	6	-	31506539	31506716	31506539	31506632	31506923	31507051	34,24,28	6,10,11	13,16,13	17,20,25	163	86	9.28825e-06	0.000429964	0.749,0.559,0.573	0.287,0.297,0.215	0.361
ENSG00000109332	UBE2D3	4	-	103747641	103748001	103747641	103747793	103748748	103749105	14,15,15	3,0,0	8,3,1	8,7,8	172	86	9.28056e-06	0.000429964	0.7,1.0,1.0	0.333,0.176,0.059	0.711
ENSG00000148143	ZNF462	9	+	109694543	109694830	109694726	109694830	109692805	109692970	38,30,25	13,14,9	9,5,8	24,14,8	172	86	1.00085e-05	0.000457515	0.594,0.517,0.581	0.158,0.152,0.333	0.35
ENSG00000064419	TNPO3	7	-	128630014	128630256	128630014	128630154	128632052	128632144	67,85,87	2,4,3	6,7,2	2,3,6	171	85	1.03977e-05	0.000469435	0.943,0.914,0.935	0.599,0.537,0.142	0.505
ENSG00000169231	THBS3	1	-	155169785	155170401	155169785	155169904	155170687	155170795	6,4,4	15,6,7	6,15,15	1,3,3	172	86	1.08418e-05	0.000483517	0.167,0.25,0.222	0.75,0.714,0.714	-0.513
ENSG00000204843	DCTN1	2	-	74593370	74593747	74593370	74593502	74593909	74594059	6,7,5	29,40,36	8,5,7	7,7,5	172	86	1.31804e-05	0.00058073	0.094,0.08,0.065	0.364,0.263,0.412	-0.267
ENSG00000185686	PRAME	22	-	22899231	22899397	22899231	22899329	22899964	22900000	11,12,15	4,6,5	7,6,5	16,11,17	90	29	1.51414e-05	0.00065919	0.47,0.392,0.492	0.124,0.149,0.087	0.331
ENSG00000175197	DDIT3	12	-	57911051	57911325	57911051	57911221	57911488	57911536	34,34,27	1,0,0	3,5,1	3,2,3	127	41	1.58547e-05	0.000682127	0.917,1.0,1.0	0.244,0.447,0.097	0.71
ENSG00000143952	VPS54	2	-	64208779	64209021	64208779	64208985	64210997	64211153	43,42,55	21,17,21	44,27,28	40,32,42	115	86	1.67169e-05	0.000710857	0.605,0.649,0.662	0.451,0.387,0.333	0.248
ENSG00000153914	SREK1	5	+	65460435	65460725	65460610	65460725	65459619	65459750	66,72,51	2,3,2	26,21,46	10,9,7	172	86	1.814e-05	0.000762505	0.943,0.923,0.927	0.565,0.538,0.767	0.308
ENSG00000008952	SEC62	3	+	169700447	169700699	169700494	169700699	169694733	169694839	5,4,8	3,2,2	0,1,0	10,7,8	126	86	1.93223e-05	0.000802974	0.532,0.577,0.732	0.0,0.089,0.0	0.584
ENSG00000057252	SOAT1	1	+	179311144	179311327	179311248	179311327	179310162	179310445	26,23,21	3,4,0	2,0,0	3,5,2	158	72	2.10897e-05	0.000866575	0.798,0.724,1.0	0.233,0.0,0.0	0.763
ENSG00000064419	TNPO3	7	-	128630014	128630256	128630014	128630154	128633860	128633968	65,87,81	6,2,6	4,3,2	3,2,2	172	86	2.22403e-05	0.000903698	0.844,0.956,0.871	0.4,0.429,0.333	0.503
ENSG00000170889	RPS9	19	+	54710143	54710592	54710420	54710592	54705354	54705477	107,110,93	7,10,6	97,107,94	0,0,0	172	86	2.40233e-05	0.000965419	0.884,0.846,0.886	1.0,1.0,1.0	-0.128
ENSG00000121022	COPS5	8	-	67955316	67958195	67955316	67955552	67963464	67963576	11,9,7	11,25,17	14,10,11	5,1,1	172	86	2.5206e-05	0.00100194	0.333,0.153,0.171	0.583,0.833,0.846	-0.535
ENSG00000174243	DDX23	12	-	49233795	49233934	49233795	49233889	49237722	49237833	13,12,15	2,2,3	0,1,5	9,8,5	124	86	2.71159e-05	0.00106627	0.818,0.806,0.776	0.0,0.08,0.41	0.637
ENSG00000101365	IDH3B	20	-	2640344	2640608	2640344	2640439	2640675	2640822	24,32,31	4,4,4	7,5,6	7,5,6	172	86	3.04941e-05	0.00118635	0.75,0.8,0.795	0.333,0.333,0.333	0.449
ENSG00000148143	ZNF462	9	+	109694546	109694830	109694726	109694830	109692805	109692970	10,18,15	13,14,9	3,1,3	24,14,8	172	86	3.68385e-05	0.00141809	0.278,0.391,0.455	0.059,0.034,0.158	0.291
ENSG00000057019	DCBLD2	3	-	98519422	98519602	98519422	98519560	98520443	98520493	43,40,47	6,6,10	3,5,3	5,4,6	78	43	3.8331e-05	0.00146017	0.798,0.786,0.722	0.249,0.408,0.216	0.478
ENSG00000119718	EIF2B2	14	+	75472568	75472664	75472599	75472664	75471439	75471603	64,71,66	4,2,2	281337297	1,1,1	86	58	4.80017e-05	0.00180972	0.915,0.96,0.957	0.995,0.996,0.995	-0.051
ENSG00000173575	CHD2	15	+	93521377	93521613	93521463	93521613	93518108	93518180	46,49,47	2,1,3	3,8,2	5,2,4	144	65	4.99883e-05	0.00186538	0.912,0.957,0.876	0.213,0.644,0.184	0.568
ENSG00000119777	TMEM214	2	+	27260657	27260760	27260682	27260760	27260428	27260570	8,2,1	0,1,1	0,0,0	14,9,21	89	71	5.50847e-05	0.00203479	1.0,0.615,0.444	0.0,0.0,0.0	0.686
ENSG00000136699	SMPD4	2	-	130914157	130914386	130914157	130914248	130914823	130914969	9,12,12	0,0,3	1,2,1	8,7,1	170	84	6.47923e-05	0.00236946	1.0,1.0,0.664	0.058,0.124,0.331	0.717
ENSG00000063177	RPL18	19	-	49120572	49120680	49120572	49120672	49121047	49121134	268270209	18,12,9	90,87,80	8,16,12	81	80	9.17822e-05	0.00332324	0.936,0.957,0.958	0.917,0.843,0.868	0.074
ENSG00000175197	DDIT3	12	-	57911051	57911378	57911051	57911207	57911488	57911536	36,37,36	23,36,34	10,13,10	32,29,20	127	41	0.000112906	0.004048	0.336,0.249,0.255	0.092,0.126,0.139	0.161
ENSG00000102103	PQBP1	X	+	48759509	48760072	48760008	48760072	48759206	48759319	8,5,5	5,3,6	12,20,13	0,0,1	143	57	0.000114763	0.00407463	0.389,0.399,0.249	1.0,1.0,0.838	-0.6
ENSG00000198755	RPL10A	6	+	35436723	35437306	35437157	35437306	35436575	35436650	62,72,61	34,30,28	64,44,61	9,11,8	154	68	0.000117443	0.00412969	0.446,0.515,0.49	0.758,0.638,0.771	-0.239
ENSG00000176986	SEC24C	10	+	75529104	75529491	75529372	75529491	75528764	75528910	1,1,0	6,13,13	2,5,2	0,1,1	172	86	0.000123074	0.00428648	0.077,0.037,0.0	1.0,0.714,0.5	-0.7
ENSG00000106244	PDAP1	7	-	99001020	99001148	99001020	99001128	99002484	99002576	9,11,7	6,6,6	7,12,14	22,31,41	98	85	0.000135279	0.00466714	0.565,0.614,0.503	0.216,0.251,0.228	0.329
ENSG00000177963	RIC8A	11	+	209174	209318	209270	209318	208799	208938	1,3,6	18,17,10	10,6,8	3,5,6	127	41	0.000149344	0.00510423	0.018,0.054,0.162	0.518,0.279,0.301	-0.288
ENSG00000114867	EIF4G1	3	+	184038630	184038781	184038714	184038781	184038417	184038510	38,46,31	4,4,2	3,5,4	7,2,3	137	60	0.000162417	0.00549961	0.806,0.834,0.872	0.158,0.523,0.369	0.487
ENSG00000115758	ODC1	2	-	10584599	10584773	10584599	10584673	10585056	10585175	22,13,13	5,0,0	28,32,26	22,23,28	153	67	0.000164176	0.00550819	0.658,1.0,1.0	0.358,0.379,0.289	0.544
ENSG00000084207	GSTP1	11	+	67352508	67352712	67352608	67352712	67352155	67352243	14,9,15	78,67,44	3,6,4	84,85,66	167	81	0.000170647	0.00567322	0.08,0.061,0.142	0.017,0.033,0.029	0.068
ENSG00000188976	NOC2L	1	-	889383	889903	889383	889462	891302	891393	24,18,23	1,1,1	8,6,3	3,4,7	156	70	0.000189054	0.00622855	0.915,0.89,0.912	0.545,0.402,0.161	0.536
ENSG00000075624	ACTB	7	-	5567634	5568350	5567634	5567816	5569165	5569294	559568422	3,2,4	45,34,23	0,3,1	172	86	0.000199771	0.00652287	0.989,0.993,0.981	1.0,0.85,0.92	0.064
ENSG00000184470	TXNRD2	22	-	19864562	19864757	19864562	19864735	19865612	19865710	29,34,47	3,1,2	30,21,24	9,5,11	101	86	0.000205268	0.00664307	0.892,0.967,0.952	0.739,0.781,0.65	0.214
ENSG00000107443	CCNJ	10	+	97816844	97817004	97816877	97817004	97816457	97816757	40,39,34	9,10,4	58,43,45	2,0,2	112	86	0.000239292	0.00767625	0.773,0.75,0.867	0.957,1.0,0.945	-0.171
ENSG00000129484	PARP2	14	+	20822967	20823106	20822993	20823106	20822243	20822406	1,0,0	22,22,23	3,6,5	12,10,14	105	86	0.000253637	0.00806567	0.036,0.0,0.0	0.17,0.33,0.226	-0.23
ENSG00000085872	CHERP	19	-	16641579	16641724	16641579	16641691	16643408	16643560	9,11,9	6,7,6	23,20,22	3,3,0	112	86	0.000287962	0.00905765	0.535,0.547,0.535	0.855,0.837,1.0	-0.358
ENSG00000183963	SMTN	22	+	31495047	31495882	31495730	31495882	31494652	31494826	0,0,0	25,34,48	2,1,1	3,13,3	172	86	0.000289785	0.00905765	0.0,0.0,0.0	0.25,0.037,0.143	-0.143
ENSG00000119725	ZNF410	14	+	74360478	74360635	74360499	74360635	74358729	74358911	25,37,32	3,1,4	0,2,1	2,2,2	100	86	0.00029886	0.00926211	0.878,0.97,0.873	0.0,0.462,0.301	0.653
ENSG00000149547	EI24	11	+	125445146	125445304	125445158	125445304	125442353	125442465	58,67,46	19,16,12	19,12,15	16,10,10	91	86	0.000306672	0.00942437	0.743,0.798,0.784	0.529,0.531,0.586	0.226
ENSG00000062194	GPBP1	5	+	56545235	56545403	56545280	56545403	56542901	56543042	6,3,4	4,12,3	0,4,2	31,29,22	124	86	0.000342957	0.0104516	0.51,0.148,0.48	0.0,0.087,0.059	0.331
ENSG00000088038	CNOT3	19	+	54649277	54649553	54649333	54649553	54647972	54648068	24,15,9	0,1,0	9,5,8	6,4,3	135	86	0.000349645	0.0105674	1.0,0.905,1.0	0.489,0.443,0.629	0.448
ENSG00000113812	ACTR8	3	-	53907058	53907173	53907058	53907154	53909974	53910107	2,1,0	21,24,24	2,1,1	0,1,0	98	86	0.00035477	0.0106344	0.077,0.035,0.0	1.0,0.467,1.0	-0.785
ENSG00000109046	WSB1	17	+	25634769	25636298	25636125	25636298	25633807	25633908	0,0,0	19,25,18	4,5,0	1,1,5	172	86	0.000361438	0.0107462	0.0,0.0,0.0	0.667,0.714,0.0	-0.46
ENSG00000219481	NBPF1	1	-	16894473	16894601	16894473	16894525	16895567	16895731	12,15,22	0,2,1	0,1,3	4,7,1	114	45	0.000372185	0.0109765	1.0,0.748,0.897	0.0,0.053,0.542	0.683
ENSG00000198467	TPM2	9	-	35681988	35682901	35681988	35682160	35684242	35684312	67,67,58	13,5,8	56,43,49	18,16,25	149	63	0.000376528	0.0110157	0.685,0.85,0.754	0.568,0.532,0.453	0.245
ENSG00000123562	MORF4L2	X	-	102933426	102933579	102933426	102933528	102940098	102940188	17,18,24	4,0,4	8,7,12	5,11,10	127	83	0.000423754	0.0122989	0.735,1.0,0.797	0.511,0.294,0.44	0.429
ENSG00000108039	XPNPEP1	10	-	111633124	111633335	111633124	111633185	111635285	111635357	9,6,9	2,1,3	1,1,0	6,5,2	119	33	0.000470837	0.0135579	0.555,0.625,0.454	0.044,0.053,0.0	0.512
ENSG00000091136	LAMB1	7	-	107572618	107572938	107572618	107572822	107575859	107576101	17,21,32	21,28,26	14,24,21	53,57,42	172	86	0.000517034	0.0147718	0.288,0.273,0.381	0.117,0.174,0.2	0.15
ENSG00000136986	DERL1	8	-	124026388	124031545	124026388	124027825	124033686	124033739	9,12,4	7,7,8	19,22,20	2,3,4	132	46	0.00056598	0.0160449	0.309,0.374,0.148	0.768,0.719,0.635	-0.43
ENSG00000197111	PCBP2	12	+	53862560	53862616	53862563	53862616	53861004	53861077	40,32,25	16,18,24	10,5,7	11,20,28	29	26	0.000585988	0.0164843	0.691,0.614,0.483	0.449,0.183,0.183	0.324
ENSG00000160948	VPS28	8	-	145652291	145652674	145652291	145652362	145653871	145653927	5,2,4	5,1,2	0,1,2	11,10,7	113	27	0.00063094	0.017515	0.193,0.323,0.323	0.0,0.023,0.064	0.251
ENSG00000141030	COPS3	17	-	17171198	17171359	17171198	17171291	17174071	17174121	20,25,21	8,4,9	0,0,2	5,2,5	104	43	0.000632207	0.017515	0.508,0.721,0.491	0.0,0.0,0.142	0.526
ENSG00000164880	INTS1	7	-	1524925	1525162	1524925	1525105	1526260	1526410	10,10,9	3,6,2	0,4,0	8,8,3	136	86	0.000688634	0.0189348	0.678,0.513,0.74	0.0,0.24,0.0	0.564
ENSG00000112130	RNF8	6	+	37336153	37336994	37336259	37336994	37328221	37328350	17,17,16	1,2,0	2,1,1	3,1,2	172	86	0.000731853	0.019973	0.895,0.81,1.0	0.25,0.333,0.2	0.641
ENSG00000168894	RNF181	2	+	85824075	85824301	85824226	85824301	85823641	85823772	32,28,30	66,65,82	26,9,19	84,80,97	154	68	0.00076122	0.0206206	0.176,0.16,0.139	0.12,0.047,0.08	0.076
ENSG00000071054	MAP4K4	2	+	102476104	102476326	102476197	102476326	102472438	102472600	21,38,29	34,34,34	14,20,11	3,5,6	172	86	0.000771364	0.0207418	0.236,0.358,0.299	0.7,0.667,0.478	-0.317
ENSG00000120708	TGFBI	5	+	135390363	135390550	135390404	135390550	135389631	135389769	62,91,75	7,17,7	14,13,7	8,4,5	120	86	0.000804294	0.0214694	0.864,0.793,0.885	0.556,0.7,0.501	0.262
ENSG00000154222	CC2D1B	1	-	52825376	52825555	52825376	52825508	52825745	52825905	7,8,17	1,3,3	3,1,0	6,6,1	126	86	0.00083138	0.0220316	0.827,0.645,0.795	0.254,0.102,0.0	0.637
ENSG00000142186	SCYL1	11	+	65304456	65304599	65304507	65304599	65304056	65304221	12,16,13	19,14,15	17,32,32	68,76,87	129	85	0.000867053	0.0228116	0.294,0.43,0.363	0.141,0.217,0.195	0.178
ENSG00000028203	VEZT	12	+	95692869	95694948	95693940	95694948	95689826	95690034	5,10,6	1,2,1	0,1,0	2,3,4	172	86	0.000991861	0.0259088	0.714,0.714,0.75	0.0,0.143,0.0	0.678
ENSG00000089737	DDX24	14	-	94521341	94524243	94521341	94521530	94526443	94526959	36,49,30	6,4,3	56,59,53	0,1,0	172	86	0.00108271	0.0280814	0.75,0.86,0.833	1.0,0.967,1.0	-0.175
ENSG00000228474	OST4	2	-	27293339	27293610	27293339	27293589	27294193	27294331	3,10,14	48,49,47	1,1,3	39,54,55	100	86	0.00111904	0.0288191	0.051,0.149,0.204	0.022,0.016,0.045	0.107
ENSG00000107443	CCNJ	10	+	97816844	97817004	97816880	97817004	97816457	97816757	40,39,34	26,25,23	58,43,45	18,11,14	115	86	0.00116111	0.0296936	0.535,0.538,0.525	0.707,0.745,0.706	-0.187
ENSG00000156232	WHAMM	15	+	83495139	83495248	83495161	83495248	83491851	83492039	11,7,10	40,37,35	4,0,1	35,38,32	95	80	0.00122871	0.0312042	0.188,0.137,0.194	0.088,0.0,0.026	0.135
ENSG00000004059	ARF5	7	+	127229538	127230191	127230119	127230191	127229136	127229217	27,25,29	16,23,14	19,27,17	3,6,3	139	53	0.00126831	0.0319875	0.392,0.293,0.441	0.707,0.632,0.684	-0.299
ENSG00000105204	DYRK1B	19	-	40317311	40317627	40317311	40317507	40317924	40318065	54,37,30	1,0,0	36,46,33	13,1,13	172	86	0.00131784	0.0323445	0.964,1.0,1.0	0.581,0.958,0.559	0.289
ENSG00000132305	IMMT	2	-	86398330	86398504	86398330	86398435	86400772	86400884	5,3,5	3,1,3	2,1,0	7,9,6	148	86	0.00130826	0.0323445	0.492,0.635,0.492	0.142,0.061,0.0	0.472
ENSG00000101639	CEP192	18	+	13057583	13059311	13059080	13059311	13055778	13056697	0,0,0	21,6,6	0,2,4	1,2,2	172	86	0.00131491	0.0323445	0.0,0.0,0.0	0.0,0.333,0.5	-0.278
ENSG00000109805	NCAPG	4	+	17825269	17825393	17825294	17825393	17824605	17824746	37,55,40	2,2,4	265244266	5,0,7	104	86	0.00130943	0.0323445	0.939,0.958,0.892	0.978,1.0,0.969	-0.053
ENSG00000112763	BTN2A1	6	+	26467946	26469865	26468175	26469865	26466289	26466316	6,6,7	6,6,13	7,4,9	1,0,1	106	20	0.00133126	0.032456	0.159,0.159,0.092	0.569,1.0,0.629	-0.596
ENSG00000259486	ZIM2	19	-	57335629	57335882	57335629	57335795	57337755	57337831	5,5,5	1,0,1	3,4,2	7,5,9	149	69	0.00136083	0.0329573	0.698,1.0,0.698	0.166,0.27,0.093	0.622
ENSG00000204628	GNB2L1	5	-	180663936	180664319	180663936	180664042	180664608	180664719	6,9,6	55,55,43	2,1,1	53,61,58	172	86	0.00141693	0.0340902	0.052,0.076,0.065	0.019,0.008,0.009	0.052
ENSG00000101444	AHCY	20	-	32878137	32878444	32878137	32878255	32878536	32878744	44,46,48	6,4,5	61,46,54	0,1,0	172	86	0.00146704	0.0350652	0.786,0.852,0.828	1.0,0.958,1.0	-0.164
ENSG00000076108	BAZ2A	12	-	57000030	57000179	57000030	57000096	57000416	57000517	13,20,11	1,4,2	3,2,1	5,3,2	135	59	0.00153675	0.0364928	0.85,0.686,0.706	0.208,0.226,0.179	0.543
ENSG00000131051	RBM39	20	-	34297145	34297196	34297145	34297178	34300940	34301018	8,5,5	28,26,26	15,14,12	20,18,23	29	11	0.00158544	0.0374062	0.098,0.068,0.068	0.221,0.228,0.165	-0.127
ENSG00000168078	PBK	8	-	27668474	27668684	27668474	27668651	27678081	27678211	4,8,8	5,10,6	3,3,1	15,16,10	112	86	0.00173033	0.0405629	0.381,0.381,0.506	0.133,0.126,0.071	0.313
ENSG00000074071	MRPS34	16	-	1821890	1822535	1821890	1822514	1822604	1822647	3,3,4	10,2,8	1,0,3	22,24,23	50	36	0.00182017	0.0423971	0.178,0.519,0.265	0.032,0.0,0.086	0.281
ENSG00000117640	FAM54B	1	+	26156035	26156321	26156108	26156321	26153105	26153317	2,1,8	0,2,6	1,1,0	19,19,23	152	86	0.00187122	0.0433104	1.0,0.221,0.43	0.029,0.029,0.0	0.531
ENSG00000198721	ECI2	6	-	4117541	4119509	4117541	4117685	4125483	4126471	6,5,4	16,10,11	17,14,11	7,7,11	172	86	0.00192224	0.0442115	0.158,0.2,0.154	0.548,0.5,0.333	-0.29
ENSG00000132305	IMMT	2	-	86398330	86398468	86398330	86398435	86400772	86400884	6,3,4	3,1,3	0,3,0	7,9,6	112	86	0.00193867	0.0443107	0.606,0.697,0.506	0.0,0.204,0.0	0.535
ENSG00000163946	FAM208A	3	-	56667071	56667994	56667071	56667871	56672733	56672793	2,2,1	1,0,0	1,1,3	13,10,12	139	53	0.00199422	0.0452973	0.433,1.0,1.0	0.028,0.037,0.087	0.76
ENSG00000117523	PRRC2C	1	+	171482133	171482311	171482139	171482311	171481170	171481339	4,6,2	8,6,14	3,1,0	29,34,17	86	86	0.00202042	0.045609	0.333,0.5,0.125	0.094,0.029,0.0	0.278
ENSG00000144136	SLC20A1	2	+	113416401	113416671	113416527	113416671	113414698	113414818	5,1,1	10,21,16	5,6,4	4,4,0	172	86	0.00207862	0.0466351	0.2,0.023,0.03	0.385,0.429,1.0	-0.52
ENSG00000187778	MCRS1	12	-	49952996	49953115	49952996	49953084	49953235	49953318	1,4,2	1,1,1	1,0,1	8,8,8	95	71	0.00209544	0.0467257	0.428,0.749,0.599	0.085,0.0,0.085	0.535
ENSG00000149428	HYOU1	11	-	118917128	118917179	118917128	118917174	118917273	118917514	21,16,28	7,9,19	13,10,9	15,18,18	44	39	0.00212663	0.0471339	0.727,0.612,0.566	0.434,0.33,0.307	0.278

## Sheet: A5SS
GeneID	geneSymbol	chr	strand	longExonStart_0base	longExonEnd	shortES	shortEE	flankingES	flankingEE	IJC_SAMPLE_1	SJC_SAMPLE_1	IJC_SAMPLE_2	SJC_SAMPLE_2	IncFormLen	SkipFormLen	PValue	FDR	IncLevel1	IncLevel2	IncLevelDifference
ENSG00000132424	PNISR	6	-	99851704	99852578	99852478	99852578	99850415	99850586	2,2,5	27,23,38	36,33,25	6,2,7	172	86	0	0	0.036,0.042,0.062	0.75,0.892,0.641	-0.714
ENSG00000166986	MARS	12	+	57905790	57906136	57905790	57905886	57906533	57906747	18,14,13	99,95,65	36,35,34	3,1,1	172	86	0	0	0.083,0.069,0.091	0.857,0.946,0.944	-0.835
ENSG00000214078	CPNE1	20	-	34220084	34220307	34220232	34220307	34219866	34219947	13,7,11	51,61,48	16,19,19	0,2,3	142	56	0	0	0.091,0.043,0.083	1.0,0.789,0.714	-0.762
ENSG00000105193	RPS16	19	-	39924161	39924401	39924304	39924401	39923851	39924058	77,98,56	514533471	62,80,84	16,16,12	172	86	0	0	0.07,0.084,0.056	0.66,0.714,0.778	-0.647
ENSG00000147403	RPL10	X	+	153627678	153627935	153627678	153627737	153628143	153628282	107,112,97	96,94,109	85,59,79	2,3,4	138	52	0	0	0.296,0.31,0.251	0.941,0.881,0.882	-0.616
ENSG00000156482	RPL30	8	-	99057170	99057627	99057574	99057627	99054872	99055003	167134111	276282303	129136162	57,39,67	132	46	0	0	0.174,0.142,0.113	0.441,0.549,0.457	-0.339
ENSG00000135506	OS9	12	+	58109542	58109976	58109542	58109753	58110194	58110295	51,43,42	40,35,36	57,41,43	0,2,2	172	86	0	0	0.389,0.381,0.368	1.0,0.911,0.915	-0.563
ENSG00000139620	KANSL2	12	-	49075164	49075424	49075353	49075424	49073437	49073616	103,89,84	16,17,12	43,57,53	49,61,60	150	64	0	0	0.733,0.691,0.749	0.272,0.285,0.274	0.447
ENSG00000139620	KANSL2	12	-	49075164	49076008	49075969	49076008	49073437	49073616	103,89,84	202258189	43,57,53	4,4,2	118	32	0	0	0.121,0.086,0.108	0.745,0.794,0.878	-0.701
ENSG00000127314	RAP1B	12	+	69004708	69004832	69004708	69004823	69042478	69042561	115130113	63,80,57	9,14,6	47,49,39	78	76	0	0	0.64,0.613,0.659	0.157,0.218,0.13	0.469
ENSG00000026025	VIM	10	+	17277844	17278378	17277844	17277888	17279228	17279592	140160108	24,28,40	160169170	0,0,1	123	37	0	0	0.637,0.632,0.448	1.0,1.0,0.981	-0.421
ENSG00000026025	VIM	10	+	17277167	17278378	17277167	17277388	17279228	17279592	145162112	68,104,72	160168172	0,2,2	172	86	0	0	0.516,0.438,0.438	1.0,0.977,0.977	-0.521
ENSG00000113758	DBN1	5	-	176894481	176894818	176894743	176894818	176894255	176894333	8,3,2	209185177	17,16,19	2,6,0	139	53	0	0	0.014,0.006,0.004	0.764,0.504,1.0	-0.748
ENSG00000204628	GNB2L1	5	-	180668491	180669345	180669173	180669345	180666486	180666582	155,140,97	108,131,86	113135160	1,0,4	172	86	0	0	0.418,0.348,0.361	0.983,1.0,0.952	-0.603
ENSG00000089195	TRMT6	20	-	5924472	5924677	5924593	5924677	5924204	5924329	52,61,53	1,2,1	13,4,5	13,8,10	163	77	1.11022e-16	1.96658e-14	0.961,0.935,0.962	0.321,0.191,0.191	0.718
ENSG00000177697	CD151	11	+	834529	834803	834529	834591	836062	836153	39,48,37	14,21,14	3,9,2	25,25,27	139	53	3.33067e-16	5.53099e-14	0.515,0.466,0.502	0.044,0.121,0.027	0.43
ENSG00000168264	IRF2BP2	1	-	234744192	234745271	234744240	234745271	234740014	234743598	207182181	67,90,65	126,123,93	135145145	127	86	2.44249e-15	3.81747e-13	0.677,0.578,0.653	0.387,0.365,0.303	0.284
ENSG00000142541	RPL13A	19	+	49994035	49994356	49994035	49994121	49994681	49994804	30,29,18	35,32,28	21,25,34	1,2,1	165	79	6.43929e-15	9.50511e-13	0.291,0.303,0.235	0.91,0.857,0.942	-0.627
ENSG00000127314	RAP1B	12	+	69004708	69004836	69004708	69004832	69042478	69042561	21,18,35	115127112	21,17,12	9,13,6	76	76	4.59632e-13	6.4276e-11	0.154,0.124,0.238	0.7,0.567,0.667	-0.473
ENSG00000139651	ZNF740	12	+	53575460	53575974	53575460	53575776	53578674	53578824	17,13,15	3,5,4	18,8,15	57,48,50	172	86	4.92384e-13	6.54132e-11	0.739,0.565,0.652	0.136,0.077,0.13	0.538
ENSG00000153071	DAB2	5	-	39392305	39392565	39392466	39392565	39390545	39390677	43,55,46	9,9,7	5,5,11	18,17,14	172	86	7.81264e-13	9.88485e-11	0.705,0.753,0.767	0.122,0.128,0.282	0.564
ENSG00000127774	TMEM93	17	+	3572089	3572306	3572089	3572193	3572391	3572962	34,17,20	22,22,31	37,43,32	242198295	172	86	8.7419e-13	1.05578e-10	0.436,0.279,0.244	0.071,0.098,0.051	0.246
ENSG00000135018	UBQLN1	9	-	86281264	86284242	86284099	86284242	86279944	86280060	0,1,4	78,99,70	7,9,5	13,15,10	172	86	1.01941e-12	1.17764e-10	0.0,0.005,0.028	0.212,0.231,0.2	-0.203
ENSG00000117335	CD46	1	+	207940357	207943707	207940357	207940540	207956636	207956675	0,1,1	139174176	2,2,6	3,5,4	118	32	1.8604e-12	2.05962e-10	0.0,0.002,0.002	0.153,0.098,0.289	-0.179
ENSG00000169045	HNRNPH1	5	-	179043869	179044111	179044021	179044111	179043126	179043219	48,40,31	171257223	49,55,67	84,113,70	169	83	3.35987e-12	3.57087e-10	0.121,0.071,0.064	0.223,0.193,0.32	-0.16
ENSG00000175634	RPS6KB2	11	+	67200422	67200665	67200422	67200513	67200810	67200918	22,33,18	9,19,10	1,1,3	20,21,14	170	84	6.84841e-12	6.99855e-10	0.547,0.462,0.471	0.024,0.023,0.096	0.446
ENSG00000100823	APEX1	14	+	20923736	20924260	20923736	20923862	20924826	20925019	15,16,7	44,44,49	23,21,26	11,11,7	172	86	7.14795e-12	7.03411e-10	0.146,0.154,0.067	0.511,0.488,0.65	-0.427
ENSG00000168522	FNTA	8	+	42932358	42935584	42932358	42932507	42938260	42938323	106,83,97	0,3,1	37,39,24	9,16,7	142	56	1.12781e-11	1.07021e-09	1.0,0.916,0.975	0.619,0.49,0.575	0.402
ENSG00000177697	CD151	11	+	834529	834745	834529	834591	836062	836153	44,48,39	14,21,14	12,13,8	25,25,27	139	53	3.40823e-11	3.12264e-09	0.545,0.466,0.515	0.155,0.165,0.102	0.368
ENSG00000182944	EWSR1	22	+	29684594	29687588	29684594	29684775	29688125	29688158	3,7,8	7,14,13	20,27,24	1,2,0	112	26	6.45149e-11	5.71387e-09	0.09,0.104,0.125	0.823,0.758,1.0	-0.754
ENSG00000166012	TAF1D	11	-	93469859	93470405	93470229	93470405	93469306	93469470	8,8,13	324437365	1,3,4	2,5,6	172	86	1.04222e-10	8.93279e-09	0.012,0.009,0.017	0.2,0.231,0.25	-0.214
ENSG00000204843	DCTN1	2	-	74593585	74594059	74593909	74594059	74593370	74593502	1,1,3	29,40,36	9,7,6	7,7,5	172	86	1.62868e-10	1.35231e-08	0.017,0.012,0.04	0.391,0.333,0.375	-0.343
ENSG00000104866	PPP1R37	19	+	45643763	45643919	45643763	45643864	45644579	45644644	54,48,68	2,0,1	1,6,4	6,4,6	106	58	2.40406e-10	1.93563e-08	0.937,1.0,0.974	0.084,0.451,0.267	0.703
ENSG00000070756	PABPC1	8	-	101730000	101730508	101730314	101730508	101727689	101727829	81,107,78	28,13,13	88,69,91	0,0,0	172	86	1.02485e-09	8.00893e-08	0.591,0.805,0.75	1.0,1.0,1.0	-0.285
ENSG00000213722	DDAH2	6	-	31695949	31696522	31696422	31696522	31695319	31695469	5,2,3	33,24,21	6,16,8	0,1,3	172	86	1.69265e-09	1.28496e-07	0.07,0.04,0.067	1.0,0.889,0.571	-0.761
ENSG00000115464	USP34	2	-	61433894	61436112	61436033	61436112	61433151	61433259	1,1,1	27,17,21	6,4,2	1,0,0	158	72	2.39896e-09	1.77057e-07	0.017,0.026,0.021	0.732,1.0,1.0	-0.889
ENSG00000213782	DDX47	12	+	12976136	12976950	12976136	12976253	12977473	12977611	37,25,30	83,63,80	7,2,11	0,0,1	172	86	8.95244e-09	6.42882e-07	0.182,0.166,0.158	1.0,1.0,0.846	-0.78
ENSG00000110321	EIF4G2	11	-	10821098	10821895	10821636	10821895	10820759	10820971	43,51,44	12,15,10	56,53,47	1,0,0	172	86	1.58759e-08	1.11006e-06	0.642,0.63,0.688	0.966,1.0,1.0	-0.335
ENSG00000124120	TTPAL	20	+	43112976	43113170	43112976	43113068	43115235	43115346	23,36,23	1,0,2	5,2,2	6,4,5	171	85	2.72233e-08	1.85468e-06	0.92,1.0,0.851	0.293,0.199,0.166	0.704
ENSG00000146670	CDCA5	11	-	64850835	64851022	64850956	64851022	64846824	64847259	4,0,3	17,29,13	3,6,4	0,1,0	145	59	6.99571e-08	4.6469e-06	0.087,0.0,0.086	1.0,0.709,1.0	-0.845
ENSG00000112282	MED23	6	-	131913527	131914311	131914145	131914311	131912452	131912667	0,1,0	37,33,15	6,4,3	1,1,4	172	86	9.98474e-08	6.4706e-06	0.0,0.015,0.0	0.75,0.667,0.273	-0.558
ENSG00000139620	KANSL2	12	-	49054148	49054402	49054250	49054402	49048723	49048843	216220203	9,5,6	65,66,61	14,12,6	172	86	1.54752e-07	9.78988e-06	0.923,0.957,0.944	0.699,0.733,0.836	0.185
ENSG00000155506	LARP1	5	+	154173359	154173560	154173359	154173482	154173659	154173822	7,6,7	2,2,2	7,3,6	22,24,23	157	86	1.64417e-07	1.01594e-05	0.657,0.622,0.657	0.148,0.064,0.125	0.533
ENSG00000178209	PLEC	8	-	145009178	145009285	145009190	145009285	145008977	145009097	7,10,12	43,45,38	4,5,1	94,94,106	91	86	3.27186e-07	1.97576e-05	0.133,0.174,0.23	0.039,0.048,0.009	0.147
ENSG00000111203	ITFG2	12	+	2927271	2927519	2927271	2927443	2929251	2929391	5,6,3	16,31,21	1,5,1	109126113	155	86	3.89475e-07	2.29963e-05	0.148,0.097,0.073	0.005,0.022,0.005	0.095
ENSG00000142731	PLK4	4	+	128806862	128807883	128806862	128807781	128808550	128808651	26,36,16	0,1,3	8,10,6	14,6,10	172	86	5.48004e-07	3.16532e-05	1.0,0.947,0.727	0.222,0.455,0.231	0.589
ENSG00000101084	C20orf24	20	+	35238003	35238161	35238003	35238133	35240412	35240960	55,63,52	5,15,11	1,10,4	11,13,5	107	86	8.97796e-07	4.96968e-05	0.898,0.771,0.792	0.068,0.382,0.391	0.54
ENSG00000131795	RBM8A	1	+	145508015	145508284	145508015	145508075	145508474	145508611	9,7,5	13,15,18	16,12,7	2,2,0	139	53	8.92303e-07	4.96968e-05	0.209,0.151,0.096	0.753,0.696,1.0	-0.664
ENSG00000137955	RABGGTB	1	+	76254843	76256202	76254843	76255041	76256969	76257022	3,0,1	7,9,19	5,8,7	0,2,1	132	46	1.11901e-06	6.06778e-05	0.13,0.0,0.018	1.0,0.582,0.709	-0.714
ENSG00000121774	KHDRBS1	1	+	32503435	32503720	32503435	32503637	32504152	32504220	22,30,22	6,0,4	4,6,7	12,8,14	137	61	1.30202e-06	6.78326e-05	0.62,1.0,0.71	0.129,0.25,0.182	0.59
ENSG00000197622	CDC42SE1	1	-	151027491	151028469	151028152	151028469	151026706	151026797	1,6,1	60,49,41	6,6,1	7,12,3	170	84	1.29906e-06	6.78326e-05	0.008,0.057,0.012	0.298,0.198,0.141	-0.187
ENSG00000100395	L3MBTL2	22	+	41613126	41615540	41613126	41613206	41616737	41616872	1,0,2	14,23,24	6,3,8	0,2,0	159	73	1.44002e-06	7.35795e-05	0.032,0.0,0.037	1.0,0.408,1.0	-0.78
ENSG00000148303	RPL7A	9	+	136217094	136217582	136217094	136217174	136217856	136217926	107,71,80	6,7,12	92100115	0,0,0	136	50	1.89519e-06	9.50099e-05	0.868,0.789,0.71	1.0,1.0,1.0	-0.211
ENSG00000143418	CERS2	1	-	150939867	150940190	150940139	150940190	150939549	150939678	1,5,1	16,20,18	7,6,3	0,2,0	130	44	2.53137e-06	0.000124553	0.021,0.078,0.018	1.0,0.504,1.0	-0.796
ENSG00000139624	CERS5	12	-	50528182	50528485	50528328	50528485	50523581	50524477	15,31,16	1,1,1	2,2,1	4,3,3	172	86	3.26474e-06	0.000157717	0.882,0.939,0.889	0.2,0.25,0.143	0.706
ENSG00000137955	RABGGTB	1	+	76253181	76256202	76253181	76253289	76256969	76257022	51,39,51	5,4,10	78,77,91	0,1,0	132	46	5.92084e-06	0.000275994	0.78,0.773,0.64	1.0,0.964,1.0	-0.257
ENSG00000142541	RPL13A	19	+	49993106	49993554	49993106	49993179	49993731	49993833	268314225	11,7,11	204230204	0,0,0	152	66	5.85527e-06	0.000275994	0.914,0.951,0.899	1.0,1.0,1.0	-0.079
ENSG00000198755	RPL10A	6	+	35436575	35436804	35436575	35436650	35437157	35437306	74,67,71	34,30,28	60,63,77	9,11,8	154	68	6.88349e-06	0.000315335	0.49,0.497,0.528	0.746,0.717,0.81	-0.253
ENSG00000160299	PCNT	21	+	47851442	47852129	47851442	47851892	47855816	47856061	50,48,49	12,9,11	48,76,75	51,45,41	172	86	1.06279e-05	0.000478615	0.676,0.727,0.69	0.32,0.458,0.478	0.279
ENSG00000173402	DAG1	3	+	49507564	49508006	49507564	49507866	49547851	49548252	2,16,6	36,44,40	2,0,1	66,64,49	172	86	1.21228e-05	0.000536837	0.027,0.154,0.07	0.015,0.0,0.01	0.075
ENSG00000131899	LLGL1	17	+	18140148	18141087	18140148	18140253	18141380	18141528	3,5,10	21,20,13	8,7,10	2,3,3	172	86	1.35369e-05	0.00058963	0.067,0.111,0.278	0.667,0.538,0.625	-0.458
ENSG00000070756	PABPC1	8	-	101727689	101727829	101727698	101727829	101725314	101725409	101,76,80	46,51,42	62,61,50	77,59,62	88	86	1.71685e-05	0.000735753	0.682,0.593,0.651	0.44,0.503,0.441	0.181
ENSG00000109445	ZNF330	4	+	142142083	142142231	142142083	142142170	142143519	142143645	14,15,11	2,0,2	4,0,2	9,3,4	134	80	2.62534e-05	0.00110723	0.807,1.0,0.767	0.21,0.0,0.23	0.711
ENSG00000131051	RBM39	20	-	34326889	34328809	34328745	34328809	34319862	34320057	47,48,58	18,18,21	21,27,20	1,0,1	143	57	3.37356e-05	0.00140055	0.51,0.515,0.524	0.893,1.0,0.889	-0.411
ENSG00000197448	GSTK1	7	+	142962084	142962389	142962084	142962185	142964709	142964826	6,7,6	15,19,20	17,21,14	11,11,11	172	86	4.05629e-05	0.00165809	0.167,0.156,0.13	0.436,0.488,0.389	-0.287
ENSG00000145868	FBXO38	5	+	147806775	147807510	147806775	147807285	147812986	147813087	8,7,4	19,14,12	2,0,4	52,31,22	172	86	4.1696e-05	0.00167858	0.174,0.2,0.143	0.019,0.0,0.083	0.138
ENSG00000104805	NUCB1	19	+	49404042	49404378	49404042	49404188	49407603	49407711	12,21,21	17,10,12	1,1,2	5,14,15	172	86	4.77862e-05	0.00189504	0.261,0.512,0.467	0.091,0.034,0.063	0.351
ENSG00000172766	NAA16	13	+	41936166	41937009	41936166	41936295	41941574	41941788	5,10,3	143112121	11,6,5	25,47,42	172	86	5.07683e-05	0.0019837	0.017,0.043,0.012	0.18,0.06,0.056	-0.075
ENSG00000132341	RAN	12	+	131356614	131357174	131356614	131356671	131357547	131357673	8,8,3	185231142	2,1,2	0,2,3	136	50	6.48126e-05	0.00249576	0.016,0.013,0.008	1.0,0.155,0.197	-0.438
ENSG00000082014	SMARCD3	7	-	150939550	150939689	150939566	150939689	150939222	150939318	10,14,14	28,18,19	11,30,17	6,4,7	95	86	6.59519e-05	0.00250335	0.244,0.413,0.4	0.624,0.872,0.687	-0.375
ENSG00000113810	SMC4	3	+	160130113	160130637	160130113	160130241	160131260	160131401	6,2,13	2,2,4	1,5,1	8,11,19	172	86	8.31009e-05	0.00310985	0.6,0.333,0.619	0.059,0.185,0.026	0.427
ENSG00000146701	MDH2	7	+	75677478	75677840	75677478	75677544	75684147	75684316	36,37,28	21,21,17	7,12,12	25,14,23	145	59	8.72819e-05	0.00322094	0.411,0.418,0.401	0.102,0.259,0.175	0.231
ENSG00000127314	RAP1B	12	+	69004708	69004836	69004708	69004832	69047891	69048032	0,2,3	163179149	2,0,0	7,6,1	86	86	9.46474e-05	0.0034449	0.0,0.011,0.02	0.222,0.0,0.0	-0.064
ENSG00000162734	PEA15	1	+	160181332	160181506	160181332	160181440	160182899	160183055	57,59,59	16,27,20	42,62,45	45,42,39	145	86	0.000141667	0.00508663	0.679,0.564,0.636	0.356,0.467,0.406	0.217
ENSG00000172354	GNB2	7	+	100275120	100275441	100275120	100275283	100275720	100275922	37,34,32	18,21,9	14,20,15	0,0,1	172	86	0.000159772	0.00561161	0.507,0.447,0.64	1.0,1.0,0.882	-0.429
ENSG00000090615	GOLGA3	12	-	133351651	133351891	133351726	133351891	133350742	133350906	2,3,2	39,34,38	0,0,1	197147174	154	86	0.000160513	0.00561161	0.028,0.047,0.029	0.0,0.0,0.003	0.034
ENSG00000234741	GAS5	1	-	173834366	173834685	173834608	173834685	173833812	173833842	0,1,1	7,3,7	2,7,4	0,1,0	93	7	0.000189169	0.00652758	0.0,0.024,0.011	1.0,0.345,1.0	-0.77
ENSG00000204628	GNB2L1	5	-	180668491	180669345	180669169	180669345	180666486	180666582	155,140,97	6,6,5	113135160	0,0,0	172	86	0.000205382	0.00699617	0.928,0.921,0.907	1.0,1.0,1.0	-0.081
ENSG00000126773	C14orf135	14	+	60590935	60591969	60590935	60591028	60592354	60592541	3,4,8	1,2,2	14,6,7	19,22,26	172	86	0.000292373	0.00983336	0.6,0.5,0.667	0.269,0.12,0.119	0.42
ENSG00000080845	DLGAP4	20	+	35154253	35154480	35154253	35154409	35155215	35155634	64,57,41	8,11,12	14,16,18	8,12,11	150	86	0.000340818	0.0113194	0.821,0.748,0.662	0.501,0.433,0.484	0.271
ENSG00000136603	SKIL	3	+	170102320	170102553	170102320	170102415	170108010	170108252	16,14,7	1,4,1	1,3,1	1,7,6	172	86	0.000354194	0.0116184	0.889,0.636,0.778	0.333,0.176,0.077	0.572
ENSG00000198561	CTNND1	11	+	57529268	57529591	57529268	57529518	57558856	57559145	2,3,3	0,1,0	4,0,1	9,10,13	152	86	0.000361194	0.0117036	1.0,0.629,1.0	0.201,0.0,0.042	0.795
ENSG00000175470	PPP2R2D	10	+	133754085	133754345	133754085	133754198	133757471	133757649	35,36,33	7,3,4	9,3,3	6,2,6	172	86	0.000417074	0.0133514	0.714,0.857,0.805	0.429,0.429,0.2	0.439
ENSG00000136271	DDX56	7	-	44612161	44612343	44612172	44612343	44611945	44612036	124170147	11,18,20	62,63,58	12,26,12	88	84	0.00045259	0.0143158	0.915,0.9,0.875	0.831,0.698,0.822	0.113
ENSG00000070756	PABPC1	8	-	101730314	101730508	101730410	101730508	101730000	101730116	41,51,40	13,20,13	58,54,39	42,39,35	172	86	0.000461779	0.0144347	0.612,0.56,0.606	0.408,0.409,0.358	0.201
ENSG00000108179	PPIF	10	+	81111242	81111470	81111242	81111339	81112072	81112148	48,46,40	2,0,1	13,18,9	3,3,4	155	69	0.000484077	0.0149557	0.914,1.0,0.947	0.659,0.728,0.5	0.325
ENSG00000177666	PNPLA2	11	+	823693	824130	823693	823855	824313	824436	2,2,1	16,14,22	3,5,8	3,7,1	172	86	0.000499977	0.0152694	0.059,0.067,0.022	0.333,0.263,0.8	-0.416
ENSG00000107679	PLEKHA1	10	+	124187791	124187936	124187791	124187832	124189139	124191867	8,7,8	10,4,8	11,3,1	20,24,19	120	34	0.000509779	0.0153918	0.185,0.331,0.221	0.135,0.034,0.015	0.184
ENSG00000076067	RBMS2	12	+	56981337	56981448	56981337	56981443	56982077	56982158	6,12,11	4,4,1	5,4,5	14,15,7	74	74	0.000520604	0.0155421	0.6,0.75,0.917	0.263,0.211,0.417	0.459
ENSG00000175390	EIF3F	11	+	8013327	8013518	8013327	8013398	8013630	8013710	15,16,12	2,2,0	3,9,6	4,7,6	137	51	0.000660986	0.0193783	0.736,0.749,1.0	0.218,0.324,0.271	0.557
ENSG00000084733	RAB10	2	+	26350012	26350147	26350012	26350102	26350718	26350820	5,6,5	14,14,11	0,0,0	15,21,11	121	83	0.000663689	0.0193783	0.197,0.227,0.238	0.0,0.0,0.0	0.221
ENSG00000177697	CD151	11	+	834529	834803	834529	834745	836062	836153	9,7,6	5,0,2	2,0,1	9,4,6	135	84	0.000843211	0.0243523	0.528,1.0,0.651	0.121,0.0,0.094	0.655
ENSG00000061273	HDAC7	12	-	48177861	48179254	48179169	48179254	48176508	48177669	2,1,4	15,12,22	1,3,4	1,0,1	164	78	0.000988624	0.0279419	0.06,0.038,0.08	0.322,1.0,0.655	-0.6
ENSG00000166855	CLPX	15	-	65449115	65449270	65449181	65449270	65448029	65448194	3,1,4	25,17,39	5,4,0	135122159	141	82	0.000999051	0.0279419	0.065,0.033,0.056	0.021,0.019,0.0	0.038
ENSG00000175061	C17orf76-AS1	17	+	16342640	16343017	16342640	16342728	16343498	16343567	19,21,17	42,34,36	48,43,42	54,39,30	143	57	0.000993027	0.0279419	0.153,0.198,0.158	0.262,0.305,0.358	-0.139
ENSG00000143621	ILF2	1	-	153635494	153635752	153635690	153635752	153635180	153635271	16,15,13	12,6,11	16,18,27	4,0,0	139	53	0.00102648	0.0284099	0.337,0.488,0.311	0.604,1.0,1.0	-0.489
ENSG00000111667	USP5	12	+	6972349	6972541	6972349	6972472	6972993	6973137	39,33,30	193201175	21,38,35	293325301	148	86	0.00110377	0.0302343	0.105,0.087,0.091	0.04,0.064,0.063	0.039
ENSG00000112655	PTK7	6	+	43109909	43111358	43109909	43110037	43112188	43112344	5,20,11	50,32,37	18,19,20	22,23,25	172	86	0.00112988	0.0306337	0.048,0.238,0.129	0.29,0.292,0.286	-0.151
ENSG00000101773	RBBP8	18	+	20513838	20514122	20513838	20514041	20516716	20516923	0,2,0	2,3,1	0,0,0	18,23,29	160	86	0.00115541	0.0310093	0.0,0.264,0.0	0.0,0.0,0.0	0.088
ENSG00000117308	GALE	1	-	24122998	24123272	24123186	24123272	24122640	24122755	5,4,2	27,13,21	17,14,9	8,12,25	165	79	0.00120998	0.0321491	0.081,0.128,0.044	0.504,0.358,0.147	-0.252
ENSG00000175110	MRPS22	3	+	139069020	139069902	139069020	139069164	139071488	139071634	4,10,4	16,12,8	9,4,9	3,2,1	172	86	0.00148493	0.0390639	0.111,0.294,0.2	0.6,0.5,0.818	-0.438
ENSG00000087088	BAX	19	+	49458804	49459090	49458804	49458856	49459454	49459590	32,37,24	45,27,38	60,59,64	36,38,30	131	45	0.00165962	0.0432314	0.196,0.32,0.178	0.364,0.348,0.423	-0.147
ENSG00000162909	CAPN2	1	+	223949282	223949441	223949282	223949319	223949887	223949953	4,5,4	6,4,6	0,0,0	9,7,12	89	3	0.00172848	0.0445881	0.022,0.04,0.022	0.0,0.0,0.0	0.028
ENSG00000106009	BRAT1	7	-	2582837	2583596	2583223	2583596	2581753	2581845	0,0,1	8,6,3	2,6,3	1,2,0	171	85	0.0017545	0.0448241	0.0,0.0,0.142	0.499,0.599,1.0	-0.652

## Sheet: IntronRetention
GeneID	geneSymbol	chr	strand	riExonStart_0base	riExonEnd	upstreamES	upstreamEE	downstreamES	downstreamEE	IJC_SAMPLE_1	SJC_SAMPLE_1	IJC_SAMPLE_2	SJC_SAMPLE_2	IncFormLen	SkipFormLen	PValue	FDR	IncLevel1	IncLevel2	IncLevelDifference
ENSG00000206560	ANKRD28	3	-	15727508	15727816	15727508	15727626	15727728	15727816	156152131	0,0,2	4,0,0	4,3,5	167	81	1.88738e-15	8.65161e-14	1.0,1.0,0.969	0.327,0.0,0.0	0.881
ENSG00000115548	KDM3A	2	+	86718263	86719839	86718263	86718398	86719161	86719839	32,20,26	0,2,1	0,3,0	3,7,2	172	86	3.66148e-08	6.96223e-07	1.0,0.833,0.929	0.0,0.176,0.0	0.862
ENSG00000127054	CPSF3L	1	-	1255835	1256473	1255835	1255909	1256375	1256473	17,7,6	0,0,1	1,1,0	6,5,2	153	67	5.67665e-06	7.39693e-05	1.0,1.0,0.724	0.068,0.081,0.0	0.858
ENSG00000198276	UCKL1	20	-	62572302	62572561	62572302	62572396	62572462	62572561	6,7,8	0,1,0	0,0,2	2,5,4	118	86	0.000135819	0.00124517	1.0,0.836,1.0	0.0,0.0,0.267	0.856
ENSG00000084774	CAD	2	+	27465487	27465841	27465487	27465643	27465739	27465841	64,38,58	4,4,2	0,1,0	6,4,3	172	86	2.98085e-11	9.10933e-10	0.889,0.826,0.935	0.0,0.111,0.0	0.846
ENSG00000168397	ATG4B	2	+	242590424	242590750	242590424	242590526	242590678	242590750	73,75,64	8,3,2	3,1,0	13,18,9	151	65	0	0	0.797,0.915,0.932	0.09,0.023,0.0	0.844
ENSG00000112651	MRPL2	6	-	43023634	43023934	43023634	43023745	43023818	43023934	2,2,3	0,0,1	2,0,0	7,4,11	132	86	0.000793872	0.00597616	1.0,1.0,0.662	0.157,0.0,0.0	0.835
ENSG00000076108	BAZ2A	12	-	57008797	57009391	57008797	57008912	57009002	57009391	1,4,3	0,1,0	0,1,1	2,5,6	166	86	0.00424792	0.0253105	1.0,0.675,1.0	0.0,0.094,0.079	0.834
ENSG00000102103	PQBP1	X	+	48755538	48755859	48755538	48755629	48755774	48755859	7,7,4	1,0,0	0,1,0	1,1,4	162	76	0.00592005	0.0337706	0.767,1.0,1.0	0.0,0.319,0.0	0.816
ENSG00000127054	CPSF3L	1	-	1247972	1248329	1247972	1248080	1248166	1248329	4,6,1	1,0,0	0,0,3	4,3,4	158	86	0.00824729	0.0449486	0.685,1.0,1.0	0.0,0.0,0.29	0.798
ENSG00000106009	BRAT1	7	-	2581753	2583596	2581753	2581845	2582837	2583596	4,2,2	0,0,1	0,0,1	2,6,3	171	85	0.0088358	0.0475503	1.0,1.0,0.499	0.0,0.0,0.142	0.786
ENSG00000102054	RBBP7	X	-	16863950	16867424	16863950	16864061	16867366	16867424	32,30,27	1,3,0	2,3,3	8,5,11	137	51	8.2383e-12	2.71125e-10	0.923,0.788,1.0	0.085,0.183,0.092	0.784
ENSG00000122557	HERPUD2	7	-	35733793	35734745	35733793	35734237	35734410	35734745	5,2,2	1,0,0	1,1,5	8,7,8	172	86	0.0016065	0.0109678	0.714,1.0,1.0	0.059,0.067,0.238	0.783
ENSG00000133107	TRPC4	13	-	38210979	38211762	38210979	38211365	38211620	38211762	5,11,7	0,1,0	3,4,3	8,7,10	172	86	2.77578e-06	3.87251e-05	1.0,0.846,1.0	0.158,0.222,0.13	0.779
ENSG00000090674	MCOLN1	19	+	7592405	7592846	7592405	7592514	7592749	7592846	23,41,29	1,2,5	8,11,10	63,70,41	172	86	0	0	0.92,0.911,0.744	0.06,0.073,0.109	0.778
ENSG00000159352	PSMD4	1	+	151237307	151237710	151237307	151237394	151237641	151237710	23,24,20	2,3,0	1,2,5	13,10,12	142	56	2.49989e-12	8.9128e-11	0.819,0.759,1.0	0.029,0.073,0.141	0.778
ENSG00000156515	HK1	10	+	71144088	71144671	71144088	71144237	71144551	71144671	7,13,8	0,2,2	1,0,0	4,1,5	172	86	0.000317459	0.00264583	1.0,0.765,0.667	0.111,0.0,0.0	0.774
ENSG00000165792	METTL17	14	+	21461276	21462222	21461276	21461350	21462127	21462222	11,7,7	0,3,0	0,1,1	4,3,5	153	67	0.000829369	0.00620697	1.0,0.505,1.0	0.0,0.127,0.081	0.766
ENSG00000204580	DDR1	6	+	30856464	30856787	30856464	30856591	30856684	30856787	23,5,9	2,1,1	2,0,0	7,2,3	172	86	1.16253e-05	0.000139449	0.852,0.714,0.818	0.125,0.0,0.0	0.753
ENSG00000184702	2017-09-05	22	+	19709759	19710842	19709759	19709862	19709950	19710842	25,18,11	6,1,2	0,0,1	6,2,5	162	86	2.95772e-06	4.03854e-05	0.689,0.905,0.745	0.0,0.0,0.096	0.748
ENSG00000066322	ELOVL1	1	-	43830598	43831047	43830598	43830679	43830856	43831047	6,4,7	0,2,0	0,0,4	2,4,6	160	74	0.00806881	0.0441634	1.0,0.481,1.0	0.0,0.0,0.236	0.748
ENSG00000204469	PRRC2A	6	+	31603358	31603826	31603358	31603526	31603743	31603826	24,21,19	2,3,2	0,1,1	6,5,4	162	76	2.70077e-08	5.40121e-07	0.849,0.767,0.817	0.0,0.086,0.105	0.747
ENSG00000110274	CEP164	11	+	117265635	117265907	117265635	117265719	117265838	117265907	14,15,15	1,1,0	0,3,2	5,2,8	139	53	6.51054e-06	8.11289e-05	0.842,0.851,1.0	0.0,0.364,0.087	0.747
ENSG00000144591	GMPPA	2	+	220364842	220366759	220364842	220364940	220366197	220366759	71,68,81	5,7,4	4,3,2	14,8,9	172	86	0	0	0.877,0.829,0.91	0.125,0.158,0.1	0.744
ENSG00000130508	PXDN	2	-	1667376	1668846	1667376	1667535	1668729	1668846	340298287	17,24,16	13,6,8	25,34,22	172	86	0	0	0.909,0.861,0.9	0.206,0.081,0.154	0.743
ENSG00000119688	ABCD4	14	-	74763035	74764772	74763035	74763152	74764341	74764772	81,70,83	1,4,7	14,14,15	29,50,33	172	86	0	0	0.976,0.897,0.856	0.194,0.123,0.185	0.742
ENSG00000135837	CEP350	1	+	180080131	180082515	180080131	180080330	180081571	180082515	3,2,4	0,0,1	1,2,4	7,9,5	172	86	0.00351006	0.0216594	1.0,1.0,0.667	0.067,0.1,0.286	0.738
ENSG00000014216	CAPN1	11	+	64977319	64977567	64977319	64977388	64977488	64977567	18,25,20	3,1,2	0,1,0	5,2,1	134	48	5.2317e-05	0.000518524	0.682,0.9,0.782	0.0,0.152,0.0	0.737
ENSG00000115091	ACTR3	2	+	114709296	114713283	114709296	114709422	114713199	114713283	198199200	13,8,9	15,17,14	42,33,30	163	77	0	0	0.878,0.922,0.913	0.144,0.196,0.181	0.731
ENSG00000116478	HDAC1	1	+	32797276	32797843	32797276	32797407	32797690	32797843	58,50,53	8,8,4	1,0,3	10,12,7	172	86	7.99361e-15	3.36387e-13	0.784,0.758,0.869	0.048,0.0,0.176	0.729
ENSG00000172732	MUS81	11	+	65633281	65633910	65633281	65633365	65633456	65633910	16,13,9	1,0,0	0,2,3	9,1,5	159	77	3.20633e-05	0.000330548	0.886,1.0,1.0	0.0,0.492,0.225	0.723
ENSG00000173039	RELA	11	-	65429407	65429676	65429407	65429559	65429649	65429676	42,49,50	2,6,1	3,3,0	5,8,9	100	20	1.93497e-11	6.05741e-10	0.808,0.62,0.909	0.107,0.07,0.0	0.72
ENSG00000181929	PRKAG1	12	-	49399088	49399326	49399088	49399147	49399244	49399326	17,13,19	3,0,0	2,2,0	2,2,8	127	41	7.40226e-05	0.000709015	0.647,1.0,1.0	0.244,0.244,0.0	0.72
ENSG00000184863	RBM33	7	+	155530753	155532720	155530753	155531097	155532408	155532720	57,64,27	4,6,4	0,1,0	1,1,1	172	86	0.00362944	0.0222889	0.877,0.842,0.771	0.0,0.333,0.0	0.719
ENSG00000196378	ZNF34	8	-	146003422	146003910	146003422	146003549	146003823	146003910	39,47,31	3,4,4	2,2,0	7,3,4	166	80	5.31659e-08	9.88964e-07	0.862,0.85,0.789	0.121,0.243,0.0	0.712
ENSG00000163938	GNL3	3	+	52724607	52725087	52724607	52724720	52724960	52725087	28,32,28	1,3,2	7,6,4	17,11,13	172	86	4.55191e-15	1.94746e-13	0.933,0.842,0.875	0.171,0.214,0.133	0.711
ENSG00000161217	PCYT1A	3	-	195974237	195975194	195974237	195974389	195975077	195975194	1,4,7	1,0,1	0,0,0	11,9,6	172	86	0.000881957	0.00654331	0.333,1.0,0.778	0.0,0.0,0.0	0.704
ENSG00000179632	MAF1	8	+	145161245	145161577	145161245	145161367	145161457	145161577	19,29,31	2,6,8	1,2,1	15,24,11	166	86	1.11022e-16	5.37725e-15	0.831,0.715,0.668	0.033,0.041,0.045	0.698
ENSG00000158092	NCK1	3	+	136664424	136665137	136664424	136664594	136664993	136665137	3,4,6	2,0,0	5,0,3	9,3,10	172	86	0.00857071	0.0463179	0.429,1.0,1.0	0.217,0.0,0.13	0.694
ENSG00000142208	AKT1	14	-	105239214	105239716	105239214	105239429	105239587	105239716	93103102	6,7,3	10,9,9	10,25,26	172	86	0	0	0.886,0.88,0.944	0.333,0.153,0.148	0.692
ENSG00000111602	TIMELESS	12	-	56814352	56814665	56814352	56814471	56814596	56814665	18,10,10	0,0,1	2,2,1	3,3,1	148	62	0.000477467	0.00379461	1.0,1.0,0.807	0.218,0.218,0.295	0.692
ENSG00000255717	SNHG1	11	-	62622359	62622688	62622359	62622410	62622604	62622688	2,5,6	0,1,1	3,3,0	13,9,17	121	35	1.15329e-05	0.000138991	1.0,0.591,0.634	0.063,0.088,0.0	0.691
ENSG00000070047	PHRF1	11	+	581491	582081	581491	581606	581964	582081	77,93,90	9,6,13	2,6,4	20,11,11	172	86	0	0	0.811,0.886,0.776	0.048,0.214,0.154	0.686
ENSG00000152465	NMT2	10	-	15175051	15175362	15175051	15175143	15175243	15175362	15,13,20	0,1,0	1,2,1	2,1,4	171	85	0.00026093	0.00222527	1.0,0.866,1.0	0.199,0.499,0.111	0.686
ENSG00000177595	PIDD	11	-	800761	801120	800761	800912	801001	801120	9,19,16	1,2,3	0,3,2	3,5,9	164	86	5.7373e-06	7.4382e-05	0.825,0.833,0.737	0.0,0.239,0.104	0.684
ENSG00000214706	IFRD2	3	-	50327359	50327725	50327359	50327517	50327600	50327725	82,96,79	5,2,0	1,4,3	3,4,4	152	86	3.00728e-10	7.87724e-09	0.903,0.964,1.0	0.159,0.361,0.298	0.683
ENSG00000184584	TMEM173	5	-	138860374	138861289	138860374	138860483	138860743	138861289	60,77,54	1,7,4	3,4,3	9,7,4	172	86	4.13469e-12	1.43429e-10	0.968,0.846,0.871	0.143,0.222,0.273	0.682
ENSG00000168894	RNF181	2	+	85824226	85824704	85824226	85824301	85824567	85824704	66,76,69	6,15,9	4,8,3	22,28,20	154	68	0	0	0.829,0.691,0.772	0.074,0.112,0.062	0.681
ENSG00000159840	ZYX	7	+	143079340	143079778	143079340	143079540	143079685	143079778	431403375	38,45,37	45,63,33	137112133	172	86	0	0	0.85,0.817,0.835	0.141,0.22,0.11	0.677
ENSG00000182979	MTA1	14	+	105935803	105936329	105935803	105935835	105936177	105936329	38,26,40	1,3,0	32,36,30	36,33,31	111	25	9.57464e-11	2.70089e-09	0.895,0.661,1.0	0.167,0.197,0.179	0.671
ENSG00000242802	AP5Z1	7	+	4829462	4830222	4829462	4829560	4830089	4830222	7,13,13	0,1,0	1,3,1	2,3,1	172	86	0.00179135	0.0121651	1.0,0.867,1.0	0.2,0.333,0.333	0.667
ENSG00000105443	CYTH2	19	+	48978094	48981402	48978094	48978206	48981325	48981402	110,109,85	16,13,23	16,14,5	91,77,100	156	70	0	0	0.755,0.79,0.624	0.073,0.075,0.022	0.666
ENSG00000026036	RTEL1	20	+	62309497	62309699	62309497	62309536	62309620	62309699	8,6,12	0,2,0	5,10,10	6,24,11	86	18	0.000765176	0.00579412	1.0,0.386,1.0	0.149,0.08,0.16	0.666
ENSG00000120699	EXOSC8	13	+	37577070	37578698	37577070	37577144	37578652	37578698	13,7,8	1,1,0	1,1,2	2,2,3	106	20	0.00824224	0.0449486	0.71,0.569,1.0	0.086,0.086,0.112	0.665
ENSG00000100425	BRD1	22	-	50181037	50181535	50181037	50181142	50181224	50181535	22,31,28	1,0,1	6,7,4	6,13,6	150	86	6.46008e-11	1.84256e-09	0.927,1.0,0.941	0.364,0.236,0.277	0.664
ENSG00000241945	PWP2	21	+	45540832	45542238	45540832	45540983	45542057	45542238	22,24,23	4,0,3	0,1,2	1,2,2	172	86	0.00417763	0.0251737	0.733,1.0,0.793	0.0,0.2,0.333	0.664
ENSG00000138074	SLC5A6	2	-	27425680	27426213	27425680	27425748	27426100	27426213	7,23,15	3,2,2	0,0,1	5,4,4	147	61	2.55292e-05	0.000274198	0.492,0.827,0.757	0.0,0.0,0.094	0.661
ENSG00000167548	MLL2	12	-	49424062	49424551	49424062	49424222	49424383	49424551	42,47,39	9,13,9	2,0,3	57,43,46	172	86	0	0	0.7,0.644,0.684	0.017,0.0,0.032	0.66
ENSG00000163930	BAP1	3	-	52440268	52440923	52440268	52440392	52440844	52440923	57,71,69	9,16,12	10,11,9	82,80,82	158	72	0	0	0.743,0.669,0.724	0.053,0.059,0.048	0.659
ENSG00000162298	SYVN1	11	-	64897473	64897851	64897473	64897647	64897722	64897851	51,83,65	11,12,15	4,8,8	27,43,31	136	86	0	0	0.746,0.814,0.733	0.086,0.105,0.14	0.654
ENSG00000133858	ZFC3H1	12	-	72004837	72005667	72004837	72004877	72005565	72005667	6,3,3	1,1,0	4,7,5	26,39,37	119	33	3.45593e-06	4.6447e-05	0.625,0.454,1.0	0.041,0.047,0.036	0.652
ENSG00000227057	WDR46	6	-	33255924	33256247	33255924	33256012	33256134	33256247	61,72,59	11,7,4	9,6,0	13,9,9	167	81	2.36175e-10	6.31523e-09	0.729,0.833,0.877	0.251,0.244,0.0	0.648
ENSG00000139579	OBFC2B	12	+	56619962	56620203	56619962	56620044	56620139	56620203	113114117	0,3,1	4,3,5	2,2,6	132	46	1.77892e-10	4.80683e-09	1.0,0.93,0.976	0.411,0.343,0.225	0.642
ENSG00000088038	CNOT3	19	+	54647395	54647870	54647395	54647485	54647741	54647870	189185181	5,1,3	9,6,4	12,3,7	169	83	0	0	0.949,0.989,0.967	0.269,0.496,0.219	0.64
ENSG00000105221	AKT2	19	-	40742163	40743998	40742163	40742292	40743875	40743998	33,29,33	1,0,1	7,7,5	4,11,7	172	86	2.73969e-09	6.33584e-08	0.943,1.0,0.943	0.467,0.241,0.263	0.638
ENSG00000175197	DDIT3	12	-	57911051	57911536	57911051	57911378	57911488	57911536	31,36,36	3,3,4	3,1,6	6,8,7	127	41	5.8733e-09	1.27769e-07	0.769,0.795,0.744	0.139,0.039,0.217	0.638
ENSG00000156256	USP16	21	+	30414792	30415920	30414792	30414849	30415743	30415920	32,39,26	1,1,1	6,4,9	4,7,7	136	50	5.72029e-08	1.0564e-06	0.922,0.935,0.905	0.355,0.174,0.321	0.637
ENSG00000169045	HNRNPH1	5	-	179050037	179051670	179050037	179050165	179050636	179051670	24,17,22	1,7,10	1,0,1	9,9,14	172	86	1.06768e-07	1.90329e-06	0.923,0.548,0.524	0.053,0.0,0.034	0.636
ENSG00000115307	AUP1	2	-	74755877	74756409	74755877	74756062	74756258	74756409	21,14,17	0,0,3	4,8,6	6,6,13	172	86	4.85702e-06	6.42679e-05	1.0,1.0,0.739	0.25,0.4,0.188	0.634
ENSG00000163930	BAP1	3	-	52440268	52440923	52440268	52440338	52440844	52440923	51,64,50	0,0,1	5,9,10	6,5,5	135	49	5.17532e-10	1.27844e-08	1.0,1.0,0.948	0.232,0.395,0.421	0.633
ENSG00000144591	GMPPA	2	+	220370975	220371709	220370975	220371144	220371419	220371709	35,18,26	1,3,3	2,5,2	6,9,3	172	86	1.79995e-07	3.14317e-06	0.946,0.75,0.813	0.143,0.217,0.25	0.633
ENSG00000174744	BRMS1	11	-	66108244	66108804	66108244	66108517	66108676	66108804	67,58,56	6,4,1	1,6,6	7,4,7	172	86	4.50695e-08	8.50687e-07	0.848,0.879,0.966	0.067,0.429,0.3	0.632
ENSG00000197694	SPTAN1	9	+	131386606	131387458	131386606	131386766	131387381	131387458	19,7,11	4,0,2	6,4,3	9,13,7	156	70	3.00336e-05	0.000314242	0.681,1.0,0.712	0.23,0.121,0.161	0.627
ENSG00000136279	DBNL	7	+	44098030	44098582	44098030	44098079	44098500	44098582	16,21,20	1,1,2	4,1,1	5,2,1	117	31	0.000426834	0.00343475	0.809,0.848,0.726	0.175,0.117,0.209	0.627
ENSG00000136247	ZDHHC4	7	+	6617064	6617351	6617064	6617129	6617220	6617351	9,17,9	2,3,1	3,1,0	5,6,5	140	58	2.63644e-05	0.000280819	0.651,0.701,0.789	0.199,0.065,0.0	0.626
ENSG00000163930	BAP1	3	-	52436794	52437314	52436794	52436887	52437153	52437314	21,18,11	3,1,2	1,1,0	2,1,4	172	86	0.00107101	0.00770109	0.778,0.9,0.733	0.2,0.333,0.0	0.626
ENSG00000173276	ZNF295	21	-	43406939	43414217	43406939	43411998	43412601	43414217	3,1,3	2,0,1	0,1,1	10,6,6	172	86	0.00596266	0.0339382	0.429,1.0,0.6	0.0,0.077,0.077	0.625
ENSG00000167566	NCKAP5L	12	-	50184928	50186371	50184928	50185834	50186228	50186371	218191223	6,10,2	49,64,54	46,75,56	172	86	0	0	0.948,0.905,0.982	0.348,0.299,0.325	0.621
ENSG00000143207	RFWD2	1	-	175957423	175958615	175957423	175957548	175958497	175958615	10,11,9	4,3,1	1,1,0	7,5,4	172	86	8.01299e-05	0.000759017	0.556,0.647,0.818	0.067,0.091,0.0	0.621
ENSG00000213782	DDX47	12	+	12976136	12976950	12976136	12976253	12976803	12976950	19,15,18	2,2,4	2,0,2	3,2,4	172	86	0.000889987	0.00658385	0.826,0.789,0.692	0.25,0.0,0.2	0.619
ENSG00000115307	AUP1	2	-	74756258	74756626	74756258	74756409	74756488	74756626	11,9,7	0,2,1	2,3,4	5,7,6	144	86	0.000183489	0.0016242	1.0,0.729,0.807	0.193,0.204,0.285	0.618
ENSG00000197114	ZGPAT	20	+	62364938	62366176	62364938	62365064	62366056	62366176	67,70,71	2,5,3	32,31,30	35,59,25	172	86	0	0	0.944,0.875,0.922	0.314,0.208,0.375	0.615
ENSG00000142949	PTPRF	1	+	44085765	44086250	44085765	44085892	44086124	44086250	59,48,65	3,3,1	4,5,1	7,2,3	172	86	1.51208e-06	2.24365e-05	0.908,0.889,0.97	0.222,0.556,0.143	0.615
ENSG00000111642	CHD4	12	-	6692192	6692544	6692192	6692279	6692363	6692544	13,14,9	1,4,0	6,2,6	10,12,5	148	80	0.000179187	0.0015916	0.875,0.654,1.0	0.245,0.083,0.393	0.603
ENSG00000154222	CC2D1B	1	-	52826095	52826804	52826095	52826221	52826645	52826804	49,50,63	3,3,3	2,5,2	4,3,3	172	86	2.20433e-06	3.16119e-05	0.891,0.893,0.913	0.2,0.455,0.25	0.597
ENSG00000129460	NGDN	14	+	23946408	23946769	23946408	23946565	23946711	23946769	6,6,14	0,1,5	2,4,2	6,6,6	137	51	0.00321589	0.0202333	1.0,0.691,0.51	0.11,0.199,0.11	0.594
ENSG00000138442	WDR12	2	-	203748920	203749258	203748920	203749026	203749117	203749258	5,5,5	0,3,1	0,4,2	10,6,6	168	86	0.00411725	0.0248682	1.0,0.46,0.719	0.0,0.254,0.146	0.593
ENSG00000110583	NAA40	11	+	63713311	63714475	63713311	63713407	63714422	63714475	17,16,7	0,0,1	10,15,17	6,17,12	132	46	6.35216e-05	0.000617651	1.0,1.0,0.709	0.367,0.235,0.331	0.592
ENSG00000070047	PHRF1	11	+	581491	582081	581491	581597	581964	582081	78,93,90	0,2,2	2,6,4	6,3,2	172	86	1.45307e-08	3.05739e-07	1.0,0.959,0.957	0.143,0.5,0.5	0.591
ENSG00000213593	TMX2	11	+	57506135	57506511	57506135	57506242	57506445	57506511	13,8,9	1,0,0	11,11,10	11,5,9	145	59	0.000440835	0.00352531	0.841,1.0,1.0	0.289,0.472,0.311	0.59
ENSG00000143418	CERS2	1	-	150939867	150940190	150939867	150939960	150940139	150940190	34,29,20	1,0,2	3,3,1	2,2,1	130	44	0.00123916	0.00878707	0.92,1.0,0.772	0.337,0.337,0.253	0.588
ENSG00000136718	IMP4	2	+	131103351	131103685	131103351	131103506	131103590	131103685	80,80,57	4,3,4	5,6,11	7,8,9	154	86	1.28086e-12	4.69711e-11	0.918,0.937,0.888	0.285,0.295,0.406	0.586
ENSG00000167965	MLST8	16	+	2258450	2259398	2258450	2258614	2258759	2259398	50,65,66	0,3,3	1,4,8	6,2,4	172	86	2.76077e-06	3.87251e-05	1.0,0.915,0.917	0.077,0.5,0.5	0.585
ENSG00000167552	TUBA1A	12	-	49580092	49580616	49580092	49580241	49580393	49580616	813754765	28,30,30	49,45,42	45,36,49	172	86	0	0	0.936,0.926,0.927	0.353,0.385,0.3	0.584
ENSG00000185627	PSMD13	11	+	244040	244469	244040	244216	244425	244469	63,41,50	1,7,0	2,1,3	2,2,1	123	37	0.00196496	0.013239	0.95,0.638,1.0	0.231,0.131,0.474	0.584
ENSG00000147687	TATDN1	8	-	125506073	125507783	125506073	125506200	125507712	125507783	9,10,10	1,4,0	2,2,3	4,4,5	150	64	0.00517398	0.030117	0.793,0.516,1.0	0.176,0.176,0.204	0.584
ENSG00000060138	CSDA	12	-	10854558	10856747	10854558	10854733	10856649	10856747	112,111,90	3,4,8	11,2,11	11,7,5	172	86	4.44184e-09	9.82948e-08	0.949,0.933,0.849	0.333,0.125,0.524	0.583
ENSG00000102882	MAPK3	16	-	30127956	30128324	30127956	30128111	30128214	30128324	5,12,7	3,1,2	1,0,0	2,5,5	172	86	0.00137915	0.00964656	0.455,0.857,0.636	0.2,0.0,0.0	0.583
ENSG00000136003	ISCU	12	+	108957835	108958168	108957835	108957931	108958054	108958168	7,10,9	3,2,0	2,3,2	5,7,5	172	86	0.00206627	0.0137412	0.538,0.714,1.0	0.167,0.176,0.167	0.581
ENSG00000135924	DNAJB2	2	+	220145299	220146493	220145299	220145409	220146439	220146493	22,18,21	1,2,2	3,2,2	3,3,2	133	47	0.000614239	0.00482187	0.886,0.761,0.788	0.261,0.191,0.261	0.574
ENSG00000182199	SHMT2	12	+	57625993	57626358	57625993	57626075	57626235	57626358	76,80,68	2,7,4	9,6,13	10,9,8	161	75	3.38163e-11	9.97775e-10	0.947,0.842,0.888	0.295,0.237,0.431	0.571
ENSG00000104522	TSTA3	8	-	144696489	144696867	144696489	144696623	144696793	144696867	40,45,30	2,1,2	3,10,6	5,4,7	153	67	2.17454e-06	3.13598e-05	0.898,0.952,0.868	0.208,0.523,0.273	0.571
ENSG00000066654	THUMPD1	16	-	20744990	20748608	20744990	20747680	20748181	20748608	69,70,50	8,2,5	28,13,24	36,13,29	172	86	0	0	0.812,0.946,0.833	0.28,0.333,0.293	0.562
ENSG00000162576	MXRA8	1	-	1289572	1289889	1289572	1289612	1289733	1289889	40,35,38	1,2,2	12,5,9	7,3,7	119	33	8.16381e-07	1.27851e-05	0.917,0.829,0.84	0.322,0.316,0.263	0.562
ENSG00000204843	DCTN1	2	-	74593370	74593747	74593370	74593502	74593585	74593747	7,5,4	1,1,3	1,1,2	9,7,6	152	86	0.000800482	0.0060083	0.798,0.739,0.43	0.059,0.075,0.159	0.558
ENSG00000100722	ZC3H14	14	+	89075610	89076147	89075610	89075747	89076055	89076147	2,11,2	1,0,1	1,0,2	6,4,3	171	85	0.00856547	0.0463179	0.499,1.0,0.499	0.077,0.0,0.249	0.557
ENSG00000227057	WDR46	6	-	33246884	33247387	33246884	33247151	33247273	33247387	4,9,7	1,1,1	1,1,2	3,2,3	172	86	0.0091068	0.0486012	0.667,0.818,0.778	0.143,0.2,0.25	0.557
ENSG00000186635	ARAP1	11	-	72423482	72424288	72423482	72423613	72424220	72424288	24,20,27	1,1,0	8,6,5	7,2,6	147	61	2.37431e-05	0.000259356	0.909,0.892,1.0	0.322,0.555,0.257	0.556
ENSG00000106397	PLOD3	7	-	100855126	100855655	100855126	100855231	100855533	100855655	146141112	16,19,15	12,14,9	19,14,24	172	86	0	0	0.82,0.788,0.789	0.24,0.333,0.158	0.555
ENSG00000143761	ARF1	1	+	228284778	228285153	228284778	228284963	228285042	228285153	133166126	29,21,24	12,21,9	28,34,24	144	86	0	0	0.733,0.825,0.758	0.204,0.269,0.183	0.553
ENSG00000076706	MCAM	11	-	119183479	119185286	119183479	119183659	119185198	119185286	11,13,3	2,2,0	4,12,10	8,12,11	167	81	0.00144213	0.0100324	0.727,0.759,1.0	0.195,0.327,0.306	0.553
ENSG00000178719	GRINA	8	+	145066045	145066541	145066045	145066246	145066412	145066541	24,17,25	8,5,2	1,6,6	13,10,15	172	86	5.4915e-07	8.92195e-06	0.6,0.63,0.862	0.037,0.231,0.167	0.552
ENSG00000107959	PITRM1	10	-	3199121	3199723	3199121	3199256	3199626	3199723	31,41,16	0,4,1	1,3,2	3,1,2	172	86	0.00128057	0.0090061	1.0,0.837,0.889	0.143,0.6,0.333	0.55
ENSG00000174243	DDX23	12	-	49230351	49230820	49230351	49230577	49230676	49230820	121122108	2,0,0	6,8,4	2,5,5	172	86	3.06808e-11	9.15786e-10	0.968,1.0,1.0	0.6,0.444,0.286	0.546
ENSG00000108039	XPNPEP1	10	-	111635285	111637625	111635285	111635357	111637547	111637625	19,31,22	2,4,5	3,2,3	2,9,15	136	50	1.06052e-06	1.63016e-05	0.777,0.74,0.618	0.355,0.076,0.068	0.545
ENSG00000188827	SLX4	16	-	3650979	3652308	3650979	3651192	3652118	3652308	2,1,1	2,1,0	1,1,0	33,26,32	172	86	0.000376356	0.0030573	0.333,0.333,1.0	0.015,0.019,0.0	0.544
ENSG00000064961	HMG20B	19	+	3576258	3576623	3576258	3576305	3576550	3576623	31,36,18	3,2,6	5,3,3	9,20,13	106	20	3.04253e-09	6.85104e-08	0.661,0.773,0.361	0.095,0.028,0.042	0.543
ENSG00000172354	GNB2	7	+	100274315	100275038	100274315	100274422	100274974	100275038	102110108	11,14,13	12,5,6	9,11,10	143	57	1.33421e-10	3.68271e-09	0.787,0.758,0.768	0.347,0.153,0.193	0.54
ENSG00000225163	C14orf63	14	+	97411385	97411731	97411385	97411487	97411574	97411731	27,37,21	2,1,0	4,6,20	4,8,8	160	86	5.96328e-06	7.64038e-05	0.879,0.952,1.0	0.35,0.287,0.573	0.54
ENSG00000177082	WDR73	15	-	85191120	85191856	85191120	85191185	85191767	85191856	4,5,5	2,1,1	2,0,0	5,11,5	140	54	0.0001075	0.00100712	0.435,0.659,0.659	0.134,0.0,0.0	0.54
ENSG00000145431	PDGFC	4	-	157688924	157689142	157688924	157689028	157689113	157689142	21,28,19	0,0,1	14,15,17	4,8,5	92	22	0.000265769	0.00225904	1.0,1.0,0.82	0.456,0.31,0.448	0.535
ENSG00000057608	GDI2	10	-	5808203	5808601	5808203	5808258	5808456	5808601	30,19,26	5,3,7	4,1,7	16,14,8	134	48	5.52661e-09	1.21255e-07	0.682,0.694,0.571	0.082,0.025,0.239	0.534
ENSG00000111665	CDCA3	12	-	6958486	6959022	6958486	6958577	6958728	6959022	16,16,23	2,0,0	22,18,19	16,11,18	170	84	2.00173e-06	2.91957e-05	0.798,1.0,1.0	0.405,0.447,0.343	0.534
ENSG00000149136	SSRP1	11	-	57097764	57098401	57097764	57097903	57098328	57098401	56,72,40	13,11,13	5,8,8	14,28,24	152	66	9.99201e-16	4.66354e-14	0.652,0.74,0.572	0.134,0.11,0.126	0.531
ENSG00000144354	CDCA7	2	+	174228545	174229717	174228545	174228623	174229522	174229717	5,7,1	0,1,1	1,2,3	13,3,5	157	71	0.00917437	0.048759	1.0,0.76,0.311	0.034,0.232,0.213	0.531
ENSG00000008710	PKD1	16	-	2147728	2147985	2147728	2147781	2147868	2147985	6,10,5	4,1,2	1,2,0	17,19,15	120	46	3.11227e-07	5.29086e-06	0.365,0.793,0.489	0.022,0.039,0.0	0.529
ENSG00000165055	METTL2B	7	+	128116782	128117227	128116782	128116929	128117135	128117227	14,8,14	4,7,3	14,6,8	118126121	171	85	2.66454e-15	1.19998e-13	0.635,0.362,0.699	0.056,0.023,0.032	0.528
ENSG00000196465	MYL6B	12	+	56548596	56548982	56548596	56548624	56548838	56548982	12,11,12	3,1,2	0,0,1	6,4,2	107	21	6.20281e-05	0.000605423	0.44,0.683,0.541	0.0,0.0,0.089	0.525
ENSG00000103496	STX4	16	+	31051043	31051489	31051043	31051139	31051232	31051489	18,26,17	2,1,0	3,1,3	2,3,1	172	86	0.00335876	0.0208764	0.818,0.929,1.0	0.429,0.143,0.6	0.525
ENSG00000136718	IMP4	2	+	131103590	131103822	131103590	131103685	131103773	131103822	32,45,40	13,7,18	1,0,0	9,10,6	118	42	2.02522e-08	4.12599e-07	0.467,0.696,0.442	0.038,0.0,0.0	0.522
ENSG00000137965	IFI44	1	+	79120698	79121196	79120698	79120894	79121046	79121196	30,46,32	2,3,2	11,9,7	6,9,9	172	86	1.37913e-07	2.42481e-06	0.882,0.885,0.889	0.478,0.333,0.28	0.522
ENSG00000166598	HSP90B1	12	+	104336304	104337097	104336304	104336574	104336851	104337097	291411261	140123145	4,5,4	130134124	172	86	0	0	0.51,0.626,0.474	0.015,0.018,0.016	0.52
ENSG00000156599	ZDHHC5	11	+	57457502	57457909	57457502	57457675	57457806	57457909	139150109	7,1,3	9,16,7	7,5,9	172	86	1.09162e-10	3.04586e-09	0.908,0.987,0.948	0.391,0.615,0.28	0.519
ENSG00000082014	SMARCD3	7	-	150939222	150939689	150939222	150939318	150939550	150939689	40,44,38	10,14,14	2,6,5	11,30,17	172	86	1.82077e-14	7.53856e-13	0.667,0.611,0.576	0.083,0.091,0.128	0.517
ENSG00000142208	AKT1	14	-	105237081	105238789	105237081	105237184	105238701	105238789	9,15,5	3,4,4	0,0,2	11,20,13	167	81	1.89579e-08	3.92458e-07	0.593,0.645,0.377	0.0,0.0,0.069	0.515
ENSG00000165671	NSD1	5	+	176562087	176563031	176562087	176562201	176562941	176563031	16,11,12	1,1,2	2,5,1	5,1,8	169	83	0.00585002	0.0334454	0.887,0.844,0.747	0.164,0.711,0.058	0.515
ENSG00000068903	SIRT2	19	-	39380328	39380601	39380328	39380385	39380494	39380601	9,12,8	2,3,2	0,1,0	2,1,4	136	50	0.00866564	0.0467325	0.623,0.595,0.595	0.0,0.269,0.0	0.515
ENSG00000137312	FLOT1	6	-	30698458	30698877	30698458	30698504	30698695	30698877	44,56,31	1,2,3	2,9,4	3,2,3	125	39	0.000980346	0.00714928	0.932,0.897,0.763	0.172,0.584,0.294	0.514
ENSG00000060138	CSDA	12	-	10854558	10856747	10854558	10854733	10856658	10856747	115,114,89	30,32,12	12,2,11	12,12,34	168	82	3.77588e-10	9.69269e-09	0.652,0.635,0.784	0.328,0.075,0.136	0.511
ENSG00000184575	XPOT	12	+	64818817	64819237	64818817	64818918	64819117	64819237	22,25,16	0,5,4	12,12,15	15,21,14	172	86	1.44278e-05	0.000163877	1.0,0.714,0.667	0.286,0.222,0.349	0.508
ENSG00000174243	DDX23	12	-	49231063	49231440	49231063	49231176	49231306	49231440	2,3,2	1,1,1	1,0,0	6,15,6	172	86	0.000145875	0.00132788	0.5,0.6,0.5	0.077,0.0,0.0	0.508
ENSG00000149428	HYOU1	11	-	118926200	118926555	118926200	118926283	118926461	118926555	14,14,12	6,5,5	0,0,1	7,7,4	162	76	1.34358e-05	0.000156772	0.523,0.568,0.53	0.0,0.0,0.105	0.505
ENSG00000008710	PKD1	16	-	2141781	2142189	2141781	2141907	2142047	2142189	9,13,15	0,2,1	3,6,12	5,7,4	172	86	0.00526484	0.0305765	1.0,0.765,0.882	0.231,0.3,0.6	0.505
ENSG00000242372	EIF6	20	-	33871978	33872295	33871978	33872064	33872183	33872295	27,15,22	7,7,3	4,7,6	25,12,19	165	79	3.57201e-08	6.85027e-07	0.649,0.506,0.778	0.071,0.218,0.131	0.504
ENSG00000256872	NOL12	22	+	38087180	38089483	38087180	38087431	38089338	38089483	119129134	15,15,18	37,49,60	60,66,48	172	86	0	0	0.799,0.811,0.788	0.236,0.271,0.385	0.502
ENSG00000181789	COPG1	3	+	128971465	128971798	128971465	128971537	128971718	128971798	5,5,4	1,5,1	1,0,0	12,8,13	138	52	2.78738e-05	0.000294453	0.653,0.274,0.601	0.03,0.0,0.0	0.499
ENSG00000131795	RBM8A	1	+	145508015	145508284	145508015	145508075	145508206	145508284	4,6,4	2,0,5	0,1,2	10,10,12	124	38	0.00329935	0.0206571	0.38,1.0,0.197	0.0,0.03,0.049	0.499
ENSG00000122952	ZWINT	10	-	58119778	58120144	58119778	58119902	58120053	58120144	6,8,7	3,1,2	6,2,5	11,11,15	170	84	0.000192154	0.00169505	0.497,0.798,0.634	0.212,0.082,0.141	0.498
ENSG00000101199	ARFGAP1	20	+	61918915	61921140	61918915	61920848	61921029	61921140	7,7,9	1,5,3	7,9,8	34,41,32	172	86	2.31872e-06	3.30675e-05	0.778,0.412,0.6	0.093,0.099,0.111	0.496
ENSG00000139620	KANSL2	12	-	49075164	49076008	49075164	49075424	49075969	49076008	402461355	97,73,70	23,32,15	74,60,64	118	32	0	0	0.529,0.631,0.579	0.078,0.126,0.06	0.492
ENSG00000123066	MED13L	12	-	116412975	116413543	116412975	116413118	116413319	116413543	95,99,116	30,41,54	6,8,4	62,28,61	172	86	0	0	0.613,0.547,0.518	0.046,0.125,0.032	0.492
ENSG00000173113	TRMT112	11	-	64084162	64084619	64084162	64084440	64084529	64084619	20,23,17	10,7,6	1,2,2	8,8,12	161	83	4.97052e-07	8.17905e-06	0.508,0.629,0.594	0.061,0.114,0.079	0.492
ENSG00000134222	PSRC1	1	-	109823398	109823873	109823398	109823538	109823729	109823873	15,7,9	0,1,2	12,10,7	11,7,12	172	86	0.000994868	0.00723464	1.0,0.778,0.692	0.353,0.417,0.226	0.491
ENSG00000138750	NUP54	4	-	77038816	77039347	77038816	77038927	77039227	77039347	21,30,26	2,0,3	2,9,6	3,3,6	172	86	0.000748843	0.00572866	0.84,1.0,0.813	0.25,0.6,0.333	0.49
ENSG00000130717	UCK1	9	-	134404330	134404657	134404330	134404425	134404514	134404657	11,13,32	1,0,0	6,5,1	3,1,3	164	86	0.00448191	0.0265715	0.852,1.0,1.0	0.512,0.724,0.149	0.489
ENSG00000023191	RNH1	11	-	499014	499999	499014	499185	499828	499999	14,10,7	5,1,2	1,2,4	5,3,6	172	86	0.00424964	0.0253105	0.583,0.833,0.636	0.091,0.25,0.25	0.487
ENSG00000136699	SMPD4	2	-	130913607	130914248	130913607	130913708	130914157	130914248	53,55,63	3,3,1	9,10,2	6,4,2	170	84	3.31713e-06	4.50533e-05	0.897,0.901,0.969	0.426,0.553,0.331	0.486
ENSG00000155366	RHOC	1	-	113245184	113245741	113245184	113245315	113245620	113245741	195187171	67,61,76	22,21,12	87,79,101	172	86	0	0	0.593,0.605,0.529	0.112,0.117,0.056	0.481
ENSG00000011485	PPP5C	19	+	46893307	46894103	46893307	46893389	46893540	46894103	18,22,23	0,2,2	12,5,7	6,3,7	161	75	0.000226713	0.00196613	1.0,0.837,0.843	0.482,0.437,0.318	0.481
ENSG00000170291	C17orf81	17	+	7161906	7163250	7161906	7162002	7162889	7163250	5,10,4	1,1,4	2,4,3	18,11,5	172	86	0.00153962	0.0105392	0.714,0.833,0.333	0.053,0.154,0.231	0.481
ENSG00000198563	DDX39B	6	-	31500556	31503262	31500556	31500688	31503143	31503262	63,58,45	10,8,11	17,22,17	31,25,25	172	86	5.90639e-14	2.33257e-12	0.759,0.784,0.672	0.215,0.306,0.254	0.48
ENSG00000103549	RNF40	16	+	30780506	30780921	30780506	30780719	30780795	30780921	180169142	3,3,5	2,5,7	2,2,5	138	86	3.71442e-09	8.29124e-08	0.974,0.972,0.947	0.384,0.609,0.466	0.478
ENSG00000075711	DLG1	3	-	196792146	196792680	196792146	196792319	196792578	196792680	23,20,22	9,7,4	1,2,3	5,4,8	172	86	0.000169199	0.0015081	0.561,0.588,0.733	0.091,0.2,0.158	0.478
ENSG00000175634	RPS6KB2	11	+	67200596	67200918	67200596	67200687	67200810	67200918	14,11,17	3,2,6	2,4,0	3,4,8	170	84	0.00166867	0.011362	0.698,0.731,0.583	0.248,0.331,0.0	0.478
ENSG00000165792	METTL17	14	+	21462958	21463392	21462958	21463060	21463323	21463392	19,15,19	2,2,4	4,1,7	6,5,3	148	62	0.00309668	0.0195312	0.799,0.759,0.666	0.218,0.077,0.494	0.478
ENSG00000157538	DSCR3	21	-	38595720	38600107	38595720	38597927	38599954	38600107	26,21,17	2,1,1	3,6,4	2,3,4	172	86	0.000788789	0.00595536	0.867,0.913,0.895	0.429,0.5,0.333	0.471
ENSG00000178719	GRINA	8	+	145065859	145066541	145065859	145065972	145066045	145066541	48,78,58	16,4,12	12,13,17	20,30,14	132	86	3.12875e-08	6.17807e-07	0.662,0.927,0.759	0.281,0.22,0.442	0.468
ENSG00000089693	MLF2	12	-	6859342	6859932	6859342	6859471	6859878	6859932	55,57,56	12,8,8	19,11,4	18,10,14	133	47	2.71428e-08	5.40121e-07	0.618,0.716,0.712	0.272,0.28,0.092	0.467
ENSG00000132424	PNISR	6	-	99862447	99864304	99862447	99862566	99864224	99864304	13,14,12	0,1,1	5,8,7	7,3,3	159	73	0.00421929	0.0253059	1.0,0.865,0.846	0.247,0.55,0.517	0.466
ENSG00000156976	EIF4A2	3	+	186502352	186503840	186502352	186502485	186503671	186503840	9,9,11	4,1,7	1,3,1	6,7,3	172	86	0.00690576	0.0385371	0.529,0.818,0.44	0.077,0.176,0.143	0.464
ENSG00000136271	DDX56	7	-	44613181	44613524	44613181	44613343	44613434	44613524	445477360	9,8,5	32,24,17	13,12,10	165	83	0	0	0.961,0.968,0.973	0.553,0.502,0.461	0.462
ENSG00000196498	NCOR2	12	-	124818969	124819826	124818969	124819163	124819680	124819826	60,46,57	2,0,1	10,9,6	5,2,6	172	86	2.00024e-06	2.91957e-05	0.938,1.0,0.966	0.5,0.692,0.333	0.46
ENSG00000164611	PTTG1	5	+	159849308	159849900	159849308	159849410	159849715	159849900	29,32,42	13,3,6	11,8,15	17,19,14	172	86	8.77581e-06	0.000107787	0.527,0.842,0.778	0.244,0.174,0.349	0.46
ENSG00000113758	DBN1	5	-	176894481	176894818	176894481	176894628	176894743	176894818	33,43,40	6,3,5	12,9,8	5,12,13	154	68	1.4331e-05	0.000163501	0.708,0.864,0.779	0.515,0.249,0.214	0.458
ENSG00000107175	CREB3	9	+	35732992	35733279	35732992	35733140	35733211	35733279	22,27,15	1,5,5	3,3,2	12,1,5	103	61	0.00264888	0.0170418	0.929,0.762,0.64	0.129,0.64,0.192	0.457
ENSG00000234741	GAS5	1	-	173833394	173834420	173833394	173833842	173834366	173834420	15,9,9	0,1,1	5,10,6	2,7,4	133	47	0.00794811	0.0435957	1.0,0.761,0.761	0.469,0.335,0.346	0.457
ENSG00000174775	HRAS	11	-	532241	532755	532241	532522	532630	532755	24,21,9	3,4,2	5,4,3	6,7,3	172	86	0.000228666	0.00197638	0.8,0.724,0.692	0.294,0.222,0.333	0.456
ENSG00000172354	GNB2	7	+	100275120	100275441	100275120	100275283	100275374	100275441	47,55,38	20,16,16	2,7,0	10,17,19	142	60	4.66516e-11	1.36085e-09	0.498,0.592,0.501	0.078,0.148,0.0	0.455
ENSG00000022277	C20orf43	20	+	55091990	55092257	55091990	55092045	55092161	55092257	131103109	13,20,21	24,19,28	33,18,32	134	48	3.10862e-15	1.37583e-13	0.783,0.648,0.65	0.207,0.274,0.239	0.454
ENSG00000100823	APEX1	14	+	20923384	20923862	20923384	20923548	20923736	20923862	38,33,23	11,8,2	5,17,11	13,19,11	172	86	1.33592e-05	0.000156589	0.633,0.673,0.852	0.161,0.309,0.333	0.452
ENSG00000115234	SNX17	2	+	27597555	27598020	27597555	27597625	27597927	27598020	18,26,16	3,4,2	11,6,9	8,12,8	149	63	4.61035e-05	0.000460497	0.717,0.733,0.772	0.368,0.175,0.322	0.452
ENSG00000105135	ILVBL	19	-	15227218	15228826	15227218	15227333	15228691	15228826	10,21,14	5,6,3	2,7,6	25,9,14	172	86	3.897e-06	5.18321e-05	0.5,0.636,0.7	0.038,0.28,0.176	0.447
ENSG00000213619	NDUFS3	11	+	47602076	47602536	47602076	47602174	47602386	47602536	11,25,13	6,9,9	1,2,0	16,8,12	172	86	7.9388e-08	1.43778e-06	0.478,0.581,0.419	0.03,0.111,0.0	0.446
ENSG00000125733	TRIP10	19	+	6750302	6750644	6750302	6750442	6750522	6750644	43,48,26	8,14,5	7,6,2	3,18,10	146	86	0.000348222	0.00285586	0.76,0.669,0.754	0.579,0.164,0.105	0.445
ENSG00000161513	FDXR	17	-	72860017	72860469	72860017	72860189	72860269	72860469	100,84,73	1,3,0	13,17,2	4,4,4	146	86	6.08669e-06	7.69681e-05	0.983,0.943,1.0	0.657,0.715,0.228	0.442
ENSG00000101391	CDK5RAP1	20	-	31946646	31948297	31946646	31946929	31948156	31948297	32,26,20	2,1,1	4,4,1	1,3,1	172	86	0.00535806	0.0308889	0.889,0.929,0.909	0.667,0.4,0.333	0.442
ENSG00000175634	RPS6KB2	11	+	67201465	67201746	67201465	67201528	67201668	67201746	35,51,40	5,7,5	6,2,7	5,2,6	127	41	0.000231693	0.00199582	0.693,0.702,0.721	0.279,0.244,0.274	0.44
ENSG00000138073	PREB	2	-	27354539	27354950	27354539	27354699	27354877	27354950	46,47,36	1,4,2	8,16,10	10,4,5	152	66	7.05048e-05	0.000680398	0.952,0.836,0.887	0.258,0.635,0.465	0.439
ENSG00000182272	B4GALNT4	11	+	375638	375956	375638	375773	375846	375956	42,41,40	20,18,17	26,24,22	88,83,83	132	86	0	0	0.578,0.597,0.605	0.161,0.159,0.147	0.438
ENSG00000101365	IDH3B	20	-	2640344	2640822	2640344	2640439	2640713	2640822	29,42,34	7,4,4	20,10,17	12,13,22	172	86	1.43266e-06	2.13816e-05	0.674,0.84,0.81	0.455,0.278,0.279	0.437
ENSG00000144591	GMPPA	2	+	220366197	220366759	220366197	220366301	220366572	220366759	6,4,7	2,4,3	1,1,0	4,9,6	172	86	0.00148036	0.0102153	0.6,0.333,0.538	0.111,0.053,0.0	0.436
ENSG00000166987	MBD6	12	+	57917811	57918199	57917811	57917875	57918062	57918199	139130154	0,2,1	28,13,10	9,7,2	143	57	1.14249e-11	3.71236e-10	1.0,0.963,0.984	0.554,0.425,0.666	0.434
ENSG00000165280	VCP	9	-	35060309	35060920	35060309	35060522	35060797	35060920	289325218	28,21,37	10,22,12	7,12,15	172	86	4.86828e-10	1.22518e-08	0.838,0.886,0.747	0.417,0.478,0.286	0.43
ENSG00000076604	TRAF4	17	+	27074860	27075196	27074860	27074965	27075034	27075196	21,25,14	7,7,9	2,2,4	6,6,8	124	86	0.000535937	0.00424614	0.675,0.712,0.519	0.188,0.188,0.257	0.424
ENSG00000048740	CELF2	10	+	11370888	11374591	11370888	11371060	11372418	11374591	47,42,49	1,2,0	10,6,7	2,4,4	172	86	3.01143e-05	0.000314242	0.959,0.913,1.0	0.714,0.429,0.467	0.421
ENSG00000101365	IDH3B	20	-	2640344	2640822	2640344	2640439	2640675	2640822	27,38,33	4,4,4	11,6,6	7,5,6	172	86	6.02291e-05	0.000590107	0.771,0.826,0.805	0.44,0.375,0.333	0.418
ENSG00000072682	P4HA2	5	-	131552889	131553541	131552889	131553041	131553444	131553541	25,31,28	12,13,13	1,1,4	7,8,8	172	86	4.25393e-05	0.000428229	0.51,0.544,0.519	0.067,0.059,0.2	0.416
ENSG00000070047	PHRF1	11	+	581491	582081	581491	581606	581961	582081	79,95,95	1,0,0	1,8,4	1,0,3	172	86	0.00036835	0.00300176	0.975,1.0,1.0	0.333,1.0,0.4	0.414
ENSG00000178035	IMPDH2	3	-	49061757	49062235	49061757	49061837	49061927	49062235	6,3,3	6,2,1	1,0,0	5,8,5	153	73	0.00479153	0.0282107	0.323,0.417,0.589	0.087,0.0,0.0	0.414
ENSG00000167770	OTUB1	11	+	63764001	63764413	63764001	63764120	63764328	63764413	9,4,9	1,4,3	4,2,3	8,9,6	164	78	0.00937818	0.0496367	0.811,0.322,0.588	0.192,0.096,0.192	0.414
ENSG00000198930	CSAG1	X	+	151908777	151909518	151908777	151908928	151909138	151909518	142161159	2,1,0	6,11,11	4,3,3	172	86	7.38402e-10	1.80522e-08	0.973,0.988,1.0	0.429,0.647,0.647	0.413
ENSG00000164405	UQCRQ	5	+	132202560	132203379	132202560	132202727	132203179	132203379	298277219	12,16,16	36,31,45	15,19,26	172	86	0	0	0.925,0.896,0.873	0.545,0.449,0.464	0.412
ENSG00000153914	SREK1	5	+	65458241	65459750	65458241	65458420	65459619	65459750	115147122	1,3,6	14,10,13	4,7,5	172	86	2.99024e-09	6.79287e-08	0.983,0.961,0.91	0.636,0.417,0.565	0.412
ENSG00000185787	MORF4L1	15	+	79183330	79183914	79183330	79183356	79183825	79183914	13,4,6	1,4,1	0,1,0	11,6,7	101	15	3.47631e-05	0.000352715	0.659,0.129,0.471	0.0,0.024,0.0	0.412
ENSG00000154222	CC2D1B	1	-	52823452	52824133	52823452	52823588	52824002	52824133	45,35,49	0,0,2	13,18,8	6,6,3	172	86	1.11162e-06	1.69853e-05	1.0,1.0,0.925	0.52,0.6,0.571	0.411
ENSG00000110321	EIF4G2	11	-	10825026	10825597	10825026	10825137	10825445	10825597	229269203	41,43,31	63,36,21	36,33,39	172	86	2.24857e-11	6.95431e-10	0.736,0.758,0.766	0.467,0.353,0.212	0.409
ENSG00000144591	GMPPA	2	+	220370179	220370483	220370179	220370277	220370416	220370483	4,9,4	2,5,2	1,1,0	10,6,6	146	60	0.000211963	0.00185703	0.451,0.425,0.451	0.039,0.064,0.0	0.408
ENSG00000185000	DGAT1	8	-	145541923	145542229	145541923	145542025	145542123	145542229	22,9,19	1,1,1	9,4,15	4,5,5	172	86	0.00484313	0.0283881	0.917,0.818,0.905	0.529,0.286,0.6	0.408
ENSG00000102103	PQBP1	X	+	48759509	48760361	48759509	48760072	48760204	48760361	45,34,27	0,2,6	9,6,11	5,5,5	172	86	0.000414277	0.00334418	1.0,0.895,0.692	0.474,0.375,0.524	0.405
ENSG00000204843	DCTN1	2	-	74592201	74592784	74592201	74592368	74592641	74592784	7,5,4	4,3,3	0,0,1	6,5,4	172	86	0.00302898	0.0191985	0.467,0.455,0.4	0.0,0.0,0.111	0.404
ENSG00000160072	ATAD3B	1	+	1421161	1421615	1421161	1421218	1421489	1421615	39,37,52	2,0,3	2,1,4	2,1,0	136	50	0.00853788	0.0463179	0.878,1.0,0.864	0.269,0.269,1.0	0.401
ENSG00000178921	PFAS	17	+	8159584	8159966	8159584	8159725	8159841	8159966	49,65,53	43,41,31	9,3,9	165152138	172	86	0	0	0.363,0.442,0.461	0.027,0.01,0.032	0.399
ENSG00000185686	PRAME	22	-	22899231	22900000	22899231	22899329	22899964	22900000	24,31,25	4,6,5	12,14,10	16,11,17	115	29	3.71992e-07	6.28226e-06	0.602,0.566,0.558	0.159,0.243,0.129	0.398
ENSG00000161013	MGAT4B	5	-	179226505	179227068	179226505	179226636	179226953	179227068	37,31,29	3,1,6	9,12,5	4,9,4	172	86	0.000411393	0.00333137	0.86,0.939,0.707	0.529,0.4,0.385	0.397
ENSG00000198912	C1orf174	1	-	3807132	3809560	3807132	3807621	3809446	3809560	52,65,70	2,0,3	6,6,3	4,0,5	172	86	0.000907666	0.00669534	0.929,1.0,0.921	0.429,1.0,0.231	0.397
ENSG00000096080	MRPS18A	6	-	43642938	43643354	43642938	43643008	43643230	43643354	68,62,60	1,1,0	8,16,14	2,5,5	149	63	4.4758e-07	7.46064e-06	0.966,0.963,1.0	0.628,0.575,0.542	0.395
ENSG00000162298	SYVN1	11	-	64900392	64900791	64900392	64900545	64900630	64900791	106,99,84	5,4,6	5,1,3	4,3,0	156	86	0.0044901	0.0265715	0.921,0.932,0.885	0.408,0.155,1.0	0.392
ENSG00000077380	DYNC1I2	2	+	172582428	172582803	172582428	172582591	172582703	172582803	84,114,82	4,1,2	15,4,14	10,6,0	172	86	0.000732938	0.00565	0.913,0.983,0.953	0.429,0.25,1.0	0.39
ENSG00000168003	SLC3A2	11	+	62652648	62653080	62652648	62652829	62652936	62653080	100,98,91	20,35,23	12,13,16	32,11,22	172	86	1.69235e-08	3.53192e-07	0.714,0.583,0.664	0.158,0.371,0.267	0.388
ENSG00000160201	U2AF1	21	-	44520562	44524512	44520562	44520629	44524424	44524512	32,40,36	11,6,8	8,7,8	10,9,9	141	55	4.59389e-05	0.000460497	0.532,0.722,0.637	0.238,0.233,0.257	0.388
ENSG00000109113	RAB34	17	-	27042658	27042919	27042658	27042723	27042817	27042919	47,65,62	12,19,20	1,9,3	6,5,11	144	58	0.00068674	0.005342	0.612,0.579,0.555	0.063,0.42,0.099	0.388
ENSG00000173486	FKBP2	11	+	64010670	64010969	64010670	64010783	64010922	64010969	36,46,15	10,11,9	3,4,3	12,8,11	126	40	1.94685e-06	2.87216e-05	0.533,0.57,0.346	0.074,0.137,0.08	0.386
ENSG00000038274	MAT2B	5	+	162939007	162940675	162939007	162939202	162940560	162940675	66,45,44	4,3,4	10,11,12	6,8,4	172	86	1.27619e-05	0.000150275	0.892,0.882,0.846	0.455,0.407,0.6	0.386
ENSG00000100982	PCIF1	20	+	44575901	44576662	44575901	44576077	44576162	44576662	40,35,47	0,1,0	5,5,5	3,1,2	156	86	7.56815e-05	0.00072221	1.0,0.951,1.0	0.479,0.734,0.58	0.386
ENSG00000136279	DBNL	7	+	44097380	44097879	44097380	44097458	44097727	44097879	4,8,7	5,3,2	0,2,2	11,9,4	157	71	0.00205534	0.0137397	0.266,0.547,0.613	0.0,0.091,0.184	0.384
ENSG00000140416	TPM1	15	+	63353396	63354476	63353396	63353472	63354413	63354476	371358372	79,81,79	57,50,52	59,75,58	125	39	0	0	0.594,0.58,0.595	0.232,0.172,0.219	0.382
ENSG00000052749	RRP12	10	-	99130679	99131923	99130679	99130838	99131829	99131923	107,137,98	2,1,1	8,5,11	2,4,2	172	86	1.20354e-06	1.8281e-05	0.964,0.986,0.98	0.667,0.385,0.733	0.382
ENSG00000160948	VPS28	8	-	145650100	145651155	145650100	145650202	145650328	145651155	6,6,7	4,3,2	2,1,3	7,7,5	172	86	0.00677785	0.0379971	0.429,0.5,0.636	0.125,0.067,0.231	0.381
ENSG00000110321	EIF4G2	11	-	10825833	10826562	10825833	10825965	10826459	10826562	81,111,94	50,56,55	6,7,5	34,29,29	172	86	1.11022e-16	5.37725e-15	0.448,0.498,0.461	0.081,0.108,0.079	0.38
ENSG00000196642	C9orf86	9	+	139726172	139726822	139726172	139726313	139726716	139726822	25,23,23	0,1,0	4,4,5	3,1,1	172	86	0.0033894	0.0210159	1.0,0.92,1.0	0.4,0.667,0.714	0.38
ENSG00000075624	ACTB	7	-	5567634	5568350	5567634	5567816	5567911	5568350	960978716	645639548	54,52,45	553579535	172	86	0	0	0.427,0.434,0.395	0.047,0.043,0.04	0.375
ENSG00000105287	PRKD2	19	-	47219387	47220384	47219387	47219792	47220071	47220384	36,35,41	0,1,0	34,39,39	12,13,11	172	86	2.32165e-07	4.0268e-06	1.0,0.946,1.0	0.586,0.6,0.639	0.374
ENSG00000071462	WBSCR22	7	+	73106925	73107744	73106925	73106976	73107658	73107744	27,23,32	7,6,5	8,2,8	6,6,8	123	37	0.000846748	0.00631861	0.537,0.536,0.658	0.286,0.091,0.231	0.374
ENSG00000139613	SMARCC2	12	-	56574760	56575381	56574760	56574885	56575265	56575381	11,31,18	1,0,1	5,2,8	2,1,3	172	86	0.00493645	0.0288653	0.846,1.0,0.9	0.556,0.5,0.571	0.373
ENSG00000147140	NONO	X	+	70517685	70518358	70517685	70517788	70518318	70518358	13,13,8	3,8,2	2,5,2	7,10,7	119	33	0.000711793	0.00552016	0.546,0.311,0.526	0.073,0.122,0.073	0.372
ENSG00000137409	MTCH1	6	-	36938181	36938470	36938181	36938249	36938422	36938470	32,28,27	4,7,4	7,5,0	5,4,7	102	16	0.000287953	0.0024315	0.557,0.386,0.514	0.18,0.164,0.0	0.371
ENSG00000106263	EIF3B	7	+	2405951	2406226	2405951	2406083	2406159	2406226	3,11,3	2,7,3	1,0,1	5,13,10	112	60	0.000154004	0.001392	0.446,0.457,0.349	0.097,0.0,0.051	0.368
ENSG00000172638	EFEMP2	11	-	65637591	65638129	65637591	65637708	65638006	65638129	10,11,11	3,9,5	1,3,4	14,9,6	172	86	0.00111853	0.00799796	0.625,0.379,0.524	0.034,0.143,0.25	0.367
ENSG00000172590	MRPL52	14	+	23299095	23299319	23299095	23299149	23299261	23299319	93,84,75	12,26,16	2,2,4	21,20,19	98	12	0	0	0.487,0.283,0.365	0.012,0.012,0.025	0.362
ENSG00000185163	DDX51	12	-	132625375	132625965	132625375	132625565	132625819	132625965	35,31,35	17,27,22	12,9,11	62,75,61	172	86	0	0	0.507,0.365,0.443	0.088,0.057,0.083	0.362
ENSG00000087088	BAX	19	+	49464066	49465055	49464066	49464171	49464788	49465055	31,35,25	10,8,7	11,18,20	14,20,29	172	86	4.34944e-07	7.2974e-06	0.608,0.686,0.641	0.282,0.31,0.256	0.362
ENSG00000127054	CPSF3L	1	-	1247972	1248504	1247972	1248329	1248414	1248504	44,49,35	0,2,1	11,18,24	5,5,9	153	83	2.81317e-06	3.88248e-05	1.0,0.93,0.95	0.544,0.661,0.591	0.361
ENSG00000184702	2017-09-05	22	+	19709344	19709862	19709344	19709480	19709759	19709862	53,63,60	1,0,0	8,18,15	3,6,3	172	86	8.16811e-07	1.27851e-05	0.964,1.0,1.0	0.571,0.6,0.714	0.36
ENSG00000133895	MEN1	11	-	64573106	64573840	64573106	64573242	64573703	64573840	54,53,48	0,0,2	17,14,13	2,8,5	172	86	1.39916e-05	0.000161786	1.0,1.0,0.923	0.81,0.467,0.565	0.36
ENSG00000214078	CPNE1	20	-	34218360	34218956	34218360	34218412	34218822	34218956	164168172	14,4,10	30,25,25	10,12,6	131	45	8.97325e-08	1.61079e-06	0.801,0.935,0.855	0.508,0.417,0.589	0.359
ENSG00000166986	MARS	12	+	57905790	57906136	57905790	57905886	57906018	57906136	33,28,28	9,21,9	12,11,9	23,22,21	172	86	1.42555e-05	0.000163501	0.647,0.4,0.609	0.207,0.2,0.176	0.358
ENSG00000006744	ELAC2	17	-	12898080	12898379	12898080	12898201	12898279	12898379	31,43,33	3,0,3	14,8,10	4,8,4	142	86	0.000245058	0.00209688	0.862,1.0,0.869	0.679,0.377,0.602	0.358
ENSG00000131871	SELS	15	-	101814796	101815566	101814796	101814886	101815459	101815566	24,27,18	9,8,12	5,4,1	7,7,7	169	83	0.00253563	0.0163953	0.567,0.624,0.424	0.26,0.219,0.066	0.357
ENSG00000115207	GTF3C2	2	-	27558783	27559292	27558783	27558895	27559064	27559292	33,47,35	3,0,1	11,8,10	3,2,7	172	86	0.00021912	0.00190672	0.846,1.0,0.946	0.647,0.667,0.417	0.354
ENSG00000010322	NISCH	3	+	52511589	52512298	52511589	52511658	52512112	52512298	61,58,58	1,0,0	6,5,5	1,2,1	148	62	0.000198992	0.00174936	0.962,1.0,1.0	0.715,0.512,0.677	0.353
ENSG00000184840	TMED9	5	+	177020650	177021286	177020650	177020776	177021139	177021286	44,52,36	35,33,35	2,2,2	27,24,27	172	86	1.02252e-13	3.97697e-12	0.386,0.441,0.34	0.036,0.04,0.036	0.352
ENSG00000185163	DDX51	12	-	132626042	132626735	132626042	132626501	132626663	132626735	48,74,57	0,0,0	5,8,9	2,2,1	151	65	7.81818e-05	0.000743306	1.0,1.0,1.0	0.518,0.633,0.795	0.351
ENSG00000172932	ANKRD13D	11	+	67058946	67059217	67058946	67058992	67059073	67059217	16,17,14	9,6,14	2,1,0	6,9,10	101	39	0.000133069	0.00122433	0.407,0.522,0.279	0.114,0.041,0.0	0.351
ENSG00000166986	MARS	12	+	57883049	57883341	57883049	57883128	57883206	57883341	6,4,4	7,4,4	0,0,0	19,18,19	128	72	4.58409e-07	7.59185e-06	0.325,0.36,0.36	0.0,0.0,0.0	0.348
ENSG00000149532	CPSF7	11	-	61183137	61183991	61183137	61183256	61183576	61183991	17,24,25	8,11,7	12,9,7	17,23,13	172	86	1.17582e-05	0.000140084	0.515,0.522,0.641	0.261,0.164,0.212	0.347
ENSG00000105821	DNAJC2	7	-	102962957	102963241	102962957	102963079	102963149	102963241	10,13,10	3,4,6	6,4,4	6,10,8	125	85	0.00702735	0.0390459	0.694,0.688,0.531	0.405,0.214,0.254	0.347
ENSG00000213523	SRA1	5	-	139930645	139931769	139930645	139930754	139931566	139931769	24,58,46	5,1,2	10,15,10	6,5,5	172	86	0.000341691	0.00281129	0.706,0.967,0.92	0.455,0.6,0.5	0.346
ENSG00000073584	SMARCE1	17	-	38787843	38788619	38787843	38787945	38788446	38788619	11,9,4	8,5,7	2,0,0	12,11,18	172	86	1.55612e-05	0.000174434	0.407,0.474,0.222	0.077,0.0,0.0	0.342
ENSG00000204394	VARS	6	-	31749467	31749729	31749467	31749538	31749623	31749729	41,31,27	2,4,5	7,7,5	2,5,4	134	64	0.00509165	0.0297051	0.907,0.787,0.721	0.626,0.401,0.374	0.338
ENSG00000125450	NUP85	17	+	73230731	73231296	73230731	73230883	73231194	73231296	43,43,51	0,1,1	23,28,18	6,9,5	172	86	2.07842e-06	3.01429e-05	1.0,0.956,0.962	0.657,0.609,0.643	0.336
ENSG00000116774	OLFML3	1	+	114522953	114524876	114522953	114523239	114523570	114524876	31,39,48	6,14,4	19,11,12	9,12,12	172	86	0.00145403	0.0100607	0.721,0.582,0.857	0.514,0.314,0.333	0.333
ENSG00000135974	C2orf49	2	+	105959304	105959680	105959304	105959431	105959557	105959680	271292211	3,5,6	117108117	33,37,29	172	86	0	0	0.978,0.967,0.946	0.639,0.593,0.669	0.33
ENSG00000049656	CLPTM1L	5	-	1324877	1325931	1324877	1324928	1325865	1325931	68,60,47	11,16,17	10,16,21	27,37,38	103	17	5.00711e-14	2.0402e-12	0.505,0.382,0.313	0.058,0.067,0.084	0.33
ENSG00000174233	ADCY6	12	-	49167251	49167881	49167251	49167430	49167722	49167881	18,14,10	2,2,2	30,39,28	17,26,19	172	86	0.00127259	0.00897454	0.818,0.778,0.714	0.469,0.429,0.424	0.329
ENSG00000129347	KRI1	19	-	10675604	10676466	10675604	10675710	10676392	10676466	58,44,46	0,0,0	3,12,15	3,1,1	153	67	0.00332649	0.020726	1.0,1.0,1.0	0.305,0.84,0.868	0.329
ENSG00000088986	DYNLL1	12	+	120933915	120934356	120933915	120934019	120934218	120934356	29,24,21	25,26,22	0,2,2	76,74,77	172	86	0	0	0.367,0.316,0.323	0.0,0.013,0.013	0.327
ENSG00000021776	AQR	15	-	35166028	35167065	35166028	35166200	35166877	35167065	50,50,34	47,44,28	8,15,14	178185141	172	86	0	0	0.347,0.362,0.378	0.022,0.039,0.047	0.326
ENSG00000115234	SNX17	2	+	27596951	27597300	27596951	27597042	27597212	27597300	11,14,12	12,12,11	0,1,0	12,13,15	165	79	7.89585e-07	1.25892e-05	0.305,0.358,0.343	0.0,0.036,0.0	0.323
ENSG00000116670	MAD2L2	1	-	11740409	11740670	11740409	11740528	11740618	11740670	24,29,18	13,14,7	0,8,5	22,8,20	125	45	2.54052e-06	3.58325e-05	0.399,0.427,0.481	0.0,0.265,0.083	0.32
ENSG00000128567	PODXL	7	-	131193709	131194344	131193709	131193787	131194123	131194344	39,47,33	1,0,1	15,14,4	3,2,2	157	71	0.00274873	0.017596	0.946,1.0,0.937	0.693,0.76,0.475	0.318
ENSG00000161013	MGAT4B	5	-	179228333	179228694	179228333	179228467	179228553	179228694	38,31,30	3,2,2	7,11,5	5,5,1	158	86	0.00198623	0.0133473	0.873,0.894,0.891	0.432,0.545,0.731	0.317
ENSG00000081307	UBA5	3	+	132390620	132391021	132390620	132390725	132390893	132391021	41,45,40	7,5,14	7,7,3	8,4,2	172	86	0.00536675	0.0308889	0.745,0.818,0.588	0.304,0.467,0.429	0.317
ENSG00000204843	DCTN1	2	-	74595097	74596007	74595097	74595258	74595854	74596007	69,87,70	5,5,5	25,27,30	15,9,8	172	86	2.9269e-06	4.01783e-05	0.873,0.897,0.875	0.455,0.6,0.652	0.313
ENSG00000159352	PSMD4	1	+	151238479	151238915	151238479	151238588	151238783	151238915	25,27,22	10,10,11	8,11,3	10,13,12	172	86	0.000755438	0.00575433	0.556,0.574,0.5	0.286,0.297,0.111	0.312
ENSG00000239857	GET4	7	+	933376	933608	933376	933452	933535	933608	44,65,61	5,17,3	34,35,34	16,18,18	115	49	0.000291798	0.00244786	0.789,0.62,0.897	0.475,0.453,0.446	0.311
ENSG00000142541	RPL13A	19	+	49994296	49994804	49994296	49994356	49994681	49994804	42,50,20	22,21,13	6,11,7	19,23,33	139	53	1.22742e-09	2.97245e-08	0.421,0.476,0.37	0.107,0.154,0.075	0.31
ENSG00000144567	FAM134A	2	+	220045783	220046185	220045783	220045927	220046090	220046185	27,40,31	2,1,6	9,5,7	4,2,3	172	86	0.00706034	0.0391445	0.871,0.952,0.721	0.529,0.556,0.538	0.307
ENSG00000160201	U2AF1	21	-	44513065	44514673	44513065	44513359	44514580	44514673	49,42,54	5,4,5	19,24,12	6,11,7	172	86	0.00016368	0.00146912	0.831,0.84,0.844	0.613,0.522,0.462	0.306
ENSG00000204843	DCTN1	2	-	74593585	74594059	74593585	74593747	74593909	74594059	86,58,70	4,3,4	21,19,17	8,5,6	172	86	6.88422e-06	8.53709e-05	0.915,0.906,0.897	0.568,0.655,0.586	0.303
ENSG00000010256	UQCRC1	3	-	48638112	48638551	48638112	48638273	48638407	48638551	55,54,56	6,8,3	15,23,22	12,9,6	172	86	0.000475036	0.00378701	0.821,0.771,0.903	0.385,0.561,0.647	0.301
ENSG00000165801	ARHGEF40	14	+	21543490	21543924	21543490	21543658	21543803	21543924	22,38,19	0,0,1	11,12,7	2,1,5	172	86	0.00764819	0.0422213	1.0,1.0,0.905	0.733,0.857,0.412	0.301
ENSG00000214078	CPNE1	20	-	34220084	34220307	34220084	34220156	34220232	34220307	60,77,72	6,5,11	35,30,22	17,16,7	99	47	7.80797e-06	9.63608e-05	0.826,0.88,0.757	0.494,0.471,0.599	0.3
ENSG00000166986	MARS	12	+	57910027	57910438	57910027	57910120	57910217	57910438	18,10,17	15,11,13	7,2,2	28,26,25	172	86	3.57591e-08	6.85027e-07	0.375,0.313,0.395	0.111,0.037,0.038	0.299
ENSG00000182004	SNRPE	1	+	203830730	203831350	203830730	203830871	203831309	203831350	124131107	31,39,37	47,33,34	50,47,38	120	34	1.66867e-13	6.39323e-12	0.531,0.488,0.45	0.21,0.166,0.202	0.297
ENSG00000087077	TRIP6	7	+	100467991	100468365	100467991	100468085	100468195	100468365	49,68,60	21,18,21	27,18,19	24,37,19	172	86	3.8125e-06	5.09723e-05	0.538,0.654,0.588	0.36,0.196,0.333	0.297
ENSG00000163359	COL6A3	2	-	238250707	238253486	238250707	238250804	238252992	238253486	78,90,86	40,35,22	13,14,15	18,19,18	172	86	1.07282e-05	0.000129903	0.494,0.563,0.662	0.265,0.269,0.294	0.297
ENSG00000071655	MBD3	19	-	1576677	1578537	1576677	1578157	1578333	1578537	111,79,89	1,2,4	59,54,52	19,11,14	172	86	5.17949e-10	1.27844e-08	0.982,0.952,0.918	0.608,0.711,0.65	0.294
ENSG00000100258	LMF2	22	-	50943485	50943966	50943485	50943582	50943831	50943966	30,50,46	5,2,1	18,19,10	5,6,5	172	86	0.00133672	0.00937528	0.75,0.926,0.958	0.643,0.613,0.5	0.293
ENSG00000197102	DYNC1H1	14	+	102515776	102516219	102515776	102515919	102516050	102516219	71,58,55	17,23,26	10,11,10	10,17,12	172	86	0.000119649	0.00110481	0.676,0.558,0.514	0.333,0.244,0.294	0.292
ENSG00000103496	STX4	16	+	31050861	31051139	31050861	31050972	31051043	31051139	20,32,33	0,0,1	4,13,11	3,1,3	128	86	0.00535025	0.0308889	1.0,1.0,0.957	0.473,0.897,0.711	0.292
ENSG00000183258	DDX41	5	-	176939496	176939877	176939496	176939646	176939780	176939877	143143126	6,8,7	9,24,8	3,4,4	172	86	0.00016058	0.00144634	0.923,0.899,0.9	0.6,0.75,0.5	0.291
ENSG00000143575	HAX1	1	+	154247425	154247736	154247425	154247477	154247629	154247736	5,11,11	4,12,3	2,0,1	8,12,2	131	45	0.00308656	0.0195153	0.3,0.239,0.557	0.079,0.0,0.147	0.29
ENSG00000077152	UBE2T	1	-	202302137	202302463	202302137	202302221	202302364	202302463	6,5,9	6,7,6	3,1,1	22,15,14	163	77	3.03471e-05	0.000315388	0.321,0.252,0.415	0.061,0.031,0.033	0.288
ENSG00000233927	RPS28	19	+	8386539	8386975	8386539	8386587	8386836	8386975	32,24,23	23,24,10	1,5,2	15,19,23	127	41	5.8988e-08	1.08159e-06	0.31,0.244,0.426	0.021,0.078,0.027	0.285
ENSG00000166333	ILK	11	+	6629923	6630387	6629923	6630198	6630301	6630387	2,3,2	1,3,8	0,1,1	7,18,12	165	79	0.00898017	0.0481388	0.489,0.324,0.107	0.0,0.026,0.038	0.285
ENSG00000132463	GRSF1	4	-	71691012	71691962	71691012	71691148	71691840	71691962	165207208	1,0,3	14,20,14	3,2,5	172	86	1.38972e-08	2.94828e-07	0.988,1.0,0.972	0.7,0.833,0.583	0.281
ENSG00000149823	C11orf2	11	+	64875052	64875494	64875052	64875199	64875274	64875494	38,41,35	3,1,0	6,5,5	1,2,2	136	86	0.00221018	0.0145475	0.889,0.963,1.0	0.791,0.613,0.613	0.278
ENSG00000070778	PTPN21	14	-	88935842	88936394	88935842	88936077	88936265	88936394	78,110,74	2,3,2	12,13,11	4,3,2	172	86	3.43771e-05	0.000350182	0.951,0.948,0.949	0.6,0.684,0.733	0.277
ENSG00000184216	IRAK1	X	-	153284881	153285263	153284881	153285049	153285127	153285263	29,13,32	0,0,3	17,22,22	7,3,8	142	86	0.00484378	0.0283881	1.0,1.0,0.866	0.595,0.816,0.625	0.277
ENSG00000109332	UBE2D3	4	-	103722610	103723795	103722610	103722716	103723717	103723795	8,3,10	9,4,9	1,0,1	15,12,23	157	71	2.4331e-06	3.4507e-05	0.287,0.253,0.334	0.029,0.0,0.019	0.275
ENSG00000183258	DDX41	5	-	176940353	176940848	176940353	176940485	176940685	176940848	148163126	5,2,9	8,17,15	3,3,4	172	86	2.62485e-05	0.00028075	0.937,0.976,0.875	0.571,0.739,0.652	0.275
ENSG00000177595	PIDD	11	-	801444	802090	801444	801624	801964	802090	87,80,65	1,2,0	6,12,11	2,1,3	172	86	0.000145235	0.00132676	0.978,0.952,1.0	0.6,0.857,0.647	0.275
ENSG00000169045	HNRNPH1	5	-	179044799	179045061	179044799	179044933	179044989	179045061	12,23,14	25,18,21	2,7,2	23,24,20	77	65	0.00056685	0.00446351	0.288,0.519,0.36	0.068,0.198,0.078	0.274
ENSG00000101158	TH1L	20	+	57563968	57564695	57563968	57564076	57564542	57564695	12,20,10	7,10,7	5,6,5	11,11,13	172	86	0.00143185	0.00998792	0.462,0.5,0.417	0.185,0.214,0.161	0.273
ENSG00000148824	MTG1	10	+	135215652	135216277	135215652	135215749	135216195	135216277	7,7,7	3,9,9	1,3,3	16,12,12	161	75	0.00270952	0.0173884	0.521,0.266,0.266	0.028,0.104,0.104	0.272
ENSG00000160679	CHTOP	1	+	153609047	153610924	153609047	153609129	153610770	153610924	67,114,73	1,2,0	17,24,29	3,4,7	161	75	1.21773e-06	1.83877e-05	0.969,0.964,1.0	0.725,0.736,0.659	0.271
ENSG00000165782	TMEM55B	14	-	20926016	20927455	20926016	20926861	20927364	20927455	162159132	4,2,2	26,37,24	4,8,7	170	84	6.41058e-09	1.38285e-07	0.952,0.975,0.97	0.763,0.696,0.629	0.27
ENSG00000174233	ADCY6	12	-	49170886	49171304	49170886	49171014	49171192	49171304	85116102	1,3,5	62,74,61	15,19,13	172	86	2.23945e-09	5.27401e-08	0.977,0.951,0.911	0.674,0.661,0.701	0.268
ENSG00000071082	RPL31	2	+	101618754	101619270	101618754	101618777	101619163	101619270	27,26,20	7,15,4	4,3,0	3,8,8	102	16	0.000682274	0.00532339	0.377,0.214,0.44	0.173,0.056,0.0	0.267
ENSG00000204256	BRD2	6	+	32944338	32945347	32944338	32944713	32945036	32945347	37,48,47	23,34,39	5,2,8	13,14,15	172	86	0.000213801	0.00186676	0.446,0.414,0.376	0.161,0.067,0.211	0.266
ENSG00000106624	AEBP1	7	+	44151105	44151649	44151105	44151229	44151452	44151649	41,33,24	16,13,19	4,7,12	9,11,15	172	86	0.00332434	0.020726	0.562,0.559,0.387	0.182,0.241,0.286	0.266
ENSG00000165280	VCP	9	-	35061999	35062347	35061999	35062135	35062213	35062347	127156150	22,28,25	31,36,38	26,16,19	142	86	1.29199e-06	1.93949e-05	0.778,0.771,0.784	0.419,0.577,0.548	0.263
ENSG00000152291	TGOLN2	2	-	85553630	85554808	85553630	85553927	85554101	85554808	22,23,16	18,11,15	10,11,13	37,28,31	172	86	1.64413e-05	0.000182705	0.379,0.511,0.348	0.119,0.164,0.173	0.261
ENSG00000130305	NSUN5	7	-	72721579	72722550	72721579	72721754	72722427	72722550	50,53,61	0,1,1	20,17,20	4,2,6	172	86	7.25302e-05	0.000697323	1.0,0.964,0.968	0.714,0.81,0.625	0.261
ENSG00000122545	2017-09-07	7	+	35937857	35942825	35937857	35937993	35942685	35942825	59,78,87	15,22,12	40,41,47	31,22,31	172	86	1.42876e-05	0.000163501	0.663,0.639,0.784	0.392,0.482,0.431	0.26
ENSG00000115307	AUP1	2	-	74754067	74754490	74754067	74754186	74754374	74754490	5,6,9	4,9,12	1,0,3	19,13,13	172	86	0.000304549	0.00254651	0.385,0.25,0.273	0.026,0.0,0.103	0.26
ENSG00000175197	DDIT3	12	-	57911051	57911536	57911051	57911207	57911488	57911536	42,45,41	23,36,34	5,5,4	32,29,20	127	41	5.05408e-11	1.45773e-09	0.371,0.288,0.28	0.048,0.053,0.061	0.259
ENSG00000111229	ARPC3	12	-	110873914	110874488	110873914	110874034	110874361	110874488	35,48,45	0,0,0	9,10,2	7,1,0	172	86	0.00108011	0.00774478	1.0,1.0,1.0	0.391,0.833,1.0	0.259
ENSG00000162298	SYVN1	11	-	64898744	64899067	64898744	64898844	64898940	64899067	97105103	1,0,2	8,11,12	2,3,1	172	86	2.65401e-05	0.000281523	0.98,1.0,0.963	0.667,0.647,0.857	0.257
ENSG00000158850	B4GALT3	1	-	161143394	161143839	161143394	161143517	161143648	161143839	61,58,47	1,0,0	11,10,14	1,2,4	172	86	0.000167326	0.0014966	0.968,1.0,1.0	0.846,0.714,0.636	0.257
ENSG00000125826	RBCK1	20	+	409134	409738	409134	409233	409594	409738	48,36,44	0,2,0	27,30,28	8,3,7	172	86	0.000289915	0.00244004	1.0,0.9,1.0	0.628,0.833,0.667	0.257
ENSG00000047410	TPR	1	-	186310383	186312605	186310383	186310521	186312457	186312605	50,53,65	75,72,91	4,3,5	337298318	172	86	0	0	0.25,0.269,0.263	0.006,0.005,0.008	0.254
ENSG00000166165	CKB	14	-	103988359	103988842	103988359	103988514	103988637	103988842	5,5,9	5,12,5	2,2,4	23,22,13	172	86	0.00087616	0.00651914	0.333,0.172,0.474	0.042,0.043,0.133	0.254
ENSG00000160613	PCSK7	11	-	117093923	117094932	117093923	117094024	117094793	117094932	41,50,30	60,42,34	7,10,3	58,50,55	172	86	3.12084e-13	1.16104e-11	0.255,0.373,0.306	0.057,0.091,0.027	0.253
ENSG00000228474	OST4	2	-	27294193	27294517	27294193	27294331	27294468	27294517	276276217	73,77,54	82,72,80	76,44,63	128	42	4.46732e-12	1.52901e-10	0.554,0.54,0.569	0.261,0.349,0.294	0.253
ENSG00000165637	VDAC2	10	+	76978820	76979114	76978820	76978973	76979061	76979114	17,28,33	14,23,18	3,3,3	8,14,13	122	46	0.000113753	0.00105798	0.314,0.315,0.409	0.124,0.075,0.08	0.253
ENSG00000175550	DRAP1	11	+	65687250	65687512	65687250	65687323	65687418	65687512	118162129	78,95,71	50,30,20	68,74,68	152	66	7.61868e-12	2.53989e-10	0.396,0.425,0.441	0.242,0.15,0.113	0.252
ENSG00000136699	SMPD4	2	-	130911849	130912832	130911849	130912055	130912668	130912832	75,90,78	2,4,1	10,11,12	3,2,2	172	86	0.000361271	0.00295345	0.949,0.918,0.975	0.625,0.733,0.75	0.245
ENSG00000215021	PHB2	12	-	7079358	7079808	7079358	7079443	7079579	7079808	17,18,14	22,27,19	0,2,0	22,25,25	164	78	8.34245e-09	1.78459e-07	0.269,0.241,0.26	0.0,0.037,0.0	0.244
ENSG00000197728	RPS26	12	+	56436208	56437277	56436208	56436386	56437146	56437277	49,61,37	21,33,21	13,25,21	30,32,25	172	86	2.192e-05	0.000241496	0.538,0.48,0.468	0.178,0.281,0.296	0.244
ENSG00000146830	GIGYF1	7	-	100283596	100284056	100283596	100283702	100283802	100284056	63,59,51	2,1,1	25,29,30	5,5,7	172	86	6.75447e-05	0.000654291	0.94,0.967,0.962	0.714,0.744,0.682	0.243
ENSG00000100823	APEX1	14	+	20923384	20923862	20923384	20923487	20923736	20923862	41,43,28	4,6,10	32,41,27	20,15,16	172	86	0.00692832	0.0385792	0.837,0.782,0.583	0.444,0.577,0.458	0.241
ENSG00000162298	SYVN1	11	-	64899718	64900251	64899718	64899822	64900202	64900251	103,97,95	0,0,0	18,8,13	2,1,1	128	42	0.00015029	0.00136323	1.0,1.0,1.0	0.747,0.724,0.81	0.24
ENSG00000138385	SSB	2	+	170664986	170665412	170664986	170665063	170665369	170665412	24,28,43	8,10,7	8,10,6	7,6,9	106	20	0.00668886	0.037737	0.361,0.346,0.537	0.177,0.239,0.112	0.239
ENSG00000092199	HNRNPC	14	-	21677294	21679725	21677294	21679465	21679564	21679725	73,50,52	69,78,74	12,4,3	63,61,58	172	86	4.44089e-15	1.93216e-13	0.346,0.243,0.26	0.087,0.032,0.025	0.235
ENSG00000215021	PHB2	12	-	7076838	7077184	7076838	7076942	7077054	7077184	25,21,28	35,37,40	3,4,1	100,87,62	172	86	0	0	0.263,0.221,0.259	0.015,0.022,0.008	0.233
ENSG00000147403	RPL10	X	+	153627678	153627935	153627678	153627737	153627827	153627935	75,82,45	67,81,45	11,7,10	57,54,65	132	52	1.11022e-16	5.37725e-15	0.306,0.285,0.283	0.071,0.049,0.057	0.232
ENSG00000075415	SLC25A3	12	+	98987402	98987913	98987402	98987518	98987752	98987913	16,18,13	24,18,19	4,2,2	27,22,29	172	86	8.12896e-07	1.27851e-05	0.25,0.333,0.255	0.069,0.043,0.033	0.231
ENSG00000104522	TSTA3	8	-	144694787	144695465	144694787	144695135	144695365	144695465	117126105	4,1,3	17,26,21	6,3,3	172	86	3.35977e-05	0.000344981	0.936,0.984,0.946	0.586,0.813,0.778	0.23
ENSG00000106263	EIF3B	7	+	2418323	2418877	2418323	2418401	2418768	2418877	35,31,36	35,33,25	13,15,14	45,62,55	157	71	2.70116e-09	6.30354e-08	0.311,0.298,0.394	0.116,0.099,0.103	0.228
ENSG00000100823	APEX1	14	+	20923736	20924260	20923736	20923862	20924072	20924260	8,15,10	10,8,14	6,5,6	29,20,18	172	86	0.000972031	0.00710884	0.286,0.484,0.263	0.094,0.111,0.143	0.228
ENSG00000172262	ZNF131	5	+	43161350	43162033	43161350	43161715	43161810	43162033	12,8,6	14,11,12	1,2,0	26,13,22	172	86	6.07142e-06	7.69681e-05	0.3,0.267,0.2	0.019,0.071,0.0	0.226
ENSG00000154134	ROBO3	11	+	124748479	124749237	124748479	124748692	124749085	124749237	27,32,18	0,0,1	23,30,23	3,11,2	172	86	0.00916675	0.048759	1.0,1.0,0.9	0.793,0.577,0.852	0.226
ENSG00000127837	AAMP	2	-	219130301	219130669	219130301	219130405	219130553	219130669	8,2,3	7,3,7	1,1,1	10,12,12	172	86	0.0041898	0.0251879	0.364,0.25,0.176	0.048,0.04,0.04	0.221
ENSG00000140319	SRP14	15	-	40330482	40331149	40330482	40330595	40331076	40331149	74,85,69	109,109,95	3,3,6	76,89,87	152	66	0	0	0.228,0.253,0.24	0.017,0.014,0.029	0.22
ENSG00000135535	CD164	6	-	109687716	109690220	109687716	109689528	109690124	109690220	46,45,64	1,0,1	42,19,52	2,6,9	172	86	0.00152647	0.0105053	0.958,1.0,0.97	0.913,0.613,0.743	0.22
ENSG00000168268	NT5DC2	3	-	52561632	52561947	52561632	52561734	52561844	52561947	62,74,60	27,12,20	27,38,33	22,23,25	172	86	0.00213558	0.014129	0.534,0.755,0.6	0.38,0.452,0.398	0.22
ENSG00000136270	TBRG4	7	-	45148425	45148886	45148425	45148682	45148821	45148886	41,45,53	0,1,0	17,28,10	2,2,2	144	58	0.00909806	0.0486012	1.0,0.948,1.0	0.774,0.849,0.668	0.219
ENSG00000177954	RPS27	1	+	153963238	153963510	153963238	153963278	153963389	153963510	6,3,6	2,5,6	4,2,1	10,18,8	119	33	0.00424556	0.0253105	0.454,0.143,0.217	0.1,0.03,0.034	0.217
ENSG00000113013	HSPA9	5	-	137892462	137893185	137892462	137892555	137893090	137893185	317379323	603604530	51,48,44	165916211659	172	86	0	0	0.208,0.239,0.234	0.015,0.015,0.013	0.213
ENSG00000041357	PSMA4	15	+	78834518	78834987	78834518	78834561	78834824	78834987	8,2,1	4,2,2	1,0,1	8,12,5	122	36	0.00153336	0.0105245	0.371,0.228,0.129	0.036,0.0,0.056	0.212
ENSG00000137713	PPP2R1B	11	-	111612776	111613389	111612776	111612868	111613246	111613389	86,112,86	2,2,1	9,9,6	3,2,0	171	85	0.000714214	0.00552225	0.955,0.965,0.977	0.599,0.691,1.0	0.202
ENSG00000171914	TLN2	15	+	63045971	63047892	63045971	63046115	63047730	63047892	14,18,19	24,28,34	5,1,4	57,62,58	172	86	6.7818e-12	2.29064e-10	0.226,0.243,0.218	0.042,0.008,0.033	0.201
ENSG00000132424	PNISR	6	-	99851704	99852578	99851704	99851758	99852478	99852578	41,58,51	1,1,0	71,38,64	7,7,4	133	47	0.0094442	0.0497808	0.935,0.953,1.0	0.782,0.657,0.85	0.2
ENSG00000148926	ADM	11	+	10327226	10327645	10327226	10327345	10327495	10327645	28,25,21	45,44,44	0,1,4	29,42,44	172	86	3.50924e-10	9.09922e-09	0.237,0.221,0.193	0.0,0.012,0.043	0.199
ENSG00000182196	ARL6IP4	12	+	123466503	123467085	123466503	123466621	123467015	123467085	20,17,10	14,23,26	3,3,6	33,25,32	149	63	2.96923e-05	0.000312377	0.377,0.238,0.14	0.037,0.048,0.073	0.199
ENSG00000129347	KRI1	19	-	10670034	10670384	10670034	10670205	10670288	10670384	49,55,49	4,2,1	10,8,9	3,2,1	152	86	0.00677937	0.0379971	0.874,0.94,0.965	0.653,0.694,0.836	0.199
ENSG00000115286	NDUFS7	19	+	1388831	1391049	1388831	1388937	1390869	1391049	3,7,8	14,10,9	2,0,0	13,20,13	172	86	0.00125252	0.00885736	0.097,0.259,0.308	0.071,0.0,0.0	0.198
ENSG00000188846	RPL14	3	+	40502897	40503152	40502897	40502997	40503098	40503152	44,51,47	57,70,54	4,2,4	54,56,54	133	47	0	0	0.214,0.205,0.235	0.026,0.012,0.026	0.197
ENSG00000100462	PRMT5	14	-	23397334	23397824	23397334	23397420	23397705	23397824	1,6,5	3,7,7	1,1,2	17,18,22	165	79	0.000280443	0.0023759	0.138,0.291,0.255	0.027,0.026,0.042	0.196
ENSG00000147789	ZNF7	8	+	146054427	146054989	146054427	146054475	146054862	146054989	113123105	0,0,1	17,18,17	3,2,0	127	41	0.000543659	0.00429407	1.0,1.0,0.971	0.647,0.744,1.0	0.193
ENSG00000087460	GNAS	20	+	57484404	57484634	57484404	57484478	57484575	57484634	254203175	237202192	24,26,25	197221237	119	33	0	0	0.229,0.218,0.202	0.033,0.032,0.028	0.185
ENSG00000089157	RPLP0	12	-	120637112	120638913	120637112	120637288	120638885	120638913	43,58,33	17,22,22	14,11,9	15,15,26	107	21	2.43936e-05	0.000264212	0.332,0.341,0.227	0.155,0.126,0.064	0.185
ENSG00000101158	TH1L	20	+	57568052	57568599	57568052	57568167	57568503	57568599	4,2,4	6,8,5	2,0,0	10,12,16	172	86	0.0063492	0.0359788	0.25,0.111,0.286	0.091,0.0,0.0	0.185
ENSG00000110321	EIF4G2	11	-	10823207	10823756	10823207	10823321	10823595	10823756	26,20,13	34,37,17	7,5,3	38,27,32	172	86	1.00617e-05	0.000122409	0.277,0.213,0.277	0.084,0.085,0.045	0.184
ENSG00000196576	PLXNB2	22	-	50719788	50720171	50719788	50719928	50719994	50720171	124133146	8,9,4	35,39,29	7,4,15	118	86	8.29001e-05	0.00078237	0.919,0.915,0.964	0.785,0.877,0.585	0.184
ENSG00000100325	ASCC2	22	-	30189348	30189665	30189348	30189479	30189565	30189665	68,66,58	2,2,0	4,3,3	4,0,0	158	86	0.00769749	0.0424023	0.949,0.947,1.0	0.352,1.0,1.0	0.181
ENSG00000159069	FBXW5	9	-	139836497	139837147	139836497	139836918	139836998	139837147	36,33,36	0,0,0	7,11,14	1,2,1	146	86	0.00733384	0.0405732	1.0,1.0,1.0	0.805,0.764,0.892	0.18
ENSG00000164111	ANXA5	4	-	122617735	122618130	122617735	122617779	122618017	122618130	23,18,20	32,28,18	0,3,3	32,28,36	123	37	4.3584e-10	1.10772e-08	0.178,0.162,0.251	0.0,0.031,0.024	0.179
ENSG00000179222	MAGED1	X	+	51640890	51641289	51640890	51640982	51641209	51641289	13,10,9	13,12,8	11,7,3	21,22,18	158	72	0.00548558	0.0315022	0.313,0.275,0.339	0.193,0.127,0.071	0.179
ENSG00000161638	ITGA5	12	-	54798213	54798678	54798213	54798259	54798486	54798678	10,13,20	20,25,17	2,0,1	67,65,81	125	39	0	0	0.135,0.14,0.269	0.009,0.0,0.004	0.177
ENSG00000135506	OS9	12	+	58109542	58109976	58109542	58109753	58109871	58109976	8,11,13	32,15,15	1,2,3	22,15,22	172	86	0.00194737	0.013155	0.111,0.268,0.302	0.022,0.063,0.064	0.177
ENSG00000168906	MAT2A	2	+	85769277	85769870	85769277	85769496	85769687	85769870	55,84,55	1,7,8	82,81,68	18,18,16	172	86	0.00391602	0.0238209	0.965,0.857,0.775	0.695,0.692,0.68	0.177
ENSG00000132341	RAN	12	+	131357128	131357465	131357128	131357174	131357380	131357465	10,5,9	6,18,10	1,2,3	52,35,36	117	31	4.75469e-08	8.90898e-07	0.306,0.069,0.193	0.005,0.015,0.022	0.175
ENSG00000135506	OS9	12	+	58112775	58114046	58112775	58112965	58113881	58114046	11,19,13	12,17,15	4,13,6	28,22,16	172	86	0.00404149	0.0244682	0.314,0.358,0.302	0.067,0.228,0.158	0.174
ENSG00000167767	KRT80	12	-	52574296	52574747	52574296	52574392	52574686	52574747	94,96,82	8,4,7	26,26,35	3,7,7	140	54	0.00843842	0.0458929	0.819,0.903,0.819	0.77,0.589,0.659	0.174
ENSG00000124784	RIOK1	6	+	7402835	7403130	7402835	7402948	7403049	7403130	16,21,14	26,32,21	10,3,9	64,62,46	160	74	3.45831e-08	6.72536e-07	0.222,0.233,0.236	0.067,0.022,0.083	0.173
ENSG00000135018	UBQLN1	9	-	86281264	86284242	86281264	86281348	86284099	86284242	17,23,10	27,30,35	8,13,14	157163137	163	77	1.39355e-12	5.03838e-11	0.229,0.266,0.119	0.024,0.036,0.046	0.169
ENSG00000115942	ORC2	2	-	201778017	201778715	201778017	201778136	201778653	201778715	14,16,16	14,18,20	23,12,18	59,75,62	141	55	5.98253e-06	7.64038e-05	0.281,0.257,0.238	0.132,0.059,0.102	0.161
ENSG00000106263	EIF3B	7	+	2419028	2420375	2419028	2419146	2419913	2420375	378397332	4,2,2	76,94,75	6,8,12	172	86	3.46212e-12	1.21743e-10	0.979,0.99,0.988	0.864,0.855,0.758	0.16
ENSG00000106263	EIF3B	7	+	2419028	2420375	2419028	2419146	2419838	2420375	697749611	3,5,1	113144117	9,11,17	172	86	0	0	0.991,0.987,0.997	0.863,0.867,0.775	0.157
ENSG00000100038	TOP3B	22	-	22316800	22317265	22316800	22316974	22317118	22317265	60,48,61	0,0,0	10,14,12	0,2,2	172	86	0.00246205	0.0160408	1.0,1.0,1.0	1.0,0.778,0.75	0.157
ENSG00000130204	TOMM40	19	+	45394476	45394946	45394476	45394571	45394666	45394946	69,102,77	0,1,0	99,93,104	14,8,7	172	86	3.42023e-05	0.00034979	1.0,0.981,1.0	0.78,0.853,0.881	0.156
ENSG00000172262	ZNF131	5	+	43161350	43162033	43161350	43161708	43161810	43162033	11,7,6	21,19,22	1,2,0	53,39,41	172	86	1.30789e-07	2.31542e-06	0.208,0.156,0.12	0.009,0.025,0.0	0.15
ENSG00000185686	PRAME	22	-	22899231	22900000	22899231	22899350	22899964	22900000	25,30,25	20,20,28	15,15,8	32,34,34	115	29	2.51332e-05	0.00027108	0.24,0.274,0.184	0.106,0.1,0.056	0.145
ENSG00000179222	MAGED1	X	+	51644648	51645450	51644648	51645034	51645241	51645450	2,9,4	8,10,8	0,2,4	20,14,15	172	86	0.00941585	0.0497335	0.111,0.31,0.2	0.0,0.067,0.118	0.145
ENSG00000149136	SSRP1	11	-	57094176	57094988	57094176	57094363	57094899	57094988	10,8,8	17,15,10	4,5,9	36,22,30	168	82	0.00253529	0.0163953	0.223,0.207,0.281	0.051,0.1,0.128	0.144
ENSG00000104825	NFKBIB	19	+	39398038	39399531	39398038	39398299	39399370	39399531	63,63,49	0,1,0	54,41,41	1,6,5	172	86	0.00604539	0.034333	1.0,0.969,1.0	0.964,0.774,0.804	0.142
ENSG00000166986	MARS	12	+	57882801	57883128	57882801	57882892	57883049	57883128	2,1,4	6,10,5	0,0,1	24,24,26	156	70	0.000760748	0.00577764	0.13,0.043,0.264	0.0,0.0,0.017	0.14
ENSG00000107185	RGP1	9	+	35750654	35750986	35750654	35750738	35750836	35750986	90,72,94	1,0,0	12,9,19	1,1,1	163	77	0.00214856	0.0141783	0.977,1.0,1.0	0.85,0.81,0.9	0.139
ENSG00000111196	MAGOHB	12	-	10760452	10762540	10760452	10760535	10762429	10762540	14,15,12	30,24,25	5,1,2	24,21,14	162	76	0.00323706	0.0203167	0.18,0.227,0.184	0.089,0.022,0.063	0.139
ENSG00000120889	TNFRSF10B	8	-	22885843	22886115	22885843	22885954	22886041	22886115	121116104	4,3,0	17,11,12	3,0,2	141	67	0.00279004	0.017816	0.935,0.948,1.0	0.729,1.0,0.74	0.138
ENSG00000156261	CCT8	21	-	30439036	30439392	30439036	30439098	30439211	30439392	47,47,29	48,61,49	18,5,9	29,52,53	141	55	2.41939e-05	0.00026316	0.276,0.231,0.188	0.195,0.036,0.062	0.134
ENSG00000084774	CAD	2	+	27456179	27456676	27456179	27456404	27456493	27456676	67,62,61	1,1,0	40,30,18	4,4,1	164	86	0.00287573	0.0183176	0.972,0.97,1.0	0.84,0.797,0.904	0.134
ENSG00000149100	EIF3M	11	+	32615411	32616559	32615411	32615495	32616459	32616559	6,5,10	20,15,14	1,3,2	27,22,20	163	77	0.00251415	0.0163388	0.124,0.136,0.252	0.017,0.061,0.045	0.13
ENSG00000169045	HNRNPH1	5	-	179043869	179044111	179043869	179043959	179044051	179044111	27,26,25	28,34,37	13,13,11	39,41,41	134	50	0.000238857	0.00205066	0.265,0.222,0.201	0.111,0.106,0.091	0.127
ENSG00000155363	MOV10	1	+	113240908	113242432	113240908	113241411	113242306	113242432	1,4,4	7,7,10	0,0,1	20,16,6	172	86	0.00898266	0.0481388	0.067,0.222,0.167	0.0,0.0,0.077	0.126
ENSG00000159377	PSMB4	1	+	151373714	151374106	151373714	151373831	151374017	151374106	12,2,3	15,17,16	0,2,1	24,32,31	168	82	0.000663565	0.00519321	0.281,0.054,0.084	0.0,0.03,0.016	0.124
ENSG00000156983	BRPF1	3	+	9787256	9787614	9787256	9787393	9787495	9787614	92,70,75	0,0,0	9,15,10	1,0,1	172	86	0.00401404	0.0243594	1.0,1.0,1.0	0.818,1.0,0.833	0.116
ENSG00000149480	MTA2	11	-	62364787	62365184	62364787	62364887	62365081	62365184	207221162	17,15,11	42,38,31	8,5,5	172	86	0.00670449	0.0377421	0.859,0.88,0.88	0.724,0.792,0.756	0.116
ENSG00000087088	BAX	19	+	49458804	49459090	49458804	49458856	49458943	49459090	16,22,10	31,33,23	6,10,7	51,52,52	119	45	8.94546e-06	0.000109348	0.163,0.201,0.141	0.043,0.068,0.048	0.115
ENSG00000128272	ATF4	22	+	39916568	39917676	39916568	39916756	39917358	39917676	409458329	12,22,20	265289259	32,28,39	172	86	2.4515e-07	4.19534e-06	0.945,0.912,0.892	0.805,0.838,0.769	0.112
ENSG00000198467	TPM2	9	-	35684484	35685136	35684484	35684547	35685060	35685136	24,14,21	28,22,37	5,12,9	26,36,55	125	39	0.000115315	0.00106864	0.211,0.166,0.15	0.057,0.094,0.049	0.109
ENSG00000100911	PSME2	14	-	24613608	24614364	24613608	24613677	24614266	24614364	11,11,5	24,33,18	1,2,1	23,37,20	148	62	0.000334226	0.00275871	0.161,0.123,0.104	0.018,0.022,0.021	0.109
ENSG00000197114	ZGPAT	20	+	62364938	62366176	62364938	62365091	62366056	62366176	88,102,87	2,0,0	40,38,28	5,2,1	172	86	0.00201597	0.0135118	0.957,1.0,1.0	0.8,0.905,0.933	0.106
ENSG00000071894	CPSF1	8	-	145625559	145625887	145625559	145625670	145625747	145625887	45,46,44	198213164	10,12,11	297287309	140	86	0	0	0.123,0.117,0.141	0.02,0.025,0.021	0.105
ENSG00000137942	FNBP1L	1	+	94016503	94020218	94016503	94016662	94017965	94020218	140156110	3,3,2	62,54,47	7,3,4	172	86	0.00106137	0.00767473	0.959,0.963,0.965	0.816,0.9,0.855	0.105
ENSG00000131899	LLGL1	17	+	18138783	18140074	18138783	18138851	18139920	18140074	6,4,5	22,15,7	3,7,5	49,47,51	147	61	0.00231848	0.0152213	0.102,0.1,0.229	0.025,0.058,0.039	0.103
ENSG00000204386	NEU1	6	-	31826828	31828398	31826828	31827722	31828215	31828398	61,75,62	0,0,0	5,5,3	0,1,0	172	86	0.00365518	0.0223934	1.0,1.0,1.0	1.0,0.714,1.0	0.095
ENSG00000241852	C8orf58	8	+	22459484	22459825	22459484	22459593	22459712	22459825	289229231	0,0,0	22,28,17	2,2,0	172	86	5.13272e-06	6.72229e-05	1.0,1.0,1.0	0.846,0.875,1.0	0.093
ENSG00000115677	HDLBP	2	-	242174535	242175009	242174535	242174670	242174904	242175009	7,7,7	27,34,27	2,2,1	57,57,55	172	86	1.70044e-05	0.000188148	0.115,0.093,0.115	0.017,0.017,0.009	0.093
ENSG00000135446	CDK4	12	-	58144989	58145519	58144989	58145125	58145282	58145519	13,17,11	74,64,55	2,4,1	162152157	172	86	1.83964e-13	6.94464e-12	0.081,0.117,0.091	0.006,0.013,0.003	0.089
ENSG00000183735	TBK1	12	+	64879234	64879797	64879234	64879293	64879705	64879797	10,9,10	38,29,37	3,0,0	60,69,50	137	51	3.25959e-08	6.38731e-07	0.089,0.104,0.091	0.018,0.0,0.0	0.089
ENSG00000026025	VIM	10	+	17277167	17278378	17277167	17277388	17277844	17278378	15,14,15	70,56,45	2,4,7	78,85,64	172	86	5.85185e-06	7.54859e-05	0.097,0.111,0.143	0.013,0.023,0.052	0.088
ENSG00000126012	KDM5C	X	-	53227671	53228070	53227671	53227819	53227945	53228070	105120111	0,0,0	40,45,39	3,0,3	172	86	0.00119845	0.00854558	1.0,1.0,1.0	0.87,1.0,0.867	0.088
ENSG00000131899	LLGL1	17	+	18140148	18141087	18140148	18140253	18140794	18141087	8,9,12	54,28,30	10,6,8	102,99,98	172	86	0.000112678	0.0010518	0.069,0.138,0.167	0.047,0.029,0.039	0.086
ENSG00000167526	RPL13	16	+	89627634	89628159	89627634	89627776	89627985	89628159	16,19,9	51,78,57	2,4,2	68,62,53	172	86	1.45476e-05	0.00016451	0.136,0.109,0.073	0.014,0.031,0.019	0.085
ENSG00000204628	GNB2L1	5	-	180663928	180664719	180663928	180664042	180664608	180664719	18,10,9	55,55,43	5,2,1	53,61,58	172	86	3.98155e-05	0.000402387	0.141,0.083,0.095	0.045,0.016,0.009	0.083
ENSG00000197043	ANXA6	5	-	150518238	150519008	150518238	150518352	150518913	150519008	2,6,3	14,21,25	0,0,0	32,30,27	172	86	0.000943833	0.00692234	0.067,0.125,0.057	0.0,0.0,0.0	0.083
ENSG00000147789	ZNF7	8	+	146054427	146054989	146054427	146054475	146054811	146054989	157167137	0,1,0	28,31,23	1,2,0	127	41	0.00362721	0.0222889	1.0,0.982,1.0	0.9,0.833,1.0	0.083
ENSG00000135506	OS9	12	+	58109542	58109976	58109542	58109753	58109874	58109976	8,10,13	38,54,43	1,2,3	51,55,32	172	86	0.000319777	0.00265653	0.095,0.085,0.131	0.01,0.018,0.045	0.079
ENSG00000166710	B2M	15	+	45007620	45008554	45007620	45007899	45008526	45008554	7,13,12	17,24,17	3,2,2	23,19,25	107	21	0.000329575	0.00272909	0.075,0.096,0.122	0.025,0.02,0.015	0.078
ENSG00000181588	MEX3D	19	-	1554670	1556922	1554670	1555388	1555575	1556922	439365383	18,12,19	423424392	41,32,39	172	86	5.48546e-05	0.000541583	0.924,0.938,0.91	0.838,0.869,0.834	0.077
ENSG00000241945	PWP2	21	+	45544460	45546000	45544460	45544608	45545891	45546000	7,8,7	38,44,53	0,0,0	158143165	172	86	1.29349e-11	4.15048e-10	0.084,0.083,0.062	0.0,0.0,0.0	0.076
ENSG00000184575	XPOT	12	+	64818817	64819237	64818817	64818962	64819117	64819237	23,25,19	103118141	11,6,14	403318382	172	86	3.33067e-16	1.5833e-14	0.1,0.096,0.063	0.013,0.009,0.018	0.073
ENSG00000182325	FBXL6	8	-	145580649	145581162	145580649	145580781	145581098	145581162	2,3,0	6,7,3	0,2,2	34,37,34	143	57	0.00092413	0.00679725	0.117,0.146,0.0	0.0,0.021,0.023	0.073
ENSG00000142684	ZNF593	1	+	26496908	26498551	26496908	26496971	26497065	26498551	12,13,6	64,63,42	1,1,0	92123120	142	56	1.76586e-10	4.80683e-09	0.069,0.075,0.053	0.004,0.003,0.0	0.063
ENSG00000204628	GNB2L1	5	-	180668491	180669345	180668491	180668639	180669173	180669345	21,25,27	129149121	6,5,8	133138132	172	86	5.2745e-07	8.62397e-06	0.075,0.077,0.1	0.022,0.018,0.029	0.061
ENSG00000167526	RPL13	16	+	89627347	89627776	89627347	89627471	89627634	89627776	16,20,15	99111108	2,4,2	80,62,95	172	86	5.68162e-05	0.000558801	0.075,0.083,0.065	0.012,0.031,0.01	0.057
ENSG00000008988	RPS20	8	-	56986618	56987065	56986618	56986718	56986939	56987065	19,21,22	146172121	5,3,3	121136153	172	86	2.36366e-07	4.07215e-06	0.061,0.058,0.083	0.02,0.011,0.01	0.054
ENSG00000110321	EIF4G2	11	-	10821098	10821895	10821098	10821303	10821636	10821895	10,8,7	46,54,56	1,4,2	59,51,53	172	86	0.00449241	0.0265715	0.098,0.069,0.059	0.008,0.038,0.019	0.054
ENSG00000105193	RPS16	19	-	39924161	39924401	39924161	39924209	39924304	39924401	17,33,19	121118108	2,2,3	94,97,109	127	41	2.05133e-09	4.87572e-08	0.043,0.083,0.054	0.007,0.007,0.009	0.052
ENSG00000143862	ARL8A	1	-	202104586	202104928	202104586	202104654	202104834	202104928	47,74,47	325342288	9,17,5	234245219	147	61	3.04096e-11	9.15786e-10	0.057,0.082,0.063	0.016,0.028,0.009	0.05
ENSG00000143702	CEP170	1	-	243349080	243349724	243349080	243349374	243349560	243349724	375427411	4,1,0	57,43,39	1,2,1	172	86	0.000738025	0.00567219	0.979,0.995,1.0	0.966,0.915,0.951	0.047
ENSG00000142541	RPL13A	19	+	49994035	49994356	49994035	49994121	49994296	49994356	14,11,6	59,62,56	5,2,1	56,53,68	132	46	0.0014539	0.0100607	0.076,0.058,0.036	0.03,0.013,0.005	0.041
ENSG00000160014	CALM3	19	+	47111738	47112238	47111738	47111845	47112102	47112238	7,4,3	52,43,45	1,0,2	65,64,77	172	86	0.00206145	0.0137412	0.063,0.044,0.032	0.008,0.0,0.013	0.039
ENSG00000144021	CIAO1	2	+	96934194	96935093	96934194	96934396	96935005	96935093	4,2,1	29,22,29	4,1,1	203204230	167	81	4.87451e-05	0.000484995	0.063,0.042,0.016	0.009,0.002,0.002	0.036
ENSG00000160886	LY6K	8	+	143783017	143785582	143783017	143783131	143784508	143785582	19,21,21	236260271	4,4,2	300295291	172	86	1.34652e-09	3.2304e-08	0.039,0.039,0.037	0.007,0.007,0.003	0.033
ENSG00000075624	ACTB	7	-	5568791	5569294	5568791	5569031	5569165	5569294	15,15,16	233222186	1,3,1	190205188	172	86	7.79148e-07	1.25005e-05	0.031,0.033,0.041	0.003,0.007,0.003	0.031
ENSG00000105618	PRPF31	19	+	54632431	54632745	54632431	54632560	54632646	54632745	7,21,7	203212163	0,1,1	330357303	158	86	2.3446e-08	4.73905e-07	0.018,0.051,0.023	0.0,0.002,0.002	0.029
ENSG00000105618	PRPF31	19	+	54631447	54631752	54631447	54631575	54631679	54631752	8,10,10	110,93,124	3,3,7	281264259	152	66	1.01322e-06	1.56683e-05	0.031,0.045,0.034	0.005,0.005,0.012	0.029
ENSG00000156482	RPL30	8	-	99057170	99057627	99057170	99057316	99057574	99057627	31,40,27	328363316	10,8,4	396391373	132	46	1.5396e-11	4.87921e-10	0.032,0.037,0.029	0.009,0.007,0.004	0.026
ENSG00000108021	FAM208B	10	+	5804494	5805703	5804494	5804609	5804991	5805703	3,2,1	36,37,49	0,0,0	140123132	172	86	0.00257719	0.0166222	0.04,0.026,0.01	0.0,0.0,0.0	0.025
ENSG00000197756	RPL37A	2	+	217363547	217364121	217363547	217363600	217363992	217364121	46,42,28	249241183	17,15,13	156166158	132	46	0.00380603	0.0232068	0.06,0.057,0.051	0.037,0.031,0.028	0.024
ENSG00000026025	VIM	10	+	17277844	17278378	17277844	17277888	17278292	17278378	5,13,6	60,65,76	3,3,4	108,91,99	116	30	0.00122856	0.00873608	0.021,0.049,0.02	0.007,0.008,0.01	0.022
ENSG00000111640	GAPDH	12	+	6645849	6646176	6645849	6645956	6646085	6646176	10,17,13	238224196	7,1,8	256266213	170	84	0.00106926	0.00770109	0.02,0.036,0.032	0.013,0.002,0.018	0.018
ENSG00000106624	AEBP1	7	+	44150323	44150656	44150323	44150408	44150511	44150656	11,18,6	240257225	2,5,4	263254239	164	78	0.000998636	0.00724152	0.021,0.032,0.013	0.004,0.009,0.008	0.015
ENSG00000167996	FTH1	11	-	61732458	61732987	61732458	61732584	61732840	61732987	8,8,2	184179129	0,2,0	164195172	172	86	0.00793423	0.0435957	0.021,0.022,0.008	0.0,0.005,0.0	0.015
ENSG00000111229	ARPC3	12	-	110873914	110874488	110873914	110874009	110874361	110874488	39,44,45	121213141208	9,9,3	159216721661	172	86	1.17874e-05	0.000140084	0.016,0.016,0.018	0.003,0.003,0.001	0.014
ENSG00000168090	COPS6	7	+	99688214	99688775	99688214	99688277	99688660	99688775	4,3,5	201189176	0,2,0	3,7,1	142	56	8.44639e-05	0.000794208	0.008,0.006,0.011	0.0,0.101,0.0	-0.025
ENSG00000169045	HNRNPH1	5	-	179043126	179044111	179043126	179043219	179044021	179044111	15,9,9	171257223	9,10,10	84,113,70	169	83	0.00457809	0.027016	0.041,0.017,0.019	0.05,0.042,0.066	-0.027
ENSG00000131051	RBM39	20	-	34326889	34328809	34326889	34326939	34328745	34328809	7,6,7	76,78,73	7,4,7	8,16,15	100	14	3.37605e-06	4.56122e-05	0.013,0.011,0.013	0.109,0.034,0.061	-0.056
ENSG00000205581	HMGN1	21	-	40717071	40720265	40717071	40717200	40720217	40720265	2,3,4	93,103,91	5,4,1	10,16,13	127	41	6.31756e-06	7.9496e-05	0.007,0.009,0.014	0.139,0.075,0.024	-0.069
ENSG00000231500	RPS18	6	+	33243741	33244287	33243741	33243843	33244167	33244287	6,2,4	137164136	1,1,7	8,17,14	172	86	5.12201e-06	6.72229e-05	0.021,0.006,0.014	0.059,0.029,0.2	-0.082
ENSG00000185963	BICD2	9	-	95473644	95477745	95473644	95475743	95477534	95477745	9,7,4	97,93,78	16,10,12	39,42,43	172	86	2.8057e-06	3.88248e-05	0.044,0.036,0.025	0.17,0.106,0.122	-0.098
ENSG00000234741	GAS5	1	-	173833038	173833442	173833038	173833213	173833394	173833442	9,10,8	110124115	7,6,5	10,16,17	127	41	8.59572e-07	1.33729e-05	0.026,0.025,0.022	0.184,0.108,0.087	-0.102
ENSG00000162852	CNST	1	+	246797225	246797889	246797225	246797312	246797774	246797889	1,1,0	57,60,62	1,1,1	2,2,4	166	80	1.50732e-05	0.000169706	0.008,0.008,0.0	0.194,0.194,0.108	-0.16
ENSG00000129460	NGDN	14	+	23944379	23945361	23944379	23944517	23945237	23945361	7,5,6	99,110,98	2,1,2	3,3,4	172	86	3.19958e-05	0.000330548	0.034,0.022,0.03	0.25,0.143,0.2	-0.169
ENSG00000133226	SRRM1	1	+	24973157	24975520	24973157	24973280	24975349	24975520	0,0,2	18,14,15	1,2,4	3,3,7	172	86	0.00187469	0.0126975	0.0,0.0,0.063	0.143,0.25,0.222	-0.184
ENSG00000115875	SRSF7	2	-	38975720	38976847	38975720	38975795	38976670	38976847	9,11,13	204237171	12,4,10	14,10,17	154	68	5.52891e-14	2.21761e-12	0.019,0.02,0.032	0.275,0.15,0.206	-0.187
ENSG00000111602	TIMELESS	12	-	56814746	56815593	56814746	56814918	56815510	56815593	21,13,25	7,3,2	61,57,57	3,5,0	162	76	0.00645094	0.0364748	0.585,0.67,0.854	0.905,0.842,1.0	-0.213
ENSG00000171530	TBCA	5	-	76987065	76989177	76987065	76987323	76989090	76989177	11,11,8	28,24,20	20,17,26	13,19,17	166	80	0.000438342	0.00351632	0.159,0.181,0.162	0.426,0.301,0.424	-0.216
ENSG00000117335	CD46	1	+	207932983	207934791	207932983	207933069	207934593	207934791	11,10,6	14,22,18	22,7,12	8,7,8	165	79	0.00347685	0.0215062	0.273,0.179,0.138	0.568,0.324,0.418	-0.24
ENSG00000185246	PRPF39	14	+	45565305	45566208	45565305	45565431	45566089	45566208	38,32,38	452443462	53,40,42	47,46,80	172	86	0	0	0.04,0.035,0.04	0.361,0.303,0.208	-0.252
ENSG00000060138	CSDA	12	-	10862506	10865932	10862506	10862713	10865809	10865932	24,22,17	13,19,7	34,51,42	7,11,6	172	86	0.000749836	0.00572866	0.48,0.367,0.548	0.708,0.699,0.778	-0.263
ENSG00000143499	SMYD2	1	+	214504292	214507651	214504292	214504413	214505360	214507651	4,7,10	2,3,7	25,40,35	4,4,7	172	86	0.00687634	0.0384566	0.5,0.538,0.417	0.758,0.833,0.714	-0.283
ENSG00000214655	KIAA0913	10	+	75553904	75554397	75553904	75554088	75554313	75554397	22,34,31	10,6,6	37,24,23	2,1,0	163	77	0.00378661	0.0231434	0.51,0.728,0.709	0.897,0.919,1.0	-0.29
ENSG00000026025	VIM	10	+	17277167	17278378	17277167	17277388	17278292	17278378	10,15,10	111113141	3,2,6	4,5,2	165	79	1.18543e-05	0.00014023	0.041,0.06,0.033	0.264,0.161,0.59	-0.294
ENSG00000100316	RPL3	22	-	39708888	39709315	39708888	39708989	39709195	39709315	5,7,3	14,11,5	28,10,21	8,9,9	172	86	0.00245353	0.016026	0.152,0.241,0.231	0.636,0.357,0.538	-0.302
ENSG00000178719	GRINA	8	+	145065859	145066541	145065859	145065972	145066412	145066541	46,47,48	69,79,66	3,6,15	2,3,2	172	86	0.00243122	0.0159208	0.25,0.229,0.267	0.429,0.5,0.789	-0.324
ENSG00000108671	PSMD11	17	+	30806268	30807215	30806268	30806394	30807163	30807215	3,1,0	91,72,94	1,0,0	0,4,1	131	45	0.00211604	0.0140358	0.011,0.005,0.0	1.0,0.0,0.0	-0.328
ENSG00000214655	KIAA0913	10	+	75553904	75554397	75553904	75554088	75554298	75554397	25,36,31	14,9,17	37,25,24	2,1,0	172	86	1.3874e-05	0.000161151	0.472,0.667,0.477	0.902,0.926,1.0	-0.404
ENSG00000155975	VPS37A	8	+	17137747	17137952	17137747	17137806	17137883	17137952	0,2,2	22,23,15	1,3,3	3,0,2	82	28	0.00529029	0.030655	0.0,0.029,0.044	0.102,1.0,0.339	-0.456
ENSG00000106144	CASP2	7	+	142997296	143001026	142997296	142997387	143000876	143001026	3,10,2	32,21,25	9,10,8	3,3,4	170	84	2.02127e-08	4.12599e-07	0.044,0.19,0.038	0.597,0.622,0.497	-0.481
ENSG00000164889	SLC4A2	7	+	150771125	150771928	150771125	150771380	150771761	150771928	66,65,46	57,52,58	22,26,21	0,2,6	172	86	6.43596e-06	8.05907e-05	0.367,0.385,0.284	1.0,0.867,0.636	-0.489
ENSG00000100360	IFT27	22	-	37154254	37160080	37154254	37154453	37159962	37160080	26,22,30	29,23,18	20,37,42	4,3,0	172	86	7.95342e-08	1.43778e-06	0.31,0.324,0.455	0.714,0.86,1.0	-0.495
ENSG00000111011	RSRC2	12	-	123003385	123005975	123003385	123003598	123005931	123005975	109,102,83	40,36,27	25,24,14	0,1,0	123	37	1.58704e-05	0.000177128	0.45,0.46,0.48	1.0,0.878,1.0	-0.496
ENSG00000063177	RPL18	19	-	49119335	49120680	49119335	49119459	49120572	49120680	7,1,1	299288253	3,2,1	2,0,4	172	86	7.34603e-07	1.18599e-05	0.012,0.002,0.002	0.429,1.0,0.111	-0.508
ENSG00000119707	RBM25	14	+	73566374	73570186	73566374	73566458	73569899	73570186	79105110	74,74,77	302293234	11,11,4	163	77	0	0	0.335,0.401,0.403	0.928,0.926,0.965	-0.56
ENSG00000090061	CCNK	14	+	99967102	99968713	99967102	99967208	99968543	99968713	15,13,14	132117104	3,4,3	1,1,1	172	86	2.89578e-09	6.63702e-08	0.054,0.053,0.063	0.6,0.667,0.6	-0.566
ENSG00000186635	ARAP1	11	-	72407593	72408240	72407593	72407699	72408027	72408240	4,1,2	3,5,3	9,14,6	2,2,0	172	86	0.00582952	0.0334026	0.4,0.091,0.25	0.692,0.778,1.0	-0.576
ENSG00000114021	NIT2	3	+	100064428	100065099	100064428	100064522	100065024	100065099	5,1,3	6,3,2	41,45,27	3,3,3	154	68	2.27446e-05	0.000249511	0.269,0.128,0.398	0.858,0.869,0.799	-0.577
ENSG00000173145	NOC3L	10	-	96116930	96117972	96116930	96117088	96117839	96117972	0,0,2	5,1,4	7,13,8	3,3,1	172	86	0.00297453	0.0189001	0.0,0.0,0.2	0.538,0.684,0.8	-0.607
ENSG00000007923	DNAJC11	1	-	6697506	6698424	6697506	6697564	6698142	6698424	3,2,1	5,4,10	3,7,3	2,0,0	137	51	0.00930181	0.0493342	0.183,0.157,0.036	0.358,1.0,1.0	-0.661
ENSG00000100949	RABGGTA	14	-	24735635	24736095	24735635	24735723	24735981	24736095	5,7,4	7,8,13	24,24,29	1,2,1	167	81	2.57606e-10	6.81725e-09	0.257,0.298,0.13	0.921,0.853,0.934	-0.674
ENSG00000179222	MAGED1	X	+	51640890	51643392	51640890	51641289	51643277	51643392	86,59,60	112,86,89	35,29,19	0,0,1	172	86	0	0	0.277,0.255,0.252	1.0,1.0,0.905	-0.707
ENSG00000151967	SCHIP1	3	+	159603995	159606732	159603995	159604113	159606608	159606732	19,29,20	74,73,54	26,14,28	0,2,4	172	86	0	0	0.114,0.166,0.156	1.0,0.778,0.778	-0.707

## Sheet: SkipExons
GeneID	geneSymbol	chr	strand	exonStart_0base	exonEnd	upstreamES	upstreamEE	downstreamES	downstreamEE	IJC_SAMPLE_1	SJC_SAMPLE_1	IJC_SAMPLE_2	SJC_SAMPLE_2	IncFormLen	SkipFormLen	PValue	FDR	IncLevel1	IncLevel2	IncLevelDifference
ENSG00000113013	HSPA9	5	-	137903337	137903411	137903143	137903250	137904613	137904641	16,15,16	129182132	111,105,92	0,0,0	69	21	0	0	0.036,0.024,0.036	1.0,1.0,1.0	-0.968
ENSG00000100813	ACIN1	14	-	23531376	23531484	23530506	23530831	23531624	23531732	6,5,7	306321261	11,17,16	0,1,0	172	86	0	0	0.01,0.008,0.013	1.0,0.895,1.0	-0.955
ENSG00000133997	MED6	14	-	71052472	71052500	71050802	71051660	71057982	71058098	2,0,0	79,82,60	8,8,10	0,1,1	42	86	0	0	0.049,0.0,0.0	1.0,0.942,0.953	-0.949
ENSG00000186063	AIDA	1	-	222843474	222843592	222841354	222843331	222846654	222846777	8,5,1	272254205	11,13,8	0,1,0	172	86	0	0	0.014,0.01,0.002	1.0,0.867,1.0	-0.947
ENSG00000135316	SYNCRIP	6	-	86328985	86329135	86328535	86328657	86332199	86332405	30,31,25	620683545	39,27,33	2,0,0	172	86	0	0	0.024,0.022,0.022	0.907,1.0,1.0	-0.946
ENSG00000122218	COPA	1	-	160279981	160280048	160278890	160278966	160281657	160281808	1,3,1	69,77,60	11,11,10	0,1,0	103	69	0	0	0.01,0.025,0.011	1.0,0.881,1.0	-0.945
ENSG00000166226	CCT2	12	+	69992101	69992201	69991417	69991546	69993642	69993784	144150122	167818301610	698797774	7,7,6	172	86	0	0	0.041,0.039,0.037	0.98,0.983,0.985	-0.944
ENSG00000168906	MAT2A	2	+	85768377	85768500	85768205	85768283	85768755	85768868	8,9,0	105125140	35,38,36	0,2,0	157	71	0	0	0.033,0.032,0.0	1.0,0.896,1.0	-0.944
ENSG00000175216	CKAP5	11	-	46774184	46774260	46772895	46773084	46774859	46775047	4,1,6	159168155	34,22,14	0,2,0	138	86	0	0	0.015,0.004,0.024	1.0,0.873,1.0	-0.943
ENSG00000047315	POLR2B	4	+	57890170	57890278	57889827	57889917	57891051	57891165	7,8,14	222204215	22,28,16	0,0,1	169	83	0	0	0.015,0.019,0.031	1.0,1.0,0.887	-0.941
ENSG00000185787	MORF4L1	15	+	79187161	79187246	79186399	79186572	79189324	79190075	29,23,28	403391343	49,42,61	2,0,0	156	86	0	0	0.038,0.031,0.043	0.931,1.0,1.0	-0.94
ENSG00000099968	BCL2L13	22	+	18178906	18178976	18138427	18138598	18209442	18211465	1,0,0	14,13,32	6,9,5	0,1,0	126	86	6.69464e-14	4.41655e-12	0.046,0.0,0.0	1.0,0.86,1.0	-0.938
ENSG00000108424	KPNB1	17	+	45750855	45750927	45750383	45750531	45752003	45752148	13,4,5	286300316	46,50,40	5,0,0	130	86	0	0	0.029,0.009,0.01	0.859,1.0,1.0	-0.937
ENSG00000075856	SART3	12	-	108925997	108926110	108924980	108925057	108929134	108929244	0,1,1	55,57,66	9,10,6	0,1,0	156	70	0	0	0.0,0.008,0.007	1.0,0.818,1.0	-0.934
ENSG00000135446	CDK4	12	-	58145282	58145519	58142973	58143100	58145957	58146116	51,50,44	423404302	65,67,77	0,0,1	172	86	0	0	0.057,0.058,0.068	1.0,1.0,0.975	-0.931
ENSG00000060069	CTDP1	18	+	77488906	77489069	77474490	77475528	77496354	77496521	0,1,2	8,4,9	59,47,46	0,0,0	172	86	0	0	0.0,0.111,0.1	1.0,1.0,1.0	-0.93
ENSG00000057608	GDI2	10	-	5808203	5808601	5807191	5808115	5810175	5811352	12,12,8	143129123	24,19,23	0,1,0	172	86	0	0	0.04,0.044,0.031	1.0,0.905,1.0	-0.93
ENSG00000168066	SF1	11	-	64537435	64537525	64536897	64537081	64537727	64537880	5,2,6	50,72,48	25,20,14	0,1,0	166	86	0	0	0.049,0.014,0.061	1.0,0.912,1.0	-0.929
ENSG00000127337	YEATS4	12	+	69764667	69764755	69764485	69764578	69783926	69784411	66,75,58	499563504	237211253	2,0,1	162	86	0	0	0.066,0.066,0.058	0.984,1.0,0.993	-0.929
ENSG00000139921	TMX1	14	+	51716410	51716483	51716185	51716287	51721058	51722759	14,7,14	156186146	27,18,20	0,1,0	132	86	0	0	0.055,0.024,0.059	1.0,0.921,1.0	-0.928
ENSG00000071282	LMCD1	3	+	8556610	8556681	8543508	8543666	8590253	8590549	1,4,0	64,83,48	6,8,7	0,0,1	128	86	0	0	0.01,0.031,0.0	1.0,1.0,0.825	-0.928
ENSG00000064102	ASUN	12	-	27087488	27087563	27081635	27081838	27090728	27091254	0,1,1	49,41,34	3,7,2	0,1,0	136	86	2.06057e-13	1.29554e-11	0.0,0.015,0.018	1.0,0.816,1.0	-0.928
ENSG00000115540	MOB4	2	+	198404834	198404877	198400253	198400354	198405074	198405161	1,2,5	103,103,88	12,6,7	0,1,0	66	80	0	0	0.012,0.023,0.064	1.0,0.879,1.0	-0.927
ENSG00000198901	PRC1	15	-	91524728	91524899	91523471	91523619	91524977	91525211	1,2,2	34,53,42	10,6,4	1,0,0	172	86	0	0	0.014,0.019,0.023	0.833,1.0,1.0	-0.926
ENSG00000039560	RAI14	5	+	34812284	34812313	34811871	34812050	34814687	34814774	6,10,5	192183194	104,79,89	1,0,0	38	80	0	0	0.062,0.103,0.051	0.995,1.0,1.0	-0.926
ENSG00000099917	MED15	22	+	20936945	20937034	20922807	20922918	20937126	20937254	0,0,1	25,14,20	20,19,15	1,0,1	164	86	0	0	0.0,0.0,0.026	0.913,1.0,0.887	-0.925
ENSG00000111424	VDR	12	-	48250911	48251032	48249412	48249584	48251286	48251471	12,10,9	141,112,93	13,19,17	0,1,0	172	86	0	0	0.041,0.043,0.046	1.0,0.905,1.0	-0.925
ENSG00000076382	SPAG5	17	-	26911669	26911763	26911350	26911498	26912119	26912233	1,3,0	35,31,22	10,7,12	1,0,0	172	86	0	0	0.014,0.046,0.0	0.833,1.0,1.0	-0.924
ENSG00000168502	SOGA2	18	+	8821464	8821496	8819044	8819257	8824696	8826230	0,0,0	58,38,39	8,1,3	1,0,1	50	86	3.36287e-13	2.06938e-11	0.0,0.0,0.0	0.932,1.0,0.838	-0.923
ENSG00000110880	CORO1C	12	-	109051079	109051199	109046047	109046193	109052513	109052598	8,29,18	177210193	21,14,17	0,0,1	164	78	0	0	0.021,0.062,0.042	1.0,1.0,0.89	-0.922
ENSG00000135446	CDK4	12	-	58144705	58144873	58143002	58143100	58145957	58146304	18,18,15	423404302	6,4,10	0,0,1	172	86	0	0	0.021,0.022,0.024	1.0,1.0,0.833	-0.922
ENSG00000121152	NCAPH	2	+	97025880	97025987	97024782	97024931	97026325	97026448	1,0,2	14,19,29	3,10,4	0,1,0	172	86	6.54743e-12	3.51659e-10	0.034,0.0,0.033	1.0,0.833,1.0	-0.922
ENSG00000135945	REV1	2	-	100067806	100067963	100065797	100065966	100106278	100106497	3,2,0	21,27,33	7,7,13	0,0,1	172	86	0	0	0.067,0.036,0.0	1.0,1.0,0.867	-0.921
ENSG00000133657	ATP13A3	3	-	194140607	194140696	194134487	194134568	194146070	194146258	21,18,20	211233177	21,18,22	0,1,0	152	74	0	0	0.046,0.036,0.052	1.0,0.898,1.0	-0.921
ENSG00000135698	MPHOSPH6	16	-	82182913	82183008	82181766	82182468	82197686	82197799	0,5,4	128113135	8,6,16	1,0,0	172	86	0	0	0.0,0.022,0.015	0.8,1.0,1.0	-0.921
ENSG00000159352	PSMD4	1	+	151234636	151234777	151227184	151227284	151238783	151238915	15,18,9	172146113	35,40,36	2,0,0	172	86	0	0	0.042,0.058,0.038	0.897,1.0,1.0	-0.92
ENSG00000197102	DYNC1H1	14	+	102500661	102500789	102500312	102500525	102502825	102502979	4,5,7	220202190	20,16,27	1,1,0	172	86	0	0	0.009,0.012,0.018	0.909,0.889,1.0	-0.92
ENSG00000144224	UBXN4	2	+	136529989	136530117	136528140	136528305	136533818	136533921	6,1,5	40,28,36	24,15,20	0,0,1	172	86	0	0	0.07,0.018,0.065	1.0,1.0,0.909	-0.919
ENSG00000242372	EIF6	20	-	33872183	33872295	33868456	33868632	33872528	33872788	3,2,2	41,28,36	11,11,20	0,1,0	172	86	0	0	0.035,0.034,0.027	1.0,0.846,1.0	-0.917
ENSG00000197694	SPTAN1	9	+	131339630	131339785	131339407	131339552	131340388	131340524	1,2,1	22,26,22	10,5,8	1,0,0	172	86	9.76996e-15	6.92621e-13	0.022,0.037,0.022	0.833,1.0,1.0	-0.917
ENSG00000159579	RSPRY1	16	+	57250018	57250085	57247799	57247858	57250815	57250947	0,0,0	22,19,27	5,2,3	1,0,0	86	52	8.15191e-10	3.49094e-08	0.0,0.0,0.0	0.751,1.0,1.0	-0.917
ENSG00000113575	PPP2CA	5	-	133536675	133536765	133536025	133536187	133537538	133537712	33,41,33	334358250	27,22,21	0,0,1	166	86	0	0	0.049,0.056,0.064	1.0,1.0,0.916	-0.916
ENSG00000115758	ODC1	2	-	10584599	10584673	10584220	10584393	10585056	10585175	15,7,10	81,73,67	52,41,43	0,0,0	134	86	0	0	0.106,0.058,0.087	1.0,1.0,1.0	-0.916
ENSG00000143815	LBR	1	-	225602979	225603034	225600155	225600347	225605685	225605882	2,2,1	143101104	4,12,3	1,0,0	96	86	0	0	0.012,0.017,0.009	0.782,1.0,1.0	-0.915
ENSG00000123737	EXOSC9	4	+	122737523	122737602	122735020	122735202	122737926	122738064	1,4,4	307308302	40,34,41	1,5,0	144	86	0	0	0.002,0.008,0.008	0.96,0.802,1.0	-0.915
ENSG00000065150	IPO5	13	+	98668982	98669105	98667979	98668035	98670738	98670958	20,27,21	148143118	38,30,27	0,1,0	135	49	0	0	0.047,0.064,0.061	1.0,0.916,1.0	-0.915
ENSG00000057608	GDI2	10	-	5808456	5808601	5807916	5808115	5810175	5810347	8,9,7	143129123	11,10,12	0,1,0	172	86	0	0	0.027,0.034,0.028	1.0,0.833,1.0	-0.915
ENSG00000173692	PSMD1	2	+	232028348	232028441	232026053	232026223	232029913	232029949	16,15,9	96,97,118	34,41,29	0,2,0	115	29	0	0	0.04,0.038,0.019	1.0,0.838,1.0	-0.914
ENSG00000099917	MED15	22	+	20936897	20937034	20922807	20922918	20937126	20937254	1,0,2	25,14,20	21,19,17	1,0,1	172	86	0	0	0.02,0.0,0.048	0.913,1.0,0.895	-0.913
ENSG00000151332	MBIP	14	-	36781164	36781230	36780778	36780931	36783717	36783814	14,7,8	142131158	20,10,22	2,0,0	118	86	0	0	0.067,0.037,0.036	0.879,1.0,1.0	-0.913
ENSG00000055813	CCDC85A	2	+	56570013	56570090	56411257	56412035	56611400	56613308	28,17,14	140125136	106,63,102	0,0,1	140	86	0	0	0.109,0.077,0.059	1.0,1.0,0.984	-0.913
ENSG00000157800	SLC37A3	7	-	140045668	140045770	140037083	140037149	140055467	140055564	0,0,0	9,8,18	3,7,4	0,1,0	145	59	1.60787e-08	5.87671e-07	0.0,0.0,0.0	1.0,0.74,1.0	-0.913
ENSG00000138750	NUP54	4	-	77052382	77052437	77051808	77051902	77053675	77053872	0,1,1	36,34,45	8,2,4	2,0,0	96	86	1.06215e-12	6.17585e-11	0.0,0.026,0.02	0.782,1.0,1.0	-0.912
ENSG00000136051	KIAA1033	12	+	105550503	105550570	105546120	105546229	105551013	105551100	1,0,1	35,41,27	4,6,5	0,0,1	114	80	1.19571e-13	7.68861e-12	0.02,0.0,0.025	1.0,1.0,0.778	-0.911
ENSG00000135446	CDK4	12	-	58144989	58145125	58142964	58143100	58145957	58146105	62,66,69	423404302	56,73,84	0,0,1	172	86	0	0	0.068,0.076,0.103	1.0,1.0,0.977	-0.91
ENSG00000163872	YEATS2	3	+	183521043	183521123	183519242	183519316	183521774	183521976	3,3,0	33,19,27	99,105,89	4,2,2	127	67	0	0	0.046,0.077,0.0	0.929,0.965,0.959	-0.91
ENSG00000086061	DNAJA1	9	+	33029882	33029987	33026810	33026988	33030437	33030665	25,19,24	339374365	37,44,45	1,2,1	172	86	0	0	0.036,0.025,0.032	0.949,0.917,0.957	-0.91
ENSG00000077809	GTF2I	7	+	74114935	74114964	74114576	74114760	74119495	74119550	1,2,1	55,59,42	3,7,5	0,2,0	22	48	2.89768e-14	1.97984e-12	0.038,0.069,0.049	1.0,0.884,1.0	-0.909
ENSG00000131828	PDHA1	X	+	19369398	19369525	19368054	19368228	19375769	19375837	5,5,3	56,70,64	10,4,6	1,0,0	147	61	0	0	0.036,0.029,0.019	0.806,1.0,1.0	-0.907
ENSG00000168818	STX18	4	-	4426890	4426949	4425244	4425314	4436496	4436585	0,0,0	29,38,37	16,10,8	2,0,1	77	59	0	0	0.0,0.0,0.0	0.86,1.0,0.86	-0.907
ENSG00000174231	PRPF8	17	-	1564286	1564456	1563991	1564121	1564564	1564700	14,12,9	169171145	21,16,19	0,0,2	172	86	0	0	0.04,0.034,0.03	1.0,1.0,0.826	-0.907
ENSG00000133641	C12orf29	12	+	88440583	88440753	88439358	88439556	88442010	88443002	0,5,0	31,29,24	8,6,5	1,0,0	172	86	1.65756e-13	1.05172e-11	0.0,0.079,0.0	0.8,1.0,1.0	-0.907
ENSG00000128513	POT1	7	-	124486995	124487052	124482860	124483017	124491925	124492005	1,1,0	12,7,21	10,6,2	1,0,0	87	73	4.65787e-10	2.05039e-08	0.065,0.107,0.0	0.894,1.0,1.0	-0.907
ENSG00000117519	CNN3	1	-	95367676	95367814	95367224	95367341	95368677	95368744	37,34,27	282287220	43,31,37	0,2,0	146	60	0	0	0.051,0.046,0.048	1.0,0.864,1.0	-0.906
ENSG00000198408	MGEA5	10	-	103551110	103551196	103550652	103550845	103552595	103552700	3,0,3	35,16,23	9,15,9	1,0,0	158	86	0	0	0.045,0.0,0.066	0.83,1.0,1.0	-0.906
ENSG00000138430	OLA1	2	-	174943695	174943818	174937174	174940255	175006552	175006728	6,4,4	115108119	14,14,18	0,1,1	172	86	0	0	0.025,0.018,0.017	1.0,0.875,0.9	-0.905
ENSG00000148154	UGCG	9	+	114685096	114685231	114676884	114677026	114687056	114687158	13,7,12	94143109	12,6,7	1,0,0	172	86	0	0	0.065,0.024,0.052	0.857,1.0,1.0	-0.905
ENSG00000103342	GSPT1	16	-	11991696	11991738	11990414	11990642	12009225	12009825	1,5,1	142111108	5,3,3	0,0,1	70	86	4.66294e-15	3.38472e-13	0.009,0.052,0.011	1.0,1.0,0.787	-0.905
ENSG00000213445	SIPA1	11	+	65413324	65413428	65412425	65412600	65413691	65413849	0,0,0	15,22,20	5,3,1	1,0,0	172	86	1.76688e-08	6.42769e-07	0.0,0.0,0.0	0.714,1.0,1.0	-0.905
ENSG00000053254	FOXN3	14	-	89656727	89656793	89647044	89647150	89817015	89817152	4,2,0	24,34,22	29,19,23	2,0,1	118	86	0	0	0.108,0.041,0.0	0.914,1.0,0.944	-0.903
ENSG00000198826	ARHGAP11A	15	+	32921795	32921963	32920928	32921003	32925179	32925309	6,5,4	52,51,39	12,8,7	1,0,0	154	68	0	0	0.048,0.041,0.043	0.841,1.0,1.0	-0.903
ENSG00000091140	DLD	7	+	107542769	107542838	107531414	107531734	107543922	107543992	11,16,10	140139101	11,12,12	0,1,0	101	63	0	0	0.047,0.067,0.058	1.0,0.882,1.0	-0.903
ENSG00000104866	PPP1R37	19	+	45641771	45641869	45596217	45596785	45643763	45643864	10,23,15	135123133	115,92,92	2,2,2	172	86	0	0	0.036,0.086,0.053	0.966,0.958,0.958	-0.902
ENSG00000096968	JAK2	9	+	4985939	4986022	4985244	4985630	5021962	5022213	0,1,0	7,16,19	5,5,6	1,0,0	152	86	1.69063e-09	6.96207e-08	0.0,0.034,0.0	0.739,1.0,1.0	-0.902
ENSG00000135698	MPHOSPH6	16	-	82182913	82183008	82181766	82182468	82185028	82185119	0,4,1	5,15,5	11,9,20	0,0,1	170	84	1.09274e-10	5.18814e-09	0.0,0.116,0.09	1.0,1.0,0.908	-0.901
ENSG00000196937	FAM3C	7	-	121002950	121003001	121000096	121000181	121004183	121004242	5,10,7	217221210	11,4,3	0,1,0	46	44	0	0	0.022,0.041,0.031	1.0,0.793,1.0	-0.9
ENSG00000151465	CDC123	10	+	12252288	12252321	12251965	12252023	12257738	12257834	2,2,0	76,80,72	5,2,2	0,1,0	26	51	2.38366e-11	1.20331e-09	0.049,0.047,0.0	1.0,0.797,1.0	-0.9
ENSG00000119900	OGFRL1	6	+	72006019	72006098	72003235	72003314	72006374	72006520	14,11,9	76,93,71	26,20,11	0,1,0	130	72	0	0	0.093,0.061,0.066	1.0,0.917,1.0	-0.899
ENSG00000111639	MRPL51	12	-	6602027	6602138	6601312	6601633	6602223	6602764	44,61,41	289277229	73,62,69	2,0,0	172	86	0	0	0.071,0.099,0.082	0.948,1.0,1.0	-0.899
ENSG00000175063	UBE2C	20	+	44442075	44442103	44441312	44441435	44443022	44443109	5,7,10	185192199	16,26,21	0,3,1	36	80	0	0	0.057,0.075,0.1	1.0,0.951,0.979	-0.899
ENSG00000154845	PPP4R1	18	-	9584512	9584578	9583114	9583273	9584718	9584826	1,6,1	101122112	5,4,8	0,1,0	118	86	0	0	0.007,0.035,0.006	1.0,0.745,1.0	-0.899
ENSG00000132846	ZBED3	5	-	76374418	76374553	76367896	76373720	76382935	76383148	1,1,3	26,29,34	49,59,40	2,2,2	172	86	0	0	0.019,0.017,0.042	0.925,0.937,0.909	-0.898
ENSG00000173744	AGFG1	2	+	228401616	228401709	228401340	228401420	228416674	228416833	6,2,1	52,38,49	25,13,10	1,1,0	159	73	0	0	0.05,0.024,0.009	0.92,0.856,1.0	-0.898
ENSG00000075420	FNDC3B	3	+	171830241	171830380	171757417	171757561	171851260	171851336	2,7,7	58,34,42	14,12,12	1,0,0	155	69	0	0	0.015,0.084,0.069	0.862,1.0,1.0	-0.898
ENSG00000078668	VDAC3	8	+	42251328	42251402	42249373	42249446	42251727	42251796	7,7,3	69,61,75	8,9,4	0,1,0	90	42	0	0	0.045,0.051,0.018	1.0,0.808,1.0	-0.898
ENSG00000135679	MDM2	12	+	69208382	69208469	69202987	69203072	69210591	69210725	7,3,4	129713051156	91,73,81	1,8,5	152	78	0	0	0.003,0.001,0.002	0.979,0.824,0.893	-0.897
ENSG00000116161	CACYBP	1	+	174976233	174976333	174975880	174975977	174977744	174977842	8,10,3	58,66,74	11,12,11	0,0,1	172	86	0	0	0.065,0.07,0.02	1.0,1.0,0.846	-0.897
ENSG00000170312	CDK1	10	+	62539898	62539960	62538211	62538328	62544462	62544619	29,26,18	232236226	36,21,43	0,0,3	110	86	0	0	0.089,0.079,0.059	1.0,1.0,0.918	-0.897
ENSG00000113712	CSNK1A1	5	-	148929637	148929744	148904607	148904734	148930404	148931007	11,12,6	55,63,68	18,20,25	0,1,0	172	86	0	0	0.091,0.087,0.042	1.0,0.909,1.0	-0.896
ENSG00000196591	HDAC2	6	-	114274440	114274582	114270331	114270424	114292020	114292449	3,5,6	35,35,29	16,20,15	1,0,0	172	86	0	0	0.041,0.067,0.094	0.889,1.0,1.0	-0.896
ENSG00000115758	ODC1	2	-	10584599	10584673	10583827	10583962	10585056	10585175	6,4,4	33,46,25	23,23,29	1,0,0	134	86	0	0	0.104,0.053,0.093	0.937,1.0,1.0	-0.896
ENSG00000100815	TRIP11	14	-	92477329	92477416	92473983	92474196	92480558	92480921	2,1,2	35,21,20	75,57,71	4,4,0	160	86	0	0	0.03,0.025,0.051	0.91,0.885,1.0	-0.896
ENSG00000147274	RBMX	X	-	135957244	135957327	135954426	135954504	135957416	135957542	10,7,6	61,46,64	15,11,16	1,0,0	137	71	0	0	0.078,0.073,0.046	0.886,1.0,1.0	-0.896
ENSG00000103429	BFAR	16	+	14758725	14758928	14755748	14755922	14761491	14761925	7,2,8	50,56,36	5,10,27	0,0,2	172	86	0	0	0.065,0.018,0.1	1.0,1.0,0.871	-0.896
ENSG00000168291	PDHB	3	-	58414078	58414341	58413409	58413906	58415434	58415526	3,0,0	23,19,11	8,3,6	0,0,1	171	85	3.18803e-10	1.42862e-08	0.061,0.0,0.0	1.0,1.0,0.749	-0.896
ENSG00000161057	PSMC2	7	+	103004589	103004754	103003790	103003886	103006522	103006610	37,44,39	245238234	41,64,68	2,0,0	167	81	0	0	0.068,0.082,0.075	0.909,1.0,1.0	-0.895
ENSG00000134900	TPP2	13	+	103301757	103301836	103301256	103301501	103309405	103309557	3,7,3	73,85,68	6,3,6	0,0,1	144	86	1.11022e-14	7.835e-13	0.024,0.047,0.026	1.0,1.0,0.782	-0.895
ENSG00000115966	ATF2	2	-	175976295	175976382	175962171	175962321	175994865	175994935	2,7,5	44,55,49	9,5,4	1,0,0	137	63	5.27356e-14	3.51255e-12	0.02,0.055,0.045	0.805,1.0,1.0	-0.895
ENSG00000135446	CDK4	12	-	58145282	58145442	58143002	58143100	58145957	58146059	23,25,26	423404302	10,8,7	0,0,1	172	86	0	0	0.026,0.03,0.041	1.0,1.0,0.778	-0.894
ENSG00000077147	TM9SF3	10	-	98286969	98287046	98277865	98282087	98287169	98287253	51,54,45	297316274	37,34,30	0,1,0	131	77	0	0	0.092,0.091,0.088	1.0,0.952,1.0	-0.894
ENSG00000085760	MTIF2	2	-	55464423	55464564	55463757	55463956	55467146	55467311	4,2,2	39,39,45	5,6,7	0,0,1	172	86	3.45279e-14	2.34624e-12	0.049,0.025,0.022	1.0,1.0,0.778	-0.894
ENSG00000108773	KAT2A	17	-	40269924	40270035	40269695	40269832	40271262	40271454	2,1,3	23,27,18	9,7,1	1,0,0	172	86	5.12512e-11	2.50399e-09	0.042,0.018,0.077	0.818,1.0,1.0	-0.894
ENSG00000104093	DMXL2	15	-	51757762	51757848	51756871	51757073	51758380	51758508	0,1,0	9,6,9	6,3,1	1,0,0	158	86	1.39182e-05	0.000323497	0.0,0.083,0.0	0.766,1.0,1.0	-0.894
ENSG00000170540	ARL6IP1	16	-	18810022	18810156	18809246	18809366	18812752	18812917	14,13,10	46,62,48	48,55,53	0,0,0	172	86	0	0	0.132,0.095,0.094	1.0,1.0,1.0	-0.893
ENSG00000134440	NARS	18	-	55273847	55273983	55273088	55273202	55274675	55274715	16,16,12	182168136	20,19,22	0,0,2	119	33	0	0	0.024,0.026,0.024	1.0,1.0,0.753	-0.893
ENSG00000204713	TRIM27	6	-	28875012	28875039	28872330	28872442	28887788	28888019	1,4,9	161157150	6,6,3	1,1,0	40	86	0	0	0.013,0.052,0.114	0.928,0.928,1.0	-0.892
ENSG00000117523	PRRC2C	1	+	171537385	171537478	171535730	171535982	171544065	171544267	21,17,24	86,99,76	101,92,95	0,0,0	172	86	0	0	0.109,0.079,0.136	1.0,1.0,1.0	-0.892
ENSG00000110958	PTGES3	12	-	57066523	57066593	57065532	57065631	57066735	57066849	18,21,15	136138130	25,17,18	0,0,1	126	86	0	0	0.083,0.094,0.073	1.0,1.0,0.925	-0.892
ENSG00000182446	NPLOC4	17	-	79567366	79567453	79564270	79564342	79571573	79571753	0,0,1	20,15,10	5,8,11	0,0,2	139	65	2.17867e-11	1.10476e-09	0.0,0.0,0.045	1.0,1.0,0.72	-0.892
ENSG00000204560	DHX16	6	-	30623974	30624042	30623211	30623374	30624167	30624286	1,1,0	10,10,10	13,6,1	0,1,0	122	86	1.49631e-08	5.4899e-07	0.066,0.066,0.0	1.0,0.809,1.0	-0.892
ENSG00000136738	STAM	10	+	17746968	17747023	17746429	17746517	17747586	17747740	4,2,2	67,56,67	2,6,4	0,0,1	91	81	1.74005e-12	9.8821e-11	0.05,0.031,0.026	1.0,1.0,0.781	-0.891
ENSG00000115970	THADA	2	-	43804160	43804381	43801474	43802166	43805651	43805746	0,1,2	11,18,9	8,3,5	1,0,0	172	86	1.40007e-08	5.1581e-07	0.0,0.027,0.1	0.8,1.0,1.0	-0.891
ENSG00000113360	DROSHA	5	-	31409356	31409439	31409162	31409266	31421378	31421484	0,0,2	12,9,10	11,6,11	0,1,0	152	86	1.87095e-10	8.66159e-09	0.0,0.0,0.102	1.0,0.772,1.0	-0.89
ENSG00000136205	TNS3	7	-	47385784	47385954	47384521	47384636	47407961	47409218	2,1,0	13,5,4	9,10,10	0,1,0	172	86	1.0533e-08	3.94238e-07	0.071,0.091,0.0	1.0,0.833,1.0	-0.89
ENSG00000170004	CHD3	17	+	7806254	7806379	7805927	7806045	7806589	7806821	4,1,5	32,38,38	8,9,8	0,0,1	172	86	6.66134e-16	5.14747e-14	0.059,0.013,0.062	1.0,1.0,0.8	-0.889
ENSG00000165671	NSD1	5	+	176709465	176709582	176707565	176707835	176710787	176710929	0,0,0	88,89,87	3,4,1	0,1,0	172	86	7.21645e-14	4.74821e-12	0.0,0.0,0.0	1.0,0.667,1.0	-0.889
ENSG00000169359	SLC33A1	3	-	155560220	155560408	155551645	155551830	155571011	155572167	4,1,4	57,50,50	6,2,6	0,0,1	172	86	9.14935e-13	5.37003e-11	0.034,0.01,0.038	1.0,1.0,0.75	-0.889
ENSG00000059758	CDK17	12	-	96691047	96691110	96688776	96688900	96691404	96691499	1,7,2	62,60,45	5,1,4	1,0,0	112	86	3.1469e-10	1.4119e-08	0.012,0.082,0.033	0.793,1.0,1.0	-0.889
ENSG00000163938	GNL3	3	+	52724607	52724720	52723089	52723222	52724960	52725087	1,3,4	33,39,45	23,17,19	0,0,3	172	86	0	0	0.015,0.037,0.043	1.0,1.0,0.76	-0.888
ENSG00000102401	ARMCX3	X	+	100878803	100878883	100878117	100878266	100879147	100879208	9,6,3	41,69,34	11,16,5	1,0,0	114	54	0	0	0.094,0.04,0.04	0.839,1.0,1.0	-0.888
ENSG00000141380	SS18	18	-	23618518	23618623	23614968	23615091	23619252	23619420	8,19,29	119,129,97	22,17,13	0,1,0	172	86	0	0	0.033,0.069,0.13	1.0,0.895,1.0	-0.888
ENSG00000169359	SLC33A1	3	-	155551256	155551374	155547476	155547692	155560220	155560408	0,0,3	20,13,16	2,3,6	0,0,1	172	86	9.26017e-08	3.03603e-06	0.0,0.0,0.086	1.0,1.0,0.75	-0.888
ENSG00000095370	SH2D3C	9	-	130523889	130523929	130513450	130513579	130533464	130533717	3,0,0	26,31,39	3,1,2	1,0,0	66	86	9.92578e-07	2.79937e-05	0.131,0.0,0.0	0.796,1.0,1.0	-0.888
ENSG00000136153	LMO7	13	+	76419462	76419515	76416986	76417052	76423214	76423428	4,3,2	71,76,44	8,8,10	2,0,0	65	59	0	0	0.049,0.035,0.04	0.784,1.0,1.0	-0.887
ENSG00000116120	FARSB	2	-	223493555	223493607	223488990	223489198	223494831	223494893	4,3,2	66,59,63	8,5,2	2,0,0	59	55	2.14273e-13	1.34651e-11	0.053,0.045,0.029	0.789,1.0,1.0	-0.887
ENSG00000110756	HPS5	11	-	18305341	18305448	18303496	18303767	18306892	18307006	2,0,1	24,28,39	5,5,5	1,0,0	172	86	3.96383e-12	2.1757e-10	0.04,0.0,0.013	0.714,1.0,1.0	-0.887
ENSG00000165322	ARHGAP12	10	-	32098157	32098235	32097921	32098056	32099576	32099675	2,2,1	42,24,37	1,1,5	0,0,1	142	86	1.06836e-07	3.4653e-06	0.028,0.048,0.016	1.0,1.0,0.752	-0.887
ENSG00000129315	CCNT1	12	-	49089781	49089945	49089541	49089612	49093560	49093623	117122130	320336246	554348464	1,2,0	120	34	0	0	0.094,0.093,0.13	0.994,0.98,1.0	-0.886
ENSG00000118873	RAB3GAP2	1	-	220383729	220383831	220379248	220379348	220384142	220384218	1,0,1	26,23,32	4,7,5	0,0,1	155	69	5.38025e-12	2.91588e-10	0.017,0.0,0.014	1.0,1.0,0.69	-0.886
ENSG00000213341	CHUK	10	-	101978764	101978889	101978474	101978582	101979026	101979116	3,0,0	26,16,16	5,5,5	1,0,0	169	83	9.28642e-10	3.95771e-08	0.054,0.0,0.0	0.711,1.0,1.0	-0.886
ENSG00000125107	CNOT1	16	-	58565861	58565979	58564149	58564251	58566135	58566299	5,1,2	28,33,39	6,8,7	0,0,1	172	86	4.91829e-14	3.28823e-12	0.082,0.015,0.025	1.0,1.0,0.778	-0.885
ENSG00000164109	MAD2L1	4	-	120986826	120986973	120983129	120983250	120987816	120988229	1,2,1	7,10,9	7,13,15	0,1,0	172	86	1.18985e-10	5.63632e-09	0.067,0.091,0.053	1.0,0.867,1.0	-0.885
ENSG00000149792	MRPL49	11	+	64891973	64892124	64889654	64889812	64892959	64893205	5,4,1	36,50,43	13,10,15	2,0,0	172	86	0	0	0.065,0.038,0.011	0.765,1.0,1.0	-0.884
ENSG00000041357	PSMA4	15	+	78834518	78834561	78834246	78834272	78834824	78834987	4,2,2	40,32,40	8,12,6	0,0,1	36	19	3.33067e-16	2.64431e-14	0.05,0.032,0.026	1.0,1.0,0.76	-0.884
ENSG00000105576	TNPO2	19	-	12814527	12814615	12814241	12814340	12816053	12816212	1,2,3	14,15,13	9,13,12	0,0,1	162	86	2.74114e-13	1.70876e-11	0.037,0.066,0.109	1.0,1.0,0.864	-0.884
ENSG00000116001	TIA1	2	-	70456190	70456223	70454866	70454954	70456395	70456450	2,0,0	11,10,8	18,18,19	1,2,0	21	43	5.27578e-13	3.17281e-11	0.271,0.0,0.0	0.974,0.949,1.0	-0.884
ENSG00000111666	CHPT1	12	+	102120071	102120182	102117499	102117625	102122678	102122852	0,3,2	15,22,11	8,1,4	1,0,0	172	86	6.54239e-08	2.19884e-06	0.0,0.064,0.083	0.8,1.0,1.0	-0.884
ENSG00000015153	YAF2	12	-	42631400	42631526	42555414	42555567	42631956	42632050	6,7,6	61,67,65	15,17,15	2,0,0	172	86	0	0	0.047,0.05,0.044	0.789,1.0,1.0	-0.883
ENSG00000153560	UBP1	3	-	33450727	33450838	33444292	33444396	33450940	33451093	3,2,4	46,44,25	4,7,3	0,1,0	172	86	2.05026e-11	1.04304e-09	0.032,0.022,0.074	1.0,0.778,1.0	-0.883
ENSG00000166855	CLPX	15	-	65454941	65454983	65450912	65451089	65456366	65456526	0,0,0	50,47,34	7,3,2	0,2,0	70	86	3.83553e-11	1.89488e-09	0.0,0.0,0.0	1.0,0.648,1.0	-0.883
ENSG00000174799	CEP135	4	+	56835228	56835294	56831031	56832025	56837435	56837574	1,0,0	19,24,17	3,1,8	1,0,0	118	86	1.09086e-08	4.07561e-07	0.037,0.0,0.0	0.686,1.0,1.0	-0.883
ENSG00000135046	ANXA1	9	+	75781012	75781108	75780031	75780125	75782412	75782471	34,34,44	235275225	38,38,54	2,1,0	138	52	0	0	0.052,0.045,0.069	0.877,0.935,1.0	-0.882
ENSG00000112640	PPP2R5D	6	+	42975151	42975244	42974933	42975044	42975672	42975803	1,0,0	24,15,18	4,7,3	1,0,0	172	86	1.15095e-09	4.84543e-08	0.02,0.0,0.0	0.667,1.0,1.0	-0.882
ENSG00000106263	EIF3B	7	+	2411411	2411484	2409106	2409317	2412307	2412430	17,22,23	129125105	52,55,75	1,0,1	132	86	0	0	0.079,0.103,0.125	0.971,1.0,0.98	-0.881
ENSG00000181789	COPG1	3	+	128976569	128976703	128974910	128974997	128979175	128979243	6,2,3	13,18,27	19,11,15	1,0,0	141	55	1.11022e-16	9.06291e-15	0.153,0.042,0.042	0.881,1.0,1.0	-0.881
ENSG00000168502	SOGA2	18	+	8798094	8798289	8796229	8796460	8806890	8807058	3,3,2	32,40,33	6,7,4	1,0,0	172	86	2.71538e-12	1.5172e-10	0.045,0.036,0.029	0.75,1.0,1.0	-0.88
ENSG00000175063	UBE2C	20	+	44444028	44444179	44441273	44441435	44444492	44444552	0,2,3	32,40,31	4,4,6	0,0,1	139	53	1.37369e-11	7.14319e-10	0.0,0.019,0.036	1.0,1.0,0.696	-0.88
ENSG00000148840	PPRC1	10	+	103904776	103904847	103898856	103901761	103906428	103907149	0,1,5	21,22,16	7,5,8	0,0,1	128	86	8.57693e-11	4.10663e-09	0.0,0.03,0.174	1.0,1.0,0.843	-0.88
ENSG00000130734	ATG4D	19	+	10657864	10657929	10655632	10655806	10662572	10662651	0,0,2	4,7,7	6,6,1	1,0,0	102	72	6.00226e-05	0.00122213	0.0,0.0,0.168	0.809,1.0,1.0	-0.88
ENSG00000108592	FTSJ3	17	-	61898389	61898475	61898198	61898298	61898713	61899003	1,7,2	27,42,35	14,14,12	0,0,2	158	86	0	0	0.02,0.083,0.03	1.0,1.0,0.766	-0.878
ENSG00000242372	EIF6	20	-	33871978	33872295	33868456	33868632	33872528	33872573	11,13,6	41,28,36	30,25,37	0,1,0	124	38	0	0	0.076,0.125,0.049	1.0,0.885,1.0	-0.878
ENSG00000115464	USP34	2	-	61433894	61434021	61433151	61433259	61436033	61436112	2,3,1	27,17,21	7,7,4	1,0,0	158	72	9.34669e-11	4.46318e-09	0.033,0.074,0.021	0.761,1.0,1.0	-0.878
ENSG00000103194	USP10	16	+	84773914	84773975	84733554	84733717	84778238	84779279	2,1,2	63,49,50	3,2,3	0,0,1	108	86	1.65644e-09	6.83709e-08	0.025,0.016,0.031	1.0,1.0,0.705	-0.878
ENSG00000205476	CCDC85C	14	-	99983424	99983520	99981536	99981672	99988469	99988577	2,0,1	25,13,6	5,3,6	0,0,1	172	86	2.35057e-08	8.4013e-07	0.038,0.0,0.077	1.0,1.0,0.75	-0.878
ENSG00000131080	EDA2R	X	-	65824262	65824348	65822474	65822639	65824889	65825068	0,0,1	15,19,10	4,3,4	0,0,1	158	86	1.02983e-07	3.35078e-06	0.0,0.0,0.052	1.0,1.0,0.685	-0.878
ENSG00000130177	CDC16	13	+	115004464	115004503	115002276	115002371	115004824	115004965	2,0,3	28,23,29	1,4,4	0,0,1	64	86	1.90605e-07	5.9859e-06	0.088,0.0,0.122	1.0,1.0,0.843	-0.878
ENSG00000139684	ESD	13	-	47358386	47358485	47356801	47356926	47361155	47361244	13,10,20	115,98,96	35,26,38	0,0,4	168	82	0	0	0.052,0.047,0.092	1.0,1.0,0.823	-0.877
ENSG00000122299	ZC3H7A	16	-	11856526	11856603	11855765	11855899	11857333	11857515	2,2,1	86,68,74	11,10,7	0,1,1	140	86	0	0	0.014,0.018,0.008	1.0,0.86,0.811	-0.877
ENSG00000071282	LMCD1	3	+	8574422	8574511	8543510	8543666	8590253	8590589	11,10,8	64,83,48	7,4,11	0,0,1	164	86	4.44089e-15	3.23486e-13	0.083,0.059,0.08	1.0,1.0,0.852	-0.877
ENSG00000115419	GLS	2	+	191789268	191789319	191788642	191788709	191792031	191792208	4,7,8	65,55,94	4,11,7	0,0,1	62	60	0	0	0.056,0.11,0.076	1.0,1.0,0.871	-0.876
ENSG00000006125	AP2B1	17	+	33954649	33954745	33954403	33954524	33963359	33963475	6,10,5	55,64,51	5,8,12	0,1,0	172	86	3.33067e-16	2.64431e-14	0.052,0.072,0.047	1.0,0.8,1.0	-0.876
ENSG00000078403	MLLT10	10	+	21970260	21970305	21962278	21962848	22002700	22002879	2,1,3	45,49,44	11,3,5	0,1,0	76	86	1.07692e-14	7.61723e-13	0.048,0.023,0.072	1.0,0.772,1.0	-0.876
ENSG00000169180	XPO6	16	-	28117363	28117535	28115866	28116028	28117703	28117818	0,2,3	23,27,16	7,6,9	0,1,0	172	86	2.77012e-12	1.5457e-10	0.0,0.036,0.086	1.0,0.75,1.0	-0.876
ENSG00000204262	COL5A2	2	-	189907445	189907499	189906311	189906419	189907876	189907984	71,65,63	446452384	52,60,62	0,0,0	94	86	0	0	0.127,0.116,0.131	1.0,1.0,1.0	-0.875
ENSG00000185721	DRG1	22	+	31799014	31799190	31796605	31796729	31816241	31816411	6,3,6	81,53,47	15,13,9	1,1,0	172	86	0	0	0.036,0.028,0.06	0.882,0.867,1.0	-0.875
ENSG00000131473	ACLY	17	-	40025726	40025840	40025295	40025378	40027941	40028085	12,8,5	75,77,65	17,22,22	0,0,3	162	76	0	0	0.07,0.046,0.035	1.0,1.0,0.775	-0.875
ENSG00000196705	ZNF431	19	+	21326353	21326446	21324839	21324989	21349137	21349264	9,6,4	102106112	3,5,10	0,1,0	172	86	5.55112e-16	4.31905e-14	0.042,0.028,0.018	1.0,0.714,1.0	-0.875
ENSG00000156171	DRAM2	1	-	111668848	111668916	111667363	111667503	111674045	111674190	0,2,0	1,11,3	2,3,4	0,0,1	122	86	0.00141465	0.0207234	0.0,0.114,0.0	1.0,1.0,0.738	-0.875
ENSG00000197119	SLC25A29	14	-	100765178	100765222	100759630	100759714	100772535	100772869	1,3,3	15,26,21	20,20,29	0,1,0	65	77	0	0	0.073,0.12,0.145	1.0,0.96,1.0	-0.874
ENSG00000155506	LARP1	5	+	154170204	154170270	154169884	154169946	154172181	154172356	10,12,0	43,62,46	35,32,15	0,1,1	87	55	0	0	0.128,0.109,0.0	1.0,0.953,0.905	-0.874
ENSG00000124486	USP9X	X	+	41060312	41060533	41057780	41058003	41064555	41064746	2,1,1	44,64,32	5,8,10	0,2,0	172	86	9.99201e-16	7.6312e-14	0.022,0.008,0.015	1.0,0.667,1.0	-0.874
ENSG00000167978	SRRM2	16	+	2808985	2809048	2808470	2808548	2809140	2809173	7,11,10	55,44,58	7,7,12	0,0,1	41	11	1.31006e-14	9.19319e-13	0.033,0.063,0.044	1.0,1.0,0.763	-0.874
ENSG00000168291	PDHB	3	-	58414199	58414341	58413356	58413906	58415434	58415526	3,3,1	23,19,11	11,8,8	0,0,1	171	85	3.72047e-12	2.05026e-10	0.061,0.073,0.043	1.0,1.0,0.799	-0.874
ENSG00000106089	STX1A	7	-	73123374	73123452	73122918	73123018	73133931	73133988	2,3,5	79,83,45	5,5,1	0,1,0	106	50	1.32184e-11	6.89663e-10	0.012,0.017,0.05	1.0,0.702,1.0	-0.874
ENSG00000094880	CDC23	5	-	137548679	137548752	137542235	137542373	137548840	137548904	2,2,2	15,19,22	4,6,7	0,0,1	103	57	9.20274e-10	3.92339e-08	0.069,0.055,0.048	1.0,1.0,0.795	-0.874
ENSG00000196367	TRRAP	7	+	98555603	98555714	98554021	98554156	98556966	98557113	1,1,1	10,12,12	6,1,6	1,0,0	172	86	7.76367e-07	2.23309e-05	0.048,0.04,0.04	0.75,1.0,1.0	-0.874
ENSG00000115970	THADA	2	-	43804160	43804373	43801474	43802166	43805651	43805746	0,1,2	11,18,9	6,2,3	1,0,0	172	86	9.58276e-07	2.71307e-05	0.0,0.027,0.1	0.75,1.0,1.0	-0.874
ENSG00000150961	SEC24D	4	-	119660303	119660442	119659415	119659534	119661817	119661963	1,1,1	62,42,37	11,10,15	0,0,4	172	86	0	0	0.008,0.012,0.013	1.0,1.0,0.652	-0.873
ENSG00000110274	CEP164	11	+	117233119	117233254	117232550	117232709	117241795	117242182	3,4,2	18,11,19	18,20,14	1,0,0	172	86	0	0	0.077,0.154,0.05	0.9,1.0,1.0	-0.873
ENSG00000113360	DROSHA	5	-	31409356	31409439	31409162	31409266	31410852	31410994	0,0,4	16,8,19	11,11,13	1,1,0	152	86	1.3034e-13	8.3466e-12	0.0,0.0,0.106	0.862,0.862,1.0	-0.873
ENSG00000157110	RBPMS	8	+	30423773	30423877	30416403	30416473	30428153	30428278	0,1,3	18,20,15	5,6,8	0,1,0	149	63	2.73917e-10	1.24088e-08	0.0,0.021,0.078	1.0,0.717,1.0	-0.873
ENSG00000103657	HERC1	15	-	63924907	63925010	63922718	63922834	63926046	63926169	0,1,1	22,8,13	10,5,3	2,0,0	172	86	8.27916e-09	3.1365e-07	0.0,0.059,0.037	0.714,1.0,1.0	-0.873
ENSG00000136717	BIN1	2	-	127808377	127808488	127807996	127808098	127816586	127816731	0,0,1	1,3,2	5,9,6	0,1,0	172	86	0.00213209	0.029762	0.0,0.0,0.2	1.0,0.818,1.0	-0.873
ENSG00000004961	HCCS	X	+	11139026	11139113	11136620	11136740	11139731	11139999	6,13,4	121,154,97	8,16,5	1,1,0	160	86	0	0	0.026,0.043,0.022	0.811,0.896,1.0	-0.872
ENSG00000166226	CCT2	12	+	69992101	69992201	69991747	69991851	69993642	69993784	351363322	146719081441	157016781657	23,31,22	172	86	0	0	0.107,0.087,0.1	0.972,0.964,0.974	-0.872
ENSG00000175063	UBE2C	20	+	44444179	44444384	44441214	44441435	44444492	44444552	9,8,9	32,40,31	28,20,20	0,0,1	139	53	0	0	0.097,0.071,0.1	1.0,1.0,0.884	-0.872
ENSG00000153187	HNRNPU	1	-	245018274	245018346	245016689	245017805	245018725	245018910	17,11,5	47,60,58	61,106,64	0,2,0	130	86	0	0	0.193,0.108,0.054	1.0,0.972,1.0	-0.872
ENSG00000113360	DROSHA	5	-	31531556	31531632	31530904	31531031	31532096	31532216	4,4,1	20,13,31	16,12,15	1,0,0	138	86	0	0	0.111,0.161,0.02	0.909,1.0,1.0	-0.872
ENSG00000130227	XPO7	8	+	21829386	21829452	21827654	21827821	21832180	21832285	2,1,4	22,15,29	7,5,6	0,0,1	118	86	1.3578e-10	6.39539e-09	0.062,0.046,0.091	1.0,1.0,0.814	-0.872
ENSG00000161618	ALDH16A1	19	+	49967383	49967520	49967110	49967206	49967673	49967779	1,1,0	5,11,6	6,9,5	1,0,0	172	86	4.31577e-07	1.29305e-05	0.091,0.043,0.0	0.75,1.0,1.0	-0.872
ENSG00000198728	LDB1	10	-	103870285	103870458	103869677	103869800	103870625	103870728	15,12,6	71,68,68	10,11,12	1,0,0	172	86	0	0	0.096,0.081,0.042	0.833,1.0,1.0	-0.871
ENSG00000113649	TCERG1	5	+	145860712	145860763	145859590	145859657	145862154	145862290	2,0,0	19,17,13	20,23,24	3,3,1	62	60	0	0	0.092,0.0,0.0	0.866,0.881,0.959	-0.871
ENSG00000108773	KAT2A	17	-	40272047	40272137	40271554	40271736	40272242	40272388	2,1,3	18,12,8	16,13,12	0,1,0	166	86	1.62093e-13	1.0311e-11	0.054,0.041,0.163	1.0,0.871,1.0	-0.871
ENSG00000136436	CALCOCO2	17	+	46930287	46930374	46929867	46929990	46933453	46933549	1,4,0	29,40,36	8,8,3	2,0,0	160	86	2.57683e-12	1.44173e-10	0.018,0.051,0.0	0.683,1.0,1.0	-0.871
ENSG00000007202	KIAA0100	17	-	26960566	26960769	26959066	26959257	26961534	26962129	1,11,4	67,93,49	5,5,4	0,1,0	172	86	2.96618e-12	1.64772e-10	0.007,0.056,0.039	1.0,0.714,1.0	-0.871
ENSG00000060749	QSER1	11	+	32996793	32996889	32994942	32995095	32997879	32997999	7,4,2	63,67,49	6,3,5	0,0,1	172	86	5.16953e-12	2.80779e-10	0.053,0.029,0.02	1.0,1.0,0.714	-0.871
ENSG00000150457	LATS2	13	-	21553829	21553936	21549008	21549503	21557362	21557945	3,3,1	51,27,28	5,6,4	1,0,0	172	86	2.47313e-11	1.24495e-09	0.029,0.053,0.018	0.714,1.0,1.0	-0.871
ENSG00000162923	WDR26	1	-	224619383	224619483	224619226	224619283	224621385	224621807	3,0,1	19,28,19	6,5,8	1,0,0	136	50	2.78287e-11	1.39298e-09	0.055,0.0,0.019	0.688,1.0,1.0	-0.871
ENSG00000007202	KIAA0100	17	-	26942681	26942816	26941895	26942264	26943113	26943215	5,6,6	40,44,41	8,18,5	1,0,0	172	86	1.11022e-16	9.06291e-15	0.059,0.064,0.068	0.8,1.0,1.0	-0.87
ENSG00000157800	SLC37A3	7	-	140051861	140051946	140037083	140037149	140055467	140055564	4,0,1	9,8,18	5,9,6	0,1,0	129	59	2.81188e-08	9.93319e-07	0.169,0.0,0.025	1.0,0.805,1.0	-0.87
ENSG00000048028	USP28	11	-	113704970	113705057	113704141	113704279	113711319	113711479	2,1,1	11,8,18	1,7,7	0,1,0	160	86	1.29287e-07	4.14279e-06	0.089,0.063,0.029	1.0,0.79,1.0	-0.87
ENSG00000168476	REEP4	8	-	21996438	21996574	21996151	21996306	21997475	21997596	0,0,2	6,5,5	7,8,6	1,0,0	172	86	5.7369e-06	0.000142749	0.0,0.0,0.167	0.778,1.0,1.0	-0.87
ENSG00000011243	AKAP8L	19	-	15514820	15514853	15511960	15512414	15521330	15521405	1,2,0	23,20,23	1,3,1	0,1,0	34	68	9.59593e-05	0.00186799	0.08,0.167,0.0	1.0,0.857,1.0	-0.87
ENSG00000150556	LYPD6B	2	+	150064827	150064926	150061766	150061918	150069505	150069636	14,18,9	94,65,54	14,16,15	1,0,0	172	86	0	0	0.069,0.122,0.077	0.875,1.0,1.0	-0.869
ENSG00000198836	OPA1	3	+	193365858	193365923	193364853	193364969	193366583	193366660	1,1,1	29,26,33	10,13,6	0,0,2	100	70	9.32587e-15	6.62648e-13	0.024,0.026,0.021	1.0,1.0,0.677	-0.869
ENSG00000198730	CTR9	11	+	10796753	10796850	10795558	10795716	10797067	10797180	1,1,6	18,17,10	17,12,10	1,0,0	172	86	7.16871e-13	4.23952e-11	0.027,0.029,0.231	0.895,1.0,1.0	-0.869
ENSG00000144824	PHLDB2	3	+	111671418	111671559	111659381	111659492	111672776	111672876	1,4,1	8,17,10	9,13,11	1,0,0	172	86	3.93798e-11	1.94074e-09	0.059,0.105,0.048	0.818,1.0,1.0	-0.869
ENSG00000124486	USP9X	X	+	40999908	41000024	40996056	40996275	41000218	41000470	1,3,3	12,10,15	13,6,3	1,0,0	172	86	5.24367e-09	2.0304e-07	0.04,0.13,0.091	0.867,1.0,1.0	-0.869
ENSG00000168310	IRF2	4	-	185329311	185329429	185320068	185320233	185339685	185339862	2,1,0	18,9,16	5,6,5	0,0,1	172	86	1.28245e-08	4.74725e-07	0.053,0.053,0.0	1.0,1.0,0.714	-0.869
ENSG00000115761	NOL10	2	-	10794606	10794673	10747310	10747437	10797867	10798017	0,1,1	8,8,7	6,13,10	0,0,2	120	86	1.85099e-08	6.71208e-07	0.0,0.082,0.093	1.0,1.0,0.782	-0.869
ENSG00000135164	DMTF1	7	+	86810624	86810657	86808860	86809018	86811543	86811653	1,4,2	54,47,42	3,2,1	1,0,0	52	86	1.03262e-06	2.9031e-05	0.03,0.123,0.073	0.832,1.0,1.0	-0.869
ENSG00000091140	DLD	7	+	107533644	107533723	107531617	107531734	107543922	107543992	6,12,11	140139101	7,5,9	0,1,0	121	63	0	0	0.022,0.043,0.054	1.0,0.722,1.0	-0.868
ENSG00000153071	DAB2	5	-	39388406	39388469	39382719	39383373	39388900	39388954	24,24,38	158154124	482505480	4,2,10	73	47	0	0	0.089,0.091,0.165	0.987,0.994,0.969	-0.868
ENSG00000060688	SNRNP40	1	-	31740717	31740779	31734375	31734479	31742004	31742087	1,0,0	15,9,19	8,12,11	2,1,0	100	76	8.3844e-13	4.93269e-11	0.048,0.0,0.0	0.752,0.901,1.0	-0.868
ENSG00000168724	DNAJC21	5	+	34941200	34941288	34938962	34939114	34944971	34945130	4,2,2	13,18,19	10,11,7	0,1,0	162	86	4.06253e-12	2.22595e-10	0.14,0.056,0.053	1.0,0.854,1.0	-0.868
ENSG00000115207	GTF3C2	2	-	27556840	27556866	27556521	27556651	27558464	27558573	3,1,2	46,63,50	5,5,3	0,2,0	38	86	1.00386e-11	5.29754e-10	0.129,0.035,0.083	1.0,0.85,1.0	-0.868
ENSG00000103591	AAGAB	15	-	67495885	67495935	67494044	67495236	67496381	67496486	3,4,5	82100111	12,9,9	0,2,1	86	86	0	0	0.035,0.038,0.043	1.0,0.818,0.9	-0.867
ENSG00000088930	XRN2	20	+	21337223	21337303	21336717	21336815	21346058	21346127	5,2,4	30,16,19	10,10,13	1,0,0	122	62	1.92069e-14	1.3254e-12	0.078,0.06,0.097	0.836,1.0,1.0	-0.867
ENSG00000135945	REV1	2	-	100052295	100052403	100050793	100050910	100055062	100055772	0,0,0	22,26,17	3,2,1	1,0,0	172	86	6.12789e-07	1.79199e-05	0.0,0.0,0.0	0.6,1.0,1.0	-0.867
ENSG00000164535	DAGLB	7	-	6464382	6464466	6461357	6461435	6465618	6465745	3,0,0	6,6,10	8,4,6	1,0,0	139	71	2.76851e-06	7.24961e-05	0.203,0.0,0.0	0.803,1.0,1.0	-0.867
ENSG00000231889	TRAF3IP2-AS1	6	+	111805946	111806064	111804764	111804868	111824498	111824811	0,1,0	6,2,2	7,14,16	0,0,2	172	86	1.37029e-05	0.00031891	0.0,0.2,0.0	1.0,1.0,0.8	-0.867
ENSG00000178295	GEN1	2	+	17952462	17952554	17947845	17947956	17953900	17954051	1,2,0	7,11,5	3,4,6	0,0,1	170	86	1.60911e-05	0.000369109	0.067,0.084,0.0	1.0,1.0,0.752	-0.867
ENSG00000198176	TFDP1	13	+	114292132	114292211	114290291	114290443	114294434	114295504	3,5,0	12,17,14	8,16,12	0,0,1	144	86	1.5512e-12	8.84186e-11	0.13,0.149,0.0	1.0,1.0,0.878	-0.866
ENSG00000113838	TBCCD1	3	-	186272042	186272540	186268917	186269068	186272686	186272873	0,2,2	22,26,31	4,3,6	1,0,0	172	86	1.40451e-09	5.84568e-08	0.0,0.037,0.031	0.667,1.0,1.0	-0.866
ENSG00000198612	COPS8	2	+	237995769	237995840	237994585	237994685	237997247	237997296	3,4,3	22,42,34	6,6,1	1,0,0	84	42	1.90883e-09	7.80639e-08	0.064,0.045,0.042	0.75,1.0,1.0	-0.866
ENSG00000007168	PAFAH1B1	17	+	2568665	2568750	2541392	2541614	2569309	2569384	0,1,2	6,4,5	18,22,14	0,0,1	138	68	2.99727e-09	1.19629e-07	0.0,0.11,0.165	1.0,1.0,0.873	-0.866
ENSG00000168397	ATG4B	2	+	242610726	242610820	242606059	242606253	242611605	242613264	1,2,2	39,40,31	4,3,1	1,0,0	172	86	2.55298e-08	9.07268e-07	0.013,0.024,0.031	0.667,1.0,1.0	-0.866
ENSG00000165819	METTL3	14	-	21967907	21967946	21967168	21967744	21968636	21968824	0,1,0	6,2,3	11,16,11	0,0,0	64	86	6.8953e-06	0.000169306	0.0,0.402,0.0	1.0,1.0,1.0	-0.866
ENSG00000130779	CLIP1	12	-	122821178	122821295	122819194	122819252	122825299	122826244	0,0,0	10,4,4	4,3,4	1,0,0	137	51	0.000364756	0.00621003	0.0,0.0,0.0	0.598,1.0,1.0	-0.866
ENSG00000159352	PSMD4	1	+	151238479	151238588	151227178	151227284	151238783	151238915	11,10,13	172146113	10,13,12	2,0,0	172	86	0	0	0.031,0.033,0.054	0.714,1.0,1.0	-0.865
ENSG00000104549	SQLE	8	+	126033025	126033113	126030872	126030969	126033994	126034435	10,11,7	65,83,71	7,11,13	1,0,0	162	86	0	0	0.076,0.066,0.05	0.788,1.0,1.0	-0.865
ENSG00000079332	SAR1A	10	-	71921613	71921687	71920759	71920825	71930168	71930253	28,41,19	273294220	13,12,10	0,2,0	99	51	0	0	0.05,0.067,0.043	1.0,0.756,1.0	-0.865
ENSG00000157827	FMNL2	2	+	153476022	153476232	153475359	153475672	153481951	153482076	1,5,1	6,9,7	37,32,45	0,0,1	172	86	1.44329e-15	1.09024e-13	0.077,0.217,0.067	1.0,1.0,0.957	-0.865
ENSG00000057757	PITHD1	1	+	24112804	24112913	24112164	24112269	24113764	24114722	1,1,0	13,10,13	11,10,6	1,1,0	172	86	2.0087e-11	1.02358e-09	0.037,0.048,0.0	0.846,0.833,1.0	-0.865
ENSG00000089195	TRMT6	20	-	5921888	5921991	5921698	5921785	5922596	5922682	1,3,1	7,10,10	15,11,10	0,0,1	159	73	2.79671e-10	1.2651e-08	0.062,0.121,0.044	1.0,1.0,0.821	-0.865
ENSG00000080815	PSEN1	14	+	73614674	73614802	73614502	73614584	73637504	73637702	0,0,1	3,6,4	3,5,7	0,1,0	161	75	0.000135825	0.0025592	0.0,0.0,0.104	1.0,0.7,1.0	-0.865
ENSG00000126602	TRAP1	16	-	3721722	3721792	3715971	3716119	3724339	3724495	9,6,6	42,51,61	24,24,16	1,0,1	126	86	0	0	0.128,0.074,0.063	0.942,1.0,0.916	-0.864
ENSG00000130935	NOL11	17	+	65732781	65732870	65732015	65732139	65733186	65733261	4,5,3	41,46,26	10,22,10	1,1,0	146	68	0	0	0.043,0.048,0.051	0.823,0.911,1.0	-0.864
ENSG00000138073	PREB	2	-	27354539	27354699	27353632	27354376	27355470	27355595	3,7,9	57,42,38	5,7,8	0,0,1	172	86	5.56444e-13	3.33513e-11	0.026,0.077,0.106	1.0,1.0,0.8	-0.864
ENSG00000073578	SDHA	5	+	251106	251158	240558	240591	256448	256797	2,3,2	11,17,10	9,12,13	0,0,1	45	26	3.64997e-12	2.0123e-10	0.095,0.093,0.104	1.0,1.0,0.883	-0.864
ENSG00000119689	DLST	14	+	75349293	75349327	75348627	75348719	75355977	75356052	1,10,2	50,68,65	5,5,4	0,1,0	35	67	1.36116e-11	7.08689e-10	0.037,0.22,0.056	1.0,0.905,1.0	-0.864
ENSG00000105835	NAMPT	7	-	105917468	105917625	105912975	105913104	105925273	105925397	5,3,6	22,17,33	7,3,12	0,0,1	172	86	3.98508e-11	1.96318e-09	0.102,0.081,0.083	1.0,1.0,0.857	-0.864
ENSG00000117625	RCOR3	1	+	211469017	211469095	211462519	211462738	211486765	211486816	3,2,0	43,54,33	4,4,2	0,1,0	100	44	6.45889e-10	2.80549e-08	0.03,0.016,0.0	1.0,0.638,1.0	-0.864
ENSG00000122085	MTERFD2	2	-	242029394	242029459	242028639	242028780	242041667	242041726	2,1,0	9,14,14	2,5,4	0,1,0	82	52	1.69072e-06	4.58551e-05	0.124,0.043,0.0	1.0,0.76,1.0	-0.864
ENSG00000003756	RBM5	3	+	50141680	50141741	50139769	50140599	50142509	50142575	0,0,0	15,9,11	3,6,2	0,0,1	81	59	1.46277e-05	0.000338596	0.0,0.0,0.0	1.0,1.0,0.593	-0.864
ENSG00000079785	DDX1	2	+	15768761	15768834	15768568	15768641	15769725	15769821	4,6,1	66,55,38	13,16,13	0,1,2	112	66	0	0	0.034,0.06,0.015	1.0,0.904,0.793	-0.863
ENSG00000105993	DNAJB6	7	+	157159195	157159255	157155854	157155964	157160066	157160177	6,7,2	391429311	8,2,4	0,1,0	106	86	0	0	0.012,0.013,0.005	1.0,0.619,1.0	-0.863
ENSG00000078668	VDAC3	8	+	42262384	42262442	42260828	42260979	42262888	42263411	6,6,6	548616506	22,19,8	2,3,1	102	86	0	0	0.009,0.008,0.01	0.903,0.842,0.871	-0.863
ENSG00000111530	CAND1	12	+	67698384	67698526	67696102	67696395	67698883	67699092	6,2,3	24,16,14	13,13,12	0,0,1	172	86	2.07612e-14	1.43107e-12	0.111,0.059,0.097	1.0,1.0,0.857	-0.863
ENSG00000138073	PREB	2	-	27355097	27355271	27353632	27354376	27355470	27355595	6,9,1	57,42,38	12,6,6	0,0,1	172	86	2.90878e-14	1.98633e-12	0.05,0.097,0.013	1.0,1.0,0.75	-0.863
ENSG00000082701	GSK3B	3	-	119720892	119721086	119666114	119666198	119812193	119812637	4,4,2	34,59,32	12,5,5	0,0,1	163	77	1.22902e-13	7.89463e-12	0.053,0.031,0.029	1.0,1.0,0.703	-0.863
ENSG00000087263	OGFOD1	16	+	56500787	56500879	56500108	56500180	56501076	56501205	0,2,0	12,18,18	8,5,4	0,0,1	149	65	4.12187e-09	1.61971e-07	0.0,0.046,0.0	1.0,1.0,0.636	-0.863
ENSG00000213782	DDX47	12	+	12976803	12976950	12976136	12976253	12977473	12977611	21,13,16	83,63,80	8,4,15	0,0,1	172	86	7.77156e-16	5.9905e-14	0.112,0.094,0.091	1.0,1.0,0.882	-0.862
ENSG00000138231	DBR1	3	-	137882619	137882700	137882190	137882336	137885922	137886147	3,1,2	69,74,71	4,6,3	0,0,1	148	86	5.12146e-13	3.08746e-11	0.025,0.008,0.016	1.0,1.0,0.635	-0.862
ENSG00000020426	MNAT1	14	+	61264804	61264878	61262934	61263087	61275042	61275146	0,6,2	14,19,8	7,13,5	0,1,0	134	86	1.25392e-09	5.25582e-08	0.0,0.169,0.138	1.0,0.893,1.0	-0.862
ENSG00000141522	ARHGDIA	17	-	79827417	79827501	79827205	79827282	79827616	79827833	36,27,32	137,111,95	44,37,37	1,0,0	138	70	0	0	0.118,0.11,0.146	0.957,1.0,1.0	-0.861
ENSG00000086758	HUWE1	X	-	53565795	53566041	53565297	53565415	53566617	53566773	4,5,3	45,31,37	17,14,12	3,0,0	172	86	0	0	0.043,0.075,0.039	0.739,1.0,1.0	-0.861
ENSG00000197933	ZNF823	19	-	11835008	11835069	11832807	11834157	11836015	11836142	8,3,5	40,41,33	25,34,24	1,2,0	108	86	0	0	0.137,0.055,0.108	0.952,0.931,1.0	-0.861
ENSG00000151503	NCAPD3	11	-	134079038	134079100	134078764	134078845	134079206	134079371	0,0,0	23,26,26	5,5,5	0,1,1	98	74	2.75346e-12	1.53779e-10	0.0,0.0,0.0	1.0,0.791,0.791	-0.861
ENSG00000112078	KCTD20	6	+	36442565	36442839	36437828	36438034	36452490	36452601	10,13,9	66,73,66	8,3,1	1,0,0	172	86	3.48056e-09	1.3799e-07	0.07,0.082,0.064	0.8,1.0,1.0	-0.861
ENSG00000166783	KIAA0430	16	-	15710908	15711028	15709686	15709862	15711155	15711392	0,0,1	31,29,28	1,2,3	0,0,1	172	86	1.89087e-07	5.9412e-06	0.0,0.0,0.018	1.0,1.0,0.6	-0.861
ENSG00000155816	FMN2	1	+	240555810	240555862	240519115	240519208	240601360	240601510	1,0,2	12,18,8	5,1,6	0,0,1	90	86	9.61023e-07	2.71961e-05	0.074,0.0,0.193	1.0,1.0,0.851	-0.861
ENSG00000110367	DDX6	11	-	118629482	118629611	118627879	118627996	118630630	118630753	23,24,27	115125111	11,13,11	0,1,0	172	86	0	0	0.091,0.088,0.108	1.0,0.867,1.0	-0.86
ENSG00000138430	OLA1	2	-	174943695	174943818	174937174	174940255	175087760	175087888	4,4,2	68,70,61	14,14,17	2,1,0	172	86	0	0	0.029,0.028,0.016	0.778,0.875,1.0	-0.86
ENSG00000141551	CSNK1D	17	-	80223561	80223672	80213304	80213453	80231181	80231244	7,11,12	66,79,49	11,13,8	0,0,1	142	56	0	0	0.04,0.052,0.088	1.0,1.0,0.759	-0.86
ENSG00000119285	HEATR1	1	-	236717897	236718052	236716880	236717039	236718595	236718764	4,3,7	36,37,24	8,11,12	1,0,0	172	86	1.55431e-15	1.16914e-13	0.053,0.039,0.127	0.8,1.0,1.0	-0.86
ENSG00000071655	MBD3	19	-	1582620	1582711	1578333	1578537	1584538	1584676	14,4,7	71,51,35	8,4,5	1,0,0	168	86	2.25754e-11	1.14289e-09	0.092,0.039,0.093	0.804,1.0,1.0	-0.86
ENSG00000139263	LRIG3	12	-	59277301	59277373	59276650	59276814	59279612	59279684	1,3,6	111,105,89	4,2,3	0,0,1	109	65	2.98318e-11	1.48905e-09	0.005,0.017,0.039	1.0,1.0,0.641	-0.86
ENSG00000114982	KANSL3	2	-	97269986	97270117	97268489	97268599	97270515	97270600	1,1,0	5,6,6	2,3,6	0,0,1	164	78	0.000187849	0.00342436	0.087,0.073,0.0	1.0,1.0,0.741	-0.86
ENSG00000078747	ITCH	20	+	33077070	33077191	33068870	33069011	33077626	33077731	11,7,4	37,36,31	17,12,14	0,1,0	172	86	0	0	0.129,0.089,0.061	1.0,0.857,1.0	-0.859
ENSG00000133103	COG6	13	+	40253674	40253757	40251604	40251716	40254111	40254182	0,0,0	39,50,43	6,10,3	1,1,0	130	64	0	0	0.0,0.0,0.0	0.747,0.831,1.0	-0.859
ENSG00000102241	HTATSF1	X	+	135582316	135582364	135581756	135581937	135582822	135582977	5,5,11	170171149	7,8,15	3,0,0	82	86	0	0	0.03,0.03,0.072	0.71,1.0,1.0	-0.859
ENSG00000132823	C20orf111	20	-	42831600	42831714	42825135	42826379	42839335	42839431	7,5,7	44,40,36	6,8,6	0,1,0	172	86	3.93785e-12	2.1624e-10	0.074,0.059,0.089	1.0,0.8,1.0	-0.859
ENSG00000102531	FNDC3A	13	+	49741379	49741439	49719913	49720071	49742748	49742887	1,5,4	34,44,37	2,3,4	0,0,1	106	86	7.6752e-08	2.55269e-06	0.023,0.084,0.081	1.0,1.0,0.764	-0.859
ENSG00000137955	RABGGTB	1	+	76252384	76252482	76251912	76251959	76253181	76253289	1,1,0	6,3,3	27,12,15	1,0,1	126	40	1.24418e-07	3.99703e-06	0.05,0.096,0.0	0.896,1.0,0.826	-0.859
ENSG00000180891	CUEDC1	17	-	55946482	55946554	55945510	55945604	55948646	55948730	1,2,0	5,6,3	10,14,11	1,0,0	121	77	4.46948e-07	1.33717e-05	0.113,0.175,0.0	0.864,1.0,1.0	-0.859
ENSG00000060339	CCAR1	10	+	70500385	70500418	70496632	70496805	70502132	70502326	1,0,0	7,4,5	4,1,4	0,0,2	52	86	0.00152654	0.0222005	0.191,0.0,0.0	1.0,1.0,0.768	-0.859
ENSG00000196235	SUPT5H	19	+	39957314	39957385	39957119	39957209	39959395	39959501	5,3,3	51,52,49	14,31,12	2,0,1	125	83	0	0	0.061,0.037,0.039	0.823,1.0,0.888	-0.858
ENSG00000136518	ACTL6A	3	+	179298927	179299008	179298681	179298796	179301140	179301236	11,10,2	35,34,51	15,22,15	0,0,1	148	86	0	0	0.154,0.146,0.022	1.0,1.0,0.897	-0.858
ENSG00000151414	NEK7	1	+	198247090	198247199	198233254	198233365	198248083	198248191	13,9,6	42,46,32	15,9,17	1,0,0	172	86	0	0	0.134,0.089,0.086	0.882,1.0,1.0	-0.858
ENSG00000215021	PHB2	12	-	7077573	7077750	7076909	7077184	7079358	7079443	13,10,13	57,54,37	13,11,18	0,0,1	164	78	0	0	0.098,0.081,0.143	1.0,1.0,0.895	-0.858
ENSG00000068912	ERLEC1	2	+	54023069	54023150	54021481	54021586	54024651	54024729	10,7,5	33,47,47	10,22,17	1,0,0	133	71	0	0	0.139,0.074,0.054	0.842,1.0,1.0	-0.858
ENSG00000079308	TNS1	2	-	218765185	218765235	218762520	218762692	218771057	218771108	7,3,5	59,42,54	10,4,3	2,0,0	44	44	4.6152e-12	2.51769e-10	0.106,0.067,0.085	0.833,1.0,1.0	-0.858
ENSG00000103194	USP10	16	+	84796594	84796694	84778238	84779279	84797691	84797869	5,15,15	58,57,66	3,5,10	0,0,1	172	86	1.85719e-11	9.5065e-10	0.041,0.116,0.102	1.0,1.0,0.833	-0.858
ENSG00000085449	WDFY1	2	-	224760220	224760347	224749364	224749466	224763674	224763787	5,2,4	19,30,19	6,6,9	0,0,1	172	86	6.0512e-11	2.93342e-09	0.116,0.032,0.095	1.0,1.0,0.818	-0.858
ENSG00000144283	PKP4	2	+	159497138	159497271	159490581	159490801	159498997	159499211	1,1,0	8,14,7	8,4,5	0,1,0	172	86	4.24665e-07	1.27326e-05	0.059,0.034,0.0	1.0,0.667,1.0	-0.858
ENSG00000159217	IGF2BP1	17	+	47123621	47123735	47123251	47123383	47126713	47126806	2,6,8	149146125	17,25,16	3,0,1	172	86	0	0	0.007,0.02,0.031	0.739,1.0,0.889	-0.857
ENSG00000149480	MTA2	11	-	62363929	62364004	62363750	62363809	62364108	62364297	17,13,12	65,67,101	6,14,10	0,0,1	102	52	0	0	0.118,0.09,0.057	1.0,1.0,0.836	-0.857
ENSG00000143436	MRPL9	1	-	151734588	151734631	151733349	151733375	151734851	151734976	3,4,5	27,58,44	11,5,12	1,0,1	36	19	0	0	0.055,0.035,0.057	0.853,1.0,0.864	-0.857
ENSG00000164754	RAD21	8	-	117875368	117875498	117870590	117870697	117878824	117879000	9,15,9	89,74,108	22,10,13	1,1,0	172	86	0	0	0.048,0.092,0.04	0.917,0.833,1.0	-0.857
ENSG00000091140	DLD	7	+	107545805	107545949	107545402	107545503	107546711	107546813	16,15,11	89,82,80	16,14,14	2,0,0	172	86	0	0	0.082,0.084,0.064	0.8,1.0,1.0	-0.857
ENSG00000134057	CCNB1	5	+	68473117	68473176	68471223	68471364	68473350	68473527	6,5,12	254276248	53,30,45	2,6,5	104	86	0	0	0.019,0.015,0.038	0.956,0.805,0.882	-0.857
ENSG00000175197	DDIT3	12	-	57911051	57911378	57910371	57910963	57911488	57911536	29,21,17	104,108,77	6,11,9	0,1,0	127	41	2.53131e-14	1.73618e-12	0.083,0.059,0.067	1.0,0.78,1.0	-0.857
ENSG00000182149	IST1	16	+	71957190	71957283	71956376	71956583	71961516	71961876	4,3,1	79,66,61	11,14,14	1,0,2	172	86	0	0	0.025,0.022,0.008	0.846,1.0,0.778	-0.856
ENSG00000162614	NEXN	1	+	78383644	78383723	78381739	78381818	78383809	78383958	11,14,9	200203190	22,7,13	0,2,0	130	72	0	0	0.03,0.037,0.026	1.0,0.66,1.0	-0.856
ENSG00000169967	MAP3K2	2	-	128087967	128088081	128087496	128087584	128093445	128093545	3,4,0	121140121	6,4,6	0,0,2	167	81	2.22045e-16	1.78565e-14	0.012,0.014,0.0	1.0,1.0,0.593	-0.856
ENSG00000153827	TRIP12	2	-	230668286	230668405	230666967	230667175	230668714	230668943	5,3,4	24,18,23	9,7,8	1,0,0	172	86	2.27863e-11	1.15263e-09	0.094,0.077,0.08	0.818,1.0,1.0	-0.856
ENSG00000168397	ATG4B	2	+	242610726	242610856	242606059	242606253	242611605	242612043	0,2,5	39,40,31	4,4,2	1,0,0	172	86	8.38642e-09	3.17618e-07	0.0,0.024,0.075	0.667,1.0,1.0	-0.856
ENSG00000138614	C15orf44	15	-	65883935	65884069	65877107	65877226	65888070	65888163	2,3,1	24,19,15	3,5,4	0,1,0	172	86	1.25447e-07	4.02699e-06	0.04,0.073,0.032	1.0,0.714,1.0	-0.856
ENSG00000161533	ACOX1	17	-	73969705	73969866	73953539	73953647	73974614	73974774	0,3,0	2,5,3	21,22,15	0,1,1	172	86	1.75553e-06	4.75376e-05	0.0,0.231,0.0	1.0,0.917,0.882	-0.856
ENSG00000113013	HSPA9	5	-	137893557	137893675	137893090	137893185	137894241	137894320	29,30,30	75,98,70	56,39,45	0,0,0	158	72	0	0	0.15,0.122,0.163	1.0,1.0,1.0	-0.855
ENSG00000178127	NDUFV2	18	+	9119323	9119386	9117835	9117901	9119471	9119588	10,11,16	132117139	13,19,11	2,1,0	85	59	0	0	0.05,0.061,0.074	0.819,0.93,1.0	-0.855
ENSG00000116406	EDEM3	1	-	184718680	184718726	184706744	184706845	184723622	184723701	1,3,2	19,16,16	16,5,10	0,0,1	64	72	7.76046e-14	5.09001e-12	0.056,0.174,0.123	1.0,1.0,0.918	-0.855
ENSG00000007202	KIAA0100	17	-	26959959	26960180	26959066	26959257	26961534	26962129	5,5,4	67,93,49	3,4,3	0,1,0	172	86	6.16268e-10	2.6862e-08	0.036,0.026,0.039	1.0,0.667,1.0	-0.855
ENSG00000127527	EPS15L1	19	-	16528758	16528915	16528362	16528448	16532129	16532287	3,6,0	18,19,12	8,7,7	0,1,0	165	79	2.7734e-09	1.11301e-07	0.074,0.131,0.0	1.0,0.77,1.0	-0.855
ENSG00000012660	ELOVL5	6	-	53135390	53135525	53132196	53134068	53138017	53138142	1,2,1	49,58,51	7,3,8	0,1,0	172	86	8.04912e-14	5.26824e-12	0.01,0.017,0.01	1.0,0.6,1.0	-0.854
ENSG00000175470	PPP2R2D	10	+	133754085	133754345	133753662	133753700	133757471	133757649	17,13,15	53,62,55	10,7,12	0,0,1	117	31	1.64091e-13	1.04168e-11	0.078,0.053,0.067	1.0,1.0,0.761	-0.854
ENSG00000106617	PRKAG2	7	-	151271976	151272035	151269749	151269795	151273456	151273538	1,1,3	22,20,14	12,9,6	0,2,0	46	28	1.91483e-11	9.78949e-10	0.027,0.03,0.115	1.0,0.733,1.0	-0.854
ENSG00000138297	TIMM23	10	-	51610392	51610451	51606987	51607098	51623108	51623360	2,3,3	115,99,99	4,3,2	0,0,1	104	86	3.65915e-11	1.81049e-09	0.014,0.024,0.024	1.0,1.0,0.623	-0.854
ENSG00000153037	SRP19	5	+	112200153	112200225	112198058	112198280	112200317	112200429	0,0,10	23,12,15	7,11,10	0,0,1	130	86	1.54219e-09	6.39096e-08	0.0,0.0,0.306	1.0,1.0,0.869	-0.854
ENSG00000106615	RHEB	7	-	151174418	151174501	151168634	151168691	151181822	151181890	19,26,35	61,63,58	20,22,27	0,0,1	91	25	0	0	0.079,0.102,0.142	1.0,1.0,0.881	-0.853
ENSG00000179950	PUF60	8	-	144903766	144903856	144900542	144900704	144903987	144904083	8,5,6	142134114	8,15,10	0,0,3	166	86	0	0	0.028,0.019,0.027	1.0,1.0,0.633	-0.853
ENSG00000172757	CFL1	11	-	65623124	65623201	65622479	65622919	65623405	65623713	294260224	146413401125	234259235	5,9,4	140	86	0	0	0.11,0.106,0.109	0.966,0.946,0.973	-0.853
ENSG00000136152	COG3	13	+	46104816	46104915	46103925	46104053	46108836	46110765	6,7,8	36,30,24	15,7,10	1,0,0	172	86	9.54792e-15	6.77652e-13	0.077,0.104,0.143	0.882,1.0,1.0	-0.853
ENSG00000198408	MGEA5	10	-	103573311	103573363	103572786	103572884	103577580	103577623	1,4,0	24,25,23	8,13,6	1,2,0	45	36	4.04121e-14	2.72526e-12	0.032,0.113,0.0	0.865,0.839,1.0	-0.853
ENSG00000113658	SMAD5	5	+	135496544	135496796	135489280	135489852	135498960	135499080	12,7,2	67,70,38	5,6,6	1,0,0	172	86	1.26317e-11	6.60909e-10	0.082,0.048,0.026	0.714,1.0,1.0	-0.853
ENSG00000198887	SMC5	9	+	72965291	72965387	72965029	72965209	72967106	72969804	1,2,1	43,54,39	6,2,4	2,0,0	172	86	2.97385e-10	1.33988e-08	0.011,0.018,0.013	0.6,1.0,1.0	-0.853
ENSG00000160949	TONSL	8	-	145656460	145656534	145655786	145655920	145657667	145659142	1,2,0	11,5,14	12,7,5	0,1,0	134	86	9.15618e-09	3.45218e-07	0.055,0.204,0.0	1.0,0.818,1.0	-0.853
ENSG00000100614	PPM1A	14	+	60717097	60717199	60716158	60716395	60749401	60750255	1,0,0	2,2,3	32,20,27	1,0,3	172	86	5.95455e-06	0.000147575	0.2,0.0,0.0	0.941,1.0,0.818	-0.853
ENSG00000134138	MEIS2	15	-	37329014	37329160	37242524	37242601	37375971	37376086	0,5,1	5,14,13	2,6,3	0,1,0	156	70	3.07831e-05	0.000666689	0.0,0.138,0.033	1.0,0.729,1.0	-0.853
ENSG00000170242	USP47	11	+	11976443	11976491	11974287	11974418	11976580	11976711	5,2,3	100,116,91	9,5,10	1,1,1	82	86	0	0	0.05,0.018,0.033	0.904,0.84,0.913	-0.852
ENSG00000182149	IST1	16	+	71957190	71957287	71956376	71956583	71961516	71962877	2,1,0	79,66,61	8,12,14	1,0,2	172	86	0	0	0.013,0.008,0.0	0.8,1.0,0.778	-0.852
ENSG00000087365	SF3B2	11	+	65823008	65823056	65822546	65822786	65824308	65824342	18,20,21	89,96,74	37,31,32	0,1,0	41	27	0	0	0.118,0.121,0.157	1.0,0.953,1.0	-0.852
ENSG00000138757	G3BP2	4	-	76582740	76582914	76582107	76582198	76584026	76584108	2,4,2	82,83,99	7,14,6	0,1,1	159	73	0	0	0.011,0.022,0.009	1.0,0.865,0.734	-0.852
ENSG00000176171	BNIP3	10	-	133787296	133787447	133786537	133786622	133795264	133795435	3,1,1	14,14,5	7,16,11	1,0,0	164	78	1.24676e-10	5.89469e-09	0.092,0.033,0.087	0.769,1.0,1.0	-0.852
ENSG00000123485	HJURP	2	-	234758408	234758505	234749254	234750851	234761210	234761266	0,0,4	20,20,15	13,5,5	0,0,1	135	49	2.09467e-10	9.64714e-09	0.0,0.0,0.088	1.0,1.0,0.645	-0.852
ENSG00000131871	SELS	15	-	101816745	101816880	101814796	101814886	101817546	101817700	2,9,4	25,42,21	9,3,7	0,0,1	169	83	2.6622e-10	1.20821e-08	0.038,0.095,0.086	1.0,1.0,0.775	-0.852
ENSG00000164327	RICTOR	5	-	39074212	39074260	39021140	39021238	39074430	39074510	1,0,3	36,38,31	1,2,1	0,1,0	69	73	2.45825e-05	0.000542593	0.029,0.0,0.093	1.0,0.679,1.0	-0.852
ENSG00000126870	WDR60	7	+	158698679	158698782	158695066	158695286	158704240	158704370	0,1,0	1,4,4	3,4,7	0,1,0	172	86	0.00186875	0.0265324	0.0,0.111,0.0	1.0,0.667,1.0	-0.852
ENSG00000135446	CDK4	12	-	58145282	58145519	58142302	58142400	58145957	58146116	49,47,32	177152140	65,67,77	2,1,0	172	86	0	0	0.122,0.134,0.103	0.942,0.971,1.0	-0.851
ENSG00000104320	NBN	8	-	90949253	90949303	90945711	90947840	90955480	90955594	1,2,2	86,99,102	10,3,8	4,0,1	86	86	0	0	0.011,0.02,0.019	0.714,1.0,0.889	-0.851
ENSG00000078674	PCM1	8	+	17820609	17820800	17819542	17819683	17822076	17822277	5,2,2	44,53,31	7,8,12	0,1,1	172	86	0	0	0.054,0.019,0.031	1.0,0.8,0.857	-0.851
ENSG00000155755	TMEM237	2	-	202494451	202494575	202493952	202494144	202496773	202496931	1,10,6	21,19,30	14,15,16	1,0,0	172	86	1.44329e-15	1.09024e-13	0.023,0.208,0.091	0.875,1.0,1.0	-0.851
ENSG00000185721	DRG1	22	+	31799014	31799190	31795618	31795711	31806997	31807067	5,4,4	14,17,22	8,13,6	0,1,0	149	63	6.71344e-11	3.24183e-09	0.131,0.09,0.071	1.0,0.846,1.0	-0.851
ENSG00000022840	RNF10	12	+	121008993	121009094	121001612	121001746	121013433	121013491	4,2,4	14,7,11	6,17,11	0,1,0	137	51	6.96786e-10	3.01081e-08	0.096,0.096,0.119	1.0,0.864,1.0	-0.851
ENSG00000143612	C1orf43	1	-	154186932	154187050	154184933	154185100	154192817	154193095	8,3,4	32,37,41	6,6,2	0,1,0	172	86	2.3099e-09	9.36966e-08	0.111,0.039,0.047	1.0,0.75,1.0	-0.851
ENSG00000180891	CUEDC1	17	-	55946482	55946554	55945510	55945604	55950023	55950216	1,3,0	9,6,2	13,10,5	0,1,0	130	86	2.23707e-06	5.94933e-05	0.068,0.249,0.0	1.0,0.869,1.0	-0.851
ENSG00000197694	SPTAN1	9	+	131331050	131331176	131329016	131329256	131336953	131337094	5,2,2	10,11,12	21,18,20	0,0,1	172	86	3.31957e-14	2.25818e-12	0.2,0.083,0.077	1.0,1.0,0.909	-0.85
ENSG00000154803	FLCN	17	-	17135107	17135196	17131202	17131475	17136101	17136215	2,1,8	23,20,21	12,11,7	0,0,1	164	86	3.09563e-12	1.7181e-10	0.044,0.026,0.167	1.0,1.0,0.786	-0.85
ENSG00000107036	KIAA1432	9	+	5753535	5753646	5747301	5747505	5754840	5754930	0,6,4	29,44,38	4,1,2	1,0,0	169	83	1.16208e-06	3.23274e-05	0.0,0.063,0.049	0.663,1.0,1.0	-0.85
ENSG00000110046	ATG2A	11	-	64665732	64665834	64665557	64665642	64666107	64666314	1,3,0	8,13,4	4,5,5	0,0,1	164	78	1.47537e-05	0.000341068	0.056,0.099,0.0	1.0,1.0,0.704	-0.85
ENSG00000175470	PPP2R2D	10	+	133754085	133754198	133753534	133753700	133757471	133757649	19,13,13	53,62,55	16,9,18	0,0,1	172	86	0	0	0.152,0.095,0.106	1.0,1.0,0.9	-0.849
ENSG00000135446	CDK4	12	-	58144989	58145125	58142373	58142400	58145957	58146105	62,66,71	177152140	56,73,84	2,1,0	106	20	0	0	0.062,0.076,0.087	0.841,0.932,1.0	-0.849
ENSG00000135250	SRPK2	7	-	104909252	104909316	104844074	104844232	105029237	105029341	5,8,5	46,32,28	12,11,13	1,0,0	114	86	0	0	0.076,0.159,0.119	0.901,1.0,1.0	-0.849
ENSG00000132824	SERINC3	20	-	43133441	43133532	43132455	43132636	43135467	43135637	2,6,1	27,29,29	12,7,10	1,0,1	168	86	9.99201e-16	7.6312e-14	0.037,0.096,0.017	0.86,1.0,0.837	-0.849
ENSG00000119688	ABCD4	14	-	74756729	74756821	74754512	74754589	74756993	74757202	8,2,3	37,36,40	11,5,6	0,1,0	154	70	3.83726e-12	2.11089e-10	0.089,0.025,0.033	1.0,0.694,1.0	-0.849
ENSG00000150347	ARID5B	10	+	63819001	63819054	63816875	63817077	63829458	63829556	7,3,10	89,73,100	2,3,5	0,1,0	92	86	1.38923e-09	5.78595e-08	0.068,0.037,0.085	1.0,0.737,1.0	-0.849
ENSG00000135775	COG2	1	+	230823816	230823889	230822680	230822878	230824165	230824308	0,0,3	28,29,15	3,1,4	1,0,0	132	86	4.64703e-07	1.38596e-05	0.0,0.0,0.115	0.662,1.0,1.0	-0.849
ENSG00000196262	PPIA	7	+	44838990	44839079	44836279	44836392	44839300	44839610	260285252	904883860	270220236	0,1,5	164	86	0	0	0.131,0.145,0.133	1.0,0.991,0.961	-0.848
ENSG00000130706	ADRM1	20	+	60881703	60881790	60881252	60881376	60882426	60882508	30,40,32	122122104	55,60,54	1,0,1	149	75	0	0	0.11,0.142,0.134	0.965,1.0,0.965	-0.848
ENSG00000099804	CDC34	19	+	535836	535923	531732	532108	536242	536340	5,6,10	61,53,48	16,22,21	1,0,2	160	86	0	0	0.042,0.057,0.101	0.896,1.0,0.849	-0.848
ENSG00000050820	BCAR1	16	-	75267743	75267833	75262928	75263921	75268786	75269884	25,23,14	150140121	12,12,8	0,2,0	166	86	0	0	0.079,0.078,0.057	1.0,0.757,1.0	-0.848
ENSG00000173692	PSMD1	2	+	231951830	231951895	231949732	231949828	232010953	232011070	24,15,19	137154140	4,3,6	0,0,1	116	86	7.80286e-11	3.75188e-09	0.115,0.067,0.091	1.0,1.0,0.816	-0.848
ENSG00000099991	CABIN1	22	+	24564414	24564489	24562606	24563281	24567680	24567963	2,2,1	20,16,7	5,2,10	1,0,0	136	86	3.95624e-08	1.37035e-06	0.059,0.073,0.083	0.76,1.0,1.0	-0.848
ENSG00000100982	PCIF1	20	+	44575711	44575805	44574838	44575023	44575901	44576662	2,3,3	16,9,19	6,2,9	0,0,1	172	86	5.06785e-08	1.72988e-06	0.059,0.143,0.073	1.0,1.0,0.818	-0.848
ENSG00000248592	TMEM110-MUSTN1	3	-	52883807	52883929	52878844	52878957	52886618	52886714	0,1,3	3,6,8	3,7,5	0,1,0	172	86	0.000118932	0.00226941	0.0,0.077,0.158	1.0,0.778,1.0	-0.848
ENSG00000133739	LRRCC1	8	+	86047081	86047267	86043994	86044196	86048023	86048198	1,1,0	4,6,5	11,3,1	2,0,0	172	86	0.000301198	0.00523023	0.111,0.077,0.0	0.733,1.0,1.0	-0.848
ENSG00000169299	PGM2	4	+	37848822	37848916	37848551	37848732	37850142	37850272	0,3,0	2,4,1	6,6,9	0,0,1	172	86	0.00355241	0.0466293	0.0,0.273,0.0	1.0,1.0,0.818	-0.848
ENSG00000189091	SF3B3	16	+	70573006	70573110	70572225	70572363	70578340	70578436	5,2,7	83,74,83	7,6,11	1,0,1	172	86	0	0	0.029,0.013,0.04	0.778,1.0,0.846	-0.847
ENSG00000140157	NIPA2	15	-	23019799	23019856	23012278	23012439	23021197	23021429	3,0,1	59,41,49	11,4,6	2,1,0	100	86	1.11022e-16	9.06291e-15	0.042,0.0,0.017	0.825,0.775,1.0	-0.847
ENSG00000126261	UBA2	19	+	34949673	34949829	34942885	34943052	34951374	34951471	4,2,4	10,15,15	9,16,17	0,1,0	172	86	5.05374e-13	3.04811e-11	0.167,0.063,0.118	1.0,0.889,1.0	-0.847
ENSG00000119688	ABCD4	14	-	74755418	74755468	74754512	74754589	74756993	74757202	4,1,0	37,36,40	2,2,9	0,1,0	70	70	1.57482e-09	6.51749e-08	0.098,0.027,0.0	1.0,0.667,1.0	-0.847
ENSG00000164162	ANAPC10	4	-	146002811	146002902	145916347	145916755	146017136	146017263	1,0,2	14,32,33	3,2,1	1,0,0	168	86	2.19838e-06	5.85394e-05	0.035,0.0,0.03	0.606,1.0,1.0	-0.847
ENSG00000169359	SLC33A1	3	-	155551256	155551374	155547476	155547692	155571011	155571106	0,0,2	16,18,7	2,4,3	0,1,0	172	86	2.70689e-06	7.09571e-05	0.0,0.0,0.125	1.0,0.667,1.0	-0.847
ENSG00000112592	TBP	6	+	170880497	170880592	170878699	170878867	170881273	170881941	3,1,2	36,42,33	8,9,14	1,1,0	172	86	0	0	0.04,0.012,0.029	0.8,0.818,1.0	-0.846
ENSG00000055130	CUL1	7	+	148456395	148456446	148454074	148454242	148456639	148456730	1,0,0	101,88,81	15,8,10	3,1,2	86	84	0	0	0.01,0.0,0.0	0.83,0.887,0.83	-0.846
ENSG00000010292	NCAPD2	12	+	6618882	6618958	6604241	6604391	6619794	6619976	12,10,7	49,45,49	12,11,4	0,1,0	138	86	8.10463e-15	5.78846e-13	0.132,0.122,0.082	1.0,0.873,1.0	-0.846
ENSG00000165669	FAM204A	10	-	120094625	120094725	120085665	120085755	120095693	120095935	8,10,6	71,110,97	4,6,3	1,0,0	169	83	5.25571e-11	2.56678e-09	0.052,0.043,0.029	0.663,1.0,1.0	-0.846
ENSG00000109103	UNC119	17	-	26875016	26875119	26874694	26874867	26879355	26879578	0,0,0	39,46,53	3,2,7	0,0,3	172	86	5.34277e-11	2.60726e-09	0.0,0.0,0.0	1.0,1.0,0.538	-0.846
ENSG00000244045	TMEM199	17	+	26685937	26686012	26684730	26684904	26686337	26686427	0,2,2	25,21,20	6,6,3	2,0,0	133	83	1.47411e-08	5.41645e-07	0.0,0.056,0.059	0.652,1.0,1.0	-0.846
ENSG00000064102	ASUN	12	-	27087488	27087563	27081635	27081838	27089511	27089747	0,1,0	23,31,18	4,7,3	2,0,0	136	86	1.97971e-08	7.15176e-07	0.0,0.02,0.0	0.558,1.0,1.0	-0.846
ENSG00000162971	TYW5	2	-	200801127	200801215	200800653	200800770	200803655	200803793	1,0,1	3,8,14	2,5,3	0,1,0	162	86	3.51781e-05	0.000751932	0.15,0.0,0.037	1.0,0.726,1.0	-0.846
ENSG00000117682	DHDDS	1	+	26772806	26772923	26764658	26764775	26774049	26774667	3,0,0	7,5,3	5,4,2	1,0,0	172	86	0.000998569	0.0152303	0.176,0.0,0.0	0.714,1.0,1.0	-0.846
ENSG00000144028	SNRNP200	2	-	96947551	96947660	96944546	96944736	96948938	96949090	13,18,16	100,105,69	16,21,16	0,3,0	172	86	0	0	0.061,0.079,0.104	1.0,0.778,1.0	-0.845
ENSG00000135698	MPHOSPH6	16	-	82185028	82185119	82181766	82182468	82197686	82197799	7,20,7	128113135	4,6,10	1,0,0	168	86	2.25375e-14	1.55008e-12	0.027,0.083,0.026	0.672,1.0,1.0	-0.845
ENSG00000141446	ESCO1	18	-	19140819	19140951	19116002	19116146	19144163	19144278	3,2,2	18,13,31	5,8,3	1,0,0	172	86	7.38219e-09	2.81124e-07	0.077,0.071,0.031	0.714,1.0,1.0	-0.845
ENSG00000010292	NCAPD2	12	+	6619240	6619299	6604241	6604391	6619794	6619976	2,8,1	49,45,49	3,3,3	0,1,0	104	86	4.3178e-08	1.48608e-06	0.033,0.128,0.017	1.0,0.713,1.0	-0.845
ENSG00000099246	RAB18	10	+	27815756	27815818	27798803	27798859	27822663	27822782	6,1,4	60,58,43	2,2,3	0,0,1	73	49	2.03483e-07	6.36301e-06	0.063,0.011,0.059	1.0,1.0,0.668	-0.845
ENSG00000105185	PDCD5	19	+	33077763	33077835	33076721	33076813	33078158	33078322	20,20,33	82128104	44,43,50	0,1,1	129	85	0	0	0.138,0.093,0.173	1.0,0.966,0.971	-0.844
ENSG00000204574	ABCF1	6	+	30558082	30558155	30557925	30557990	30558311	30559208	8,5,5	80,64,74	12,15,9	2,1,0	104	58	0	0	0.053,0.042,0.036	0.77,0.893,1.0	-0.844
ENSG00000242372	EIF6	20	-	33871978	33872064	33868456	33868632	33872528	33872607	10,12,5	41,28,36	19,15,19	0,1,0	144	72	0	0	0.109,0.176,0.065	1.0,0.882,1.0	-0.844
ENSG00000159840	ZYX	7	+	143085311	143085432	143079893	143080415	143085581	143085751	42,25,34	108,126,90	33,46,39	1,0,0	172	86	0	0	0.163,0.09,0.159	0.943,1.0,1.0	-0.844
ENSG00000125733	TRIP10	19	+	6743204	6743267	6742977	6743125	6743504	6743609	6,4,5	38,40,31	7,6,10	0,1,0	112	86	2.28817e-13	1.43429e-11	0.108,0.071,0.11	1.0,0.822,1.0	-0.844
ENSG00000119688	ABCD4	14	-	74756185	74756222	74754512	74754589	74756993	74757202	3,1,2	37,36,40	6,2,2	0,1,0	44	70	2.12245e-08	7.62758e-07	0.114,0.042,0.074	1.0,0.761,1.0	-0.844
ENSG00000157014	TATDN2	3	+	10290878	10291298	10290595	10290751	10301820	10302354	1,2,0	8,12,8	4,2,3	1,0,0	172	86	7.29959e-05	0.00146189	0.059,0.077,0.0	0.667,1.0,1.0	-0.844
ENSG00000117020	AKT3	1	-	243776972	243777041	243736227	243736350	243778397	243778463	3,0,0	14,9,7	3,2,3	1,0,0	97	59	0.000137671	0.0025924	0.115,0.0,0.0	0.646,1.0,1.0	-0.844
ENSG00000096746	HNRNPH3	10	+	70098896	70098983	70096955	70098444	70099196	70099312	34,35,41	114125103	74,53,74	1,0,0	160	86	0	0	0.138,0.131,0.176	0.975,1.0,1.0	-0.843
ENSG00000132341	RAN	12	+	131357128	131357465	131356614	131356671	131357547	131357673	58,75,54	185231142	102,107,84	0,2,3	136	50	0	0	0.103,0.107,0.123	1.0,0.952,0.911	-0.843
ENSG00000153187	HNRNPU	1	-	245025920	245026032	245023636	245023776	245026975	245027844	1,2,4	13,6,10	14,15,13	1,0,0	172	86	4.07085e-11	2.00464e-09	0.037,0.143,0.167	0.875,1.0,1.0	-0.843
ENSG00000180198	RCC1	1	+	28862773	28862893	28862382	28862538	28863258	28863411	0,0,2	4,3,3	9,6,14	0,0,2	172	86	0.000158674	0.00294733	0.0,0.0,0.25	1.0,1.0,0.778	-0.843
ENSG00000135537	LACE1	6	+	108668191	108668243	108645028	108645252	108677893	108678024	1,0,0	3,6,3	1,7,5	0,2,0	90	86	0.00140491	0.0206074	0.242,0.0,0.0	1.0,0.77,1.0	-0.843
ENSG00000144559	TAMM41	3	-	11868191	11868279	11858561	11858811	11871187	11871384	0,2,0	3,6,4	4,5,1	1,0,0	162	86	0.00207656	0.0290685	0.0,0.15,0.0	0.68,1.0,1.0	-0.843
ENSG00000196235	SUPT5H	19	+	39961016	39961163	39960758	39960914	39961996	39962143	13,8,10	94,69,76	16,22,18	1,0,2	172	86	0	0	0.065,0.055,0.062	0.889,1.0,0.818	-0.842
ENSG00000015479	MATR3	5	+	138651385	138651427	138629410	138629494	138651764	138651877	12,9,9	211213177	18,8,11	0,3,1	61	77	0	0	0.067,0.051,0.06	1.0,0.771,0.933	-0.842
ENSG00000139641	ESYT1	12	+	56527200	56527249	56526502	56526585	56527371	56527458	2,3,0	10,16,11	13,7,13	1,0,1	68	70	3.41214e-11	1.69434e-09	0.171,0.162,0.0	0.93,1.0,0.93	-0.842
ENSG00000174953	DHX36	3	-	154002371	154002458	154000976	154001060	154002602	154002776	1,6,2	16,14,21	7,7,8	1,0,0	151	77	2.2741e-09	9.22746e-08	0.031,0.179,0.046	0.781,1.0,1.0	-0.842
ENSG00000067066	SP100	2	+	231328781	231328865	231327149	231327233	231331015	231331069	3,3,1	10,13,8	7,8,9	0,1,0	106	38	7.00513e-08	2.34739e-06	0.097,0.076,0.043	1.0,0.741,1.0	-0.842
ENSG00000033800	PIAS1	15	+	68475967	68476005	68473549	68473692	68479879	68480402	0,0,2	34,35,47	2,1,4	2,0,0	62	86	9.61644e-07	2.72075e-05	0.0,0.0,0.056	0.581,1.0,1.0	-0.842
ENSG00000100578	KIAA0586	14	+	58943840	58943959	58941324	58941515	58949230	58949430	1,1,0	9,2,5	7,4,3	1,0,0	172	86	9.14415e-05	0.00178927	0.053,0.2,0.0	0.778,1.0,1.0	-0.842
ENSG00000140455	USP3	15	+	63850304	63850387	63848865	63848947	63852055	63852169	0,1,1	7,10,13	2,2,3	0,0,1	141	75	0.000145187	0.00271913	0.0,0.051,0.039	1.0,1.0,0.615	-0.842
ENSG00000076043	REXO2	11	+	114314577	114314655	114310303	114310397	114320567	114320784	5,7,7	75,93,66	18,15,6	2,2,0	142	86	0	0	0.039,0.044,0.06	0.845,0.82,1.0	-0.841
ENSG00000080824	HSP90AA1	14	-	102548447	102548781	102547385	102548158	102549370	102549639	68,81,70	487502447	113119101	7,2,7	172	86	0	0	0.065,0.075,0.073	0.89,0.967,0.878	-0.841
ENSG00000077782	FGFR1	8	-	38285869	38285953	38285438	38285611	38314873	38315052	1,0,1	14,7,5	6,2,7	0,0,2	154	86	9.57518e-06	0.000229186	0.038,0.0,0.1	1.0,1.0,0.662	-0.841
ENSG00000179889	PDXDC1	16	+	15120499	15120563	15116560	15116611	15123807	15123913	0,2,0	17,14,20	1,5,2	0,2,0	72	44	1.17598e-05	0.000277159	0.0,0.08,0.0	1.0,0.604,1.0	-0.841
ENSG00000072071	LPHN1	19	-	14294344	14294509	14288342	14288556	14316796	14316972	0,3,0	5,9,7	2,4,4	0,0,1	172	86	0.000267886	0.00471565	0.0,0.143,0.0	1.0,1.0,0.667	-0.841
ENSG00000061676	NCKAP1	2	-	183817520	183817651	183817132	183817230	183817840	183818059	7,11,10	35,38,31	23,14,11	0,1,0	172	86	0	0	0.091,0.126,0.139	1.0,0.875,1.0	-0.84
ENSG00000152795	HNRPDL	4	-	83349170	83349332	83348585	83348717	83349430	83349599	133,100,89	323375294	69,63,73	0,2,0	172	86	0	0	0.171,0.118,0.131	1.0,0.94,1.0	-0.84
ENSG00000120437	ACAT2	6	+	160199201	160199312	160198333	160198488	160199690	160200078	7,4,7	85,91,86	15,17,10	2,0,1	172	86	0	0	0.04,0.022,0.039	0.789,1.0,0.833	-0.84
ENSG00000134057	CCNB1	5	+	68463999	68464170	68463734	68463905	68467096	68467279	21,21,14	60,55,52	52,37,35	0,1,0	172	86	0	0	0.149,0.16,0.119	1.0,0.949,1.0	-0.84
ENSG00000244045	TMEM199	17	+	26685938	26686012	26684669	26684904	26686337	26686427	1,2,3	25,21,20	7,10,5	2,0,0	131	83	3.32352e-10	1.48506e-08	0.025,0.057,0.087	0.689,1.0,1.0	-0.84
ENSG00000121892	PDS5A	4	-	39846275	39846421	39843567	39843676	39847437	39847500	0,5,2	8,8,9	10,12,10	0,0,1	142	56	5.15572e-08	1.75843e-06	0.0,0.198,0.081	1.0,1.0,0.798	-0.84
ENSG00000124222	STX16	20	+	57242545	57242653	57227128	57227143	57243042	57243183	1,8,5	1,3,3	113112103	1,0,0	94	8	1.91853e-07	6.02205e-06	0.078,0.185,0.124	0.906,1.0,1.0	-0.84
ENSG00000185722	ANKFY1	17	-	4092676	4092774	4088112	4088341	4098272	4098472	2,1,1	25,26,22	3,2,4	1,0,0	172	86	3.31731e-07	1.00822e-05	0.038,0.019,0.022	0.6,1.0,1.0	-0.84
ENSG00000164983	TMEM65	8	-	125335561	125335616	125334345	125334388	125384094	125384933	1,1,1	13,12,12	3,3,2	0,1,0	48	36	3.86315e-05	0.000817745	0.055,0.059,0.059	1.0,0.692,1.0	-0.84
ENSG00000072571	HMMR	5	+	162898190	162898277	162896646	162896835	162900184	162900259	0,1,0	3,3,2	9,4,4	0,1,0	142	68	0.00175425	0.0251159	0.0,0.138,0.0	1.0,0.657,1.0	-0.84
ENSG00000015479	MATR3	5	+	138642927	138644016	138629336	138629494	138651764	138651877	49,49,37	211213177	58,35,54	0,3,1	172	86	0	0	0.104,0.103,0.095	1.0,0.854,0.964	-0.839
ENSG00000168374	ARF4	3	-	57563042	57563114	57561274	57561400	57582800	57583061	24,13,11	81,68,51	21,18,17	0,0,1	130	86	0	0	0.164,0.112,0.125	1.0,1.0,0.918	-0.839
ENSG00000134440	NARS	18	-	55287800	55287883	55283048	55283207	55288939	55289024	15,17,6	49,48,54	27,29,22	1,1,0	144	78	0	0	0.142,0.161,0.057	0.936,0.94,1.0	-0.839
ENSG00000108312	UBTF	17	-	42290585	42290650	42290186	42290307	42293021	42293177	5,5,4	22,29,25	10,15,14	1,0,0	116	86	1.11022e-16	9.06291e-15	0.144,0.113,0.106	0.881,1.0,1.0	-0.839
ENSG00000135372	NAT10	11	+	34162635	34162755	34161946	34162119	34163265	34163364	1,4,8	15,26,27	12,6,11	0,1,0	172	86	1.42146e-11	7.3762e-10	0.032,0.071,0.129	1.0,0.75,1.0	-0.839
ENSG00000166855	CLPX	15	-	65449115	65449270	65448029	65448194	65450083	65450248	3,2,5	29,29,35	11,4,4	0,0,1	172	86	3.39353e-10	1.51363e-08	0.049,0.033,0.067	1.0,1.0,0.667	-0.839
ENSG00000168118	RAB4A	1	+	229431594	229431657	229424475	229424590	229433228	229433383	3,1,6	35,33,44	9,3,3	0,0,1	112	86	9.73544e-10	4.13633e-08	0.062,0.023,0.095	1.0,1.0,0.697	-0.839
ENSG00000072571	HMMR	5	+	162898190	162898277	162896646	162896835	162898368	162898469	1,0,2	4,6,5	16,8,13	0,1,0	160	86	2.97511e-07	9.09541e-06	0.118,0.0,0.177	1.0,0.811,1.0	-0.839
ENSG00000162086	ZNF75A	16	+	3362676	3362768	3361752	3361948	3366911	3367022	0,1,1	4,5,3	4,6,3	0,1,0	170	86	0.000692681	0.0109806	0.0,0.092,0.144	1.0,0.752,1.0	-0.839
ENSG00000204149	AGAP6	10	+	51754154	51754189	51751435	51751504	51761755	51761856	1,0,0	5,11,4	2,2,3	1,0,0	32	62	0.00156244	0.0226564	0.279,0.0,0.0	0.795,1.0,1.0	-0.839
ENSG00000168385	2017-09-02	2	+	242285580	242285664	242283166	242283312	242287548	242287606	38,35,33	168189199	76,59,61	2,1,5	119	51	0	0	0.088,0.074,0.066	0.942,0.962,0.839	-0.838
ENSG00000162614	NEXN	1	+	78390872	78390914	78383809	78383958	78392098	78392296	1,1,1	9,27,12	13,8,7	1,2,0	70	86	2.43228e-12	1.36453e-10	0.12,0.044,0.093	0.941,0.831,1.0	-0.838
ENSG00000142002	DPP9	19	-	4700227	4700289	4697562	4697663	4702038	4702167	2,2,8	38,31,34	4,6,6	1,0,0	110	86	6.30838e-10	2.74299e-08	0.04,0.048,0.155	0.758,1.0,1.0	-0.838
ENSG00000107036	KIAA1432	9	+	5748584	5748714	5747301	5747505	5754840	5754930	3,5,4	29,44,38	4,3,3	1,0,0	169	83	1.03071e-07	3.35279e-06	0.048,0.053,0.049	0.663,1.0,1.0	-0.838
ENSG00000076513	ANKRD13A	12	+	110461850	110461917	110456943	110457133	110463546	110463628	0,1,2	8,9,14	3,4,11	1,0,0	109	75	6.93227e-07	2.01021e-05	0.0,0.071,0.089	0.674,1.0,1.0	-0.838
ENSG00000110583	NAA40	11	+	63714422	63714475	63713311	63713407	63719709	63719805	0,0,1	4,4,8	8,18,12	0,5,2	92	86	1.10786e-06	3.08949e-05	0.0,0.0,0.105	1.0,0.771,0.849	-0.838
ENSG00000163918	RFC4	3	-	186507930	186508044	186507668	186507853	186509513	186509639	0,3,1	4,6,3	12,2,3	1,0,0	172	86	0.000343289	0.00588399	0.0,0.2,0.143	0.857,1.0,1.0	-0.838
ENSG00000165458	INPPL1	11	+	71946159	71946247	71945570	71945659	71946339	71946495	6,6,6	100105118	19,26,19	5,1,0	158	82	0	0	0.03,0.029,0.026	0.664,0.931,1.0	-0.837
ENSG00000215021	PHB2	12	-	7077573	7077871	7077033	7077184	7079358	7079443	15,14,15	57,54,37	13,11,18	0,0,1	164	78	0	0	0.111,0.11,0.162	1.0,1.0,0.895	-0.837
ENSG00000144224	UBXN4	2	+	136519387	136519481	136513156	136513261	136527338	136527393	7,12,23	42,40,50	83,67,73	3,0,3	134	48	0	0	0.056,0.097,0.141	0.908,1.0,0.897	-0.837
ENSG00000253729	PRKDC	8	-	48777116	48777324	48775959	48776138	48790284	48790412	4,7,6	22,15,30	14,10,12	1,0,0	172	86	7.63833e-14	5.0152e-12	0.083,0.189,0.091	0.875,1.0,1.0	-0.837
ENSG00000196498	NCOR2	12	-	124818969	124819163	124817675	124817825	124820028	124820178	5,3,1	15,14,18	17,19,7	0,0,1	172	86	4.85278e-13	2.93544e-11	0.143,0.097,0.027	1.0,1.0,0.778	-0.837
ENSG00000131828	PDHA1	X	+	19369377	19369525	19368054	19368228	19375769	19375837	1,2,4	56,70,64	3,2,4	1,0,0	147	61	1.48023e-09	6.14032e-08	0.007,0.012,0.025	0.555,1.0,1.0	-0.837
ENSG00000167595	C19orf55	19	+	36255967	36256077	36255754	36255837	36257668	36258967	0,0,3	5,2,8	20,13,19	1,1,1	162	76	3.5785e-08	1.24749e-06	0.0,0.0,0.15	0.904,0.859,0.899	-0.837
ENSG00000204227	RING1	6	+	33177402	33177563	33176271	33176421	33177691	33177907	0,2,1	27,16,16	3,3,3	1,0,0	172	86	7.64011e-07	2.19908e-05	0.0,0.059,0.03	0.6,1.0,1.0	-0.837
ENSG00000181852	RNF41	12	-	56604080	56604352	56601931	56602082	56607741	56607854	2,1,1	18,12,15	4,7,2	0,2,0	172	86	1.82295e-06	4.92587e-05	0.053,0.04,0.032	1.0,0.636,1.0	-0.837
ENSG00000157985	AGAP1	2	+	236839408	236839567	236792038	236792093	236877105	236877267	1,0,1	1,1,3	13,23,21	0,0,1	134	48	0.00021028	0.00379492	0.264,0.0,0.107	1.0,1.0,0.883	-0.837
ENSG00000165458	INPPL1	11	+	71946718	71946797	71946339	71946495	71946889	71947030	3,4,6	32,31,29	9,15,19	1,1,0	144	86	0	0	0.053,0.072,0.11	0.843,0.9,1.0	-0.836
ENSG00000106682	EIF4H	7	+	73604576	73604636	73604151	73604248	73609498	73611431	7,7,8	35,54,41	19,9,23	0,1,0	106	86	0	0	0.14,0.095,0.137	1.0,0.88,1.0	-0.836
ENSG00000145220	LYAR	4	-	4288245	4288299	4285347	4285522	4291762	4291896	16,12,18	112103134	37,45,33	2,1,3	94	86	0	0	0.116,0.096,0.109	0.944,0.976,0.91	-0.836
ENSG00000136153	LMO7	13	+	76395312	76395745	76393528	76393671	76397700	76398009	3,4,3	40,27,26	19,13,8	0,1,1	172	86	0	0	0.036,0.069,0.055	1.0,0.867,0.8	-0.836
ENSG00000156261	CCT8	21	-	30441743	30441823	30439876	30440026	30445851	30445886	15,16,18	77,60,72	8,15,14	1,0,0	88	28	3.21965e-15	2.37305e-13	0.058,0.078,0.074	0.718,1.0,1.0	-0.836
ENSG00000197863	ZNF790	19	-	37314186	37314282	37309223	37311016	37314568	37314692	1,2,3	26,29,36	1,2,3	0,0,1	172	86	4.20826e-06	0.000107242	0.019,0.033,0.04	1.0,1.0,0.6	-0.836
ENSG00000073792	IGF2BP2	3	-	185410486	185410550	185407142	185407415	185542570	185542812	3,1,1	20,13,26	3,3,2	0,1,0	114	86	5.87563e-06	0.000145764	0.102,0.055,0.028	1.0,0.694,1.0	-0.836
ENSG00000151532	VTI1A	10	+	114220282	114220341	114207033	114207225	114224305	114224517	1,0,5	16,7,18	6,7,1	0,2,0	104	86	7.89011e-06	0.000191766	0.049,0.0,0.187	1.0,0.743,1.0	-0.836
ENSG00000075539	FRYL	4	-	48712535	48712715	48636434	48636507	48782094	48782316	0,0,1	8,5,3	4,2,2	1,0,0	152	66	0.00080289	0.0125219	0.0,0.0,0.126	0.635,1.0,1.0	-0.836
ENSG00000120805	ARL1	12	-	101796642	101796724	101794839	101794951	101799621	101799759	15,16,27	58,79,56	34,27,36	0,0,1	150	86	0	0	0.129,0.104,0.217	1.0,1.0,0.954	-0.835
ENSG00000115310	RTN4	2	-	55201830	55201900	55199949	55200334	55209650	55209789	75,54,86	279350272	39,41,43	1,0,1	126	86	0	0	0.155,0.095,0.177	0.964,1.0,0.967	-0.835
ENSG00000113013	HSPA9	5	-	137909756	137909858	137909451	137909539	137910926	137911092	7,14,15	127124100	31,18,24	3,1,1	167	81	0	0	0.026,0.052,0.068	0.834,0.897,0.921	-0.835
ENSG00000138119	MYOF	10	-	95139619	95139744	95134519	95134712	95140975	95141153	6,3,9	16,32,28	9,11,10	0,1,0	172	86	1.12277e-12	6.51007e-11	0.158,0.045,0.138	1.0,0.846,1.0	-0.835
ENSG00000087077	TRIP6	7	+	100465482	100465610	100464759	100465228	100466116	100466488	4,3,2	18,7,9	16,14,15	0,0,1	172	86	1.71529e-12	9.75485e-11	0.1,0.176,0.1	1.0,1.0,0.882	-0.835
ENSG00000086758	HUWE1	X	-	53570801	53570929	53569403	53569500	53571520	53571723	0,3,0	11,15,14	9,7,4	1,1,0	172	86	2.12883e-09	8.64646e-08	0.0,0.091,0.0	0.818,0.778,1.0	-0.835
ENSG00000011566	MAP4K3	2	-	39499622	39499683	39499423	39499541	39505547	39505627	5,0,2	15,15,12	6,6,2	1,0,0	95	73	1.32271e-06	3.64861e-05	0.204,0.0,0.114	0.822,1.0,1.0	-0.835
ENSG00000112658	SRF	6	+	43143443	43143705	43141584	43141851	43144285	43144405	3,0,0	4,8,5	12,9,7	0,0,1	172	86	2.87011e-06	7.49516e-05	0.273,0.0,0.0	1.0,1.0,0.778	-0.835
ENSG00000051108	HERPUD1	16	+	56969312	56969387	56969146	56969224	56970598	56970729	4,3,3	23,38,21	15,14,8	0,1,1	121	71	0	0	0.093,0.044,0.077	1.0,0.891,0.824	-0.834
ENSG00000163875	MEAF6	1	-	37974878	37974924	37967404	37967597	37975055	37975143	5,4,4	34,32,32	12,7,9	0,1,0	73	81	1.22125e-15	9.27015e-14	0.14,0.122,0.122	1.0,0.886,1.0	-0.834
ENSG00000106638	TBL2	7	-	72985518	72985671	72984740	72985302	72987173	72987300	6,9,7	33,55,30	11,5,13	0,0,2	172	86	5.49227e-13	3.29664e-11	0.083,0.076,0.104	1.0,1.0,0.765	-0.834
ENSG00000012660	ELOVL5	6	-	53140976	53141054	53139887	53140059	53156573	53156761	6,3,5	57,40,75	6,2,3	0,0,1	142	86	6.20975e-09	2.38961e-07	0.06,0.043,0.039	1.0,1.0,0.645	-0.834
ENSG00000079332	SAR1A	10	-	71921374	71921458	71920759	71920825	71930168	71930228	5,8,12	273294220	7,8,9	0,2,0	94	26	0	0	0.005,0.007,0.015	1.0,0.525,1.0	-0.833
ENSG00000105819	PMPCB	7	+	102952089	102952175	102950761	102950922	102952254	102952343	4,7,4	20,20,19	11,16,19	1,0,0	154	82	1.44329e-15	1.09024e-13	0.096,0.157,0.101	0.854,1.0,1.0	-0.833
ENSG00000105810	CDK6	7	-	92462404	92463004	92404009	92404145	92465791	92465908	11,9,15	90,98,59	8,6,10	0,0,2	172	86	1.83409e-13	1.16017e-11	0.058,0.044,0.113	1.0,1.0,0.714	-0.833
ENSG00000102225	CDK16	X	+	47083783	47083875	47083036	47083158	47084016	47084142	7,8,6	23,25,31	7,12,13	0,1,0	170	86	2.80109e-13	1.74351e-11	0.133,0.139,0.089	1.0,0.859,1.0	-0.833
ENSG00000100744	C14orf129	14	+	96846024	96846125	96829813	96829905	96848583	96848842	0,0,0	54,51,42	5,3,2	0,0,1	171	85	5.7038e-11	2.77365e-09	0.0,0.0,0.0	1.0,1.0,0.499	-0.833
ENSG00000104517	UBR5	8	-	103373809	103373854	103373352	103373434	103424400	103424987	0,1,0	38,57,46	5,1,3	2,0,1	65	75	4.2999e-10	1.89952e-08	0.0,0.02,0.0	0.743,1.0,0.776	-0.833
ENSG00000086758	HUWE1	X	-	53570846	53570929	53569403	53569500	53571520	53571723	0,2,0	11,15,14	7,6,5	1,1,0	152	86	3.45694e-09	1.37097e-07	0.0,0.07,0.0	0.798,0.772,1.0	-0.833
ENSG00000128829	EIF2AK4	15	+	40318177	40318290	40314719	40314806	40321606	40321665	3,0,2	7,12,4	5,9,10	0,0,1	132	46	4.82002e-07	1.43275e-05	0.13,0.0,0.148	1.0,1.0,0.777	-0.833
ENSG00000136738	STAM	10	+	17702462	17702547	17686123	17686378	17730025	17730172	2,1,1	15,16,23	5,2,3	0,0,1	156	86	1.53035e-06	4.18153e-05	0.068,0.033,0.023	1.0,1.0,0.623	-0.833
ENSG00000181544	FANCB	X	-	14875983	14876076	14871160	14871289	14877303	14877456	2,0,0	9,20,7	3,6,2	1,0,0	172	86	4.90076e-06	0.000123433	0.1,0.0,0.0	0.6,1.0,1.0	-0.833
ENSG00000070778	PTPN21	14	-	88952125	88952186	88945263	88946696	88962756	88962836	2,0,0	13,6,8	4,4,2	0,0,1	95	73	8.514e-05	0.00167864	0.106,0.0,0.0	1.0,1.0,0.606	-0.833
ENSG00000108270	AATF	17	+	35311069	35311207	35307513	35307705	35343915	35344030	3,1,0	8,3,1	8,8,6	0,1,0	172	86	0.000168084	0.00310452	0.158,0.143,0.0	1.0,0.8,1.0	-0.833
ENSG00000168807	SNTB2	16	+	69317950	69318147	69304045	69304188	69333492	69333677	1,1,0	8,11,10	3,1,1	1,0,0	172	86	0.000722875	0.011404	0.059,0.043,0.0	0.6,1.0,1.0	-0.833
ENSG00000108561	C1QBP	17	-	5336988	5337087	5336612	5336735	5341442	5341593	23,33,33	219220169	30,35,27	1,2,2	172	86	0	0	0.05,0.07,0.089	0.938,0.897,0.871	-0.832
ENSG00000126254	RBM42	19	+	36124588	36124921	36123999	36124154	36125157	36125275	23,23,29	72,64,68	50,36,41	1,0,0	172	86	0	0	0.138,0.152,0.176	0.962,1.0,1.0	-0.832
ENSG00000111300	NAA25	12	-	112487286	112487415	112486095	112486247	112491361	112491461	0,2,0	6,6,3	25,16,21	1,2,1	172	86	6.60305e-09	2.53079e-07	0.0,0.143,0.0	0.926,0.8,0.913	-0.832
ENSG00000083642	PDS5B	13	+	33309308	33309467	33306237	33306361	33315217	33315286	2,1,1	9,10,7	5,3,7	1,0,0	148	62	8.46089e-06	0.000204719	0.085,0.04,0.056	0.677,1.0,1.0	-0.832
ENSG00000171824	EXOSC10	1	-	11137386	11137500	11136898	11137005	11137657	11137708	0,1,0	9,4,9	4,4,2	0,1,0	130	44	5.7849e-05	0.00118174	0.0,0.078,0.0	1.0,0.575,1.0	-0.832
ENSG00000143870	PDIA6	2	-	10950368	10950546	10937825	10937883	10952803	10952880	0,1,2	1,2,7	6,8,8	0,0,1	121	35	0.000456265	0.00757227	0.0,0.126,0.076	1.0,1.0,0.698	-0.832
ENSG00000063587	ZNF275	X	+	152602091	152602168	152599612	152599743	152610977	152611079	2,4,5	16,16,14	23,41,27	2,0,0	140	86	0	0	0.071,0.133,0.18	0.876,1.0,1.0	-0.831
ENSG00000139726	DENR	12	+	123246733	123246753	123238239	123238354	123247391	123247803	4,2,5	59,48,65	13,12,12	0,0,0	26	86	0	0	0.183,0.121,0.203	1.0,1.0,1.0	-0.831
ENSG00000183576	SETD3	14	-	99870561	99870647	99866435	99866596	99871541	99871708	8,10,6	35,39,34	11,8,12	0,1,0	158	86	3.81917e-14	2.58532e-12	0.111,0.122,0.088	1.0,0.813,1.0	-0.831
ENSG00000162601	MYSM1	1	-	59155897	59155921	59150824	59150923	59156011	59156066	5,2,0	59,56,38	2,4,5	0,0,4	17	48	4.7189e-08	1.61742e-06	0.193,0.092,0.0	1.0,1.0,0.779	-0.831
ENSG00000110075	PPP6R3	11	+	68318588	68318654	68315534	68315672	68334481	68334634	0,1,2	20,17,23	4,2,4	0,0,2	118	86	2.212e-06	5.88894e-05	0.0,0.041,0.06	1.0,1.0,0.593	-0.831
ENSG00000118816	CCNI	4	-	77977114	77977255	77976302	77976533	77977401	77977476	12,7,10	29,32,23	21,19,24	0,1,0	154	68	0	0	0.154,0.088,0.161	1.0,0.893,1.0	-0.83
ENSG00000114744	COMMD2	3	-	149468043	149468169	149459176	149459505	149469189	149469272	4,9,6	18,15,23	22,20,16	1,0,0	162	76	2.22045e-16	1.78565e-14	0.094,0.22,0.109	0.912,1.0,1.0	-0.83
ENSG00000100266	PACSIN2	22	-	43272893	43273016	43272142	43272339	43275053	43275175	8,14,5	49,36,49	13,7,12	0,1,0	172	86	1.5099e-14	1.05421e-12	0.075,0.163,0.049	1.0,0.778,1.0	-0.83
ENSG00000169359	SLC33A1	3	-	155551256	155551374	155547476	155547692	155551645	155551830	0,0,2	108,120,94	3,4,5	0,2,0	172	86	1.09468e-13	7.06086e-12	0.0,0.0,0.011	1.0,0.5,1.0	-0.83
ENSG00000178104	PDE4DIP	1	-	144906420	144906537	144906058	144906196	144909868	144909960	0,1,1	132124124	2,4,2	0,0,1	171	85	2.22411e-12	1.2534e-10	0.0,0.004,0.004	1.0,1.0,0.499	-0.83
ENSG00000088766	CRLS1	20	+	5996006	5996136	5990424	5990558	6015109	6015169	0,5,2	16,20,9	10,9,6	2,0,0	139	53	1.56513e-08	5.73059e-07	0.0,0.087,0.078	0.656,1.0,1.0	-0.83
ENSG00000101019	UQCC	20	-	33961986	33962059	33954359	33954417	33981894	33981999	2,2,1	19,19,27	4,5,3	0,0,1	97	51	1.51551e-07	4.81022e-06	0.052,0.052,0.019	1.0,1.0,0.612	-0.83
ENSG00000214655	KIAA0913	10	+	75548427	75548581	75545382	75545844	75548853	75548948	6,0,4	27,35,24	3,4,2	0,1,0	172	86	1.0496e-06	2.94751e-05	0.1,0.0,0.077	1.0,0.667,1.0	-0.83
ENSG00000221914	PPP2R2A	8	+	26220199	26220364	26217684	26217797	26223830	26223922	5,2,2	22,12,21	5,1,6	1,0,0	171	85	1.53969e-06	4.20519e-05	0.102,0.077,0.045	0.713,1.0,1.0	-0.83
ENSG00000144028	SNRNP200	2	-	96947551	96947660	96945188	96945297	96948938	96949090	11,12,13	42,50,46	21,32,30	0,0,3	172	86	0	0	0.116,0.107,0.124	1.0,1.0,0.833	-0.829
ENSG00000170471	RALGAPB	20	+	37202792	37202941	37199411	37199490	37203416	37207502	12,9,7	36,41,34	10,17,17	0,0,2	158	72	5.55112e-16	4.31905e-14	0.132,0.091,0.086	1.0,1.0,0.795	-0.829
ENSG00000160691	SHC1	1	-	154938421	154938556	154935777	154936407	154938637	154938707	11,13,7	36,35,27	10,12,10	0,1,0	149	63	6.24834e-13	3.7253e-11	0.114,0.136,0.099	1.0,0.835,1.0	-0.829
ENSG00000141380	SS18	18	-	23615794	23615887	23614968	23615091	23619252	23619420	1,1,1	119,129,97	3,2,3	0,1,0	172	86	6.62226e-12	3.55341e-10	0.004,0.004,0.005	1.0,0.5,1.0	-0.829
ENSG00000103194	USP10	16	+	84806146	84806291	84801798	84801964	84812500	84813525	12,8,7	41,40,34	8,2,4	1,0,0	172	86	5.30678e-08	1.80402e-06	0.128,0.091,0.093	0.8,1.0,1.0	-0.829
ENSG00000136280	CCM2	7	+	45077851	45078025	45039847	45039962	45112324	45112382	6,5,0	13,9,6	11,13,2	1,0,0	137	51	1.0697e-06	2.99989e-05	0.147,0.171,0.0	0.804,1.0,1.0	-0.829
ENSG00000102390	CXorf26	X	+	75393419	75393485	75392770	75393003	75394724	75394784	1,1,1	8,22,9	6,1,4	2,0,0	85	53	1.50937e-05	0.000348412	0.072,0.028,0.065	0.652,1.0,1.0	-0.829
ENSG00000127481	UBR4	1	-	19431541	19431683	19431078	19431160	19432226	19432336	3,0,1	10,9,11	2,4,4	0,0,1	161	75	5.10886e-05	0.00105682	0.123,0.0,0.041	1.0,1.0,0.651	-0.829
ENSG00000104863	LIN7B	19	+	49618516	49618588	49617617	49617698	49621111	49621275	0,3,0	2,3,2	11,7,13	1,0,0	118	74	0.000862649	0.0133503	0.0,0.385,0.0	0.873,1.0,1.0	-0.829
ENSG00000197860	SGTB	5	-	64968070	64968108	64967741	64967825	64976320	64976383	4,10,5	53,70,55	22,20,22	0,0,0	23	47	0	0	0.134,0.226,0.157	1.0,1.0,1.0	-0.828
ENSG00000007168	PAFAH1B1	17	+	2569309	2569384	2541392	2541614	2570285	2570492	12,11,11	164184144	9,5,10	1,0,2	136	86	0	0	0.044,0.036,0.046	0.851,1.0,0.76	-0.828
ENSG00000164244	PRRC1	5	+	126860222	126860612	126859151	126859274	126862309	126862470	5,3,3	359395332	8,4,3	0,2,0	172	86	0	0	0.007,0.004,0.004	1.0,0.5,1.0	-0.828
ENSG00000106829	TLE4	9	+	82337873	82337950	82337365	82337516	82339951	82340258	9,8,11	202221208	10,8,7	2,0,1	140	86	0	0	0.027,0.022,0.031	0.754,1.0,0.811	-0.828
ENSG00000111961	SASH1	6	+	148852661	148852797	148848588	148848732	148853932	148854102	2,5,7	16,22,19	4,14,8	0,0,1	172	86	4.89466e-10	2.1493e-08	0.059,0.102,0.156	1.0,1.0,0.8	-0.828
ENSG00000006576	PHTF2	7	+	77578994	77579150	77569515	77569619	77580933	77581029	2,4,2	13,13,8	6,13,8	0,0,1	172	86	6.85397e-09	2.62131e-07	0.071,0.133,0.111	1.0,1.0,0.8	-0.828
ENSG00000150768	DLAT	11	+	111899515	111899669	111896921	111897023	111904127	111904254	4,4,2	9,20,22	8,7,4	1,0,0	172	86	1.69251e-08	6.16793e-07	0.182,0.091,0.043	0.8,1.0,1.0	-0.828
ENSG00000142002	DPP9	19	-	4703897	4704066	4702614	4702728	4704142	4704316	3,4,4	25,12,19	7,3,7	1,0,0	172	86	3.4104e-08	1.19324e-06	0.057,0.143,0.095	0.778,1.0,1.0	-0.828
ENSG00000155465	SLC7A7	14	-	23243141	23243325	23242498	23242925	23248001	23248146	1,1,1	12,13,12	2,3,3	0,1,0	172	86	4.14434e-05	0.000871902	0.04,0.037,0.04	1.0,0.6,1.0	-0.828
ENSG00000133019	CHRM3	1	+	239882095	239882199	239841485	239841588	239990551	239990678	0,2,0	7,2,5	9,3,8	1,0,0	172	86	8.05167e-05	0.00159811	0.0,0.333,0.0	0.818,1.0,1.0	-0.828
ENSG00000128513	POT1	7	-	124499010	124499166	124493025	124493192	124503403	124503694	0,2,1	4,7,8	4,1,9	1,0,0	172	86	0.000132423	0.00250191	0.0,0.125,0.059	0.667,1.0,1.0	-0.828
ENSG00000090520	DNAJB11	3	+	186300504	186300562	186299783	186299866	186301653	186301765	22,23,19	95112115	12,13,14	1,0,0	92	76	0	0	0.161,0.145,0.12	0.908,1.0,1.0	-0.827
ENSG00000165283	STOML2	9	-	35101422	35101557	35101131	35101276	35101706	35101808	8,15,12	126,119,96	29,31,17	1,2,2	172	86	0	0	0.031,0.059,0.059	0.935,0.886,0.81	-0.827
ENSG00000197275	RAD54B	8	-	95390795	95390862	95390407	95390608	95392372	95392634	5,10,7	23,25,26	45,41,56	0,0,0	120	86	0	0	0.135,0.223,0.162	1.0,1.0,1.0	-0.827
ENSG00000112531	QKI	6	+	163899811	163899928	163876310	163876453	163956013	163956157	21,24,15	71,84,86	33,30,28	1,1,1	172	86	0	0	0.129,0.125,0.08	0.943,0.938,0.933	-0.827
ENSG00000113649	TCERG1	5	+	145883386	145883569	145882937	145883102	145886590	145886770	5,2,3	90,74,86	9,8,7	0,0,3	172	86	5.38458e-14	3.58266e-12	0.027,0.013,0.017	1.0,1.0,0.538	-0.827
ENSG00000101871	MID1	X	-	10463623	10463731	10450519	10450668	10491131	10491227	13,7,11	87,75,71	8,3,5	2,0,0	172	86	8.07085e-10	3.45741e-08	0.07,0.045,0.072	0.667,1.0,1.0	-0.827
ENSG00000142751	GPN2	1	-	27212463	27212624	27210650	27210781	27215459	27215616	1,3,2	11,9,4	13,4,3	1,0,0	172	86	2.03184e-06	5.43956e-05	0.043,0.143,0.2	0.867,1.0,1.0	-0.827
ENSG00000142186	SCYL1	11	+	65293594	65293821	65293391	65293514	65294432	65294588	1,0,3	18,8,8	1,4,4	0,1,0	172	86	5.31305e-05	0.00109394	0.027,0.0,0.158	1.0,0.667,1.0	-0.827
ENSG00000103852	TTC23	15	-	99679521	99679672	99676527	99678332	99696352	99696502	1,0,1	7,4,9	3,1,1	1,0,0	172	86	0.00380925	0.0495513	0.067,0.0,0.053	0.6,1.0,1.0	-0.827
ENSG00000127603	MACF1	1	+	39916723	39916883	39914265	39914435	39917827	39918022	4,6,4	96,118,86	12,10,15	0,1,3	172	86	0	0	0.02,0.025,0.023	1.0,0.833,0.714	-0.826
ENSG00000168488	ATXN2L	16	+	28846598	28846720	28846378	28846508	28846869	28847079	0,3,5	73,70,61	11,14,9	1,1,1	172	86	0	0	0.0,0.021,0.039	0.846,0.875,0.818	-0.826
ENSG00000149100	EIF3M	11	+	32616459	32616559	32615411	32615495	32622234	32622378	47,24,22	94139121	29,22,22	0,1,1	163	77	0	0	0.191,0.075,0.079	1.0,0.912,0.912	-0.826
ENSG00000131051	RBM39	20	-	34317233	34317287	34312959	34313077	34319862	34320057	31,24,35	156219148	10,12,6	1,0,0	94	86	0	0	0.154,0.091,0.178	0.901,1.0,1.0	-0.826
ENSG00000204569	PPP1R10	6	-	30572770	30572871	30572364	30572512	30573699	30573812	25,30,23	83,92,75	67,60,62	2,1,1	172	86	0	0	0.131,0.14,0.133	0.944,0.968,0.969	-0.826
ENSG00000123352	SPATS2	12	+	49912855	49912965	49908337	49908396	49916533	49916636	5,0,8	23,20,22	4,7,11	0,0,2	138	52	2.38276e-08	8.50903e-07	0.076,0.0,0.121	1.0,1.0,0.675	-0.826
ENSG00000119689	DLST	14	+	75361014	75361112	75360050	75360127	75366991	75367075	7,5,4	20,28,16	8,1,5	1,0,0	147	61	6.05475e-07	1.77477e-05	0.127,0.069,0.094	0.769,1.0,1.0	-0.826
ENSG00000116698	SMG7	1	+	183515100	183515472	183514064	183514447	183518342	183518423	5,4,0	18,9,9	4,7,4	0,1,0	160	74	5.4842e-06	0.000137202	0.114,0.171,0.0	1.0,0.764,1.0	-0.826
ENSG00000175197	DDIT3	12	-	57911051	57911207	57910370	57910963	57911488	57911536	49,54,47	104,108,77	32,32,22	0,1,0	127	41	0	0	0.132,0.139,0.165	1.0,0.912,1.0	-0.825
ENSG00000132341	RAN	12	+	131357128	131357174	131356423	131356671	131357547	131357673	28,37,21	185231142	65,68,38	0,2,3	78	86	0	0	0.143,0.15,0.14	1.0,0.974,0.933	-0.825
ENSG00000006744	ELAC2	17	-	12905590	12905676	12903472	12903591	12905757	12905896	8,0,5	38,49,32	14,6,6	4,0,0	158	86	5.49367e-11	2.67565e-09	0.103,0.0,0.078	0.656,1.0,1.0	-0.825
ENSG00000104388	RAB2A	8	+	61471410	61471482	61429782	61429812	61496766	61496849	14,7,13	39,45,24	12,5,10	0,0,1	57	13	3.31929e-10	1.48424e-08	0.076,0.034,0.11	1.0,1.0,0.695	-0.825
ENSG00000129691	ASH2L	8	+	37974167	37974243	37972422	37972518	37976787	37976881	3,1,2	9,9,11	8,14,7	0,0,1	138	86	6.45886e-09	2.48087e-07	0.172,0.065,0.102	1.0,1.0,0.814	-0.825
ENSG00000165669	FAM204A	10	-	120095065	120095153	120085665	120085755	120095693	120095935	14,7,2	71,110,97	3,1,4	1,0,0	159	83	7.18948e-08	2.40334e-06	0.093,0.032,0.011	0.61,1.0,1.0	-0.825
ENSG00000100330	MTMR3	22	+	30403102	30403308	30398868	30398982	30403889	30404021	3,1,2	19,18,10	4,3,5	1,0,0	172	86	1.68296e-06	4.56744e-05	0.073,0.027,0.091	0.667,1.0,1.0	-0.825
ENSG00000181610	MRPS23	17	-	55918543	55918621	55918286	55918413	55926600	55926771	17,18,12	78,80,80	11,19,12	0,3,0	142	86	0	0	0.117,0.12,0.083	1.0,0.793,1.0	-0.824
ENSG00000185246	PRPF39	14	+	45577617	45577725	45576653	45576819	45578818	45578983	23,24,33	90,81,77	17,23,16	0,0,1	172	86	0	0	0.113,0.129,0.176	1.0,1.0,0.889	-0.824
ENSG00000006712	PAF1	19	-	39880279	39880401	39880119	39880186	39880708	39880801	3,4,4	36,16,16	10,22,19	1,0,1	146	60	0	0	0.033,0.093,0.093	0.804,1.0,0.886	-0.824
ENSG00000064651	SLC12A2	5	+	127483313	127483421	127477521	127477673	127484445	127484569	10,8,11	76,71,54	25,16,18	2,0,2	172	86	0	0	0.062,0.053,0.092	0.862,1.0,0.818	-0.824
ENSG00000169756	LIMS1	2	+	109287236	109287303	109150911	109151050	109288780	109288901	10,8,8	70,85,68	6,12,7	1,1,0	120	86	1.11022e-16	9.06291e-15	0.093,0.063,0.078	0.811,0.896,1.0	-0.824
ENSG00000115211	EIF2B4	2	-	27590323	27590426	27589940	27590068	27591520	27591600	2,3,2	17,17,18	4,6,2	1,0,0	159	73	1.80396e-06	4.87669e-05	0.051,0.075,0.049	0.647,1.0,1.0	-0.824
ENSG00000101557	USP14	18	+	166786	166819	163307	163453	180235	180339	0,3,1	21,25,11	2,3,3	1,0,0	52	86	1.57399e-05	0.000361718	0.0,0.166,0.131	0.768,1.0,1.0	-0.824
ENSG00000197713	RPE	2	+	210874380	210874460	210867373	210867496	210880696	210880836	3,1,0	6,7,3	8,6,12	0,0,2	146	86	2.56129e-05	0.00056314	0.228,0.078,0.0	1.0,1.0,0.779	-0.824
ENSG00000134152	C15orf29	15	-	34438961	34439051	34437598	34437692	34439400	34439490	1,2,0	7,15,5	3,3,3	1,0,0	163	83	0.000157412	0.00292694	0.068,0.064,0.0	0.604,1.0,1.0	-0.824
ENSG00000108666	C17orf75	17	-	30666831	30666957	30665228	30665370	30668222	30668303	0,1,2	1,4,4	6,6,7	0,0,1	160	74	0.00128773	0.0190909	0.0,0.104,0.188	1.0,1.0,0.764	-0.824
ENSG00000106263	EIF3B	7	+	2406159	2406226	2405951	2406083	2406633	2406680	2,12,6	42,52,37	12,21,19	0,2,2	74	40	0	0	0.025,0.111,0.081	1.0,0.85,0.837	-0.823
ENSG00000073584	SMARCE1	17	-	38788446	38788619	38787843	38787945	38792182	38792354	11,10,11	43,44,28	23,26,26	1,0,1	172	86	0	0	0.113,0.102,0.164	0.92,1.0,0.929	-0.823
ENSG00000111142	METAP2	12	+	95876990	95877056	95869849	95869954	95879654	95879757	11,11,12	96,95,78	15,21,10	3,1,0	118	86	0	0	0.077,0.078,0.101	0.785,0.939,1.0	-0.823
ENSG00000149428	HYOU1	11	-	118922530	118922663	118922149	118922337	118922801	118922884	11,19,19	106155118	15,9,24	4,0,0	162	76	0	0	0.046,0.054,0.07	0.638,1.0,1.0	-0.823
ENSG00000152422	XRCC4	5	+	82406846	82407022	82400726	82400877	82491588	82491755	2,2,3	14,16,11	4,5,4	0,1,0	172	86	2.51698e-06	6.62159e-05	0.067,0.059,0.12	1.0,0.714,1.0	-0.823
ENSG00000137486	ARRB1	11	-	74987882	74987955	74985117	74985255	74988407	74988492	2,4,1	15,12,8	1,5,6	0,0,1	124	78	1.47716e-05	0.00034142	0.077,0.173,0.073	1.0,1.0,0.791	-0.823
ENSG00000141564	RPTOR	17	+	78858807	78858948	78857580	78857772	78865519	78865637	1,0,1	9,7,6	4,3,3	0,1,0	172	86	0.00017356	0.00319287	0.053,0.0,0.077	1.0,0.6,1.0	-0.823
ENSG00000155313	USP25	21	+	17183455	17183529	17138315	17138460	17191016	17191165	1,3,0	12,12,4	3,2,3	0,0,1	134	86	0.000386855	0.00654332	0.051,0.138,0.0	1.0,1.0,0.658	-0.823
ENSG00000123983	ACSL3	2	+	223793579	223793654	223789173	223789313	223795338	223795530	4,6,5	21,35,21	13,16,15	1,1,0	136	86	0	0	0.107,0.098,0.131	0.892,0.91,1.0	-0.822
ENSG00000138119	MYOF	10	-	95137079	95137186	95134519	95134712	95140975	95141153	4,4,11	16,32,28	8,8,7	0,1,0	172	86	4.70847e-10	2.0712e-08	0.111,0.059,0.164	1.0,0.8,1.0	-0.822
ENSG00000121892	PDS5A	4	-	39903966	39904080	39902045	39902127	39905659	39905811	5,5,4	53,68,43	4,6,5	0,2,0	161	75	1.65252e-09	6.82319e-08	0.042,0.033,0.042	1.0,0.583,1.0	-0.822
ENSG00000100888	CHD8	14	-	21863456	21863511	21863070	21863278	21863975	21864051	4,7,4	70,83,63	4,4,4	0,2,0	79	69	2.47232e-09	9.9862e-08	0.048,0.069,0.053	1.0,0.636,1.0	-0.822
ENSG00000011405	PIK3C2A	11	-	17140766	17140860	17140191	17140286	17141332	17141521	0,1,1	28,33,25	3,2,4	0,1,0	172	86	1.93621e-07	6.0714e-06	0.0,0.015,0.02	1.0,0.5,1.0	-0.822
ENSG00000141994	DUS3L	19	-	5788367	5788409	5788034	5788187	5789217	5789730	1,4,4	17,26,21	4,6,1	0,1,0	70	86	1.1667e-06	3.24336e-05	0.067,0.159,0.19	1.0,0.881,1.0	-0.822
ENSG00000185485	SDHAP1	3	-	195690170	195690292	195686791	195686957	195692299	195692413	1,0,2	4,2,2	20,22,12	1,0,0	172	86	1.54761e-05	0.000356316	0.111,0.0,0.333	0.909,1.0,1.0	-0.822
ENSG00000146376	ARHGAP18	6	-	129929037	129929197	129921786	129921993	129932677	129932755	2,0,3	18,10,21	3,1,3	0,0,1	157	71	5.28476e-05	0.00108922	0.048,0.0,0.061	1.0,1.0,0.576	-0.822
ENSG00000104375	STK3	8	-	99591891	99592017	99560187	99560389	99718694	99718862	0,1,0	10,2,6	3,4,5	0,1,0	172	86	9.95208e-05	0.00192947	0.0,0.2,0.0	1.0,0.667,1.0	-0.822
ENSG00000007168	PAFAH1B1	17	+	2568665	2568750	2541392	2541614	2570285	2570492	8,6,3	164184144	11,13,7	1,0,2	156	86	0	0	0.026,0.018,0.011	0.858,1.0,0.659	-0.821
ENSG00000215021	PHB2	12	-	7077573	7077758	7077054	7077184	7079358	7079443	21,12,18	57,54,37	13,11,18	0,0,1	164	78	0	0	0.149,0.096,0.188	1.0,1.0,0.895	-0.821
ENSG00000108854	SMURF2	17	-	62582203	62582288	62579578	62579662	62587201	62587267	40,50,43	121177124	25,10,21	0,0,2	120	50	0	0	0.121,0.105,0.126	1.0,1.0,0.814	-0.821
ENSG00000163938	GNL3	3	+	52725557	52725645	52724960	52725087	52726887	52727062	7,6,8	24,19,21	19,19,11	0,1,0	162	86	3.33067e-16	2.64431e-14	0.134,0.144,0.168	1.0,0.91,1.0	-0.821
ENSG00000165733	BMS1	10	+	43312046	43312120	43293915	43294073	43312765	43312942	3,6,1	33,31,20	12,4,3	0,0,1	134	86	3.61588e-09	1.43081e-07	0.055,0.11,0.031	1.0,1.0,0.658	-0.821
ENSG00000115207	GTF3C2	2	-	27558783	27559292	27558494	27558573	27560110	27560175	5,7,5	19,17,18	5,11,9	0,0,1	130	44	7.87792e-09	2.99087e-07	0.082,0.122,0.086	1.0,1.0,0.753	-0.821
ENSG00000156599	ZDHHC5	11	+	57464232	57464345	57463391	57463515	57467337	57468659	4,0,1	26,21,22	5,5,7	0,2,0	172	86	3.56794e-08	1.24451e-06	0.071,0.0,0.022	1.0,0.556,1.0	-0.821
ENSG00000061273	HDAC7	12	-	48190799	48190925	48189989	48190081	48191166	48191275	3,2,2	11,12,10	6,3,11	1,0,0	171	85	3.79872e-07	1.14669e-05	0.119,0.077,0.09	0.749,1.0,1.0	-0.821
ENSG00000108424	KPNB1	17	+	45755673	45755779	45755411	45755555	45757385	45757500	23,26,17	43,72,40	50,46,57	0,0,0	172	86	0	0	0.211,0.153,0.175	1.0,1.0,1.0	-0.82
ENSG00000053254	FOXN3	14	-	89656730	89656793	89647044	89647150	89817015	89817152	2,2,1	24,34,22	8,4,7	2,0,1	112	86	2.71265e-11	1.35838e-09	0.06,0.043,0.034	0.754,1.0,0.843	-0.82
ENSG00000149554	CHEK1	11	+	125507343	125507439	125503057	125503246	125513686	125513795	9,1,4	22,17,15	7,7,7	1,0,0	172	86	2.6307e-08	9.33555e-07	0.17,0.029,0.118	0.778,1.0,1.0	-0.82
ENSG00000115307	AUP1	2	-	74755543	74755616	74755066	74755133	74756258	74756409	1,1,9	17,20,11	8,9,6	0,1,0	106	60	4.95813e-08	1.69568e-06	0.032,0.028,0.317	1.0,0.836,1.0	-0.82
ENSG00000257076	NA	12	-	123647560	123647681	123645682	123645930	123648496	123648637	0,1,0	12,12,21	2,2,2	0,0,1	172	86	8.29386e-05	0.00163991	0.0,0.04,0.0	1.0,1.0,0.5	-0.82
ENSG00000198301	SDAD1	4	-	76888429	76888487	76886916	76886975	76890448	76890552	0,2,0	15,9,16	1,2,3	0,1,0	68	52	0.000141489	0.00265546	0.0,0.145,0.0	1.0,0.605,1.0	-0.82
ENSG00000148719	DNAJB12	10	-	74097959	74098069	74096281	74096454	74100546	74100626	1,0,1	5,5,4	4,4,1	0,1,0	159	73	0.00204928	0.0287222	0.084,0.0,0.103	1.0,0.647,1.0	-0.82
ENSG00000148848	ADAM12	10	-	127797161	127797233	127789640	127789810	127806606	127806793	1,2,0	7,6,5	4,1,2	1,0,0	130	86	0.00293799	0.0395038	0.086,0.181,0.0	0.726,1.0,1.0	-0.82
ENSG00000091136	LAMB1	7	-	107599693	107599925	107595911	107596075	107601650	107601774	20,16,11	65,74,72	16,19,18	0,3,0	172	86	0	0	0.133,0.098,0.071	1.0,0.76,1.0	-0.819
ENSG00000159086	GCFC1	21	-	34115558	34115625	34110483	34110630	34115988	34116065	0,0,0	40,53,37	11,13,11	3,3,0	104	70	0	0	0.0,0.0,0.0	0.712,0.745,1.0	-0.819
ENSG00000180104	EXOC3	5	+	457003	457121	453511	454166	462074	462185	17,10,11	153140110	102,99,111	10,5,10	172	86	0	0	0.053,0.034,0.048	0.836,0.908,0.847	-0.819
ENSG00000163781	TOPBP1	3	-	133327378	133327540	133319416	133320237	133327716	133327806	0,1,3	14,10,23	6,12,9	1,0,1	169	83	1.68607e-11	8.68056e-10	0.0,0.047,0.06	0.747,1.0,0.816	-0.819
ENSG00000115761	NOL10	2	-	10743203	10743283	10742901	10743000	10747310	10747437	2,4,6	26,26,21	11,5,9	0,0,2	146	86	3.32185e-10	1.48485e-08	0.043,0.083,0.144	1.0,1.0,0.726	-0.819
ENSG00000152601	MBNL1	3	+	152174055	152174150	152163070	152163328	152177059	152177134	5,4,7	43,43,30	5,4,6	0,1,0	154	68	8.20897e-09	3.11371e-07	0.049,0.039,0.093	1.0,0.638,1.0	-0.819
ENSG00000075420	FNDC3B	3	+	171969049	171969331	171944660	171944737	172003715	172003774	4,2,0	10,17,7	4,1,5	0,0,1	122	36	5.77129e-05	0.00117934	0.106,0.034,0.0	1.0,1.0,0.596	-0.819
ENSG00000152404	CWF19L2	11	-	107309815	107309909	107304359	107304475	107312228	107312348	0,0,2	4,19,6	1,3,1	0,1,0	172	86	0.000792725	0.0123914	0.0,0.0,0.143	1.0,0.6,1.0	-0.819
ENSG00000148498	PARD3	10	-	34739244	34739376	34690753	34690845	34759012	34759191	1,0,1	7,3,3	4,3,4	0,0,1	171	85	0.00132886	0.0196376	0.066,0.0,0.142	1.0,1.0,0.665	-0.819
ENSG00000148484	RSU1	10	-	16796869	16796988	16737021	16737154	16806388	16806509	5,7,7	28,21,34	16,15,8	1,1,0	172	86	6.66134e-16	5.14747e-14	0.082,0.143,0.093	0.889,0.882,1.0	-0.818
ENSG00000196498	NCOR2	12	-	124818969	124819826	124817675	124817825	124820028	124820938	4,4,5	15,14,18	20,20,9	0,0,1	172	86	7.4829e-14	4.92093e-12	0.118,0.125,0.122	1.0,1.0,0.818	-0.818
ENSG00000155816	FMN2	1	+	240458121	240458183	240421244	240421332	240492375	240492467	1,2,0	22,16,18	4,6,5	1,1,0	104	80	3.52085e-09	1.39498e-07	0.034,0.088,0.0	0.755,0.822,1.0	-0.818
ENSG00000120451	SNX19	11	-	130773149	130773279	130750516	130750701	130775847	130776028	1,3,2	15,10,3	13,13,7	1,0,0	172	86	4.78204e-09	1.86441e-07	0.032,0.13,0.25	0.867,1.0,1.0	-0.818
ENSG00000160294	MCM3AP	21	-	47685838	47686080	47685234	47685437	47686895	47687056	3,1,2	10,10,11	11,12,10	0,0,2	172	86	1.16591e-08	4.34166e-07	0.13,0.048,0.083	1.0,1.0,0.714	-0.818
ENSG00000145391	SETD7	4	-	140468073	140468203	140453735	140454520	140477251	140477928	3,2,1	21,21,14	2,5,3	0,0,1	172	86	4.53036e-06	0.00011491	0.067,0.045,0.034	1.0,1.0,0.6	-0.818
ENSG00000085978	ATG16L1	2	+	234198499	234198620	234191327	234191399	234198893	234198999	3,1,4	14,23,21	4,1,3	1,0,0	151	65	1.95829e-05	0.000439803	0.084,0.018,0.076	0.633,1.0,1.0	-0.818
ENSG00000164506	STXBP5	6	+	147612229	147612308	147599216	147599340	147631219	147631374	1,0,1	9,20,20	2,1,4	1,0,0	144	86	4.47806e-05	0.000937387	0.062,0.0,0.029	0.544,1.0,1.0	-0.818
ENSG00000105663	MLL4	19	+	36224497	36224587	36223115	36224409	36224663	36224773	9,8,10	121131139	76,64,64	1,15,4	166	86	0	0	0.037,0.031,0.036	0.975,0.689,0.892	-0.817
ENSG00000110880	CORO1C	12	-	109051079	109051199	109048081	109048186	109052513	109052598	21,32,32	298296286	38,36,35	2,6,1	164	78	0	0	0.032,0.049,0.051	0.9,0.741,0.943	-0.817
ENSG00000183255	PTTG1IP	21	-	46275124	46275171	46271321	46271542	46276107	46276279	13,10,10	180169180	16,18,18	1,4,3	80	86	0	0	0.072,0.06,0.056	0.945,0.829,0.866	-0.817
ENSG00000137501	SYTL2	11	-	85415900	85416071	85411557	85411636	85429832	85430211	10,5,14	27,38,21	5,5,17	0,0,1	158	72	2.09468e-10	9.64714e-09	0.144,0.057,0.233	1.0,1.0,0.886	-0.817
ENSG00000213699	C2orf18	2	+	26997911	26998083	26987151	26987294	26998331	26998544	0,3,8	29,22,16	10,10,9	0,2,0	172	86	2.87649e-10	1.29789e-08	0.0,0.064,0.2	1.0,0.714,1.0	-0.817
ENSG00000107862	GBF1	10	+	104135115	104135341	104130463	104130617	104136028	104136189	3,2,0	42,62,46	11,2,3	0,1,0	172	86	4.93677e-10	2.16626e-08	0.034,0.016,0.0	1.0,0.5,1.0	-0.817
ENSG00000131828	PDHA1	X	+	19373803	19373875	19368054	19368228	19375769	19375837	14,15,14	56,70,64	7,4,2	1,0,0	105	61	4.27042e-08	1.4714e-06	0.127,0.111,0.113	0.803,1.0,1.0	-0.817
ENSG00000136699	SMPD4	2	-	130914823	130914969	130914157	130914248	130921946	130922018	0,0,3	4,4,3	9,7,2	0,1,0	149	63	0.00090325	0.0139336	0.0,0.0,0.297	1.0,0.747,1.0	-0.817
ENSG00000171456	ASXL1	20	+	30956814	30956926	30954186	30954269	31015930	31016051	5,7,10	15,26,18	40,36,47	0,1,1	162	76	0	0	0.135,0.112,0.207	1.0,0.944,0.957	-0.816
ENSG00000111530	CAND1	12	+	67703931	67704096	67703680	67703850	67705472	67705580	8,5,7	48,39,37	15,12,15	2,0,1	172	86	0	0	0.077,0.06,0.086	0.789,1.0,0.882	-0.816
ENSG00000109323	MANBA	4	-	103612036	103612114	103611752	103611928	103644027	103644198	2,6,6	12,21,23	24,17,13	1,0,1	142	86	1.11022e-16	9.06291e-15	0.092,0.148,0.136	0.936,1.0,0.887	-0.816
ENSG00000214046	C19orf42	19	-	16763415	16763772	16756471	16758072	16770895	16770941	29,35,34	81,80,78	12,18,3	1,0,0	125	39	2.79998e-12	1.56097e-10	0.1,0.12,0.12	0.789,1.0,1.0	-0.816
ENSG00000134371	CDC73	1	+	193205385	193205486	193202122	193202284	193218859	193219001	3,4,3	11,15,15	8,10,7	0,0,1	172	86	7.63682e-09	2.90377e-07	0.12,0.118,0.091	1.0,1.0,0.778	-0.816
ENSG00000067113	PPAP2A	5	-	54737678	54737736	54721690	54721867	54763696	54763977	1,7,2	19,18,22	2,2,5	0,0,1	102	86	2.50784e-05	0.000552364	0.042,0.247,0.071	1.0,1.0,0.808	-0.816
ENSG00000134602	MST4	X	+	131157535	131157687	131157332	131157435	131188658	131188889	3,1,0	9,6,2	4,2,4	1,0,0	172	86	0.00154165	0.0223923	0.143,0.077,0.0	0.667,1.0,1.0	-0.816
ENSG00000138069	RAB1A	2	-	65316072	65316204	65315430	65315824	65318116	65318212	31,42,29	236179173	31,37,33	2,3,1	172	86	0	0	0.062,0.105,0.077	0.886,0.86,0.943	-0.815
ENSG00000117523	PRRC2C	1	+	171540458	171540560	171535730	171535982	171544065	171544267	47,31,39	86,99,76	193193217	0,0,0	172	86	0	0	0.215,0.135,0.204	1.0,1.0,1.0	-0.815
ENSG00000115758	ODC1	2	-	10584599	10584773	10583827	10583962	10585056	10585175	11,9,13	33,46,25	15,18,19	1,0,0	172	86	0	0	0.143,0.089,0.206	0.882,1.0,1.0	-0.815
ENSG00000106290	TAF6	7	-	99710971	99711392	99710420	99710540	99711490	99711577	6,6,6	29,21,29	14,15,14	0,1,1	166	80	1.11022e-16	9.06291e-15	0.091,0.121,0.091	1.0,0.878,0.871	-0.815
ENSG00000071655	MBD3	19	-	1581090	1581268	1576677	1578537	1584538	1584676	16,12,17	71,51,35	11,15,9	1,0,0	172	86	2.77556e-15	2.05424e-13	0.101,0.105,0.195	0.846,1.0,1.0	-0.815
ENSG00000134440	NARS	18	-	55274365	55274565	55273088	55273202	55274675	55274715	3,1,1	182168136	6,4,6	0,0,2	119	33	1.4766e-14	1.03153e-12	0.005,0.002,0.002	1.0,1.0,0.454	-0.815
ENSG00000110344	UBE4A	11	+	118260439	118260620	118257152	118257327	118261371	118261519	0,1,2	17,26,21	9,9,9	1,0,2	172	86	5.27023e-13	3.171e-11	0.0,0.019,0.045	0.818,1.0,0.692	-0.815
ENSG00000116991	SIPA1L2	1	-	232539870	232539924	232539193	232539317	232561334	232561554	0,0,2	5,12,12	24,15,20	6,1,3	94	86	1.42453e-11	7.38902e-10	0.0,0.0,0.132	0.785,0.932,0.859	-0.815
ENSG00000184047	DIABLO	12	-	122701034	122701131	122692215	122693124	122701305	122701416	5,12,12	25,32,27	7,8,14	0,0,1	172	86	2.16037e-11	1.09682e-09	0.091,0.158,0.182	1.0,1.0,0.875	-0.815
ENSG00000095906	NUBP2	16	+	1838138	1838208	1837941	1838052	1838569	1839083	4,4,2	15,20,24	14,9,5	0,0,1	126	86	3.83732e-11	1.89488e-09	0.154,0.12,0.054	1.0,1.0,0.773	-0.815
ENSG00000123200	ZC3H13	13	-	46619525	46619648	46594583	46594692	46626538	46626881	5,3,2	22,15,18	8,12,9	0,0,2	172	86	1.02251e-09	4.33699e-08	0.102,0.091,0.053	1.0,1.0,0.692	-0.815
ENSG00000105835	NAMPT	7	-	105915391	105915495	105912975	105913104	105925273	105925638	8,8,3	22,17,33	6,7,10	0,0,1	172	86	1.04294e-09	4.4191e-08	0.154,0.19,0.043	1.0,1.0,0.833	-0.815
ENSG00000103194	USP10	16	+	84767040	84767109	84733600	84733717	84778238	84779279	3,2,6	63,49,50	2,2,2	0,0,1	124	86	2.34621e-06	6.22098e-05	0.032,0.028,0.077	1.0,1.0,0.581	-0.815
ENSG00000114439	BBX	3	+	107491474	107492483	107474444	107474525	107493565	107493704	0,0,1	11,16,12	3,2,1	0,1,0	160	74	0.00026026	0.00459694	0.0,0.0,0.037	1.0,0.481,1.0	-0.815
ENSG00000166986	MARS	12	+	57883678	57883754	57881719	57881982	57883989	57884141	8,13,8	49,45,22	11,22,22	0,2,0	138	86	0	0	0.092,0.153,0.185	1.0,0.873,1.0	-0.814
ENSG00000058262	SEC61A1	3	+	127785796	127785994	127783719	127783880	127786263	127786455	17,14,17	74,50,53	38,29,36	1,0,3	172	86	0	0	0.103,0.123,0.138	0.95,1.0,0.857	-0.814
ENSG00000101158	TH1L	20	+	57568503	57568599	57568052	57568167	57569164	57569246	7,9,7	31,31,13	10,13,16	0,1,0	161	75	6.38378e-14	4.21818e-12	0.095,0.119,0.201	1.0,0.858,1.0	-0.814
ENSG00000197694	SPTAN1	9	+	131369882	131369982	131367574	131367756	131370130	131370268	4,6,2	24,15,15	9,6,15	0,1,0	172	86	2.62002e-10	1.1895e-08	0.077,0.167,0.063	1.0,0.75,1.0	-0.814
ENSG00000145740	SLC30A5	5	+	68413065	68413223	68412220	68412429	68414325	68414455	2,3,0	26,24,21	7,7,8	0,3,0	172	86	9.05159e-09	3.41562e-07	0.037,0.059,0.0	1.0,0.538,1.0	-0.814
ENSG00000105323	HNRNPUL1	19	+	41779886	41779960	41777986	41778140	41782063	41782203	8,23,11	38,50,26	43,39,49	0,0,0	134	86	0	0	0.119,0.228,0.214	1.0,1.0,1.0	-0.813
ENSG00000144395	CCDC150	2	+	197576868	197576976	197541277	197541455	197583226	197583355	7,6,8	14,17,15	46,32,53	0,0,0	172	86	0	0	0.2,0.15,0.211	1.0,1.0,1.0	-0.813
ENSG00000100353	EIF3D	22	-	36913347	36913540	36912751	36912837	36915451	36915548	13,18,12	49,64,33	19,14,12	2,0,0	165	79	1.11022e-16	9.06291e-15	0.113,0.119,0.148	0.82,1.0,1.0	-0.813
ENSG00000100650	SRSF5	14	+	70235514	70235613	70235320	70235391	70237711	70237822	3,8,5	14,13,15	24,24,28	0,0,2	150	64	2.33147e-15	1.73381e-13	0.084,0.208,0.125	1.0,1.0,0.857	-0.813
ENSG00000105135	ILVBL	19	-	15226376	15226482	15225797	15226241	15226660	15226732	6,2,1	18,9,9	13,13,10	1,1,0	151	65	1.40044e-10	6.59122e-09	0.125,0.087,0.046	0.848,0.848,1.0	-0.813
ENSG00000131626	PPFIA1	11	+	70184479	70184559	70181668	70181800	70185276	70185412	2,4,7	29,34,22	6,4,2	0,1,0	146	86	3.88076e-07	1.1689e-05	0.039,0.065,0.158	1.0,0.702,1.0	-0.813
ENSG00000080546	SESN1	6	-	109319715	109319958	109315664	109315812	109321693	109321876	4,6,7	60,44,50	3,2,3	0,0,1	172	86	9.88021e-07	2.78942e-05	0.032,0.064,0.065	1.0,1.0,0.6	-0.813
ENSG00000180228	PRKRA	2	-	179314968	179315138	179309148	179309227	179315692	179315878	1,1,0	6,2,6	10,5,14	0,1,0	158	72	6.50052e-06	0.000160308	0.071,0.186,0.0	1.0,0.695,1.0	-0.813
ENSG00000166199	ALKBH3	11	+	43905532	43905567	43904632	43904738	43908155	43908203	1,1,0	66,45,49	1,2,2	0,3,0	28	41	1.68863e-05	0.000384655	0.022,0.032,0.0	1.0,0.494,1.0	-0.813
ENSG00000115866	DARS	2	-	136690352	136690412	136681987	136682068	136700947	136701050	0,2,1	13,12,13	4,1,1	2,0,0	94	74	0.000776698	0.0121628	0.0,0.116,0.057	0.612,1.0,1.0	-0.813
ENSG00000112763	BTN2A1	6	+	26458834	26458946	26458149	26458370	26459708	26460056	3,1,0	4,7,2	6,3,7	0,0,1	172	86	0.000839855	0.0130429	0.273,0.067,0.0	1.0,1.0,0.778	-0.813
ENSG00000088930	XRN2	20	+	21337223	21337303	21336717	21336815	21338373	21338430	13,6,10	22,28,24	25,19,31	0,1,0	110	50	0	0	0.212,0.089,0.159	1.0,0.896,1.0	-0.812
ENSG00000100934	SEC23A	14	-	39524346	39524500	39517855	39517933	39532527	39532617	8,20,20	70,63,56	17,13,14	1,0,1	154	68	0	0	0.048,0.123,0.136	0.882,1.0,0.861	-0.812
ENSG00000139746	RBM26	13	-	79918803	79918929	79918382	79918457	79928573	79928705	6,13,9	33,33,24	6,7,9	0,0,1	154	68	1.89249e-09	7.74464e-08	0.074,0.148,0.142	1.0,1.0,0.799	-0.812
ENSG00000175197	DDIT3	12	-	57911051	57911221	57910375	57910963	57911488	57911536	27,18,13	104,108,77	3,5,5	0,1,0	127	41	5.49693e-08	1.86611e-06	0.077,0.051,0.052	1.0,0.617,1.0	-0.812
ENSG00000137478	FCHSD2	11	-	72613587	72613683	72600873	72600990	72632872	72632995	1,1,4	38,58,45	2,1,5	1,0,0	172	86	1.96637e-07	6.15824e-06	0.013,0.009,0.043	0.5,1.0,1.0	-0.812
ENSG00000138674	SEC31A	4	-	83783686	83783725	83778841	83778917	83784470	83784545	0,1,1	3,10,8	14,6,9	2,0,3	29	51	3.84233e-07	1.15873e-05	0.0,0.15,0.18	0.925,1.0,0.841	-0.812
ENSG00000141027	NCOR1	17	-	15971207	15971435	15968798	15969008	15973478	15973839	0,1,1	20,17,14	4,2,1	0,1,0	172	86	4.2252e-05	0.000888042	0.0,0.029,0.034	1.0,0.5,1.0	-0.812
ENSG00000122085	MTERFD2	2	-	242038810	242039309	242028639	242028780	242041667	242041724	1,2,0	9,14,14	1,3,2	0,1,0	136	50	0.000172287	0.00317225	0.039,0.05,0.0	1.0,0.524,1.0	-0.812
ENSG00000104064	GABPB1	15	-	50601887	50601995	50596162	50596330	50647181	50647605	0,1,4	8,10,9	4,2,3	1,0,0	172	86	0.000327025	0.00563002	0.0,0.048,0.182	0.667,1.0,1.0	-0.812
ENSG00000188342	GTF2F2	13	+	45781558	45781640	45710867	45710941	45827005	45827105	15,10,13	28,34,49	17,19,15	1,0,0	131	67	0	0	0.215,0.131,0.119	0.897,1.0,1.0	-0.811
ENSG00000138756	BMP2K	4	+	79808327	79808438	79793767	79793952	79831763	79833339	4,3,5	11,17,13	34,26,36	0,1,2	172	86	0	0	0.154,0.081,0.161	1.0,0.929,0.9	-0.811
ENSG00000006634	DBF4	7	+	87507367	87507448	87505848	87506093	87514293	87514473	18,20,12	121,92,88	41,24,37	1,3,2	148	86	0	0	0.08,0.112,0.073	0.96,0.823,0.915	-0.811
ENSG00000166986	MARS	12	+	57906085	57906136	57905790	57905886	57906533	57906747	18,14,11	99,95,65	33,32,32	3,1,1	88	86	0	0	0.151,0.126,0.142	0.915,0.969,0.969	-0.811
ENSG00000128944	C15orf23	15	+	40683693	40683755	40682036	40682130	40684149	40684224	0,1,1	46,46,39	8,7,5	2,2,0	92	68	3.55271e-15	2.60773e-13	0.0,0.016,0.019	0.747,0.721,1.0	-0.811
ENSG00000083312	TNPO1	5	+	72187636	72187723	72185612	72185784	72189203	72189362	22,29,27	76,107,76	5,4,11	0,0,1	160	86	1.51228e-10	7.0908e-09	0.135,0.127,0.16	1.0,1.0,0.855	-0.811
ENSG00000213079	SCAF8	6	+	155123104	155123281	155116142	155116273	155124677	155124757	7,4,7	54,79,45	7,6,3	0,0,1	159	73	8.83653e-10	3.77243e-08	0.056,0.023,0.067	1.0,1.0,0.579	-0.811
ENSG00000175166	PSMD2	3	+	184025401	184025496	184024538	184024622	184025677	184025804	7,8,8	37,32,28	6,5,9	1,0,0	163	77	2.64695e-09	1.06398e-07	0.082,0.106,0.119	0.739,1.0,1.0	-0.811
ENSG00000204392	LSM2	6	-	31773851	31773919	31766253	31766284	31774531	31774761	2,2,1	17,11,11	3,7,6	0,2,0	61	24	3.70086e-06	9.52673e-05	0.044,0.067,0.035	1.0,0.579,1.0	-0.811
ENSG00000136715	SAP130	2	-	128750760	128750882	128747137	128747440	128753923	128754065	0,1,0	8,7,10	5,2,5	0,1,0	172	86	5.14949e-05	0.00106434	0.0,0.067,0.0	1.0,0.5,1.0	-0.811
ENSG00000130827	PLXNA3	X	+	153698030	153698127	153697721	153697825	153698319	153698510	1,1,0	3,5,4	5,4,4	0,0,1	172	86	0.00103424	0.0156899	0.143,0.091,0.0	1.0,1.0,0.667	-0.811
ENSG00000114850	SSR3	3	-	156271443	156271570	156266693	156266792	156272745	156272906	64,62,59	140183139	56,58,62	0,1,1	172	86	0	0	0.186,0.145,0.175	1.0,0.967,0.969	-0.81
ENSG00000183291	RP4-604K5.1	1	-	87333735	87333785	87328983	87329288	87368963	87369131	6,7,13	196229216	10,17,16	4,1,2	86	86	0	0	0.03,0.03,0.057	0.714,0.944,0.889	-0.81
ENSG00000160299	PCNT	21	+	47864606	47864734	47860767	47860997	47865196	47865682	0,1,0	22,20,25	7,8,9	2,0,1	172	86	1.28575e-12	7.39992e-11	0.0,0.024,0.0	0.636,1.0,0.818	-0.81
ENSG00000137497	NUMA1	11	-	71721831	71721900	71720313	71720433	71723940	71727306	7,7,4	45,30,38	6,8,6	0,2,0	124	86	4.42359e-10	1.9507e-08	0.097,0.139,0.068	1.0,0.735,1.0	-0.81
ENSG00000113048	MRPS27	5	-	71609907	71609985	71593458	71593529	71615975	71616088	1,3,2	15,19,16	6,6,10	1,0,1	120	64	5.85895e-10	2.5574e-08	0.034,0.078,0.063	0.762,1.0,0.842	-0.81
ENSG00000187778	MCRS1	12	-	49953235	49953318	49952625	49952753	49953511	49953604	7,4,4	34,32,22	4,3,4	0,0,1	152	86	9.79771e-07	2.76889e-05	0.104,0.066,0.093	1.0,1.0,0.694	-0.81
ENSG00000176853	FAM91A1	8	+	124817506	124817579	124812011	124812125	124818319	124818469	1,9,1	7,17,9	10,4,8	0,0,1	132	86	1.09909e-06	3.06778e-05	0.085,0.256,0.068	1.0,1.0,0.839	-0.81
ENSG00000106554	CHCHD3	7	-	132754901	132754989	132709305	132709387	132766616	132766800	6,7,13	44,47,62	15,17,13	2,0,1	151	75	0	0	0.063,0.069,0.094	0.788,1.0,0.866	-0.809
ENSG00000082014	SMARCD3	7	-	150938962	150939064	150937985	150938739	150939222	150939318	7,9,7	23,26,32	24,15,18	1,1,0	172	86	0	0	0.132,0.148,0.099	0.923,0.882,1.0	-0.809
ENSG00000100353	EIF3D	22	-	36913347	36913478	36912751	36912837	36915451	36915584	12,22,12	49,64,33	19,14,12	2,0,0	165	79	3.33067e-16	2.64431e-14	0.105,0.141,0.148	0.82,1.0,1.0	-0.809
ENSG00000162694	EXTL2	1	-	101342349	101342420	101339111	101339986	101343031	101343459	4,4,2	42,30,38	5,6,6	0,1,1	128	86	1.32686e-11	6.91701e-10	0.06,0.082,0.034	1.0,0.801,0.801	-0.809
ENSG00000132356	PRKAA1	5	-	40775511	40775605	40767567	40767792	40777546	40777688	0,4,1	15,9,8	4,3,6	1,0,0	172	86	1.6105e-05	0.000369291	0.0,0.182,0.059	0.667,1.0,1.0	-0.809
ENSG00000257076	NA	12	-	123646661	123646765	123645682	123645930	123648496	123648637	0,5,0	12,12,21	2,5,3	0,0,1	172	86	1.65453e-05	0.000377717	0.0,0.172,0.0	1.0,1.0,0.6	-0.809
ENSG00000137804	NUSAP1	15	+	41658013	41658061	41657602	41657787	41663724	41663882	0,0,1	2,1,2	15,40,28	2,1,3	82	86	6.83495e-05	0.00137617	0.0,0.0,0.344	0.887,0.977,0.907	-0.809
ENSG00000110274	CEP164	11	+	117244466	117244547	117241795	117242182	117246423	117246507	1,1,0	9,13,6	4,2,2	0,0,1	139	77	0.00028122	0.00492176	0.058,0.041,0.0	1.0,1.0,0.526	-0.809
ENSG00000182149	IST1	16	+	71958675	71958720	71956376	71956583	71961516	71962130	14,6,13	79,66,61	19,30,21	1,0,2	76	86	0	0	0.167,0.093,0.194	0.956,1.0,0.922	-0.808
ENSG00000183291	RP4-604K5.1	1	-	87346344	87346408	87329199	87329288	87368963	87369131	28,12,13	196229216	20,16,22	4,1,2	110	82	0	0	0.096,0.038,0.043	0.788,0.923,0.891	-0.808
ENSG00000164889	SLC4A2	7	+	150771485	150771575	150771125	150771380	150771761	150771928	10,4,10	57,52,58	32,37,30	0,2,6	166	86	0	0	0.083,0.038,0.082	1.0,0.906,0.721	-0.808
ENSG00000136153	LMO7	13	+	76429395	76429504	76427227	76427524	76430641	76430744	3,7,2	27,20,29	20,20,22	1,2,1	172	86	0	0	0.053,0.149,0.033	0.909,0.833,0.917	-0.808
ENSG00000160710	ADAR	1	-	154558656	154558839	154558228	154558341	154560600	154560734	4,4,6	24,25,14	12,12,12	0,0,2	172	86	1.48586e-11	7.69111e-10	0.077,0.074,0.176	1.0,1.0,0.75	-0.808
ENSG00000116171	SCP2	1	+	53504588	53504718	53480637	53480715	53513529	53513609	9,12,8	28,20,44	9,10,5	0,1,0	144	58	9.01148e-10	3.84449e-08	0.115,0.195,0.068	1.0,0.801,1.0	-0.808
ENSG00000111596	CNOT2	12	+	70726546	70726626	70671911	70672054	70729217	70729283	3,5,2	54,72,74	2,3,3	1,0,0	119	59	7.27092e-08	2.42926e-06	0.027,0.033,0.013	0.498,1.0,1.0	-0.808
ENSG00000124496	TRERF1	6	-	42330734	42330817	42268375	42268487	42418914	42418999	0,1,1	15,21,7	4,3,6	2,0,0	144	78	7.64951e-06	0.000186464	0.0,0.025,0.072	0.52,1.0,1.0	-0.808
ENSG00000102606	ARHGEF7	13	+	111862218	111862349	111806084	111806338	111870025	111870227	1,1,0	2,5,6	5,10,10	1,0,0	172	86	2.35022e-05	0.000520132	0.2,0.091,0.0	0.714,1.0,1.0	-0.808
ENSG00000112685	EXOC2	6	-	576756	576882	572519	572644	592468	592587	0,3,2	5,9,9	4,6,8	0,0,2	172	86	4.87842e-05	0.00101234	0.0,0.143,0.1	1.0,1.0,0.667	-0.808
ENSG00000104375	STK3	8	-	99591891	99592017	99560187	99560389	99761503	99761618	0,2,0	7,12,10	1,2,2	0,1,0	172	86	0.00115244	0.0172995	0.0,0.077,0.0	1.0,0.5,1.0	-0.808
ENSG00000115307	AUP1	2	-	74754597	74754717	74754374	74754490	74754862	74754965	10,4,7	19,23,25	20,27,22	2,0,0	172	86	0	0	0.208,0.08,0.123	0.833,1.0,1.0	-0.807
ENSG00000134987	WDR36	5	+	110459805	110459887	110459502	110459622	110461305	110461493	17,19,14	43,48,37	163125169	2,0,1	150	86	0	0	0.185,0.185,0.178	0.979,1.0,0.99	-0.807
ENSG00000166986	MARS	12	+	57906018	57906136	57905790	57905886	57906533	57906747	27,35,20	99,95,65	56,54,53	3,1,1	172	86	0	0	0.12,0.156,0.133	0.903,0.964,0.964	-0.807
ENSG00000111424	VDR	12	-	48293619	48293741	48272750	48272898	48298737	48298799	3,5,3	24,20,9	55,39,28	1,6,0	141	55	0	0	0.046,0.089,0.115	0.955,0.717,1.0	-0.807
ENSG00000144895	EIF2A	3	+	150280328	150280447	150276174	150276249	150281301	150281401	8,6,9	59,46,52	23,19,18	1,1,2	154	68	0	0	0.056,0.054,0.071	0.91,0.893,0.799	-0.807
ENSG00000102580	DNAJC3	13	+	96412932	96413052	96412293	96412475	96415896	96416002	8,10,13	197210178	4,2,3	0,1,0	172	86	2.52624e-09	1.01907e-07	0.02,0.023,0.035	1.0,0.5,1.0	-0.807
ENSG00000004866	ST7	7	+	116778488	116778586	116771938	116772014	116810915	116811030	13,5,2	25,30,17	6,9,10	1,0,0	155	69	4.73218e-09	1.84613e-07	0.188,0.069,0.05	0.728,1.0,1.0	-0.807
ENSG00000115107	STEAP3	2	+	120012259	120012424	120005254	120005782	120020632	120023228	3,3,4	42,35,32	4,5,10	0,2,0	172	86	5.78265e-09	2.23285e-07	0.034,0.041,0.059	1.0,0.556,1.0	-0.807
ENSG00000160691	SHC1	1	-	154938421	154938553	154934773	154936407	154938637	154938707	6,5,10	36,35,27	7,5,5	0,1,0	149	63	2.84331e-08	1.00385e-06	0.066,0.057,0.135	1.0,0.679,1.0	-0.807
ENSG00000104129	DNAJC17	15	-	41072125	41072195	41071742	41071801	41099566	41099655	0,3,3	39,29,33	2,7,4	1,0,0	88	48	3.92602e-08	1.36216e-06	0.0,0.053,0.047	0.522,1.0,1.0	-0.807
ENSG00000116991	SIPA1L2	1	-	232539870	232539924	232539193	232539317	232551239	232551371	0,0,2	4,2,5	48,38,40	2,6,5	94	86	1.84736e-07	5.81476e-06	0.0,0.0,0.268	0.956,0.853,0.88	-0.807
ENSG00000124151	NCOA3	20	+	46262239	46262380	46256665	46256767	46262791	46262939	0,2,2	14,22,27	3,2,2	0,0,1	172	86	1.73341e-05	0.00039356	0.0,0.043,0.036	1.0,1.0,0.5	-0.807
ENSG00000154640	BTG3	21	-	18983974	18984092	18981324	18981470	18985016	18985263	0,1,1	4,3,2	14,12,13	0,0,2	172	86	4.14167e-05	0.000871662	0.0,0.143,0.2	1.0,1.0,0.765	-0.807
ENSG00000138614	C15orf44	15	-	65885765	65885910	65877107	65877226	65888070	65888163	4,2,4	24,19,15	2,4,2	0,1,0	172	86	4.14388e-05	0.000871902	0.077,0.05,0.118	1.0,0.667,1.0	-0.807
ENSG00000080815	PSEN1	14	+	73614674	73614814	73614502	73614584	73637504	73637715	2,0,2	3,6,4	3,12,3	0,1,0	161	75	0.000310533	0.00538032	0.237,0.0,0.189	1.0,0.848,1.0	-0.807
ENSG00000154305	MIA3	1	+	222822170	222822192	222818895	222819027	222823633	222823722	0,0,5	21,25,20	2,2,1	1,0,0	26	82	0.00187673	0.0266184	0.0,0.0,0.441	0.863,1.0,1.0	-0.807
ENSG00000168374	ARF4	3	-	57570110	57570191	57561349	57561400	57582800	57582950	22,36,32	81,68,51	35,22,23	0,0,1	106	44	0	0	0.101,0.18,0.207	1.0,1.0,0.905	-0.806
ENSG00000101596	SMCHD1	18	+	2778166	2778237	2777803	2777913	2784447	2784619	0,2,1	136187155	6,8,5	1,0,2	128	86	0	0	0.0,0.007,0.004	0.801,1.0,0.627	-0.806
ENSG00000083520	DIS3	13	-	73355426	73355494	73352324	73352518	73355742	73356234	0,2,3	12,25,10	32,22,24	1,3,3	122	86	0	0	0.0,0.053,0.175	0.958,0.838,0.849	-0.806
ENSG00000123983	ACSL3	2	+	223791734	223791907	223789173	223789313	223795338	223795530	1,2,1	21,35,21	7,5,3	1,1,0	172	86	2.16359e-10	9.94246e-09	0.023,0.028,0.023	0.778,0.714,1.0	-0.806
ENSG00000166233	ARIH1	15	+	72848192	72848248	72847611	72847704	72853823	72853890	5,1,1	11,23,19	14,6,4	0,0,1	72	60	4.8824e-09	1.89938e-07	0.275,0.035,0.042	1.0,1.0,0.769	-0.806
ENSG00000187778	MCRS1	12	-	49952996	49953115	49952625	49952753	49953511	49953563	2,1,4	34,32,22	2,2,3	0,0,1	131	45	3.83325e-06	9.84515e-05	0.02,0.011,0.059	1.0,1.0,0.508	-0.806
ENSG00000149532	CPSF7	11	-	61187420	61187566	61183576	61183991	61187941	61188045	2,0,1	16,10,20	3,2,2	0,0,1	172	86	6.05805e-05	0.00123288	0.059,0.0,0.024	1.0,1.0,0.5	-0.806
ENSG00000138794	CASP6	4	-	110612005	110612165	110609897	110610724	110615680	110615856	0,0,2	8,4,3	3,4,3	0,1,0	172	86	0.00161147	0.0232886	0.0,0.0,0.25	1.0,0.667,1.0	-0.806
ENSG00000144228	SPOPL	2	+	139322509	139322563	139322277	139322420	139326505	139326700	19,19,18	64,77,87	39,28,36	0,0,1	94	86	0	0	0.214,0.184,0.159	1.0,1.0,0.971	-0.805
ENSG00000100650	SRSF5	14	+	70236227	70237257	70235320	70235391	70237711	70237822	4,4,10	14,13,15	39,44,29	0,0,2	150	64	0	0	0.109,0.116,0.221	1.0,1.0,0.861	-0.805
ENSG00000106624	AEBP1	7	+	44151804	44151920	44151452	44151649	44152156	44152508	17,12,14	84,77,63	26,27,18	1,0,3	172	86	0	0	0.092,0.072,0.1	0.929,1.0,0.75	-0.805
ENSG00000152795	HNRPDL	4	-	83348585	83348717	83348342	83348457	83349170	83349332	114122115	479531412	69,72,74	3,3,4	172	86	0	0	0.106,0.103,0.122	0.92,0.923,0.902	-0.805
ENSG00000160691	SHC1	1	-	154938421	154938553	154938018	154938257	154938637	154938707	12,10,10	39,39,38	20,12,10	1,1,0	149	63	1.11022e-16	9.06291e-15	0.115,0.098,0.1	0.894,0.835,1.0	-0.805
ENSG00000174695	TMEM167A	5	-	82357695	82357730	82352545	82352973	82360826	82360936	6,11,12	131106126	9,4,5	0,1,1	56	86	1.9984e-15	1.49147e-13	0.066,0.137,0.128	1.0,0.86,0.885	-0.805
ENSG00000134453	RBM17	10	+	6155470	6155544	6154172	6154324	6156011	6156110	8,3,5	20,13,18	14,15,8	1,0,0	134	86	2.28062e-12	1.28234e-10	0.204,0.129,0.151	0.9,1.0,1.0	-0.805
ENSG00000197798	FAM118B	11	+	126131322	126131379	126126461	126126747	126132014	126132526	3,4,5	29,23,16	7,9,6	0,0,1	100	86	2.2056e-10	1.0128e-08	0.082,0.13,0.212	1.0,1.0,0.838	-0.805
ENSG00000129460	NGDN	14	+	23944934	23944987	23944391	23944851	23945237	23945361	1,2,2	9,9,6	12,12,14	1,0,0	92	86	4.41992e-10	1.94978e-08	0.094,0.172,0.238	0.918,1.0,1.0	-0.805
ENSG00000115241	PPM1G	2	-	27609060	27609146	27608613	27608746	27632169	27632180	1,6,6	14,21,21	16,16,11	0,1,0	79	4	6.83048e-10	2.95658e-08	0.004,0.014,0.014	1.0,0.448,1.0	-0.805
ENSG00000147905	ZCCHC7	9	+	37302184	37302228	37120559	37120620	37304184	37304310	0,1,2	12,10,17	3,3,4	0,2,0	42	54	4.63584e-05	0.000967164	0.0,0.114,0.131	1.0,0.659,1.0	-0.805
ENSG00000160949	TONSL	8	-	145659360	145659662	145657667	145657843	145660193	145660272	1,2,1	6,4,7	6,6,3	1,0,0	158	72	0.000142656	0.00267576	0.071,0.186,0.061	0.732,1.0,1.0	-0.805
ENSG00000185532	PRKG1	10	+	54048690	54048753	54048485	54048608	54049983	54050050	1,1,0	5,14,9	3,4,2	0,2,0	86	60	0.000269391	0.00473604	0.122,0.047,0.0	1.0,0.583,1.0	-0.805
ENSG00000197136	PCNXL3	11	+	65385081	65385177	65384720	65384820	65385410	65386538	10,15,16	35,41,39	63,53,52	0,3,1	172	86	0	0	0.125,0.155,0.17	1.0,0.898,0.963	-0.804
ENSG00000138095	LRPPRC	2	-	44123772	44123847	44121683	44121768	44126357	44126423	4,9,8	30,43,23	18,21,27	1,0,3	101	51	0	0	0.063,0.096,0.149	0.901,1.0,0.82	-0.804
ENSG00000111581	NUP107	12	+	69114897	69114957	69113357	69113434	69115620	69115766	44,51,50	191174173	124,102,94	4,0,2	90	70	0	0	0.152,0.186,0.184	0.96,1.0,0.973	-0.804
ENSG00000143436	MRPL9	1	-	151734580	151734631	151733291	151733375	151734851	151734976	5,5,8	27,58,44	10,3,8	1,0,1	79	77	1.06037e-12	6.1684e-11	0.153,0.078,0.151	0.907,1.0,0.886	-0.804
ENSG00000117523	PRRC2C	1	+	171553557	171553665	171553094	171553326	171556141	171556360	6,7,4	19,29,12	11,8,6	0,1,0	172	86	1.35817e-09	5.668e-08	0.136,0.108,0.143	1.0,0.8,1.0	-0.804
ENSG00000110713	NUP98	11	-	3803271	3803375	3800385	3800487	3818629	3818771	3,4,5	25,18,23	6,4,4	0,1,0	172	86	5.31801e-07	1.57289e-05	0.057,0.1,0.098	1.0,0.667,1.0	-0.804
ENSG00000130227	XPO7	8	+	21829386	21829479	21827654	21827821	21832180	21832285	1,1,2	22,15,29	2,3,2	0,0,1	172	86	1.32514e-05	0.000309037	0.022,0.032,0.033	1.0,1.0,0.5	-0.804
ENSG00000174233	ADCY6	12	-	49168184	49168301	49166290	49166326	49169085	49169233	1,2,4	3,3,5	16,8,6	1,0,0	115	29	0.000180436	0.00330423	0.078,0.144,0.168	0.801,1.0,1.0	-0.804
ENSG00000164111	ANXA5	4	-	122592701	122592797	122591108	122591167	122593687	122593781	36,37,51	158187166	78,105,97	7,3,3	138	52	0	0	0.079,0.069,0.104	0.808,0.93,0.924	-0.803
ENSG00000179889	PDXDC1	16	+	15122734	15122823	15116560	15116611	15123807	15123913	3,3,1	17,14,20	16,7,21	0,2,0	122	44	5.07082e-10	2.22195e-08	0.06,0.072,0.018	1.0,0.558,1.0	-0.803
ENSG00000188554	NBR1	17	+	41346366	41346516	41345364	41345655	41346980	41347056	4,3,1	12,6,7	5,8,4	0,1,0	155	69	1.90448e-05	0.000428802	0.129,0.182,0.06	1.0,0.781,1.0	-0.803
ENSG00000115762	PLEKHB2	2	+	131888293	131888333	131884256	131884359	131904209	131905175	4,4,1	32,38,23	2,1,3	1,0,0	66	86	5.25824e-05	0.00108465	0.14,0.121,0.054	0.723,1.0,1.0	-0.803
ENSG00000109452	INPP4B	4	-	143235864	143235915	143226610	143226690	143324090	143324207	1,3,2	14,14,18	3,2,1	1,0,0	75	73	0.000360123	0.00613871	0.065,0.173,0.098	0.745,1.0,1.0	-0.803
ENSG00000132768	DPH2	1	+	44437058	44437742	44436267	44436380	44437829	44438006	0,0,1	8,3,5	4,1,2	0,0,1	172	86	0.00325935	0.0432154	0.0,0.0,0.091	1.0,1.0,0.5	-0.803
ENSG00000160691	SHC1	1	-	154938421	154938556	154938018	154938257	154938637	154938707	17,18,7	39,39,38	23,19,15	1,1,0	149	63	0	0	0.156,0.163,0.072	0.907,0.889,1.0	-0.802
ENSG00000138095	LRPPRC	2	-	44145163	44145272	44139570	44139697	44145394	44145537	7,8,13	41,51,50	14,17,16	2,1,0	172	86	0	0	0.079,0.073,0.115	0.778,0.895,1.0	-0.802
ENSG00000205937	RNPS1	16	-	2312278	2312432	2305585	2305727	2312740	2312843	41,48,54	109,132,82	55,58,57	0,0,1	172	86	0	0	0.158,0.154,0.248	1.0,1.0,0.966	-0.802
ENSG00000090372	STRN4	19	-	47240079	47240158	47236295	47236493	47241420	47241494	0,0,3	30,40,39	9,9,6	3,1,0	125	67	6.4615e-14	4.26726e-12	0.0,0.0,0.04	0.617,0.828,1.0	-0.802
ENSG00000125844	RRBP1	20	-	17600277	17600373	17599240	17599324	17600943	17601015	8,10,6	21,17,19	15,23,13	0,0,1	142	56	1.30007e-13	8.32956e-12	0.131,0.188,0.111	1.0,1.0,0.837	-0.802
ENSG00000170004	CHD3	17	+	7803213	7803351	7802660	7802861	7803607	7803729	3,7,2	19,16,17	6,10,10	0,2,0	172	86	2.04204e-08	7.35987e-07	0.073,0.179,0.056	1.0,0.714,1.0	-0.802
ENSG00000217128	FNIP1	5	-	131014721	131014868	131013289	131013565	131034609	131034695	2,3,1	35,32,40	2,2,2	0,1,0	165	79	4.59996e-06	0.00011658	0.027,0.043,0.012	1.0,0.489,1.0	-0.802
ENSG00000136699	SMPD4	2	-	130914157	130914386	130913607	130913708	130921946	130922018	3,4,4	9,14,20	6,4,2	1,0,0	151	65	1.61086e-05	0.000369305	0.125,0.11,0.079	0.721,1.0,1.0	-0.802
ENSG00000164808	KIAA0146	8	+	48614517	48614577	48614282	48614426	48625223	48625434	0,1,0	15,18,21	4,2,5	0,2,0	106	86	2.80621e-05	0.000611695	0.0,0.043,0.0	1.0,0.448,1.0	-0.802
ENSG00000005156	LIG3	17	+	33323592	33323672	33323082	33323214	33324756	33324844	1,1,0	8,3,8	3,3,5	1,0,0	141	81	0.000253764	0.004492	0.067,0.161,0.0	0.633,1.0,1.0	-0.802
ENSG00000168090	COPS6	7	+	99688524	99688572	99688214	99688277	99688660	99688775	18,13,20	201189176	31,23,30	3,7,1	52	56	0	0	0.088,0.069,0.109	0.918,0.78,0.97	-0.801
ENSG00000100991	TRPC4AP	20	-	33595352	33595443	33594237	33594378	33596466	33596550	0,0,4	15,28,14	16,16,17	0,3,2	159	77	4.88498e-15	3.53971e-13	0.0,0.0,0.122	1.0,0.721,0.805	-0.801
ENSG00000131051	RBM39	20	-	34328446	34328519	34327024	34327469	34328745	34328809	7,5,0	73,84,45	7,7,4	0,1,1	103	57	2.08722e-14	1.43793e-12	0.05,0.032,0.0	1.0,0.795,0.689	-0.801
ENSG00000103657	HERC1	15	-	63928159	63928341	63926161	63926169	63929703	63929842	19,21,23	16,7,9	74,83,80	0,0,1	87	1	1.72709e-09	7.09343e-08	0.013,0.033,0.029	1.0,1.0,0.479	-0.801
ENSG00000005007	UPF1	19	+	18968128	18968342	18966994	18967109	18971129	18971247	5,13,15	71,48,40	6,5,7	0,1,0	172	86	2.31485e-09	9.38669e-08	0.034,0.119,0.158	1.0,0.714,1.0	-0.801
ENSG00000112742	TTK	6	+	80747683	80747764	80746191	80746316	80749412	80749589	8,2,9	23,18,20	7,9,9	0,0,1	148	86	2.91997e-09	1.16731e-07	0.168,0.061,0.207	1.0,1.0,0.839	-0.801
ENSG00000143514	TP53BP2	1	-	223980090	223980224	223976709	223976876	223981004	223981142	5,4,5	31,35,16	6,5,4	0,0,1	172	86	8.71848e-08	2.87053e-06	0.075,0.054,0.135	1.0,1.0,0.667	-0.801
ENSG00000143418	CERS2	1	-	150939867	150939960	150939549	150939678	150940139	150940190	2,5,3	16,20,18	9,8,4	0,2,0	130	44	4.07579e-07	1.22469e-05	0.041,0.078,0.053	1.0,0.575,1.0	-0.801
ENSG00000154553	PDLIM3	4	-	186427675	186427806	186425698	186425740	186456495	186456656	4,7,5	31,21,21	7,5,4	0,1,0	121	35	4.55951e-07	1.36214e-05	0.036,0.088,0.064	1.0,0.591,1.0	-0.801
ENSG00000003756	RBM5	3	+	50147811	50147896	50147035	50147121	50150815	50150977	0,0,1	9,9,2	6,4,5	2,0,0	149	79	6.18464e-05	0.00125577	0.0,0.0,0.21	0.614,1.0,1.0	-0.801
ENSG00000107290	SETX	9	-	135163622	135163738	135161809	135161881	135163936	135164038	1,0,2	29,20,18	2,1,1	1,0,0	151	65	8.64952e-05	0.00170233	0.015,0.0,0.046	0.463,1.0,1.0	-0.801
ENSG00000105135	ILVBL	19	-	15233702	15233841	15233503	15233615	15236466	15236596	0,1,5	13,10,9	2,3,4	0,0,1	172	86	0.000242357	0.00431131	0.0,0.048,0.217	1.0,1.0,0.667	-0.801
ENSG00000143367	TUFT1	1	+	151535060	151535162	151512798	151512902	151536379	151536466	4,16,15	136143120	191166149	17,15,14	166	80	0	0	0.014,0.051,0.057	0.844,0.842,0.837	-0.8
ENSG00000137693	YAP1	11	+	102098199	102098312	102076623	102076805	102100432	102104154	5,7,7	84,86,72	10,4,8	2,0,1	172	86	1.55431e-15	1.16914e-13	0.029,0.039,0.046	0.714,1.0,0.8	-0.8
ENSG00000136068	FLNB	3	+	58141686	58141802	58140336	58140655	58145280	58145418	3,4,0	24,25,26	7,10,9	0,2,1	172	86	2.39508e-12	1.34427e-10	0.059,0.074,0.0	1.0,0.714,0.818	-0.8
ENSG00000165458	INPPL1	11	+	71942541	71942659	71942036	71942233	71943283	71943380	5,4,3	15,15,21	10,17,9	1,1,0	172	86	2.68618e-12	1.50224e-10	0.143,0.118,0.067	0.833,0.895,1.0	-0.8
ENSG00000092203	TOX4	14	+	21960454	21960535	21957331	21957562	21960666	21961416	15,5,6	28,25,28	15,10,7	0,1,0	148	86	1.07243e-11	5.64264e-10	0.237,0.104,0.111	1.0,0.853,1.0	-0.8
ENSG00000109323	MANBA	4	-	103578838	103579057	103571693	103571858	103585841	103586009	11,5,7	31,19,39	6,5,4	1,0,0	172	86	1.95934e-07	6.13774e-06	0.151,0.116,0.082	0.75,1.0,1.0	-0.8
ENSG00000048162	NOP16	5	-	175813840	175813910	175812221	175812328	175815235	175815344	4,0,0	18,11,3	7,4,7	2,0,1	126	86	2.51274e-06	6.61323e-05	0.132,0.0,0.0	0.705,1.0,0.827	-0.8
ENSG00000141027	NCOR1	17	-	15983721	15983823	15983277	15983378	15983920	15984041	0,2,3	25,30,21	2,2,5	0,1,0	172	86	2.89898e-06	7.5642e-05	0.0,0.032,0.067	1.0,0.5,1.0	-0.8
ENSG00000146701	MDH2	7	+	75684147	75684316	75677453	75677544	75687286	75687493	25,28,20	234225177	28,14,23	1,2,2	170	84	0	0	0.05,0.058,0.053	0.933,0.776,0.85	-0.799
ENSG00000244687	UBE2V1	20	-	48700665	48700791	48697660	48699451	48713208	48713357	10,12,11	31,45,40	27,19,23	2,1,0	172	86	0	0	0.139,0.118,0.121	0.871,0.905,1.0	-0.799
ENSG00000213949	ITGA1	5	+	52201592	52201738	52194068	52194213	52204727	52204871	9,17,5	32,39,22	16,19,14	2,0,0	172	86	8.10463e-15	5.78846e-13	0.123,0.179,0.102	0.8,1.0,1.0	-0.799
ENSG00000165801	ARHGEF40	14	+	21551993	21552209	21550402	21550637	21552911	21553082	4,1,1	25,16,38	10,5,8	0,1,1	172	86	1.32627e-12	7.61203e-11	0.074,0.03,0.013	1.0,0.714,0.8	-0.799
ENSG00000115307	AUP1	2	-	74755374	74755448	74755066	74755133	74756258	74756409	5,4,3	17,20,11	8,6,8	0,1,0	108	60	2.24645e-08	8.04996e-07	0.14,0.1,0.132	1.0,0.769,1.0	-0.799
ENSG00000179335	CLK3	15	+	74914460	74914557	74912349	74912566	74917242	74917359	0,1,0	18,15,12	3,3,1	2,0,0	172	86	0.000263707	0.00465089	0.0,0.032,0.0	0.429,1.0,1.0	-0.799
ENSG00000103852	TTC23	15	-	99679521	99679604	99676610	99678332	99696352	99696502	1,0,1	7,4,9	2,3,1	1,0,0	152	86	0.00362904	0.047475	0.075,0.0,0.059	0.531,1.0,1.0	-0.799
ENSG00000130811	EIF3G	19	-	10226154	10226261	10225689	10225805	10226359	10226496	16,26,13	44,40,48	31,23,41	0,0,2	172	86	0	0	0.154,0.245,0.119	1.0,1.0,0.911	-0.798
ENSG00000173692	PSMD1	2	+	232003449	232003564	231949732	231949828	232010953	232011070	54,51,47	137154140	12,20,11	0,0,1	172	86	0	0	0.165,0.142,0.144	1.0,1.0,0.846	-0.798
ENSG00000113758	DBN1	5	-	176894481	176894628	176894255	176894333	176894743	176894818	14,6,7	209185177	22,28,32	2,6,0	139	53	0	0	0.025,0.012,0.015	0.807,0.64,1.0	-0.798
ENSG00000069275	NUCKS1	1	-	205698699	205698749	205696827	205696933	205719084	205719404	25,26,25	120126131	39,37,38	1,2,1	86	86	0	0	0.172,0.171,0.16	0.975,0.949,0.974	-0.798
ENSG00000128708	HAT1	2	+	172803227	172803303	172782046	172782151	172841095	172841247	4,4,2	20,26,32	11,5,12	1,1,0	138	86	4.98823e-13	3.01444e-11	0.111,0.087,0.037	0.873,0.757,1.0	-0.798
ENSG00000141580	WDR45L	17	-	80583264	80583359	80579484	80579675	80585079	80585167	7,17,8	36,26,32	16,10,5	0,1,0	167	81	4.20692e-11	2.07001e-09	0.086,0.241,0.108	1.0,0.829,1.0	-0.798
ENSG00000214265	SNURF	15	+	25219457	25219603	25213078	25213229	25222023	25222176	7,9,7	28,22,36	13,8,7	2,0,0	172	86	2.40595e-10	1.09872e-08	0.111,0.17,0.089	0.765,1.0,1.0	-0.798
ENSG00000170242	USP47	11	+	11971910	11972029	11971435	11971551	11974287	11974418	11,14,15	44,44,35	12,9,3	0,1,0	172	86	2.78282e-10	1.25974e-08	0.111,0.137,0.176	1.0,0.818,1.0	-0.798
ENSG00000086758	HUWE1	X	-	53575919	53576466	53574633	53575234	53577626	53577729	3,4,2	20,15,18	7,11,7	2,0,0	172	86	2.73206e-08	9.68417e-07	0.07,0.118,0.053	0.636,1.0,1.0	-0.798
ENSG00000158669	AGPAT6	8	+	41470363	41470479	41455810	41456823	41471904	41471960	6,4,5	36,46,44	7,4,3	0,0,1	135	49	7.90937e-08	2.62636e-06	0.057,0.031,0.04	1.0,1.0,0.521	-0.798
ENSG00000004455	AK2	1	-	33486967	33487062	33480122	33480195	33487193	33487304	15,16,9	47,64,50	5,1,5	0,0,1	152	66	2.43561e-06	6.43609e-05	0.122,0.098,0.072	1.0,1.0,0.685	-0.798
ENSG00000117335	CD46	1	+	207963597	207963690	207959000	207959027	207966863	207967218	5,5,4	15,11,10	7,6,8	0,0,1	106	20	4.95284e-06	0.000124711	0.059,0.079,0.07	1.0,1.0,0.602	-0.798
ENSG00000119979	FAM45A	10	+	120879852	120879964	120877030	120877179	120889026	120889058	1,0,5	13,13,17	2,1,4	0,0,1	111	25	0.000112268	0.00215314	0.017,0.0,0.062	1.0,1.0,0.474	-0.798
ENSG00000117410	ATP6V0B	1	+	44441336	44441520	44440631	44440779	44441761	44441845	1,3,0	3,4,5	8,5,1	1,0,0	163	77	0.00188147	0.0266766	0.136,0.262,0.0	0.791,1.0,1.0	-0.798
ENSG00000185808	PIGP	21	-	38439561	38439680	38437673	38438012	38441851	38441924	0,1,0	3,3,5	3,5,5	0,0,2	152	66	0.00329122	0.0435963	0.0,0.126,0.0	1.0,1.0,0.521	-0.798
ENSG00000109113	RAB34	17	-	27041810	27041918	27041298	27041728	27042049	27042140	11,5,7	72,95,74	28,31,23	4,3,1	170	84	0	0	0.07,0.025,0.045	0.776,0.836,0.919	-0.797
ENSG00000154642	C21orf91	21	-	19167524	19167587	19161283	19165898	19168898	19169435	5,4,7	19,21,24	26,21,24	3,0,0	112	86	0	0	0.168,0.128,0.183	0.869,1.0,1.0	-0.797
ENSG00000087586	AURKA	20	-	54945540	54945715	54944444	54945396	54956488	54956627	5,6,6	14,22,21	28,31,37	0,2,2	172	86	0	0	0.152,0.12,0.125	1.0,0.886,0.902	-0.797
ENSG00000122692	SMU1	9	-	33053120	33053288	33048103	33048256	33056110	33056237	4,5,8	54,63,36	9,13,11	0,5,0	172	86	3.54137e-11	1.75361e-09	0.036,0.038,0.1	1.0,0.565,1.0	-0.797
ENSG00000122515	ZMIZ2	7	+	44802479	44802585	44801293	44801504	44802854	44803012	2,3,5	8,17,19	14,15,8	3,0,0	172	86	2.45142e-09	9.90856e-08	0.111,0.081,0.116	0.7,1.0,1.0	-0.797
ENSG00000163785	RYK	3	-	133894452	133894612	133878126	133878217	133894773	133894883	2,4,3	6,15,6	4,11,6	0,1,0	170	84	1.57958e-06	4.30376e-05	0.141,0.116,0.198	1.0,0.845,1.0	-0.797
ENSG00000099917	MED15	22	+	20929399	20929519	20922807	20922918	20937126	20937254	11,4,14	25,14,20	71,69,96	1,0,1	172	86	0	0	0.18,0.125,0.259	0.973,1.0,0.98	-0.796
ENSG00000196531	NACA	12	-	57118235	57118333	57108385	57108471	57119046	57119138	30,27,27	68,91,77	23,22,31	1,1,0	164	78	0	0	0.173,0.124,0.143	0.916,0.913,1.0	-0.796
ENSG00000139637	C12orf10	12	+	53699691	53699844	53693876	53694046	53700463	53700645	6,4,4	27,55,43	6,9,6	0,1,1	172	86	6.05738e-13	3.61904e-11	0.1,0.035,0.044	1.0,0.818,0.75	-0.796
ENSG00000120685	PROSER1	13	-	39596462	39596549	39591636	39591681	39597188	39597267	2,8,5	20,26,17	5,15,5	1,0,0	98	24	1.15495e-07	3.72964e-06	0.024,0.07,0.067	0.55,1.0,1.0	-0.796
ENSG00000051341	POLQ	3	-	121190836	121191011	121187151	121187278	121195386	121195580	0,2,0	4,6,12	9,10,9	1,2,0	172	86	2.77476e-07	8.51639e-06	0.0,0.143,0.0	0.818,0.714,1.0	-0.796
ENSG00000153066	TXNDC11	16	-	11827837	11827935	11791980	11792181	11829872	11830089	7,6,11	49,67,49	3,3,4	1,0,0	172	86	6.93621e-07	2.01089e-05	0.067,0.043,0.101	0.6,1.0,1.0	-0.796
ENSG00000064012	CASP8	2	+	202141549	202141691	202137360	202137499	202149538	202150040	2,1,0	12,14,12	4,4,4	0,0,2	172	86	2.77517e-05	0.000605459	0.077,0.034,0.0	1.0,1.0,0.5	-0.796
ENSG00000070770	CSNK2A2	16	-	58220658	58220760	58201588	58201699	58230636	58230748	10,11,6	73,51,57	2,3,1	0,1,0	172	86	2.829e-05	0.000616374	0.064,0.097,0.05	1.0,0.6,1.0	-0.796
ENSG00000184634	MED12	X	+	70342049	70342196	70341411	70341666	70342357	70342457	4,0,2	10,17,8	4,4,3	0,1,0	172	86	3.75266e-05	0.000796795	0.167,0.0,0.111	1.0,0.667,1.0	-0.796
ENSG00000155465	SLC7A7	14	-	23245403	23245527	23242498	23242925	23248001	23248146	0,2,1	12,13,12	1,2,2	0,1,0	172	86	0.000684534	0.0108653	0.0,0.071,0.04	1.0,0.5,1.0	-0.796
ENSG00000080839	RBL1	20	-	35693826	35693876	35690486	35690673	35695126	35695287	1,0,0	8,14,10	2,2,1	0,0,1	86	86	0.00115503	0.0173342	0.111,0.0,0.0	1.0,1.0,0.5	-0.796
ENSG00000172534	HCFC1	X	-	153226992	153227099	153225685	153225865	153227672	153227757	9,11,14	32,23,21	180174175	2,2,2	164	78	0	0	0.118,0.185,0.241	0.977,0.976,0.977	-0.795
ENSG00000198121	LPAR1	9	-	113735760	113735838	113734352	113734500	113800446	113800738	8,11,4	27,24,21	21,20,10	0,0,1	142	86	5.55112e-16	4.31905e-14	0.152,0.217,0.103	1.0,1.0,0.858	-0.795
ENSG00000085377	PREP	6	-	105733360	105733455	105730325	105730457	105736632	105736769	4,5,4	26,17,20	12,12,9	1,0,1	172	86	8.49543e-13	4.99565e-11	0.071,0.128,0.091	0.857,1.0,0.818	-0.795
ENSG00000072042	RDH11	14	-	68151731	68151921	68144109	68145140	68162346	68162531	2,2,0	30,36,27	8,7,4	2,1,0	172	86	5.32929e-12	2.89078e-10	0.032,0.027,0.0	0.667,0.778,1.0	-0.795
ENSG00000101290	CDS2	20	+	5167332	5167485	5166403	5166472	5169712	5169832	6,4,2	10,13,5	11,13,10	0,1,0	148	62	2.80807e-08	9.92252e-07	0.201,0.114,0.144	1.0,0.845,1.0	-0.795
ENSG00000164535	DAGLB	7	-	6472467	6472590	6470110	6470238	6485583	6485735	3,5,0	37,31,31	5,6,6	0,3,0	172	86	7.92509e-08	2.63088e-06	0.039,0.075,0.0	1.0,0.5,1.0	-0.795
ENSG00000152894	PTPRK	6	-	128643183	128643455	128563665	128563747	128718710	128718833	2,7,4	23,23,16	4,7,9	1,0,0	161	75	8.4793e-08	2.7977e-06	0.039,0.124,0.104	0.651,1.0,1.0	-0.795
ENSG00000115839	RAB3GAP1	2	+	135920124	135920221	135911218	135911446	135920317	135920421	3,4,0	10,5,3	7,10,8	0,0,1	172	86	3.62405e-05	0.000772518	0.13,0.286,0.0	1.0,1.0,0.8	-0.795
ENSG00000163918	RFC4	3	-	186510278	186510399	186509513	186509639	186510592	186510736	1,0,1	5,3,1	17,14,11	2,0,0	172	86	5.49579e-05	0.00112823	0.091,0.0,0.333	0.81,1.0,1.0	-0.795
ENSG00000085449	WDFY1	2	-	224758950	224759056	224749364	224749466	224763674	224763787	5,3,2	19,30,19	2,2,3	0,0,1	172	86	6.28084e-05	0.00127427	0.116,0.048,0.05	1.0,1.0,0.6	-0.795
ENSG00000135213	POM121C	7	-	75055643	75055735	75054917	75054991	75066792	75066964	4,5,6	97120101	7,8,5	1,0,1	151	67	0	0	0.018,0.018,0.026	0.756,1.0,0.689	-0.794
ENSG00000082153	BZW1	2	+	201680389	201680484	201680063	201680240	201681047	201681113	52,53,36	116126124	31,30,34	2,1,0	145	59	0	0	0.154,0.146,0.106	0.863,0.924,1.0	-0.794
ENSG00000102225	CDK16	X	+	47083783	47083917	47082950	47083158	47084016	47084139	11,11,10	23,25,31	12,17,18	0,1,0	172	86	3.21965e-15	2.37305e-13	0.193,0.18,0.139	1.0,0.895,1.0	-0.794
ENSG00000221926	TRIM16	17	-	15546034	15546130	15539349	15539583	15554404	15555260	4,6,3	37,26,22	3,6,4	1,0,0	172	86	6.64313e-07	1.93041e-05	0.051,0.103,0.064	0.6,1.0,1.0	-0.794
ENSG00000168944	CEP120	5	-	122720644	122720827	122718679	122718776	122722211	122722361	1,5,2	25,18,12	3,3,2	1,0,0	172	86	4.91222e-05	0.00101868	0.02,0.122,0.077	0.6,1.0,1.0	-0.794
ENSG00000020922	MRE11A	11	-	94225947	94226063	94223998	94224131	94226849	94226978	0,3,1	9,8,8	3,6,7	0,2,0	172	86	6.51556e-05	0.00131866	0.0,0.158,0.059	1.0,0.6,1.0	-0.794
ENSG00000020922	MRE11A	11	-	94225947	94226072	94223998	94224131	94226849	94226979	0,3,1	9,8,8	2,6,8	0,2,0	172	86	7.64521e-05	0.00152522	0.0,0.158,0.059	1.0,0.6,1.0	-0.794
ENSG00000132613	MTSS1L	16	-	70698500	70698666	70697579	70698352	70698822	70698999	3,2,7	30,18,36	9,9,12	0,1,2	172	86	5.24469e-13	3.15716e-11	0.048,0.053,0.089	1.0,0.818,0.75	-0.793
ENSG00000113328	CCNG1	5	+	162869050	162869149	162868083	162868337	162869379	162869574	4,7,2	21,21,14	9,9,12	0,1,1	172	86	3.87033e-11	1.90967e-09	0.087,0.143,0.067	1.0,0.818,0.857	-0.793
ENSG00000148843	PDCD11	10	+	105160153	105160285	105158172	105158285	105162874	105163042	6,5,3	17,9,12	9,11,12	0,0,1	172	86	2.65499e-09	1.06652e-07	0.15,0.217,0.111	1.0,1.0,0.857	-0.793
ENSG00000138381	ASNSD1	2	+	190530101	190530177	190526188	190526336	190530766	190532322	7,7,6	39,48,21	4,4,10	1,0,0	138	86	6.52378e-09	2.50349e-07	0.101,0.083,0.151	0.714,1.0,1.0	-0.793
ENSG00000112659	CUL9	6	+	43154983	43155177	43153692	43154193	43155450	43155856	1,3,2	24,25,21	6,8,2	0,4,0	172	86	2.17437e-06	5.7962e-05	0.02,0.057,0.045	1.0,0.5,1.0	-0.793
ENSG00000149532	CPSF7	11	-	61178409	61178577	61170202	61172176	61179240	61179409	2,4,4	7,11,12	10,8,2	0,1,0	172	86	2.49225e-06	6.56763e-05	0.125,0.154,0.143	1.0,0.8,1.0	-0.793
ENSG00000157654	PALM2-AKAP2	9	+	112704965	112705661	112687340	112687362	112778233	112778319	2,3,4	2,3,2	25,24,31	1,0,0	94	8	0.000409887	0.00688332	0.078,0.078,0.145	0.68,1.0,1.0	-0.793
ENSG00000115464	USP34	2	-	61449753	61449798	61448636	61448741	61450194	61450299	0,0,4	6,3,7	1,3,8	0,1,0	76	86	0.00277758	0.0376375	0.0,0.0,0.393	1.0,0.772,1.0	-0.793
ENSG00000126602	TRAP1	16	-	3722700	3722821	3715971	3716119	3724339	3724495	8,10,16	42,51,61	16,20,7	1,0,1	172	86	0	0	0.087,0.089,0.116	0.889,1.0,0.778	-0.792
ENSG00000151465	CDC123	10	+	12240703	12240775	12237964	12238318	12251965	12252023	11,13,7	35,34,38	25,21,13	1,2,0	95	51	0	0	0.144,0.17,0.09	0.931,0.849,1.0	-0.792
ENSG00000113552	GNPDA1	5	-	141387363	141387465	141385708	141385891	141391476	141391606	29,29,21	112,90,116	51,53,35	3,1,3	172	86	0	0	0.115,0.139,0.083	0.895,0.964,0.854	-0.792
ENSG00000100941	PNN	14	+	39646796	39646891	39646615	39646688	39648294	39648450	9,11,16	51,74,48	11,8,8	0,0,2	152	66	2.2464e-10	1.0304e-08	0.071,0.061,0.126	1.0,1.0,0.635	-0.792
ENSG00000168214	RBPJ	4	+	26432040	26432144	26431519	26431675	26432313	26433278	3,3,3	107,67,82	3,5,3	0,0,2	172	86	6.76547e-09	2.58826e-07	0.014,0.022,0.018	1.0,1.0,0.429	-0.792
ENSG00000165283	STOML2	9	-	35102682	35102820	35101900	35101959	35103046	35103130	7,8,5	12,18,15	10,4,7	1,0,0	129	43	1.00554e-06	2.83334e-05	0.163,0.129,0.1	0.769,1.0,1.0	-0.792
ENSG00000074319	TSG101	11	-	18528403	18528470	18524032	18524124	18531088	18531212	1,3,1	8,8,7	9,8,4	2,0,0	119	85	7.75449e-06	0.000188764	0.082,0.211,0.093	0.763,1.0,1.0	-0.792
ENSG00000110092	CCND1	11	+	69457798	69458014	69455932	69456279	69462761	69462910	3,5,1	7,10,10	7,4,8	0,0,1	172	86	8.29715e-06	0.000200991	0.176,0.2,0.048	1.0,1.0,0.8	-0.792
ENSG00000166889	PATL1	11	-	59406764	59406856	59404188	59405884	59410352	59410508	5,15,10	45,46,47	3,4,1	0,1,0	170	86	2.45079e-05	0.00054114	0.053,0.142,0.097	1.0,0.669,1.0	-0.792
ENSG00000115183	TANC1	2	+	160031463	160031695	160028631	160028783	160032862	160033029	1,2,3	34,49,15	2,1,1	1,0,0	172	86	7.11889e-05	0.00142938	0.014,0.02,0.091	0.5,1.0,1.0	-0.792
ENSG00000163808	KIF15	3	+	44854566	44854672	44853673	44853781	44856402	44856568	2,2,0	5,7,4	4,5,6	1,0,0	172	86	0.0003882	0.00656517	0.167,0.125,0.0	0.667,1.0,1.0	-0.792
ENSG00000145996	CDKAL1	6	+	20955649	20955816	20781375	20781496	21000457	21000603	2,8,0	7,4,8	1,1,1	0,0,0	172	86	0.00332553	0.0439992	0.125,0.5,0.0	1.0,1.0,1.0	-0.792
ENSG00000196262	PPIA	7	+	44839300	44839473	44838845	44838876	44840885	44841229	380374353	526511397	227272263	7,1,3	110	24	0	0	0.136,0.138,0.162	0.876,0.983,0.95	-0.791
ENSG00000163714	U2SURP	3	+	142742816	142742860	142741694	142741906	142745990	142746095	1,0,0	59,47,52	11,10,17	1,5,6	74	86	0	0	0.019,0.0,0.0	0.927,0.699,0.767	-0.791
ENSG00000144426	NBEAL1	2	+	203980707	203980793	203977737	203978041	203986976	203987066	0,3,4	8,13,3	17,9,21	1,0,0	155	83	9.12954e-08	2.99557e-06	0.0,0.11,0.417	0.901,1.0,1.0	-0.791
ENSG00000156976	EIF4A2	3	+	186506098	186506209	186505102	186505373	186506913	186507080	5,10,1	26,21,32	9,4,4	0,0,1	172	86	2.26155e-07	7.02258e-06	0.088,0.192,0.015	1.0,1.0,0.667	-0.791
ENSG00000067182	TNFRSF1A	12	-	6442234	6442313	6440018	6440092	6442532	6442682	9,14,18	31,31,35	18,20,18	0,1,0	125	67	0	0	0.135,0.195,0.216	1.0,0.915,1.0	-0.79
ENSG00000088766	CRLS1	20	+	6011930	6012016	5990420	5990558	6012657	6012726	10,5,5	58,72,50	18,17,19	3,1,1	134	62	0	0	0.074,0.031,0.044	0.735,0.887,0.898	-0.79
ENSG00000144642	RBMS3	3	+	29476236	29476406	29322472	29323247	29529931	29529990	4,3,22	27,13,12	28,27,28	0,1,0	138	52	5.55223e-12	3.00777e-10	0.053,0.08,0.409	1.0,0.911,1.0	-0.79
ENSG00000197302	ZNF720	16	+	31765086	31765221	31724613	31724756	31803950	31804051	3,0,6	5,5,8	14,15,15	1,0,0	172	86	6.47322e-07	1.885e-05	0.231,0.0,0.273	0.875,1.0,1.0	-0.79
ENSG00000123240	OPTN	10	+	13167945	13168039	13164384	13164487	13169744	13169903	2,2,3	12,8,7	11,3,6	2,0,0	172	86	9.94038e-06	0.000237106	0.077,0.111,0.176	0.733,1.0,1.0	-0.79
ENSG00000049618	ARID1B	6	+	157471860	157471987	157469923	157470085	157488173	157488319	3,0,0	2,2,2	19,8,23	0,1,0	172	86	0.000462588	0.00766886	0.429,0.0,0.0	1.0,0.8,1.0	-0.79
ENSG00000204084	INPP5B	1	-	38351309	38351497	38348478	38348590	38352559	38352676	1,1,1	4,9,7	2,3,1	0,1,0	172	86	0.00361195	0.0472862	0.111,0.053,0.067	1.0,0.6,1.0	-0.79
ENSG00000104866	PPP1R37	19	+	45643493	45643539	45596217	45596785	45643763	45643864	8,11,5	135123133	11,9,12	2,2,2	78	86	0	0	0.061,0.09,0.04	0.858,0.832,0.869	-0.789
ENSG00000146731	CCT6A	7	+	56128499	56128633	56127961	56128109	56129439	56129542	35,49,39	100,104,93	69,63,63	1,1,2	172	86	0	0	0.149,0.191,0.173	0.972,0.969,0.94	-0.789
ENSG00000122550	KLHL7	7	+	23163395	23163498	23146274	23146413	23164306	23164400	9,10,5	24,23,17	11,10,16	0,1,0	172	86	9.07019e-12	4.80072e-10	0.158,0.179,0.128	1.0,0.833,1.0	-0.789
ENSG00000157837	SPPL3	12	-	121248611	121248689	121229271	121229360	121341647	121342174	0,2,0	14,8,24	5,3,5	1,0,1	138	82	8.31702e-08	2.75071e-06	0.0,0.129,0.0	0.748,1.0,0.748	-0.789
ENSG00000162601	MYSM1	1	-	59154709	59154788	59150824	59150923	59156011	59156066	5,0,0	59,56,38	4,2,6	0,0,4	106	48	1.58533e-07	5.01664e-06	0.037,0.0,0.0	1.0,1.0,0.404	-0.789
ENSG00000009413	REV3L	6	-	111686467	111686547	111685055	111685181	111688317	111689231	6,4,5	26,12,20	7,6,4	0,1,0	146	86	2.1125e-07	6.58439e-06	0.12,0.164,0.128	1.0,0.779,1.0	-0.789
ENSG00000105663	MLL4	19	+	36227986	36228164	36227812	36227887	36228536	36228644	13,11,8	54,55,34	5,8,3	0,2,0	154	68	3.01961e-07	9.2224e-06	0.096,0.081,0.094	1.0,0.638,1.0	-0.789
ENSG00000117625	RCOR3	1	+	211477424	211477482	211462519	211462738	211486765	211487933	5,13,4	43,54,33	1,3,3	0,1,0	102	86	3.81405e-05	0.000808313	0.089,0.169,0.093	1.0,0.717,1.0	-0.789
ENSG00000067596	DHX8	17	+	41573548	41573636	41571050	41571254	41576229	41576327	5,2,2	11,20,14	4,2,2	1,0,0	162	86	0.000168712	0.00311426	0.194,0.05,0.07	0.68,1.0,1.0	-0.789
ENSG00000126773	C14orf135	14	+	60574303	60575045	60558636	60559137	60582436	60582537	14,15,19	48,56,38	125,66,71	2,3,3	172	86	0	0	0.127,0.118,0.2	0.969,0.917,0.922	-0.788
ENSG00000039560	RAI14	5	+	34812284	34812313	34811871	34812050	34813678	34813765	0,2,1	7,7,6	9,11,12	0,0,0	38	80	1.25028e-07	4.01561e-06	0.0,0.376,0.26	1.0,1.0,1.0	-0.788
ENSG00000177570	SAMD12	8	-	119592953	119593132	119452070	119452200	119634042	119634132	3,4,6	11,22,11	11,7,3	0,1,0	169	83	2.6785e-07	8.23718e-06	0.118,0.082,0.211	1.0,0.775,1.0	-0.788
ENSG00000116521	SCAMP3	1	-	155226464	155226582	155225769	155226210	155228616	155228706	3,2,5	10,13,9	7,5,10	1,0,0	169	83	9.40854e-07	2.66921e-05	0.128,0.07,0.214	0.775,1.0,1.0	-0.788
ENSG00000165782	TMEM55B	14	-	20927364	20927455	20925877	20926861	20927546	20927599	4,2,2	7,17,10	5,8,9	1,0,0	128	46	1.17894e-06	3.27377e-05	0.17,0.041,0.067	0.642,1.0,1.0	-0.788
ENSG00000140367	UBE2Q2	15	+	76168527	76168612	76165768	76165909	76170301	76170362	0,0,1	4,5,4	5,3,8	1,0,1	124	54	0.000212061	0.00382429	0.0,0.0,0.098	0.685,1.0,0.777	-0.788
ENSG00000157800	SLC37A3	7	-	140043211	140043363	140037083	140037149	140055467	140055564	1,0,2	9,8,18	2,2,1	0,1,0	145	59	0.000856614	0.0132709	0.043,0.0,0.043	1.0,0.449,1.0	-0.788
ENSG00000116574	RHOU	1	+	228873419	228873478	228870823	228871751	228879031	228882416	6,2,4	34,42,41	11,13,14	2,3,0	104	86	0	0	0.127,0.038,0.075	0.82,0.782,1.0	-0.787
ENSG00000132341	RAN	12	+	131357380	131357465	131356617	131356671	131357547	131357673	61,70,74	185231142	39,43,48	0,2,3	117	47	0	0	0.117,0.109,0.173	1.0,0.896,0.865	-0.787
ENSG00000101557	USP14	18	+	178932	179037	163307	163453	180235	180339	8,8,3	21,25,11	7,11,5	1,0,0	172	86	3.53156e-08	1.23286e-06	0.16,0.138,0.12	0.778,1.0,1.0	-0.787
ENSG00000143322	ABL2	1	-	179086466	179086651	179084012	179084165	179087721	179087899	6,4,3	32,39,13	4,3,4	0,1,0	172	86	2.30848e-06	6.12615e-05	0.086,0.049,0.103	1.0,0.6,1.0	-0.787
ENSG00000183020	AP2A2	11	+	970168	970311	959436	959505	972061	972124	2,1,3	7,11,6	7,5,6	0,1,0	118	32	3.04043e-05	0.000659172	0.072,0.024,0.119	1.0,0.576,1.0	-0.787
ENSG00000100644	HIF1A	14	+	62188456	62188541	62188226	62188372	62193423	62193536	38,33,46	122,115,73	38,48,58	0,2,1	156	86	0	0	0.147,0.137,0.258	1.0,0.93,0.97	-0.786
ENSG00000175166	PSMD2	3	+	184025401	184025496	184025144	184025313	184025677	184025804	10,10,22	30,30,35	17,15,19	0,1,0	172	86	9.99201e-16	7.6312e-14	0.143,0.143,0.239	1.0,0.882,1.0	-0.786
ENSG00000112701	SENP6	6	+	76423228	76423297	76421043	76421132	76423390	76423541	6,13,11	54,55,38	7,9,10	0,1,1	120	82	1.90847e-13	1.20417e-11	0.071,0.139,0.165	1.0,0.86,0.872	-0.786
ENSG00000165637	VDAC2	10	+	76977645	76977749	76971987	76972056	76978820	76978973	7,12,6	15,16,18	17,19,18	0,0,1	148	62	7.47957e-13	4.41706e-11	0.164,0.239,0.123	1.0,1.0,0.883	-0.786
ENSG00000104660	LEPROTL1	8	+	29959413	29959489	29952995	29953044	29961815	29962002	7,5,3	33,31,25	8,5,8	1,0,1	94	42	1.10592e-10	5.24872e-09	0.087,0.067,0.051	0.781,1.0,0.781	-0.786
ENSG00000106290	TAF6	7	-	99711238	99711392	99710420	99710540	99711490	99711577	1,3,4	29,21,29	6,8,5	0,1,1	166	80	1.32487e-10	6.25209e-09	0.016,0.064,0.062	1.0,0.794,0.707	-0.786
ENSG00000006634	DBF4	7	+	87516643	87516713	87516158	87516209	87517297	87517374	5,7,5	9,14,14	8,14,13	0,0,1	68	28	4.30432e-09	1.68873e-07	0.186,0.171,0.128	1.0,1.0,0.843	-0.786
ENSG00000005483	MLL5	7	+	104702610	104702725	104681285	104681470	104703797	104704027	5,9,8	29,38,28	11,4,4	0,1,0	172	86	6.90595e-08	2.31477e-06	0.079,0.106,0.125	1.0,0.667,1.0	-0.786
ENSG00000141564	RPTOR	17	+	78897289	78897473	78882610	78882729	78914295	78914401	3,6,2	20,14,15	8,8,10	0,2,0	172	86	7.47505e-08	2.49411e-06	0.07,0.176,0.063	1.0,0.667,1.0	-0.786
ENSG00000149084	HSD17B12	11	+	43837896	43837941	43836986	43837051	43876264	43876414	8,9,10	86,89,74	2,4,1	1,0,0	48	58	4.19593e-06	0.000106959	0.101,0.109,0.14	0.707,1.0,1.0	-0.786
ENSG00000124222	STX16	20	+	57242545	57242653	57227128	57227143	57245567	57245659	1,8,4	3,1,2	107,105,94	1,0,0	93	7	7.15502e-06	0.000175234	0.024,0.376,0.131	0.89,1.0,1.0	-0.786
ENSG00000128829	EIF2AK4	15	+	40300227	40300396	40299216	40299266	40301814	40301931	2,1,2	5,5,7	8,6,5	0,0,1	129	43	0.000129322	0.00244741	0.118,0.063,0.087	1.0,1.0,0.625	-0.786
ENSG00000241945	PWP2	21	+	45534059	45534159	45533633	45533728	45534505	45534649	0,0,1	12,5,3	4,2,5	0,1,0	172	86	0.000261422	0.00461419	0.0,0.0,0.143	1.0,0.5,1.0	-0.786
ENSG00000113761	ZNF346	5	+	176468778	176468871	176468126	176468230	176489058	176489152	1,3,0	10,5,6	7,3,4	2,0,0	172	86	0.0003889	0.00657433	0.048,0.231,0.0	0.636,1.0,1.0	-0.786
ENSG00000168411	RFWD3	16	-	74671753	74671868	74670243	74670475	74678259	74678351	0,1,2	6,8,3	12,3,4	3,0,0	171	85	0.000396267	0.00668254	0.0,0.058,0.249	0.665,1.0,1.0	-0.786
ENSG00000090989	EXOC1	4	+	56738014	56738124	56737266	56737399	56744082	56744232	1,0,0	3,4,12	2,3,4	1,0,0	172	86	0.000676731	0.0107551	0.143,0.0,0.0	0.5,1.0,1.0	-0.786
ENSG00000108515	ENO3	17	+	4859867	4859976	4859236	4859438	4860125	4860184	0,3,1	13,7,11	3,1,1	1,0,0	138	52	0.00133535	0.0197241	0.0,0.139,0.033	0.531,1.0,1.0	-0.786
ENSG00000106624	AEBP1	7	+	44151740	44151920	44151452	44151649	44152156	44152508	18,11,17	84,77,63	18,15,17	1,0,3	172	86	0	0	0.097,0.067,0.119	0.9,1.0,0.739	-0.785
ENSG00000171456	ASXL1	20	+	30956817	30956926	30954186	30954269	31015930	31016225	8,8,11	15,26,18	40,38,48	0,1,1	162	76	0	0	0.2,0.126,0.223	1.0,0.947,0.957	-0.785
ENSG00000144824	PHLDB2	3	+	111602910	111604259	111578606	111578725	111632165	111632549	2,3,7	31,26,24	6,8,9	1,0,1	172	86	3.26016e-11	1.62146e-09	0.031,0.055,0.127	0.75,1.0,0.818	-0.785
ENSG00000105726	ATP13A1	19	-	19764592	19764703	19763403	19763529	19764777	19764883	9,12,8	31,17,26	7,14,10	0,1,0	172	86	1.71966e-10	8.00587e-09	0.127,0.261,0.133	1.0,0.875,1.0	-0.785
ENSG00000151657	KIN	10	-	7822226	7822270	7822018	7822141	7829782	7829953	0,2,2	8,10,6	4,4,3	1,0,0	74	86	0.000226215	0.00404834	0.0,0.189,0.279	0.823,1.0,1.0	-0.785
ENSG00000163870	TPRA1	3	-	127294591	127294652	127294027	127294108	127295459	127295539	0,0,0	34,20,13	1,3,1	0,4,0	83	61	0.000506971	0.00831512	0.0,0.0,0.0	1.0,0.355,1.0	-0.785
ENSG00000196998	WDR45	X	-	48932794	48932940	48932100	48932571	48933022	48933124	2,0,7	6,4,9	1,7,5	0,1,0	172	86	0.00184203	0.02621	0.143,0.0,0.28	1.0,0.778,1.0	-0.785
ENSG00000006327	TNFRSF12A	16	+	3071215	3071320	3070312	3070492	3071555	3071690	136135171	799788709	157815501640	106121121	172	86	0	0	0.078,0.079,0.108	0.882,0.865,0.871	-0.784
ENSG00000159692	CTBP1	4	-	1231970	1232125	1221986	1222131	1235112	1235251	2,6,3	23,25,24	20,16,10	0,3,1	172	86	1.03251e-14	7.30726e-13	0.042,0.107,0.059	1.0,0.727,0.833	-0.784
ENSG00000066117	SMARCD1	12	+	50488219	50488355	50484275	50484373	50492496	50492598	6,4,6	55,68,49	7,7,5	0,1,1	172	86	3.65152e-13	2.23596e-11	0.052,0.029,0.058	1.0,0.778,0.714	-0.784
ENSG00000167005	NUDT21	16	-	56480537	56480601	56473568	56473658	56481700	56481901	6,3,5	27,26,16	6,11,9	0,1,1	111	83	3.46277e-11	1.71743e-09	0.142,0.079,0.189	1.0,0.892,0.871	-0.784
ENSG00000116171	SCP2	1	+	53493640	53493743	53480609	53480715	53513529	53513609	9,7,8	28,20,44	9,5,7	0,1,0	159	73	1.50245e-08	5.5108e-07	0.129,0.138,0.077	1.0,0.697,1.0	-0.784
ENSG00000111596	CNOT2	12	+	70704674	70704797	70671911	70672054	70729217	70729343	21,24,20	54,72,74	7,5,1	1,0,0	172	86	1.0685e-06	2.99786e-05	0.163,0.143,0.119	0.778,1.0,1.0	-0.784
ENSG00000188342	GTF2F2	13	+	45725821	45725966	45710867	45710941	45827005	45827105	6,6,7	28,34,49	3,3,5	1,0,0	153	67	2.62173e-06	6.88698e-05	0.086,0.072,0.059	0.568,1.0,1.0	-0.784
ENSG00000132017	DCAF15	19	+	14071098	14071203	14070795	14070881	14071751	14072254	1,2,0	7,7,3	6,12,8	1,0,1	165	79	4.63659e-06	0.000117413	0.064,0.12,0.0	0.742,1.0,0.793	-0.784
ENSG00000105856	HBP1	7	+	106826805	106826917	106826245	106826387	106840604	106840746	1,6,6	51,44,38	2,2,3	0,1,0	172	86	8.26499e-06	0.000200251	0.01,0.064,0.073	1.0,0.5,1.0	-0.784
ENSG00000162231	NXF1	11	-	62570890	62571044	62569648	62569732	62571263	62571450	3,0,0	21,13,16	3,1,3	2,0,0	163	77	0.000187883	0.00342447	0.063,0.0,0.0	0.415,1.0,1.0	-0.784
ENSG00000163950	SLBP	4	-	1713600	1713717	1701737	1701797	1713856	1713977	6,2,2	11,9,13	2,4,5	0,0,1	139	53	0.000200147	0.00363047	0.172,0.078,0.055	1.0,1.0,0.656	-0.784
ENSG00000197798	FAM118B	11	+	126104889	126104982	126099118	126099188	126110686	126110939	1,0,2	6,13,8	5,2,4	2,0,0	149	63	0.000246312	0.00437479	0.066,0.0,0.096	0.514,1.0,1.0	-0.784
ENSG00000174996	KLC2	11	+	66033125	66033234	66032638	66032706	66033324	66033483	1,0,3	3,3,7	3,5,4	0,0,1	147	61	0.00317498	0.0422905	0.122,0.0,0.151	1.0,1.0,0.624	-0.784
ENSG00000077147	TM9SF3	10	-	98319415	98319493	98312684	98312816	98321734	98321895	35,32,20	212229181	16,19,23	1,4,1	142	86	0	0	0.091,0.078,0.063	0.906,0.742,0.933	-0.783
ENSG00000073578	SDHA	5	+	230990	231115	227723	228448	233591	233760	6,7,5	83,72,74	18,14,18	7,0,1	172	86	2.22045e-16	1.78565e-14	0.035,0.046,0.033	0.563,1.0,0.9	-0.783
ENSG00000178127	NDUFV2	18	+	9124871	9124981	9122510	9122679	9126828	9126905	21,28,16	50,41,52	13,25,14	0,0,1	156	70	2.22045e-16	1.78565e-14	0.159,0.235,0.121	1.0,1.0,0.863	-0.783
ENSG00000101557	USP14	18	+	192841	192900	180235	180339	196636	196767	3,3,6	56,80,65	8,9,4	1,0,2	104	86	2.82219e-13	1.75576e-11	0.042,0.03,0.071	0.869,1.0,0.623	-0.783
ENSG00000126001	CEP250	20	+	34057714	34057811	34055128	34055380	34059874	34059976	3,3,4	17,12,16	14,14,14	0,1,2	172	86	6.5693e-12	3.52652e-10	0.081,0.111,0.111	1.0,0.875,0.778	-0.783
ENSG00000143624	INTS3	1	+	153736307	153736362	153735708	153735838	153736593	153736697	1,1,1	11,14,11	11,4,3	2,0,1	96	86	3.65278e-07	1.10505e-05	0.075,0.06,0.075	0.831,1.0,0.729	-0.783
ENSG00000107862	GBF1	10	+	104123466	104123555	104123012	104123153	104125153	104125356	7,6,6	23,21,26	4,5,5	0,0,1	164	86	1.84378e-06	4.97676e-05	0.138,0.13,0.108	1.0,1.0,0.724	-0.783
ENSG00000138663	COPS4	4	+	83966778	83966858	83956351	83956451	83978078	83978215	10,5,5	65,51,51	4,3,3	2,0,0	146	86	2.55218e-06	6.70994e-05	0.083,0.055,0.055	0.541,1.0,1.0	-0.783
ENSG00000023902	PLEKHO1	1	+	150128259	150128400	150123101	150123248	150131013	150132260	5,3,3	17,8,9	7,3,2	1,0,0	172	86	7.84381e-05	0.00156084	0.128,0.158,0.143	0.778,1.0,1.0	-0.783
ENSG00000091651	ORC6	16	+	46729473	46729586	46727004	46727094	46729928	46729997	2,1,1	7,3,2	10,7,7	0,1,0	145	59	0.000113916	0.00218273	0.104,0.119,0.169	1.0,0.74,1.0	-0.783
ENSG00000106571	GLI3	7	-	42011935	42012226	42007193	42007521	42063066	42063207	3,2,1	9,8,4	5,2,6	1,0,0	172	86	0.00027934	0.00489506	0.143,0.111,0.111	0.714,1.0,1.0	-0.783
ENSG00000011465	DCN	12	-	91550851	91550965	91546872	91546966	91552072	91552286	50,45,41	96110106	70,69,64	1,1,2	172	86	0	0	0.207,0.17,0.162	0.972,0.972,0.941	-0.782
ENSG00000167548	MLL2	12	-	49441747	49441852	49440042	49440207	49442441	49442552	21,14,13	23,31,35	50,35,47	0,0,0	172	86	0	0	0.313,0.184,0.157	1.0,1.0,1.0	-0.782
ENSG00000131051	RBM39	20	-	34317383	34317449	34312959	34313077	34319862	34320057	49,51,51	156219148	10,10,13	1,0,0	118	86	0	0	0.186,0.145,0.201	0.879,1.0,1.0	-0.782
ENSG00000110958	PTGES3	12	-	57058559	57058584	57057135	57058282	57059987	57060050	8,8,4	133134170	6,7,7	0,2,5	18	56	3.33067e-16	2.64431e-14	0.158,0.157,0.068	1.0,0.916,0.813	-0.782
ENSG00000106346	USP42	7	+	6199080	6199124	6196384	6196686	6200185	6201195	8,6,20	78,81,49	7,5,7	0,1,0	74	86	1.23787e-10	5.85487e-09	0.107,0.079,0.322	1.0,0.853,1.0	-0.782
ENSG00000100697	DICER1	14	-	95579428	95579561	95578508	95578584	95582003	95582158	4,3,5	27,15,26	12,7,6	1,0,1	155	69	1.35132e-10	6.36968e-09	0.062,0.082,0.079	0.842,1.0,0.728	-0.782
ENSG00000186866	POFUT2	21	-	46687504	46687628	46683842	46685550	46689753	46689934	3,2,3	51,52,41	6,5,8	4,0,0	172	86	2.25243e-08	8.06908e-07	0.029,0.019,0.035	0.429,1.0,1.0	-0.782
ENSG00000143740	SNAP47	1	+	227946695	227947186	227923131	227923200	227954659	227954784	4,3,7	13,10,14	5,9,7	0,0,1	148	62	1.686e-06	4.5747e-05	0.114,0.112,0.173	1.0,1.0,0.746	-0.782
ENSG00000118412	CASP8AP2	6	+	90556280	90556363	90539618	90539786	90562884	90562953	2,2,3	5,18,13	4,4,5	1,0,0	128	62	1.53075e-05	0.000352954	0.162,0.051,0.101	0.66,1.0,1.0	-0.782
ENSG00000144674	GOLGA4	3	+	37388683	37388787	37381614	37381690	37396591	37396678	1,5,5	6,12,16	5,3,6	1,0,0	149	63	5.77565e-05	0.00118004	0.066,0.15,0.117	0.679,1.0,1.0	-0.782
ENSG00000137941	TTLL7	1	-	84415547	84415669	84414310	84414378	84417527	84417659	2,1,0	7,2,3	4,5,6	1,0,0	147	61	0.00136512	0.0201042	0.106,0.172,0.0	0.624,1.0,1.0	-0.782
ENSG00000117399	CDC20	1	+	43826790	43826916	43826169	43826264	43827865	43827983	1,3,0	8,2,1	10,9,4	1,0,0	172	86	0.0014378	0.0210402	0.059,0.429,0.0	0.833,1.0,1.0	-0.782
ENSG00000178719	GRINA	8	+	145066045	145066246	145065859	145065972	145066412	145066541	24,9,14	69,79,66	33,40,29	2,3,2	172	86	0	0	0.148,0.054,0.096	0.892,0.87,0.879	-0.781
ENSG00000023902	PLEKHO1	1	+	150129578	150129680	150129104	150129209	150131013	150131823	4,5,12	135132115	24,29,13	0,5,3	172	86	0	0	0.015,0.019,0.05	1.0,0.744,0.684	-0.781
ENSG00000144580	RQCD1	2	+	219457338	219457430	219457026	219457125	219458830	219461021	8,4,4	17,19,20	13,14,11	0,1,1	170	86	3.17768e-12	1.76128e-10	0.192,0.096,0.092	1.0,0.876,0.848	-0.781
ENSG00000106290	TAF6	7	-	99710971	99711028	99710420	99710540	99711490	99711577	6,5,3	29,21,29	8,7,9	0,1,1	94	80	2.02073e-11	1.02928e-09	0.15,0.168,0.081	1.0,0.856,0.885	-0.781
ENSG00000009335	UBE3C	7	+	157046937	157047004	157046647	157046836	157049607	157049738	4,2,3	38,23,42	5,7,12	0,3,1	120	86	1.16789e-10	5.53438e-09	0.07,0.059,0.049	1.0,0.626,0.896	-0.781
ENSG00000172239	PAIP1	5	-	43543105	43543218	43536920	43537046	43547829	43548015	7,5,9	68,81,53	8,6,7	0,3,0	172	86	4.53676e-09	1.77434e-07	0.049,0.03,0.078	1.0,0.5,1.0	-0.781
ENSG00000117153	KLHL12	1	-	202863311	202863410	202862366	202862553	202863718	202863877	4,2,2	9,11,16	5,7,4	0,0,1	172	86	7.71555e-06	0.00018789	0.182,0.083,0.059	1.0,1.0,0.667	-0.781
ENSG00000060982	BCAT1	12	-	25034234	25034345	25002719	25002883	25101860	25101983	4,2,1	17,28,26	1,4,3	0,2,0	172	86	5.55589e-05	0.00113944	0.105,0.034,0.019	1.0,0.5,1.0	-0.781
ENSG00000138771	SHROOM3	4	+	77691778	77692051	77680697	77680848	77699961	77704406	5,4,4	22,28,21	3,2,3	0,0,1	172	86	6.01231e-05	0.00122398	0.102,0.067,0.087	1.0,1.0,0.6	-0.781
ENSG00000138660	AP1AR	4	+	113186164	113186223	113181921	113182018	113186889	113186963	3,2,3	19,15,13	3,3,2	1,0,0	85	67	0.000123922	0.00235632	0.111,0.095,0.154	0.703,1.0,1.0	-0.781
ENSG00000111596	CNOT2	12	+	70713077	70713144	70704674	70704797	70747608	70748773	2,1,2	5,9,7	3,4,6	0,0,1	120	86	0.000132624	0.00250444	0.223,0.074,0.17	1.0,1.0,0.811	-0.781
ENSG00000177479	ARIH2	3	+	48999044	48999112	48964894	48965246	49002351	49002417	1,0,1	2,6,8	3,2,6	0,0,2	95	59	0.00172239	0.0247252	0.237,0.0,0.072	1.0,1.0,0.651	-0.781
ENSG00000134259	NGF	1	-	115836247	115836371	115828538	115829428	115880824	115880857	37,29,31	94,75,62	290269226	7,11,9	112	26	0	0	0.084,0.082,0.104	0.906,0.85,0.854	-0.78
ENSG00000075151	EIF4G3	1	-	21154109	21154191	21151596	21151691	21155639	21155765	0,1,0	14,22,16	6,5,6	1,2,0	150	86	7.12852e-09	2.72046e-07	0.0,0.025,0.0	0.775,0.589,1.0	-0.78
ENSG00000206560	ANKRD28	3	-	15756084	15756163	15755033	15755148	15762421	15762634	0,2,2	61,67,81	4,1,2	0,1,0	144	86	1.67041e-07	5.27916e-06	0.0,0.018,0.015	1.0,0.374,1.0	-0.78
ENSG00000237240	U47924.25	12	-	6959630	6959760	6958728	6959022	6959996	6960173	2,1,3	3,7,7	10,10,6	1,0,0	172	86	8.98228e-06	0.000216242	0.25,0.067,0.176	0.833,1.0,1.0	-0.78
ENSG00000198718	FAM179B	14	+	45494985	45495075	45481177	45481278	45496501	45496677	1,0,1	9,14,4	1,2,4	0,1,0	166	86	0.000600966	0.0096821	0.054,0.0,0.115	1.0,0.509,1.0	-0.78
ENSG00000020426	MNAT1	14	+	61264804	61264878	61262934	61263087	61346431	61346553	0,1,2	8,4,4	2,4,2	0,1,0	134	86	0.00357483	0.0468792	0.0,0.138,0.243	1.0,0.72,1.0	-0.78
ENSG00000129351	ILF3	19	+	10789288	10789380	10787838	10787986	10789772	10789868	5,7,3	11,18,10	16,24,26	1,0,1	170	86	1.39888e-14	9.78886e-13	0.187,0.164,0.132	0.89,1.0,0.929	-0.779
ENSG00000153250	RBMS1	2	-	161174679	161174738	161169666	161169758	161223726	161223902	4,4,5	18,34,17	12,5,8	1,0,1	103	85	4.70183e-11	2.30441e-09	0.155,0.088,0.195	0.908,1.0,0.868	-0.779
ENSG00000101310	SEC23B	20	+	18522939	18523046	18516296	18516386	18523662	18523816	2,8,4	9,12,19	14,16,13	2,0,0	169	83	1.35707e-09	5.66606e-08	0.098,0.247,0.094	0.775,1.0,1.0	-0.779
ENSG00000143398	PIP5K1A	1	+	151210657	151210741	151209033	151209239	151212430	151212515	10,3,2	129122113	5,6,4	4,0,0	146	78	2.86283e-09	1.14742e-07	0.04,0.013,0.009	0.4,1.0,1.0	-0.779
ENSG00000115839	RAB3GAP1	2	+	135815580	135815656	135809999	135810055	135848567	135848700	10,6,5	21,24,11	9,4,9	1,0,0	101	49	8.51718e-08	2.80871e-06	0.188,0.108,0.181	0.814,1.0,1.0	-0.779
ENSG00000075413	MARK3	14	+	103966492	103966537	103958113	103958371	103969218	103969619	1,1,0	3,3,6	16,13,16	0,1,1	76	86	4.97646e-07	1.47678e-05	0.274,0.274,0.0	1.0,0.936,0.948	-0.779
ENSG00000196313	POM121	7	+	72398922	72399003	72397339	72397501	72400477	72400649	11,12,10	41,42,30	6,5,3	1,0,0	148	86	5.99279e-07	1.75743e-05	0.135,0.142,0.162	0.777,1.0,1.0	-0.779
ENSG00000130254	SAFB2	19	-	5616432	5616497	5616142	5616346	5621319	5621407	0,2,2	10,12,16	8,5,1	2,1,0	111	81	4.46305e-06	0.000113294	0.0,0.108,0.084	0.745,0.785,1.0	-0.779
ENSG00000115274	INO80B	2	+	74682928	74683063	74682532	74682725	74683229	74683399	3,5,5	21,9,17	3,5,6	0,0,1	172	86	7.54403e-06	0.000184181	0.067,0.217,0.128	1.0,1.0,0.75	-0.779
ENSG00000104427	ZC2HC1A	8	+	79598701	79598843	79590797	79590914	79601456	79601608	0,3,2	4,5,9	4,4,2	0,1,0	172	86	0.0024198	0.0333005	0.0,0.231,0.1	1.0,0.667,1.0	-0.779
ENSG00000126787	DLGAP5	14	-	55649087	55649150	55647930	55648015	55650277	55650471	7,6,9	23,19,20	25,27,36	0,0,1	104	78	0	0	0.186,0.191,0.252	1.0,1.0,0.964	-0.778
ENSG00000255717	SNHG1	11	-	62622359	62622410	62621990	62622023	62622604	62622688	0,1,1	57,37,31	14,10,18	0,4,2	35	17	0	0	0.0,0.013,0.015	1.0,0.548,0.814	-0.778
ENSG00000130985	UBA1	X	+	47073935	47074036	47073725	47073827	47074192	47074527	12,21,19	49,49,47	22,31,22	0,0,3	172	86	0	0	0.109,0.176,0.168	1.0,1.0,0.786	-0.778
ENSG00000078668	VDAC3	8	+	42252601	42252654	42251727	42251796	42256229	42256382	8,6,6	406453451	16,20,14	5,4,3	68	62	0	0	0.018,0.012,0.012	0.745,0.82,0.81	-0.778
ENSG00000198431	TXNRD1	12	+	104732916	104733051	104728014	104728110	104742130	104742422	12,19,11	33,26,34	11,17,19	0,1,0	172	86	2.44249e-14	1.67711e-12	0.154,0.268,0.139	1.0,0.895,1.0	-0.778
ENSG00000131051	RBM39	20	-	34328446	34328519	34319862	34320057	34328745	34328809	0,2,0	18,18,21	6,7,3	1,0,1	103	57	3.1289e-09	1.24683e-07	0.0,0.058,0.0	0.769,1.0,0.624	-0.778
ENSG00000100503	NIN	14	-	51210960	51211083	51210133	51210247	51214709	51214823	0,4,3	27,25,21	9,5,6	5,0,0	172	86	1.08829e-06	3.04242e-05	0.0,0.074,0.067	0.474,1.0,1.0	-0.778
ENSG00000126012	KDM5C	X	-	53240968	53241088	53240678	53240837	53243870	53244029	3,12,5	30,26,23	4,3,4	0,0,1	172	86	1.546e-05	0.000356075	0.048,0.188,0.098	1.0,1.0,0.667	-0.778
ENSG00000078674	PCM1	8	+	17823836	17823982	17823507	17823727	17824488	17824679	2,2,2	16,20,16	4,5,4	2,0,0	172	86	1.65388e-05	0.000377638	0.059,0.048,0.059	0.5,1.0,1.0	-0.778
ENSG00000137770	CTDSPL2	15	+	44776421	44776560	44751188	44751398	44778748	44778898	3,1,0	6,7,23	3,3,3	0,0,1	172	86	9.67286e-05	0.0018809	0.2,0.067,0.0	1.0,1.0,0.6	-0.778
ENSG00000141736	ERBB2	17	+	37883547	37883800	37883067	37883256	37883941	37884332	3,0,1	3,8,10	2,6,5	0,0,1	172	86	0.000308435	0.00534769	0.333,0.0,0.048	1.0,1.0,0.714	-0.778
ENSG00000133316	WDR74	11	-	62601089	62601146	62600429	62600603	62601263	62601409	1,4,0	5,7,5	5,5,4	0,1,0	100	86	0.000668612	0.0106451	0.147,0.33,0.0	1.0,0.811,1.0	-0.778
ENSG00000150753	CCT5	5	+	10254877	10254950	10250471	10250557	10258222	10258415	0,0,1	14,18,11	2,2,2	0,2,0	125	79	0.0014128	0.0207035	0.0,0.0,0.054	1.0,0.387,1.0	-0.778
ENSG00000146433	TMEM181	6	+	159028275	159028375	159010703	159010814	159029364	159029495	0,0,0	2,9,12	4,1,7	0,1,0	172	86	0.0017008	0.024466	0.0,0.0,0.0	1.0,0.333,1.0	-0.778
ENSG00000243452	NBPF15	1	+	148558168	148558287	148556691	148556810	148560846	148561115	0,1,3	3,8,4	4,4,4	1,0,0	172	86	0.0023272	0.0321862	0.0,0.059,0.273	0.667,1.0,1.0	-0.778
ENSG00000214078	CPNE1	20	-	34220084	34220170	34219866	34219947	34220232	34220307	13,7,11	51,61,48	16,23,19	0,2,3	128	56	0	0	0.1,0.048,0.091	1.0,0.834,0.735	-0.777
ENSG00000077380	DYNC1I2	2	+	172582703	172582803	172582428	172582591	172583300	172583426	15,8,4	21,33,23	33,16,16	2,1,0	172	86	4.44089e-16	3.48794e-14	0.263,0.108,0.08	0.892,0.889,1.0	-0.777
ENSG00000174243	DDX23	12	-	49231306	49231440	49231063	49231176	49231724	49231863	2,4,3	17,23,24	21,24,16	0,3,3	172	86	9.99201e-16	7.6312e-14	0.056,0.08,0.059	1.0,0.8,0.727	-0.777
ENSG00000071189	SNX13	7	-	17874383	17874488	17873674	17873807	17879429	17879623	1,4,4	33,37,19	8,7,5	0,1,1	172	86	2.85012e-11	1.4255e-09	0.015,0.051,0.095	1.0,0.778,0.714	-0.777
ENSG00000178127	NDUFV2	18	+	9124871	9124994	9122510	9122679	9126828	9126905	18,21,13	50,41,52	6,14,7	0,0,1	156	70	5.00731e-10	2.19644e-08	0.139,0.187,0.101	1.0,1.0,0.759	-0.777
ENSG00000119596	YLPM1	14	+	75295915	75296046	75287759	75287840	75301967	75302150	5,7,8	18,22,19	10,6,10	0,1,0	160	74	2.0043e-08	7.2322e-07	0.114,0.128,0.163	1.0,0.735,1.0	-0.777
ENSG00000187778	MCRS1	12	-	49952996	49953084	49952625	49952753	49953511	49953604	9,6,3	34,32,22	2,6,3	0,0,1	162	86	1.05315e-05	0.00025039	0.123,0.091,0.068	1.0,1.0,0.614	-0.777
ENSG00000163930	BAP1	3	-	52437431	52437910	52437153	52437314	52438468	52438602	2,4,3	7,15,7	7,6,1	0,1,0	172	86	5.72028e-05	0.00117007	0.125,0.118,0.176	1.0,0.75,1.0	-0.777
ENSG00000124496	TRERF1	6	-	42330684	42330817	42268375	42268487	42418914	42418999	0,1,1	15,21,7	3,1,5	2,0,0	164	78	0.000206381	0.00373105	0.0,0.022,0.064	0.416,1.0,1.0	-0.777
ENSG00000066651	TRMT11	6	+	126317112	126317186	126314902	126314968	126319368	126319461	9,4,11	64,68,62	1,2,1	0,1,0	107	59	0.00021634	0.00388962	0.072,0.031,0.089	1.0,0.524,1.0	-0.777
ENSG00000100650	SRSF5	14	+	70235514	70237257	70235320	70235391	70237711	70237822	7,6,12	14,13,15	63,68,56	0,0,2	150	64	0	0	0.176,0.165,0.254	1.0,1.0,0.923	-0.776
ENSG00000135679	MDM2	12	+	69209407	69209500	69202987	69203072	69210591	69210725	4,13,13	129713051156	35,27,37	1,8,5	164	78	0	0	0.001,0.005,0.005	0.943,0.616,0.779	-0.776
ENSG00000164111	ANXA5	4	-	122599506	122599649	122599048	122599105	122602825	122602916	43,30,28	62,61,60	65,52,47	1,3,0	134	48	0	0	0.199,0.15,0.143	0.959,0.861,1.0	-0.776
ENSG00000071462	WBSCR22	7	+	73108321	73108380	73107953	73107999	73111934	73112024	17,8,16	37,38,37	15,14,15	1,0,0	54	36	6.66134e-16	5.14747e-14	0.234,0.123,0.224	0.909,1.0,1.0	-0.776
ENSG00000123505	AMD1	6	+	111208707	111208794	111195972	111196418	111213501	111213646	11,6,6	67,82,56	11,12,13	0,1,4	160	86	2.77556e-15	2.05424e-13	0.081,0.038,0.054	1.0,0.866,0.636	-0.776
ENSG00000180530	NRIP1	21	-	16386664	16386787	16333555	16340847	16437065	16437321	7,4,3	12,9,11	27,12,16	0,1,0	172	86	1.89757e-11	9.70521e-10	0.226,0.182,0.12	1.0,0.857,1.0	-0.776
ENSG00000115020	PIKFYVE	2	+	209153452	209153542	209138307	209138457	209163364	209163503	3,0,5	11,23,12	8,9,2	1,1,0	166	86	9.49593e-08	3.10963e-06	0.124,0.0,0.178	0.806,0.823,1.0	-0.776
ENSG00000181555	SETD2	3	-	47147486	47147610	47139444	47139571	47155365	47155494	4,4,5	36,34,37	10,4,4	0,0,2	172	86	2.57221e-07	7.92792e-06	0.053,0.056,0.063	1.0,1.0,0.5	-0.776
ENSG00000112249	ASCC3	6	-	101214440	101214581	101173414	101173579	101215020	101215221	16,14,9	32,32,44	6,1,8	0,0,1	172	86	1.30772e-06	3.61045e-05	0.2,0.179,0.093	1.0,1.0,0.8	-0.776
ENSG00000099917	MED15	22	+	20909222	20909435	20891403	20891491	20918736	20918753	0,2,0	6,4,2	10,6,4	1,0,0	91	5	0.000311718	0.00539831	0.0,0.027,0.0	0.355,1.0,1.0	-0.776
ENSG00000083312	TNPO1	5	+	72189442	72189530	72189203	72189362	72192284	72192383	21,20,22	72,97,113	24,20,16	0,1,3	162	86	0	0	0.134,0.099,0.094	1.0,0.914,0.739	-0.775
ENSG00000108443	RPS6KB1	17	+	58013575	58013638	58012553	58012661	58013824	58013902	1,0,0	50,36,52	3,6,4	2,1,0	97	71	6.76702e-11	3.26643e-09	0.014,0.0,0.0	0.523,0.815,1.0	-0.775
ENSG00000118816	CCNI	4	-	77977114	77977253	77976475	77976533	77987401	77987558	7,6,4	21,18,27	12,11,13	3,0,0	137	51	1.21711e-08	4.52264e-07	0.11,0.11,0.052	0.598,1.0,1.0	-0.775
ENSG00000111596	CNOT2	12	+	70724066	70724249	70671911	70672054	70729217	70729343	0,0,1	54,72,74	1,2,2	1,0,0	172	86	1.01837e-07	3.31612e-06	0.0,0.0,0.007	0.333,1.0,1.0	-0.775
ENSG00000064115	TM7SF3	12	-	27128428	27128591	27126127	27127160	27167010	27167327	3,4,2	15,22,5	4,4,2	1,0,0	172	86	6.34792e-05	0.00128725	0.091,0.083,0.167	0.667,1.0,1.0	-0.775
ENSG00000160953	MUM1	19	+	1364507	1364578	1362248	1362350	1366303	1366380	0,2,4	3,5,7	7,11,6	0,0,1	112	70	0.000104426	0.00201391	0.0,0.2,0.263	1.0,1.0,0.789	-0.775
ENSG00000173230	GOLGB1	3	-	121418658	121418732	121415846	121417776	121433707	121433823	7,7,4	23,31,22	4,2,1	1,0,0	134	86	0.00023095	0.00412489	0.163,0.127,0.104	0.72,1.0,1.0	-0.775
ENSG00000140650	PMM2	16	+	8898623	8898700	8895655	8895767	8905494	8905570	3,1,0	16,15,21	1,3,3	0,0,2	123	69	0.000238738	0.00425117	0.095,0.036,0.0	1.0,1.0,0.457	-0.775
ENSG00000137411	VARS2	6	+	30879460	30879544	30879207	30879276	30879790	30880235	7,0,2	14,9,6	3,5,4	0,0,1	130	62	0.000317148	0.0054812	0.193,0.0,0.137	1.0,1.0,0.656	-0.775
ENSG00000140521	POLG	15	-	89863996	89864243	89862458	89862581	89867045	89867132	1,0,2	8,12,8	2,4,2	0,0,1	166	80	0.000510549	0.0083694	0.057,0.0,0.108	1.0,1.0,0.491	-0.775
ENSG00000123739	PLA2G12A	4	-	110639838	110639915	110638703	110638869	110650757	110651233	0,3,1	8,5,11	3,3,4	1,0,0	140	86	0.000621762	0.0099809	0.0,0.269,0.053	0.648,1.0,1.0	-0.775
ENSG00000140987	ZNF434	16	-	3443648	3443814	3434083	3434941	3450944	3451013	1,0,3	4,4,3	2,7,12	0,0,2	148	62	0.00185831	0.0264024	0.095,0.0,0.295	1.0,1.0,0.715	-0.775
ENSG00000167962	ZNF598	16	-	2048965	2049122	2048702	2048853	2049496	2050257	9,7,7	64,82,87	29,26,25	7,2,1	172	86	0	0	0.066,0.041,0.039	0.674,0.867,0.926	-0.774
ENSG00000100968	NFATC4	14	+	24844865	24844921	24843531	24843672	24845180	24845307	0,0,2	23,35,34	10,11,13	2,4,2	98	86	0	0	0.0,0.0,0.049	0.814,0.707,0.851	-0.774
ENSG00000137955	RABGGTB	1	+	76256130	76256202	76254843	76255041	76256969	76257022	2,0,1	7,9,19	5,8,8	0,2,1	90	46	1.11891e-07	3.61982e-06	0.127,0.0,0.026	1.0,0.672,0.803	-0.774
ENSG00000130592	LSP1	11	+	1905509	1905553	1905161	1905254	1905729	1905811	1,2,3	17,16,13	5,6,5	1,1,0	63	75	1.74361e-07	5.49794e-06	0.065,0.13,0.216	0.856,0.877,1.0	-0.774
ENSG00000119844	AFTPH	2	+	64796756	64796813	64796225	64796352	64800079	64800202	4,3,4	18,21,23	3,4,5	1,0,0	100	86	3.10936e-06	8.08433e-05	0.16,0.109,0.13	0.721,1.0,1.0	-0.774
ENSG00000115170	ACVR1	2	-	158617391	158617589	158594951	158595082	158622432	158622708	5,3,6	32,26,25	5,3,6	2,0,0	172	86	4.11239e-06	0.00010499	0.072,0.055,0.107	0.556,1.0,1.0	-0.774
ENSG00000186812	ZNF397	18	+	32825225	32825315	32823115	32823257	32837891	32838394	0,2,1	8,4,3	7,6,4	0,0,1	166	86	0.000210153	0.00379372	0.0,0.206,0.147	1.0,1.0,0.675	-0.774
ENSG00000189376	C8orf76	8	-	124251288	124251384	124250037	124250181	124253469	124253638	1,0,2	6,2,4	7,11,3	0,0,1	172	86	0.000822989	0.0128017	0.077,0.0,0.2	1.0,1.0,0.6	-0.774
ENSG00000135597	REPS1	6	-	139268926	139269050	139242173	139242261	139308666	139309398	1,3,0	6,6,10	3,2,2	1,0,0	167	81	0.00237347	0.0327425	0.075,0.195,0.0	0.593,1.0,1.0	-0.774
ENSG00000240344	PPIL3	2	-	201747064	201747158	201746143	201746211	201750420	201750495	0,1,2	5,6,2	2,5,5	0,1,0	129	43	0.00242937	0.0334247	0.0,0.053,0.25	1.0,0.625,1.0	-0.774
ENSG00000156639	ZFAND3	6	+	37897734	37897775	37787274	37787792	38029368	38029551	7,8,8	145,138,90	15,28,24	4,7,4	68	86	0	0	0.058,0.068,0.101	0.826,0.835,0.884	-0.773
ENSG00000115310	RTN4	2	-	55200956	55201003	55200648	55200757	55201830	55201900	14,12,9	68,60,70	44,55,52	5,3,3	57	63	0	0	0.185,0.181,0.124	0.907,0.953,0.95	-0.773
ENSG00000145817	YIPF5	5	-	143549409	143549529	143544995	143545168	143550098	143550216	21,18,18	397420400	16,13,13	0,6,1	172	86	0	0	0.026,0.021,0.022	1.0,0.52,0.867	-0.773
ENSG00000144895	EIF2A	3	+	150293435	150293549	150289744	150290316	150299404	150299533	18,14,15	39,38,45	26,31,21	2,1,0	172	86	0	0	0.188,0.156,0.143	0.867,0.939,1.0	-0.773
ENSG00000148229	POLE3	9	-	116172334	116172420	116171889	116172008	116172507	116172688	14,18,29	113,107,70	17,7,11	0,1,1	158	86	1.11022e-16	9.06291e-15	0.063,0.084,0.184	1.0,0.792,0.857	-0.773
ENSG00000129353	SLC44A2	19	+	10742719	10742832	10742543	10742627	10745431	10745563	9,5,7	15,20,16	21,19,20	0,2,0	163	77	2.9865e-13	1.85336e-11	0.221,0.106,0.171	1.0,0.818,1.0	-0.773
ENSG00000153066	TXNDC11	16	-	11815432	11815526	11791980	11792181	11829872	11830089	20,21,21	49,67,49	8,20,9	1,0,0	172	86	3.61045e-13	2.21298e-11	0.169,0.135,0.176	0.8,1.0,1.0	-0.773
ENSG00000004897	CDC27	17	-	45219218	45219391	45216104	45216257	45219594	45219802	1,2,5	42,48,34	6,6,9	2,0,1	172	86	5.73941e-12	3.10512e-10	0.012,0.02,0.068	0.6,1.0,0.818	-0.773
ENSG00000112531	QKI	6	+	163987752	163987827	163984475	163984751	163991725	163991773	6,3,4	7,8,10	19,13,23	1,0,0	91	41	7.38847e-10	3.18261e-08	0.279,0.145,0.153	0.895,1.0,1.0	-0.773
ENSG00000165271	NOL6	9	-	33466068	33466223	33465731	33465895	33466305	33466423	10,6,13	25,43,22	10,5,7	0,0,1	172	86	2.0026e-08	7.22819e-07	0.167,0.065,0.228	1.0,1.0,0.778	-0.773
ENSG00000127603	MACF1	1	+	39893126	39893286	39889699	39889866	39893632	39893959	6,2,12	15,15,18	14,8,8	0,0,1	172	86	2.76492e-08	9.78951e-07	0.167,0.063,0.25	1.0,1.0,0.8	-0.773
ENSG00000182831	C16orf72	16	+	9186777	9186858	9185474	9186127	9196840	9197116	13,7,9	34,39,30	5,5,4	0,1,0	148	86	8.84016e-07	2.5206e-05	0.182,0.094,0.148	1.0,0.744,1.0	-0.773
ENSG00000144231	POLR2D	2	-	128608163	128608259	128603895	128605759	128615339	128615523	1,10,3	13,9,9	7,12,6	0,1,0	172	86	4.7029e-06	0.000118898	0.037,0.357,0.143	1.0,0.857,1.0	-0.773
ENSG00000100629	CEP128	14	-	81307025	81307112	81259103	81259454	81329100	81329217	13,5,3	25,19,14	6,3,2	1,0,0	160	86	9.25408e-05	0.00180908	0.218,0.124,0.103	0.763,1.0,1.0	-0.773
ENSG00000138613	APH1B	15	+	63579622	63579745	63578756	63578827	63594543	63594671	0,4,0	8,7,8	5,5,4	0,2,0	150	64	0.000400512	0.00674681	0.0,0.196,0.0	1.0,0.516,1.0	-0.773
ENSG00000118007	STAG1	3	-	136219064	136219138	136196130	136196254	136221469	136221621	3,5,1	19,9,13	1,4,2	0,1,0	134	86	0.000854883	0.0132482	0.092,0.263,0.047	1.0,0.72,1.0	-0.773
ENSG00000164329	PAPD4	5	+	78938654	78938733	78908833	78908898	78940945	78941015	1,3,5	5,12,13	4,2,1	1,0,0	93	35	0.00233223	0.0322415	0.07,0.086,0.126	0.601,1.0,1.0	-0.773
ENSG00000180104	EXOC3	5	+	445040	445179	443382	443405	446264	446464	0,0,0	4,4,3	3,6,7	1,0,0	102	16	0.00285235	0.0385123	0.0,0.0,0.0	0.32,1.0,1.0	-0.773
ENSG00000214753	HNRNPUL2	11	-	62491385	62491462	62491058	62491198	62491762	62491898	11,9,11	32,40,24	22,23,29	1,0,2	140	86	0	0	0.174,0.121,0.22	0.931,1.0,0.899	-0.772
ENSG00000075413	MARK3	14	+	103932308	103932428	103931893	103932130	103932679	103932779	7,12,8	406391397	10,10,7	0,2,2	172	86	0	0	0.009,0.015,0.01	1.0,0.714,0.636	-0.772
ENSG00000111581	NUP107	12	+	69121130	69121169	69120278	69120397	69124889	69125040	25,28,26	162149163	60,56,48	2,4,4	64	86	0	0	0.172,0.202,0.177	0.976,0.95,0.942	-0.772
ENSG00000244306	CTD-2314B22.3	14	-	19894699	19894790	19854097	19857070	19925239	19925345	25,17,22	87,73,64	26,17,31	0,2,2	168	86	0	0	0.128,0.107,0.15	1.0,0.813,0.888	-0.772
ENSG00000137575	SDCBP	8	+	59493075	59493167	59492181	59492353	59494244	59494615	18,18,20	53,52,31	7,13,12	0,0,1	170	86	7.77745e-12	4.15358e-10	0.147,0.149,0.246	1.0,1.0,0.859	-0.772
ENSG00000214046	C19orf42	19	-	16764845	16764936	16757817	16758072	16770895	16770925	68,54,51	81,80,78	12,10,10	1,0,0	105	23	2.07178e-08	7.45842e-07	0.155,0.129,0.125	0.724,1.0,1.0	-0.772
ENSG00000108559	NUP88	17	-	5298210	5298301	5294880	5294982	5302871	5302970	1,0,0	5,13,12	6,9,8	2,0,1	168	86	7.82819e-08	2.6001e-06	0.093,0.0,0.0	0.606,1.0,0.804	-0.772
ENSG00000176142	TMEM39A	3	-	119171293	119171377	119165864	119166019	119180808	119180995	6,7,12	30,32,25	5,7,6	1,0,0	154	86	1.45642e-07	4.63109e-06	0.1,0.109,0.211	0.736,1.0,1.0	-0.772
ENSG00000165055	METTL2B	7	+	128140956	128141022	128138089	128138196	128141815	128141886	0,1,1	3,10,7	14,8,6	2,1,1	96	64	2.06883e-07	6.45638e-06	0.0,0.063,0.087	0.824,0.842,0.8	-0.772
ENSG00000171914	TLN2	15	+	63040549	63040643	63032828	63032968	63042600	63042690	0,1,0	16,18,16	3,6,1	1,1,0	169	83	5.48001e-07	1.61811e-05	0.0,0.027,0.0	0.596,0.747,1.0	-0.772
ENSG00000102738	MRPS31	13	-	41328154	41328228	41323273	41323417	41331008	41331149	3,0,2	5,2,3	10,17,13	0,0,1	134	86	4.64499e-05	0.000968585	0.278,0.0,0.3	1.0,1.0,0.893	-0.772
ENSG00000136231	IGF2BP3	7	-	23381682	23381808	23358756	23358873	23385558	23385681	1,1,1	76,83,62	13,19,16	3,3,1	172	86	0	0	0.007,0.006,0.008	0.684,0.76,0.889	-0.771
ENSG00000106605	BLVRA	7	+	43810736	43810769	43798278	43798333	43827502	43827624	2,3,7	65,48,51	10,14,17	4,1,4	26	48	0	0	0.054,0.103,0.202	0.822,0.963,0.887	-0.771
ENSG00000087365	SF3B2	11	+	65823005	65823056	65822546	65822786	65824308	65824426	30,22,18	89,96,74	20,15,21	0,1,0	88	86	0	0	0.248,0.183,0.192	1.0,0.936,1.0	-0.771
ENSG00000103550	C16orf88	16	-	19722693	19722762	19721830	19721908	19725439	19726359	4,7,7	29,46,41	173177147	18,18,16	109	71	0	0	0.082,0.09,0.1	0.862,0.865,0.857	-0.771
ENSG00000110066	SUV420H1	11	-	67947598	67947667	67942484	67942650	67953247	67953395	0,0,1	256241220	8,4,4	0,1,2	124	86	0	0	0.0,0.0,0.003	1.0,0.735,0.581	-0.771
ENSG00000168495	POLR3D	8	+	22105666	22105791	22105369	22105521	22105993	22106162	4,3,7	14,20,21	26,27,20	0,3,2	172	86	2.22045e-16	1.78565e-14	0.125,0.07,0.143	1.0,0.818,0.833	-0.771
ENSG00000153814	JAZF1	7	-	27934838	27935035	27880387	27880486	28031527	28031600	17,15,13	29,26,25	26,21,14	0,1,0	152	66	4.44089e-16	3.48794e-14	0.203,0.2,0.184	1.0,0.901,1.0	-0.771
ENSG00000143621	ILF2	1	-	153635690	153635752	153635494	153635609	153636871	153636950	3,11,16	33,28,27	10,22,28	0,0,2	96	72	9.99201e-16	7.6312e-14	0.064,0.228,0.308	1.0,1.0,0.913	-0.771
ENSG00000105993	DNAJB6	7	+	157202488	157202695	157160066	157160177	157208709	157210133	0,8,3	19,27,20	22,20,23	0,3,4	172	86	4.88498e-15	3.53971e-13	0.0,0.129,0.07	1.0,0.769,0.742	-0.771
ENSG00000115825	PRKD3	2	-	37486725	37486824	37483804	37484072	37487365	37487527	17,9,6	56,43,36	9,8,7	1,1,0	172	86	1.86087e-11	9.5214e-10	0.132,0.095,0.077	0.818,0.8,1.0	-0.771
ENSG00000125459	MSTO1	1	+	155582208	155582361	155581972	155582107	155582634	155582766	3,4,6	30,27,26	8,11,4	1,2,0	172	86	2.79576e-10	1.2651e-08	0.048,0.069,0.103	0.8,0.733,1.0	-0.771
ENSG00000118816	CCNI	4	-	77977114	77977255	77976302	77976533	77987401	77987558	7,6,4	21,18,27	12,11,14	3,0,0	172	86	1.44006e-09	5.98166e-08	0.143,0.143,0.069	0.667,1.0,1.0	-0.771
ENSG00000013375	PGM3	6	-	83900527	83900733	83884092	83884206	83902897	83903012	10,6,7	60,58,55	12,6,8	0,3,0	172	86	6.6868e-09	2.56052e-07	0.077,0.049,0.06	1.0,0.5,1.0	-0.771
ENSG00000111145	ELK3	12	+	96617342	96617551	96588322	96588483	96640717	96640989	19,19,19	55,41,36	4,12,5	0,1,0	172	86	1.88495e-08	6.82531e-07	0.147,0.188,0.209	1.0,0.857,1.0	-0.771
ENSG00000100592	DAAM1	14	+	59827519	59827580	59826114	59826222	59830368	59830500	1,2,1	10,14,9	8,3,4	1,1,0	108	86	3.83784e-06	9.85489e-05	0.074,0.102,0.081	0.864,0.705,1.0	-0.771
ENSG00000075856	SART3	12	-	108925997	108926110	108924980	108925057	108930289	108930348	1,2,0	17,14,13	4,6,4	0,0,2	122	36	3.07992e-05	0.000666805	0.017,0.04,0.0	1.0,1.0,0.371	-0.771
ENSG00000128694	OSGEPL1	2	-	190617378	190617450	190615303	190615382	190617574	190617705	2,0,1	4,4,8	12,8,6	0,3,0	116	72	0.000134972	0.00254465	0.237,0.0,0.072	1.0,0.623,1.0	-0.771
ENSG00000110218	PANX1	11	+	93886656	93886796	93862094	93862659	93912767	93913423	3,2,4	9,12,9	5,1,3	1,0,0	172	86	0.000697117	0.0110382	0.143,0.077,0.182	0.714,1.0,1.0	-0.771
ENSG00000101596	SMCHD1	18	+	2674013	2674144	2666868	2667030	2688391	2688506	0,0,1	11,9,23	2,1,2	2,0,0	172	86	0.00351252	0.0461666	0.0,0.0,0.021	0.333,1.0,1.0	-0.771
ENSG00000115904	SOS1	2	-	39216410	39216455	39214613	39214732	39222263	39222528	1,0,3	15,12,16	53,38,49	6,7,15	76	86	0	0	0.07,0.0,0.175	0.909,0.86,0.787	-0.77
ENSG00000150938	CRIM1	2	+	36740698	36740908	36739415	36739537	36744469	36744685	354357306	786798648	900670724	18,19,15	172	86	0	0	0.184,0.183,0.191	0.962,0.946,0.96	-0.77
ENSG00000115233	PSMD14	2	+	162175332	162175384	162172947	162173080	162223988	162224060	5,21,5	267259251	12,10,13	3,4,1	69	65	0	0	0.017,0.071,0.018	0.79,0.702,0.925	-0.77
ENSG00000140285	FGF7	15	+	49716637	49716780	49715456	49715637	49775347	49775451	4,11,5	71,65,58	11,5,6	0,3,0	172	86	1.99688e-08	7.2096e-07	0.027,0.078,0.041	1.0,0.455,1.0	-0.77
ENSG00000021645	NRXN3	14	+	80271454	80271542	80163972	80164280	80327381	80328797	4,0,2	9,9,6	10,8,16	1,0,2	162	86	2.2814e-07	7.07895e-06	0.191,0.0,0.15	0.841,1.0,0.809	-0.77
ENSG00000155099	TMEM55A	8	-	92020970	92021023	92008881	92008972	92030617	92030741	0,2,0	30,26,13	4,2,5	3,0,1	90	84	1.07263e-06	3.00674e-05	0.0,0.067,0.0	0.554,1.0,0.824	-0.77
ENSG00000168256	NKIRAS2	17	+	40173562	40173689	40172114	40172222	40174416	40174658	1,1,0	5,6,3	5,12,13	1,0,2	172	86	1.43524e-05	0.000332906	0.091,0.077,0.0	0.714,1.0,0.765	-0.77
ENSG00000065613	SLK	10	+	105778541	105778666	105777917	105778047	105779491	105779680	1,0,0	21,18,23	5,7,1	0,0,1	172	86	2.96231e-05	0.000643244	0.023,0.0,0.0	1.0,1.0,0.333	-0.77
ENSG00000162714	ZNF496	1	-	247473625	247473758	247473000	247473108	247486455	247486532	1,3,2	7,10,5	7,5,4	0,0,1	156	70	0.000104738	0.00201898	0.06,0.119,0.152	1.0,1.0,0.642	-0.77
ENSG00000100722	ZC3H14	14	+	89063077	89063152	89044328	89044484	89073586	89073707	1,1,0	5,10,4	6,7,2	1,2,0	136	86	0.000135013	0.00254504	0.112,0.059,0.0	0.791,0.689,1.0	-0.77
ENSG00000104517	UBR5	8	-	103311679	103311724	103311094	103311199	103312227	103312379	2,5,0	20,10,11	5,2,3	0,0,1	76	86	0.000196324	0.00356788	0.102,0.361,0.0	1.0,1.0,0.772	-0.77
ENSG00000135372	NAT10	11	+	34139726	34139841	34137369	34137431	34139942	34140050	2,1,2	7,3,3	3,2,7	0,0,1	141	55	0.00285641	0.0385533	0.1,0.115,0.206	1.0,1.0,0.732	-0.77
ENSG00000169554	ZEB2	2	-	145274844	145274986	145185613	145187593	145277505	145277686	2,4,3	143161160	4,5,12	1,0,3	172	86	0	0	0.007,0.012,0.009	0.667,1.0,0.667	-0.769
ENSG00000136238	RAC1	7	+	6438292	6438349	6431554	6431672	6439756	6439819	32,44,36	174204156	103105103	10,8,6	70	56	0	0	0.128,0.147,0.156	0.892,0.913,0.932	-0.769
ENSG00000106638	TBL2	7	-	72985518	72985671	72984740	72985302	72987649	72987801	8,12,8	80,68,68	5,4,7	1,0,1	172	86	6.56164e-11	3.17098e-09	0.048,0.081,0.056	0.714,1.0,0.778	-0.769
ENSG00000071054	MAP4K4	2	+	102475457	102475544	102460562	102460773	102476197	102478702	6,3,6	14,15,9	10,22,10	0,2,0	160	86	1.19213e-09	5.01033e-08	0.187,0.097,0.264	1.0,0.855,1.0	-0.769
ENSG00000166128	RAB8B	15	+	63536954	63537015	63481792	63481947	63541843	63541904	1,4,5	7,13,14	4,4,5	0,0,1	76	54	5.23399e-05	0.00108019	0.092,0.179,0.202	1.0,1.0,0.78	-0.769
ENSG00000114423	CBLB	3	-	105438890	105439094	105422831	105423017	105452852	105452984	6,4,1	28,27,18	2,1,3	1,0,0	172	86	0.000313515	0.0054267	0.097,0.069,0.027	0.5,1.0,1.0	-0.769
ENSG00000180530	NRIP1	21	-	16415815	16415895	16333555	16340847	16437065	16437126	3,2,2	12,9,11	3,3,2	0,1,0	114	54	0.000798868	0.012466	0.106,0.095,0.079	1.0,0.587,1.0	-0.769
ENSG00000213949	ITGA1	5	+	52216161	52216298	52214561	52214728	52218606	52218717	15,16,14	102130102	33,12,16	1,2,2	172	86	0	0	0.068,0.058,0.064	0.943,0.75,0.8	-0.768
ENSG00000227345	PARG	10	-	51077521	51077601	51069633	51069709	51087718	51087876	22,18,19	30,36,46	86,89,65	0,1,0	129	69	0	0	0.282,0.211,0.181	1.0,0.979,1.0	-0.768
ENSG00000144895	EIF2A	3	+	150280343	150280447	150276174	150276249	150281301	150281401	5,3,3	59,46,52	13,10,12	1,1,2	154	68	0	0	0.036,0.028,0.025	0.852,0.815,0.726	-0.768
ENSG00000078668	VDAC3	8	+	42252601	42252651	42251727	42251796	42256229	42256382	7,4,4	406453451	15,15,12	5,4,3	62	62	0	0	0.017,0.009,0.009	0.75,0.789,0.8	-0.768
ENSG00000115525	ST3GAL5	2	-	86088303	86088415	86075273	86075327	86090484	86090608	8,3,5	73,56,55	7,10,12	1,0,2	133	47	4.44089e-16	3.48794e-14	0.037,0.019,0.031	0.712,1.0,0.68	-0.768
ENSG00000150712	MTMR12	5	-	32233878	32234040	32227111	32230453	32239106	32239279	29,17,21	84,94,69	14,5,4	0,0,1	172	86	4.59163e-09	1.79467e-07	0.147,0.083,0.132	1.0,1.0,0.667	-0.768
ENSG00000136280	CCM2	7	+	45108041	45108178	45104061	45104245	45113058	45113170	2,0,1	13,23,11	4,6,5	1,1,0	172	86	4.78033e-08	1.63712e-06	0.071,0.0,0.043	0.667,0.75,1.0	-0.768
ENSG00000101391	CDK5RAP1	20	-	31961920	31962018	31954664	31954814	31967266	31967497	0,1,1	21,9,20	4,5,3	1,1,0	172	86	1.07651e-07	3.48809e-06	0.0,0.053,0.024	0.667,0.714,1.0	-0.768
ENSG00000213614	HEXA	15	-	72648865	72648958	72647899	72647965	72668060	72668344	9,7,3	18,13,8	5,9,9	0,0,1	145	59	1.55721e-06	4.24933e-05	0.169,0.18,0.132	1.0,1.0,0.786	-0.768
ENSG00000102471	NDFIP2	13	+	80122462	80122529	80113816	80113910	80125151	80125257	3,5,1	72,48,49	1,2,6	1,0,0	120	86	1.69032e-06	4.58542e-05	0.029,0.069,0.014	0.417,1.0,1.0	-0.768
ENSG00000073792	IGF2BP2	3	-	185540940	185541001	185407142	185407415	185542570	185542844	6,4,6	20,13,26	4,7,3	0,1,0	108	86	1.88117e-06	5.07254e-05	0.193,0.197,0.155	1.0,0.848,1.0	-0.768
ENSG00000140694	PARN	16	-	14721125	14721193	14720962	14721044	14722028	14722108	1,2,0	6,7,4	12,3,5	2,0,1	98	62	8.42212e-05	0.00166289	0.095,0.153,0.0	0.791,1.0,0.76	-0.768
ENSG00000141027	NCOR1	17	-	16068292	16068475	16062073	16062187	16089867	16090001	3,2,1	9,7,3	5,3,5	1,0,0	172	86	0.000477008	0.00787556	0.143,0.125,0.143	0.714,1.0,1.0	-0.768
ENSG00000167202	TBC1D2B	15	-	78346375	78346529	78337241	78337410	78369634	78369994	0,1,0	16,17,20	2,1,1	0,0,1	172	86	0.000708391	0.0112016	0.0,0.029,0.0	1.0,1.0,0.333	-0.768
ENSG00000198668	CALM1	14	+	90866408	90866439	90863375	90863577	90867602	90867746	12,10,14	190212181	13,16,10	4,7,1	48	86	0	0	0.102,0.078,0.122	0.853,0.804,0.947	-0.767
ENSG00000132424	PNISR	6	-	99851704	99851758	99850415	99850586	99852478	99852578	3,3,5	27,23,38	43,40,29	6,2,7	94	86	0	0	0.092,0.107,0.107	0.868,0.948,0.791	-0.767
ENSG00000141543	EIF4A3	17	-	78115117	78115180	78113806	78113939	78115580	78115647	27,27,23	74,82,78	13,21,18	0,0,2	86	60	0	0	0.203,0.187,0.171	1.0,1.0,0.863	-0.767
ENSG00000258529	RP11-108O10.8	11	-	111735903	111735974	111731269	111731358	111739324	111739459	2,5,0	30,22,24	13,10,13	1,2,2	124	82	6.66134e-16	5.14747e-14	0.042,0.131,0.0	0.896,0.768,0.811	-0.767
ENSG00000167699	GLOD4	17	-	673660	673747	673283	673397	674564	674701	5,4,4	14,19,13	14,11,9	0,0,2	160	86	6.98764e-09	2.66915e-07	0.161,0.102,0.142	1.0,1.0,0.707	-0.767
ENSG00000175376	EIF1AD	11	-	65767773	65767877	65767037	65767146	65769380	65769607	7,4,0	15,12,10	11,16,10	0,2,1	172	86	8.24482e-09	3.12445e-07	0.189,0.143,0.0	1.0,0.8,0.833	-0.767
ENSG00000144354	CDCA7	2	+	174231010	174231160	174230179	174230320	174231877	174232014	8,2,3	18,16,15	8,10,7	1,1,0	172	86	1.07443e-08	4.01782e-07	0.182,0.059,0.091	0.8,0.833,1.0	-0.767
ENSG00000120519	SLC10A7	4	-	147177977	147178088	147177642	147177672	147179843	147179989	1,4,4	2,3,2	78,50,56	0,1,0	109	23	5.16407e-07	1.52918e-05	0.095,0.22,0.297	1.0,0.913,1.0	-0.767
ENSG00000164818	HEATR2	7	+	813684	813835	810107	810255	819589	819781	2,4,3	11,6,9	7,9,7	0,0,1	172	86	3.39109e-06	8.78016e-05	0.083,0.25,0.143	1.0,1.0,0.778	-0.767
ENSG00000139146	FAM60A	12	-	31440567	31440718	31435231	31435805	31446738	31446865	13,7,1	26,16,14	10,3,5	0,0,1	172	86	7.20723e-06	0.000176374	0.2,0.179,0.034	1.0,1.0,0.714	-0.767
ENSG00000168283	BMI1	10	+	22616523	22616576	22615818	22615915	22616878	22616892	13,6,6	22,27,14	4,6,2	0,1,0	46	7	0.00010935	0.002103	0.083,0.033,0.061	1.0,0.477,1.0	-0.767
ENSG00000120370	GORAB	1	+	170508350	170508708	170501269	170501425	170511631	170511733	3,2,0	19,7,12	2,2,2	0,1,0	172	86	0.000817812	0.0127323	0.073,0.125,0.0	1.0,0.5,1.0	-0.767
ENSG00000050130	JKAMP	14	+	59953448	59953522	59951220	59951311	59954391	59954546	26,32,26	180183181	66,71,54	6,10,5	132	84	0	0	0.084,0.1,0.084	0.875,0.819,0.873	-0.766
ENSG00000100991	TRPC4AP	20	-	33632307	33632515	33622925	33623111	33637668	33637797	5,1,4	56,63,47	13,21,26	3,2,2	172	86	0	0	0.043,0.008,0.041	0.684,0.84,0.867	-0.766
ENSG00000143543	JTB	1	-	153949451	153949489	153948292	153948381	153949645	153949865	3,1,5	33,33,25	9,11,14	1,3,2	58	82	9.99201e-15	7.07557e-13	0.114,0.041,0.22	0.927,0.838,0.908	-0.766
ENSG00000135829	DHX9	1	+	182812428	182812569	182808503	182808591	182821367	182821479	14,10,17	37,56,31	18,7,6	3,0,0	167	81	2.09344e-09	8.51663e-08	0.155,0.08,0.21	0.744,1.0,1.0	-0.766
ENSG00000123505	AMD1	6	+	111213363	111213406	111195972	111196418	111213501	111213646	2,2,2	67,82,56	2,5,4	0,1,4	72	86	9.75787e-09	3.66437e-07	0.034,0.028,0.041	1.0,0.857,0.544	-0.766
ENSG00000137054	POLR1E	9	+	37500836	37500918	37498087	37498221	37501709	37501841	2,3,1	29,20,33	13,2,4	0,0,3	150	86	2.07236e-06	5.53732e-05	0.038,0.079,0.017	1.0,1.0,0.433	-0.766
ENSG00000068654	POLR1A	2	-	86315907	86315993	86315688	86315792	86316944	86317052	2,1,3	7,7,3	8,11,10	0,1,0	158	86	8.82683e-06	0.00021287	0.135,0.072,0.352	1.0,0.857,1.0	-0.766
ENSG00000119689	DLST	14	+	75361014	75361112	75360050	75360127	75365071	75365202	4,2,3	21,13,21	9,3,8	4,0,0	156	70	1.16905e-05	0.000275629	0.079,0.065,0.06	0.502,1.0,1.0	-0.766
ENSG00000138698	RAP1GDS1	4	+	99337895	99338039	99325627	99325753	99338517	99338649	3,5,1	15,18,18	6,4,7	0,0,3	172	86	1.46925e-05	0.000339906	0.091,0.122,0.027	1.0,1.0,0.538	-0.766
ENSG00000183735	TBK1	12	+	64853968	64854109	64849619	64849737	64858113	64858243	5,2,5	13,8,7	4,3,10	0,0,1	172	86	4.5859e-05	0.000957546	0.161,0.111,0.263	1.0,1.0,0.833	-0.766
ENSG00000010810	FYN	6	-	112167791	112167832	112041007	112041265	112194170	112194655	1,2,1	19,23,24	3,1,2	1,0,1	68	86	6.59058e-05	0.00133168	0.062,0.099,0.05	0.791,1.0,0.717	-0.766
ENSG00000048740	CELF2	10	+	11259387	11259470	11207448	11207645	11299700	11299835	3,3,5	15,18,17	2,2,3	0,0,1	152	86	0.000502443	0.00824955	0.102,0.086,0.143	1.0,1.0,0.629	-0.766
ENSG00000022840	RNF10	12	+	121008993	121009094	121003286	121003332	121013433	121013491	3,1,1	4,2,3	7,17,13	0,0,1	90	4	0.000926115	0.0142615	0.032,0.022,0.015	1.0,1.0,0.366	-0.766
ENSG00000164828	SUN1	7	+	908985	909153	905588	905704	912106	912199	14,12,15	31,29,31	16,17,22	0,0,2	172	86	4.66294e-15	3.38472e-13	0.184,0.171,0.195	1.0,1.0,0.846	-0.765
ENSG00000177963	RIC8A	11	+	212415	212511	211198	211349	212614	212724	3,3,2	15,10,18	19,18,13	1,1,2	172	86	7.77156e-14	5.09461e-12	0.091,0.13,0.053	0.905,0.9,0.765	-0.765
ENSG00000138430	OLA1	2	-	174987907	174988005	174939737	174940255	175006552	175006728	17,17,14	115108119	10,7,5	0,1,1	172	86	9.59233e-14	6.22267e-12	0.069,0.073,0.056	1.0,0.778,0.714	-0.765
ENSG00000144354	CDCA7	2	+	174231877	174232014	174231010	174231160	174232361	174233725	1,0,1	17,19,14	9,12,7	2,3,0	172	86	2.4295e-10	1.10826e-08	0.029,0.0,0.034	0.692,0.667,1.0	-0.765
ENSG00000101844	ATG4A	X	+	107372010	107372082	107369306	107369417	107374489	107374588	0,0,0	15,16,15	4,2,4	0,1,1	130	86	2.42076e-06	6.40332e-05	0.0,0.0,0.0	1.0,0.57,0.726	-0.765
ENSG00000144524	COPS7B	2	+	232663568	232663674	232660815	232661018	232672196	232672525	1,4,9	7,17,9	10,7,8	0,0,1	172	86	3.84769e-06	9.87815e-05	0.067,0.105,0.333	1.0,1.0,0.8	-0.765
ENSG00000005007	UPF1	19	+	18968128	18968342	18967685	18967829	18971129	18971247	3,4,6	11,11,10	6,6,8	0,0,1	172	86	5.37574e-06	0.000134651	0.12,0.154,0.231	1.0,1.0,0.8	-0.765
ENSG00000078674	PCM1	8	+	17782221	17782289	17780507	17780697	17794642	17794888	2,0,1	17,9,16	3,2,2	0,2,0	122	86	0.000748061	0.0117567	0.077,0.0,0.042	1.0,0.413,1.0	-0.765
ENSG00000181090	EHMT1	9	+	140705912	140706067	140695331	140695436	140707457	140707625	3,1,2	13,6,7	3,2,2	1,0,0	172	86	0.00260099	0.0355347	0.103,0.077,0.125	0.6,1.0,1.0	-0.765
ENSG00000139620	KANSL2	12	-	49075353	49075424	49073437	49073616	49075969	49076021	113,90,82	202258189	123121124	4,4,2	87	45	0	0	0.224,0.153,0.183	0.941,0.94,0.97	-0.764
ENSG00000100650	SRSF5	14	+	70235898	70237257	70235320	70235391	70237711	70237822	7,8,9	14,13,15	42,44,34	0,0,2	150	64	0	0	0.176,0.208,0.204	1.0,1.0,0.879	-0.764
ENSG00000156261	CCT8	21	-	30442567	30442658	30439876	30440026	30445851	30445886	67,84,60	77,60,72	40,41,39	1,0,0	110	28	0	0	0.181,0.263,0.175	0.911,1.0,1.0	-0.764
ENSG00000130402	ACTN4	19	+	39218955	39219021	39217596	39217743	39219635	39219794	12,20,15	64,78,71	38,32,41	5,3,1	118	86	0	0	0.12,0.157,0.133	0.847,0.886,0.968	-0.764
ENSG00000080845	DLGAP4	20	+	35128005	35128079	35125397	35125469	35128601	35128930	2,4,1	29,38,43	2,4,11	1,0,1	113	65	3.18021e-09	1.26566e-07	0.038,0.057,0.013	0.535,1.0,0.864	-0.764
ENSG00000109445	ZNF330	4	+	142143519	142143631	142142053	142142262	142147920	142148000	2,2,0	90,75,84	2,2,2	0,2,0	159	73	2.33238e-07	7.2317e-06	0.01,0.012,0.0	1.0,0.315,1.0	-0.764
ENSG00000108175	ZMIZ1	10	+	81058806	81058948	81058162	81058337	81060488	81060699	0,3,2	4,6,12	9,12,9	1,2,0	172	86	1.89221e-06	5.10086e-05	0.0,0.2,0.077	0.818,0.75,1.0	-0.764
ENSG00000070770	CSNK2A2	16	-	58208354	58208414	58202513	58202597	58230636	58230748	10,8,6	61,53,43	4,2,6	2,0,0	97	77	2.05984e-06	5.50505e-05	0.115,0.107,0.1	0.614,1.0,1.0	-0.764
ENSG00000196352	CD55	1	+	207512741	207512762	207510037	207510754	207532890	207534311	1,2,1	34,31,38	2,2,1	0,1,1	28	86	9.38944e-05	0.0018338	0.083,0.165,0.075	1.0,0.86,0.754	-0.764
ENSG00000089289	IGBP1	X	+	69368610	69368690	69353572	69353985	69370059	69370172	2,10,2	12,15,9	6,4,1	1,0,0	146	86	0.000465747	0.00771317	0.089,0.282,0.116	0.779,1.0,1.0	-0.764
ENSG00000135446	CDK4	12	-	58145282	58145519	58143236	58143287	58145957	58146116	57,57,50	609636643	67,68,77	7,5,7	130	44	0	0	0.031,0.029,0.026	0.764,0.822,0.788	-0.763
ENSG00000106144	CASP2	7	+	142997472	142997533	142997296	142997387	143000876	143001026	1,1,1	32,21,25	21,15,14	3,3,4	106	84	0	0	0.024,0.036,0.031	0.847,0.798,0.735	-0.763
ENSG00000051108	HERPUD1	16	+	56969315	56969387	56969146	56969224	56970598	56970729	5,3,2	23,38,21	10,10,3	0,1,1	115	71	3.12901e-10	1.4047e-08	0.118,0.046,0.056	1.0,0.861,0.649	-0.763
ENSG00000197020	ZNF100	19	-	21926818	21926917	21905567	21910791	21927742	21927869	1,0,0	19,14,23	5,2,6	1,0,2	172	86	4.93069e-08	1.68676e-06	0.026,0.0,0.0	0.714,1.0,0.6	-0.763
ENSG00000067369	TP53BP1	15	-	43724391	43724875	43720213	43720366	43730521	43730614	3,1,0	13,9,14	8,7,5	2,1,0	172	86	2.72049e-07	8.35993e-06	0.103,0.053,0.0	0.667,0.778,1.0	-0.763
ENSG00000140285	FGF7	15	+	49716228	49716780	49715454	49715637	49775347	49775451	4,8,3	71,65,58	5,4,4	0,3,0	172	86	6.36448e-07	1.85594e-05	0.027,0.058,0.025	1.0,0.4,1.0	-0.763
ENSG00000119689	DLST	14	+	75366625	75366699	75360050	75360127	75366991	75367075	3,6,8	20,28,16	4,6,4	1,0,0	109	61	5.98297e-06	0.000148154	0.077,0.107,0.219	0.691,1.0,1.0	-0.763
ENSG00000101384	JAG1	20	-	10624425	10624511	10623135	10623249	10625004	10625032	2,3,2	15,20,8	3,9,8	1,0,0	93	21	6.61314e-06	0.000162795	0.029,0.033,0.053	0.404,1.0,1.0	-0.763
ENSG00000137501	SYTL2	11	-	85418471	85418574	85411557	85411636	85429832	85429886	4,6,7	27,38,21	9,1,3	0,0,1	119	33	1.89232e-05	0.000426218	0.039,0.042,0.085	1.0,1.0,0.454	-0.763
ENSG00000107862	GBF1	10	+	104129617	104129741	104129467	104129532	104129930	104130002	3,9,8	13,14,26	3,3,5	0,0,1	123	37	0.000174582	0.00320835	0.065,0.162,0.085	1.0,1.0,0.601	-0.763
ENSG00000165495	PKNOX2	11	+	125104940	125105011	125034630	125034672	125221179	125221288	4,4,1	7,7,4	4,4,9	0,0,1	77	35	0.000348155	0.0059568	0.206,0.206,0.102	1.0,1.0,0.804	-0.763
ENSG00000138018	EPT1	2	+	26597907	26598016	26596234	26596497	26606166	26606215	0,1,2	5,8,1	8,1,6	1,0,0	128	42	0.00122879	0.0183219	0.0,0.039,0.396	0.724,1.0,1.0	-0.763
ENSG00000166833	NAV2	11	+	20122482	20122718	20119122	20119291	20124800	20124955	1,2,1	8,4,9	2,4,3	0,0,1	172	86	0.00124446	0.0185201	0.059,0.2,0.053	1.0,1.0,0.6	-0.763
ENSG00000157881	PANK4	1	-	2444326	2444478	2443066	2443122	2445440	2445528	8,1,3	14,4,9	5,5,1	0,1,0	130	44	0.00140202	0.0205697	0.162,0.078,0.101	1.0,0.629,1.0	-0.763
ENSG00000115504	EHBP1	2	+	63182651	63182795	63175394	63176297	63206322	63206470	2,0,1	5,4,11	5,2,4	0,0,2	172	86	0.00176764	0.0252728	0.167,0.0,0.043	1.0,1.0,0.5	-0.763
ENSG00000175216	CKAP5	11	-	46784176	46784312	46783549	46783743	46784525	46784729	9,5,4	15,12,8	16,16,22	0,1,0	172	86	1.39462e-11	7.24294e-10	0.231,0.172,0.2	1.0,0.889,1.0	-0.762
ENSG00000091640	SPAG7	17	-	4863528	4863613	4863316	4863406	4863753	4863842	2,1,3	12,18,16	12,12,10	0,2,2	149	79	1.59631e-10	7.45953e-09	0.081,0.029,0.09	1.0,0.761,0.726	-0.762
ENSG00000078269	SYNJ2	6	+	158510870	158510979	158509691	158509804	158513957	158514136	3,4,5	20,32,30	8,7,9	1,0,2	172	86	1.87781e-10	8.69014e-09	0.07,0.059,0.077	0.8,1.0,0.692	-0.762
ENSG00000035928	RFC1	4	-	39304679	39304771	39304356	39304494	39306433	39306548	0,1,0	9,25,17	8,4,8	1,2,0	170	86	4.28541e-08	1.47575e-06	0.0,0.02,0.0	0.802,0.503,1.0	-0.762
ENSG00000125952	MAX	14	-	65544630	65544754	65542803	65543381	65560425	65560533	2,1,9	13,10,10	16,10,18	0,2,0	172	86	1.04698e-07	3.40127e-06	0.071,0.048,0.31	1.0,0.714,1.0	-0.762
ENSG00000183431	SF3A3	1	-	38450378	38450451	38447400	38447483	38453244	38453350	1,6,7	15,19,12	5,9,5	0,0,1	122	76	2.21366e-06	5.89211e-05	0.04,0.164,0.267	1.0,1.0,0.757	-0.762
ENSG00000156469	MTERFD1	8	-	97270584	97270928	97269189	97269342	97273728	97273817	12,0,1	12,18,10	4,4,7	1,0,0	168	82	7.91e-05	0.001572	0.328,0.0,0.047	0.661,1.0,1.0	-0.762
ENSG00000092098	RNF31	14	+	24626525	24626613	24624811	24624901	24626728	24626847	6,5,11	37,33,39	2,5,2	0,2,0	159	83	0.000102821	0.00198634	0.078,0.073,0.128	1.0,0.566,1.0	-0.762
ENSG00000092098	RNF31	14	+	24626524	24626613	24624811	24624901	24626728	24626847	6,5,11	37,33,39	2,5,2	0,2,0	161	83	0.000103669	0.00200148	0.077,0.072,0.127	1.0,0.563,1.0	-0.762
ENSG00000138071	ACTR2	2	+	65482678	65482828	65480861	65480998	65488380	65488526	41,44,67	227238230	55,57,47	5,4,4	172	86	0	0	0.083,0.085,0.127	0.846,0.877,0.855	-0.761
ENSG00000144580	RQCD1	2	+	219449334	219449444	219447693	219447809	219452308	219452418	2,3,3	127129113	12,15,13	3,1,2	172	86	0	0	0.008,0.011,0.013	0.667,0.882,0.765	-0.761
ENSG00000009307	CSDE1	1	-	115273128	115273269	115272878	115273043	115275224	115275437	48,36,34	72,107,82	39,33,43	2,1,0	172	86	0	0	0.25,0.144,0.172	0.907,0.943,1.0	-0.761
ENSG00000140157	NIPA2	15	-	23014437	23014528	23012278	23012439	23021197	23021429	15,11,9	59,41,49	13,10,8	2,1,0	168	86	5.15921e-13	3.10721e-11	0.115,0.121,0.086	0.769,0.837,1.0	-0.761
ENSG00000132305	IMMT	2	-	86389098	86389202	86386369	86386794	86393630	86393767	12,10,11	22,18,27	12,16,15	0,0,1	172	86	2.25642e-12	1.26988e-10	0.214,0.217,0.169	1.0,1.0,0.882	-0.761
ENSG00000124486	USP9X	X	+	41078354	41078484	41077624	41077850	41082469	41082655	5,8,4	34,54,23	10,13,4	1,0,1	172	86	7.2502e-12	3.88032e-10	0.068,0.069,0.08	0.833,1.0,0.667	-0.761
ENSG00000175390	EIF3F	11	+	8013327	8013398	8008444	8009263	8013630	8013710	10,7,6	29,22,20	16,12,11	0,2,0	115	73	1.02985e-11	5.43009e-10	0.18,0.168,0.16	1.0,0.792,1.0	-0.761
ENSG00000099246	RAB18	10	+	27821435	27821508	27798803	27798859	27822663	27822782	20,13,19	60,58,43	7,6,5	0,0,1	95	49	8.39293e-08	2.77214e-06	0.147,0.104,0.186	1.0,1.0,0.721	-0.761
ENSG00000106462	EZH2	7	-	148523545	148523724	148516687	148516779	148524255	148524358	3,3,3	9,4,7	11,15,14	0,0,1	171	85	9.49715e-08	3.10963e-06	0.142,0.272,0.176	1.0,1.0,0.874	-0.761
ENSG00000108176	DNAJC12	10	-	69583071	69583150	69565340	69565545	69597691	69597922	2,1,1	26,25,23	2,1,1	0,0,1	144	86	0.000681096	0.0108162	0.044,0.023,0.025	1.0,1.0,0.374	-0.761
ENSG00000146376	ARHGAP18	6	-	129905132	129905257	129901214	129901276	129920360	129920501	8,12,16	41,44,46	92,79,118	5,6,8	141	55	0	0	0.071,0.096,0.119	0.878,0.837,0.852	-0.76
ENSG00000172531	PPP1CA	11	-	67167031	67167136	67166192	67166327	67168159	67168390	20,10,11	33,49,38	10,18,21	0,2,1	172	86	6.32827e-15	4.56692e-13	0.233,0.093,0.126	1.0,0.818,0.913	-0.76
ENSG00000023902	PLEKHO1	1	+	150128259	150128400	150123101	150123248	150129104	150129209	9,5,9	38,19,29	14,9,12	2,0,1	172	86	3.87024e-12	2.12714e-10	0.106,0.116,0.134	0.778,1.0,0.857	-0.76
ENSG00000070814	TCOF1	5	+	149767505	149767651	149759094	149759295	149769449	149769586	5,3,3	18,33,16	10,9,5	2,1,0	172	86	1.07863e-09	4.56411e-08	0.122,0.043,0.086	0.714,0.818,1.0	-0.76
ENSG00000140983	RHOT2	16	+	722702	722825	722253	722384	722927	723130	4,2,4	17,20,28	10,2,4	0,0,2	172	86	1.18621e-05	0.000279463	0.105,0.048,0.067	1.0,1.0,0.5	-0.76
ENSG00000204120	GIGYF2	2	+	233710441	233710596	233709078	233709284	233712057	233712281	6,1,5	15,27,16	4,5,3	0,0,1	172	86	1.99397e-05	0.000447495	0.167,0.018,0.135	1.0,1.0,0.6	-0.76
ENSG00000107789	MINPP1	10	+	89272880	89272978	89268092	89268290	89280792	89280926	2,3,2	7,5,6	9,7,6	0,1,0	172	86	3.27264e-05	0.000704607	0.125,0.231,0.143	1.0,0.778,1.0	-0.76
ENSG00000189057	FAM111B	11	+	58876140	58876185	58874709	58874769	58891651	58893909	0,2,0	5,2,6	17,8,4	0,0,1	43	53	0.00011237	0.00215448	0.0,0.552,0.0	1.0,1.0,0.831	-0.76
ENSG00000110987	BCL7A	12	+	122468605	122468687	122457327	122460089	122473236	122473333	5,0,0	31,16,24	2,3,1	0,0,1	150	86	0.000186621	0.00340397	0.085,0.0,0.0	1.0,1.0,0.364	-0.76
ENSG00000055917	PUM2	2	-	20494136	20494279	20483103	20483247	20507738	20507832	0,8,3	17,19,32	1,2,5	0,1,0	172	86	0.000195219	0.00354935	0.0,0.174,0.045	1.0,0.5,1.0	-0.76
ENSG00000161057	PSMC2	7	+	102994367	102994405	102988109	102988228	102995314	102995396	13,12,18	89,85,56	12,12,15	0,1,0	51	75	0	0	0.177,0.172,0.321	1.0,0.946,1.0	-0.759
ENSG00000232119	MCTS1	X	+	119739261	119739414	119737834	119738102	119739933	119740031	16,8,16	49,58,56	31,15,28	2,2,1	172	86	0	0	0.14,0.065,0.125	0.886,0.789,0.933	-0.759
ENSG00000009335	UBE3C	7	+	157013382	157013470	157009560	157009665	157015947	157016045	2,5,1	29,30,26	17,14,15	1,2,3	162	86	0	0	0.035,0.081,0.02	0.9,0.788,0.726	-0.759
ENSG00000177885	GRB2	17	-	73389631	73389846	73328780	73328878	73401569	73401790	3,2,4	77,80,90	8,9,4	1,4,0	172	86	1.84408e-13	1.16531e-11	0.019,0.012,0.022	0.8,0.529,1.0	-0.759
ENSG00000196365	LONP1	19	-	5699037	5699216	5696680	5696768	5700799	5700938	13,17,9	32,25,21	16,13,13	0,0,1	167	81	3.31468e-12	1.83558e-10	0.165,0.248,0.172	1.0,1.0,0.863	-0.759
ENSG00000120705	ETF1	5	-	137878521	137878625	137854380	137854556	137878785	137878989	8,4,4	14,9,15	8,12,13	1,0,0	172	86	1.55479e-08	5.69607e-07	0.222,0.182,0.118	0.8,1.0,1.0	-0.759
ENSG00000167977	KCTD5	16	+	2747906	2747998	2745935	2746044	2749821	2749917	13,11,16	72,73,72	9,12,5	4,0,0	170	86	3.67935e-08	1.28086e-06	0.084,0.071,0.101	0.532,1.0,1.0	-0.759
ENSG00000111790	FGFR1OP2	12	+	27107077	27107226	27091432	27091643	27109475	27109593	4,5,5	142127102	2,6,2	2,0,0	172	86	1.21893e-07	3.92401e-06	0.014,0.019,0.024	0.333,1.0,1.0	-0.759
ENSG00000259529	RP11-468E2.4	14	+	24626498	24626613	24624811	24624901	24626728	24626847	13,8,15	37,33,39	6,9,6	0,2,0	169	83	2.42271e-07	7.49314e-06	0.147,0.106,0.159	1.0,0.688,1.0	-0.759
ENSG00000140326	CDAN1	15	-	43026423	43026544	43026135	43026245	43027297	43027376	1,0,1	2,5,2	44,40,45	1,3,4	158	72	2.91279e-07	8.91804e-06	0.186,0.0,0.186	0.952,0.859,0.837	-0.759
ENSG00000087263	OGFOD1	16	+	56503914	56503994	56501816	56501930	56504398	56504703	6,3,2	19,27,25	8,4,2	0,0,1	146	86	5.0157e-06	0.00012614	0.157,0.061,0.045	1.0,1.0,0.541	-0.759
ENSG00000138814	PPP3CA	4	-	102117072	102117273	102030110	102030235	102267895	102268637	3,5,5	19,33,29	6,6,2	0,0,1	172	86	5.72203e-06	0.000142408	0.073,0.07,0.079	1.0,1.0,0.5	-0.759
ENSG00000114062	UBE3A	15	-	25601038	25601203	25599674	25599830	25601837	25602043	10,3,7	19,16,16	3,7,6	0,0,1	172	86	1.2044e-05	0.000283107	0.208,0.086,0.179	1.0,1.0,0.75	-0.759
ENSG00000100526	CDKN3	14	+	54882616	54882648	54878201	54878424	54884565	54884669	0,2,0	11,13,8	3,5,6	1,2,2	50	86	1.43482e-05	0.00033287	0.0,0.209,0.0	0.838,0.811,0.838	-0.759
ENSG00000006744	ELAC2	17	-	12906795	12906891	12905757	12905896	12908305	12908418	1,3,2	4,6,7	9,5,11	0,1,0	172	86	2.759e-05	0.000602248	0.111,0.2,0.125	1.0,0.714,1.0	-0.759
ENSG00000163444	TMEM183A	1	+	202984016	202984176	202977770	202977938	202985087	202985268	2,2,6	17,26,20	4,2,5	0,1,0	172	86	3.07678e-05	0.000666474	0.056,0.037,0.13	1.0,0.5,1.0	-0.759
ENSG00000143164	DCAF6	1	+	168013822	168013909	168012262	168012378	168014137	168014465	3,2,4	8,9,8	2,3,6	0,0,1	160	86	0.000613368	0.00986396	0.168,0.107,0.212	1.0,1.0,0.763	-0.759
ENSG00000185104	FAF1	1	-	51267302	51267349	51204534	51204626	51323600	51323669	2,0,0	10,7,5	3,3,2	0,1,1	55	61	0.00129282	0.0191573	0.182,0.0,0.0	1.0,0.769,0.689	-0.759
ENSG00000143870	PDIA6	2	-	10937825	10937883	10937206	10937333	10942624	10942766	150131108	322363366	85,95,94	0,1,0	102	86	0	0	0.282,0.233,0.199	1.0,0.988,1.0	-0.758
ENSG00000127314	RAP1B	12	+	69045774	69045831	69044179	69044248	69047891	69048032	61,65,62	695570436744	52,53,49	22,20,2	76	62	0	0	0.007,0.007,0.007	0.658,0.684,0.952	-0.758
ENSG00000167548	MLL2	12	-	49437982	49438087	49437650	49437781	49438185	49438305	15,25,22	36,36,32	48,42,77	1,0,0	172	86	0	0	0.172,0.258,0.256	0.96,1.0,1.0	-0.758
ENSG00000175063	UBE2C	20	+	44442075	44442103	44441312	44441435	44444492	44444552	3,3,6	32,40,31	8,12,8	0,0,1	21	53	3.9968e-15	2.92335e-13	0.191,0.159,0.328	1.0,1.0,0.953	-0.758
ENSG00000214046	C19orf42	19	-	16763415	16763772	16756471	16758072	16770769	16770811	28,29,36	107123107	12,18,3	1,2,0	121	35	7.25753e-13	4.29001e-11	0.07,0.064,0.089	0.776,0.722,1.0	-0.758
ENSG00000139746	RBM26	13	-	79908478	79908565	79896483	79896597	79911236	79911437	16,12,15	33,31,32	11,11,11	0,1,0	160	86	3.52475e-11	1.74608e-09	0.207,0.172,0.201	1.0,0.855,1.0	-0.758
ENSG00000137710	RDX	11	-	110135503	110135599	110134684	110134959	110143260	110143344	8,10,8	20,14,19	15,5,12	0,0,1	163	77	4.96453e-09	1.92771e-07	0.159,0.252,0.166	1.0,1.0,0.85	-0.758
ENSG00000180370	PAK2	3	+	196541321	196541439	196539609	196539722	196544927	196545027	8,6,8	15,23,16	11,8,11	0,1,0	172	86	5.70617e-09	2.20468e-07	0.211,0.115,0.2	1.0,0.8,1.0	-0.758
ENSG00000160993	ALKBH4	7	-	102100050	102100157	102097280	102098428	102105160	102105310	4,4,9	18,9,10	13,10,9	1,0,0	172	86	6.62748e-08	2.22623e-06	0.1,0.182,0.31	0.867,1.0,1.0	-0.758
ENSG00000108788	MLX	17	+	40721221	40721321	40720854	40720961	40721524	40721624	0,4,2	15,9,9	7,5,7	0,2,0	172	86	2.07198e-05	0.000463165	0.0,0.182,0.1	1.0,0.556,1.0	-0.758
ENSG00000163848	ZNF148	3	-	124997967	124998091	124953054	124953173	125006946	125007072	6,2,2	11,23,13	3,3,6	1,0,0	172	86	5.63074e-05	0.00115346	0.214,0.042,0.071	0.6,1.0,1.0	-0.758
ENSG00000162692	VCAM1	1	+	101194662	101194938	101190179	101190446	101196753	101197074	1,1,0	15,19,24	2,5,1	0,0,1	172	86	9.31261e-05	0.00181995	0.032,0.026,0.0	1.0,1.0,0.333	-0.758
ENSG00000187239	FNBP1	9	-	132686122	132686218	132671168	132671278	132687238	132687436	2,0,1	29,15,19	3,3,3	3,0,0	172	86	0.000236494	0.00421605	0.033,0.0,0.026	0.333,1.0,1.0	-0.758
ENSG00000187239	FNBP1	9	-	132686122	132686305	132671168	132671278	132687238	132687436	2,0,1	29,15,19	3,1,3	3,0,0	172	86	0.000253777	0.004492	0.033,0.0,0.026	0.333,1.0,1.0	-0.758
ENSG00000173145	NOC3L	10	-	96104171	96104272	96101429	96101502	96104609	96104690	1,0,2	5,9,8	2,8,3	1,0,0	140	54	0.000450669	0.00748996	0.072,0.0,0.088	0.435,1.0,1.0	-0.758
ENSG00000163939	PBRM1	3	-	52702513	52702661	52696219	52696292	52712515	52712613	2,2,1	9,2,7	5,6,2	0,1,0	152	66	0.000673146	0.0107036	0.088,0.303,0.058	1.0,0.723,1.0	-0.758
ENSG00000036054	TBC1D23	3	+	100030676	100030721	100029246	100029386	100034942	100035031	6,4,7	36,48,62	37,30,41	8,5,4	72	82	0	0	0.16,0.087,0.114	0.84,0.872,0.921	-0.757
ENSG00000135446	CDK4	12	-	58144705	58144873	58143236	58143287	58145282	58145519	5,14,12	21,28,28	24,13,24	2,1,0	130	44	8.21565e-15	5.86439e-13	0.075,0.145,0.127	0.802,0.815,1.0	-0.757
ENSG00000076382	SPAG5	17	-	26906768	26906855	26906382	26906503	26907026	26907138	1,0,1	17,18,14	12,11,7	0,1,4	160	86	1.21742e-08	4.52264e-07	0.031,0.0,0.037	1.0,0.855,0.485	-0.757
ENSG00000135778	NTPCR	1	+	233091302	233091465	233086369	233086490	233105654	233105864	4,2,3	8,14,7	5,5,10	1,0,0	172	86	9.68193e-06	0.000231472	0.2,0.067,0.176	0.714,1.0,1.0	-0.757
ENSG00000089022	MAPKAPK5	12	+	112326688	112326810	112326291	112326422	112327843	112327948	3,1,3	4,8,5	11,10,6	0,1,0	172	86	1.62802e-05	0.000372449	0.273,0.059,0.231	1.0,0.833,1.0	-0.757
ENSG00000128944	C15orf23	15	+	40678605	40678695	40675428	40675523	40681706	40681812	1,0,2	13,2,5	7,8,4	0,1,1	166	86	2.6938e-05	0.000589462	0.038,0.0,0.172	1.0,0.806,0.675	-0.757
ENSG00000204256	BRD2	6	+	32945193	32945347	32944345	32944713	32945533	32945678	2,5,2	4,9,10	4,7,4	0,1,0	172	86	0.000171115	0.00315302	0.2,0.217,0.091	1.0,0.778,1.0	-0.757
ENSG00000139197	PEX5	12	+	7344164	7344296	7343821	7343954	7351606	7351709	1,3,2	3,6,9	5,6,5	0,0,1	172	86	0.000229616	0.00410342	0.143,0.2,0.1	1.0,1.0,0.714	-0.757
ENSG00000169446	MMGT1	X	-	135053216	135053269	135049548	135049652	135055755	135056222	3,1,2	28,32,18	2,1,1	0,1,0	92	86	0.000820716	0.0127728	0.091,0.028,0.094	1.0,0.483,1.0	-0.757
ENSG00000141564	RPTOR	17	+	78899169	78899280	78882610	78882729	78914295	78914401	0,0,2	20,14,15	2,2,1	0,2,0	172	86	0.0017572	0.0251516	0.0,0.0,0.063	1.0,0.333,1.0	-0.757
ENSG00000132694	ARHGEF11	1	-	156941488	156941608	156939789	156939835	156946774	156946846	3,6,0	2,2,1	29,26,22	0,1,0	104	18	0.00243127	0.0334356	0.206,0.342,0.0	1.0,0.818,1.0	-0.757
ENSG00000029993	HMGB3	X	+	150155600	150155775	150154523	150154663	150156249	150156405	47,51,44	68,84,83	67,61,62	0,0,1	172	86	0	0	0.257,0.233,0.21	1.0,1.0,0.969	-0.756
ENSG00000179222	MAGED1	X	+	51641676	51641739	51640890	51641289	51643277	51643392	32,49,32	112,86,89	39,42,39	0,0,1	112	86	0	0	0.18,0.304,0.216	1.0,1.0,0.968	-0.756
ENSG00000150961	SEC24D	4	-	119726997	119727109	119718837	119718965	119736182	119736310	8,6,7	14,17,22	10,7,10	0,1,0	172	86	2.8065e-08	9.92086e-07	0.222,0.15,0.137	1.0,0.778,1.0	-0.756
ENSG00000165458	INPPL1	11	+	71944484	71944566	71943918	71944018	71944698	71944788	9,11,10	34,39,30	5,8,5	0,2,0	147	83	6.5155e-07	1.89643e-05	0.13,0.137,0.158	1.0,0.693,1.0	-0.756
ENSG00000120805	ARL1	12	-	101796919	101797033	101794839	101794951	101799621	101799759	5,1,2	58,79,56	3,2,1	0,0,1	172	86	5.84726e-06	0.000145176	0.041,0.006,0.018	1.0,1.0,0.333	-0.756
ENSG00000197785	ATAD3A	1	+	1455927	1455997	1455520	1455686	1458890	1458947	1,1,1	9,6,7	6,11,4	2,1,0	90	50	1.83756e-05	0.000414861	0.058,0.085,0.074	0.625,0.859,1.0	-0.756
ENSG00000077782	FGFR1	8	-	38285863	38285953	38285438	38285611	38314873	38315052	3,1,2	14,7,5	3,4,6	0,0,2	166	86	0.000406759	0.00683909	0.1,0.069,0.172	1.0,1.0,0.608	-0.756
ENSG00000068308	OTUD5	X	-	48791736	48791885	48783122	48783326	48791983	48792140	0,7,3	2,5,7	8,9,12	0,0,1	172	86	0.000522279	0.00853696	0.0,0.412,0.176	1.0,1.0,0.857	-0.756
ENSG00000121940	CLCC1	1	-	109484026	109484120	109482666	109482764	109490232	109490340	2,1,0	4,1,7	8,3,6	1,0,0	172	86	0.000793901	0.0124066	0.2,0.333,0.0	0.8,1.0,1.0	-0.756
ENSG00000100129	EIF3L	22	+	38251571	38251651	38247286	38247497	38266182	38266280	12,21,12	38,37,25	14,26,17	1,0,0	146	86	0	0	0.157,0.251,0.22	0.892,1.0,1.0	-0.755
ENSG00000156976	EIF4A2	3	+	186503671	186503840	186502352	186502485	186503952	186504062	38,48,37	336337288	32,30,34	5,4,2	172	86	0	0	0.054,0.066,0.06	0.762,0.789,0.895	-0.755
ENSG00000196531	NACA	12	-	57118235	57118307	57108385	57108471	57119046	57119085	63,55,63	68,91,77	64,81,58	1,1,0	69	25	0	0	0.251,0.18,0.229	0.959,0.967,1.0	-0.755
ENSG00000169188	APEX2	X	+	55028683	55028864	55027978	55028062	55029394	55029541	7,10,8	20,26,16	89,109,82	8,5,0	163	77	0	0	0.142,0.154,0.191	0.84,0.911,1.0	-0.755
ENSG00000185721	DRG1	22	+	31806997	31807067	31796605	31796729	31816241	31816411	14,21,13	81,53,47	13,8,15	1,1,0	126	86	9.99201e-16	7.6312e-14	0.106,0.213,0.159	0.899,0.845,1.0	-0.755
ENSG00000188976	NOC2L	1	-	889383	889462	889161	889272	891302	891393	3,2,1	26,12,17	8,13,17	1,2,2	142	84	8.54872e-15	6.09864e-13	0.064,0.09,0.034	0.826,0.794,0.834	-0.755
ENSG00000074657	ZNF532	18	+	56648701	56648849	56646286	56646399	56651203	56653712	3,4,8	25,11,17	11,7,4	0,0,1	172	86	6.3697e-07	1.85703e-05	0.057,0.154,0.19	1.0,1.0,0.667	-0.755
ENSG00000089289	IGBP1	X	+	69354372	69354666	69353298	69353985	69366482	69366678	4,3,5	11,11,6	10,7,10	1,0,0	172	86	1.0798e-06	3.02208e-05	0.154,0.12,0.294	0.833,1.0,1.0	-0.755
ENSG00000149636	DSN1	20	-	35399275	35399596	35386960	35387020	35402064	35402184	2,0,4	3,1,2	31,26,24	0,0,1	139	53	0.000168281	0.00310723	0.203,0.0,0.433	1.0,1.0,0.901	-0.755
ENSG00000107186	MPDZ	9	-	13136710	13136802	13136090	13136181	13137955	13138152	3,4,2	9,5,7	9,3,4	1,0,0	168	84	0.000215322	0.00387411	0.143,0.286,0.125	0.818,1.0,1.0	-0.755
ENSG00000161800	RACGAP1	12	-	50410413	50410502	50396029	50396083	50419180	50419244	1,1,2	9,1,2	6,6,8	0,0,1	96	18	0.000561338	0.00910298	0.02,0.158,0.158	1.0,1.0,0.6	-0.755
ENSG00000100567	PSMA3	14	+	58737651	58737716	58736692	58737203	58738568	58738722	14,15,8	22,37,35	26,20,31	0,0,1	116	86	0	0	0.321,0.231,0.145	1.0,1.0,0.958	-0.754
ENSG00000122786	CALD1	7	+	134617738	134618828	134613504	134613651	134625842	134625988	27,26,28	46,46,41	53,37,55	1,0,0	172	86	0	0	0.227,0.22,0.255	0.964,1.0,1.0	-0.754
ENSG00000123200	ZC3H13	13	-	46619525	46619651	46594583	46594692	46626538	46626820	13,6,10	22,15,18	29,22,28	0,0,2	172	86	3.33067e-16	2.64431e-14	0.228,0.167,0.217	1.0,1.0,0.875	-0.754
ENSG00000034063	UHRF1	19	+	4945872	4945977	4944354	4944462	4947116	4947223	2,3,3	27,35,24	11,12,11	3,2,0	172	86	1.21403e-12	7.01634e-11	0.036,0.041,0.059	0.647,0.75,1.0	-0.754
ENSG00000004897	CDC27	17	-	45219218	45219388	45216104	45216257	45219594	45219802	2,1,4	42,48,34	7,9,5	2,0,1	172	86	1.48215e-12	8.47541e-11	0.023,0.01,0.056	0.636,1.0,0.714	-0.754
ENSG00000135387	CAPRIN1	11	+	34104501	34104588	34104371	34104424	34107610	34107766	12,5,7	11,19,12	17,12,13	0,0,1	120	46	7.05902e-09	2.69477e-07	0.295,0.092,0.183	1.0,1.0,0.833	-0.754
ENSG00000100330	MTMR3	22	+	30403102	30403308	30398868	30398982	30405006	30405118	4,3,1	10,30,21	3,2,3	0,1,0	172	86	9.53747e-05	0.00185777	0.167,0.048,0.023	1.0,0.5,1.0	-0.754
ENSG00000181555	SETD2	3	-	47129602	47129737	47125209	47125872	47139444	47139571	1,1,0	11,17,13	1,1,4	1,0,0	172	86	0.00195473	0.0275709	0.043,0.029,0.0	0.333,1.0,1.0	-0.754
ENSG00000157985	AGAP1	2	+	236877105	236877267	236817485	236817550	236945204	236945359	10,10,7	10,10,21	51,43,49	0,0,1	144	58	0	0	0.287,0.287,0.118	1.0,1.0,0.952	-0.753
ENSG00000137267	TUBB2A	6	-	3155858	3155969	3153902	3155157	3156277	3156386	22,11,22	34,50,52	26,26,20	2,0,1	172	86	0	0	0.244,0.099,0.175	0.867,1.0,0.909	-0.753
ENSG00000214078	CPNE1	20	-	34220084	34220156	34219866	34219947	34220232	34220307	19,12,22	51,61,48	33,35,26	0,2,3	100	56	0	0	0.173,0.099,0.204	1.0,0.907,0.829	-0.753
ENSG00000142507	PSMB6	17	+	4700732	4700864	4700022	4700090	4700976	4701106	21,26,13	79,66,62	25,34,31	3,2,1	147	61	0	0	0.099,0.141,0.08	0.776,0.876,0.928	-0.753
ENSG00000129657	SEC14L1	17	+	75192283	75192393	75190758	75190993	75196565	75196755	7,6,4	16,25,18	13,7,9	1,1,0	172	86	7.79344e-10	3.34779e-08	0.179,0.107,0.1	0.867,0.778,1.0	-0.753
ENSG00000021645	NRXN3	14	+	80271454	80271533	80163972	80164280	80327381	80328821	1,4,4	9,9,6	20,13,28	1,0,2	144	86	1.26537e-09	5.30023e-08	0.062,0.21,0.285	0.923,1.0,0.893	-0.753
ENSG00000111676	ATN1	12	+	7050536	7050717	7050042	7050186	7050909	7051482	14,10,9	29,23,34	9,6,14	0,1,0	172	86	3.08593e-09	1.2305e-07	0.194,0.179,0.117	1.0,0.75,1.0	-0.753
ENSG00000132356	PRKAA1	5	-	40775511	40775605	40771820	40771965	40777546	40777688	2,0,2	8,18,8	7,5,11	2,0,1	172	86	2.89893e-07	8.87778e-06	0.111,0.0,0.111	0.636,1.0,0.846	-0.753
ENSG00000175390	EIF3F	11	+	8013327	8013518	8008902	8009263	8013630	8013710	9,5,7	29,22,20	13,7,6	0,2,0	159	73	3.12263e-07	9.52303e-06	0.125,0.094,0.138	1.0,0.616,1.0	-0.753
ENSG00000091651	ORC6	16	+	46729928	46729997	46729473	46729586	46731369	46732306	0,3,3	5,5,6	11,18,7	1,1,0	124	86	7.16035e-06	0.00017533	0.0,0.294,0.257	0.884,0.926,1.0	-0.753
ENSG00000147133	TAF1	X	+	70613150	70613326	70612724	70612844	70613916	70614095	1,0,1	19,27,10	1,9,2	1,0,0	172	86	2.87597e-05	0.000625369	0.026,0.0,0.048	0.333,1.0,1.0	-0.753
ENSG00000107789	MINPP1	10	+	89280792	89280926	89268092	89268290	89311838	89312843	7,5,6	41,27,36	4,4,2	0,2,0	172	86	5.45331e-05	0.00112043	0.079,0.085,0.077	1.0,0.5,1.0	-0.753
ENSG00000151726	ACSL1	4	-	185687044	185687140	185686006	185686079	185687775	185687856	0,0,1	14,21,20	2,3,2	2,0,0	140	54	0.000143726	0.00269406	0.0,0.0,0.019	0.278,1.0,1.0	-0.753
ENSG00000166128	RAB8B	15	+	63536954	63537015	63481792	63481947	63547705	63547783	1,1,5	8,17,14	2,2,3	0,1,0	93	71	0.0010552	0.0159728	0.087,0.043,0.214	1.0,0.604,1.0	-0.753
ENSG00000115020	PIKFYVE	2	+	209216075	209216179	209215494	209215671	209217377	209217506	21,12,12	23,19,32	113,97,104	2,0,0	172	86	0	0	0.313,0.24,0.158	0.966,1.0,1.0	-0.752
ENSG00000011426	ANLN	7	+	36464153	36464202	36463425	36463552	36464294	36464351	8,13,11	47,48,50	14,15,14	1,1,1	48	50	0	0	0.151,0.22,0.186	0.936,0.94,0.936	-0.752
ENSG00000135446	CDK4	12	-	58144989	58145125	58143236	58143287	58145957	58146105	65,71,70	609636643	56,73,84	7,5,7	130	44	0	0	0.035,0.036,0.036	0.73,0.832,0.802	-0.752
ENSG00000178719	GRINA	8	+	145066045	145066117	145065914	145065972	145066412	145066541	16,5,12	69,79,66	21,32,14	2,3,2	95	51	0	0	0.111,0.033,0.089	0.849,0.851,0.79	-0.752
ENSG00000091140	DLD	7	+	107533644	107533723	107531617	107531734	107542182	107542262	9,18,11	47,27,19	25,21,32	0,1,1	131	73	0	0	0.096,0.271,0.244	1.0,0.921,0.947	-0.752
ENSG00000198960	ARMCX6	X	-	100872492	100872574	100870109	100871756	100872874	100872966	5,17,6	102,99,97	18,12,13	0,3,3	149	85	0	0	0.027,0.089,0.034	1.0,0.695,0.712	-0.752
ENSG00000154473	BUB3	10	+	124914433	124914628	124913930	124914001	124915173	124915243	27,21,11	23,28,23	30,19,20	0,1,0	127	41	2.96208e-13	1.84003e-11	0.275,0.195,0.134	1.0,0.86,1.0	-0.752
ENSG00000005007	UPF1	19	+	18961496	18961677	18960883	18961051	18962943	18963105	11,11,8	33,30,25	9,8,7	2,0,0	172	86	1.2356e-07	3.97358e-06	0.143,0.155,0.138	0.692,1.0,1.0	-0.752
ENSG00000113810	SMC4	3	+	160119777	160119881	160117437	160117537	160120463	160120655	1,2,1	14,2,12	11,7,9	1,0,1	172	86	4.25203e-07	1.27456e-05	0.034,0.333,0.04	0.846,1.0,0.818	-0.752
ENSG00000100395	L3MBTL2	22	+	41615422	41615540	41613126	41613206	41616737	41616872	2,1,4	14,23,24	5,3,8	0,2,0	159	73	1.16302e-05	0.000274364	0.062,0.02,0.071	1.0,0.408,1.0	-0.752
ENSG00000108349	CASC3	17	+	38325850	38325915	38325576	38325699	38326699	38328431	4,1,4	12,11,7	6,7,4	1,0,0	116	86	1.87525e-05	0.000422527	0.198,0.063,0.298	0.816,1.0,1.0	-0.752
ENSG00000067066	SP100	2	+	231314886	231314970	231314275	231314425	231327149	231327344	4,1,2	9,3,8	5,7,4	1,0,0	154	86	0.000169622	0.00312875	0.199,0.157,0.123	0.736,1.0,1.0	-0.752
ENSG00000183808	RBM12B	8	-	94752856	94752924	94748271	94748666	94753108	94753184	5,0,1	9,2,4	18,6,7	0,2,0	105	69	0.000252609	0.00447386	0.267,0.0,0.141	1.0,0.663,1.0	-0.752
ENSG00000005700	IBTK	6	-	82925792	82925967	82923943	82924546	82927676	82927854	3,0,2	9,4,4	5,7,3	0,0,1	172	86	0.000904366	0.013949	0.143,0.0,0.2	1.0,1.0,0.6	-0.752
ENSG00000161011	SQSTM1	5	+	179252145	179252226	179251181	179251323	179260031	179260386	17,22,22	48,48,54	43,39,29	1,2,1	148	86	0	0	0.171,0.21,0.191	0.962,0.919,0.944	-0.751
ENSG00000076924	XAB2	19	-	7685432	7685555	7685160	7685332	7685731	7685922	19,29,24	29,56,35	199208207	1,2,1	172	86	0	0	0.247,0.206,0.255	0.99,0.981,0.99	-0.751
ENSG00000234545	FAM133B	7	-	92195323	92195375	92190450	92191682	92199136	92199229	2,1,6	148150136	7,13,10	4,1,3	90	86	0	0	0.013,0.006,0.04	0.626,0.925,0.761	-0.751
ENSG00000090924	PLEKHG2	19	+	39911588	39911636	39911390	39911492	39911922	39911939	3,9,3	16,11,10	11,12,15	0,1,1	41	10	9.345e-09	3.51781e-07	0.044,0.166,0.068	1.0,0.745,0.785	-0.751
ENSG00000196961	AP2A1	19	+	50304217	50304315	50303224	50303407	50304646	50304878	5,2,3	9,18,9	16,16,12	0,0,3	172	86	2.94334e-08	1.0377e-06	0.217,0.053,0.143	1.0,1.0,0.667	-0.751
ENSG00000101391	CDK5RAP1	20	-	31960447	31960503	31958304	31958435	31961920	31962018	4,0,3	9,4,6	14,12,24	0,2,0	98	86	2.84816e-07	8.73304e-06	0.281,0.0,0.305	1.0,0.84,1.0	-0.751
ENSG00000039560	RAI14	5	+	34813678	34813765	34811871	34812050	34814687	34814774	11,12,10	192183194	1,4,7	1,0,0	154	80	5.51053e-07	1.62597e-05	0.029,0.033,0.026	0.342,1.0,1.0	-0.751
ENSG00000134153	C15orf24	15	-	34382517	34382656	34376530	34376687	34388095	34388215	10,18,5	24,28,20	5,6,7	0,0,1	172	86	3.21674e-06	8.34609e-05	0.172,0.243,0.111	1.0,1.0,0.778	-0.751
ENSG00000137693	YAP1	11	+	102056748	102056862	102033186	102033302	102076623	102076805	7,5,2	16,12,8	9,5,6	0,1,0	172	86	7.57644e-06	0.0001849	0.179,0.172,0.111	1.0,0.714,1.0	-0.751
ENSG00000108963	DPH1	17	+	1943048	1943117	1940128	1940250	1943511	1943668	1,2,3	11,9,7	9,6,6	0,2,0	124	86	1.45519e-05	0.000337092	0.059,0.134,0.229	1.0,0.675,1.0	-0.751
ENSG00000090863	GLG1	16	-	74496385	74496528	74493579	74493687	74497253	74497377	8,5,3	15,21,9	5,5,5	1,0,0	172	86	2.11583e-05	0.000471612	0.211,0.106,0.143	0.714,1.0,1.0	-0.751
ENSG00000169062	UPF3A	13	+	115057078	115057267	115051993	115052104	115064314	115064475	1,2,3	3,6,7	9,5,12	0,1,0	172	86	3.50731e-05	0.000750074	0.143,0.143,0.176	1.0,0.714,1.0	-0.751
ENSG00000171466	ZNF562	19	-	9770054	9770143	9767222	9767329	9771395	9771550	1,1,0	7,2,6	5,4,8	1,0,1	164	86	0.000145698	0.00272787	0.07,0.208,0.0	0.724,1.0,0.808	-0.751
ENSG00000163785	RYK	3	-	133926315	133926369	133921573	133921718	133928538	133928673	2,3,1	13,17,6	2,2,5	0,1,0	94	86	0.000317529	0.00548702	0.123,0.139,0.132	1.0,0.647,1.0	-0.751
ENSG00000115464	USP34	2	-	61492531	61492692	61486845	61486911	61493118	61493302	1,3,0	15,11,7	6,1,3	4,0,0	145	59	0.00200801	0.0282169	0.026,0.1,0.0	0.379,1.0,1.0	-0.751
ENSG00000118705	RPN2	20	+	35826799	35826895	35812569	35812776	35833169	35833304	41,43,42	155171116	44,31,33	4,1,3	172	86	0	0	0.117,0.112,0.153	0.846,0.939,0.846	-0.75
ENSG00000115364	MRPL19	2	+	75879267	75879386	75874104	75874345	75879648	75879783	13,11,8	54,36,36	11,14,15	0,1,3	172	86	5.51559e-13	3.30903e-11	0.107,0.133,0.1	1.0,0.875,0.714	-0.75
ENSG00000164654	MIOS	7	+	7607656	7607754	7607237	7607319	7612066	7612298	1,0,0	14,15,15	5,6,3	1,0,1	161	75	9.34711e-08	3.06292e-06	0.032,0.0,0.0	0.7,1.0,0.583	-0.75
ENSG00000105856	HBP1	7	+	106836278	106836596	106826245	106826387	106840604	106840746	17,10,9	51,44,38	10,3,6	0,1,0	172	86	5.42588e-07	1.60365e-05	0.143,0.102,0.106	1.0,0.6,1.0	-0.75
ENSG00000145191	EIF2B5	3	+	183854399	183854524	183853172	183853368	183859712	183859858	6,5,4	18,26,15	6,3,9	2,0,0	172	86	7.49508e-06	0.000183103	0.143,0.088,0.118	0.6,1.0,1.0	-0.75
ENSG00000180900	SCRIB	8	-	144896170	144896288	144895987	144896066	144897383	144897549	1,2,3	4,7,2	13,13,15	0,0,1	158	72	1.38518e-05	0.000322014	0.102,0.115,0.406	1.0,1.0,0.872	-0.75
ENSG00000110514	MADD	11	+	47330831	47330952	47330141	47330250	47331057	47331163	2,2,3	14,11,6	6,3,3	0,1,0	172	86	0.000194471	0.00353627	0.067,0.083,0.2	1.0,0.6,1.0	-0.75
ENSG00000106443	PHF14	7	+	11062494	11062606	11030329	11030474	11068307	11068445	3,3,3	12,7,7	6,2,5	0,0,1	172	86	0.000237904	0.00423814	0.111,0.176,0.176	1.0,1.0,0.714	-0.75
ENSG00000182718	ANXA2	15	-	60648117	60648197	60646352	60646412	60649344	60649435	39,31,49	63,63,53	35,55,41	0,0,1	111	51	0	0	0.221,0.184,0.298	1.0,1.0,0.95	-0.749
ENSG00000159131	GART	21	-	34903794	34903863	34903015	34903190	34904650	34904762	2,7,9	11,12,19	12,12,7	1,0,0	124	86	1.83602e-08	6.66558e-07	0.112,0.288,0.247	0.893,1.0,1.0	-0.749
ENSG00000082701	GSK3B	3	-	119595259	119595355	119582265	119582452	119624601	119624699	6,3,10	36,43,32	1,7,5	0,1,1	172	86	1.82157e-07	5.73648e-06	0.077,0.034,0.135	1.0,0.778,0.714	-0.749
ENSG00000168952	STXBP6	14	-	25443870	25444056	25326232	25326363	25479730	25479846	23,12,13	31,42,53	144151125	5,7,7	172	86	0	0	0.271,0.125,0.109	0.935,0.915,0.899	-0.748
ENSG00000106028	SSBP1	7	+	141438923	141438990	141438157	141438303	141441968	141442029	38,61,46	111106102	65,67,55	2,0,2	88	54	0	0	0.174,0.261,0.217	0.952,1.0,0.944	-0.748
ENSG00000158669	AGPAT6	8	+	41472481	41472567	41471904	41471960	41476202	41476331	6,16,10	18,25,19	16,18,11	1,1,0	121	49	1.59143e-11	8.20686e-10	0.119,0.206,0.176	0.866,0.879,1.0	-0.748
ENSG00000049541	RFC2	7	-	73660991	73661093	73657475	73657576	73664068	73664110	3,6,6	19,19,17	21,16,10	1,3,0	121	35	8.21795e-10	3.5168e-08	0.044,0.084,0.093	0.859,0.607,1.0	-0.748
ENSG00000164830	OXR1	8	+	107758016	107758090	107754449	107754545	107763033	107763401	6,6,9	28,21,23	6,8,4	0,0,1	134	86	5.48394e-07	1.61889e-05	0.121,0.155,0.201	1.0,1.0,0.72	-0.748
ENSG00000115274	INO80B	2	+	74682944	74683063	74682532	74682725	74683229	74683399	2,4,5	21,9,17	5,6,3	0,0,1	172	86	2.67837e-05	0.000586396	0.045,0.182,0.128	1.0,1.0,0.6	-0.748
ENSG00000115652	UXS1	2	-	106715171	106715229	106713173	106713277	106717513	106717574	3,4,0	6,8,2	16,8,9	1,0,1	70	54	3.22941e-05	0.000696504	0.278,0.278,0.0	0.925,1.0,0.874	-0.748
ENSG00000103264	FBXO31	16	-	87393900	87393972	87380779	87380856	87417010	87417394	1,4,4	11,18,16	2,2,8	1,0,0	114	70	0.000123222	0.00234408	0.053,0.12,0.133	0.551,1.0,1.0	-0.748
ENSG00000070778	PTPN21	14	-	88952125	88952186	88951419	88951504	88962756	88962836	2,1,2	7,7,7	6,5,3	0,0,1	87	65	0.000195674	0.00355659	0.176,0.096,0.176	1.0,1.0,0.691	-0.748
ENSG00000169826	CSGALNACT2	10	+	43654162	43654379	43650344	43651258	43671398	43671480	2,1,2	9,9,9	2,5,5	1,0,0	161	75	0.000394701	0.00665974	0.094,0.049,0.094	0.482,1.0,1.0	-0.748
ENSG00000165660	FAM175B	10	+	126507952	126508019	126495399	126495490	126515163	126515354	0,1,4	7,4,4	10,2,6	0,0,1	118	84	0.000676208	0.0107482	0.0,0.151,0.416	1.0,1.0,0.81	-0.748
ENSG00000011566	MAP4K3	2	-	39552658	39552769	39542450	39542529	39552870	39552952	3,2,0	7,13,2	3,6,4	0,0,2	147	61	0.00185642	0.0263814	0.151,0.06,0.0	1.0,1.0,0.454	-0.748
ENSG00000127863	TNFRSF19	13	+	24242118	24242221	24200845	24200931	24247510	24247638	37,46,49	133,98,97	81,63,54	1,6,2	165	79	0	0	0.118,0.183,0.195	0.975,0.834,0.928	-0.747
ENSG00000130985	UBA1	X	+	47060292	47060399	47058878	47059013	47060674	47060765	9,12,9	27,26,33	13,14,21	0,2,1	170	84	1.89848e-13	1.19847e-11	0.141,0.186,0.119	1.0,0.776,0.912	-0.747
ENSG00000101294	HM13	20	+	30125981	30126064	30115286	30115385	30137866	30137924	8,13,6	22,11,15	15,17,14	1,0,0	117	51	9.4583e-10	4.02408e-08	0.137,0.34,0.148	0.867,1.0,1.0	-0.747
ENSG00000142657	PGD	1	+	10460449	10460629	10459685	10459761	10464217	10464336	2,6,3	13,11,17	6,6,4	0,2,0	155	69	6.99611e-05	0.00140686	0.064,0.195,0.073	1.0,0.572,1.0	-0.747
ENSG00000099968	BCL2L13	22	+	18185008	18185152	18138427	18138598	18209442	18211487	4,6,3	14,13,32	3,3,1	0,1,0	172	86	0.00047472	0.007843	0.125,0.188,0.045	1.0,0.6,1.0	-0.747
ENSG00000183527	PSMG1	21	-	40551849	40551912	40549360	40549497	40552210	40552362	2,3,1	4,9,10	1,5,5	0,0,1	112	86	0.000555764	0.00902386	0.277,0.204,0.071	1.0,1.0,0.793	-0.747
ENSG00000241058	NSUN6	10	-	18931404	18931484	18905112	18905222	18937418	18937574	1,1,0	2,6,2	6,6,6	1,0,1	146	86	0.00121093	0.0180968	0.228,0.089,0.0	0.779,1.0,0.779	-0.747
ENSG00000139350	NEDD1	12	+	97311398	97311515	97301381	97301634	97313762	97313903	11,15,9	25,18,28	36,30,34	0,0,3	172	86	0	0	0.18,0.294,0.138	1.0,1.0,0.85	-0.746
ENSG00000135046	ANXA1	9	+	75778391	75778448	75777697	75777777	75780031	75780125	54,68,51	229229209	30,31,35	1,2,4	87	73	0	0	0.165,0.199,0.17	0.962,0.929,0.88	-0.746
ENSG00000002834	LASP1	17	+	37071295	37071399	37070577	37070728	37074857	37075579	25,26,22	295289252	44,35,39	5,4,7	172	86	0	0	0.041,0.043,0.042	0.815,0.814,0.736	-0.746
ENSG00000154710	RABGEF1	7	+	66260497	66260579	66248661	66248828	66262360	66262493	2,4,2	9,10,22	5,8,5	2,0,0	150	86	1.27649e-05	0.000298754	0.113,0.187,0.05	0.589,1.0,1.0	-0.746
ENSG00000125107	CNOT1	16	-	58621683	58621782	58621248	58621317	58622702	58622810	1,1,3	39,51,33	2,1,4	0,1,0	148	62	1.59931e-05	0.000367064	0.011,0.008,0.037	1.0,0.295,1.0	-0.746
ENSG00000173020	ADRBK1	11	+	67048563	67048655	67048202	67048254	67048929	67049029	3,0,0	9,4,6	6,7,11	0,2,1	129	45	3.48945e-05	0.00074664	0.104,0.0,0.0	1.0,0.55,0.793	-0.746
ENSG00000111011	RSRC2	12	-	123005050	123005128	123003386	123003598	123005931	123005975	1,2,1	40,36,27	2,1,2	0,1,0	93	37	7.47251e-05	0.0014934	0.01,0.022,0.015	1.0,0.285,1.0	-0.746
ENSG00000109674	NEIL3	4	+	178272533	178272703	178257261	178257475	178274461	178274882	1,0,3	3,10,4	64,61,59	8,4,1	172	86	1.75363e-10	8.14876e-09	0.143,0.0,0.273	0.8,0.884,0.967	-0.745
ENSG00000162961	DPY30	2	-	32117060	32117203	32092877	32093561	32168370	32168452	7,2,6	41,53,42	6,7,4	1,0,1	161	75	2.28626e-10	1.04714e-08	0.074,0.017,0.062	0.736,1.0,0.651	-0.745
ENSG00000101333	PLCB4	20	+	9076933	9076989	9049409	9049550	9288446	9288545	4,3,4	51,45,32	7,3,5	1,0,3	98	86	3.92739e-08	1.36226e-06	0.064,0.055,0.099	0.86,1.0,0.594	-0.745
ENSG00000173692	PSMD1	2	+	231951830	231951895	231949732	231949828	232003449	232003784	7,5,3	34,34,34	11,3,11	0,2,0	116	86	7.68863e-08	2.55647e-06	0.132,0.098,0.061	1.0,0.527,1.0	-0.745
ENSG00000205250	E2F4	16	+	67228300	67228362	67226663	67226773	67228588	67228883	3,3,13	18,38,22	7,10,6	0,3,0	110	86	4.36348e-07	1.30703e-05	0.115,0.058,0.316	1.0,0.723,1.0	-0.745
ENSG00000181555	SETD2	3	-	47142947	47143045	47139444	47139571	47155365	47155494	11,13,12	36,34,37	8,3,8	0,0,2	172	86	1.75582e-06	4.75376e-05	0.133,0.16,0.14	1.0,1.0,0.667	-0.745
ENSG00000119414	PPP6C	9	-	127915811	127916021	127908852	127912200	127916184	127916264	4,4,7	19,21,15	7,4,6	0,0,2	159	73	2.05284e-05	0.000459465	0.088,0.08,0.176	1.0,1.0,0.579	-0.745
ENSG00000183751	TBL3	16	+	2024056	2024108	2022037	2022206	2024197	2024293	2,5,2	12,12,12	3,4,4	0,0,1	90	86	0.000128977	0.00244125	0.137,0.285,0.137	1.0,1.0,0.793	-0.745
ENSG00000149639	SOGA1	20	-	35441106	35441247	35438384	35438510	35443528	35444710	4,2,4	10,27,30	2,1,3	1,0,0	172	86	0.000411578	0.00690986	0.167,0.036,0.063	0.5,1.0,1.0	-0.745
ENSG00000171681	ATF7IP	12	+	14610140	14610229	14609494	14609568	14613428	14614067	1,2,6	10,10,10	3,4,4	1,0,0	145	67	0.000657734	0.0104867	0.044,0.085,0.217	0.581,1.0,1.0	-0.745
ENSG00000157110	RBPMS	8	+	30407016	30407102	30402010	30402141	30416403	30416473	5,12,5	16,19,29	36,35,28	3,0,3	135	63	0	0	0.127,0.228,0.074	0.848,1.0,0.813	-0.744
ENSG00000128591	FLNC	7	+	128494828	128494966	128494466	128494736	128495252	128495368	19,35,30	51,50,35	66,72,66	0,2,0	172	86	0	0	0.157,0.259,0.3	1.0,0.947,1.0	-0.744
ENSG00000144233	AMMECR1L	2	-	128641776	128641886	128631401	128631846	128643383	128643496	19,22,25	56,49,45	70,66,59	3,0,5	172	86	0	0	0.145,0.183,0.217	0.921,1.0,0.855	-0.744
ENSG00000196924	FLNA	X	-	153586812	153586936	153586566	153586723	153587351	153587522	67,56,41	86,94,80	90,70,79	0,1,1	172	86	0	0	0.28,0.23,0.204	1.0,0.972,0.975	-0.744
ENSG00000127328	RAB3IP	12	+	70178499	70178595	70149163	70149439	70188216	70188294	4,8,2	50,44,37	13,5,10	1,1,1	157	71	1.11022e-16	9.06291e-15	0.035,0.076,0.024	0.855,0.693,0.819	-0.744
ENSG00000186184	POLR1D	13	+	28222515	28222590	28196022	28196146	28239822	28241548	8,8,9	77,79,71	14,5,10	2,2,0	136	86	3.4206e-13	2.10283e-11	0.062,0.06,0.074	0.816,0.613,1.0	-0.744
ENSG00000175029	CTBP2	10	-	126681263	126681381	126677793	126678267	126681770	126681898	10,8,5	27,19,8	6,9,8	0,0,1	172	86	2.10477e-07	6.56194e-06	0.156,0.174,0.238	1.0,1.0,0.8	-0.744
ENSG00000090615	GOLGA3	12	-	133353543	133353676	133353219	133353342	133354251	133354391	7,2,3	22,18,12	5,4,9	1,0,1	172	86	4.46659e-07	1.33663e-05	0.137,0.053,0.111	0.714,1.0,0.818	-0.744
ENSG00000070778	PTPN21	14	-	88967126	88967215	88963546	88963634	88967624	88967712	1,12,5	14,44,29	1,8,8	0,1,2	154	76	5.06712e-07	1.50261e-05	0.034,0.119,0.078	1.0,0.798,0.664	-0.744
ENSG00000162885	B3GALNT2	1	-	235634163	235634274	235618870	235618996	235643369	235643465	6,6,8	27,26,29	5,9,4	2,0,0	172	86	5.83431e-06	0.000144913	0.1,0.103,0.121	0.556,1.0,1.0	-0.744
ENSG00000138386	NAB1	2	+	191548463	191548553	191535051	191535185	191550201	191550364	3,14,6	27,28,24	3,5,8	1,0,0	166	86	9.12782e-06	0.000219237	0.054,0.206,0.115	0.608,1.0,1.0	-0.744
ENSG00000151693	ASAP2	2	+	9467954	9468040	9463249	9463379	9474866	9474942	3,6,5	11,11,14	5,5,4	1,0,0	141	69	9.39087e-05	0.0018338	0.118,0.211,0.149	0.71,1.0,1.0	-0.744
ENSG00000164975	SNAPC3	9	+	15423906	15423984	15422876	15423191	15433549	15433822	2,1,4	15,13,10	4,5,2	0,0,1	142	86	0.000179254	0.00328644	0.075,0.045,0.195	1.0,1.0,0.548	-0.744
ENSG00000089351	GRAMD1A	19	+	35514330	35514451	35514139	35514247	35516952	35517373	5,4,2	17,17,10	3,4,5	0,0,2	172	86	0.000281708	0.00492892	0.128,0.105,0.091	1.0,1.0,0.556	-0.744
ENSG00000108588	CCDC47	17	-	61850136	61850223	61843271	61843554	61850771	61850930	0,1,0	3,2,4	10,17,11	0,4,2	160	86	0.000402211	0.00677049	0.0,0.212,0.0	1.0,0.696,0.747	-0.744
ENSG00000135953	MFSD9	2	-	103343303	103343433	103340158	103340368	103347483	103347527	0,0,0	13,13,16	1,3,2	0,3,0	123	37	0.000447129	0.00743749	0.0,0.0,0.0	1.0,0.231,1.0	-0.744
ENSG00000070010	UFD1L	22	-	19459209	19459331	19445593	19445662	19466605	19466667	128127109	115,114,87	54,70,57	1,0,0	117	31	0	0	0.228,0.228,0.249	0.935,1.0,1.0	-0.743
ENSG00000143228	NUF2	1	+	163315467	163315608	163313522	163313660	163317552	163317728	3,3,4	97,77,83	15,15,9	1,3,2	172	86	0	0	0.015,0.019,0.024	0.882,0.714,0.692	-0.743
ENSG00000111799	COL12A1	6	-	75848163	75848296	75847152	75847295	75848537	75848677	33,18,25	43,43,40	22,14,24	1,0,0	172	86	1.11022e-16	9.06291e-15	0.277,0.173,0.238	0.917,1.0,1.0	-0.743
ENSG00000197256	KANK2	19	-	11286577	11286665	11285148	11285368	11287253	11287493	2,5,2	12,9,19	3,12,10	0,1,2	162	86	3.52408e-07	1.06793e-05	0.081,0.228,0.053	1.0,0.864,0.726	-0.743
ENSG00000157800	SLC37A3	7	-	140064207	140064291	140058439	140058585	140069389	140069482	2,2,5	7,10,6	7,13,10	0,2,0	154	86	5.88332e-06	0.000145926	0.138,0.1,0.318	1.0,0.784,1.0	-0.743
ENSG00000104517	UBR5	8	-	103311679	103311775	103311075	103311199	103312227	103312379	3,8,2	20,10,11	8,5,4	0,0,1	172	86	3.21024e-05	0.000693092	0.07,0.286,0.083	1.0,1.0,0.667	-0.743
ENSG00000172845	SP3	2	-	174829132	174829281	174819600	174820960	174829892	174830430	0,3,0	14,13,19	2,3,3	0,0,3	172	86	0.000567017	0.00918382	0.0,0.103,0.0	1.0,1.0,0.333	-0.743
ENSG00000182934	SRPR	11	-	126137897	126137981	126137069	126137230	126138582	126138854	1,1,3	8,17,9	2,5,4	0,3,0	154	86	0.000731815	0.0115246	0.065,0.032,0.157	1.0,0.482,1.0	-0.743
ENSG00000163930	BAP1	3	-	52439125	52439310	52438468	52438602	52439780	52439928	4,7,0	6,15,5	4,4,4	0,1,0	172	86	0.00175229	0.0250936	0.25,0.189,0.0	1.0,0.667,1.0	-0.743
ENSG00000116095	PLEKHA3	2	+	179353694	179353741	179350367	179350484	179355385	179355541	1,1,0	2,3,1	9,5,8	0,1,0	80	86	0.00216505	0.0301716	0.35,0.264,0.0	1.0,0.843,1.0	-0.743
ENSG00000148481	FAM188A	10	-	15889862	15889942	15838098	15838171	15902204	15902519	0,2,0	8,8,8	3,3,2	0,0,2	126	66	0.00309417	0.0413513	0.0,0.116,0.0	1.0,1.0,0.344	-0.743
ENSG00000132604	TERF2	16	-	69391420	69391464	69389463	69390959	69395306	69395392	4,3,7	15,11,20	49,58,46	0,0,0	67	79	0	0	0.239,0.243,0.292	1.0,1.0,1.0	-0.742
ENSG00000011485	PPP5C	19	+	46886667	46886733	46879709	46879831	46887036	46887135	1,13,7	51,37,47	33,28,23	4,4,3	118	86	0	0	0.014,0.204,0.098	0.857,0.836,0.848	-0.742
ENSG00000112531	QKI	6	+	163956013	163956157	163899811	163899928	163983013	163983101	20,13,10	71,65,60	33,31,29	3,0,7	167	81	0	0	0.12,0.088,0.075	0.842,1.0,0.668	-0.742
ENSG00000133612	AGAP3	7	+	150814722	150814864	150783981	150784159	150815296	150815431	11,16,6	32,20,23	14,20,18	1,0,1	172	86	2.56906e-13	1.60551e-11	0.147,0.286,0.115	0.875,1.0,0.9	-0.742
ENSG00000155463	OXA1L	14	+	23237166	23237380	23235896	23235973	23238999	23239143	10,15,15	40,26,31	15,13,11	0,0,2	156	70	7.70905e-10	3.31268e-08	0.101,0.206,0.178	1.0,1.0,0.712	-0.742
ENSG00000119285	HEATR1	1	-	236761177	236761279	236760135	236760276	236767253	236767427	10,7,10	19,22,23	8,6,8	0,1,0	172	86	3.84224e-07	1.15873e-05	0.208,0.137,0.179	1.0,0.75,1.0	-0.742
ENSG00000132361	KIAA0664	17	-	2597773	2597858	2597416	2597570	2598150	2598395	2,3,6	10,11,11	13,9,4	0,0,1	156	86	2.61236e-06	6.86382e-05	0.099,0.131,0.231	1.0,1.0,0.688	-0.742
ENSG00000138297	TIMM23	10	-	51613217	51613311	51606987	51607098	51623108	51623328	29,27,33	115,99,99	4,6,3	0,0,1	172	86	5.08787e-06	0.000127826	0.112,0.12,0.143	1.0,1.0,0.6	-0.742
ENSG00000146433	TMEM181	6	+	159004985	159005076	159001971	159002027	159006335	159006457	1,0,1	10,5,13	6,4,4	1,0,1	131	49	6.51578e-06	0.000160621	0.036,0.0,0.028	0.692,1.0,0.599	-0.742
ENSG00000163870	TPRA1	3	-	127294782	127294893	127294027	127294108	127295459	127295539	10,3,2	34,20,13	16,8,3	0,4,0	147	61	1.27482e-05	0.000298419	0.109,0.059,0.06	1.0,0.454,1.0	-0.742
ENSG00000138095	LRPPRC	2	-	44174869	44174914	44174395	44174509	44175260	44175338	3,6,4	30,23,29	5,3,2	0,0,1	61	71	1.6235e-05	0.000371793	0.104,0.233,0.138	1.0,1.0,0.7	-0.742
ENSG00000100596	SPTLC2	14	-	78028738	78028832	78023383	78023489	78036726	78036851	2,2,3	27,37,31	5,3,4	0,0,4	172	86	3.8538e-05	0.000816043	0.036,0.026,0.046	1.0,1.0,0.333	-0.742
ENSG00000125124	BBS2	16	-	56545070	56545196	56544770	56544833	56548364	56548592	0,0,2	7,8,8	6,2,4	1,0,1	142	56	6.73798e-05	0.0013597	0.0,0.0,0.09	0.703,1.0,0.612	-0.742
ENSG00000142156	COL6A1	21	+	47420244	47420281	47419570	47419606	47421166	47421300	1,1,2	18,25,9	2,1,2	0,1,0	30	29	0.000936001	0.0143953	0.051,0.037,0.177	1.0,0.492,1.0	-0.742
ENSG00000117632	STMN1	1	-	26231154	26231229	26230131	26230304	26232879	26232957	19,21,18	32,45,40	33,30,41	2,0,0	121	71	0	0	0.258,0.215,0.209	0.906,1.0,1.0	-0.741
ENSG00000175455	CCDC14	3	-	123675586	123675642	123667742	123667979	123679990	123680255	4,0,0	69,67,68	10,9,6	3,1,3	98	86	0	0	0.048,0.0,0.0	0.745,0.888,0.637	-0.741
ENSG00000126464	PRR12	19	+	50118132	50118266	50117789	50117906	50119003	50119476	27,31,37	70,56,32	199174192	0,3,0	172	86	0	0	0.162,0.217,0.366	1.0,0.967,1.0	-0.741
ENSG00000234545	FAM133B	7	-	92195327	92195375	92191595	92191682	92199136	92199229	5,5,6	148150136	7,12,9	4,1,3	76	80	0	0	0.034,0.034,0.044	0.648,0.927,0.759	-0.741
ENSG00000134057	CCNB1	5	+	68473065	68473176	68471223	68471364	68473350	68474072	12,4,6	254276248	32,20,30	2,6,5	172	86	0	0	0.023,0.007,0.012	0.889,0.625,0.75	-0.741
ENSG00000089159	PXN	12	-	120661520	120661636	120660665	120660802	120661953	120662180	13,20,13	51,63,39	32,21,19	0,1,4	172	86	1.11022e-16	9.06291e-15	0.113,0.137,0.143	1.0,0.913,0.704	-0.741
ENSG00000167986	DDB1	11	-	61076454	61076549	61071336	61071507	61079255	61079367	9,16,18	45,35,33	10,12,14	2,0,0	172	86	8.36271e-10	3.57383e-08	0.091,0.186,0.214	0.714,1.0,1.0	-0.741
ENSG00000258984	RP11-526L8.1	2	+	238925207	238925275	238881733	238881867	238944518	238944581	5,3,9	15,21,12	7,6,10	0,1,0	92	56	6.17681e-07	1.80545e-05	0.169,0.08,0.313	1.0,0.785,1.0	-0.741
ENSG00000090863	GLG1	16	-	74495991	74496093	74493579	74493687	74497253	74497377	6,7,5	15,21,9	6,5,5	1,0,0	172	86	1.45645e-05	0.000337258	0.167,0.143,0.217	0.75,1.0,1.0	-0.741
ENSG00000136436	CALCOCO2	17	+	46919059	46919249	46908349	46908440	46925425	46925528	1,2,1	10,12,7	4,6,2	1,1,0	170	84	4.68368e-05	0.000975184	0.047,0.076,0.066	0.664,0.748,1.0	-0.741
ENSG00000130177	CDC16	13	+	115008731	115008823	115007595	115007755	115009330	115009464	0,1,4	4,5,4	11,7,8	1,0,1	170	86	0.000282236	0.00493676	0.0,0.092,0.336	0.848,1.0,0.802	-0.741
ENSG00000011243	AKAP8L	19	-	15514285	15514526	15511960	15512414	15521330	15521405	7,8,9	23,20,23	4,4,1	0,1,0	154	68	0.000463941	0.00768633	0.118,0.15,0.147	1.0,0.638,1.0	-0.741
ENSG00000115274	INO80B	2	+	74682944	74683077	74682618	74682725	74683229	74683399	0,1,2	21,9,17	2,3,1	0,0,1	172	86	0.000978892	0.014965	0.0,0.053,0.056	1.0,1.0,0.333	-0.741
ENSG00000164924	YWHAZ	8	-	101960823	101961128	101937143	101937267	101964156	101964353	74123109	213190180	75,70,67	2,4,0	172	86	0	0	0.148,0.245,0.232	0.949,0.897,1.0	-0.74
ENSG00000160953	MUM1	19	+	1373070	1373159	1370640	1371077	1376517	1377093	4,0,1	37,43,35	12,11,7	2,2,1	164	86	0	0	0.054,0.0,0.015	0.759,0.743,0.786	-0.74
ENSG00000155100	OTUD6B	8	+	92086058	92086139	92083365	92083517	92090583	92090896	1,0,1	84,82,58	4,4,5	2,1,0	148	86	2.25486e-13	1.41412e-11	0.007,0.0,0.01	0.537,0.699,1.0	-0.74
ENSG00000153993	SEMA3D	7	-	84697506	84697600	84694739	84694868	84751056	84751251	8,4,6	8,18,13	21,15,21	2,0,0	172	86	2.94811e-10	1.32876e-08	0.333,0.1,0.188	0.84,1.0,1.0	-0.74
ENSG00000162819	BROX	1	+	222902961	222903043	222902084	222902170	222903368	222903519	7,2,2	27,11,22	7,3,4	1,0,1	143	79	1.39574e-06	3.83391e-05	0.125,0.091,0.048	0.795,1.0,0.688	-0.74
ENSG00000133612	AGAP3	7	+	150813879	150813938	150783828	150784159	150815296	150815365	3,5,2	32,20,23	4,2,4	1,0,1	80	62	3.68449e-06	9.49441e-05	0.068,0.162,0.063	0.756,1.0,0.756	-0.74
ENSG00000115207	GTF3C2	2	-	27559064	27559292	27558464	27558573	27560110	27560209	10,4,8	19,17,18	3,9,5	0,0,1	172	86	1.34379e-05	0.000313094	0.208,0.105,0.182	1.0,1.0,0.714	-0.74
ENSG00000198315	ZNF192	6	+	28120038	28120162	28119622	28119714	28120833	28120857	1,0,1	16,6,17	1,2,2	0,0,1	102	16	0.000429397	0.00717803	0.01,0.0,0.009	1.0,1.0,0.239	-0.74
ENSG00000025800	KPNA6	1	+	32625000	32625132	32623867	32623962	32631705	32631831	4,9,4	20,37,23	2,1,3	1,0,0	172	86	0.000947709	0.0145473	0.091,0.108,0.08	0.5,1.0,1.0	-0.74
ENSG00000096746	HNRNPH3	10	+	70098896	70098983	70098259	70098399	70099196	70099312	32,25,41	63,71,38	58,40,51	0,1,0	160	86	0	0	0.214,0.159,0.367	1.0,0.956,1.0	-0.739
ENSG00000101577	LPIN2	18	-	2928588	2928658	2927719	2927809	2929062	2929156	2,3,9	14,11,11	79,66,103	5,2,4	123	83	0	0	0.088,0.155,0.356	0.914,0.957,0.946	-0.739
ENSG00000073578	SDHA	5	+	235258	235454	233591	233760	236542	236714	1,8,4	22,14,21	15,20,24	3,2,0	172	86	3.82205e-12	2.10345e-10	0.022,0.222,0.087	0.714,0.833,1.0	-0.739
ENSG00000198522	GPN1	2	+	27864106	27864146	27862909	27862992	27865295	27865386	1,2,2	17,14,29	13,5,13	1,3,2	54	74	6.13436e-11	2.96911e-09	0.075,0.164,0.086	0.947,0.695,0.899	-0.739
ENSG00000068489	PRR11	17	+	57262800	57262923	57262414	57262565	57270852	57271095	12,3,6	20,20,26	17,14,16	1,0,3	172	86	6.92869e-11	3.34188e-09	0.231,0.07,0.103	0.895,1.0,0.727	-0.739
ENSG00000198856	OSTC	4	+	109584388	109584462	109571802	109571950	109588402	109588551	0,2,2	12,23,12	9,4,6	1,1,1	134	86	1.673e-09	6.89403e-08	0.0,0.053,0.097	0.852,0.72,0.794	-0.739
ENSG00000033011	ALG1	16	+	5127907	5128018	5127445	5127535	5128757	5128879	4,11,6	9,18,17	9,7,13	0,1,0	169	83	1.32113e-07	4.22681e-06	0.179,0.231,0.148	1.0,0.775,1.0	-0.739
ENSG00000114346	ECT2	3	+	172502496	172502593	172501588	172501699	172504282	172504364	4,4,4	10,7,14	5,11,8	1,0,0	161	75	4.6075e-06	0.0001167	0.157,0.21,0.117	0.7,1.0,1.0	-0.739
ENSG00000100441	KHNYN	14	+	24902141	24902238	24901999	24902058	24905277	24905385	1,3,5	5,3,7	5,9,11	0,1,0	138	52	0.000221391	0.00397069	0.07,0.274,0.212	1.0,0.772,1.0	-0.739
ENSG00000163605	PPP4R2	3	+	73112823	73112898	73110173	73110211	73113153	73113297	0,2,0	22,12,18	2,2,1	0,0,1	81	31	0.000503728	0.00826739	0.0,0.06,0.0	1.0,1.0,0.277	-0.739
ENSG00000111725	PRKAB1	12	+	120114341	120114475	120110105	120110269	120117737	120117806	7,3,7	27,26,28	2,1,3	1,0,0	148	62	0.000909859	0.0140286	0.098,0.046,0.095	0.456,1.0,1.0	-0.739
ENSG00000101161	PRPF6	20	+	62659830	62659922	62658955	62659089	62660729	62660844	35,32,43	124103108	18,28,17	1,0,3	170	86	0	0	0.125,0.136,0.168	0.901,1.0,0.741	-0.738
ENSG00000149554	CHEK1	11	+	125507343	125507439	125505323	125505428	125513686	125513795	10,10,7	27,22,26	16,14,16	2,1,0	172	86	6.56919e-13	3.90724e-11	0.156,0.185,0.119	0.8,0.875,1.0	-0.738
ENSG00000171475	WIPF2	17	+	38418776	38418893	38412642	38412774	38430041	38430251	2,4,6	19,27,15	2,5,5	1,0,0	172	86	5.66392e-05	0.00115988	0.05,0.069,0.167	0.5,1.0,1.0	-0.738
ENSG00000152556	PFKM	12	+	48524145	48524219	48516549	48516642	48525098	48525176	1,4,2	9,15,8	6,8,4	0,0,2	119	71	7.06608e-05	0.00142038	0.062,0.137,0.13	1.0,1.0,0.544	-0.738
ENSG00000020922	MRE11A	11	-	94209454	94209569	94204739	94204925	94211900	94212042	1,3,0	17,15,19	3,3,6	0,3,0	172	86	0.000145797	0.00272932	0.029,0.091,0.0	1.0,0.333,1.0	-0.738
ENSG00000241973	PI4KA	22	-	21153958	21154054	21153227	21153564	21156260	21156306	6,10,2	10,13,14	5,6,3	1,0,0	125	39	0.000358712	0.00611633	0.158,0.194,0.043	0.609,1.0,1.0	-0.738
ENSG00000105287	PRKD2	19	-	47204291	47204369	47204055	47204209	47207425	47207648	3,1,0	13,15,7	6,2,1	0,0,1	142	86	0.00133714	0.0197483	0.123,0.039,0.0	1.0,1.0,0.377	-0.738
ENSG00000166266	CUL5	11	+	107940822	107940916	107925601	107925682	107943058	107943189	5,6,2	7,10,10	2,2,7	0,0,1	160	74	0.00154171	0.0223923	0.248,0.217,0.085	1.0,1.0,0.764	-0.738
ENSG00000112877	CEP72	5	+	624585	624694	620183	620376	633883	634062	1,4,4	16,18,6	52,71,60	4,8,3	172	86	0	0	0.03,0.1,0.25	0.867,0.816,0.909	-0.737
ENSG00000144381	HSPD1	2	-	198354920	198355020	198353776	198353971	198358047	198358216	48,60,52	101157106	79,64,59	4,1,4	172	86	0	0	0.192,0.16,0.197	0.908,0.97,0.881	-0.737
ENSG00000196313	POM121	7	+	72409128	72409220	72400477	72400649	72409874	72409948	2,6,2	120111102	12,8,10	0,1,5	151	67	5.55112e-16	4.31905e-14	0.007,0.023,0.009	1.0,0.78,0.47	-0.737
ENSG00000173692	PSMD1	2	+	231927219	231927389	231926961	231927035	231931619	231931825	25,19,16	28,30,27	25,15,25	0,0,1	153	67	2.22045e-15	1.65322e-13	0.281,0.217,0.206	1.0,1.0,0.916	-0.737
ENSG00000104517	UBR5	8	-	103307209	103307339	103306182	103306343	103307431	103307558	6,1,5	8,20,25	2,3,3	0,1,0	172	86	0.000489906	0.00806818	0.273,0.024,0.091	1.0,0.6,1.0	-0.737
ENSG00000175198	PCCA	13	+	100914982	100915085	100861585	100861717	100920942	100921037	1,3,4	9,6,5	6,3,5	1,0,0	172	86	0.000707988	0.0111976	0.053,0.2,0.286	0.75,1.0,1.0	-0.737
ENSG00000137547	MRPL15	8	+	55049827	55049993	55049070	55049225	55055222	55055346	9,13,11	61,60,49	19,22,24	3,1,3	172	86	0	0	0.069,0.098,0.101	0.76,0.917,0.8	-0.736
ENSG00000166025	AMOTL1	11	+	94528176	94528326	94501507	94501726	94554695	94554987	29,23,24	40,51,33	73,51,54	0,1,1	172	86	0	0	0.266,0.184,0.267	1.0,0.962,0.964	-0.736
ENSG00000101333	PLCB4	20	+	9319540	9319684	9288446	9288545	9343542	9343622	8,6,5	84,58,58	11,6,7	1,1,1	159	73	0	0	0.042,0.045,0.038	0.835,0.734,0.763	-0.736
ENSG00000204713	TRIM27	6	-	28879472	28879495	28872330	28872442	28887788	28888019	11,18,21	161157150	6,5,10	1,1,0	32	86	9.99201e-16	7.6312e-14	0.155,0.236,0.273	0.942,0.931,1.0	-0.736
ENSG00000166002	C11orf75	11	-	93232441	93232514	93212106	93212435	93276441	93276674	3,6,6	14,15,20	24,19,21	3,2,0	132	86	5.02931e-14	3.35885e-12	0.123,0.207,0.163	0.839,0.861,1.0	-0.736
ENSG00000131100	ATP6V1E1	22	-	18083857	18083947	18082792	18082861	18095577	18095644	13,19,13	35,45,37	8,16,14	1,0,1	116	36	1.70535e-11	8.75805e-10	0.103,0.116,0.098	0.713,1.0,0.813	-0.736
ENSG00000148834	GSTO1	10	+	106025841	106025948	106022736	106022835	106027009	106027217	15,10,7	22,16,14	13,18,5	0,1,0	172	86	3.40543e-09	1.3527e-07	0.254,0.238,0.2	1.0,0.9,1.0	-0.736
ENSG00000149294	NCAM1	11	+	113073100	113073175	112832089	112832386	113075007	113075226	4,3,11	15,10,11	15,14,16	0,1,0	136	86	4.48813e-09	1.75864e-07	0.144,0.159,0.387	1.0,0.899,1.0	-0.736
ENSG00000136699	SMPD4	2	-	130914157	130914248	130913607	130913708	130921946	130922018	7,7,4	9,14,20	6,5,2	1,0,0	147	65	0.000162891	0.0030207	0.256,0.181,0.081	0.726,1.0,1.0	-0.736
ENSG00000073614	KDM5A	12	-	432247	432372	431582	431733	432765	432947	1,3,3	16,7,16	2,2,6	0,1,0	172	86	0.000335931	0.0057674	0.03,0.176,0.086	1.0,0.5,1.0	-0.736
ENSG00000237649	KIFC1	6	+	33371261	33371312	33366064	33366164	33371505	33371906	1,1,2	5,10,3	6,1,7	1,0,0	88	86	0.000370653	0.00629957	0.163,0.089,0.394	0.854,1.0,1.0	-0.736
ENSG00000170525	PFKFB3	10	+	6263603	6263708	6263343	6263490	6264817	6264947	1,2,3	30,31,18	1,4,1	1,0,0	172	86	0.000371356	0.00630859	0.016,0.031,0.077	0.333,1.0,1.0	-0.736
ENSG00000138674	SEC31A	4	-	83803010	83803093	83801951	83802075	83812240	83812306	6,22,10	129,124,77	19,12,17	2,3,1	125	59	0	0	0.021,0.077,0.058	0.818,0.654,0.889	-0.735
ENSG00000063177	RPL18	19	-	49119982	49120081	49119335	49119459	49120572	49120680	206190144	299288253	170175170	2,0,4	172	86	0	0	0.256,0.248,0.222	0.977,1.0,0.955	-0.735
ENSG00000198910	L1CAM	X	-	153133254	153133365	153132810	153133008	153133452	153133577	12,7,3	42,44,49	21,16,20	4,2,1	172	86	0	0	0.125,0.074,0.03	0.724,0.8,0.909	-0.735
ENSG00000005100	DHX33	17	-	5366848	5367009	5365638	5365866	5371890	5372181	2,0,7	63,49,40	80,81,97	21,11,8	172	86	0	0	0.016,0.0,0.08	0.656,0.786,0.858	-0.735
ENSG00000141367	CLTC	17	+	57759631	57759789	57759007	57759200	57759989	57760154	19,11,21	54,37,35	15,31,24	3,0,0	172	86	5.9508e-14	3.94674e-12	0.15,0.129,0.231	0.714,1.0,1.0	-0.735
ENSG00000099942	CRKL	22	+	21288066	21288532	21271713	21272533	21303998	21308037	4,6,7	53,46,42	12,5,7	4,0,1	172	86	3.38771e-10	1.51158e-08	0.036,0.061,0.077	0.6,1.0,0.778	-0.735
ENSG00000009844	VTA1	6	+	142487364	142487459	142468366	142468536	142490686	142490814	12,11,5	43,41,26	5,6,9	1,0,1	172	86	1.11535e-08	4.16336e-07	0.122,0.118,0.088	0.714,1.0,0.818	-0.735
ENSG00000167778	SPRYD3	12	-	53469519	53469595	53461938	53462088	53470898	53471045	2,5,4	7,16,4	15,8,10	1,0,0	138	86	3.76519e-07	1.13684e-05	0.151,0.163,0.384	0.903,1.0,1.0	-0.735
ENSG00000105402	NAPA	19	-	47996375	47996431	47995271	47995376	47996672	47996750	2,1,0	10,16,15	7,3,5	0,1,2	83	71	1.50411e-06	4.11615e-05	0.146,0.051,0.0	1.0,0.72,0.681	-0.735
ENSG00000114209	PDCD10	3	-	167422629	167422683	167414796	167414914	167437849	167438061	13,15,8	47,42,36	6,1,5	0,0,1	94	86	4.9861e-06	0.000125497	0.202,0.246,0.169	1.0,1.0,0.821	-0.735
ENSG00000100034	PPM1F	22	-	22300214	22300480	22293903	22294052	22307163	22307209	3,2,0	2,3,5	20,16,15	1,1,0	125	39	4.38681e-05	0.00091906	0.319,0.172,0.0	0.862,0.833,1.0	-0.735
ENSG00000167202	TBC1D2B	15	-	78301338	78301456	78295646	78295832	78305164	78305659	1,7,3	25,24,18	3,2,3	2,0,0	172	86	0.000550626	0.00895094	0.02,0.127,0.077	0.429,1.0,1.0	-0.735
ENSG00000101596	SMCHD1	18	+	2674013	2674144	2673279	2673362	2688391	2688506	0,2,0	4,7,5	6,3,4	1,1,0	162	76	0.00058205	0.00940771	0.0,0.118,0.0	0.738,0.585,1.0	-0.735
ENSG00000115239	ASB3	2	-	53955848	53955984	53943702	53943880	53956594	53956707	3,2,2	5,10,3	7,3,4	1,0,0	172	86	0.000671549	0.010685	0.231,0.091,0.25	0.778,1.0,1.0	-0.735
ENSG00000113716	HMGXB3	5	+	149416198	149416500	149412016	149412166	149420310	149420442	7,7,2	10,14,6	24,34,40	0,2,2	172	86	3.36953e-13	2.07246e-11	0.259,0.2,0.143	1.0,0.895,0.909	-0.734
ENSG00000070814	TCOF1	5	+	149767464	149767651	149759094	149759295	149769449	149769586	7,5,5	18,33,16	10,12,8	2,1,0	172	86	1.31124e-09	5.48502e-08	0.163,0.07,0.135	0.714,0.857,1.0	-0.734
ENSG00000143222	UFC1	1	+	161127043	161127107	161126739	161126807	161127406	161127483	10,4,2	29,17,30	7,8,4	0,1,1	73	45	4.91331e-08	1.68128e-06	0.175,0.127,0.039	1.0,0.831,0.711	-0.734
ENSG00000115677	HDLBP	2	-	242192371	242192450	242189255	242189395	242192807	242192912	26,34,26	40,59,53	43,46,40	1,0,0	144	86	0	0	0.28,0.256,0.227	0.963,1.0,1.0	-0.733
ENSG00000196262	PPIA	7	+	44838990	44839473	44837571	44838876	44840885	44841246	309300293	526511397	263319302	7,1,3	172	86	0	0	0.227,0.227,0.27	0.949,0.994,0.981	-0.733
ENSG00000204406	MBD5	2	+	148990813	148990964	148936268	148936362	149099782	149099905	12,25,17	33,46,55	38,12,27	1,2,0	172	86	0	0	0.154,0.214,0.134	0.95,0.75,1.0	-0.733
ENSG00000130985	UBA1	X	+	47065346	47065512	47062939	47063095	47065646	47065843	21,21,15	28,35,29	27,39,31	0,2,0	172	86	0	0	0.273,0.231,0.205	1.0,0.907,1.0	-0.733
ENSG00000146232	NFKBIE	6	-	44230296	44230399	44228187	44228276	44232718	44233500	4,5,0	4,5,7	19,24,23	0,2,0	168	82	7.90141e-07	2.27114e-05	0.328,0.328,0.0	1.0,0.854,1.0	-0.733
ENSG00000103222	ABCC1	16	+	16103632	16103758	16101672	16101849	16108347	16108485	2,3,2	7,11,13	8,5,5	1,0,1	172	86	4.88284e-06	0.00012304	0.125,0.12,0.071	0.8,1.0,0.714	-0.733
ENSG00000164985	PSIP1	9	-	15479588	15479685	15478474	15478550	15486003	15486066	5,4,4	3,10,6	15,7,11	1,0,0	125	39	2.26597e-05	0.000502559	0.342,0.111,0.172	0.824,1.0,1.0	-0.733
ENSG00000119772	DNMT3A	2	-	25464430	25464576	25463508	25463599	25466766	25466851	2,3,2	10,11,22	8,8,5	0,0,3	162	76	3.04812e-05	0.000660725	0.086,0.113,0.041	1.0,1.0,0.439	-0.733
ENSG00000143776	CDC42BPA	1	-	227300012	227300123	227288692	227288940	227307504	227307638	1,1,0	6,8,7	4,2,4	1,0,1	172	86	0.00035237	0.00602057	0.077,0.059,0.0	0.667,1.0,0.667	-0.733
ENSG00000118007	STAG1	3	-	136287606	136287703	136240054	136240259	136323150	136323315	2,1,4	10,7,12	4,2,3	2,0,0	172	86	0.00312878	0.0417645	0.091,0.067,0.143	0.5,1.0,1.0	-0.733
ENSG00000083312	TNPO1	5	+	72187636	72187723	72185612	72185784	72188965	72189052	14,13,16	51,43,54	8,7,17	1,1,0	154	80	2.00717e-12	1.13525e-10	0.125,0.136,0.133	0.806,0.784,1.0	-0.732
ENSG00000171720	HDAC3	5	-	141009610	141009692	141008739	141008873	141016114	141016197	2,0,5	21,26,6	7,6,8	1,1,0	140	76	9.49152e-08	3.10942e-06	0.049,0.0,0.311	0.792,0.765,1.0	-0.732
ENSG00000257184	RP1-170O19.20	7	-	27204496	27204586	27202925	27203460	27219264	27219632	11,18,5	22,23,20	6,8,13	0,1,0	166	86	1.76334e-07	5.55875e-06	0.206,0.288,0.115	1.0,0.806,1.0	-0.732
ENSG00000167595	C19orf55	19	+	36255934	36256077	36255754	36255837	36257668	36257856	0,0,2	5,2,8	12,3,14	1,1,1	162	76	1.46467e-05	0.000338973	0.0,0.0,0.105	0.849,0.585,0.868	-0.732
ENSG00000159899	NPR2	9	+	35806061	35806230	35805826	35805982	35806388	35806535	2,1,1	6,8,10	11,5,6	1,0,2	172	86	1.55328e-05	0.000357421	0.143,0.059,0.048	0.846,1.0,0.6	-0.732
ENSG00000186185	KIF18B	17	-	43012198	43012303	43011600	43011798	43012626	43012784	1,7,1	31,30,31	2,1,4	2,0,0	172	86	0.000333606	0.00573143	0.016,0.104,0.016	0.333,1.0,1.0	-0.732
ENSG00000196152	ZNF79	9	+	130190830	130190939	130186716	130187082	130191110	130191199	1,1,1	10,14,9	7,6,3	0,0,3	168	82	0.000516913	0.00845925	0.047,0.034,0.051	1.0,1.0,0.328	-0.732
ENSG00000145715	RASA1	5	+	86670656	86670733	86669979	86670137	86672209	86672382	2,0,1	9,5,2	7,5,2	0,0,1	140	86	0.00169044	0.0243226	0.12,0.0,0.235	1.0,1.0,0.551	-0.732
ENSG00000080824	HSP90AA1	14	-	102548447	102548781	102547385	102548158	102549882	102550030	49,54,54	74,101,79	78,74,75	4,0,0	172	86	0	0	0.249,0.211,0.255	0.907,1.0,1.0	-0.731
[truncated: 8,101 more rows]
