# Supplementary material
Source: HighWire-hosted journal article supplement (doi:10.1101/rna.065383.117)
Supplement: Supplemental_Table_S4_Hela_Spliceostatin_Differentially_splicing_events.xlsx [file Supplemental_Table_S4_Hela_Spliceostatin_Differentially_splicing_events.xlsx]

## Sheet: A3SS
GeneID	geneSymbol	chr	strand	longExonStart_0base	longExonEnd	shortES	shortEE	flankingES	flankingEE	IJC_SAMPLE_1	SJC_SAMPLE_1	IJC_SAMPLE_2	SJC_SAMPLE_2	IncFormLen	SkipFormLen	PValue	FDR	IncLevel1	IncLevel2	IncLevelDifference
ENSG00000108819	PPP1R9B	17	-	48217457	48217724	48217457	48217593	48218633	48218738	36,40,33	0,1,1	15,20,10	22,22,26	76	38	0	0	1.0,0.952,0.943	0.254,0.313,0.161	0.722
ENSG00000204628	GNB2L1	5	-	180663936	180664319	180663936	180664042	180664608	180664719	520569633	776853889	72,90,71	1020930814	76	38	0	0	0.251,0.25,0.263	0.034,0.046,0.042	0.214
ENSG00000076108	BAZ2A	12	-	57000030	57000179	57000030	57000096	57000416	57000517	14,20,13	7,12,13	3,3,2	45,79,58	76	38	0	0	0.5,0.455,0.333	0.032,0.019,0.017	0.407
ENSG00000197345	MRPL21	11	-	68663982	68664306	68663982	68664146	68665394	68665480	21,27,33	76,69,60	4,2,3	146163174	76	38	0	0	0.121,0.164,0.216	0.014,0.006,0.009	0.157
ENSG00000143621	ILF2	1	-	153640928	153641052	153640928	153641033	153642311	153642354	24,34,35	81,86,89	0,2,3	250215187	50	37	0	0	0.18,0.226,0.225	0.0,0.007,0.012	0.204
ENSG00000116809	ZBTB17	1	-	16272648	16272811	16272648	16272789	16273429	16273618	5,12,9	1,5,3	0,1,0	40,37,35	54	38	0	0	0.779,0.628,0.679	0.0,0.019,0.0	0.689
ENSG00000104522	TSTA3	8	-	144698275	144698610	144698275	144698390	144698736	144698893	115130150	40,40,36	4,22,20	56,83,57	76	38	0	0	0.59,0.619,0.676	0.034,0.117,0.149	0.528
ENSG00000124279	FASTKD3	5	-	7861695	7861886	7861695	7861765	7862935	7863110	15,19,27	1,2,3	14,16,13	60,44,47	76	38	0	0	0.882,0.826,0.818	0.104,0.154,0.121	0.716
ENSG00000111011	RSRC2	12	-	123003385	123003598	123003385	123003576	123005931	123005975	29,21,32	2,0,2	6,1,0	23,11,8	54	38	0	0	0.911,1.0,0.918	0.155,0.06,0.0	0.871
ENSG00000163930	BAP1	3	-	52436794	52436956	52436794	52436887	52437153	52437314	42,57,66	22,20,18	8,13,21	65,72,104	76	38	0	0	0.488,0.588,0.647	0.058,0.083,0.092	0.497
ENSG00000133112	TPT1	13	-	45911312	45911688	45911312	45911523	45912794	45912911	217247245	491447703	21,23,29	367463439	76	38	0	0	0.181,0.216,0.148	0.028,0.024,0.032	0.154
ENSG00000048162	NOP16	5	-	175813840	175813944	175813840	175813910	175815235	175815344	60,80,93	5,12,7	5,9,7	279276260	66	38	0	0	0.874,0.793,0.884	0.01,0.018,0.015	0.836
ENSG00000196531	NACA	12	-	57118235	57118333	57118235	57118307	57119046	57119083	71,50,45	42,36,39	8,17,11	49,65,61	51	31	0	0	0.507,0.458,0.412	0.09,0.137,0.099	0.35
ENSG00000100316	RPL3	22	-	39712710	39713026	39712710	39712846	39713465	39713634	129161224	739732928	19,27,20	986930812	76	38	0	0	0.08,0.099,0.108	0.01,0.014,0.012	0.084
ENSG00000183258	DDX41	5	-	176942186	176942340	176942186	176942259	176942685	176942822	189213204	55,54,50	21,36,41	84124106	76	38	0	0	0.632,0.664,0.671	0.111,0.127,0.162	0.522
ENSG00000183258	DDX41	5	-	176942186	176942362	176942186	176942259	176942685	176942822	189213204	55,54,50	23,35,41	84124106	76	38	0	0	0.632,0.664,0.671	0.12,0.124,0.162	0.52
ENSG00000183258	DDX41	5	-	176943288	176943517	176943288	176943448	176943725	176943836	71,93,94	18,19,27	9,13,13	49,54,52	76	38	0	0	0.664,0.71,0.635	0.084,0.107,0.111	0.569
ENSG00000131051	RBM39	20	-	34317383	34317473	34317383	34317449	34319862	34320057	130109103	10,15,12	65,48,32	226192163	56	38	0	0	0.898,0.831,0.853	0.163,0.145,0.118	0.719
ENSG00000131051	RBM39	20	-	34297145	34297196	34297145	34297178	34300940	34301018	39,37,35	0,3,3	28,67,42	107,83,80	39	27	0	0	1.0,0.895,0.89	0.153,0.359,0.267	0.669
ENSG00000131051	RBM39	20	-	34297145	34297231	34297145	34297178	34300940	34301018	98,94,88	0,3,3	31,44,26	107,83,80	65	27	0	0	1.0,0.929,0.924	0.107,0.18,0.119	0.816
ENSG00000131051	RBM39	20	-	34297145	34297231	34297145	34297196	34300940	34301018	67,56,54	2,0,2	17,18,12	15,43,28	67	38	0	0	0.95,1.0,0.939	0.391,0.192,0.196	0.703
ENSG00000119953	SMNDC1	10	-	112057324	112057503	112057324	112057486	112058405	112058548	65,89,90	31,39,41	9,9,8	36,34,27	49	38	0	0	0.619,0.639,0.63	0.162,0.17,0.187	0.456
ENSG00000159069	FBXW5	9	-	139837220	139837455	139837220	139837395	139837800	139837958	87,88,93	52,54,60	23,19,21	81103101	76	38	0	0	0.455,0.449,0.437	0.124,0.084,0.094	0.346
ENSG00000136527	TRA2B	3	-	185641583	185641796	185641583	185641772	185643251	185643414	58,71,69	2,0,0	9,10,9	34,13,15	56	38	0	0	0.952,1.0,1.0	0.152,0.343,0.289	0.723
ENSG00000168066	SF1	11	-	64534663	64534747	64534663	64534723	64535042	64535316	48,52,109	15,21,22	2,3,2	23,25,25	56	38	0	0	0.685,0.627,0.771	0.056,0.075,0.051	0.634
ENSG00000028310	BRD9	5	-	889701	889881	889701	889762	891269	891402	196254239	15,17,11	117129118	72,96,86	76	38	0	0	0.867,0.882,0.916	0.448,0.402,0.407	0.469
ENSG00000028310	BRD9	5	-	886706	886882	886706	886822	887475	887586	27,34,41	6,7,11	11,11,10	27,46,27	76	38	0	0	0.692,0.708,0.651	0.169,0.107,0.156	0.54
ENSG00000115307	AUP1	2	-	74754067	74754248	74754067	74754186	74754374	74754490	177196179	117137112	66,74,82	223293263	76	38	0	0	0.431,0.417,0.444	0.129,0.112,0.135	0.305
ENSG00000175215	CTDSP2	12	-	58220778	58220906	58220778	58220880	58221334	58221373	20,13,19	4,4,2	4,4,1	37,48,38	53	33	0	0	0.757,0.669,0.855	0.063,0.049,0.016	0.718
ENSG00000198563	DDX39B	6	-	31498555	31498726	31498555	31498703	31498829	31498974	16,12,19	59,77,81	1,2,2	183197163	55	38	0	0	0.158,0.097,0.139	0.004,0.007,0.008	0.125
ENSG00000198563	DDX39B	6	-	31506539	31506716	31506539	31506632	31506923	31507051	126149175	106,105,89	23,11,9	288228213	76	38	0	0	0.373,0.415,0.496	0.038,0.024,0.021	0.4
ENSG00000165912	PACSIN3	11	-	47204224	47204360	47204224	47204315	47204554	47204620	25,19,37	4,6,7	13,24,23	75,93,90	76	38	0	0	0.758,0.613,0.725	0.08,0.114,0.113	0.596
ENSG00000174243	DDX23	12	-	49233795	49233934	49233795	49233889	49237722	49237833	23,26,26	16,11,14	8,8,7	121,135,91	76	38	0	0	0.418,0.542,0.481	0.032,0.029,0.037	0.448
ENSG00000169242	EFNA1	1	+	155105978	155106256	155106205	155106256	155103814	155104110	16,14,19	106104106	43,44,46	1,1,0	76	38	0	0	0.07,0.063,0.082	0.956,0.957,1.0	-0.899
ENSG00000144713	RPL32	3	-	12880847	12881083	12880847	12881029	12881640	12881741	294411464	146415441818	14,14,23	115915001209	76	38	0	0	0.091,0.117,0.113	0.006,0.005,0.009	0.1
ENSG00000127054	CPSF3L	1	-	1255835	1256062	1255835	1255909	1256375	1256473	35,42,51	31,44,40	7,16,11	67,90,90	76	38	0	0	0.361,0.323,0.389	0.05,0.082,0.058	0.294
ENSG00000139620	KANSL2	12	-	49072818	49073021	49072818	49072933	49073437	49073616	29,26,31	6,1,4	1,2,3	28,34,44	76	38	0	0	0.707,0.929,0.795	0.018,0.029,0.033	0.784
ENSG00000149182	ARFGAP2	11	-	47196732	47196964	47196732	47196864	47197401	47197474	56,63,61	1,6,2	13,20,18	23,51,34	76	38	0	0	0.966,0.84,0.938	0.22,0.164,0.209	0.717
ENSG00000136699	SMPD4	2	-	130914157	130914386	130914157	130914248	130914823	130914969	15,21,25	5,7,8	5,7,6	33,48,35	76	38	0	0	0.6,0.6,0.61	0.07,0.068,0.079	0.531
ENSG00000087152	ATXN7L3	17	-	42273401	42273468	42273401	42273447	42273763	42273786	16,18,13	1,1,1	3,9,5	40,34,28	32	17	0	0	0.895,0.905,0.874	0.038,0.123,0.087	0.809
ENSG00000166012	TAF1D	11	-	93465409	93465479	93465409	93465457	93466252	93466287	620634687	140153123	87129101	319344323	45	29	0	0	0.741,0.728,0.783	0.149,0.195,0.168	0.58
ENSG00000100353	EIF3D	22	-	36913347	36913540	36913347	36913478	36914809	36914957	42,65,41	106,118,99	7,14,13	204287289	76	38	0	0	0.165,0.216,0.172	0.017,0.024,0.022	0.163
ENSG00000163481	RNF25	2	-	219530638	219530807	219530638	219530782	219530881	219530953	20,12,22	3,1,1	0,2,1	18,16,26	57	38	0	0	0.816,0.889,0.936	0.0,0.077,0.025	0.846
ENSG00000160818	GPATCH4	1	-	156565872	156566040	156565872	156565923	156566178	156566270	10,16,20	6,6,4	9,8,4	96,81,92	76	38	0	0	0.455,0.571,0.714	0.045,0.047,0.021	0.542
ENSG00000059804	SLC2A3	12	-	8085582	8085775	8085582	8085743	8086405	8086498	42,57,70	23,32,32	7,5,2	70,54,63	64	38	0	0	0.52,0.514,0.565	0.056,0.052,0.019	0.491
ENSG00000166012	TAF1D	11	-	93466515	93466671	93466515	93466563	93467790	93467826	155517331756	29,25,25	401474436	30,29,28	68	30	1.11022e-15	6.41999e-14	0.959,0.968,0.969	0.855,0.878,0.873	0.097
ENSG00000049541	RFC2	7	-	73664068	73664159	73664068	73664110	73666758	73666828	15,27,25	22,27,20	6,10,5	78,71,68	74	36	3.88578e-15	2.19919e-13	0.249,0.327,0.378	0.036,0.064,0.035	0.273
ENSG00000151923	TIAL1	10	-	121341970	121342120	121341970	121342069	121347663	121347760	48,43,64	2,3,4	27,17,23	21,20,19	76	38	6.32827e-15	3.50692e-13	0.923,0.878,0.889	0.391,0.298,0.377	0.541
ENSG00000120438	TCP1	6	-	160208774	160208934	160208774	160208903	160209089	160209175	9,23,25	36,57,74	1,1,3	103,105,73	63	38	8.43769e-15	4.58046e-13	0.131,0.196,0.169	0.006,0.006,0.024	0.153
ENSG00000133997	MED6	14	-	71063327	71063459	71063327	71063419	71064334	71064494	28,25,25	0,2,1	2,2,2	8,10,8	72	38	3.86358e-14	2.05542e-12	1.0,0.868,0.93	0.117,0.095,0.117	0.823
ENSG00000075856	SART3	12	-	108938202	108938308	108938202	108938254	108938914	108939099	57,55,64	3,3,0	36,40,37	39,34,16	76	38	4.16334e-14	2.17147e-12	0.905,0.902,1.0	0.316,0.37,0.536	0.528
ENSG00000163584	RPL22L1	3	-	170585801	170585990	170585801	170585923	170586086	170586176	290353340	55,60,50	135169160	80,72,77	76	38	7.99361e-14	4.08904e-12	0.725,0.746,0.773	0.458,0.54,0.51	0.245
ENSG00000125485	DDX31	9	-	135487473	135487700	135487473	135487642	135493716	135493828	9,5,6	2,3,2	3,1,1	31,53,43	76	38	2.51466e-13	1.26207e-11	0.692,0.455,0.6	0.046,0.009,0.011	0.56
ENSG00000163479	SSR2	1	-	155981600	155982356	155981600	155981678	155984751	155984860	11,18,20	51,75,69	3,4,5	135151147	76	38	1.95943e-12	9.65202e-11	0.097,0.107,0.127	0.011,0.013,0.017	0.097
ENSG00000106638	TBL2	7	-	72988712	72988901	72988712	72988843	72992749	72992906	59,49,56	2,0,0	8,6,3	13,3,12	76	38	3.03446e-12	1.46758e-10	0.937,1.0,1.0	0.235,0.5,0.111	0.697
ENSG00000099899	TRMT2A	22	-	20100954	20101084	20100954	20101030	20101208	20101331	16,24,34	0,1,0	14,22,11	18,18,12	76	38	5.84544e-12	2.77658e-10	1.0,0.923,1.0	0.28,0.379,0.314	0.65
ENSG00000177542	SLC25A22	11	-	794457	794588	794457	794513	794775	794901	24,22,32	25,21,16	9,5,4	39,54,45	76	38	6.16263e-12	2.87589e-10	0.324,0.344,0.5	0.103,0.044,0.043	0.326
ENSG00000162613	FUBP1	1	-	78414089	78414599	78414089	78414459	78414839	78414985	13,23,23	46,50,40	18,16,14	185200164	76	38	1.06132e-11	4.86742e-10	0.124,0.187,0.223	0.046,0.038,0.041	0.136
ENSG00000166012	TAF1D	11	-	93466515	93466671	93466515	93466585	93467790	93467826	127015051441	24,33,27	301391387	23,29,22	68	30	2.24909e-11	1.014e-09	0.959,0.953,0.959	0.852,0.856,0.886	0.092
ENSG00000166012	TAF1D	11	-	93466515	93466585	93466515	93466563	93467790	93467826	251244332	29,25,25	90,103,68	30,29,28	46	30	8.85656e-11	3.92641e-09	0.85,0.864,0.896	0.662,0.698,0.613	0.212
ENSG00000101182	PSMA7	20	-	60712419	60712521	60712419	60712482	60713226	60713346	39,31,47	463534521	17,18,15	868710628	71	38	1.11322e-10	4.85438e-09	0.043,0.03,0.046	0.01,0.013,0.013	0.028
ENSG00000116922	C1orf109	1	-	38148990	38149148	38148990	38149109	38151944	38152124	16,10,12	0,0,1	2,3,6	8,14,13	71	38	1.1631e-10	4.99007e-09	1.0,1.0,0.865	0.118,0.103,0.198	0.815
ENSG00000116809	ZBTB17	1	-	16268825	16268936	16268825	16268915	16269023	16269233	11,9,7	0,0,1	1,2,0	10,11,8	53	38	7.49546e-10	3.1153e-08	1.0,1.0,0.834	0.067,0.115,0.0	0.884
ENSG00000172819	RARG	12	-	53609076	53609246	53609076	53609218	53609429	53609578	5,13,20	3,1,3	1,4,1	28,22,12	60	38	7.43882e-10	3.1153e-08	0.514,0.892,0.809	0.022,0.103,0.05	0.68
ENSG00000187778	MCRS1	12	-	49952996	49953115	49952996	49953084	49953235	49953318	6,18,13	68,58,60	8,6,6	185216233	63	38	7.84298e-10	3.20959e-08	0.051,0.158,0.116	0.025,0.016,0.015	0.09
ENSG00000136271	DDX56	7	-	44608501	44608604	44608501	44608591	44608728	44608802	3,8,1	14,28,14	3,1,3	208246172	45	38	1.73073e-09	6.97536e-08	0.153,0.194,0.057	0.012,0.003,0.015	0.125
ENSG00000113141	IK	5	+	140041763	140042064	140041886	140042064	140041483	140041592	114159137	3,7,9	370330341	0,0,0	76	38	2.915e-09	1.1573e-07	0.95,0.919,0.884	1.0,1.0,1.0	-0.082
ENSG00000163950	SLBP	4	-	1701737	1701818	1701737	1701797	1705322	1705427	8,1,4	2,0,0	3,0,0	25,23,26	53	38	3.17147e-09	1.24061e-07	0.741,1.0,1.0	0.079,0.0,0.0	0.887
ENSG00000178381	ZFAND2A	7	-	1192542	1192877	1192542	1192860	1195088	1195220	3,8,5	1,2,4	1,3,1	32,34,30	49	38	4.00954e-09	1.54571e-07	0.699,0.756,0.492	0.024,0.064,0.025	0.611
ENSG00000132004	FBXW9	19	-	12800775	12801014	12800775	12800924	12801979	12802071	16,15,11	3,8,6	8,4,5	39,23,25	76	38	9.92854e-09	3.77285e-07	0.727,0.484,0.478	0.093,0.08,0.091	0.475
ENSG00000085872	CHERP	19	-	16641579	16641724	16641579	16641691	16643408	16643560	7,24,21	1,1,1	14,6,12	15,19,14	65	38	1.45097e-08	5.43602e-07	0.804,0.933,0.925	0.353,0.156,0.334	0.606
ENSG00000102178	UBL4A	X	-	153714109	153714422	153714109	153714318	153714566	153714672	6,5,7	0,5,0	0,6,2	74,102,46	76	38	2.53923e-08	9.38105e-07	1.0,0.333,1.0	0.0,0.029,0.021	0.761
ENSG00000163938	GNL3	3	+	52724607	52725087	52724960	52725087	52723089	52723222	12,21,7	2,6,2	160,145,94	3,0,1	76	38	4.46236e-08	1.62601e-06	0.75,0.636,0.636	0.964,1.0,0.979	-0.307
ENSG00000178950	GAK	4	-	843679	844197	843679	843856	844723	844872	9,8,1	15,18,12	1,0,0	44,50,48	76	38	5.96509e-08	2.14421e-06	0.231,0.182,0.04	0.011,0.0,0.0	0.147
ENSG00000078808	SDF4	1	-	1154148	1154385	1154148	1154307	1158623	1158737	35,51,66	28,30,30	7,12,7	35,20,25	76	38	6.53516e-08	2.28778e-06	0.385,0.459,0.524	0.091,0.231,0.123	0.308
ENSG00000198917	C9orf114	9	-	131591013	131591156	131591013	131591139	131591388	131591434	3,3,5	2,1,0	0,1,0	33,32,21	49	38	6.53651e-08	2.28778e-06	0.538,0.699,1.0	0.0,0.024,0.0	0.738
ENSG00000173039	RELA	11	-	65429649	65429818	65429649	65429676	65430296	65430389	42,57,50	0,0,2	9,22,18	4,7,8	59	21	7.98326e-08	2.75785e-06	1.0,1.0,0.899	0.445,0.528,0.445	0.494
ENSG00000165119	HNRNPK	9	-	86589431	86589533	86589431	86589504	86591909	86591966	140151194	4,10,5	27,9,11	6,4,7	61	38	8.58627e-08	2.92814e-06	0.956,0.904,0.96	0.737,0.584,0.495	0.335
ENSG00000166200	COPS2	15	-	49429544	49429655	49429544	49429634	49431724	49431850	85,88,81	33,36,30	107,84,99	91,86,98	53	38	8.97857e-08	3.02316e-06	0.649,0.637,0.659	0.457,0.412,0.42	0.219
ENSG00000104129	DNAJC17	15	-	41068393	41068599	41068393	41068490	41068739	41068825	6,5,5	1,1,2	6,13,5	33,36,44	76	38	1.09232e-07	3.58712e-06	0.75,0.714,0.556	0.083,0.153,0.054	0.577
ENSG00000168291	PDHB	3	-	58415434	58415668	58415434	58415526	58415854	58415965	13,7,20	55,62,85	3,7,4	125146116	76	38	1.08391e-07	3.58712e-06	0.106,0.053,0.105	0.012,0.023,0.017	0.071
ENSG00000175305	CCNE2	8	-	95906118	95906200	95906118	95906172	95906250	95906347	7,5,3	2,8,8	4,4,6	117129131	60	38	1.12561e-07	3.65136e-06	0.689,0.284,0.192	0.021,0.019,0.028	0.366
ENSG00000196497	IPO4	14	-	24655334	24655411	24655334	24655388	24655492	24655657	7,10,8	67,90,63	0,1,0	99,127,98	55	38	1.68393e-07	5.3967e-06	0.067,0.071,0.081	0.0,0.005,0.0	0.071
ENSG00000109332	UBE2D3	4	-	103747641	103748001	103747641	103747793	103748748	103749105	35,50,63	5,7,6	12,32,33	31,27,16	76	38	2.37994e-07	7.53647e-06	0.778,0.781,0.84	0.162,0.372,0.508	0.452
ENSG00000089737	DDX24	14	-	94521341	94524243	94521341	94521530	94526443	94526959	41,60,59	7,10,7	74,74,76	0,0,0	76	38	2.85095e-07	8.9218e-06	0.745,0.75,0.808	1.0,1.0,1.0	-0.232
ENSG00000169045	HNRNPH1	5	-	179050037	179050188	179050037	179050165	179050636	179050671	138125136	1,1,3	12,20,17	2,4,4	46	29	3.19089e-07	9.86949e-06	0.989,0.987,0.966	0.791,0.759,0.728	0.221
ENSG00000165792	METTL17	14	+	21460250	21460364	21460282	21460364	21458622	21458757	2,2,1	48,64,36	38,48,39	156135166	64	38	3.99084e-07	1.22019e-05	0.024,0.018,0.016	0.126,0.174,0.122	-0.121
ENSG00000137824	FAM82A2	15	-	41043623	41043868	41043623	41043767	41044183	41044376	6,3,9	3,2,6	6,1,2	26,23,19	76	38	7.39998e-07	2.21168e-05	0.5,0.429,0.429	0.103,0.021,0.05	0.395
ENSG00000204463	BAG6	6	-	31615367	31615621	31615367	31615603	31616453	31616528	10,12,9	73,88,87	3,3,1	97139173	50	38	7.39631e-07	2.21168e-05	0.094,0.094,0.073	0.023,0.016,0.004	0.073
ENSG00000140395	WDR61	15	-	78584957	78585227	78584957	78585130	78585508	78585614	0,1,0	85100104	18,17,14	186155138	76	38	9.73667e-07	2.87773e-05	0.0,0.005,0.0	0.046,0.052,0.048	-0.047
ENSG00000110851	PRDM4	12	-	108138319	108138459	108138319	108138438	108140051	108140201	2,4,3	0,1,0	1,0,0	12,13,15	53	38	1.16078e-06	3.39306e-05	1.0,0.741,1.0	0.056,0.0,0.0	0.895
ENSG00000175216	CKAP5	11	-	46772667	46772826	46772667	46772805	46772895	46773084	4,2,4	21,34,39	1,1,2	202160188	53	38	1.19327e-06	3.4501e-05	0.12,0.04,0.068	0.004,0.004,0.008	0.071
ENSG00000132680	KIAA0907	1	-	155886415	155886528	155886415	155886500	155887289	155887463	34,38,31	0,1,0	53,40,36	19,9,12	60	38	1.44658e-06	4.09726e-05	1.0,0.96,1.0	0.639,0.738,0.655	0.309
ENSG00000092199	HNRNPC	14	-	21731469	21731741	21731469	21731495	21737456	21737584	26,28,34	92139108	23,15,11	200147166	58	20	1.4479e-06	4.09726e-05	0.089,0.065,0.098	0.038,0.034,0.022	0.053
ENSG00000119760	SUPT7L	2	-	27883850	27884468	27883850	27884255	27885045	27885148	14,9,20	0,1,0	16,18,11	24,10,14	76	38	1.50388e-06	4.21087e-05	1.0,0.818,1.0	0.25,0.474,0.282	0.604
ENSG00000173039	RELA	11	-	65429157	65429339	65429157	65429306	65429407	65429559	6,3,5	3,3,1	3,1,1	22,21,28	65	38	1.58162e-06	4.38239e-05	0.539,0.369,0.745	0.074,0.027,0.02	0.511
ENSG00000100461	RBM23	14	-	23377541	23377608	23377541	23377589	23378691	23378804	5,1,3	2,0,0	1,1,0	10,18,33	51	38	1.61036e-06	4.41603e-05	0.651,1.0,1.0	0.069,0.04,0.0	0.847
ENSG00000076108	BAZ2A	12	-	57004192	57004323	57004192	57004301	57005356	57005417	7,6,4	4,12,3	1,7,1	33,42,35	54	38	5.06829e-06	0.000137568	0.552,0.26,0.484	0.021,0.105,0.02	0.383
ENSG00000196576	PLXNB2	22	-	50722560	50722673	50722560	50722642	50723001	50723094	10,10,5	19,14,19	1,9,10	48,91,74	63	38	5.35071e-06	0.000143767	0.241,0.301,0.137	0.012,0.056,0.075	0.179
ENSG00000146083	RNF44	5	-	175959004	175959194	175959004	175959130	175959366	175959517	38,50,68	1,1,3	9,11,7	4,6,2	76	38	5.75875e-06	0.000151864	0.95,0.962,0.919	0.529,0.478,0.636	0.396
ENSG00000092094	OSGEP	14	-	20917329	20917460	20917329	20917425	20920132	20920308	14,22,26	16,22,18	20,16,11	51,43,53	67	38	5.76628e-06	0.000151864	0.332,0.362,0.45	0.182,0.174,0.105	0.228
ENSG00000101361	NOP56	20	+	2635883	2636158	2635970	2636158	2635394	2635593	1,7,2	13,16,15	1,1,2	91,93,50	76	38	6.95058e-06	0.00018126	0.037,0.179,0.063	0.005,0.005,0.02	0.083
ENSG00000100109	TFIP11	22	-	26897865	26898060	26897865	26898018	26899631	26899759	3,8,5	5,1,10	0,0,0	30,25,30	74	38	7.45603e-06	0.000192554	0.236,0.804,0.204	0.0,0.0,0.0	0.415
ENSG00000196497	IPO4	14	-	24651483	24651629	24651483	24651609	24651997	24652048	12,5,22	88108123	2,3,3	96169105	52	38	7.56227e-06	0.00019342	0.091,0.033,0.116	0.015,0.013,0.02	0.064
ENSG00000023191	RNH1	11	-	500483	500738	500483	500654	502061	502249	8,3,12	73,71,63	1,1,4	116157116	76	38	8.14383e-06	0.000205634	0.052,0.021,0.087	0.004,0.003,0.017	0.045
ENSG00000159069	FBXW5	9	-	139837220	139837425	139837220	139837395	139837800	139837958	13,7,12	52,54,60	2,5,4	81103101	62	38	8.19445e-06	0.000205634	0.133,0.074,0.109	0.015,0.029,0.024	0.083
ENSG00000198000	NOL8	9	-	95062171	95063092	95062171	95062298	95063832	95064104	8,13,12	0,2,0	6,9,1	16,9,4	76	38	8.72639e-06	0.000216936	1.0,0.765,1.0	0.158,0.333,0.111	0.721
ENSG00000113282	CLINT1	5	-	157216370	157216575	157216370	157216521	157218710	157219003	42,41,43	2,8,4	80,70,68	44,34,28	76	38	1.13977e-05	0.00028072	0.913,0.719,0.843	0.476,0.507,0.548	0.315
ENSG00000196497	IPO4	14	-	24656872	24657019	24656872	24657002	24657421	24657463	8,11,14	57,44,57	2,2,3	67,72,67	47	36	1.23343e-05	0.000301002	0.097,0.161,0.158	0.022,0.021,0.033	0.113
ENSG00000100908	FAM158A	14	-	24608753	24609025	24608753	24608998	24610097	24610174	39,58,48	0,0,1	4,5,6	2,1,3	59	38	1.77077e-05	0.000428205	1.0,1.0,0.969	0.563,0.763,0.563	0.36
ENSG00000115380	EFEMP1	2	-	56149494	56149826	56149494	56149582	56150033	56150074	7,9,7	4,4,3	1,1,3	8,6,17	73	35	2.12202e-05	0.000508519	0.456,0.519,0.528	0.057,0.074,0.078	0.431
ENSG00000067829	IDH3G	X	-	153051221	153051464	153051221	153051428	153051666	153051727	13,21,21	30,22,31	7,10,4	45,37,42	68	38	2.40922e-05	0.000570066	0.195,0.348,0.275	0.08,0.131,0.051	0.185
ENSG00000063177	RPL18	19	-	49119335	49119477	49119335	49119459	49119982	49120081	10,20,15	483506617	1,0,2	799650567	50	38	2.42171e-05	0.000570066	0.015,0.029,0.018	0.001,0.0,0.003	0.019
ENSG00000167767	KRT80	12	-	52562779	52565341	52562779	52565306	52565441	52565497	7,8,9	1,3,1	15,23,21	20,47,40	67	38	2.89619e-05	0.000675777	0.799,0.602,0.836	0.298,0.217,0.229	0.498
ENSG00000187098	MITF	3	+	70000962	70001037	70000980	70001037	69998201	69998319	3,5,10	0,1,5	8,8,5	22,41,25	50	38	3.27423e-05	0.000757345	1.0,0.792,0.603	0.217,0.129,0.132	0.639
ENSG00000100462	PRMT5	14	-	23397334	23397450	23397334	23397420	23397705	23397824	4,3,8	27,16,28	4,5,3	126,85,92	62	38	3.49481e-05	0.000801396	0.083,0.103,0.149	0.019,0.035,0.02	0.087
ENSG00000168066	SF1	11	-	64534663	64534747	64534663	64534718	64535042	64535316	66,63,124	0,0,0	2,3,2	0,1,2	61	38	3.80383e-05	0.000864803	1.0,1.0,1.0	1.0,0.651,0.384	0.322
ENSG00000164051	CCDC51	3	-	48475116	48475386	48475116	48475281	48476226	48476425	5,5,6	3,7,7	6,4,0	28,30,24	76	38	3.92805e-05	0.000885475	0.455,0.263,0.3	0.097,0.063,0.0	0.286
ENSG00000110172	CHORDC1	11	-	89944382	89944503	89944382	89944486	89947185	89947343	15,21,5	8,13,12	5,13,6	43,46,39	49	38	5.2052e-05	0.00116352	0.593,0.556,0.244	0.083,0.18,0.107	0.341
ENSG00000183337	BCOR	X	-	39922860	39923205	39922860	39923103	39923588	39923852	4,8,9	1,3,2	7,11,9	14,25,18	76	38	7.0786e-05	0.00156909	0.667,0.571,0.692	0.2,0.18,0.2	0.45
ENSG00000177225	PDDC1	11	-	771332	771467	771332	771426	772426	772521	9,13,18	2,3,2	6,10,10	10,11,12	73	38	7.1602e-05	0.00157406	0.701,0.693,0.824	0.238,0.321,0.303	0.452
ENSG00000149428	HYOU1	11	-	118919729	118920082	118919729	118919915	118920267	118920347	8,9,11	122143110	2,2,3	190161146	76	38	7.39438e-05	0.00161222	0.032,0.031,0.048	0.005,0.006,0.01	0.03
ENSG00000100416	TRMU	22	+	46746187	46746360	46746242	46746360	46742318	46742441	2,2,1	1,1,1	67,70,74	2,1,1	76	38	8.53316e-05	0.00184538	0.5,0.5,0.333	0.944,0.972,0.974	-0.519
ENSG00000165119	HNRNPK	9	-	86582998	86584355	86582998	86584295	86585076	86585246	279286367	12,10,14	287225244	29,20,22	76	38	9.18906e-05	0.0019712	0.921,0.935,0.929	0.832,0.849,0.847	0.086
ENSG00000185813	PCYT2	17	-	79866751	79867197	79866751	79866913	79867389	79867478	15,15,11	11,10,7	4,11,16	29,32,23	76	38	0.000104935	0.00223301	0.405,0.429,0.44	0.065,0.147,0.258	0.268
ENSG00000189306	RRP7A	22	-	42912016	42912302	42912016	42912142	42914010	42914153	5,4,8	4,1,4	1,3,1	12,13,11	76	38	0.000106271	0.0022435	0.385,0.667,0.5	0.04,0.103,0.043	0.455
ENSG00000221978	CCNL2	1	-	1326145	1328183	1326145	1326245	1328775	1328840	69,79,67	0,1,1	70,74,58	5,12,7	76	38	0.000109326	0.00228981	1.0,0.975,0.971	0.875,0.755,0.806	0.17
ENSG00000204256	BRD2	6	+	32945036	32945347	32945218	32945347	32944338	32944713	0,4,3	2,2,5	5,15,7	117130110	76	38	0.000115803	0.00240652	0.0,0.5,0.231	0.021,0.055,0.031	0.208
ENSG00000117362	APH1A	1	-	150239474	150239654	150239474	150239602	150239755	150239878	11,12,17	53,45,57	11,8,8	99,121,84	76	38	0.000134896	0.00278158	0.094,0.118,0.13	0.053,0.032,0.045	0.071
ENSG00000172534	HCFC1	X	-	153217964	153218541	153217964	153218409	153219057	153219221	16,18,24	3,3,11	8,11,8	19,15,8	76	38	0.000146297	0.00299345	0.727,0.75,0.522	0.174,0.268,0.333	0.408
ENSG00000163463	KRTCAP2	1	-	155142266	155144965	155142266	155142333	155145040	155145368	1,0,1	13,22,15	8,17,8	22,18,18	76	38	0.000203038	0.00412276	0.037,0.0,0.032	0.154,0.321,0.182	-0.196
ENSG00000095794	CREM	10	+	35500181	35501883	35500583	35501883	35495822	35495979	5,7,1	4,7,5	59,49,40	14,7,6	76	38	0.000226864	0.00457164	0.385,0.333,0.091	0.678,0.778,0.769	-0.472
ENSG00000214078	CPNE1	20	-	34220084	34220170	34220084	34220156	34220232	34220307	4,5,7	112144113	1,2,2	258227216	46	38	0.000312857	0.00625714	0.029,0.028,0.049	0.003,0.007,0.008	0.029
ENSG00000161996	WDR90	16	+	705772	706537	706301	706537	705572	705703	2,15,7	1,0,0	20,21,27	0,4,1	76	38	0.000337415	0.00669794	0.5,1.0,1.0	1.0,0.724,0.931	-0.052
ENSG00000058272	PPP1R12A	12	-	80172329	80173131	80172329	80172380	80175594	80175642	1,4,5	2,0,2	5,2,0	36,26,24	76	38	0.000352136	0.0068371	0.2,1.0,0.556	0.065,0.037,0.0	0.551
ENSG00000162236	STX5	11	-	62574368	62575138	62574368	62575100	62591637	62591759	0,0,2	6,5,3	0,0,1	52,72,71	70	38	0.000349761	0.0068371	0.0,0.0,0.266	0.0,0.0,0.008	0.086
ENSG00000173145	NOC3L	10	-	96116930	96117972	96116930	96117088	96121421	96121629	6,11,5	0,2,0	109109108	0,0,0	76	38	0.000351638	0.0068371	1.0,0.733,1.0	1.0,1.0,1.0	-0.089
ENSG00000185753	CXorf38	X	-	40498260	40499572	40498260	40498380	40506258	40506393	5,22,12	5,4,6	11,12,11	30,30,20	76	38	0.000417945	0.00805605	0.333,0.733,0.5	0.155,0.167,0.216	0.343
ENSG00000161204	ABCF3	3	+	183905184	183905549	183905451	183905549	183904583	183904663	1,4,7	0,1,1	108,86,68	0,0,1	76	38	0.000432431	0.00827529	1.0,0.667,0.778	1.0,1.0,0.971	-0.175
ENSG00000132773	TOE1	1	+	45808406	45808674	45808514	45808674	45808055	45808315	5,11,13	0,0,1	15,11,18	21,15,6	76	38	0.000506029	0.00961454	1.0,1.0,0.867	0.263,0.268,0.6	0.579
ENSG00000136044	APPL2	12	-	105601748	105601825	105601748	105601807	105601935	105601977	0,1,2	4,4,4	1,0,0	46,39,42	48	36	0.000511984	0.00965871	0.0,0.158,0.273	0.016,0.0,0.0	0.138
ENSG00000078808	SDF4	1	-	1154148	1154323	1154148	1154307	1158623	1158737	8,8,11	28,30,30	1,2,0	35,20,25	48	38	0.000573799	0.0107486	0.184,0.174,0.225	0.022,0.073,0.0	0.163
ENSG00000125835	SNRPB	20	-	2442279	2442585	2442279	2442439	2443281	2443407	551562715	21,11,19	510596504	24,31,34	76	38	0.000619229	0.0115185	0.929,0.962,0.95	0.914,0.906,0.881	0.047
ENSG00000146733	PSPH	7	-	56087292	56087501	56087292	56087427	56088765	56088924	2,3,2	3,5,1	2,3,2	30,31,16	76	38	0.000637713	0.01178	0.25,0.231,0.5	0.032,0.046,0.059	0.281
ENSG00000001084	GCLC	6	-	53380906	53381020	53380906	53381015	53385575	53385758	2,3,2	0,2,1	44,51,40	0,3,0	38	38	0.000720456	0.0132166	1.0,0.6,0.667	1.0,0.944,1.0	-0.226
ENSG00000109381	ELF2	4	-	139993019	139993193	139993019	139993157	139994607	139994721	17,14,20	0,0,6	34,29,24	20,20,26	68	38	0.000780106	0.0142129	1.0,1.0,0.651	0.487,0.448,0.34	0.459
ENSG00000116062	MSH6	2	+	48025749	48028294	48025753	48028294	48023032	48023202	9,3,10	1,0,0	201133134	0,1,1	38	38	0.000800848	0.0144915	0.9,1.0,1.0	1.0,0.993,0.993	-0.029
ENSG00000164880	INTS1	7	-	1524925	1525162	1524925	1525105	1526260	1526410	4,9,7	32,46,35	2,4,2	55,65,73	76	38	0.000945066	0.0169856	0.059,0.089,0.091	0.018,0.03,0.014	0.059
ENSG00000134905	CARS2	13	-	111296731	111296953	111296731	111296830	111298313	111298437	1,3,1	28,23,41	5,23,11	37,50,43	76	38	0.0011828	0.0211158	0.018,0.061,0.012	0.063,0.187,0.113	-0.091
ENSG00000173744	AGFG1	2	+	228418419	228418511	228418425	228418511	228416674	228416833	2,8,9	4,4,4	45,73,74	6,12,6	38	38	0.00120603	0.021387	0.333,0.667,0.692	0.882,0.859,0.925	-0.325
ENSG00000175220	ARHGAP1	11	-	46701197	46701381	46701197	46701326	46701754	46701832	3,4,3	4,6,1	0,0,3	16,16,11	76	38	0.00122361	0.0215551	0.273,0.25,0.6	0.0,0.0,0.12	0.334
ENSG00000064419	TNPO3	7	-	128630014	128630256	128630014	128630154	128632052	128632144	2,1,4	1,1,1	2,1,4	15,12,13	76	38	0.00123556	0.0216222	0.5,0.333,0.667	0.063,0.04,0.133	0.421
ENSG00000071889	FAM3A	X	-	153736804	153737142	153736804	153736928	153740180	153740204	3,3,9	4,3,2	1,5,2	11,15,17	56	18	0.00127116	0.0219564	0.194,0.243,0.591	0.028,0.097,0.036	0.289
ENSG00000071889	FAM3A	X	-	153736804	153736983	153736804	153736928	153740180	153740204	3,3,9	4,3,2	1,5,2	11,15,17	56	18	0.00127116	0.0219564	0.194,0.243,0.591	0.028,0.097,0.036	0.289
ENSG00000100567	PSMA3	14	+	58718836	58718960	58718841	58718960	58714467	58714550	96141165	0,0,1	234254164	13,5,8	38	38	0.00130541	0.0224025	1.0,1.0,0.994	0.947,0.981,0.953	0.038
ENSG00000143379	SETDB1	1	+	150935449	150936217	150936005	150936217	150935062	150935195	1,2,2	0,1,0	81,60,66	0,0,0	76	38	0.00138167	0.0235592	1.0,0.5,1.0	1.0,1.0,1.0	-0.167
ENSG00000163728	TTC14	3	+	180320911	180324160	180324040	180324160	180320678	180320803	21,31,16	0,2,3	66,94,100	0,0,0	76	38	0.0014526	0.024611	1.0,0.886,0.727	1.0,1.0,1.0	-0.129
ENSG00000100908	FAM158A	14	-	24608753	24609025	24608753	24608823	24610097	24610174	13,18,23	3,1,0	13,7,7	7,3,10	76	38	0.00148564	0.0250114	0.684,0.9,1.0	0.481,0.538,0.259	0.435
ENSG00000141030	COPS3	17	-	17171198	17171359	17171198	17171291	17174071	17174121	5,11,11	22,19,31	11,15,5	88,74,55	76	38	0.00165902	0.0277547	0.102,0.224,0.151	0.059,0.092,0.043	0.094
ENSG00000100575	TIMM9	14	-	58877560	58877806	58877560	58877656	58878624	58878689	0,5,1	2,4,4	5,4,2	45,41,41	76	38	0.0019483	0.0323906	0.0,0.385,0.111	0.053,0.047,0.024	0.124
ENSG00000013306	SLC25A39	17	-	42399786	42399920	42399786	42399896	42400651	42400711	49,59,115	2,1,0	43,32,35	4,5,2	56	38	0.00201771	0.0333361	0.943,0.976,1.0	0.879,0.813,0.922	0.102
ENSG00000115368	WDR75	2	+	190313970	190315694	190315628	190315694	190313104	190313234	2,1,1	20,32,19	0,1,1	129191170	76	38	0.00205774	0.0337875	0.048,0.015,0.026	0.0,0.003,0.003	0.028
ENSG00000168374	ARF4	3	-	57569624	57569759	57569624	57569734	57570110	57570191	8,2,1	25,26,44	0,5,0	99,69,67	57	38	0.00213224	0.034584	0.176,0.049,0.015	0.0,0.046,0.0	0.065
ENSG00000115568	ZNF142	2	-	219520872	219521195	219520872	219521186	219523423	219523599	0,3,6	3,5,2	0,0,1	26,22,18	41	38	0.00212381	0.034584	0.0,0.357,0.735	0.0,0.0,0.049	0.348
ENSG00000196998	WDR45	X	-	48933524	48933637	48933524	48933604	48934088	48934183	15,13,18	37,35,55	6,11,18	86,67,67	65	38	0.00215788	0.0347876	0.192,0.178,0.161	0.039,0.088,0.136	0.089
ENSG00000188976	NOC2L	1	-	889383	889903	889383	889462	891302	891393	40,33,55	14,28,38	22,19,20	23,31,40	76	38	0.00227605	0.0364716	0.588,0.371,0.42	0.324,0.235,0.2	0.207
ENSG00000100906	NFKBIA	14	-	35871599	35871869	35871599	35871740	35871976	35872065	669717794	0,0,0	232285250	4,2,3	76	38	0.00233248	0.0371521	1.0,1.0,1.0	0.967,0.986,0.977	0.023
ENSG00000116560	SFPQ	1	-	35641980	35642075	35641980	35642072	35642919	35643000	5,8,5	0,1,0	25,38,17	27,31,16	38	38	0.00237437	0.0374398	1.0,0.889,1.0	0.481,0.551,0.515	0.447
ENSG00000047410	TPR	1	-	186322819	186323012	186322819	186322982	186324541	186324690	1,0,4	21,16,18	1,5,1	142,127,93	62	38	0.0023787	0.0374398	0.028,0.0,0.12	0.004,0.024,0.007	0.038
ENSG00000143228	NUF2	1	+	163310153	163310216	163310157	163310216	163309170	163309267	4,4,5	0,1,0	66,66,29	0,0,0	38	38	0.0024177	0.0378298	1.0,0.8,1.0	1.0,1.0,1.0	-0.067
ENSG00000050426	LETMD1	12	+	51451788	51451911	51451814	51451911	51450132	51450285	0,2,0	4,5,7	0,0,0	46,41,28	58	38	0.0024576	0.0380536	0.0,0.208,0.0	0.0,0.0,0.0	0.069
ENSG00000149182	ARFGAP2	11	-	47195309	47195466	47195309	47195433	47196565	47196649	5,2,10	0,0,1	5,10,3	13,6,5	65	38	0.00247492	0.0380536	1.0,1.0,0.854	0.184,0.494,0.26	0.639
ENSG00000122966	CIT	12	-	120171968	120172211	120171968	120172162	120172964	120173162	0,2,1	10,9,7	2,1,0	68,70,53	76	38	0.00246075	0.0380536	0.0,0.1,0.067	0.014,0.007,0.0	0.049
ENSG00000227372	TP73-AS1	1	-	3659367	3659521	3659367	3659475	3659624	3659754	17,21,22	2,0,1	5,17,7	3,8,2	76	38	0.00254498	0.038906	0.81,1.0,0.917	0.455,0.515,0.636	0.374
ENSG00000177084	POLE	12	-	133234453	133235260	133234453	133234556	133235880	133236095	1,3,0	1,6,7	0,2,1	22,49,29	76	38	0.00261163	0.0394712	0.333,0.2,0.0	0.0,0.02,0.017	0.165
ENSG00000100908	FAM158A	14	-	24608753	24608998	24608753	24608823	24610097	24610174	13,17,24	3,1,0	14,8,9	7,3,10	76	38	0.00260543	0.0394712	0.684,0.895,1.0	0.5,0.571,0.31	0.399
ENSG00000119725	ZNF410	14	+	74360478	74360635	74360499	74360635	74358729	74358911	1,2,1	4,2,7	0,0,0	23,25,16	53	38	0.0027958	0.0420159	0.152,0.418,0.093	0.0,0.0,0.0	0.221
ENSG00000096063	SRPK1	6	-	35858671	35858818	35858671	35858790	35888244	35888305	2,1,4	6,7,11	2,1,2	34,33,33	60	38	0.00286263	0.0427786	0.174,0.083,0.187	0.036,0.019,0.037	0.117
ENSG00000014138	POLA2	11	+	65063334	65063461	65063404	65063461	65063010	65063070	7,5,2	1,0,0	106114121	1,1,1	76	38	0.00315203	0.0468402	0.778,1.0,1.0	0.981,0.983,0.984	-0.057
ENSG00000213782	DDX47	12	+	12976136	12977611	12977473	12977611	12975594	12975666	8,12,11	0,0,2	94,82,81	0,0,0	76	38	0.00324763	0.0479928	1.0,1.0,0.733	1.0,1.0,1.0	-0.089

## Sheet: A5SS
GeneID	geneSymbol	chr	strand	longExonStart_0base	longExonEnd	shortES	shortEE	flankingES	flankingEE	IJC_SAMPLE_1	SJC_SAMPLE_1	IJC_SAMPLE_2	SJC_SAMPLE_2	IncFormLen	SkipFormLen	PValue	FDR	IncLevel1	IncLevel2	IncLevelDifference
ENSG00000146007	ZMAT2	5	+	140083502	140083589	140083502	140083576	140084010	140084156	27,22,16	69,69,76	1,1,0	205156174	45	38	0	0	0.248,0.212,0.151	0.004,0.005,0.0	0.201
ENSG00000166197	NOLC1	10	+	103918949	103919095	103918949	103919065	103919189	103919325	103113126	23,22,28	36,26,29	50,90,85	62	38	0	0	0.733,0.759,0.734	0.306,0.15,0.173	0.532
ENSG00000148303	RPL7A	9	+	136215106	136215672	136215106	136215243	136215776	136215897	574663786	3,7,7	39,62,46	25,22,18	76	38	0	0	0.99,0.979,0.983	0.438,0.585,0.561	0.456
ENSG00000101084	C20orf24	20	+	35238003	35238161	35238003	35238133	35240412	35240960	41,40,53	29,39,54	6,7,5	65,79,61	60	38	0	0	0.472,0.394,0.383	0.055,0.053,0.049	0.364
ENSG00000116337	AMPD2	1	+	110172854	110173061	110172854	110173028	110173304	110173415	12,22,44	7,4,7	3,1,1	48,75,72	65	38	0	0	0.501,0.763,0.786	0.035,0.008,0.008	0.666
ENSG00000213782	DDX47	12	+	12966279	12966450	12966279	12966388	12967064	12967158	75,63,84	39,43,45	1,2,0	114117116	76	38	0	0	0.49,0.423,0.483	0.004,0.008,0.0	0.461
ENSG00000132768	DPH2	1	+	44436267	44436489	44436267	44436380	44436637	44436861	73,75,99	3,6,2	10,8,9	28,33,22	76	38	0	0	0.924,0.862,0.961	0.152,0.108,0.17	0.772
ENSG00000076604	TRAF4	17	+	27074230	27074409	27074230	27074282	27074860	27074965	126159195	0,0,1	35,32,22	39,21,31	76	38	0	0	1.0,1.0,0.99	0.31,0.432,0.262	0.662
ENSG00000063046	EIF4B	12	+	53428395	53428508	53428395	53428493	53431192	53431406	254267242	404567423	296218217	1258984927	47	38	0	0	0.337,0.276,0.316	0.16,0.152,0.159	0.153
ENSG00000111640	GAPDH	12	+	6643975	6644157	6643975	6644027	6645659	6645759	102111134	145152153	15,17,13	262165128	76	38	0	0	0.26,0.267,0.305	0.028,0.049,0.048	0.236
ENSG00000180104	EXOC3	5	+	462271	462644	462271	462422	464404	465387	25,32,21	27,23,23	6,16,13	93107117	76	38	0	0	0.316,0.41,0.313	0.031,0.07,0.053	0.295
ENSG00000122140	MRPS2	9	+	138392843	138393172	138392843	138392969	138393689	138393819	29,51,73	24,31,20	7,10,5	106176138	76	38	0	0	0.377,0.451,0.646	0.032,0.028,0.018	0.465
ENSG00000058673	ZC3H11A	1	+	203765420	203765729	203765420	203765624	203770702	203770756	109114124	5,6,7	94,85,90	102106115	76	38	0	0	0.916,0.905,0.899	0.315,0.286,0.281	0.613
ENSG00000100823	APEX1	14	+	20923736	20923932	20923736	20923862	20924072	20924260	17,28,22	10,30,13	7,3,3	68,80,53	76	38	0	0	0.459,0.318,0.458	0.049,0.018,0.028	0.38
ENSG00000108179	PPIF	10	+	81111242	81111470	81111242	81111339	81112072	81112148	21,32,40	1,1,1	0,5,4	35,27,25	76	38	0	0	0.913,0.941,0.952	0.0,0.085,0.074	0.882
ENSG00000124486	USP9X	X	+	41088819	41089080	41088819	41089032	41089753	41089849	63,70,50	17,27,24	23,31,35	95,108,85	76	38	0	0	0.649,0.565,0.51	0.108,0.126,0.171	0.44
ENSG00000178028	DMAP1	1	+	44685688	44686115	44685688	44685981	44686230	44686353	23,25,34	1,6,7	1,0,3	21,30,25	76	38	0	0	0.92,0.676,0.708	0.023,0.0,0.057	0.741
ENSG00000163938	GNL3	3	+	52722124	52722222	52722124	52722208	52723089	52723222	42,59,65	18,12,23	9,13,12	108126111	46	38	0	0	0.658,0.802,0.7	0.064,0.079,0.082	0.645
ENSG00000101138	CSTF1	20	+	54970576	54970815	54970576	54970777	54972262	54972540	93116114	3,3,7	9,15,15	62,40,45	70	38	0	0	0.944,0.955,0.898	0.073,0.169,0.153	0.801
ENSG00000168564	CDKN2AIP	4	+	184366687	184366818	184366687	184366787	184367240	184369351	260315276	3,6,2	74,66,73	36,21,27	63	38	0	0	0.981,0.969,0.988	0.554,0.655,0.62	0.37
ENSG00000115317	HTRA2	2	+	74758465	74758538	74758465	74758498	74758723	74758829	33,31,31	3,1,6	6,7,12	21,40,32	61	27	0	0	0.83,0.932,0.696	0.112,0.072,0.142	0.711
ENSG00000177697	CD151	11	+	834529	834803	834529	834591	836062	836153	41,31,36	19,9,29	7,11,7	58,57,65	76	38	3.33067e-16	2.84015e-14	0.519,0.633,0.383	0.057,0.088,0.051	0.446
ENSG00000177697	CD151	11	+	834529	834745	834529	834591	836062	836153	41,31,36	19,9,29	9,14,10	58,57,65	76	38	4.79616e-14	3.912e-12	0.519,0.633,0.383	0.072,0.109,0.071	0.428
ENSG00000127191	TRAF2	9	+	139794873	139795128	139794873	139794972	139802521	139802683	13,12,25	9,6,4	7,5,5	38,82,67	76	38	9.82547e-14	7.68025e-12	0.419,0.5,0.758	0.084,0.03,0.036	0.509
ENSG00000140382	HMG20A	15	+	77750745	77750900	77750745	77750838	77756581	77756729	9,4,8	2,1,1	0,1,0	20,22,24	76	38	1.03362e-13	7.75627e-12	0.692,0.667,0.8	0.0,0.022,0.0	0.712
ENSG00000127184	COX7C	5	+	85915169	85915695	85915169	85915313	85916484	85916583	40,40,59	121143182	6,11,9	186132117	76	38	1.98952e-13	1.43551e-11	0.142,0.123,0.139	0.016,0.04,0.037	0.104
ENSG00000171763	SPATA5L1	15	+	45707784	45708007	45707784	45707977	45709466	45709597	27,35,24	1,2,3	29,26,29	32,40,25	62	38	1.59084e-12	1.10534e-10	0.943,0.915,0.831	0.357,0.285,0.416	0.544
ENSG00000129484	PARP2	14	+	20813090	20813285	20813090	20813246	20813552	20813623	16,10,11	6,0,0	5,3,2	37,30,23	71	38	1.19538e-10	8.00904e-09	0.588,1.0,1.0	0.067,0.051,0.044	0.809
ENSG00000127774	TMEM93	17	+	3572089	3572306	3572089	3572193	3572391	3572962	27,43,28	2,4,2	16,12,16	18,18,12	76	38	2.29223e-10	1.48283e-08	0.871,0.843,0.875	0.308,0.25,0.4	0.544
ENSG00000136718	IMP4	2	+	131103139	131103506	131103139	131103272	131103590	131103685	36,17,30	8,6,13	70,60,56	0,0,0	76	38	3.24527e-10	2.02938e-08	0.692,0.586,0.536	1.0,1.0,1.0	-0.395
ENSG00000111364	DDX55	12	+	124090477	124090541	124090477	124090528	124090619	124090706	7,14,21	1,2,0	1,7,4	10,19,12	45	38	3.57257e-10	2.16198e-08	0.855,0.855,1.0	0.078,0.237,0.22	0.725
ENSG00000182240	BACE2	21	+	42613745	42613874	42613745	42613866	42615302	42615437	134154136	1,8,5	224179170	41,28,35	40	38	7.7141e-10	4.52239e-08	0.992,0.948,0.963	0.838,0.859,0.822	0.128
ENSG00000211460	TSN	2	+	122514815	122515010	122514815	122514909	122516285	122516382	12,21,18	30,15,13	4,4,4	73,42,45	76	38	9.98531e-10	5.6765e-08	0.167,0.412,0.409	0.027,0.045,0.043	0.291
ENSG00000104738	MCM4	8	+	48873690	48873986	48873690	48873774	48874075	48874240	18,14,24	10,14,17	8,7,11	35,55,33	76	38	4.85523e-09	2.67895e-07	0.474,0.333,0.414	0.103,0.06,0.143	0.305
ENSG00000148291	SURF2	9	+	136223789	136224110	136223789	136223944	136224586	136224690	9,7,12	8,11,8	10,6,3	44,61,62	76	38	9.82979e-09	5.26877e-07	0.36,0.241,0.429	0.102,0.047,0.024	0.286
ENSG00000120708	TGFBI	5	+	135382023	135382245	135382023	135382184	135382539	135382704	0,0,0	59,58,66	11,11,5	50,43,30	76	38	1.2889e-08	6.71661e-07	0.0,0.0,0.0	0.099,0.113,0.077	-0.096
ENSG00000107815	C10orf2	10	+	102750625	102750811	102750625	102750767	102752946	102754158	63,82,108	0,0,0	12,15,20	7,3,4	76	38	1.45629e-08	7.38376e-07	1.0,1.0,1.0	0.462,0.714,0.714	0.37
ENSG00000102317	RBM3	X	+	48433948	48434471	48433948	48434055	48434701	48434807	70,73,109	192199274	37,32,15	202189154	76	38	2.18205e-08	1.04962e-06	0.154,0.155,0.166	0.084,0.078,0.046	0.089
ENSG00000180198	RCC1	1	+	28857034	28857127	28857034	28857085	28858314	28858502	35,33,39	3,3,1	16,16,18	11,14,11	74	38	2.145e-08	1.04962e-06	0.857,0.85,0.952	0.428,0.37,0.457	0.468
ENSG00000197622	CDC42SE1	1	-	151027491	151028469	151028152	151028469	151026706	151026797	7,9,5	1,3,2	162138116	0,0,1	76	38	5.94687e-08	2.78908e-06	0.778,0.6,0.556	1.0,1.0,0.983	-0.35
ENSG00000015479	MATR3	5	+	138614015	138614185	138614015	138614097	138614739	138614818	113103121	3,5,8	81125120	25,31,20	76	38	6.73074e-08	3.07973e-06	0.95,0.912,0.883	0.618,0.668,0.75	0.236
ENSG00000256269	HMBS	11	+	118955594	118955867	118955594	118955776	118958964	118959018	5,7,11	4,10,8	2,2,2	41,20,25	76	38	7.12079e-08	3.18062e-06	0.385,0.259,0.407	0.024,0.048,0.038	0.314
ENSG00000131051	RBM39	20	-	34326889	34328809	34328745	34328809	34319862	34320057	33,48,48	2,0,7	337267244	0,0,0	76	38	9.29104e-08	4.05348e-06	0.892,1.0,0.774	1.0,1.0,1.0	-0.111
ENSG00000168264	IRF2BP2	1	-	234744192	234745271	234744240	234745271	234740014	234743598	34,34,37	6,7,9	29,28,27	25,32,23	76	38	1.30284e-07	5.55485e-06	0.739,0.708,0.673	0.367,0.304,0.37	0.36
ENSG00000113810	SMC4	3	+	160130113	160130637	160130113	160130241	160131260	160131401	19,20,13	14,11,22	18,14,15	89,69,73	76	38	1.48452e-07	6.1888e-06	0.404,0.476,0.228	0.092,0.092,0.093	0.277
ENSG00000026025	VIM	10	+	17277167	17278378	17277167	17277388	17279228	17279592	426449522	7,12,9	696605552	0,0,0	76	38	2.402e-07	9.79597e-06	0.968,0.949,0.967	1.0,1.0,1.0	-0.039
ENSG00000181991	MRPS11	15	+	89011138	89012376	89011138	89011255	89015857	89015956	22,19,14	7,8,8	12,6,9	21,22,27	76	38	4.30782e-07	1.71946e-05	0.611,0.543,0.467	0.222,0.12,0.143	0.379
ENSG00000128928	IVD	15	+	40699836	40700011	40699836	40699926	40700137	40700189	23,25,14	14,14,24	12,13,12	55,64,47	76	38	7.36227e-07	2.87742e-05	0.451,0.472,0.226	0.098,0.092,0.113	0.282
ENSG00000082258	CCNT2	2	+	135703670	135704035	135703670	135703716	135705305	135705469	51,49,53	0,0,0	20,38,25	11,6,6	76	38	7.53563e-07	2.88507e-05	1.0,1.0,1.0	0.476,0.76,0.676	0.363
ENSG00000108773	KAT2A	17	-	40271071	40271454	40271262	40271454	40270314	40270421	2,2,3	21,22,22	34,50,36	51,64,42	76	38	7.90346e-07	2.96538e-05	0.045,0.043,0.064	0.25,0.281,0.3	-0.226
ENSG00000136718	IMP4	2	+	131102201	131102298	131102201	131102285	131102948	131103058	6,9,8	6,15,8	2,3,1	39,28,20	45	38	8.66801e-07	3.18847e-05	0.458,0.336,0.458	0.042,0.083,0.041	0.362
ENSG00000247556	OIP5-AS1	15	+	41576187	41576486	41576187	41576308	41577422	41577561	4,9,9	50,67,51	5,5,4	181198225	76	38	9.89626e-07	3.57027e-05	0.038,0.063,0.081	0.014,0.012,0.009	0.049
ENSG00000175061	C17orf76-AS1	17	+	16342640	16343017	16342640	16342728	16343498	16343567	300352453	100104132	304270205	149157120	76	38	1.02364e-06	3.6233e-05	0.6,0.629,0.632	0.505,0.462,0.461	0.144
ENSG00000244754	N4BP2L2	13	-	33101544	33101669	33101594	33101669	33096318	33096407	3,1,1	6,3,2	69,46,52	11,4,4	76	38	1.18698e-06	4.12364e-05	0.2,0.143,0.2	0.758,0.852,0.867	-0.645
ENSG00000054148	PHPT1	9	+	139744464	139745012	139744464	139744589	139745206	139745474	12,22,20	99104112	46,45,47	100112101	76	38	1.66303e-06	5.67246e-05	0.057,0.096,0.082	0.187,0.167,0.189	-0.103
ENSG00000163714	U2SURP	3	+	142731063	142731215	142731063	142731195	142733152	142733251	4,7,1	2,2,5	1,0,0	39,45,26	52	38	2.90037e-06	9.71624e-05	0.594,0.719,0.128	0.018,0.0,0.0	0.474
ENSG00000150316	CWC15	11	-	94704140	94704651	94704538	94704651	94703152	94703260	10,8,12	1,0,3	162177150	0,0,0	76	38	3.57582e-06	0.000117688	0.833,1.0,0.667	1.0,1.0,1.0	-0.167
ENSG00000130713	EXOSC2	9	+	133572968	133573638	133572968	133573014	133574715	133574781	188185194	1,0,0	194217187	10,8,11	76	38	3.95093e-06	0.000127792	0.989,1.0,1.0	0.907,0.931,0.895	0.085
ENSG00000100650	SRSF5	14	+	70233809	70234097	70233809	70233972	70234854	70234999	4,13,19	5,8,15	22,33,34	79,114,89	76	38	4.31101e-06	0.000137076	0.286,0.448,0.388	0.122,0.126,0.16	0.238
ENSG00000096746	HNRNPH3	10	+	70098259	70098444	70098259	70098399	70098896	70098983	125187144	40,39,29	102135125	48,73,70	76	38	5.79326e-06	0.000181136	0.61,0.706,0.713	0.515,0.48,0.472	0.187
ENSG00000181789	COPG1	3	+	128969524	128969737	128969524	128969577	128971123	128971204	16,21,24	56,72,66	18,9,11	99127126	76	38	8.10714e-06	0.000249328	0.125,0.127,0.154	0.083,0.034,0.042	0.082
ENSG00000100664	EIF5	14	+	103805508	103806140	103805508	103805670	103806763	103806898	172208227	8,5,7	235270212	0,0,0	76	38	1.00056e-05	0.00030275	0.915,0.954,0.942	1.0,1.0,1.0	-0.063
ENSG00000150776	C11orf57	11	+	111946290	111946408	111946290	111946367	111948938	111949039	8,5,11	6,1,5	5,6,4	25,25,19	73	38	1.48595e-05	0.000442482	0.41,0.722,0.534	0.094,0.111,0.099	0.454
ENSG00000121774	KHDRBS1	1	+	32503435	32503720	32503435	32503637	32504152	32504220	9,17,10	94119101	2,6,7	187167166	76	38	1.77865e-05	0.000521367	0.046,0.067,0.047	0.005,0.018,0.021	0.039
ENSG00000100142	POLR2F	22	+	38352779	38352908	38352779	38352849	38355352	38355483	10,10,9	19,15,22	2,0,1	17,29,21	76	38	2.61529e-05	0.000754812	0.208,0.25,0.17	0.056,0.0,0.023	0.183
ENSG00000149273	RPS3	11	+	75112683	75113490	75112683	75112777	75115063	75115251	118127197	0,2,5	9,17,15	3,3,1	76	38	4.29012e-05	0.00121943	1.0,0.969,0.952	0.6,0.739,0.882	0.233
ENSG00000165219	GAPVD1	9	+	128109097	128109274	128109097	128109220	128111668	128111798	4,5,4	4,8,2	7,9,4	51,44,49	76	38	4.66159e-05	0.00130525	0.333,0.238,0.5	0.064,0.093,0.039	0.292
ENSG00000142541	RPL13A	19	+	49993106	49993347	49993106	49993179	49993488	49993554	7318091191	2,0,0	34,57,57	1,2,1	76	38	4.9889e-05	0.00137635	0.995,1.0,1.0	0.944,0.934,0.966	0.05
ENSG00000163728	TTC14	3	+	180322012	180322126	180322012	180322097	180322265	180322395	0,2,3	7,4,7	0,0,0	47,42,31	61	38	6.4458e-05	0.00175251	0.0,0.238,0.211	0.0,0.0,0.0	0.15
ENSG00000146701	MDH2	7	+	75677478	75677840	75677478	75677544	75684147	75684316	7,11,12	21,33,26	3,1,0	22,38,28	76	38	6.8232e-05	0.00182862	0.143,0.143,0.188	0.064,0.013,0.0	0.132
ENSG00000090621	PABPC4	1	-	40036768	40037021	40036905	40037021	40035534	40035674	4,4,2	37,58,42	20,27,18	88,70,53	76	38	7.51635e-05	0.00198601	0.051,0.033,0.023	0.102,0.162,0.145	-0.101
ENSG00000160221	C21orf33	21	+	45557058	45557259	45557058	45557178	45560131	45560224	3,2,12	12,18,13	4,3,2	73,54,36	76	38	9.84349e-05	0.00256478	0.111,0.053,0.316	0.027,0.027,0.027	0.133
ENSG00000139644	TMBIM6	12	+	50135739	50136063	50135739	50135898	50146246	50146332	24,34,23	4,4,3	12,5,3	6,8,8	76	38	0.000100967	0.00259472	0.75,0.81,0.793	0.5,0.238,0.158	0.486
ENSG00000234741	GAS5	1	-	173834366	173834685	173834647	173834685	173833812	173833842	127128149	3,4,6	376431380	1,5,0	56	18	0.000113059	0.00286619	0.932,0.911,0.889	0.992,0.965,1.0	-0.075
ENSG00000178188	SH2B1	16	+	28883854	28884079	28883854	28884026	28884490	28884590	7,17,14	0,0,2	19,18,30	13,18,19	76	38	0.000122869	0.00307337	1.0,1.0,0.778	0.422,0.333,0.441	0.527
ENSG00000117616	C1orf63	1	-	25570040	25571792	25571640	25571792	25568739	25569196	15,14,14	3,2,0	96,95,81	0,0,0	76	38	0.000153857	0.00379783	0.714,0.778,1.0	1.0,1.0,1.0	-0.169
ENSG00000087087	SRRT	7	+	100483321	100483395	100483321	100483383	100483483	100483562	2,7,10	18,15,21	1,3,0	38,36,34	44	38	0.000161267	0.00387868	0.088,0.287,0.291	0.022,0.067,0.0	0.192
ENSG00000173230	GOLGB1	3	-	121449694	121449820	121449722	121449820	121448711	121448864	3,2,3	2,8,3	1,4,4	53,41,40	60	38	0.000160168	0.00387868	0.487,0.137,0.388	0.012,0.058,0.06	0.294
ENSG00000204344	STK19	6	+	31940397	31940696	31940397	31940534	31946679	31946775	6,0,6	0,2,1	1,2,1	36,40,37	76	38	0.000189138	0.00449143	1.0,0.0,0.75	0.014,0.024,0.013	0.566
ENSG00000109184	DCUN1D4	4	+	52752733	52753410	52752733	52752804	52757925	52758017	3,4,4	7,5,5	4,5,2	33,45,25	76	38	0.000192766	0.00452036	0.176,0.286,0.286	0.057,0.053,0.038	0.2
ENSG00000125779	PANK2	20	+	3888572	3888925	3888572	3888782	3891223	3891477	71,75,74	1,0,0	45,41,38	5,3,5	76	38	0.000206491	0.00478243	0.973,1.0,1.0	0.818,0.872,0.792	0.164
ENSG00000092098	RNF31	14	+	24617466	24617686	24617466	24617622	24617850	24617910	18,18,13	1,9,8	16,11,6	35,20,22	76	38	0.00028132	0.00635851	0.9,0.5,0.448	0.186,0.216,0.12	0.442
ENSG00000127314	RAP1B	12	+	69004708	69004836	69004708	69004823	69042478	69042561	2,5,3	0,0,1	1,1,1	12,4,6	45	38	0.000279247	0.00635851	1.0,1.0,0.717	0.066,0.174,0.123	0.785
ENSG00000129347	KRI1	19	-	10672342	10672521	10672466	10672521	10671844	10671941	33,31,28	0,1,3	192200205	1,0,0	76	38	0.000289386	0.00638693	1.0,0.939,0.824	0.99,1.0,1.0	-0.076
ENSG00000177479	ARIH2	3	+	49008027	49008274	49008027	49008137	49011131	49011249	9,3,10	9,23,17	1,7,3	38,53,37	76	38	0.000288386	0.00638693	0.333,0.061,0.227	0.013,0.062,0.039	0.169
ENSG00000213809	KLRK1	12	-	10531152	10532391	10532298	10532391	10530730	10530834	7,10,11	3,4,3	145123120	12,9,9	76	38	0.000316557	0.00690535	0.538,0.556,0.647	0.858,0.872,0.87	-0.286
ENSG00000198561	CTNND1	11	+	57529268	57529591	57529268	57529518	57561481	57561553	16,23,11	9,10,11	21,22,29	48,45,43	76	38	0.000337021	0.00726725	0.471,0.535,0.333	0.179,0.196,0.252	0.237
ENSG00000115677	HDLBP	2	-	242208615	242208710	242208620	242208710	242208368	242208520	1,3,1	1,1,0	1,7,4	1,0,0	38	38	0.000363729	0.00775404	0.5,0.75,1.0	0.5,1.0,1.0	-0.083
ENSG00000003756	RBM5	3	+	50126386	50126490	50126386	50126462	50127814	50127884	1,5,6	0,0,2	0,0,1	6,8,3	60	38	0.000385405	0.00812382	1.0,1.0,0.655	0.0,0.0,0.174	0.827
ENSG00000102103	PQBP1	X	+	48755194	48755376	48755194	48755365	48755774	48755859	7,19,11	1,1,2	6,10,8	9,7,8	43	38	0.00039007	0.0081308	0.861,0.944,0.829	0.371,0.558,0.469	0.412
ENSG00000049883	PTCD2	5	+	71616199	71617006	71616199	71616336	71617998	71618091	4,2,2	1,3,1	1,5,3	19,23,25	76	38	0.00042779	0.00872319	0.667,0.25,0.5	0.026,0.098,0.057	0.412
ENSG00000171634	BPTF	17	+	65941524	65942441	65941524	65942012	65943841	65943924	17,11,11	2,1,4	16,14,6	12,14,22	76	38	0.000427057	0.00872319	0.81,0.846,0.579	0.4,0.333,0.12	0.461
ENSG00000085978	ATG16L1	2	+	234181611	234182423	234181611	234181698	234183321	234183424	9,11,6	1,0,0	12,12,10	9,9,11	76	38	0.000458985	0.00925867	0.818,1.0,1.0	0.4,0.4,0.313	0.568
ENSG00000101361	NOP56	20	+	2636579	2636860	2636579	2636680	2637046	2637195	15,20,31	0,2,3	59,47,45	22,18,26	76	38	0.000482599	0.00963144	1.0,0.833,0.838	0.573,0.566,0.464	0.356
ENSG00000172732	MUS81	11	+	65631274	65631559	65631274	65631372	65631967	65632084	1,1,3	2,5,2	1,0,0	16,23,23	76	38	0.000578205	0.011418	0.2,0.091,0.429	0.03,0.0,0.0	0.23
ENSG00000156970	BUB1B	15	+	40462262	40462364	40462262	40462322	40462737	40462882	1,0,4	5,2,1	3,2,1	71,63,50	74	38	0.00058432	0.0114186	0.093,0.0,0.673	0.021,0.016,0.01	0.24
ENSG00000082153	BZW1	2	+	201676268	201676669	201676268	201676450	201677930	201678004	2,8,3	2,3,1	4,1,4	17,8,15	76	38	0.00064058	0.012389	0.333,0.571,0.6	0.105,0.059,0.118	0.407
ENSG00000136279	DBNL	7	+	44084300	44084465	44084300	44084419	44089823	44089879	4,7,3	9,14,17	4,5,0	47,41,36	76	38	0.000665296	0.0127357	0.182,0.2,0.081	0.041,0.057,0.0	0.122
ENSG00000120686	UFM1	13	+	38924135	38924364	38924135	38924192	38928375	38928433	5,10,11	8,8,7	4,5,5	21,15,22	76	38	0.000703317	0.0133275	0.238,0.385,0.44	0.087,0.143,0.102	0.244
ENSG00000099810	MTAP	9	+	21815431	21815543	21815431	21815518	21816712	21816771	0,1,1	1,11,3	0,0,2	76,82,37	57	38	0.000756377	0.0140491	0.0,0.057,0.182	0.0,0.0,0.035	0.068
ENSG00000100519	PSMC6	14	+	53173919	53174247	53173919	53174022	53175026	53175106	3,6,5	0,4,1	1,2,1	1,21,16	76	38	0.00075167	0.0140491	1.0,0.429,0.714	0.333,0.045,0.03	0.578
ENSG00000102225	CDK16	X	+	47081659	47081779	47081659	47081741	47082950	47083158	30,26,29	2,0,0	28,33,17	5,11,4	70	38	0.000960592	0.0174958	0.891,1.0,1.0	0.752,0.62,0.698	0.274
ENSG00000160209	PDXK	21	+	45152019	45152528	45152019	45152323	45153949	45154004	19,11,21	0,0,3	13,15,7	6,8,6	76	38	0.000955719	0.0174958	1.0,1.0,0.778	0.52,0.484,0.368	0.469
ENSG00000143774	GUK1	1	+	228333211	228333350	228333211	228333325	228333726	228333768	7,6,11	89,103,79	3,2,2	107111122	55	36	0.00104972	0.0189354	0.049,0.037,0.084	0.018,0.012,0.011	0.043
ENSG00000172954	LCLAT1	2	+	30670101	30670270	30670101	30670249	30748452	30748621	10,8,11	1,2,2	12,3,2	11,6,6	53	38	0.00115047	0.0201709	0.878,0.741,0.798	0.439,0.264,0.193	0.507
ENSG00000182899	RPL35A	3	+	197678029	197678199	197678029	197678182	197680873	197681018	69,70,89	376841784042	47,48,28	489848244525	49	38	0.00114313	0.0201709	0.014,0.013,0.017	0.007,0.008,0.005	0.008
ENSG00000092203	TOX4	14	+	21945654	21945751	21945654	21945723	21955609	21955852	10,3,6	1,6,2	1,3,0	12,12,11	60	38	0.00114574	0.0201709	0.864,0.241,0.655	0.05,0.137,0.0	0.524
ENSG00000012048	BRCA1	17	-	41258472	41258550	41258494	41258550	41256884	41256973	4,5,6	2,4,2	79,93,73	12,7,8	54	38	0.00130602	0.0225576	0.585,0.468,0.679	0.822,0.903,0.865	-0.286
ENSG00000175324	LSM1	8	-	38033333	38034234	38033792	38034234	38029482	38029551	1,0,1	6,9,11	0,0,0	83,62,83	76	38	0.00131065	0.0225576	0.077,0.0,0.043	0.0,0.0,0.0	0.04
ENSG00000135476	ESPL1	12	+	53662538	53662712	53662538	53662631	53662807	53663869	4,1,4	1,2,3	5,1,0	26,11,11	76	38	0.00132445	0.0225879	0.667,0.2,0.4	0.088,0.043,0.0	0.379
ENSG00000114439	BBX	3	+	107364682	107364934	107364682	107364756	107429298	107429469	1,2,3	12,13,5	6,3,1	89,83,65	76	38	0.00138116	0.0233429	0.04,0.071,0.231	0.033,0.018,0.008	0.094
ENSG00000117859	OSBPL9	1	+	52135105	52135486	52135105	52135184	52179674	52179751	0,2,1	13,9,16	0,0,0	73,70,56	76	38	0.0013988	0.0234299	0.0,0.1,0.03	0.0,0.0,0.0	0.043
ENSG00000136271	DDX56	7	-	44609582	44609727	44609613	44609727	44609407	44609502	1,2,1	24,24,31	4,1,4	311362319	63	38	0.00142225	0.0236119	0.025,0.048,0.019	0.008,0.002,0.008	0.025
ENSG00000141756	FKBP10	17	+	39975781	39976301	39975781	39975927	39976520	39976713	3,6,7	74,66,55	14,11,15	52,67,51	76	38	0.00145118	0.0238809	0.02,0.043,0.06	0.119,0.076,0.128	-0.067
ENSG00000115274	INO80B	2	+	74682944	74683077	74682944	74683063	74683229	74683399	1,2,12	7,2,3	6,1,5	49,38,37	46	38	0.00151537	0.0247203	0.106,0.452,0.768	0.092,0.021,0.1	0.371
ENSG00000196655	TRAPPC4	11	+	118889852	118890134	118889852	118890027	118890859	118890963	5,11,6	3,0,3	6,9,15	22,27,24	76	38	0.00190624	0.0308285	0.455,1.0,0.5	0.12,0.143,0.238	0.485
ENSG00000151718	WWC2	4	+	184201928	184202122	184201928	184202050	184203860	184204059	6,9,5	3,2,3	2,10,2	14,12,9	76	38	0.00198295	0.0314503	0.5,0.692,0.455	0.067,0.294,0.1	0.395
ENSG00000156983	BRPF1	3	+	9783708	9783855	9783708	9783837	9784627	9784937	9,24,24	8,6,12	20,15,27	27,30,37	50	38	0.00198146	0.0314503	0.461,0.752,0.603	0.36,0.275,0.357	0.275
ENSG00000015479	MATR3	5	+	138629438	138629717	138629438	138629494	138650363	138650425	3,5,12	0,1,1	0,4,0	2,7,2	76	38	0.00199498	0.0314503	1.0,0.714,0.857	0.0,0.222,0.0	0.783
ENSG00000077514	POLD3	11	+	74303649	74304082	74303649	74303763	74305105	74305161	2,2,4	3,3,6	6,6,8	40,36,46	76	38	0.00202835	0.0317098	0.25,0.25,0.25	0.07,0.077,0.08	0.174
ENSG00000147162	OGT	X	+	70764416	70767873	70764416	70764485	70774362	70774442	56,71,78	2,0,1	431434323	0,0,0	76	38	0.0023994	0.0368957	0.933,1.0,0.975	1.0,1.0,1.0	-0.031
ENSG00000175470	PPP2R2D	10	+	133754085	133754345	133754085	133754198	133757471	133757649	0,1,0	1,2,5	0,2,1	57,42,53	76	38	0.00239751	0.0368957	0.0,0.2,0.0	0.0,0.023,0.009	0.056
ENSG00000100129	EIF3L	22	+	38247286	38247568	38247286	38247497	38251571	38251651	23,17,29	20,21,44	9,12,12	19,40,37	76	38	0.00260173	0.0396816	0.365,0.288,0.248	0.191,0.13,0.14	0.147
ENSG00000020129	NCDN	1	+	36023756	36024085	36023756	36023824	36024707	36024848	18,15,10	0,0,2	4,5,11	8,13,2	76	38	0.00273095	0.0413166	1.0,1.0,0.714	0.2,0.161,0.733	0.54
ENSG00000221914	PPP2R2A	8	+	26151181	26151376	26151181	26151256	26196405	26196503	10,7,11	0,1,0	2,2,2	3,4,1	76	38	0.00294652	0.0442214	1.0,0.778,1.0	0.25,0.2,0.5	0.609
ENSG00000156990	RPUSD3	3	-	9880668	9880855	9880715	9880855	9879532	9879891	1,0,1	10,6,7	0,0,0	29,61,54	76	38	0.00312869	0.0465827	0.048,0.0,0.067	0.0,0.0,0.0	0.038
ENSG00000142541	RPL13A	19	+	49993106	49993554	49993106	49993179	49993731	49993833	7318091191	0,1,3	34,55,57	0,2,0	76	38	0.0032051	0.0471432	1.0,0.998,0.995	1.0,0.932,1.0	0.02
ENSG00000173230	GOLGB1	3	-	121388043	121388202	121388058	121388202	121386907	121387005	1,1,1	0,1,1	0,0,2	17,17,16	47	38	0.00321659	0.0471432	1.0,0.447,0.447	0.0,0.0,0.092	0.601
ENSG00000249915	PDCD6	5	+	304291	306869	304291	304336	311407	311517	9,13,15	4,2,2	44,34,29	2,0,0	76	38	0.00339125	0.0493177	0.529,0.765,0.789	0.917,1.0,1.0	-0.278
ENSG00000108946	PRKAR1A	17	+	66508542	66508720	66508542	66508689	66511534	66511717	4,1,5	21,33,33	1,0,1	43,60,53	63	38	0.00346459	0.0499967	0.103,0.018,0.084	0.014,0.0,0.011	0.06

## Sheet: MXE
GeneID	geneSymbol	chr	strand	1stExonStart_0base	1stExonEnd	2ndExonStart_0base	2ndExonEnd	upstreamES	upstreamEE	downstreamES	downstreamEE	IJC_SAMPLE_1	SJC_SAMPLE_1	IJC_SAMPLE_2	SJC_SAMPLE_2	IncFormLen	SkipFormLen	PValue	FDR	IncLevel1	IncLevel2	IncLevelDifference
ENSG00000156976	EIF4A2	3	+	186504915	186505053	186505591	186505671	186504290	186504434	186506913	186507689	160162184	681816662	281292291	368430409	76	76	0	0	0.19,0.166,0.217	0.433,0.404,0.416	-0.227
ENSG00000156976	EIF4A2	3	+	186504915	186505053	186505591	186505671	186503952	186504062	186506098	186506205	69,91,80	57,66,74	0,1,0	279322297	76	76	0	0	0.548,0.58,0.519	0.0,0.003,0.0	0.548
ENSG00000156976	EIF4A2	3	+	186504915	186505053	186505591	186505671	186503952	186504062	186506913	186507689	116143156	682817662	0,1,0	368430408	76	76	0	0	0.145,0.149,0.191	0.0,0.002,0.0	0.161
ENSG00000156976	EIF4A2	3	+	186505283	186505373	186505591	186505671	186503952	186504062	186506913	186507686	340429414	682817662	1,1,0	368430408	76	76	0	0	0.333,0.344,0.385	0.003,0.002,0.0	0.352
ENSG00000156976	EIF4A2	3	+	186505283	186505373	186506098	186506205	186504915	186505053	186506913	186507670	477551563	34,39,34	428388323	195193198	76	76	0	0	0.933,0.934,0.943	0.687,0.668,0.62	0.278
ENSG00000166483	WEE1	11	+	9606988	9607074	9607995	9608166	9606804	9606900	9608257	9608403	2,6,1	37,62,51	63,59,54	91,66,54	76	76	0	0	0.051,0.088,0.019	0.409,0.472,0.5	-0.408
ENSG00000143621	ILF2	1	-	153637695	153637812	153638138	153638204	153634511	153635032	153640030	153640133	161156122	13,15,21	486383339	0,0,0	76	76	0	0	0.925,0.912,0.853	1.0,1.0,1.0	-0.103
ENSG00000143621	ILF2	1	-	153636518	153636606	153636871	153636950	153634511	153635032	153637695	153637812	106130171	36,38,42	347426339	0,0,0	76	76	0	0	0.746,0.774,0.803	1.0,1.0,1.0	-0.226
ENSG00000143621	ILF2	1	-	153635180	153635271	153636518	153636606	153634540	153635032	153636871	153636950	36,46,52	246348325	28,18,21	633648683	76	76	0	0	0.128,0.117,0.138	0.042,0.027,0.03	0.095
ENSG00000118515	SGK1	6	-	134494160	134494292	134494599	134494704	134493799	134493912	134495142	134495218	333038743666	98121119	109313231287	315270309	76	76	0	0	0.971,0.97,0.969	0.776,0.831,0.806	0.166
ENSG00000118515	SGK1	6	-	134493330	134493454	134493799	134493912	134492774	134492870	134494160	134494292	98123118	94101130	315270309	68,59,48	76	76	0	0	0.51,0.549,0.476	0.822,0.821,0.866	-0.325
ENSG00000118515	SGK1	6	-	134494411	134494704	134495142	134495218	134494160	134494292	134495648	134495724	602630860	453569553	178229213	1144916711	76	76	0	0	0.571,0.525,0.609	0.135,0.2,0.231	0.38
ENSG00000118515	SGK1	6	-	134493799	134493912	134494160	134494292	134493330	134493454	134494411	134494495	434560541	87611201140	1144916711	892750592	76	76	0	0	0.331,0.333,0.322	0.562,0.55,0.546	-0.224
ENSG00000118515	SGK1	6	-	134495142	134495218	134495648	134495724	134494599	134494704	134495869	134496034	46,59,68	331738643652	213129144	109313231287	76	76	0	0	0.014,0.015,0.018	0.163,0.089,0.101	-0.102
ENSG00000215301	DDX3X	X	+	41201989	41202089	41202468	41202604	41201747	41201906	41203282	41203381	45,52,51	16,22,11	772694648	0,1,1	76	76	0	0	0.738,0.703,0.823	1.0,0.999,0.998	-0.244
ENSG00000215301	DDX3X	X	+	41202468	41202604	41202989	41203075	41201747	41201906	41203282	41203381	16,22,11	31,26,26	0,1,1	360465397	76	76	0	0	0.34,0.458,0.297	0.0,0.002,0.003	0.363
ENSG00000113460	BRIX1	5	+	34922799	34922873	34923105	34923156	34922321	34922392	34923237	34923339	7,4,5	9,6,8	0,0,0	415361388	76	76	0	0	0.438,0.4,0.385	0.0,0.0,0.0	0.408
ENSG00000113460	BRIX1	5	+	34923237	34923339	34924951	34925080	34922321	34922392	34925330	34926101	44,43,38	116127161	1,0,0	356409331	76	76	0	0	0.275,0.253,0.191	0.003,0.0,0.0	0.239
ENSG00000113460	BRIX1	5	+	34922321	34922392	34923237	34923339	34915856	34916002	34924951	34925080	51,73,61	23,33,37	1,0,0	657536448	76	76	0	0	0.689,0.689,0.622	0.002,0.0,0.0	0.666
ENSG00000113460	BRIX1	5	+	34922321	34922392	34924951	34925080	34915856	34916002	34925330	34925450	55,79,74	119133171	1,0,0	356409331	76	76	0	0	0.316,0.373,0.302	0.003,0.0,0.0	0.329
ENSG00000165244	ZNF367	9	-	99154679	99154818	99160445	99160596	99148222	99150741	99179894	99180611	10,9,7	4,7,5	4,4,0	87,97,110	76	76	0	0	0.714,0.563,0.583	0.044,0.04,0.0	0.592
ENSG00000169813	HNRNPF	10	-	43890077	43890136	43891903	43892038	43881469	43883384	43904537	43904614	50,82,57	77,80,91	5,5,3	605784751	76	76	0	0	0.394,0.506,0.385	0.008,0.006,0.004	0.422
ENSG00000153187	HNRNPU	1	-	245020899	245021019	245021312	245021576	245019205	245019460	245022030	245022143	118120152	22,30,38	347332280	0,1,1	76	76	0	0	0.843,0.8,0.8	1.0,0.997,0.996	-0.183
ENSG00000152795	HNRPDL	4	-	83348342	83348457	83349430	83349599	83347189	83347282	83350400	83351019	176207220	112127110	525438420	4,6,7	76	76	0	0	0.611,0.62,0.667	0.992,0.986,0.984	-0.355
ENSG00000152795	HNRPDL	4	-	83348342	83348457	83349170	83349332	83347189	83347282	83349430	83349599	106148128	121139121	304321293	4,6,7	76	76	0	0	0.467,0.516,0.514	0.987,0.982,0.977	-0.483
ENSG00000152795	HNRPDL	4	-	83347189	83347282	83347615	83347786	83345781	83346036	83348342	83348457	190195224	236270267	380406355	205148153	76	76	0	0	0.446,0.419,0.456	0.65,0.733,0.699	-0.254
ENSG00000108424	KPNB1	17	+	45745551	45745776	45747043	45747235	45735873	45736026	45748067	45748198	15,12,25	19,16,19	0,0,0	52,66,53	76	76	0	0	0.441,0.429,0.568	0.0,0.0,0.0	0.479
ENSG00000086061	DNAJA1	9	+	33026810	33026988	33029882	33029987	33026472	33026614	33030437	33030665	17,27,16	10,14,15	26,36,29	187215226	76	76	0	0	0.63,0.659,0.516	0.122,0.143,0.114	0.475
ENSG00000107937	GTPBP4	10	+	1038428	1038599	1041868	1041972	1034337	1034467	1042045	1042182	32,39,31	26,28,42	33,31,22	198243209	76	76	0	0	0.552,0.582,0.425	0.143,0.113,0.095	0.403
ENSG00000131051	RBM39	20	-	34327314	34327469	34328446	34328519	34326889	34326939	34328745	34328809	8,8,11	13,20,13	172177158	8,21,12	76	76	0	0	0.381,0.286,0.458	0.956,0.894,0.929	-0.551
ENSG00000111641	NOP2	12	-	6671049	6671137	6672246	6672336	6670096	6670236	6672480	6672680	8,14,16	14,13,20	85,97,76	1,0,0	76	76	0	0	0.364,0.519,0.444	0.988,1.0,1.0	-0.554
ENSG00000134057	CCNB1	5	+	68463999	68464170	68467096	68467279	68463734	68463905	68470703	68470890	25,19,34	19,27,16	160153156	5,6,7	76	76	0	0	0.568,0.413,0.68	0.97,0.962,0.957	-0.409
ENSG00000114867	EIF4G1	3	+	184046418	184046544	184049053	184049152	184045373	184045492	184049259	184049394	23,25,27	167190204	0,3,4	350334284	76	76	0	0	0.121,0.116,0.117	0.0,0.009,0.014	0.11
ENSG00000163938	GNL3	3	+	52721261	52721399	52722124	52722208	52719935	52720121	52723089	52723222	6,5,12	18,13,23	0,0,0	108126111	76	76	0	0	0.25,0.278,0.343	0.0,0.0,0.0	0.29
ENSG00000255717	SNHG1	11	-	62621023	62621062	62621272	62621305	62620546	62620587	62621990	62622023	17,15,23	10,5,13	3,1,3	53,46,44	40	52	0	0	0.688,0.796,0.697	0.069,0.027,0.081	0.668
ENSG00000255717	SNHG1	11	-	62621990	62622023	62622604	62622688	62619459	62620153	62622895	62623218	10,7,9	16,30,33	32,27,35	0,0,0	76	54	0	0	0.308,0.142,0.162	1.0,1.0,1.0	-0.796
ENSG00000170776	AKAP13	15	+	86064658	86064806	86076814	86077111	85923959	85924029	86087002	86087186	18,28,21	9,19,5	4,6,2	108,118,91	76	76	0	0	0.667,0.596,0.808	0.036,0.048,0.022	0.655
ENSG00000166851	PLK1	16	+	23698789	23698945	23699988	23700066	23691404	23691573	23700558	23700713	26,24,29	15,18,16	0,0,0	61,57,57	76	76	0	0	0.634,0.571,0.644	0.0,0.0,0.0	0.616
ENSG00000004455	AK2	1	-	33480122	33480195	33490042	33490168	33473584	33476434	33502336	33502471	16,18,19	25,21,26	39,38,34	0,2,1	76	76	0	0	0.39,0.462,0.422	1.0,0.95,0.971	-0.549
ENSG00000086589	RBM22	5	-	150078060	150078193	150078817	150078833	150076352	150076453	150080005	150080059	4,4,4	21,25,21	72,65,72	12,12,6	20	76	0	0	0.42,0.378,0.42	0.958,0.954,0.979	-0.558
ENSG00000165732	DDX21	10	+	70726773	70726959	70728731	70728877	70719561	70720005	70729956	70730106	4,9,14	33,45,49	0,0,0	298289300	76	76	0	0	0.108,0.167,0.222	0.0,0.0,0.0	0.166
ENSG00000165732	DDX21	10	+	70723046	70723225	70725132	70725250	70719561	70720005	70726773	70726959	12,17,20	73,84,89	0,0,4	399344340	76	76	0	0	0.141,0.168,0.183	0.0,0.0,0.012	0.16
ENSG00000113407	TARS	5	+	33448646	33448837	33455049	33455171	33441151	33441249	33455691	33455809	21,16,22	159176169	0,1,0	689608813	76	76	0	0	0.117,0.083,0.115	0.0,0.002,0.0	0.104
ENSG00000113407	TARS	5	+	33448646	33448837	33453393	33453517	33441151	33441249	33455049	33455171	21,16,24	89104116	0,1,0	549443425	76	76	0	0	0.191,0.133,0.171	0.0,0.002,0.0	0.164
ENSG00000100644	HIF1A	14	+	62211422	62211531	62212408	62212535	62204804	62205091	62213651	62214976	28,32,30	63,73,69	20,14,20	498426419	76	76	0	0	0.308,0.305,0.303	0.039,0.032,0.046	0.266
ENSG00000100644	HIF1A	14	+	62193423	62193536	62199135	62199242	62188226	62188372	62200855	62201003	25,26,14	108,125,98	0,0,0	760683761	76	76	0	0	0.188,0.172,0.125	0.0,0.0,0.0	0.162
ENSG00000163660	CCNL1	3	-	156867624	156867766	156869965	156870030	156867273	156867385	156870824	156870945	4,4,1	79,73,104	20,29,15	38,32,27	76	76	0	0	0.048,0.052,0.01	0.345,0.475,0.357	-0.356
ENSG00000234741	GAS5	1	-	173834366	173834420	173834647	173834685	173833812	173833842	173835665	173835705	13,11,18	128129149	1,5,0	376431380	46	58	1.11022e-16	1.31278e-14	0.114,0.097,0.132	0.003,0.014,0.0	0.109
ENSG00000165732	DDX21	10	+	70723046	70723225	70728731	70728877	70719561	70720005	70729956	70730106	4,9,8	33,45,49	0,0,0	298289300	76	76	1.11022e-16	1.31278e-14	0.108,0.167,0.14	0.0,0.0,0.0	0.138
ENSG00000149480	MTA2	11	-	62364108	62364297	62364787	62364887	62363750	62363809	62365081	62365184	28,27,24	4,8,4	303330313	0,0,0	76	76	5.55112e-16	6.43263e-14	0.875,0.771,0.857	1.0,1.0,1.0	-0.166
ENSG00000136153	LMO7	13	+	76335067	76335174	76369536	76369567	76210458	76210862	76370771	76370885	6,7,5	10,10,13	0,1,0	105,97,113	76	50	1.44329e-15	1.63969e-13	0.283,0.315,0.202	0.0,0.007,0.0	0.264
ENSG00000215301	DDX3X	X	+	41205757	41205875	41206111	41206265	41205481	41205663	41206564	41206704	130131202	88,111,95	284315279	619584575	76	76	6.43929e-15	7.17486e-13	0.596,0.541,0.68	0.315,0.35,0.327	0.275
ENSG00000142178	SIK1	21	-	44838139	44838421	44838900	44839117	44837422	44837654	44839232	44839358	40,61,79	14,17,29	252306279	13,20,15	76	76	7.77156e-15	8.49593e-13	0.741,0.782,0.731	0.951,0.939,0.949	-0.195
ENSG00000163811	WDR43	2	+	29129325	29129447	29135455	29135576	29117508	29117789	29136934	29137074	7,5,7	14,10,13	0,2,1	108106112	76	76	1.67644e-14	1.79875e-12	0.333,0.333,0.35	0.0,0.019,0.009	0.329
ENSG00000102317	RBM3	X	+	48434202	48434471	48434701	48434807	48433948	48434055	48435413	48435497	0,0,1	198202275	15,18,22	202190154	76	76	1.86517e-14	1.96488e-12	0.0,0.0,0.004	0.069,0.087,0.125	-0.092
ENSG00000135316	SYNCRIP	6	-	86332199	86332405	86333694	86333830	86323823	86325065	86346684	86346861	47,51,69	11,24,9	178155147	0,3,2	76	76	3.27516e-14	3.38862e-12	0.81,0.68,0.885	1.0,0.981,0.987	-0.198
ENSG00000215301	DDX3X	X	+	41206111	41206265	41206564	41206704	41205757	41205875	41206892	41207289	73,70,77	284381337	335293296	487581604	76	76	3.4639e-14	3.52102e-12	0.204,0.155,0.186	0.408,0.335,0.329	-0.176
ENSG00000163660	CCNL1	3	-	156876654	156876764	156877193	156877268	156867624	156867766	156877580	156878549	81106106	22,25,22	99,65,80	0,0,0	76	76	8.29337e-14	8.28479e-12	0.786,0.809,0.828	1.0,1.0,1.0	-0.192
ENSG00000118515	SGK1	6	-	134494160	134494292	134494411	134494495	134493799	134493912	134494599	134494704	190276380	100131121	239259162	315270309	76	76	2.18048e-13	2.10561e-11	0.655,0.678,0.758	0.431,0.49,0.344	0.275
ENSG00000134222	PSRC1	1	-	109823398	109823668	109823729	109823873	109822177	109822778	109824240	109824682	6,1,7	17,17,22	12,20,14	1,0,1	76	76	2.1716e-13	2.10561e-11	0.261,0.056,0.241	0.923,1.0,0.933	-0.766
ENSG00000163811	WDR43	2	+	29152444	29152576	29165177	29165247	29117508	29117789	29169315	29169365	12,6,11	21,10,24	0,1,0	60,53,52	76	76	8.26117e-13	7.84676e-11	0.364,0.375,0.314	0.0,0.019,0.0	0.345
ENSG00000186432	KPNA4	3	-	160227587	160227659	160231864	160231969	160225894	160226057	160233239	160233368	9,20,10	34,27,31	11,4,12	197206272	76	76	1.09646e-12	1.00839e-10	0.209,0.426,0.244	0.053,0.019,0.042	0.255
ENSG00000167721	TSR1	17	-	2228597	2228714	2232636	2232769	2227982	2228123	2233808	2233919	8,11,7	67,59,66	0,0,0	168182166	76	76	1.08835e-12	1.00839e-10	0.107,0.157,0.096	0.0,0.0,0.0	0.12
ENSG00000143621	ILF2	1	-	153635494	153635609	153635690	153635752	153634511	153635032	153636518	153636606	366439302	13,11,19	8179301064	0,0,0	76	76	2.8485e-12	2.57878e-10	0.966,0.976,0.941	1.0,1.0,1.0	-0.039
ENSG00000234741	GAS5	1	-	173835665	173835705	173835898	173835934	173834608	173834685	173836128	173836181	12,12,13	11,10,12	29,34,25	0,0,0	60	68	4.25704e-12	3.79466e-10	0.553,0.576,0.551	1.0,1.0,1.0	-0.44
ENSG00000166451	CENPN	16	+	81051362	81051439	81053704	81053881	81050930	81050990	81056201	81056303	18,11,21	10,4,9	29,44,34	88126120	76	76	1.11439e-11	9.78296e-10	0.643,0.733,0.7	0.248,0.259,0.221	0.449
ENSG00000166012	TAF1D	11	-	93466515	93466563	93467790	93467826	93465409	93465457	93469306	93469470	14,17,15	8,19,8	74,51,40	2,1,3	60	76	1.44708e-11	1.2514e-09	0.689,0.531,0.704	0.979,0.985,0.944	-0.328
ENSG00000114850	SSR3	3	-	156266654	156266792	156271443	156271570	156262096	156262228	156272745	156272938	91101113	13,13,24	182138149	2,4,1	76	76	2.3792e-11	2.02722e-09	0.875,0.886,0.825	0.989,0.972,0.993	-0.123
ENSG00000255717	SNHG1	11	-	62622359	62622410	62622604	62622688	62621990	62622023	62622895	62622960	37,26,34	5,8,14	33,38,43	81,96,58	65	65	2.87306e-11	2.41254e-09	0.881,0.765,0.708	0.289,0.284,0.426	0.452
ENSG00000113575	PPP2CA	5	-	133537538	133537712	133541612	133541822	133536675	133536765	133561450	133561833	100121117	4,7,4	221237220	64,56,48	76	76	4.39606e-11	3.63868e-09	0.962,0.945,0.967	0.775,0.809,0.821	0.156
ENSG00000112029	FBXO5	6	-	153293406	153293589	153294180	153294271	153291663	153292549	153296041	153296756	16,13,38	99128134	28,21,25	36,25,28	76	76	1.12164e-10	9.15326e-09	0.139,0.092,0.221	0.438,0.457,0.472	-0.305
ENSG00000131051	RBM39	20	-	34326889	34326939	34328745	34328809	34319862	34320057	34329862	34330024	148151115	34,50,48	337329340	337267244	76	76	1.2655e-10	1.01838e-08	0.813,0.751,0.706	0.5,0.552,0.582	0.212
ENSG00000169251	NMD3	3	+	160960295	160960441	160965045	160965118	160951186	160951267	160967241	160967348	5,3,4	4,3,6	0,0,0	39,47,57	76	76	1.30824e-10	1.03834e-08	0.556,0.5,0.4	0.0,0.0,0.0	0.485
ENSG00000204713	TRIM27	6	-	28876749	28876865	28879472	28879495	28872330	28872442	28887788	28888019	1,5,4	1,5,1	120160138	2,1,0	34	76	1.38369e-10	1.08339e-08	0.691,0.691,0.899	0.993,0.997,1.0	-0.236
ENSG00000166197	NOLC1	10	+	103916945	103917085	103917205	103917312	103916775	103916831	103917805	103917971	36,49,58	31,37,50	252193197	60,67,52	76	76	3.30574e-10	2.5538e-08	0.537,0.57,0.537	0.808,0.742,0.791	-0.232
ENSG00000135486	HNRNPA1	12	+	54676356	54676449	54676862	54677018	54676177	54676270	54677595	54677751	17,15,11	14,20,20	0,0,0	35,30,14	76	76	3.61125e-10	2.75311e-08	0.548,0.429,0.355	0.0,0.0,0.0	0.444
ENSG00000164045	CDC25A	3	-	48224418	48224520	48228192	48228269	48219343	48219478	48229267	48229846	7,14,13	17,17,16	21,33,25	2,5,0	76	76	3.67759e-10	2.76727e-08	0.292,0.452,0.448	0.913,0.868,1.0	-0.53
ENSG00000082258	CCNT2	2	+	135710210	135710281	135710799	135710838	135705299	135705469	135712050	135712408	1,0,1	5,7,9	10,15,14	1,1,0	76	66	4.03165e-10	2.99479e-08	0.148,0.0,0.088	0.897,0.929,1.0	-0.863
ENSG00000118515	SGK1	6	-	134494160	134494292	134494411	134494495	134493330	134493454	134494599	134494704	184270371	7,26,19	239259162	0,0,0	76	76	5.8503e-10	4.29072e-08	0.963,0.912,0.951	1.0,1.0,1.0	-0.058
ENSG00000142178	SIK1	21	-	44837422	44837654	44840889	44841013	44834394	44836997	44841122	44841247	1,3,5	3,6,11	49,42,23	6,2,4	76	76	7.06809e-10	5.11906e-08	0.25,0.333,0.313	0.891,0.955,0.852	-0.601
ENSG00000173848	NET1	10	+	5494320	5494488	5495257	5495309	5488571	5488821	5495446	5495523	5,2,3	3,5,11	0,0,0	80104114	76	76	9.18709e-10	6.57161e-08	0.625,0.286,0.214	0.0,0.0,0.0	0.375
ENSG00000143621	ILF2	1	-	153637695	153637812	153640475	153640553	153634511	153635032	153640928	153641033	183163188	6,7,12	547423483	0,0,0	76	76	1.08713e-09	7.64597e-08	0.968,0.959,0.94	1.0,1.0,1.0	-0.044
ENSG00000113460	BRIX1	5	+	34923237	34923339	34924951	34925080	34922799	34922873	34925330	34926101	11,6,6	112128164	1,0,0	356409331	76	76	1.0953e-09	7.64597e-08	0.089,0.045,0.035	0.003,0.0,0.0	0.055
ENSG00000166451	CENPN	16	+	81053704	81053881	81056201	81056303	81051362	81051439	81058319	81058383	25,32,26	9,5,7	119110119	128158155	76	76	1.89612e-09	1.30787e-07	0.735,0.865,0.788	0.482,0.41,0.434	0.354
ENSG00000142871	CYR61	1	+	86047610	86047967	86048098	86048307	86047047	86047261	86048422	86048566	37,44,39	130014711525	3,7,7	25,35,46	76	76	6.55526e-09	4.46837e-07	0.028,0.029,0.025	0.107,0.167,0.132	-0.108
ENSG00000166855	CLPX	15	-	65451024	65451089	65456366	65456526	65450083	65450248	65458968	65459123	10,6,8	3,1,4	79,93,93	0,0,0	76	76	8.57093e-09	5.77441e-07	0.769,0.857,0.667	1.0,1.0,1.0	-0.236
ENSG00000197622	CDC42SE1	1	-	151027491	151027602	151028152	151028469	151026712	151026797	151029131	151029262	1,3,2	7,9,5	0,0,1	162138117	76	76	1.00607e-08	6.7002e-07	0.125,0.25,0.286	0.0,0.0,0.008	0.218
ENSG00000062650	WAPAL	10	-	88205998	88206206	88211723	88211888	88197676	88197772	88212976	88213092	2,3,6	2,3,3	70,54,54	0,1,0	76	76	1.24682e-08	8.2092e-07	0.5,0.5,0.667	1.0,0.982,1.0	-0.438
ENSG00000110422	HIPK3	11	+	33307958	33309057	33358620	33358740	33279132	33279435	33360302	33360389	4,6,11	12,15,21	6,9,4	112117115	76	76	1.28745e-08	8.38144e-07	0.25,0.286,0.344	0.051,0.071,0.034	0.241
ENSG00000130164	LDLR	19	+	11226769	11226888	11230767	11230909	11224210	11224438	11233849	11234020	8,5,6	1,4,2	121105126	0,0,1	76	76	1.53423e-08	9.87706e-07	0.889,0.556,0.75	1.0,1.0,0.992	-0.266
ENSG00000255717	SNHG1	11	-	62620546	62620587	62621023	62621062	62620080	62620153	62621272	62621305	25,29,34	3,1,6	211193157	0,0,0	55	59	1.57341e-08	1.00179e-06	0.899,0.969,0.859	1.0,1.0,1.0	-0.091
ENSG00000113460	BRIX1	5	+	34923237	34923339	34924951	34925080	34915856	34916002	34925330	34925450	6,8,7	119133171	1,0,0	356409331	76	76	1.97505e-08	1.24385e-06	0.048,0.057,0.039	0.003,0.0,0.0	0.047
ENSG00000096384	HSP90AB1	6	+	44216366	44216513	44217113	44217320	44214823	44214932	44217411	44217571	72,76,72	9,8,14	168,110,91	1,3,0	76	76	2.52179e-08	1.5711e-06	0.889,0.905,0.837	0.994,0.973,1.0	-0.112
ENSG00000215301	DDX3X	X	+	41203282	41203381	41204432	41204577	41201747	41201906	41204656	41204801	9,10,7	69,71,107	0,0,0	129102112	76	76	3.18057e-08	1.96045e-06	0.115,0.123,0.061	0.0,0.0,0.0	0.1
ENSG00000138434	SSFA2	2	+	182757341	182757387	182760756	182760806	182756922	182757004	182761634	182761691	59,49,48	23,29,20	154181156	209204200	76	76	3.29381e-08	2.00888e-06	0.72,0.628,0.706	0.424,0.47,0.438	0.241
ENSG00000163961	RNF168	3	-	196202101	196202183	196214269	196214449	196198630	196199643	196229743	196230548	4,5,6	1,6,4	1,4,0	32,49,43	76	76	3.48067e-08	2.10073e-06	0.8,0.455,0.6	0.03,0.075,0.0	0.583
ENSG00000164338	UTP15	5	+	72874841	72874975	72875141	72875200	72873680	72873830	72875701	72876339	2,4,3	3,3,6	0,0,0	50,36,46	76	76	4.09184e-08	2.44413e-06	0.4,0.571,0.333	0.0,0.0,0.0	0.435
ENSG00000108064	TFAM	10	+	60148429	60148579	60154117	60154174	60145104	60145408	60154687	60154944	4,5,3	52,60,62	0,0,0	261244291	76	76	5.63023e-08	3.32873e-06	0.071,0.077,0.046	0.0,0.0,0.0	0.065
ENSG00000134333	LDHA	11	+	18420977	18421095	18422383	18422557	18418365	18418515	18426995	18427119	11,16,12	6,10,11	13,20,35	0,0,0	76	76	5.71989e-08	3.34758e-06	0.647,0.615,0.522	1.0,1.0,1.0	-0.405
ENSG00000189091	SF3B3	16	+	70603908	70604052	70604997	70605102	70602185	70602398	70605575	70608820	10,7,9	69,74,101	0,0,0	106,124,91	76	76	7.028e-08	4.07202e-06	0.127,0.086,0.082	0.0,0.0,0.0	0.098
ENSG00000168066	SF1	11	-	64534371	64534551	64534663	64534723	64532077	64532990	64535042	64535316	16,23,22	25,34,34	24,26,28	7,10,3	76	76	8.23645e-08	4.72495e-06	0.39,0.404,0.393	0.774,0.722,0.903	-0.404
ENSG00000139697	SBNO1	12	-	123789128	123789266	123793856	123793949	123782524	123782718	123794035	123794130	14,7,8	5,4,2	62,48,46	0,0,0	76	76	8.50624e-08	4.83188e-06	0.737,0.636,0.8	1.0,1.0,1.0	-0.276
ENSG00000175063	UBE2C	20	+	44443022	44443109	44444179	44444384	44442075	44442103	44444492	44444552	4,3,2	27,30,26	7,5,2	386527455	60	60	1.25761e-07	7.07438e-06	0.129,0.091,0.071	0.018,0.009,0.004	0.087
ENSG00000113575	PPP2CA	5	-	133536025	133536187	133536675	133536765	133534776	133534895	133537538	133537712	2,4,6	90,94,100	64,56,47	266282293	76	76	1.37328e-07	7.65074e-06	0.022,0.041,0.057	0.194,0.166,0.138	-0.126
ENSG00000075131	TIPIN	15	-	66641652	66641775	66644466	66644545	66633487	66633694	66645152	66645293	11,10,7	4,2,3	74,94,67	1,0,1	76	76	1.5392e-07	8.49345e-06	0.733,0.833,0.7	0.987,1.0,0.985	-0.235
ENSG00000165732	DDX21	10	+	70726773	70726959	70728731	70728877	70721837	70721913	70729956	70730106	1,4,4	33,44,50	0,0,0	298289300	76	76	1.58323e-07	8.654e-06	0.029,0.083,0.074	0.0,0.0,0.0	0.062
ENSG00000070961	ATP2B1	12	-	90028554	90028680	90035934	90036132	90004969	90005149	90049455	90049844	6,8,18	3,5,3	68,53,45	0,0,0	76	76	2.00413e-07	1.08523e-05	0.667,0.615,0.857	1.0,1.0,1.0	-0.287
ENSG00000103035	PSMD7	16	+	74334949	74335042	74335452	74335550	74334012	74334104	74336109	74336190	9,11,11	12,18,13	31,10,19	131134115	76	76	2.17765e-07	1.16827e-05	0.429,0.379,0.458	0.191,0.069,0.142	0.288
ENSG00000113407	TARS	5	+	33456106	33456171	33457361	33457508	33441098	33441249	33458670	33458769	4,8,8	168197177	0,0,0	501567551	76	76	2.78707e-07	1.4815e-05	0.023,0.039,0.043	0.0,0.0,0.0	0.035
ENSG00000118515	SGK1	6	-	134494599	134494704	134495142	134495218	134494160	134494292	134495648	134495724	602630860	26,35,31	178229213	0,0,0	76	76	3.24734e-07	1.71046e-05	0.959,0.947,0.965	1.0,1.0,1.0	-0.043
ENSG00000134333	LDHA	11	+	18420977	18421095	18422383	18422557	18418365	18418515	18424386	18424560	14,19,12	6,10,9	15,21,36	0,0,0	76	76	3.55843e-07	1.85744e-05	0.7,0.655,0.571	1.0,1.0,1.0	-0.358
ENSG00000166012	TAF1D	11	-	93465409	93465457	93469859	93469917	93464918	93464965	93470229	93470405	20,20,31	66,54,75	107,126,78	121,131,91	76	76	3.68554e-07	1.90661e-05	0.233,0.27,0.292	0.469,0.49,0.462	-0.209
ENSG00000152601	MBNL1	3	+	152150505	152150709	152163070	152163328	152132729	152132900	152180173	152183568	30,22,24	11,14,20	75,95,88	12,10,11	76	76	6.06157e-07	3.10803e-05	0.732,0.611,0.545	0.862,0.905,0.889	-0.256
ENSG00000182944	EWSR1	22	+	29669726	29669853	29674119	29674205	29668368	29668420	29678378	29678546	12,20,10	131153132	6,7,4	187302254	76	76	6.24195e-07	3.17244e-05	0.084,0.116,0.07	0.031,0.023,0.016	0.067
ENSG00000125484	GTF3C4	9	+	135558949	135559080	135562625	135562714	135553363	135555190	135564267	135570342	14,11,24	34,56,48	59,66,55	38,67,37	76	76	7.10941e-07	3.5819e-05	0.292,0.164,0.333	0.608,0.496,0.598	-0.304
ENSG00000204387	C6orf48	6	+	31803187	31803228	31805012	31805212	31802684	31802977	31807319	31807538	44,39,51	90,95,88	120,114,95	95109104	70	76	7.38024e-07	3.6863e-05	0.347,0.308,0.386	0.578,0.532,0.498	-0.189
ENSG00000151151	IPMK	10	-	59959000	59959082	59997489	59997575	59951277	59956459	60027181	60027694	15,23,25	1,1,1	6,9,11	11,9,7	76	76	7.77657e-07	3.85106e-05	0.938,0.958,0.962	0.353,0.5,0.611	0.465
ENSG00000134057	CCNB1	5	+	68470077	68470236	68471223	68471364	68467096	68467279	68473350	68473457	32,24,36	2,3,2	228220244	0,0,0	76	76	8.85926e-07	4.35005e-05	0.941,0.889,0.947	1.0,1.0,1.0	-0.074
ENSG00000100644	HIF1A	14	+	62207472	62207906	62211422	62211531	62203606	62203827	62212408	62212535	3,5,5	109,99,92	1,0,0	661679649	76	76	9.20423e-07	4.48146e-05	0.027,0.048,0.052	0.002,0.0,0.0	0.042
ENSG00000100888	CHD8	14	-	21859105	21859222	21859621	21859801	21853352	21854335	21859991	21860105	3,2,3	10,5,12	42,57,34	24,19,10	76	76	9.38975e-07	4.5243e-05	0.231,0.286,0.2	0.636,0.75,0.773	-0.481
ENSG00000166851	PLK1	16	+	23692234	23692379	23699988	23700066	23691404	23691573	23700558	23700713	16,20,28	15,18,16	218278234	61,57,57	76	76	9.44841e-07	4.5243e-05	0.516,0.526,0.636	0.781,0.83,0.804	-0.246
ENSG00000221926	TRIM16	17	-	15539349	15539583	15546034	15546130	15531273	15532512	15554404	15555260	1,7,2	1,2,4	54,56,61	1,0,0	76	76	9.96871e-07	4.69583e-05	0.5,0.778,0.333	0.982,1.0,1.0	-0.457
ENSG00000009954	BAZ1B	7	-	72903523	72903721	72912826	72913028	72884674	72884813	72922656	72922801	22,17,22	4,3,2	108,82,79	0,0,0	76	76	9.93141e-07	4.69583e-05	0.846,0.85,0.917	1.0,1.0,1.0	-0.129
ENSG00000124486	USP9X	X	+	41025124	41025467	41026734	41026830	41012200	41012334	41027259	41027471	6,8,4	3,3,3	0,1,0	14,7,15	76	76	1.14549e-06	5.35238e-05	0.667,0.727,0.571	0.0,0.125,0.0	0.613
ENSG00000111011	RSRC2	12	-	122995655	122995735	122999651	122999774	122992764	122992997	123001773	123001977	40,61,47	8,7,10	176189158	10,1,7	76	76	1.1854e-06	5.49458e-05	0.833,0.897,0.825	0.946,0.995,0.958	-0.115
ENSG00000156482	RPL30	8	-	99054872	99055003	99057170	99057316	99053948	99054078	99057574	99057627	102,93,128	97010731394	172133124	837968807	76	76	1.2199e-06	5.56542e-05	0.095,0.08,0.084	0.17,0.121,0.133	-0.055
ENSG00000156482	RPL30	8	-	99054872	99054946	99057170	99057316	99053948	99054078	99057574	99057627	102,93,128	97010721393	172133124	837966807	76	76	1.21255e-06	5.56542e-05	0.095,0.08,0.084	0.17,0.121,0.133	-0.055
ENSG00000168256	NKIRAS2	17	+	40173581	40173689	40174416	40174658	40172114	40172222	40175671	40177076	0,2,2	4,8,7	19,43,24	6,9,8	76	76	1.33569e-06	6.04606e-05	0.0,0.2,0.222	0.76,0.827,0.75	-0.638
ENSG00000135316	SYNCRIP	6	-	86332199	86332405	86349938	86350046	86323823	86325065	86350163	86350282	30,22,35	9,21,8	57,47,50	0,3,2	76	76	1.48231e-06	6.65776e-05	0.769,0.512,0.814	1.0,0.94,0.962	-0.269
ENSG00000004799	PDK4	7	-	95221822	95221909	95222071	95222256	95217038	95217137	95223010	95223082	46,62,37	8,5,2	130108107	1,0,0	76	76	1.5633e-06	6.96751e-05	0.852,0.925,0.949	0.992,1.0,1.0	-0.089
ENSG00000113575	PPP2CA	5	-	133536675	133536765	133537538	133537712	133536025	133536187	133541612	133541822	111134102	6,1,6	218198183	26,42,27	76	76	1.57706e-06	6.97516e-05	0.949,0.993,0.944	0.893,0.825,0.871	0.099
ENSG00000165792	METTL17	14	+	21460250	21460364	21461276	21462222	21458622	21458757	21462701	21462776	2,3,1	27,31,32	38,48,39	110,91,58	76	76	1.66254e-06	7.29756e-05	0.069,0.088,0.03	0.257,0.345,0.402	-0.272
ENSG00000165271	NOL6	9	-	33469496	33469665	33470009	33470189	33468955	33469119	33472001	33472118	11,13,16	3,1,7	57,51,54	0,0,0	76	76	1.84862e-06	8.05332e-05	0.786,0.929,0.696	1.0,1.0,1.0	-0.196
ENSG00000082258	CCNT2	2	+	135710210	135710281	135710799	135711949	135705305	135705469	135712050	135712369	1,0,1	6,7,9	10,15,14	6,3,3	76	76	1.93634e-06	8.3725e-05	0.143,0.0,0.1	0.625,0.833,0.824	-0.68
ENSG00000009954	BAZ1B	7	-	72903523	72903721	72907129	72907251	72884674	72884813	72912826	72913028	28,15,25	5,1,2	117,110,96	0,0,0	76	76	1.98094e-06	8.5019e-05	0.848,0.938,0.926	1.0,1.0,1.0	-0.096
ENSG00000165732	DDX21	10	+	70725132	70725250	70726773	70726959	70719561	70720005	70728731	70728877	5,2,4	58,76,65	1,3,0	340301349	76	76	2.08338e-06	8.87581e-05	0.079,0.026,0.058	0.003,0.01,0.0	0.05
ENSG00000156976	EIF4A2	3	+	186505283	186505373	186505591	186505671	186503952	186504062	186506098	186506205	4,4,3	57,66,74	2,1,0	279322297	76	76	2.11548e-06	8.94676e-05	0.066,0.057,0.039	0.007,0.003,0.0	0.051
ENSG00000112306	RPS12	6	+	133136110	133136363	133138098	133138200	133135870	133135921	133138618	133138703	29,28,19	4,12,10	60,39,30	2,0,0	76	76	2.20535e-06	9.25926e-05	0.879,0.7,0.655	0.968,1.0,1.0	-0.245
ENSG00000148341	SH3GLB2	9	-	131774514	131774577	131776689	131776782	131772398	131772488	131777049	131777183	31,36,38	15,19,12	114,119,96	13,13,16	76	76	2.62778e-06	0.000109535	0.674,0.655,0.76	0.898,0.902,0.857	-0.189
ENSG00000143621	ILF2	1	-	153636871	153636950	153640928	153641033	153634511	153635032	153642311	153642354	81,86,90	7,1,6	250215187	0,1,0	75	75	2.6722e-06	0.000110591	0.92,0.989,0.938	1.0,0.995,1.0	-0.049
ENSG00000244005	NFS1	20	-	34220716	34220845	34243123	34243266	34220438	34220618	34246851	34246936	1,3,4	38,50,56	35,33,11	66,61,66	76	76	3.36688e-06	0.000138353	0.026,0.057,0.067	0.347,0.351,0.143	-0.23
ENSG00000163811	WDR43	2	+	29135455	29135576	29165177	29165247	29129325	29129447	29169315	29169365	20,13,20	19,11,24	159167149	60,53,52	76	76	3.40386e-06	0.000138887	0.513,0.542,0.455	0.726,0.759,0.741	-0.239
ENSG00000140332	TLE3	15	-	70358352	70358557	70368434	70368497	70352868	70352988	70386870	70386915	8,15,7	1,2,2	143143123	3,0,0	76	76	3.88143e-06	0.000156495	0.889,0.882,0.778	0.979,1.0,1.0	-0.143
ENSG00000215301	DDX3X	X	+	41203491	41203652	41204432	41204577	41201747	41201906	41204656	41204801	6,8,5	69,71,107	0,0,0	129102112	76	76	3.88943e-06	0.000156495	0.08,0.101,0.045	0.0,0.0,0.0	0.075
ENSG00000254870	ATP6V1G2-DDX39B	6	-	31498829	31498974	31499072	31499182	31497995	31498227	31500556	31500688	57,59,65	6,4,6	80107116	0,0,0	76	76	5.24736e-06	0.000209677	0.905,0.937,0.915	1.0,1.0,1.0	-0.081
ENSG00000163938	GNL3	3	+	52721261	52721399	52722124	52722222	52720784	52720843	52723089	52723222	31,38,45	2,6,6	342353339	7,10,9	76	76	5.5302e-06	0.000219466	0.939,0.864,0.882	0.98,0.972,0.974	-0.08
ENSG00000155096	AZIN1	8	-	103846416	103846491	103846893	103846975	103842048	103842164	103848483	103848618	3,3,5	1,1,3	50,65,31	1,0,0	76	76	6.44139e-06	0.000253887	0.75,0.75,0.625	0.98,1.0,1.0	-0.285
ENSG00000165732	DDX21	10	+	70721837	70721913	70725132	70725250	70719561	70720005	70726773	70726959	49,53,41	73,84,89	494390332	399344340	76	76	7.52058e-06	0.000294421	0.402,0.387,0.315	0.553,0.531,0.494	-0.158
ENSG00000100109	TFIP11	22	-	26906582	26906668	26907084	26907161	26906029	26906247	26908064	26908141	2,1,5	1,0,0	0,1,0	18,12,13	76	76	8.66097e-06	0.00033679	0.667,1.0,1.0	0.0,0.077,0.0	0.863
ENSG00000094804	CDC6	17	+	38457079	38457282	38457719	38457860	38451607	38451708	38458163	38459171	1,1,0	5,6,5	0,0,0	173166146	76	76	9.05101e-06	0.00034961	0.167,0.143,0.0	0.0,0.0,0.0	0.103
ENSG00000108465	CDK5RAP3	17	+	46052524	46052703	46053234	46053379	46051765	46051814	46054077	46054188	4,3,3	4,17,9	0,0,0	39,53,40	76	76	9.42786e-06	0.000361755	0.5,0.15,0.25	0.0,0.0,0.0	0.3
ENSG00000033030	ZCCHC8	12	-	122962387	122962505	122962752	122962839	122957416	122958822	122964736	122964858	1,4,1	5,21,11	31,32,30	31,25,21	76	76	9.56982e-06	0.000364787	0.167,0.16,0.083	0.5,0.561,0.588	-0.413
ENSG00000215301	DDX3X	X	+	41201989	41202089	41202468	41202604	41201747	41201906	41202989	41203075	44,51,51	18,27,16	773694648	164,127,96	76	76	1.05699e-05	0.000400274	0.71,0.654,0.761	0.825,0.845,0.871	-0.139
ENSG00000126746	ZNF384	12	-	6779925	6780004	6782381	6782606	6778196	6778355	6787292	6787509	4,8,6	3,9,5	7,4,8	50,34,34	76	76	1.27996e-05	0.000481562	0.571,0.471,0.545	0.123,0.105,0.19	0.39
ENSG00000108296	CWC25	17	-	36969047	36969117	36971113	36971350	36966720	36966848	36977153	36977326	5,7,9	1,1,1	18,16,14	42,29,20	76	76	1.32495e-05	0.000495277	0.833,0.875,0.9	0.3,0.356,0.412	0.513
ENSG00000156976	EIF4A2	3	+	186504915	186505053	186505591	186505671	186504290	186504434	186506098	186506205	113110108	56,65,74	281292291	279322298	76	76	1.53465e-05	0.000569984	0.669,0.629,0.593	0.502,0.476,0.494	0.14
ENSG00000134419	RPS15A	16	-	18796059	18796145	18799384	18799464	18792616	18794424	18800302	18800440	22,41,30	1,2,5	1,1,1	1,2,5	76	76	1.69233e-05	0.000624544	0.957,0.953,0.857	0.5,0.333,0.167	0.589
ENSG00000073712	FERMT2	14	-	53360010	53360145	53385840	53386074	53326290	53326432	53417129	53417295	17,29,17	2,3,1	128,112,99	0,0,0	76	76	1.76678e-05	0.000647895	0.895,0.906,0.944	1.0,1.0,1.0	-0.085
ENSG00000082898	XPO1	2	-	61724013	61724142	61725807	61725927	61722589	61722748	61725999	61726048	10,3,9	48,37,55	29,32,20	598568454	76	76	1.86764e-05	0.000680571	0.172,0.075,0.141	0.046,0.053,0.042	0.082
ENSG00000117450	PRDX1	1	-	45980544	45980667	45984609	45984726	45976718	45977086	45987500	45987628	24,19,35	8,5,5	40,47,29	0,0,0	76	76	1.91547e-05	0.000693638	0.75,0.792,0.875	1.0,1.0,1.0	-0.194
ENSG00000111912	NCOA7	6	+	126248808	126248904	126249319	126249393	126243827	126243980	126249781	126252257	9,16,15	45,47,65	55,47,32	43,70,52	76	76	1.99012e-05	0.000716194	0.167,0.254,0.188	0.561,0.402,0.381	-0.245
ENSG00000198492	YTHDF2	1	+	29064770	29064850	29068914	29070498	29064169	29064194	29095440	29096286	5,7,5	5,2,4	49,30,16	0,2,1	57	57	2.1443e-05	0.000766918	0.5,0.778,0.556	1.0,0.938,0.941	-0.348
ENSG00000070961	ATP2B1	12	-	90013775	90014017	90035934	90036132	90004969	90005149	90049455	90049884	6,8,18	8,2,3	68,53,45	2,1,0	76	76	2.55701e-05	0.000908917	0.429,0.8,0.857	0.971,0.981,1.0	-0.289
ENSG00000177410	ZNFX1-AS1	20	+	47897021	47897107	47897439	47897501	47895640	47895745	47905581	47905797	250345333	80,90,71	392352335	152148170	76	76	3.14328e-05	0.0011105	0.758,0.793,0.824	0.721,0.704,0.663	0.096
ENSG00000165732	DDX21	10	+	70721837	70721913	70723046	70723225	70719561	70720005	70725132	70725250	49,53,40	28,37,53	495390332	153126118	76	76	3.25412e-05	0.00114269	0.636,0.589,0.43	0.764,0.756,0.738	-0.201
ENSG00000058673	ZC3H11A	1	+	203816311	203816815	203817458	203817535	203809433	203809502	203818838	203819154	6,14,12	45,45,35	109,110,99	157138151	76	76	3.56368e-05	0.00124385	0.118,0.237,0.255	0.41,0.444,0.396	-0.213
ENSG00000005483	MLL5	7	+	104681285	104681470	104714065	104714124	104654654	104654982	104715089	104715224	10,7,8	8,16,14	4,3,7	46,35,47	76	76	3.71205e-05	0.00128788	0.556,0.304,0.364	0.08,0.079,0.13	0.312
ENSG00000221926	TRIM16	17	-	15546034	15546130	15554404	15555260	15539349	15539583	15580489	15580594	0,1,4	2,4,3	2,1,0	118,79,43	76	76	3.79024e-05	0.00130718	0.0,0.2,0.571	0.017,0.013,0.0	0.247
ENSG00000146247	PHIP	6	-	79668191	79668317	79671406	79671527	79664530	79664680	79672813	79672969	4,6,8	1,1,4	38,35,43	0,0,0	76	76	3.89043e-05	0.00133379	0.8,0.857,0.667	1.0,1.0,1.0	-0.225
ENSG00000130164	LDLR	19	+	11213339	11213462	11215895	11216276	11210898	11211021	11217240	11217363	3,5,7	7,13,19	58,73,74	49,45,41	76	76	4.52926e-05	0.00154368	0.3,0.278,0.269	0.542,0.619,0.643	-0.319
ENSG00000234741	GAS5	1	-	173833812	173833842	173834366	173834420	173833394	173833442	173834647	173834685	40,53,49	7,7,10	87100103	1,6,3	70	42	4.65637e-05	0.00157772	0.774,0.82,0.746	0.981,0.909,0.954	-0.168
ENSG00000107938	C10orf137	10	+	127424212	127424473	127426486	127426558	127422203	127422312	127426863	127427014	4,4,5	2,1,2	1,0,0	7,9,8	76	76	4.83198e-05	0.0016277	0.667,0.8,0.714	0.125,0.0,0.0	0.685
ENSG00000234741	GAS5	1	-	173834366	173834420	173834647	173834685	173833812	173833842	173835898	173835934	3,5,6	128128149	1,5,0	377431380	42	54	4.89361e-05	0.00162952	0.029,0.048,0.049	0.003,0.015,0.0	0.036
ENSG00000213782	DDX47	12	+	12967064	12967158	12974141	12974330	12966279	12966450	12974588	12974660	0,3,1	14,21,7	0,0,0	99,96,119	76	76	4.88895e-05	0.00162952	0.0,0.125,0.125	0.0,0.0,0.0	0.083
ENSG00000213782	DDX47	12	+	12967064	12967158	12974141	12974330	12966287	12966388	12974588	12974660	39,43,45	14,21,8	114117116	99,96,119	76	76	5.08831e-05	0.00168467	0.736,0.672,0.849	0.535,0.549,0.494	0.226
ENSG00000086589	RBM22	5	-	150078060	150078193	150080005	150080059	150076352	150076453	150080493	150080608	1,3,1	6,7,8	28,25,14	12,12,6	76	76	5.69023e-05	0.00187325	0.143,0.3,0.111	0.7,0.676,0.7	-0.507
ENSG00000111142	METAP2	12	+	95869918	95869954	95879654	95879757	95867927	95868106	95887831	95887993	2,6,2	37,37,62	0,0,0	117,113,84	60	76	6.00426e-05	0.00196546	0.064,0.17,0.039	0.0,0.0,0.0	0.091
ENSG00000234741	GAS5	1	-	173834366	173834420	173834647	173834685	173833812	173833842	173835314	173835344	3,6,7	127128150	3,5,1	376431380	36	48	6.52815e-05	0.00212495	0.031,0.059,0.059	0.011,0.015,0.003	0.04
ENSG00000164430	MB21D1	6	-	74149931	74150168	74155250	74155470	74133431	74135301	74161247	74161999	1,3,4	5,9,5	10,6,6	1,0,0	76	76	7.07848e-05	0.00229121	0.167,0.25,0.444	0.909,1.0,1.0	-0.683
ENSG00000100644	HIF1A	14	+	62211422	62211531	62212408	62212535	62207472	62207906	62213651	62214976	92,92,89	63,73,69	443302327	498426419	76	76	7.15158e-05	0.00230201	0.594,0.558,0.563	0.471,0.415,0.438	0.13
ENSG00000163660	CCNL1	3	-	156876654	156876764	156877193	156877268	156867273	156867385	156877580	156878549	81104107	10,8,5	99,65,80	0,0,0	76	76	7.96151e-05	0.00254856	0.89,0.929,0.955	1.0,1.0,1.0	-0.075
ENSG00000053372	MRTO4	1	+	19584326	19584478	19584970	19585047	19583557	19583639	19585174	19586622	2,1,5	25,19,23	0,0,0	61,73,69	76	76	8.25006e-05	0.00262642	0.074,0.05,0.179	0.0,0.0,0.0	0.101
ENSG00000122042	UBL3	13	-	30346248	30346335	30351291	30351400	30338507	30341444	30423648	30424821	1,2,4	0,3,1	43,31,12	0,1,0	76	76	8.69906e-05	0.00275423	1.0,0.4,0.8	1.0,0.969,1.0	-0.256
ENSG00000164111	ANXA5	4	-	122602825	122602916	122607442	122607527	122599569	122599649	122617735	122617779	102,97,122	682874669	91,114,84	114310381001	76	76	9.01876e-05	0.00283993	0.13,0.1,0.154	0.074,0.099,0.077	0.045
ENSG00000170776	AKAP13	15	+	86028940	86028984	86064658	86064806	85923945	85924029	86076814	86077111	2,0,4	21,29,25	12,11,8	17,25,5	76	76	9.06996e-05	0.00284061	0.087,0.0,0.138	0.414,0.306,0.615	-0.37
ENSG00000166225	FRS2	12	+	69924644	69924740	69925793	69925836	69864154	69864310	69955959	69956054	6,4,2	1,1,0	4,6,2	17,16,13	76	74	9.22024e-05	0.00287215	0.854,0.796,1.0	0.186,0.267,0.13	0.689
ENSG00000143621	ILF2	1	-	153636518	153636606	153636871	153636950	153635180	153635271	153637695	153637812	99130165	0,7,5	347426339	0,0,0	76	76	9.94403e-05	0.00308105	1.0,0.949,0.971	1.0,1.0,1.0	-0.027
ENSG00000107938	C10orf137	10	+	127422640	127422752	127424212	127424473	127422203	127422312	127426486	127426558	1,1,1	7,7,7	45,57,46	29,42,36	76	76	0.000108591	0.00334667	0.125,0.125,0.125	0.608,0.576,0.561	-0.457
ENSG00000182944	EWSR1	22	+	29669729	29669853	29674119	29674205	29668368	29668420	29678378	29678546	5,18,5	131153132	6,4,3	187302254	76	76	0.000113475	0.0034787	0.037,0.105,0.036	0.031,0.013,0.012	0.041
ENSG00000138750	NUP54	4	-	77045801	77045909	77065301	77065445	77039227	77039347	77065542	77065626	7,2,1	2,1,1	10,14,8	59,46,52	76	76	0.000115634	0.00352624	0.778,0.667,0.5	0.145,0.233,0.133	0.478
ENSG00000163811	WDR43	2	+	29124852	29124990	29129325	29129447	29117508	29117789	29135455	29135576	34,29,42	22,17,21	163118102	159169149	76	76	0.000118324	0.00358937	0.607,0.63,0.667	0.506,0.411,0.406	0.194
ENSG00000107262	BAG1	9	-	33258917	33259031	33261084	33261167	33256798	33256906	33262699	33262828	45,53,71	7,2,3	115,118,84	39,21,25	76	76	0.000119649	0.00361067	0.865,0.964,0.959	0.747,0.849,0.771	0.14
ENSG00000166004	KIAA1731	11	+	93428662	93428800	93429485	93429583	93425092	93425196	93429847	93433352	2,3,2	14,14,15	113108102	125148137	76	76	0.000123002	0.00369261	0.125,0.176,0.118	0.475,0.422,0.427	-0.302
ENSG00000213782	DDX47	12	+	12974141	12974330	12974588	12974660	12967064	12967158	12974898	12975017	33,18,34	6,6,6	61,43,54	40,34,35	76	76	0.000138125	0.00412525	0.846,0.75,0.85	0.604,0.558,0.607	0.226
ENSG00000166012	TAF1D	11	-	93465409	93465457	93466515	93466563	93463446	93463613	93467790	93467826	29,26,27	6,7,12	30,29,28	0,1,1	68	68	0.000161846	0.00480891	0.829,0.788,0.692	1.0,0.967,0.966	-0.208
ENSG00000011426	ANLN	7	+	36435874	36436028	36455366	36455493	36429429	36429653	36458852	36459088	123141126	12,14,15	429357349	88,82,83	76	76	0.000162832	0.00481351	0.911,0.91,0.894	0.83,0.813,0.808	0.088
ENSG00000166851	PLK1	16	+	23693384	23693478	23695190	23695410	23691404	23691573	23698789	23698945	3,1,0	20,26,14	1,6,3	327339347	76	76	0.000168477	0.0049551	0.13,0.037,0.0	0.003,0.017,0.009	0.046
ENSG00000101191	DIDO1	20	-	61527882	61528348	61537238	61537452	61526161	61526266	61538498	61538711	5,5,2	0,1,1	56,79,61	0,0,0	76	76	0.000179034	0.00523899	1.0,0.833,0.667	1.0,1.0,1.0	-0.167
ENSG00000067533	RRP15	1	+	218478369	218478467	218480772	218480974	218475635	218475901	218504289	218511325	8,15,16	17,22,19	71,96,83	47,56,30	76	76	0.000184721	0.00537826	0.32,0.405,0.457	0.602,0.632,0.735	-0.262
ENSG00000130826	DKC1	X	+	153997441	153997585	153999033	153999154	153995530	153995657	154001405	154001524	0,6,0	31,28,40	0,1,0	130173134	76	76	0.00018847	0.00545999	0.0,0.176,0.0	0.0,0.006,0.0	0.057
ENSG00000121579	NAA50	3	-	113441752	113441819	113442268	113442388	113439776	113440784	113442805	113442942	17,14,19	47,61,81	26,45,34	310320225	76	76	0.000199497	0.00575067	0.266,0.187,0.19	0.077,0.123,0.131	0.104
ENSG00000154734	ADAMTS1	21	-	28212594	28212881	28213316	28213484	28212193	28212380	28214176	28214309	126149161	280315349	70,83,91	90,125,78	76	76	0.000206691	0.00592856	0.31,0.321,0.316	0.438,0.399,0.538	-0.143
ENSG00000100664	EIF5	14	+	103802372	103802454	103804663	103804809	103801989	103802269	103805071	103805230	16,17,20	72,103,58	219193161	370389422	76	76	0.000212355	0.006061	0.182,0.142,0.256	0.372,0.332,0.276	-0.133
ENSG00000113407	TARS	5	+	33462010	33462111	33466975	33467090	33461262	33461400	33467664	33467943	2,1,4	62,65,77	0,0,0	491405284	76	76	0.000215685	0.00612589	0.031,0.015,0.049	0.0,0.0,0.0	0.032
ENSG00000145632	PLK2	5	-	57753910	57754355	57754551	57754668	57753314	57753410	57754811	57755332	184219240	157142181	75,68,71	31,26,30	76	76	0.000222766	0.00629613	0.54,0.607,0.57	0.708,0.723,0.703	-0.139
ENSG00000106723	SPIN1	9	+	91063855	91063904	91083286	91083520	91041296	91041506	91089992	91093609	16,13,20	61,65,52	103103100	190171158	76	76	0.000241985	0.00680613	0.208,0.167,0.278	0.352,0.376,0.388	-0.154
ENSG00000187098	MITF	3	+	70000962	70001037	70005605	70005681	69998201	69998319	70008423	70008571	8,8,16	6,2,2	8,8,5	18,17,12	76	76	0.000251718	0.00704568	0.571,0.8,0.889	0.308,0.32,0.294	0.446
ENSG00000088325	TPX2	20	+	30330343	30330450	30345209	30345385	30327073	30327424	30347859	30347982	9,4,10	49,73,60	96,171,72	289314305	76	76	0.00026429	0.00736199	0.155,0.052,0.143	0.249,0.353,0.191	-0.148
ENSG00000082701	GSK3B	3	-	119634890	119635021	119720892	119721086	119582265	119582452	119812193	119813264	23,18,24	2,0,3	86,83,100	0,0,0	76	76	0.000265792	0.0073684	0.92,1.0,0.889	1.0,1.0,1.0	-0.064
ENSG00000149480	MTA2	11	-	62367637	62367731	62368093	62368161	62365993	62366111	62368894	62368959	4,6,7	114134149	40,47,33	326378302	76	76	0.000298814	0.00824442	0.034,0.043,0.045	0.109,0.111,0.099	-0.066
ENSG00000063978	RNF4	4	+	2498733	2498848	2502385	2502465	2492063	2492229	2514164	2514324	5,2,1	0,1,0	75,58,57	0,0,0	76	76	0.000301644	0.00828305	1.0,0.667,1.0	1.0,1.0,1.0	-0.111
ENSG00000156976	EIF4A2	3	+	186502220	186502266	186502352	186502485	186501365	186501428	186503671	186504005	6,2,1	12,22,19	2,3,3	111,122,93	76	76	0.0003241	0.00885772	0.333,0.083,0.05	0.018,0.024,0.031	0.131
ENSG00000118515	SGK1	6	-	134493330	134493454	134493799	134493912	134492774	134492870	134494411	134494495	6,11,11	89,88,116	0,0,0	68,59,48	76	76	0.00033331	0.00905879	0.063,0.111,0.087	0.0,0.0,0.0	0.087
ENSG00000112715	VEGFA	6	+	43746196	43746273	43749747	43749824	43745205	43745402	43752277	43752299	45,63,49	12,5,19	47,57,66	38,34,36	54	54	0.000334584	0.00905879	0.789,0.926,0.721	0.553,0.626,0.647	0.203
ENSG00000068120	COASY	17	+	40717244	40717329	40717488	40717586	40716463	40716595	40717676	40717823	4,3,2	75,88,66	5,3,2	369455420	76	76	0.000336198	0.00906013	0.051,0.033,0.029	0.013,0.007,0.005	0.029
ENSG00000107951	MTPAP	10	-	30605046	30605139	30611319	30611546	30598729	30602900	30615352	30615564	4,2,4	1,2,2	20,24,23	0,0,0	76	76	0.000347992	0.00933456	0.8,0.5,0.667	1.0,1.0,1.0	-0.344
ENSG00000105793	GTPBP10	7	+	89984399	89984544	90001468	90001542	89982129	89982323	90003615	90003668	3,1,2	7,4,8	3,1,0	38,52,40	76	76	0.000362634	0.0096825	0.3,0.2,0.2	0.073,0.019,0.0	0.203
ENSG00000257076	NA	12	-	123707584	123707674	123712009	123712163	123705918	123706442	123714807	123715069	4,8,5	13,20,10	17,11,13	132105100	76	76	0.000381512	0.0100935	0.235,0.286,0.333	0.114,0.095,0.115	0.177
ENSG00000234741	GAS5	1	-	173834608	173834685	173835665	173835705	173833048	173833213	173835898	173835934	13,18,24	3,2,2	57,61,37	0,0,0	60	68	0.000380305	0.0100935	0.831,0.911,0.932	1.0,1.0,1.0	-0.109
ENSG00000087365	SF3B2	11	+	65828052	65828202	65829156	65829246	65827252	65827480	65829361	65829469	151161125	38,24,40	453374353	64,46,40	76	76	0.000424632	0.0111833	0.799,0.87,0.758	0.876,0.89,0.898	-0.079
ENSG00000151304	SRFBP1	5	+	121330293	121330365	121355782	121356497	121297655	121297763	121358064	121358102	1,0,3	3,6,5	1,1,0	60,41,52	70	70	0.000455284	0.0118306	0.25,0.0,0.375	0.016,0.024,0.0	0.195
ENSG00000153187	HNRNPU	1	-	245022030	245022143	245022576	245022676	245021312	245021576	245023636	245023776	402443412	117118149	151416161433	347332280	76	76	0.000455336	0.0118306	0.775,0.79,0.734	0.814,0.83,0.837	-0.061
ENSG00000135446	CDK4	12	-	58144705	58144873	58144989	58145125	58144438	58144548	58145282	58145519	46,62,55	181227190	179159124	362343347	76	76	0.000452838	0.0118306	0.203,0.215,0.224	0.331,0.317,0.263	-0.09
ENSG00000118515	SGK1	6	-	134495142	134495218	134495648	134495724	134494599	134494704	134498800	134498998	40,40,34	331638553646	25,27,21	109313231287	76	76	0.000469353	0.0120674	0.012,0.01,0.009	0.022,0.02,0.016	-0.009
ENSG00000158201	ABHD3	18	-	19244078	19244191	19263880	19263926	19239130	19239304	19282276	19282459	46,64,62	54,63,61	218186172	123122106	76	76	0.000471935	0.0120674	0.46,0.504,0.504	0.639,0.604,0.619	-0.131
ENSG00000085721	RRN3	16	-	15170414	15170507	15173854	15173953	15168579	15168718	15177369	15177439	0,1,1	8,6,11	2,1,0	161121129	76	76	0.000470016	0.0120674	0.0,0.143,0.083	0.012,0.008,0.0	0.069
ENSG00000173692	PSMD1	2	+	232028348	232028441	232029913	232030000	232026053	232026223	232030584	232030731	38,48,60	62,70,63	81,89,95	274219180	76	76	0.000472784	0.0120674	0.38,0.407,0.488	0.228,0.289,0.345	0.138
ENSG00000041357	PSMA4	15	+	78834824	78834987	78836531	78836609	78834518	78834561	78837210	78837299	268264317	332335277	362494454	710740705	75	75	0.000487917	0.0123449	0.447,0.441,0.534	0.338,0.4,0.392	0.097
ENSG00000145495	2017-03-06	5	+	10414544	10414614	10415599	10415781	10411444	10411649	10417381	10417516	11,13,17	73,69,84	22,29,26	326318268	76	76	0.000487408	0.0123449	0.131,0.159,0.168	0.063,0.084,0.088	0.074
ENSG00000166004	KIAA1731	11	+	93428662	93428839	93429485	93429583	93425092	93425196	93429847	93430141	3,3,4	14,14,15	119118109	125148137	76	76	0.000492555	0.0124081	0.176,0.176,0.211	0.488,0.444,0.443	-0.271
ENSG00000175029	CTBP2	10	-	126691906	126692061	126727565	126727724	126691528	126691673	126822080	126822181	0,0,3	9,8,14	1,0,0	78,98,86	76	76	0.000512987	0.0128669	0.0,0.0,0.176	0.013,0.0,0.0	0.054
ENSG00000196531	NACA	12	-	57108385	57108471	57118235	57118307	57107320	57107467	57118745	57119051	66,58,85	5,5,3	83,98,81	0,0,0	76	76	0.000524472	0.0130698	0.93,0.921,0.966	1.0,1.0,1.0	-0.061
ENSG00000109046	WSB1	17	+	25631805	25631937	25633807	25633908	25621156	25621461	25636125	25636298	2,6,1	3,1,0	0,0,0	19,16,15	76	76	0.000525588	0.0130698	0.4,0.857,1.0	0.0,0.0,0.0	0.752
ENSG00000151576	QTRTD1	3	+	113789472	113789685	113795589	113795789	113775628	113775711	113798752	113798904	6,7,10	4,3,5	2,0,0	6,3,11	76	76	0.000533726	0.0132154	0.6,0.7,0.667	0.25,0.0,0.0	0.572
ENSG00000163660	CCNL1	3	-	156870824	156870945	156874724	156874872	156869965	156870030	156876654	156876764	7,11,7	7,4,9	13,4,6	30,40,28	76	76	0.000540585	0.0133283	0.5,0.733,0.438	0.302,0.091,0.176	0.367
ENSG00000141543	EIF4A3	17	-	78109802	78109930	78111184	78111300	78109012	78109305	78111940	78112079	44,75,57	128115138	369255275	352383339	76	76	0.000575924	0.0141394	0.256,0.395,0.292	0.512,0.4,0.448	-0.139
ENSG00000153071	DAB2	5	-	39376751	39377384	39381555	39381718	39376098	39376208	39388406	39388469	1,0,0	8,9,11	0,1,0	229243216	76	76	0.000622458	0.0152174	0.111,0.0,0.0	0.0,0.004,0.0	0.036
ENSG00000096401	CDC5L	6	+	44394218	44394461	44397449	44397647	44392155	44392320	44413391	44413604	2,1,3	12,12,18	3,2,2	123,88,93	76	76	0.000627439	0.0152747	0.143,0.077,0.143	0.024,0.022,0.021	0.099
ENSG00000187109	NAP1L1	12	-	76453577	76453658	76453917	76454059	76449812	76449941	76461150	76461253	111101106	814957697	137,83,104	131912961111	76	76	0.00063448	0.0153236	0.12,0.095,0.132	0.094,0.06,0.086	0.036
ENSG00000075856	SART3	12	-	108932720	108932865	108936803	108936928	108931840	108931979	108938202	108938254	1,3,4	0,0,1	96,51,56	0,0,1	76	76	0.000637381	0.0153236	1.0,1.0,0.8	1.0,1.0,0.982	-0.061
ENSG00000104129	DNAJC17	15	-	41068739	41068825	41071281	41071508	41068393	41068490	41071742	41071801	2,1,4	1,2,2	3,8,3	33,36,44	76	76	0.000636483	0.0153236	0.667,0.333,0.667	0.083,0.182,0.064	0.446
ENSG00000234741	GAS5	1	-	173833812	173833842	173834366	173834420	173833394	173833442	173834608	173834685	12,20,14	8,5,5	49,33,46	0,3,6	76	48	0.000641504	0.015359	0.486,0.716,0.639	1.0,0.874,0.829	-0.287
ENSG00000131051	RBM39	20	-	34295041	34295123	34302106	34302311	34293146	34293252	34309661	34309799	0,3,2	33,71,48	0,0,0	751824659	76	76	0.000646975	0.0154262	0.0,0.041,0.04	0.0,0.0,0.0	0.027
ENSG00000113407	TARS	5	+	33455049	33455171	33455691	33455809	33448646	33448837	33456106	33456171	3,3,4	111129137	0,0,0	779606557	76	76	0.000672284	0.015964	0.026,0.023,0.028	0.0,0.0,0.0	0.026
ENSG00000163939	PBRM1	3	-	52675969	52676061	52677263	52677359	52668617	52668831	52678719	52678805	13,13,12	16,16,16	37,40,25	104,110,93	76	76	0.00068259	0.0161426	0.448,0.448,0.429	0.262,0.267,0.212	0.195
ENSG00000165732	DDX21	10	+	70721837	70721913	70726773	70726959	70719561	70720005	70728731	70728877	49,53,41	58,76,65	494390332	340301349	76	76	0.000707174	0.016656	0.458,0.411,0.387	0.592,0.564,0.488	-0.129
ENSG00000173545	ZNF622	5	-	16453121	16453265	16458625	16458738	16451627	16451893	16463216	16463379	38,45,55	60,69,83	63,67,84	57,58,69	76	76	0.000721743	0.0169303	0.388,0.395,0.399	0.525,0.536,0.549	-0.143
ENSG00000234741	GAS5	1	-	173834608	173834685	173835898	173835934	173833048	173833213	173836128	173836181	12,11,14	3,3,2	29,34,25	0,0,0	60	76	0.000729478	0.0170427	0.835,0.823,0.899	1.0,1.0,1.0	-0.148
ENSG00000075415	SLC25A3	12	+	98989210	98989439	98989504	98989626	98987756	98987913	98991633	98991813	9,11,17	578659647	4,7,4	956914746	76	76	0.000744733	0.0173292	0.015,0.016,0.026	0.004,0.008,0.005	0.013
ENSG00000114904	NEK4	3	-	52773444	52773650	52777367	52777477	52744799	52745885	52778254	52778321	1,5,7	1,0,0	11,18,10	2,0,0	76	76	0.000797894	0.018492	0.5,1.0,1.0	0.846,1.0,1.0	-0.115
ENSG00000106028	SSBP1	7	+	141438923	141438990	141441968	141442029	141438195	141438375	141443360	141443501	7,4,8	409452470	27,41,17	874780674	76	76	0.000829264	0.0191424	0.017,0.009,0.017	0.03,0.05,0.025	-0.021
ENSG00000164111	ANXA5	4	-	122604518	122604632	122607442	122607527	122602825	122602916	122617735	122617779	102,97,122	410438403	92,114,84	601517582	76	76	0.000855353	0.0196567	0.199,0.181,0.232	0.133,0.181,0.126	0.057
ENSG00000175029	CTBP2	10	-	126691906	126692061	126727565	126727724	126691528	126691673	126799558	126799662	0,0,2	10,8,14	0,0,0	78,101,86	76	76	0.000858328	0.0196567	0.0,0.0,0.125	0.0,0.0,0.0	0.042
ENSG00000103257	SLC7A5	16	-	87874655	87874761	87885329	87885455	87873307	87873431	87902490	87903125	35,39,59	2,4,1	90,147,66	0,0,0	76	76	0.000864799	0.019727	0.946,0.907,0.983	1.0,1.0,1.0	-0.055
ENSG00000079805	DNM2	19	+	10897239	10897382	10904395	10904531	10893635	10893796	10906047	10906115	39,28,46	29,30,35	156152165	215268238	76	76	0.00087224	0.0198187	0.574,0.483,0.568	0.42,0.362,0.409	0.145
ENSG00000114391	RPL24	3	-	101401614	101401751	101404661	101404772	101399939	101400059	101405325	101405401	10,8,16	55,79,65	19,15,7	32,33,23	76	76	0.000895506	0.0202678	0.154,0.092,0.198	0.373,0.313,0.233	-0.158
ENSG00000073712	FERMT2	14	-	53347961	53348187	53385840	53386074	53331464	53331571	53417129	53417286	16,29,17	0,0,3	130,112,99	0,0,0	76	76	0.000916817	0.0206694	1.0,1.0,0.85	1.0,1.0,1.0	-0.05
ENSG00000234741	GAS5	1	-	173834608	173834685	173835665	173835934	173833153	173833213	173836128	173836181	12,11,14	3,3,2	29,34,25	0,0,0	76	76	0.000925559	0.0207856	0.8,0.786,0.875	1.0,1.0,1.0	-0.18
ENSG00000166012	TAF1D	11	-	93463842	93463878	93466515	93466585	93463437	93463613	93467790	93467826	24,34,29	69,64,101	23,29,22	119150122	68	52	0.000976538	0.0218458	0.21,0.289,0.18	0.129,0.129,0.121	0.1
ENSG00000100644	HIF1A	14	+	62204804	62205091	62207472	62207906	62203606	62203827	62211422	62211531	94,120,96	69,66,65	793860782	424288307	76	76	0.00103986	0.0231728	0.577,0.645,0.596	0.652,0.749,0.718	-0.1
ENSG00000133316	WDR74	11	-	62601898	62601999	62602902	62603004	62601263	62601409	62603166	62603313	22,20,24	1,1,1	143166150	0,1,0	76	76	0.00106562	0.023656	0.957,0.952,0.96	1.0,0.994,1.0	-0.042
ENSG00000166012	TAF1D	11	-	93465409	93465457	93466515	93466585	93463437	93463613	93467790	93467826	24,34,29	6,7,12	23,29,22	0,1,1	68	68	0.00108035	0.0238915	0.8,0.829,0.707	1.0,0.967,0.957	-0.196
ENSG00000104129	DNAJC17	15	-	41068739	41068825	41071420	41071508	41068393	41068490	41071742	41071801	2,1,3	1,2,2	3,8,3	33,36,44	76	76	0.00112595	0.0248051	0.667,0.333,0.6	0.083,0.182,0.064	0.424
ENSG00000143621	ILF2	1	-	153635180	153635271	153635494	153635609	153634511	153635032	153635690	153635752	33,30,47	246347326	31,52,59	633648683	76	76	0.00114177	0.0250585	0.118,0.08,0.126	0.047,0.074,0.08	0.041
ENSG00000182718	ANXA2	15	-	60688478	60688626	60689456	60689537	60678226	60678285	60690141	60690185	202197247	0,1,0	227188191	3,10,4	76	76	0.00115461	0.0252445	1.0,0.995,1.0	0.987,0.949,0.979	0.027
ENSG00000169045	HNRNPH1	5	-	179047892	179048036	179048242	179048398	179045236	179045324	179050037	179050165	359434357	5,13,13	1100952795	8,19,5	76	76	0.00116522	0.0253808	0.986,0.971,0.965	0.993,0.98,0.994	-0.015
ENSG00000133706	LARS	5	-	145524225	145524272	145529184	145529262	145524034	145524100	145531424	145531470	150166121	7,13,10	355219294	9,8,6	76	76	0.00121553	0.0263774	0.955,0.927,0.924	0.975,0.965,0.98	-0.038
ENSG00000161057	PSMC2	7	+	103004589	103004754	103006522	103006610	103003790	103003886	103007859	103008062	1,0,3	34,43,44	0,0,0	189207191	76	76	0.0012298	0.0265876	0.029,0.0,0.064	0.0,0.0,0.0	0.031
ENSG00000115966	ATF2	2	-	175957788	175957995	175994865	175994935	175945387	175945493	176032777	176032897	3,1,6	1,4,5	0,0,0	18,17,20	76	76	0.00124041	0.0267171	0.75,0.2,0.545	0.0,0.0,0.0	0.498
ENSG00000166197	NOLC1	10	+	103916775	103916831	103917187	103917312	103912116	103912287	103917805	103917971	53,78,61	31,37,51	169185174	60,67,52	76	76	0.00128027	0.0274736	0.631,0.678,0.545	0.738,0.734,0.77	-0.129
ENSG00000163660	CCNL1	3	-	156867853	156867958	156869965	156870030	156867624	156867766	156870824	156870945	4,2,4	18,25,29	20,29,15	49,56,22	76	76	0.00128537	0.0274812	0.182,0.074,0.121	0.29,0.341,0.405	-0.22
ENSG00000177479	ARIH2	3	+	49019092	49019161	49020328	49020412	49017785	49017929	49020631	49021112	43,44,41	32,35,29	85107118	157142130	76	76	0.00130212	0.0277372	0.573,0.557,0.586	0.351,0.43,0.476	0.153
ENSG00000172572	PDE3A	12	+	20792779	20792891	20799423	20799537	20766376	20766634	20799684	20799884	0,1,1	19,18,23	0,0,0	332230204	76	76	0.00130903	0.0277821	0.0,0.053,0.042	0.0,0.0,0.0	0.032
ENSG00000149547	EI24	11	+	125448844	125448964	125452241	125452315	125448028	125448153	125453415	125453922	20,23,24	5,4,11	68,46,37	1,6,4	76	76	0.00132377	0.0278905	0.8,0.852,0.686	0.986,0.885,0.902	-0.145
ENSG00000113456	RAD1	5	-	34909362	34909461	34911658	34911917	34908276	34909053	34913574	34913683	0,4,4	12,6,3	10,3,5	124114105	76	76	0.00131923	0.0278905	0.0,0.4,0.571	0.075,0.026,0.045	0.275
ENSG00000186432	KPNA4	3	-	160253595	160253685	160254583	160254628	160249249	160249345	160283001	160283376	5,8,7	0,0,2	65,67,45	0,0,0	76	76	0.00134118	0.0281551	1.0,1.0,0.778	1.0,1.0,1.0	-0.074
ENSG00000255152	MSH5-SAPCD1	6	+	31710884	31710947	31711680	31711802	31710653	31710734	31711915	31712076	7,18,23	3,5,5	39,43,38	2,1,3	76	76	0.00135965	0.0284397	0.7,0.783,0.821	0.951,0.977,0.927	-0.184
ENSG00000213782	DDX47	12	+	12977473	12977611	12978933	12979004	12974898	12975017	12980179	12980309	0,2,0	14,15,19	0,0,0	93132116	76	76	0.00137495	0.0285535	0.0,0.118,0.0	0.0,0.0,0.0	0.039
ENSG00000213782	DDX47	12	+	12977473	12977611	12978933	12979004	12967064	12967158	12980179	12980309	0,2,0	13,16,19	0,0,0	93132116	76	76	0.00137097	0.0285535	0.0,0.111,0.0	0.0,0.0,0.0	0.037
ENSG00000119787	ATL2	2	-	38546026	38546161	38570409	38570654	38545676	38545781	38603257	38603366	0,1,1	5,6,6	0,0,0	50,59,38	76	76	0.00138551	0.0285682	0.0,0.143,0.143	0.0,0.0,0.0	0.095
ENSG00000130164	LDLR	19	+	11210898	11211021	11213339	11213462	11200137	11200291	11215895	11216276	7,10,9	5,6,4	33,61,36	87,82,73	76	76	0.00138184	0.0285682	0.583,0.625,0.692	0.275,0.427,0.33	0.289
ENSG00000149636	DSN1	20	-	35396371	35396445	35399275	35399427	35395171	35395244	35402064	35402173	0,0,1	3,4,5	0,0,0	58,46,66	76	76	0.00143299	0.0294423	0.0,0.0,0.167	0.0,0.0,0.0	0.056
ENSG00000170921	TANC2	17	+	61315174	61315438	61345108	61345234	61271351	61271500	61391748	61392030	2,1,3	2,3,2	1,0,1	16,16,18	76	76	0.00143853	0.0294517	0.5,0.25,0.6	0.059,0.0,0.053	0.413
ENSG00000128654	MTX2	2	+	177194097	177194154	177195311	177195388	177193601	177193640	177202220	177202358	0,3,2	24,25,20	0,0,0	59,88,64	71	71	0.00144498	0.0294796	0.0,0.107,0.091	0.0,0.0,0.0	0.066
ENSG00000075131	TIPIN	15	-	66633487	66633694	66641397	66641461	66629051	66629519	66641652	66641775	9,2,6	26,28,25	49,36,38	52,68,65	76	76	0.00150349	0.0304945	0.257,0.067,0.194	0.485,0.346,0.369	-0.227
ENSG00000165732	DDX21	10	+	70726773	70726959	70728731	70728877	70725132	70725250	70729956	70730106	69,86,88	33,44,49	399344340	299292300	76	76	0.00151016	0.0304945	0.676,0.662,0.642	0.572,0.541,0.531	0.112
ENSG00000234741	GAS5	1	-	173835314	173835344	173835665	173835705	173834366	173834420	173835898	173835934	14,19,23	2,2,3	57,61,37	0,1,0	60	40	0.00151052	0.0304945	0.824,0.864,0.836	1.0,0.976,1.0	-0.151
ENSG00000170445	HARS	5	-	140056911	140057005	140057239	140057338	140056573	140056701	140057492	140057600	39,53,35	4,3,10	165135147	8,8,3	76	76	0.00160004	0.0321897	0.907,0.946,0.778	0.954,0.944,0.98	-0.082
ENSG00000105793	GTPBP10	7	+	89984399	89984544	90003615	90003668	89983771	89983863	90012269	90012393	5,3,4	1,0,0	58,63,44	0,0,0	76	76	0.00161953	0.032469	0.833,1.0,1.0	1.0,1.0,1.0	-0.056
ENSG00000125733	TRIP10	19	+	6742977	6743125	6743204	6743267	6741235	6741292	6743504	6743609	9,8,11	2,3,2	81,59,82	78,82,74	76	76	0.00163904	0.0327469	0.818,0.727,0.846	0.509,0.418,0.526	0.313
ENSG00000148154	UGCG	9	+	114676884	114677026	114688663	114688776	114659480	114659593	114691779	114691946	1,4,1	11,6,11	11,14,5	3,4,6	76	76	0.00164826	0.0328179	0.083,0.4,0.083	0.786,0.778,0.455	-0.484
ENSG00000110851	PRDM4	12	-	108140051	108140201	108145191	108145986	108138319	108138438	108147700	108147886	18,14,19	0,2,0	26,47,34	12,13,16	76	76	0.00166153	0.0329689	1.0,0.875,1.0	0.684,0.783,0.68	0.243
ENSG00000111011	RSRC2	12	-	122995655	122995735	122999651	122999774	122992764	122992994	123001773	123001977	41,59,48	7,5,6	176189158	12,6,5	76	76	0.00174863	0.0345787	0.854,0.922,0.889	0.936,0.969,0.969	-0.07
ENSG00000101367	MAPRE1	20	+	31424439	31424647	31427540	31427662	31421522	31421668	31434423	31434576	55,83,59	25,19,26	176134181	37,31,20	76	76	0.00176201	0.0347247	0.687,0.814,0.694	0.826,0.812,0.9	-0.114
ENSG00000044574	HSPA5	9	-	128002450	128002588	128002954	128003186	128001699	128001812	128003283	128003609	53,50,59	54,42,51	67,105,70	112151103	76	76	0.00177574	0.0348767	0.495,0.543,0.536	0.374,0.41,0.405	0.128
ENSG00000189091	SF3B3	16	+	70594371	70594494	70597778	70597953	70590788	70590932	70598967	70599173	105112143	190204201	218250221	586556497	76	76	0.00179282	0.0350933	0.356,0.354,0.416	0.271,0.31,0.308	0.079
ENSG00000110756	HPS5	11	-	18306892	18307006	18308137	18308257	18305341	18305448	18309081	18309237	1,2,6	2,5,5	68,49,56	15,16,17	76	76	0.00182251	0.0354723	0.333,0.286,0.545	0.819,0.754,0.767	-0.392
ENSG00000117139	KDM5B	1	-	202729542	202729701	202742245	202742416	202725485	202725644	202743740	202743863	12,7,6	1,1,1	53,39,41	0,0,0	76	76	0.00182443	0.0354723	0.923,0.875,0.857	1.0,1.0,1.0	-0.115
ENSG00000078304	PPP2R5C	14	+	102375925	102376027	102378737	102378810	102372738	102372866	102391477	102394022	27,21,31	1,2,0	59,54,46	16,16,9	76	76	0.00191744	0.037156	0.964,0.913,1.0	0.787,0.771,0.836	0.161
ENSG00000175216	CKAP5	11	-	46774859	46775047	46776437	46776617	46772895	46773084	46780472	46780593	8,4,13	1,0,1	77,59,40	0,0,0	76	76	0.00197803	0.0382024	0.889,1.0,0.929	1.0,1.0,1.0	-0.061
ENSG00000213782	DDX47	12	+	12975594	12975666	12976136	12976253	12974898	12975017	12977473	12977611	3,3,8	3,2,1	32,31,21	1,1,1	76	76	0.00208444	0.0401237	0.5,0.6,0.889	0.97,0.969,0.955	-0.302
ENSG00000134077	THUMPD3	3	+	9424882	9424993	9425895	9426019	9416199	9416330	9426207	9428475	2,2,0	3,10,8	1,3,1	85,55,66	76	76	0.00229585	0.0440468	0.4,0.167,0.0	0.012,0.052,0.015	0.163
ENSG00000153922	CHD1	5	-	98193883	98194094	98194667	98194719	98191448	98192429	98195675	98195772	2,1,2	15,13,11	54,59,76	89109119	76	76	0.00232023	0.0443677	0.118,0.071,0.154	0.378,0.351,0.39	-0.259
ENSG00000109920	FNBP4	11	-	47767607	47767946	47772467	47772588	47755576	47755681	47772694	47772842	6,8,14	3,0,1	37,64,33	0,0,0	76	76	0.00235291	0.0448447	0.667,1.0,0.933	1.0,1.0,1.0	-0.133
ENSG00000153207	AHCTF1	1	-	247027225	247027418	247040459	247040604	247025260	247025455	247048794	247048982	5,13,4	3,0,0	49,59,40	0,0,0	76	76	0.00240721	0.0457292	0.625,1.0,1.0	1.0,1.0,1.0	-0.125
ENSG00000204256	BRD2	6	+	32944338	32944713	32945218	32945347	32943807	32943946	32945533	32945782	5,7,3	2,3,11	0,0,0	11,20,14	76	76	0.00243305	0.0459188	0.714,0.7,0.214	0.0,0.0,0.0	0.543
ENSG00000113407	TARS	5	+	33445429	33445510	33448646	33448837	33441151	33441249	33453393	33453517	153168178	188184168	824969708	650575643	76	76	0.00243256	0.0459188	0.449,0.477,0.514	0.559,0.628,0.524	-0.09
ENSG00000213782	DDX47	12	+	12976136	12977611	12978933	12979004	12974898	12975017	12980179	12980309	1,1,0	14,15,19	0,0,0	93132116	76	76	0.00246159	0.0460339	0.067,0.063,0.0	0.0,0.0,0.0	0.043
ENSG00000086061	DNAJA1	9	+	33026472	33026614	33026810	33026988	33025208	33025381	33029882	33029987	5,3,2	1,0,0	50,38,42	0,0,0	76	76	0.00245317	0.0460339	0.833,1.0,1.0	1.0,1.0,1.0	-0.056
ENSG00000160124	CCDC58	3	-	122081814	122081874	122087022	122087169	122078437	122078766	122090521	122090647	4,0,2	4,1,10	0,2,2	28,37,49	76	76	0.00246298	0.0460339	0.5,0.0,0.167	0.0,0.051,0.039	0.192
ENSG00000160633	SAFB	19	+	5626415	5626500	5641604	5641669	5623149	5623405	5645347	5645410	1,2,4	0,0,1	33,43,29	0,0,0	76	76	0.00247567	0.0461223	1.0,1.0,0.8	1.0,1.0,1.0	-0.067
ENSG00000073712	FERMT2	14	-	53345299	53345407	53347753	53347856	53340894	53340944	53347961	53348187	5,9,12	1,1,1	56,38,36	0,0,0	76	76	0.00248946	0.0462305	0.833,0.9,0.923	1.0,1.0,1.0	-0.115
ENSG00000141030	COPS3	17	-	17158172	17158259	17163614	17163788	17152239	17152353	17165279	17165420	44,39,47	60,45,46	88,94,110	205204164	76	76	0.00251927	0.0464862	0.423,0.464,0.505	0.3,0.315,0.401	0.125
ENSG00000234741	GAS5	1	-	173834608	173834685	173835665	173835705	173834366	173834420	173836128	173836181	2,4,0	12,22,12	0,0,0	49,33,46	68	76	0.00251287	0.0464862	0.157,0.169,0.0	0.0,0.0,0.0	0.109
ENSG00000130741	EIF2S3	X	+	24075749	24075871	24080532	24080691	24075537	24075665	24082317	24082452	658737755	12,11,15	877829720	42,30,13	76	76	0.00255059	0.0469147	0.982,0.985,0.981	0.954,0.965,0.982	0.016
ENSG00000161526	SAP30BP	17	+	73699887	73699939	73700835	73700894	73698559	73698651	73702087	73702172	0,2,0	5,7,3	0,1,3	71,90,65	76	76	0.00258622	0.0474195	0.0,0.222,0.0	0.0,0.011,0.044	0.056
ENSG00000182718	ANXA2	15	-	60688349	60688626	60689456	60689537	60678226	60678285	60690141	60690185	202197247	5,6,6	227188191	16,11,14	76	76	0.00260539	0.0476157	0.976,0.97,0.976	0.934,0.945,0.932	0.037
ENSG00000137074	APTX	9	-	32987541	32987729	32988080	32988127	32985968	32986028	32989756	32989893	11,11,7	8,10,10	67,57,48	17,24,19	76	76	0.00261336	0.0476157	0.579,0.524,0.412	0.798,0.704,0.716	-0.234
ENSG00000143228	NUF2	1	+	163313522	163313660	163317552	163317728	163310153	163310216	163318734	163318870	8,17,20	8,10,6	52,49,38	71,68,89	76	76	0.00271763	0.0493603	0.5,0.63,0.769	0.423,0.419,0.299	0.253
ENSG00000110321	EIF4G2	11	-	10820759	10820971	10821098	10821303	10820538	10820660	10821636	10821895	308420367	144168235	807773714	238309249	76	76	0.00273674	0.0495522	0.681,0.714,0.61	0.772,0.714,0.741	-0.074
ENSG00000169045	HNRNPH1	5	-	179046269	179046408	179047892	179048036	179045145	179045324	179048242	179048398	147205180	47,64,63	502378335	92,96,74	76	76	0.00286365	0.0516885	0.758,0.762,0.741	0.845,0.797,0.819	-0.067
ENSG00000119787	ATL2	2	-	38546026	38546161	38570409	38570654	38545676	38545781	38604284	38604415	1,4,3	5,6,6	5,6,5	52,61,39	76	76	0.00293779	0.0526871	0.167,0.4,0.333	0.088,0.09,0.114	0.203
ENSG00000166037	CEP57	11	+	95546631	95546753	95550950	95551067	95532395	95532552	95551990	95552068	1,0,0	6,1,6	1,0,0	63,66,51	76	76	0.00293519	0.0526871	0.143,0.0,0.0	0.016,0.0,0.0	0.042
ENSG00000150316	CWC15	11	-	94704140	94704229	94704538	94704651	94703152	94703260	94705218	94705357	16,7,16	10,8,13	84,96,84	162177150	76	76	0.00294626	0.0526871	0.615,0.467,0.552	0.341,0.352,0.359	0.194
ENSG00000149636	DSN1	20	-	35396371	35396445	35399275	35399380	35395171	35395244	35399827	35399876	0,0,1	3,4,5	1,0,0	59,49,65	76	76	0.0029689	0.0529286	0.0,0.0,0.167	0.017,0.0,0.0	0.05
ENSG00000082701	GSK3B	3	-	119666114	119666198	119720892	119721086	119582265	119582452	119812193	119812637	23,18,24	0,0,3	86,83,100	0,0,0	76	76	0.00306811	0.0545296	1.0,1.0,0.889	1.0,1.0,1.0	-0.037
ENSG00000101109	STK4	20	+	43615772	43615937	43623730	43623898	43610469	43610584	43625809	43625947	3,9,9	10,13,11	24,19,9	68,81,119	76	76	0.00309704	0.0548754	0.231,0.409,0.45	0.261,0.19,0.07	0.19
ENSG00000115392	FANCL	2	-	58390163	58390209	58390568	58390652	58388757	58388773	58392858	58393009	4,6,4	1,0,0	74,79,74	0,2,0	48	48	0.00316728	0.055638	0.8,1.0,1.0	1.0,0.975,1.0	-0.058
ENSG00000055044	NOP58	2	+	203142672	203142725	203147073	203147195	203139884	203139912	203149067	203149204	12,29,19	18,20,20	109,104,71	46,46,36	60	60	0.00315861	0.055638	0.4,0.592,0.487	0.703,0.693,0.664	-0.194
ENSG00000082153	BZW1	2	+	201680389	201680484	201681828	201681964	201680063	201680240	201682696	201682806	67,60,100	2,2,2	236198173	0,0,0	76	76	0.00316889	0.055638	0.971,0.968,0.98	1.0,1.0,1.0	-0.027
ENSG00000130741	EIF2S3	X	+	24078204	24078299	24080532	24080691	24075749	24075871	24082317	24082452	41,54,76	14,11,16	30,56,37	43,30,14	76	76	0.0031915	0.0558657	0.745,0.831,0.826	0.411,0.651,0.725	0.205
ENSG00000149187	CELF1	11	-	47508301	47508350	47510388	47510576	47505940	47506075	47574543	47574669	12,14,9	18,29,20	23,37,24	97133108	76	76	0.00320365	0.0559095	0.4,0.326,0.31	0.192,0.218,0.182	0.148
ENSG00000113460	BRIX1	5	+	34922799	34922873	34923237	34923339	34922321	34922392	34924951	34925080	0,1,4	61,68,68	0,0,0	657536448	76	76	0.00327248	0.0566905	0.0,0.014,0.056	0.0,0.0,0.0	0.023
ENSG00000178226	PRSS36	16	-	31151812	31152078	31152789	31152931	31151614	31151736	31153043	31153281	1,1,4	12,9,9	1,0,1	35,40,39	76	76	0.00325842	0.0566905	0.077,0.1,0.308	0.028,0.0,0.025	0.144
ENSG00000113282	CLINT1	5	-	157218710	157219003	157230657	157230727	157212750	157215000	157232873	157233120	6,1,5	3,1,3	31,16,27	2,2,3	76	76	0.00327776	0.0566905	0.667,0.5,0.625	0.939,0.889,0.9	-0.312
ENSG00000119414	PPP6C	9	-	127916184	127916264	127933363	127933459	127908851	127912200	127951922	127952097	31,26,28	2,2,1	72,94,97	0,0,1	76	76	0.00328786	0.056696	0.939,0.929,0.966	1.0,1.0,0.99	-0.052
ENSG00000130559	CAMSAP1	9	-	138758301	138758382	138773478	138773640	138754312	138754454	138774661	138774924	10,9,15	4,1,3	25,29,20	30,19,25	76	76	0.00330708	0.0567956	0.714,0.9,0.833	0.455,0.604,0.444	0.315
ENSG00000149100	EIF3M	11	+	32608557	32608690	32610139	32610278	32605343	32605475	32611092	32611187	16,22,18	1,2,0	86,83,61	0,0,0	76	76	0.00331324	0.0567956	0.941,0.917,1.0	1.0,1.0,1.0	-0.047
ENSG00000131051	RBM39	20	-	34317233	34317287	34317383	34317473	34313045	34313077	34319862	34320057	2,0,1	13,23,26	4,8,3	403352309	64	64	0.00336111	0.0574462	0.133,0.0,0.037	0.01,0.022,0.01	0.043
ENSG00000064205	WISP2	20	+	43348537	43348754	43353378	43353633	43343885	43344091	43355727	43356452	29,36,33	70,69,53	78,97,91	84123104	76	76	0.00350486	0.059727	0.293,0.343,0.384	0.481,0.441,0.467	-0.123
ENSG00000183597	C22orf25	22	+	20043465	20043536	20049052	20049206	20039987	20040107	20050860	20050965	2,1,0	3,6,7	8,10,4	4,4,1	76	76	0.00368016	0.0625303	0.4,0.143,0.0	0.667,0.714,0.8	-0.546
ENSG00000255717	SNHG1	11	-	62621272	62621305	62621489	62621536	62621023	62621062	62621990	62622023	13,8,21	42,43,55	116,94,111	214194160	60	38	0.0036997	0.0626786	0.164,0.105,0.195	0.256,0.235,0.305	-0.111
ENSG00000113649	TCERG1	5	+	145843113	145843356	145849106	145849307	145834618	145834844	145850198	145850311	5,1,2	106108103	0,0,0	203187224	76	76	0.00373111	0.0629163	0.045,0.009,0.019	0.0,0.0,0.0	0.024
ENSG00000132646	PCNA	20	-	5099255	5099323	5099414	5099512	5098115	5098310	5100223	5100672	39,34,48	45,50,57	252303320	265183196	76	76	0.00374631	0.0629163	0.464,0.405,0.457	0.487,0.623,0.62	-0.135
ENSG00000143337	TOR1AIP1	1	+	179870436	179870523	179873100	179873157	179869260	179869302	179876957	179876999	6,8,9	13,24,15	63,53,53	62,36,57	72	72	0.00374254	0.0629163	0.316,0.25,0.375	0.504,0.596,0.482	-0.214
ENSG00000146457	WTAP	6	+	160157289	160157327	160163119	160163178	160148619	160148735	160164696	160164824	0,1,3	1,3,6	2,3,1	50,42,35	64	76	0.00375789	0.0629284	0.0,0.284,0.373	0.045,0.078,0.033	0.167
ENSG00000234741	GAS5	1	-	173834647	173834685	173835665	173835705	173834366	173834420	173836128	173836181	2,4,0	40,55,47	0,0,0	87100103	68	64	0.00377849	0.0630909	0.045,0.064,0.0	0.0,0.0,0.0	0.036
ENSG00000080345	RIF1	2	+	152324513	152324660	152325154	152325270	152321213	152322634	152326224	152326378	2,4,8	4,17,13	24,22,19	149148136	76	76	0.00385432	0.0641723	0.333,0.19,0.381	0.139,0.129,0.123	0.171
ENSG00000255717	SNHG1	11	-	62621023	62621062	62621272	62621305	62619729	62620153	62621489	62621536	0,2,1	1,1,1	20,28,12	0,0,0	54	66	0.00394985	0.0655743	0.0,0.71,0.55	1.0,1.0,1.0	-0.58
ENSG00000189091	SF3B3	16	+	70597778	70597953	70601313	70601439	70590788	70590932	70602185	70602398	2,4,5	162161194	0,0,0	315314308	76	76	0.00398205	0.06592	0.012,0.024,0.025	0.0,0.0,0.0	0.02
ENSG00000119812	FAM98A	2	-	33810596	33810764	33811628	33811745	33808728	33810511	33812306	33812387	6,8,5	3,17,14	73,89,63	38,30,25	76	76	0.00399711	0.0659808	0.667,0.32,0.263	0.658,0.748,0.716	-0.291
ENSG00000050748	MAPK9	5	-	179674438	179674510	179674854	179674926	179669572	179669755	179675972	179676138	3,1,6	55,90,71	0,1,1	145,120,97	76	76	0.00406322	0.0668815	0.052,0.011,0.078	0.0,0.008,0.01	0.041
ENSG00000156976	EIF4A2	3	+	186503952	186504062	186504915	186505053	186503750	186503840	186505283	186506157	73,50,67	138123149	151,93,115	427388323	76	76	0.00419018	0.0685817	0.346,0.289,0.31	0.261,0.193,0.263	0.076
ENSG00000097021	ACOT7	1	-	6341161	6341346	6354923	6355040	6324332	6324755	6378551	6378638	13,15,9	34,57,31	33,36,30	55,57,48	76	76	0.00418845	0.0685817	0.277,0.208,0.225	0.375,0.387,0.385	-0.146
ENSG00000110955	ATP5B	12	-	57038564	57038739	57038954	57039137	57037186	57037371	57039620	57039751	458569623	20,27,36	331707484	16,11,13	76	76	0.00431516	0.0704282	0.958,0.955,0.945	0.954,0.985,0.974	-0.018
ENSG00000086589	RBM22	5	-	150076094	150076267	150076352	150076453	150075067	150075268	150078060	150078193	7,5,4	16,16,27	12,12,6	69128103	76	76	0.00436736	0.07108	0.304,0.238,0.129	0.148,0.086,0.055	0.127
ENSG00000162851	TFB2M	1	-	246714514	246714604	246719874	246720023	246711846	246711909	246727647	246727736	0,1,0	2,1,2	1,0,1	51,45,45	76	76	0.00452064	0.0733686	0.0,0.5,0.0	0.019,0.0,0.022	0.153
ENSG00000143458	GABPB2	1	+	151060945	151060993	151062881	151063049	151060665	151060773	151065667	151065862	0,0,3	2,6,4	1,0,0	38,36,34	76	76	0.00456429	0.0738701	0.0,0.0,0.429	0.026,0.0,0.0	0.134
ENSG00000100462	PRMT5	14	-	23396734	23396823	23397334	23397420	23393478	23393601	23397705	23397824	27,16,31	5,4,1	126,85,92	7,2,3	76	76	0.0046067	0.0743488	0.844,0.8,0.969	0.947,0.977,0.968	-0.093
ENSG00000156976	EIF4A2	3	+	186502217	186502266	186502352	186502485	186501365	186501428	186503671	186503840	2,1,1	12,22,19	2,2,1	111,122,93	76	76	0.00469522	0.0754357	0.143,0.043,0.05	0.018,0.016,0.011	0.064
ENSG00000106723	SPIN1	9	+	91041296	91041506	91083286	91083520	91003333	91003453	91089992	91093609	2,4,1	58,65,49	3,1,0	190171158	76	76	0.00470008	0.0754357	0.033,0.058,0.02	0.016,0.006,0.0	0.03
ENSG00000144635	DYNC1LI1	3	-	32571952	32572012	32574477	32574589	32571031	32571152	32576002	32576138	1,2,4	0,0,1	53,25,32	0,1,0	76	76	0.00474045	0.0758734	1.0,1.0,0.8	1.0,0.962,1.0	-0.054
ENSG00000113407	TARS	5	+	33448646	33448837	33453393	33453517	33446749	33446870	33455049	33455171	2,1,4	90104116	2,1,1	549443425	76	76	0.004779	0.0762796	0.022,0.01,0.033	0.004,0.002,0.002	0.019
ENSG00000176393	RNPEP	1	+	201965274	201965391	201966446	201966682	201958510	201958659	201969029	201969143	41,52,47	83,94,79	36,48,48	169133110	76	76	0.00481035	0.0763684	0.331,0.356,0.373	0.176,0.265,0.304	0.105
ENSG00000100401	RANGAP1	22	-	41664100	41664160	41670603	41670731	41657449	41657584	41676936	41677086	10,13,9	0,2,1	120116114	3,3,2	76	76	0.00481092	0.0763684	1.0,0.867,0.9	0.976,0.975,0.983	-0.056
ENSG00000119392	GLE1	9	+	131277807	131277918	131284946	131285095	131267009	131267183	131285558	131285619	0,1,1	12,10,11	0,1,0	70,87,62	76	76	0.00486857	0.0770724	0.0,0.091,0.083	0.0,0.011,0.0	0.054
ENSG00000108846	ABCC3	17	+	48734062	48734188	48735442	48735568	48712217	48712342	48735795	48735857	3,0,0	9,14,8	0,0,0	58,51,37	76	76	0.00492031	0.0774681	0.25,0.0,0.0	0.0,0.0,0.0	0.083
ENSG00000143569	UBAP2L	1	+	154207066	154207268	154207671	154207767	154201090	154201201	154209041	154209087	9,21,22	10,18,18	218221182	117,93,81	76	76	0.00491709	0.0774681	0.474,0.538,0.55	0.651,0.704,0.692	-0.162
ENSG00000169727	GPS1	17	+	80014504	80014642	80014715	80014850	80014345	80014426	80014928	80015346	45,45,48	12,14,20	82,56,83	63,36,42	76	76	0.0050482	0.0792663	0.789,0.763,0.706	0.566,0.609,0.664	0.14
ENSG00000069345	DNAJA2	16	-	47005260	47005484	47005807	47005867	47001995	47002076	47007405	47007625	3,12,9	32,37,26	167146128	259273234	76	76	0.00507168	0.0794198	0.086,0.245,0.257	0.392,0.348,0.354	-0.169
ENSG00000163399	ATP1A1	1	+	116929909	116930113	116930752	116930866	116927404	116927464	116931259	116931394	4,10,12	197201163	3,10,4	331302287	76	76	0.00514996	0.0804283	0.02,0.047,0.069	0.009,0.032,0.014	0.027
ENSG00000234741	GAS5	1	-	173835314	173835344	173835665	173835705	173834996	173835032	173835898	173835934	13,19,23	2,7,12	57,61,37	5,7,5	52	32	0.00521979	0.0812996	0.8,0.626,0.541	0.875,0.843,0.82	-0.19
ENSG00000163904	SENP2	3	+	185332351	185332528	185335267	185335399	185331132	185331196	185337086	185337290	3,3,3	11,12,18	37,30,36	57,45,43	76	76	0.00532286	0.0826827	0.214,0.2,0.143	0.394,0.4,0.456	-0.231
ENSG00000124155	PIGT	20	+	44050022	44050223	44052855	44053021	44049167	44049333	44054213	44054884	86,92,114	9,6,7	111113112	2,4,1	76	76	0.00534857	0.08286	0.905,0.939,0.942	0.982,0.966,0.991	-0.051
ENSG00000049656	CLPTM1L	5	-	1323901	1323984	1324877	1324928	1322948	1323026	1325865	1325931	381479384	335339339	777722574	497393393	76	76	0.00539168	0.0833051	0.532,0.586,0.531	0.61,0.648,0.594	-0.068
ENSG00000167670	CHAF1A	19	+	4408899	4409756	4418016	4418073	4402659	4402811	4422562	4422792	0,1,1	1,3,1	2,6,1	57,68,43	76	76	0.00550984	0.0849043	0.0,0.25,0.5	0.034,0.081,0.023	0.204
ENSG00000132199	ENOSF1	18	-	675320	675402	677344	677444	673858	674406	677742	677872	67,66,60	33,51,69	68,68,78	102,107,94	76	76	0.00562044	0.0863788	0.67,0.564,0.465	0.4,0.389,0.453	0.152
ENSG00000140612	SEC11A	15	-	85223943	85224063	85230855	85231005	85213955	85214013	85234765	85234875	190175202	52,37,55	456484431	81,71,82	76	76	0.00564354	0.0865044	0.785,0.825,0.786	0.849,0.872,0.84	-0.055
ENSG00000168411	RFWD3	16	-	74683029	74683100	74685817	74686020	74678438	74678633	74694829	74695349	2,6,6	3,2,11	32,14,23	118,88,92	76	76	0.00567278	0.0867232	0.4,0.75,0.353	0.213,0.137,0.2	0.318
ENSG00000234741	GAS5	1	-	173835898	173835934	173836128	173836181	173835353	173835705	173837097	173837125	1,3,0	14,18,23	0,0,0	57,61,37	60	44	0.00570901	0.0870474	0.05,0.109,0.0	0.0,0.0,0.0	0.053
ENSG00000152359	POC5	5	-	75001528	75001612	75003561	75003700	74998429	74998635	75008678	75008776	1,2,1	1,0,2	1,4,0	19,28,20	76	76	0.00577182	0.0877741	0.5,1.0,0.333	0.05,0.125,0.0	0.553
ENSG00000070756	PABPC1	8	-	101724879	101725017	101725314	101725409	101724589	101724685	101727689	101727829	659779727	17,20,24	937903897	18,13,10	76	76	0.00582019	0.0880924	0.975,0.975,0.968	0.981,0.986,0.989	-0.013
ENSG00000173120	KDM2A	11	+	66949316	66949363	66974980	66975159	66947549	66947688	66982810	66982917	0,1,1	2,6,7	0,0,1	37,45,32	76	76	0.00582316	0.0880924	0.0,0.143,0.125	0.0,0.0,0.03	0.079
ENSG00000152795	HNRPDL	4	-	83348585	83348717	83349170	83349332	83348342	83348457	83349430	83349599	145190174	83,51,88	305321294	168242233	76	76	0.00593707	0.0895817	0.636,0.788,0.664	0.645,0.57,0.558	0.105
ENSG00000148300	REXO4	9	-	136276104	136276193	136277418	136277612	136273891	136273966	136277897	136278041	4,8,2	7,8,12	42,48,35	237276240	76	76	0.00605357	0.0911023	0.364,0.5,0.143	0.151,0.148,0.127	0.194
ENSG00000184216	IRAK1	X	-	153279492	153279729	153281482	153281548	153278493	153278884	153281887	153282095	47,60,58	44,60,63	182196141	92110121	76	76	0.00614949	0.092306	0.516,0.5,0.479	0.664,0.641,0.538	-0.116
ENSG00000011007	TCEB3	1	+	24082763	24082875	24083442	24083615	24082332	24082513	24086001	24088549	5,4,3	8,8,14	22,26,19	13,13,20	76	76	0.00617587	0.0924625	0.385,0.333,0.176	0.629,0.667,0.487	-0.296
ENSG00000234741	GAS5	1	-	173833621	173833842	173834366	173834420	173833394	173833442	173834608	173834685	12,20,14	12,12,12	49,33,46	15,8,20	76	76	0.00637824	0.0952462	0.5,0.625,0.538	0.766,0.805,0.697	-0.202
ENSG00000132199	ENOSF1	18	-	677742	677872	678695	678737	677344	677444	683245	683380	25,30,25	68,66,60	56,46,49	70,69,78	72	76	0.00642528	0.095702	0.28,0.324,0.305	0.458,0.413,0.399	-0.12
ENSG00000008083	JARID2	6	+	15487537	15487773	15496362	15497401	15468772	15468949	15501137	15501640	3,5,2	4,3,6	48,32,39	13,9,13	76	76	0.00656074	0.097469	0.429,0.625,0.25	0.787,0.78,0.75	-0.338
ENSG00000009335	UBE3C	7	+	157009560	157009665	157013382	157013470	157000396	157000629	157015947	157016045	28,21,33	9,23,19	98,126,91	23,30,30	76	76	0.00665036	0.0985477	0.757,0.477,0.635	0.81,0.808,0.752	-0.167
ENSG00000168066	SF1	11	-	64536897	64537081	64537435	64537525	64536694	64536810	64537727	64537880	18,34,39	59,74,80	99,88,93	134154117	76	76	0.00668901	0.0988677	0.234,0.315,0.328	0.425,0.364,0.443	-0.118
ENSG00000107554	DNMBP	10	-	101659675	101659823	101667751	101667851	101657813	101658042	101668709	101668903	4,0,4	1,2,5	19,26,18	0,0,1	76	76	0.00682605	0.100381	0.8,0.0,0.444	1.0,1.0,0.947	-0.568
ENSG00000163660	CCNL1	3	-	156867853	156867958	156877193	156877268	156867624	156867766	156877580	156878002	81106106	19,24,29	99,65,80	49,56,22	76	76	0.00681105	0.100381	0.81,0.815,0.785	0.669,0.537,0.784	0.14
ENSG00000009954	BAZ1B	7	-	72873865	72874048	72877251	72877429	72865176	72865324	72879768	72879867	8,7,12	16,15,16	32,31,21	120,103,90	76	76	0.00695079	0.101957	0.333,0.318,0.429	0.211,0.231,0.189	0.15
ENSG00000170802	FOXN2	2	+	48586185	48586286	48600430	48600499	48573339	48573890	48602058	48606433	0,1,1	3,2,5	11,7,3	3,1,2	76	76	0.00703076	0.102869	0.0,0.333,0.167	0.786,0.875,0.6	-0.587
ENSG00000119725	ZNF410	14	+	74376043	74376133	74387682	74387808	74371604	74371786	74390097	74390225	2,0,2	3,4,6	22,25,18	17,7,5	76	76	0.00718951	0.104927	0.4,0.0,0.25	0.564,0.781,0.783	-0.493
ENSG00000234741	GAS5	1	-	173835314	173835344	173835665	173835705	173833394	173833442	173835898	173835934	15,18,23	2,2,2	57,61,38	0,2,0	60	40	0.00720828	0.104937	0.833,0.857,0.885	1.0,0.953,1.0	-0.126
ENSG00000105379	ETFB	19	-	51853582	51853645	51856385	51856544	51850153	51850312	51857403	51857562	15,26,27	44,33,40	25,21,22	61,98,87	76	76	0.00726166	0.105449	0.254,0.441,0.403	0.291,0.176,0.202	0.143
ENSG00000122034	GTF3A	13	+	28006867	28006941	28008275	28008356	28004669	28004758	28008941	28009171	131166153	141128129	112160202	181192223	76	76	0.00730199	0.105506	0.482,0.565,0.543	0.382,0.455,0.475	0.093
ENSG00000090621	PABPC4	1	-	40027744	40027875	40027994	40028088	40026487	40026794	40029285	40029413	13,26,24	3,9,9	15,30,24	2,0,3	76	76	0.00728588	0.105506	0.813,0.743,0.727	0.882,1.0,0.889	-0.163
ENSG00000196419	XRCC6	22	+	42052906	42053036	42054255	42054356	42049532	42049694	42057334	42057448	28,32,28	40,51,46	84,29,37	48,34,34	76	76	0.00735742	0.106042	0.412,0.386,0.378	0.636,0.46,0.521	-0.147
ENSG00000234741	GAS5	1	-	173835665	173835705	173835898	173835934	173834366	173834420	173836128	173836181	13,11,13	2,4,0	30,34,25	0,0,0	60	68	0.00738891	0.106232	0.88,0.757,1.0	1.0,1.0,1.0	-0.121
ENSG00000213782	DDX47	12	+	12974898	12975017	12977473	12977611	12967064	12967158	12978933	12979004	1,0,2	13,9,13	0,0,0	53,35,44	76	76	0.00741539	0.106281	0.071,0.0,0.133	0.0,0.0,0.0	0.068
ENSG00000168066	SF1	11	-	64534371	64534551	64534663	64534723	64533075	64533627	64535038	64535089	2,1,1	10,5,8	1,2,1	38,49,40	76	76	0.00744739	0.106281	0.167,0.167,0.111	0.026,0.039,0.024	0.119
ENSG00000108055	SMC3	10	+	112335093	112335161	112337178	112337250	112328695	112328771	112337592	112337672	0,0,2	3,3,4	0,1,1	43,42,27	76	76	0.00743311	0.106281	0.0,0.0,0.333	0.0,0.023,0.036	0.091
ENSG00000138592	USP8	15	+	50751196	50751359	50754476	50754519	50741596	50741682	50763829	50763992	8,8,9	0,0,1	71,62,49	0,0,0	76	74	0.00751151	0.106933	1.0,1.0,0.898	1.0,1.0,1.0	-0.034
ENSG00000146731	CCT6A	7	+	56128499	56128633	56129439	56129542	56127961	56128109	56130375	56130448	241218322	531608509	385447409	119512591207	76	76	0.00757733	0.107426	0.312,0.264,0.387	0.244,0.262,0.253	0.068
ENSG00000140474	ULK3	15	-	75130492	75130533	75130606	75130685	75130091	75130139	75130780	75130845	1,3,4	8,12,7	44,59,35	41,51,33	76	70	0.00758324	0.107426	0.103,0.187,0.345	0.497,0.516,0.494	-0.291
ENSG00000174891	RSRC1	3	+	158072645	158072697	158178723	158178792	157920860	157921034	158254880	158254987	1,1,2	3,12,4	1,0,0	44,14,22	76	76	0.00767727	0.108474	0.25,0.077,0.333	0.022,0.0,0.0	0.213
ENSG00000234741	GAS5	1	-	173834647	173834685	173835665	173835705	173833038	173833442	173835898	173835934	15,18,23	0,2,2	57,61,38	0,0,0	60	56	0.00769468	0.108474	1.0,0.894,0.915	1.0,1.0,1.0	-0.064
ENSG00000187741	FANCA	16	-	89877114	89877210	89877336	89877479	89874701	89874775	89880927	89881021	7,8,3	15,16,11	19,11,8	69,90,62	76	76	0.00771908	0.108554	0.318,0.333,0.214	0.216,0.109,0.114	0.142
ENSG00000117335	CD46	1	+	207941123	207941168	207943665	207943707	207940357	207940540	207956636	207956675	26,43,34	146166156	87,88,85	627584551	71	67	0.00776541	0.108941	0.144,0.196,0.171	0.116,0.124,0.127	0.048
ENSG00000126883	NUP214	9	+	134064439	134064518	134070619	134070681	134053697	134053797	134072602	134074402	0,0,1	8,3,4	0,0,0	32,48,50	76	76	0.00781083	0.109314	0.0,0.0,0.2	0.0,0.0,0.0	0.067
ENSG00000215386	LINC00478	21	+	17763933	17764005	17859809	17859858	17603375	17603435	17909698	17909759	3,1,5	6,7,3	2,5,4	52,36,24	76	76	0.00786384	0.109791	0.333,0.125,0.625	0.037,0.122,0.143	0.26
ENSG00000067167	TRAM1	8	-	71495398	71495559	71495884	71496028	71487086	71487240	71499129	71499234	167185160	79,78,73	383248272	79,104,84	76	76	0.00792444	0.110371	0.679,0.703,0.687	0.829,0.705,0.764	-0.076
ENSG00000107643	MAPK8	10	+	49632130	49632202	49632556	49632628	49628197	49628363	49633930	49634113	1,2,1	1,2,7	1,3,2	39,24,33	76	76	0.00804714	0.111811	0.5,0.5,0.125	0.025,0.111,0.057	0.311
ENSG00000105669	COPE	19	-	19017768	19017921	19021779	19021880	19016384	19016438	19023792	19023855	28,33,43	41,41,44	64,48,53	30,44,35	76	76	0.00808776	0.112106	0.406,0.446,0.494	0.681,0.522,0.602	-0.153
ENSG00000134152	C15orf29	15	-	34444990	34445270	34446844	34446885	34440832	34440951	34455760	34455891	2,3,5	1,0,0	31,35,43	0,0,0	70	76	0.00824727	0.113503	0.685,1.0,1.0	1.0,1.0,1.0	-0.105
ENSG00000214719	LRRC37BP1	17	+	28937906	28937960	28958772	28958945	28935447	28935580	28960115	28960408	4,7,8	0,1,0	49,35,60	0,0,0	76	76	0.0082383	0.113503	1.0,0.875,1.0	1.0,1.0,1.0	-0.042
ENSG00000214719	LRRC37BP1	17	+	28937906	28937960	28958772	28958913	28935447	28935580	28960115	28960408	4,7,8	0,1,0	49,35,60	0,0,0	76	76	0.0082383	0.113503	1.0,0.875,1.0	1.0,1.0,1.0	-0.042
ENSG00000189308	LIN54	4	-	83861041	83861115	83891479	83891618	83860691	83860889	83900035	83900159	1,0,1	2,6,3	0,0,0	19,25,26	76	76	0.00839098	0.115207	0.333,0.0,0.25	0.0,0.0,0.0	0.194
ENSG00000146457	WTAP	6	+	160160021	160160077	160163119	160163178	160146616	160148365	160164696	160164824	0,0,3	3,2,6	4,0,1	50,42,35	76	76	0.00842055	0.11534	0.0,0.0,0.333	0.074,0.0,0.028	0.077
ENSG00000034677	RNF19A	8	-	101282096	101282241	101287180	101287389	101281012	101281175	101299728	101300495	0,3,0	6,3,7	6,4,1	120,102,94	76	76	0.00888978	0.12148	0.0,0.5,0.0	0.048,0.038,0.011	0.134
ENSG00000065978	YBX1	1	+	43161869	43161959	43162312	43162615	43159160	43159194	43162850	43162933	4,0,0	4,5,7	4,5,2	0,0,1	66	66	0.00904442	0.123302	0.5,0.0,0.0	1.0,1.0,0.667	-0.722
ENSG00000082898	XPO1	2	-	61752626	61753656	61760906	61761038	61749745	61749818	61764696	61765366	41,57,53	2,1,2	601608472	8,7,6	76	76	0.00906652	0.123313	0.953,0.983,0.964	0.987,0.989,0.987	-0.021
ENSG00000072274	TFRC	3	-	195796325	195796439	195798266	195798369	195794902	195795001	195798873	195799023	9351021978	21,36,59	287222062020	81,63,46	76	76	0.00921705	0.124792	0.978,0.966,0.943	0.973,0.972,0.978	-0.012
ENSG00000149636	DSN1	20	-	35396371	35396445	35399275	35399596	35395171	35395244	35402064	35402184	0,0,1	3,4,5	1,1,1	58,46,66	76	76	0.0092183	0.124792	0.0,0.0,0.167	0.017,0.021,0.015	0.038
ENSG00000119969	HELLS	10	+	96333716	96333944	96334310	96334493	96322568	96322633	96336418	96336562	0,1,2	32,35,39	1,0,0	138162137	76	76	0.00948488	0.128101	0.0,0.028,0.049	0.007,0.0,0.0	0.023
ENSG00000126858	RHOT1	17	+	30529788	30529919	30530908	30530992	30527974	30528075	30533928	30534048	5,2,6	4,2,4	60,53,53	27,7,8	76	76	0.00971235	0.130582	0.556,0.5,0.6	0.69,0.883,0.869	-0.262
ENSG00000082701	GSK3B	3	-	119642219	119642330	119720892	119721086	119582265	119582452	119812193	119812637	23,18,24	0,2,0	86,83,100	0,0,0	76	76	0.00971362	0.130582	1.0,0.9,1.0	1.0,1.0,1.0	-0.033
ENSG00000106615	RHEB	7	-	151167656	151167738	151188028	151188100	151163097	151164297	151216545	151217010	5,1,0	88,117,87	0,0,0	292261224	76	76	0.00974101	0.130647	0.054,0.008,0.0	0.0,0.0,0.0	0.021
ENSG00000023839	ABCC2	10	+	101577064	101577241	101578546	101578714	101572774	101572901	101578845	101579026	41,35,39	8,10,7	122130111	58,48,52	76	76	0.00991963	0.132735	0.837,0.778,0.848	0.678,0.73,0.681	0.125
ENSG00000104164	PLDN	15	+	45884332	45884474	45897625	45897712	45879416	45879723	45898592	45901909	13,16,13	6,10,7	58,60,60	65,76,69	76	76	0.00996867	0.133084	0.684,0.615,0.65	0.472,0.441,0.465	0.19
ENSG00000006007	GDE1	16	-	19516202	19516414	19519008	19519101	19513014	19514939	19522160	19522266	11,12,23	18,35,28	40,28,33	37,23,24	76	76	0.0100044	0.133253	0.379,0.255,0.451	0.519,0.549,0.579	-0.187
ENSG00000172572	PDE3A	12	+	20782841	20783061	20786626	20786712	20774229	20774345	20787835	20787990	37,39,28	9,8,11	105179196	90,86,89	76	76	0.0101021	0.134247	0.804,0.83,0.718	0.538,0.675,0.688	0.15
ENSG00000005889	ZFX	X	+	24225828	24225972	24227016	24227157	24197299	24197887	24228309	24234372	2,2,0	16,16,23	0,0,0	47,41,57	76	76	0.0101297	0.134306	0.111,0.111,0.0	0.0,0.0,0.0	0.074
ENSG00000147421	HMBOX1	8	+	28827559	28828036	28866588	28866699	28747910	28748195	28876276	28876430	0,1,2	4,5,6	0,0,0	16,29,16	76	76	0.0103768	0.137154	0.0,0.167,0.25	0.0,0.0,0.0	0.139
ENSG00000120253	NUP43	6	-	150057606	150057758	150059778	150059914	150052748	150052871	150063525	150063706	11,7,18	26,21,15	25,22,16	81,107,83	76	76	0.0103919	0.137154	0.297,0.25,0.545	0.236,0.171,0.162	0.174
ENSG00000120438	TCP1	6	-	160204972	160205099	160206931	160207029	160201966	160202142	160208774	160208903	209232203	2,2,8	522366364	1,0,1	76	76	0.0104671	0.137833	0.991,0.991,0.962	0.998,1.0,0.997	-0.017
ENSG00000118200	CAMSAP2	1	+	200816337	200816420	200817159	200819362	200811121	200811215	200821668	200821805	0,0,1	2,3,3	0,0,1	24,45,31	76	76	0.0105512	0.138626	0.0,0.0,0.25	0.0,0.0,0.031	0.073
ENSG00000136522	MRPL47	3	-	179311552	179311683	179316462	179316559	179306072	179306783	179319517	179319578	8,16,17	16,13,6	63,64,55	16,12,23	76	76	0.0107066	0.140138	0.333,0.552,0.739	0.797,0.842,0.705	-0.24
ENSG00000087470	DNM1L	12	+	32890798	32890876	32891197	32891230	32890038	32890095	32892997	32893174	3,7,2	14,14,6	11,8,3	68,49,48	76	54	0.0107147	0.140138	0.132,0.262,0.191	0.103,0.104,0.043	0.112
ENSG00000115694	STK25	2	-	242440154	242440211	242440892	242441123	242439587	242439696	242447420	242447550	3,4,4	11,14,18	9,8,5	68,88,68	76	76	0.0107991	0.140924	0.214,0.222,0.182	0.117,0.083,0.068	0.117
ENSG00000053371	AKR7A2	1	-	19633495	19633595	19634651	19634756	19632511	19632641	19634948	19635136	22,29,22	41,57,56	25,18,19	85,65,79	76	76	0.0109157	0.142125	0.349,0.337,0.282	0.227,0.217,0.194	0.11
ENSG00000122884	P4HA1	10	-	74803644	74803715	74804738	74804809	74790024	74790128	74806682	74806859	9,8,10	31,34,34	35,25,24	45,59,41	76	76	0.0109884	0.14275	0.225,0.19,0.227	0.438,0.298,0.369	-0.154
ENSG00000100479	POLE2	14	-	50141067	50141145	50146442	50146518	50140840	50140934	50150310	50150411	9,5,10	13,7,9	16,11,17	37,45,47	76	76	0.0110322	0.142999	0.409,0.417,0.526	0.302,0.196,0.266	0.196
ENSG00000100462	PRMT5	14	-	23396734	23396823	23397334	23397420	23394087	23394249	23397705	23397824	27,16,28	5,3,2	126,85,92	9,3,4	76	76	0.0111553	0.144169	0.844,0.842,0.933	0.933,0.966,0.958	-0.079
ENSG00000117399	CDC20	1	+	43826403	43826632	43827865	43827983	43826169	43826264	43828621	43828871	16,18,19	1,0,0	131152151	0,0,0	76	76	0.0111723	0.144169	0.941,1.0,1.0	1.0,1.0,1.0	-0.02
ENSG00000148187	MRRF	9	+	125047447	125047566	125054027	125054119	125042721	125042877	125084818	125085740	44,66,47	3,3,4	146106124	2,3,2	76	76	0.01124	0.14445	0.936,0.957,0.922	0.986,0.972,0.984	-0.042
ENSG00000163811	WDR43	2	+	29135455	29135576	29165177	29165247	29124852	29124990	29169315	29169365	0,1,2	19,10,24	0,0,0	60,53,52	76	76	0.0112438	0.14445	0.0,0.091,0.077	0.0,0.0,0.0	0.056
ENSG00000137074	APTX	9	-	32987541	32987729	32988080	32988122	32985968	32986028	32989756	32989893	4,5,1	8,10,10	25,23,26	17,24,19	72	76	0.0114392	0.146634	0.345,0.345,0.095	0.608,0.503,0.591	-0.306
ENSG00000175054	ATR	3	-	142215202	142215362	142215854	142216034	142211973	142212153	142217438	142217616	3,2,3	2,6,5	7,6,3	39,34,32	76	76	0.0116873	0.149484	0.6,0.25,0.375	0.152,0.15,0.086	0.279
ENSG00000166855	CLPX	15	-	65450912	65451089	65456366	65456526	65450083	65450248	65458968	65459123	10,6,8	10,8,13	79,93,93	47,54,56	76	76	0.0118015	0.150612	0.5,0.429,0.381	0.627,0.633,0.624	-0.191
ENSG00000185721	DRG1	22	+	31796605	31796729	31816241	31816411	31795508	31795711	31819265	31819396	6,10,12	0,4,6	51,56,48	8,5,1	76	76	0.0118623	0.151055	1.0,0.714,0.667	0.864,0.918,0.98	-0.127
ENSG00000107372	ZFAND5	9	-	74971846	74971972	74975543	74975700	74966340	74971017	74979611	74980163	2,1,1	23,24,30	2,1,1	119113108	76	76	0.0120089	0.151603	0.08,0.04,0.032	0.017,0.009,0.009	0.039
ENSG00000137073	UBAP2	9	-	33948371	33948585	33953282	33953472	33944362	33944637	33960823	33960876	1,0,2	2,3,5	2,0,6	36,42,52	76	76	0.0119634	0.151603	0.333,0.0,0.286	0.053,0.0,0.103	0.154
ENSG00000117543	DPH5	1	-	101460665	101460705	101467022	101467143	101455618	101456187	101479265	101479374	5,6,6	3,5,1	5,7,9	23,16,12	76	68	0.0119782	0.151603	0.599,0.518,0.843	0.163,0.281,0.402	0.371
ENSG00000234741	GAS5	1	-	173835665	173835705	173835898	173835934	173833037	173833213	173836128	173836181	12,11,14	1,3,1	29,34,25	0,0,0	60	68	0.0120099	0.151603	0.932,0.806,0.941	1.0,1.0,1.0	-0.107
ENSG00000149547	EI24	11	+	125449988	125450100	125452241	125452315	125448844	125448964	125453415	125453922	28,14,24	5,5,10	29,42,38	1,6,4	76	76	0.0120921	0.152308	0.848,0.737,0.706	0.967,0.875,0.905	-0.152
ENSG00000124562	SNRPC	6	+	34730371	34730480	34735684	34735774	34725688	34725731	34738067	34738172	49,35,47	255237279	102,70,66	279316339	75	75	0.0121318	0.152477	0.161,0.129,0.144	0.268,0.181,0.163	-0.059
ENSG00000108799	EZH1	17	-	40874812	40874933	40876322	40876442	40872290	40872467	40879652	40879781	1,1,3	4,7,3	25,25,22	16,8,12	76	76	0.0121922	0.152904	0.2,0.125,0.5	0.61,0.758,0.647	-0.397
ENSG00000126787	DLGAP5	14	-	55621334	55621524	55625239	55625459	55618412	55618659	55629688	55629793	22,24,22	1,1,1	130104114	1,2,0	76	76	0.0122772	0.153306	0.957,0.96,0.957	0.992,0.981,1.0	-0.033
ENSG00000213281	NRAS	1	-	115252189	115252349	115258670	115258798	115251151	115251275	115259278	115259515	54,66,55	31,35,47	145117124	61,51,43	76	76	0.0122759	0.153306	0.635,0.653,0.539	0.704,0.696,0.743	-0.105
ENSG00000143621	ILF2	1	-	153635494	153635752	153636518	153636606	153634540	153635032	153636871	153636950	36,46,52	13,10,17	28,18,21	3,1,1	76	76	0.0123298	0.153632	0.735,0.821,0.754	0.903,0.947,0.955	-0.165
ENSG00000168066	SF1	11	-	64534371	64534551	64534663	64534747	64532761	64532990	64535042	64535316	1,2,0	25,34,34	1,1,3	7,10,3	76	76	0.0123836	0.153972	0.038,0.056,0.0	0.125,0.091,0.5	-0.207
ENSG00000164754	RAD21	8	-	117870590	117870697	117874079	117874179	117869517	117869712	117875368	117875498	30,37,35	64,74,88	332307260	503419427	76	76	0.0126129	0.156486	0.319,0.333,0.285	0.398,0.423,0.378	-0.087
ENSG00000050748	MAPK9	5	-	179665331	179665403	179666923	179666987	179660593	179663531	179668030	179668155	28,49,41	3,4,7	60,65,105	4,2,3	76	76	0.0127426	0.157648	0.903,0.925,0.854	0.938,0.97,0.972	-0.066
ENSG00000148187	MRRF	9	+	125042721	125042877	125054027	125054119	125033142	125033354	125084818	125085740	6,6,11	2,3,4	26,21,26	1,4,2	76	76	0.0127623	0.157648	0.75,0.667,0.733	0.963,0.84,0.929	-0.194
ENSG00000064102	ASUN	12	-	27067340	27067511	27068934	27069113	27066906	27067061	27070284	27070374	3,11,3	13,15,22	89,66,63	86,76,76	76	76	0.0127881	0.157648	0.188,0.423,0.12	0.509,0.465,0.453	-0.232
ENSG00000175063	UBE2C	20	+	44443022	44443109	44444492	44444552	44441214	44441435	44445347	44445596	1,0,0	25,14,22	0,1,0	283329325	76	76	0.012923	0.158634	0.038,0.0,0.0	0.0,0.003,0.0	0.012
ENSG00000114867	EIF4G1	3	+	184041567	184041765	184041988	184042135	184041195	184041381	184042665	184042902	50,36,43	685870633	70,80,47	174616591322	76	76	0.0130051	0.158634	0.068,0.04,0.064	0.039,0.046,0.034	0.018
ENSG00000137955	RABGGTB	1	+	76254843	76255041	76256969	76257022	76252385	76253289	76257145	76257256	11,11,18	67,64,87	30,26,16	256224196	76	76	0.0129773	0.158634	0.141,0.147,0.171	0.105,0.104,0.075	0.058
ENSG00000026508	CD44	11	+	35211381	35211612	35236398	35236461	35208378	35208447	35240862	35240934	59,71,63	55,51,58	71,74,74	79,104,97	76	76	0.0129608	0.158634	0.518,0.582,0.521	0.473,0.416,0.433	0.1
ENSG00000167721	TSR1	17	-	2237765	2238190	2238553	2238688	2236850	2237010	2238804	2239024	16,22,27	49,41,58	31,45,29	147142111	76	76	0.0129902	0.158634	0.246,0.349,0.318	0.174,0.241,0.207	0.097
ENSG00000111641	NOP2	12	-	6670096	6670236	6671049	6671137	6669863	6669953	6672246	6672336	20,22,18	31,24,30	93,83,132	80,85,68	76	76	0.0132259	0.160989	0.392,0.478,0.375	0.538,0.494,0.66	-0.149
ENSG00000163811	WDR43	2	+	29129325	29129447	29135455	29135576	29124852	29124990	29136934	29137074	27,28,31	13,11,14	126141147	108106111	76	76	0.0132617	0.161087	0.675,0.718,0.689	0.538,0.571,0.57	0.134
ENSG00000149182	ARFGAP2	11	-	47193214	47193351	47196732	47196864	47189674	47189802	47197401	47197474	1,6,2	1,0,0	25,51,34	0,0,0	76	76	0.0133536	0.161863	0.5,1.0,1.0	1.0,1.0,1.0	-0.167
ENSG00000134058	CDK7	5	+	68553869	68553980	68555644	68555763	68551286	68551355	68558031	68558131	0,0,1	1,3,7	0,0,1	32,29,35	76	76	0.0133907	0.161975	0.0,0.0,0.125	0.0,0.0,0.028	0.032
ENSG00000015479	MATR3	5	+	138652741	138652794	138653284	138653410	138651764	138651877	138654596	138654631	249253224	3,4,6	328417438	1,0,0	67	67	0.013538	0.163415	0.988,0.984,0.974	0.997,1.0,1.0	-0.017
ENSG00000134057	CCNB1	5	+	68467096	68467279	68470703	68470940	68463999	68464170	68471223	68471364	64,63,58	50,42,57	421422437	546477470	76	76	0.0135717	0.163481	0.561,0.6,0.504	0.435,0.469,0.482	0.093
ENSG00000178741	COX5A	15	-	75215988	75216111	75219106	75219228	75212131	75212783	75221456	75221573	286336269	387432404	492381385	491410441	76	76	0.0136993	0.164676	0.425,0.438,0.4	0.501,0.482,0.466	-0.062
ENSG00000106070	GRB10	7	-	50771517	50771605	50799968	50800065	50742132	50742355	50823583	50823753	1,3,1	3,11,6	2,4,7	50,58,57	76	76	0.0137633	0.165103	0.25,0.214,0.143	0.038,0.065,0.109	0.132
ENSG00000184743	ATL3	11	-	63413978	63414035	63419942	63420047	63411640	63411733	63426232	63426376	179200175	13,20,23	532545465	34,35,29	76	76	0.0138261	0.165513	0.932,0.909,0.884	0.94,0.94,0.941	-0.032
ENSG00000123130	ACOT9	X	-	23739997	23740101	23748932	23749103	23725947	23726061	23751288	23751334	49,51,46	1,1,4	159141123	1,2,1	76	76	0.0139204	0.166298	0.98,0.981,0.92	0.994,0.986,0.992	-0.03
ENSG00000124795	DEK	6	-	18249881	18250070	18255961	18256082	18237611	18237747	18256591	18256686	134155125	180196146	323413539	918702722	76	76	0.0139819	0.16669	0.427,0.442,0.461	0.26,0.37,0.427	0.091
ENSG00000133657	ATP13A3	3	-	194140607	194140696	194146070	194146258	194134487	194134568	194147803	194147981	20,18,16	21,22,31	55,44,25	116,105,86	76	76	0.0142169	0.169143	0.488,0.45,0.34	0.322,0.295,0.225	0.145
ENSG00000215386	LINC00478	21	+	17603375	17603435	17763933	17764005	17566787	17566953	17859809	17859858	0,2,1	3,5,12	16,28,20	21,17,25	76	76	0.0143017	0.169803	0.0,0.286,0.077	0.432,0.622,0.444	-0.378
ENSG00000160753	RUSC1	1	+	155295106	155295281	155295357	155295463	155294892	155294969	155295654	155295701	4,8,3	1,3,2	29,32,16	3,3,1	76	76	0.0144231	0.170545	0.8,0.727,0.6	0.906,0.914,0.941	-0.211
ENSG00000124406	ATP8A1	4	-	42592827	42592901	42596305	42596379	42590276	42590346	42602494	42602535	4,1,3	0,0,0	3,6,0	0,1,1	73	73	0.0143944	0.170545	1.0,1.0,1.0	1.0,0.857,0.0	0.381
ENSG00000021762	OSBPL5	11	-	3125422	3125607	3128492	3128685	3123412	3123511	3129000	3129175	3,5,6	3,0,1	43,52,30	0,3,3	76	76	0.0146613	0.17301	0.5,1.0,0.857	1.0,0.945,0.909	-0.166
ENSG00000111845	PAK1IP1	6	+	10704979	10705077	10709185	10709309	10704739	10704885	10709470	10710015	1,6,5	4,4,9	12,11,11	75,43,51	76	76	0.0148601	0.174999	0.2,0.6,0.357	0.138,0.204,0.177	0.213
ENSG00000106028	SSBP1	7	+	141441968	141442029	141443360	141443501	141438923	141438990	141443701	141443789	125100134	55,58,60	284205196	82,79,70	76	76	0.0150825	0.177257	0.694,0.633,0.691	0.776,0.722,0.737	-0.072
ENSG00000163527	STT3B	3	+	31661167	31661322	31663588	31663800	31659431	31659480	31665165	31665353	24,44,39	386400361	41,39,22	494552603	76	76	0.0152307	0.178637	0.059,0.099,0.098	0.077,0.066,0.035	0.026
ENSG00000133706	LARS	5	-	145524186	145524272	145529184	145529262	145524034	145524100	145531424	145531565	150166121	174218212	355219294	315264299	76	76	0.0153863	0.179635	0.463,0.432,0.363	0.53,0.453,0.496	-0.074
ENSG00000173818	ENDOV	17	+	78391580	78391745	78396005	78396045	78389449	78389621	78397319	78397432	0,1,0	2,1,4	0,0,0	14,29,22	76	68	0.0154708	0.179635	0.0,0.472,0.0	0.0,0.0,0.0	0.157
ENSG00000164944	KIAA1429	8	-	95543190	95543313	95547066	95547235	95541297	95541570	95549330	95549379	6,1,2	3,3,7	24,29,25	7,9,8	76	76	0.0153676	0.179635	0.667,0.25,0.222	0.774,0.763,0.758	-0.385
ENSG00000135829	DHX9	1	+	182822440	182822553	182823164	182823313	182821367	182821479	182825666	182825713	25,32,29	211257214	58,56,44	225291315	76	76	0.0154425	0.179635	0.106,0.111,0.119	0.205,0.161,0.123	-0.051
ENSG00000113407	TARS	5	+	33453393	33453517	33455691	33455809	33448646	33448837	33456106	33456171	168170147	111129137	650574643	779606557	76	76	0.0154202	0.179635	0.602,0.569,0.518	0.455,0.486,0.536	0.071
ENSG00000101057	MYBL2	20	+	42328396	42328684	42331129	42331543	42315491	42315712	42333858	42333998	2,1,3	43,45,59	0,1,0	111,86,78	76	76	0.0155628	0.180342	0.044,0.022,0.048	0.0,0.011,0.0	0.034
ENSG00000105793	GTPBP10	7	+	89983771	89983863	89984399	89984544	89982129	89982323	90003615	90003668	0,2,3	3,1,2	17,14,12	3,1,0	76	76	0.015597	0.180377	0.0,0.667,0.6	0.85,0.933,1.0	-0.505
ENSG00000151414	NEK7	1	+	198201682	198201767	198222169	198222310	198189928	198190240	198231704	198231753	0,2,4	20,24,14	2,3,2	69,91,83	76	76	0.0157384	0.180946	0.0,0.077,0.222	0.028,0.032,0.024	0.072
ENSG00000108424	KPNB1	17	+	45740454	45740544	45741524	45741635	45738484	45738544	45742422	45742524	53,66,69	86,81,84	202186165	364353313	76	76	0.0157399	0.180946	0.381,0.449,0.451	0.357,0.345,0.345	0.078
ENSG00000149100	EIF3M	11	+	32608557	32608690	32610557	32610681	32605370	32605475	32611092	32611187	16,22,18	32,31,33	86,83,61	61,85,77	76	76	0.0157234	0.180946	0.333,0.415,0.353	0.585,0.494,0.442	-0.14
ENSG00000234741	GAS5	1	-	173834994	173835344	173835665	173835934	173834490	173834685	173836128	173836181	22,18,25	28,35,64	29,34,25	121,89,89	76	76	0.015781	0.18106	0.44,0.34,0.281	0.193,0.276,0.219	0.124
ENSG00000138750	NUP54	4	-	77057338	77057565	77065301	77065445	77055327	77055515	77065542	77065626	7,4,1	5,3,2	9,15,9	36,31,34	76	76	0.0158911	0.181963	0.583,0.571,0.333	0.2,0.326,0.209	0.251
ENSG00000107290	SETX	9	-	135163622	135163738	135163936	135164038	135161809	135161881	135171258	135171415	3,2,9	2,1,1	112,107,97	11,8,12	76	76	0.0160338	0.183013	0.6,0.667,0.9	0.911,0.93,0.89	-0.188
ENSG00000067334	DNTTIP2	1	-	94338674	94338770	94341823	94343418	94337627	94337792	94344632	94344718	6,12,3	31,30,33	28,15,16	230138179	76	76	0.0160776	0.183013	0.162,0.286,0.083	0.109,0.098,0.082	0.081
ENSG00000234741	GAS5	1	-	173834366	173834685	173835665	173835705	173833394	173833442	173835898	173835934	15,18,23	0,1,2	57,61,38	0,0,0	60	68	0.0160595	0.183013	1.0,0.953,0.929	1.0,1.0,1.0	-0.039
ENSG00000234741	GAS5	1	-	173835665	173835705	173835898	173835934	173834994	173835032	173836128	173836181	12,12,13	1,4,0	29,34,25	0,0,0	54	62	0.0162758	0.184906	0.932,0.775,1.0	1.0,1.0,1.0	-0.098
ENSG00000149547	EI24	11	+	125448844	125448964	125451106	125451218	125448028	125448153	125452241	125452299	20,24,22	30,29,41	68,46,37	30,44,40	76	76	0.0164911	0.185682	0.4,0.453,0.349	0.694,0.511,0.481	-0.161
ENSG00000112078	KCTD20	6	+	36442565	36442839	36446897	36447000	36437828	36438034	36449338	36449536	5,4,3	1,0,1	75,69,77	5,7,0	76	76	0.0163876	0.185682	0.833,1.0,0.75	0.938,0.908,1.0	-0.088
ENSG00000095485	CWF19L1	10	-	102019974	102020076	102020722	102020801	102016018	102016233	102021735	102021820	7,5,6	13,10,11	21,14,20	86,84,57	76	76	0.0164886	0.185682	0.35,0.333,0.353	0.196,0.143,0.26	0.146
ENSG00000075711	DLG1	3	-	196803456	196803556	196807921	196807988	196802707	196802741	196812450	196812627	20,24,23	2,0,0	100,116,83	0,1,0	66	66	0.0165044	0.185682	0.909,1.0,1.0	1.0,0.991,1.0	-0.027
ENSG00000234741	GAS5	1	-	173834647	173834685	173835665	173835934	173833394	173833442	173836128	173836181	14,11,13	0,3,2	29,34,26	0,0,0	76	64	0.0164821	0.185682	1.0,0.755,0.846	1.0,1.0,1.0	-0.133
ENSG00000155506	LARP1	5	+	154169884	154169946	154170204	154170270	154135134	154135753	154172181	154172356	12,13,15	39,37,38	32,30,27	130143162	76	76	0.016566	0.186014	0.235,0.26,0.283	0.198,0.173,0.143	0.088
ENSG00000114120	SLC25A36	3	+	140678304	140678382	140681968	140682069	140675368	140675533	140692557	140692847	2,3,4	1,0,1	53,34,23	1,3,1	76	76	0.0166661	0.186776	0.667,1.0,0.8	0.981,0.919,0.958	-0.13
ENSG00000028116	VRK2	2	+	58311223	58311273	58315475	58315581	58276015	58276102	58316765	58316858	9,7,6	6,9,10	39,33,30	20,13,12	76	76	0.0167079	0.186883	0.6,0.438,0.375	0.661,0.717,0.714	-0.226
ENSG00000144824	PHLDB2	3	+	111671418	111671559	111672776	111672876	111664114	111664204	111680954	111681159	0,0,2	4,8,0	2,1,0	72,85,76	76	76	0.0168463	0.188068	0.0,0.0,1.0	0.027,0.012,0.0	0.32
ENSG00000155096	AZIN1	8	-	103842048	103842164	103845283	103845446	103841499	103841714	103846416	103846491	5,3,7	2,10,10	32,14,16	89,107,93	76	76	0.0169951	0.189364	0.714,0.231,0.412	0.264,0.116,0.147	0.277
ENSG00000159399	HK2	2	+	75081419	75081582	75094762	75094911	75061278	75061770	75099426	75099546	0,1,0	3,3,6	0,0,0	28,23,36	76	76	0.0171491	0.190714	0.0,0.25,0.0	0.0,0.0,0.0	0.083
ENSG00000126746	ZNF384	12	-	6778196	6778355	6779925	6780004	6775642	6777281	6782381	6782606	11,4,6	3,5,3	26,36,45	54,72,61	76	76	0.0172379	0.191334	0.786,0.444,0.667	0.325,0.333,0.425	0.271
ENSG00000153071	DAB2	5	-	39382719	39383373	39388406	39388469	39381555	39381718	39388900	39388954	10,8,4	5,5,1	71,71,62	91,101,87	76	76	0.017458	0.193406	0.667,0.615,0.8	0.438,0.413,0.416	0.272
ENSG00000108846	ABCC3	17	+	48733192	48733369	48742513	48742606	48712217	48712342	48744914	48745284	2,4,3	4,4,3	13,27,9	4,5,5	76	76	0.0178786	0.197312	0.333,0.5,0.5	0.765,0.844,0.643	-0.306
ENSG00000136045	PWP1	12	+	108096711	108096808	108097461	108097523	108091243	108091374	108098412	108098524	2,0,1	5,7,5	1,0,0	22,32,24	76	76	0.0178694	0.197312	0.286,0.0,0.167	0.043,0.0,0.0	0.137
ENSG00000113407	TARS	5	+	33455086	33455171	33455691	33455809	33448646	33448837	33456106	33456171	3,2,2	111129137	0,0,0	779606557	76	76	0.0179162	0.197351	0.026,0.015,0.014	0.0,0.0,0.0	0.018
ENSG00000070915	SLC12A3	16	+	56913453	56913561	56916307	56916409	56912984	56913139	56917960	56918116	14,12,16	53,84,72	26,37,35	256307232	76	76	0.0180625	0.19748	0.209,0.125,0.182	0.092,0.108,0.131	0.062
ENSG00000164934	DCAF13	8	+	104433202	104433310	104453682	104453846	104432491	104432691	104455022	104455678	20,35,28	26,50,32	90,76,66	46,75,56	76	76	0.0180643	0.19748	0.435,0.412,0.467	0.662,0.503,0.541	-0.131
ENSG00000167535	CACNB3	12	+	49217463	49217586	49218040	49218156	49217126	49217249	49218451	49218516	2,2,2	0,1,1	17,29,14	0,1,1	76	76	0.0180231	0.19748	1.0,0.667,0.667	1.0,0.967,0.933	-0.189
ENSG00000077809	GTF2I	7	+	74133197	74133260	74143123	74143234	74131213	74131270	74144566	74144632	18,26,13	49,56,47	63,68,65	222298310	76	76	0.018029	0.19748	0.269,0.317,0.217	0.221,0.186,0.173	0.074
ENSG00000166012	TAF1D	11	-	93463842	93463878	93466515	93466563	93463446	93463613	93467790	93467826	29,26,27	69,64,101	30,29,28	119150122	68	52	0.0184252	0.201046	0.243,0.237,0.17	0.162,0.129,0.149	0.07
ENSG00000117593	DARS2	1	+	173814366	173814429	173819464	173819617	173810003	173810111	173822486	173822705	35,40,27	87,83,112	92,56,50	112104109	76	76	0.0185692	0.201396	0.287,0.325,0.194	0.451,0.35,0.314	-0.103
ENSG00000110172	CHORDC1	11	-	89943703	89943762	89951302	89951352	89936475	89936595	89956058	89956227	35,31,42	0,1,1	153192170	0,0,0	76	76	0.0185274	0.201396	1.0,0.969,0.977	1.0,1.0,1.0	-0.018
ENSG00000107290	SETX	9	-	135218076	135218186	135221647	135221858	135211682	135211902	135224638	135224822	1,0,1	9,12,9	6,4,6	204192149	76	76	0.0185963	0.201396	0.1,0.0,0.1	0.029,0.02,0.039	0.037
ENSG00000090621	PABPC4	1	-	40027744	40027875	40029285	40029413	40026487	40026794	40030094	40030214	9,9,4	4,6,7	9,10,8	2,0,1	76	76	0.0185045	0.201396	0.692,0.6,0.364	0.818,1.0,0.889	-0.35
ENSG00000151327	FAM177A1	14	+	35522483	35522657	35546355	35546422	35515608	35515834	35548132	35548230	32,36,40	29,22,34	114,118,99	64,63,34	76	76	0.0186495	0.201595	0.525,0.621,0.541	0.64,0.652,0.744	-0.116
ENSG00000111142	METAP2	12	+	95876990	95877056	95897840	95897937	95869849	95869954	95905670	95905774	80,73,76	33,29,25	180166189	53,44,37	76	76	0.0186932	0.201692	0.708,0.716,0.752	0.773,0.79,0.836	-0.074
ENSG00000118705	RPN2	20	+	35860698	35860794	35862422	35862498	35858375	35858462	35864982	35865112	685762677	166181237	489707831	269250231	76	76	0.0188893	0.203122	0.805,0.808,0.741	0.645,0.739,0.782	0.063
ENSG00000165802	NELF	9	-	140347187	140347271	140347507	140347632	140346816	140346887	140348182	140348272	10,11,10	0,1,1	57,69,45	1,0,1	76	76	0.0188959	0.203122	1.0,0.917,0.909	0.983,1.0,0.978	-0.045
ENSG00000165630	PRPF18	10	+	13639457	13639535	13642243	13642348	13628926	13629152	13647630	13647744	3,1,6	15,16,17	7,3,6	61,65,82	76	76	0.0189743	0.203211	0.167,0.059,0.261	0.103,0.044,0.068	0.091
ENSG00000009307	CSDE1	1	-	115266503	115266623	115267841	115267954	115263159	115263338	115268831	115269007	8851079825	381421516	155514311323	634499446	76	76	0.0189491	0.203211	0.699,0.719,0.615	0.71,0.741,0.748	-0.055
ENSG00000142178	SIK1	21	-	44839738	44839885	44840113	44840337	44839232	44839358	44840889	44841013	8,11,20	5,4,4	92,108,92	84,91,80	76	76	0.019045	0.203217	0.615,0.733,0.833	0.523,0.543,0.535	0.193
ENSG00000100644	HIF1A	14	+	62207472	62207906	62211422	62211531	62204804	62205091	62212408	62212535	2,2,2	111,99,91	9,4,3	662679649	76	76	0.019024	0.203217	0.018,0.02,0.022	0.013,0.006,0.005	0.012
ENSG00000185324	CDK10	16	+	89753996	89754223	89755659	89755732	89753097	89753205	89756960	89757032	1,0,2	3,3,4	4,9,3	57,69,60	76	76	0.0193653	0.206255	0.25,0.0,0.333	0.066,0.115,0.048	0.118
ENSG00000110075	PPP6R3	11	+	68343425	68343511	68350510	68350597	68341576	68341692	68355412	68355492	17,17,15	3,5,6	114116122	15,16,17	76	76	0.0194424	0.206517	0.85,0.773,0.714	0.884,0.879,0.878	-0.101
ENSG00000112983	BRD8	5	-	137499275	137499332	137499775	137499822	137498818	137499033	137500008	137500102	9,9,14	1,0,0	230257243	4,7,2	76	76	0.0195172	0.206517	0.9,1.0,1.0	0.983,0.973,0.992	-0.016
ENSG00000095564	BTAF1	10	+	93716284	93716414	93716981	93717050	93713493	93713630	93718821	93718911	6,12,10	12,8,14	252272213	133142131	76	76	0.0195682	0.206517	0.333,0.6,0.417	0.655,0.657,0.619	-0.194
ENSG00000185753	CXorf38	X	-	40498260	40498380	40506258	40506393	40496258	40496408	40506556	40506799	2,3,1	3,1,1	1,2,1	9,11,9	76	76	0.0195546	0.206517	0.4,0.75,0.5	0.1,0.154,0.1	0.432
ENSG00000145833	DDX46	5	+	134099593	134099782	134102606	134102750	134094484	134094645	134106592	134106689	15,24,20	99,144,97	29,20,12	176200201	76	76	0.0194821	0.206517	0.132,0.143,0.171	0.141,0.091,0.056	0.053
ENSG00000140943	MBTPS1	16	-	84104192	84104381	84108201	84108346	84103470	84103643	84115351	84115513	29,35,44	30,35,31	59,52,62	90,79,77	76	76	0.0196845	0.207367	0.492,0.5,0.587	0.396,0.397,0.446	0.113
ENSG00000198363	ASPH	8	-	62531536	62531578	62546241	62546286	62496502	62496588	62550505	62550562	42,37,56	162159155	30,63,39	256227205	76	72	0.0198194	0.207656	0.197,0.181,0.255	0.1,0.208,0.153	0.057
ENSG00000148341	SH3GLB2	9	-	131774514	131774577	131776689	131776782	131772948	131772972	131777049	131777183	30,36,37	34,51,36	114,119,96	71,89,88	56	56	0.0197935	0.207656	0.469,0.414,0.507	0.616,0.572,0.522	-0.107
ENSG00000118200	CAMSAP2	1	+	200729966	200730226	200776503	200776665	200708906	200709094	200784688	200784772	5,3,8	14,13,18	45,51,54	66,68,50	76	76	0.0197988	0.207656	0.263,0.188,0.308	0.405,0.429,0.519	-0.198
ENSG00000064490	RFXANK	19	+	19307994	19308060	19308329	19308430	19307771	19307855	19308915	19309041	7,24,9	9,9,11	76,94,87	24,31,30	76	76	0.0199079	0.208142	0.438,0.727,0.45	0.76,0.752,0.744	-0.214
ENSG00000196531	NACA	12	-	57108385	57108471	57118235	57118307	57107320	57107467	57119046	57119326	42,36,40	1,3,2	49,65,61	0,0,0	76	76	0.0199377	0.208142	0.977,0.923,0.952	1.0,1.0,1.0	-0.049
ENSG00000143398	PIP5K1A	1	+	151196720	151196755	151196846	151196882	151171050	151171557	151199795	151199876	1,1,3	1,1,1	35,51,31	4,7,6	58	60	0.020242	0.210939	0.508,0.508,0.756	0.901,0.883,0.842	-0.285
ENSG00000163812	ZDHHC3	3	-	44970797	44970928	44974609	44974691	44966662	44968339	44975379	44975476	29,34,37	16,21,21	53,55,53	56,56,44	76	76	0.0203367	0.211545	0.644,0.618,0.638	0.486,0.495,0.546	0.124
ENSG00000213676	ATF6B	6	-	32085363	32085471	32085635	32085815	32085099	32085181	32086551	32086643	2,4,4	6,7,12	20,26,15	20,23,8	76	76	0.0204036	0.211861	0.25,0.364,0.25	0.5,0.531,0.652	-0.273
ENSG00000204569	PPP1R10	6	-	30575616	30575668	30576555	30576691	30574244	30574418	30576853	30576940	12,11,19	1,0,1	48,57,44	0,0,0	76	76	0.0205115	0.2126	0.923,1.0,0.95	1.0,1.0,1.0	-0.042
ENSG00000082996	RNF13	3	+	149563797	149563927	149589815	149589941	149531606	149531813	149613259	149613285	0,2,0	24,37,32	0,0,1	144132124	58	58	0.0206564	0.21372	0.0,0.051,0.0	0.0,0.0,0.008	0.014
ENSG00000113456	RAD1	5	-	34911658	34911917	34913574	34913683	34908276	34909053	34914799	34915066	2,1,4	0,2,0	59,40,32	3,1,0	76	76	0.0208097	0.21454	1.0,0.333,1.0	0.952,0.976,1.0	-0.198
ENSG00000147687	TATDN1	8	-	125528127	125528271	125531058	125531122	125527986	125528029	125535177	125535243	26,27,27	65,70,100	34,16,23	114127107	75	75	0.0208097	0.21454	0.286,0.278,0.213	0.23,0.112,0.177	0.086
ENSG00000073008	PVR	19	+	45161029	45161178	45162009	45162168	45157168	45157286	45164558	45164590	2,1,1	1,1,2	16,15,20	1,4,3	64	64	0.0210364	0.215515	0.667,0.5,0.333	0.941,0.789,0.87	-0.367
ENSG00000166483	WEE1	11	+	9597776	9597840	9598033	9598206	9597434	9597640	9598688	9598810	22,15,29	10,20,13	77,63,47	24,14,17	76	76	0.021053	0.215515	0.688,0.429,0.69	0.762,0.818,0.734	-0.169
ENSG00000114270	COL7A1	3	-	48612639	48612675	48612771	48612972	48612496	48612559	48613058	48613181	71,81,135	23,25,48	165184137	35,44,28	76	60	0.0210122	0.215515	0.709,0.719,0.689	0.788,0.768,0.794	-0.078
ENSG00000174243	DDX23	12	-	49224924	49225099	49225860	49225969	49223962	49224475	49226204	49226356	12,19,17	30,42,26	111160151	175172151	76	76	0.0209743	0.215515	0.286,0.311,0.395	0.388,0.482,0.5	-0.126
ENSG00000115758	ODC1	2	-	10584220	10584393	10584599	10584773	10583827	10583962	10585056	10585175	254312288	25,36,42	780636481	66,44,49	76	76	0.0211298	0.215902	0.91,0.897,0.873	0.922,0.935,0.908	-0.028
ENSG00000115295	CLIP4	2	+	29383198	29383333	29386696	29386820	29380069	29380213	29390341	29390406	1,1,3	2,1,2	11,15,16	3,3,1	76	76	0.021198	0.215902	0.333,0.5,0.6	0.786,0.833,0.941	-0.376
ENSG00000138092	CENPO	2	+	25016720	25016834	25022543	25022713	25016013	25016370	25037244	25037362	0,1,0	3,3,5	2,1,1	37,53,57	76	76	0.0212173	0.215902	0.0,0.25,0.0	0.051,0.019,0.017	0.054
ENSG00000169241	SLC50A1	1	+	155108774	155108852	155109303	155109427	155108325	155108467	155110036	155110198	27,33,28	3,11,8	50,65,52	22,36,29	76	76	0.0212772	0.215902	0.9,0.75,0.778	0.694,0.644,0.642	0.149
ENSG00000100106	TRIOBP	22	+	38165268	38165382	38167656	38167743	38164080	38164183	38168607	38168771	2,0,0	2,2,2	0,1,2	23,34,23	76	76	0.0212524	0.215902	0.5,0.0,0.0	0.0,0.029,0.08	0.13
ENSG00000120705	ETF1	5	-	137844357	137844505	137846253	137846318	137841783	137844076	137846733	137846889	0,2,0	31,39,30	0,0,0	140129110	76	76	0.0215467	0.218255	0.0,0.049,0.0	0.0,0.0,0.0	0.016
ENSG00000160714	UBE2Q1	1	-	154523872	154523968	154524568	154524659	154521052	154522945	154524879	154524940	41,44,43	1,4,1	136100103	3,1,0	76	76	0.0218611	0.221053	0.976,0.917,0.977	0.978,0.99,1.0	-0.033
ENSG00000254870	ATP6V1G2-DDX39B	6	-	31498829	31498974	31499072	31499182	31498555	31498703	31500556	31500688	57,57,61	59,77,82	80107116	183197163	76	76	0.0220057	0.222127	0.491,0.425,0.427	0.304,0.352,0.416	0.09
ENSG00000138777	PPA2	4	-	106367539	106367659	106370506	106370560	106359171	106359193	106374754	106374799	95,86,81	194215187	150139127	226217262	54	54	0.0221217	0.22291	0.329,0.286,0.302	0.399,0.39,0.326	-0.066
ENSG00000026025	VIM	10	+	17277844	17277888	17278292	17278378	17277167	17277388	17279228	17279584	171129179	417429502	153150186	675580529	76	76	0.022465	0.225976	0.291,0.231,0.263	0.185,0.205,0.26	0.045
ENSG00000104320	NBN	8	-	90955480	90955594	90960051	90960120	90945711	90947840	90965471	90965919	19,31,30	1,1,0	100,75,97	0,0,0	76	76	0.0225554	0.2261	0.95,0.969,1.0	1.0,1.0,1.0	-0.027
ENSG00000101464	PIGU	20	-	33169351	33169476	33173240	33173384	33162907	33163050	33176256	33176411	2,4,9	20,20,21	31,23,32	46,48,52	76	76	0.0225521	0.2261	0.091,0.167,0.3	0.403,0.324,0.381	-0.183
ENSG00000204574	ABCF1	6	+	30548182	30548296	30550170	30550284	30547707	30547782	30550842	30550965	44,53,41	24,33,35	191187214	70,106,81	76	76	0.0226858	0.227015	0.647,0.616,0.539	0.732,0.638,0.725	-0.098
ENSG00000196950	SLC39A10	2	+	196571339	196571509	196573379	196573568	196548422	196548630	196578156	196578277	18,19,30	165187136	48,31,33	385426425	76	76	0.0227321	0.227086	0.098,0.092,0.181	0.111,0.068,0.072	0.04
ENSG00000197622	CDC42SE1	1	-	151027491	151027602	151028152	151028469	151026706	151026797	151031954	151032087	2,4,2	7,9,5	12,39,19	164139117	76	76	0.0228668	0.228038	0.222,0.308,0.286	0.068,0.219,0.14	0.13
ENSG00000205581	HMGN1	21	-	40717755	40717884	40719172	40719218	40717071	40717200	40719304	40719409	4,8,8	3,8,7	8,8,4	19,20,10	76	76	0.0229844	0.228817	0.571,0.5,0.533	0.296,0.286,0.286	0.245
ENSG00000234741	GAS5	1	-	173835314	173835344	173835665	173835705	173834608	173834685	173835898	173835934	23,25,35	2,4,3	57,61,37	2,1,1	60	40	0.0231649	0.230219	0.885,0.806,0.886	0.95,0.976,0.961	-0.103
ENSG00000128595	CALU	7	+	128399845	128399906	128407509	128407709	128398924	128399091	128409116	128411530	64,67,96	304375290	138,85,73	606552544	76	76	0.0233922	0.231287	0.174,0.152,0.249	0.185,0.133,0.118	0.046
ENSG00000103429	BFAR	16	+	14742244	14742449	14748922	14749067	14738130	14738466	14755748	14755922	2,6,3	0,2,1	24,19,20	34,22,41	76	76	0.0233184	0.231287	1.0,0.75,0.75	0.414,0.463,0.328	0.432
ENSG00000090316	MAEA	4	+	1309184	1309388	1316168	1316291	1305766	1305949	1321414	1321491	5,8,5	2,2,0	42,44,34	3,2,2	76	76	0.0233807	0.231287	0.714,0.8,1.0	0.933,0.957,0.944	-0.107
ENSG00000130702	LAMA5	20	-	60900371	60900602	60901732	60901816	60899496	60899610	60901920	60902022	7,4,5	21,16,18	18,27,14	24,28,31	76	76	0.0234906	0.231773	0.25,0.2,0.217	0.429,0.491,0.311	-0.188
ENSG00000162290	DCP1A	3	-	53346270	53346409	53378928	53378969	53326098	53326857	53381409	53381570	1,4,4	2,3,0	13,16,12	0,0,1	70	76	0.0235213	0.231773	0.352,0.591,1.0	1.0,1.0,0.929	-0.329
ENSG00000143106	PSMA5	1	-	109952549	109952636	109953632	109953735	109944418	109944712	109954498	109954557	55,62,76	447475441	125104115	92911431174	76	76	0.0236181	0.232058	0.11,0.115,0.147	0.119,0.083,0.089	0.027
ENSG00000009335	UBE3C	7	+	156956503	156956557	156961741	156961816	156931606	156932032	156962997	156963144	19,19,14	20,18,19	34,33,30	70,56,60	76	76	0.0236303	0.232058	0.487,0.514,0.424	0.327,0.371,0.333	0.131
ENSG00000166136	NDUFB8	10	-	102286155	102286311	102286731	102286831	102283496	102283686	102289136	102289263	325305322	44,51,62	308316362	108,64,63	76	76	0.023692	0.23227	0.881,0.857,0.839	0.74,0.832,0.852	0.051
ENSG00000196526	AFAP1	4	-	7857192	7857301	7870348	7870446	7844865	7845077	7873678	7873807	9,1,8	8,5,7	25,20,19	10,8,4	76	76	0.0237995	0.232537	0.529,0.167,0.533	0.714,0.714,0.826	-0.342
ENSG00000127663	KDM4B	19	+	5071020	5071070	5077377	5077481	5047486	5047680	5082377	5082515	1,3,4	0,0,1	13,10,12	23,15,15	76	76	0.0237606	0.232537	1.0,1.0,0.8	0.361,0.4,0.444	0.532
ENSG00000171634	BPTF	17	+	65871671	65871860	65882243	65882432	65870932	65871136	65887959	65888150	0,1,0	4,1,3	7,2,2	78,77,91	76	76	0.0239198	0.233319	0.0,0.5,0.0	0.082,0.025,0.022	0.124
ENSG00000082701	GSK3B	3	-	119642219	119642330	119666114	119666198	119582265	119582452	119720892	119721086	9,8,10	0,1,0	58,53,58	0,0,1	76	76	0.024198	0.235536	1.0,0.889,1.0	1.0,1.0,0.983	-0.031
ENSG00000254673	RP11-598P20.5	8	+	42924697	42924802	42927323	42927450	42919243	42919358	42932358	42932477	1,1,1	0,3,0	33,15,11	0,1,1	76	76	0.0242284	0.235536	1.0,0.25,1.0	1.0,0.938,0.917	-0.202
ENSG00000132600	PRMT7	16	+	68381533	68381581	68382244	68382334	68380047	68380183	68386150	68386312	0,1,3	16,19,16	3,2,0	78,63,85	76	76	0.0243335	0.235961	0.0,0.05,0.158	0.037,0.031,0.0	0.047
ENSG00000166226	CCT2	12	+	69991747	69991851	69992101	69992201	69991417	69991546	69993642	69993784	30,44,47	219198216	87,96,60	606582563	76	76	0.0243536	0.235961	0.12,0.182,0.179	0.126,0.142,0.096	0.039
ENSG00000204394	VARS	6	-	31750497	31750622	31750872	31750963	31750306	31750410	31752170	31752279	1,0,3	19,28,19	6,8,10	40,28,24	76	76	0.0246188	0.236873	0.05,0.0,0.136	0.13,0.222,0.294	-0.153
ENSG00000100591	AHSA1	14	+	77928502	77928585	77928984	77929102	77925958	77926149	77930940	77931029	75,70,67	100,95,119	259176214	263222221	76	76	0.0246115	0.236873	0.429,0.424,0.36	0.496,0.442,0.492	-0.072
ENSG00000140525	FANCI	15	+	89811629	89811756	89816607	89816700	89807752	89807838	89817398	89817535	19,24,29	21,18,33	28,32,26	64,46,41	76	76	0.0246346	0.236873	0.475,0.571,0.468	0.304,0.41,0.388	0.137
ENSG00000138180	CEP55	10	+	95266744	95266813	95275161	95275312	95262869	95263145	95276691	95277005	9,7,13	4,11,14	49,40,43	108,96,92	76	76	0.0246443	0.236873	0.692,0.389,0.481	0.312,0.294,0.319	0.212
ENSG00000137074	APTX	9	-	32987541	32987844	32988080	32988127	32985968	32986028	32989756	32989893	11,11,7	6,3,9	67,57,48	13,18,9	76	76	0.0246521	0.236873	0.647,0.786,0.438	0.838,0.76,0.842	-0.19
ENSG00000037474	NSUN2	5	-	6618062	6618137	6631985	6632090	6616839	6616970	6632711	6632869	16,28,38	87,91,76	81,56,42	316312258	76	76	0.0260485	0.249876	0.155,0.235,0.333	0.204,0.152,0.14	0.076
ENSG00000050426	LETMD1	12	+	51445874	51445990	51447560	51447643	51442816	51442968	51450132	51450285	13,5,8	3,5,4	39,51,35	5,7,9	76	76	0.0261834	0.250755	0.813,0.5,0.667	0.886,0.879,0.795	-0.193
ENSG00000076513	ANKRD13A	12	+	110458912	110459106	110461850	110461917	110456943	110457133	110463546	110463628	1,1,0	11,14,11	1,0,0	60,58,31	76	76	0.026454	0.252512	0.083,0.067,0.0	0.016,0.0,0.0	0.045
ENSG00000145860	RNF145	5	-	158589939	158590087	158595880	158596063	158588273	158588630	158596686	158596827	1,2,0	0,0,1	32,44,33	0,0,0	76	76	0.0264113	0.252512	1.0,1.0,0.0	1.0,1.0,1.0	-0.333
ENSG00000166483	WEE1	11	+	9597776	9597840	9598688	9598810	9597434	9597640	9603078	9603225	24,13,26	8,9,15	77,63,47	19,15,15	76	76	0.0265453	0.252966	0.75,0.591,0.634	0.802,0.808,0.758	-0.131
ENSG00000087206	UIMC1	5	-	176385093	176385155	176395555	176396292	176382959	176383036	176396601	176396707	1,0,0	4,5,7	0,0,0	26,32,34	76	76	0.0266817	0.253541	0.2,0.0,0.0	0.0,0.0,0.0	0.067
ENSG00000138668	HNRNPD	4	-	83276047	83276154	83276456	83276554	83274986	83275307	83277948	83278048	23,18,23	1,1,0	95,54,54	0,0,0	76	76	0.0267647	0.253541	0.958,0.947,1.0	1.0,1.0,1.0	-0.032
ENSG00000164828	SUN1	7	+	882977	883157	888054	888252	881582	881767	889156	889240	3,0,0	39,56,41	0,1,0	172108117	76	76	0.0267215	0.253541	0.071,0.0,0.0	0.0,0.009,0.0	0.021
ENSG00000138777	PPA2	4	-	106359106	106359193	106367539	106367659	106345352	106345479	106370506	106370560	58,52,75	58,48,67	51,45,32	72,50,65	76	76	0.0267806	0.253541	0.5,0.52,0.528	0.415,0.474,0.33	0.11
ENSG00000153044	CENPH	5	+	68491543	68491618	68492879	68492936	68490473	68490522	68498332	68498396	32,39,51	13,31,24	66,73,73	14,32,20	76	76	0.0269292	0.254531	0.711,0.557,0.68	0.825,0.695,0.785	-0.119
ENSG00000106853	PTGR1	9	-	114348277	114348445	114355205	114355262	114345751	114345869	114356501	114356547	223285242	45,48,59	354408389	69,59,41	76	76	0.0271576	0.255856	0.832,0.856,0.804	0.837,0.874,0.905	-0.041
ENSG00000131051	RBM39	20	-	34292589	34292668	34293146	34293252	34291531	34292503	34295041	34295123	44,76,54	1,1,1	751824659	0,0,0	76	76	0.0271327	0.255856	0.978,0.987,0.982	1.0,1.0,1.0	-0.018
ENSG00000166451	CENPN	16	+	81051362	81051439	81053704	81053881	81050930	81050990	81056359	81056490	18,11,22	50,42,79	29,43,36	64,82,75	76	76	0.0272332	0.256151	0.265,0.208,0.218	0.312,0.344,0.324	-0.096
ENSG00000108100	CCNY	10	+	35790428	35790463	35819051	35819171	35625801	35626135	35841946	35842113	0,0,3	29,24,23	0,0,0	56,65,75	58	76	0.0273466	0.256801	0.0,0.0,0.146	0.0,0.0,0.0	0.049
ENSG00000129484	PARP2	14	+	20822967	20823106	20824055	20824190	20822243	20822406	20824465	20824593	3,4,2	9,4,2	95,116,84	38,50,67	76	76	0.0273953	0.256842	0.25,0.5,0.5	0.714,0.699,0.556	-0.24
ENSG00000130164	LDLR	19	+	11215895	11216276	11218067	11218190	11213339	11213462	11221327	11221447	4,6,4	11,14,8	87,81,73	75,97,83	76	76	0.0276273	0.258181	0.267,0.3,0.333	0.537,0.455,0.468	-0.187
ENSG00000004864	SLC25A13	7	-	95838149	95838289	95906507	95906650	95822348	95822495	95926209	95926263	14,13,10	9,22,19	28,14,15	66,47,49	76	76	0.0276042	0.258181	0.609,0.371,0.345	0.298,0.23,0.234	0.188
ENSG00000012048	BRCA1	17	-	41246760	41246877	41247862	41247939	41242960	41243049	41249260	41249306	2,3,4	0,1,0	36,36,31	3,0,0	76	76	0.0277631	0.258245	1.0,0.75,1.0	0.923,1.0,1.0	-0.058
ENSG00000198363	ASPH	8	-	62559308	62559437	62563608	62563683	62557158	62557191	62566126	62566219	766903778	624652728	119211681109	861729736	65	65	0.0277542	0.258245	0.551,0.581,0.517	0.581,0.616,0.601	-0.05
ENSG00000234741	GAS5	1	-	173834366	173834685	173835665	173835934	173833394	173833442	173836128	173836181	14,11,13	0,2,2	29,34,26	0,0,0	76	76	0.0277678	0.258245	1.0,0.846,0.867	1.0,1.0,1.0	-0.096
ENSG00000162227	TAF6L	11	+	62546340	62546435	62550164	62550297	62545756	62545807	62553731	62553860	0,0,1	15,21,14	11,14,12	39,57,65	76	76	0.0278324	0.258431	0.0,0.0,0.067	0.22,0.197,0.156	-0.169
ENSG00000166200	COPS2	15	-	49431724	49431850	49436423	49436501	49429544	49429634	49437161	49437275	177205158	33,36,31	665700681	91,86,98	76	76	0.0279504	0.259111	0.843,0.851,0.836	0.88,0.891,0.874	-0.038
ENSG00000067955	CBFB	16	+	67100584	67100701	67116115	67116211	67070541	67070658	67132612	67134956	10,8,6	20,14,16	24,11,18	75,64,71	76	76	0.0281773	0.260798	0.333,0.364,0.273	0.242,0.147,0.202	0.126
ENSG00000167770	OTUB1	11	+	63756098	63756224	63764001	63764120	63755808	63755870	63764328	63764413	0,0,2	7,7,8	0,0,0	29,29,28	76	76	0.0283523	0.261999	0.0,0.0,0.2	0.0,0.0,0.0	0.067
ENSG00000155256	ZFYVE27	10	+	99508025	99508121	99509230	99509343	99498233	99498431	99510087	99510227	0,1,0	3,0,1	0,0,1	20,42,35	76	76	0.0284946	0.262033	0.0,1.0,0.0	0.0,0.0,0.028	0.324
ENSG00000167670	CHAF1A	19	+	4408899	4409756	4418016	4418073	4405908	4405959	4422562	4422792	2,2,4	1,1,1	31,30,31	56,67,43	76	76	0.028612	0.262033	0.667,0.667,0.8	0.356,0.309,0.419	0.35
ENSG00000256511	NA	22	+	24963951	24964144	24967883	24967985	24953624	24953768	24979649	24979776	163181231	17,11,12	351286234	18,8,9	76	76	0.0284719	0.262033	0.906,0.943,0.951	0.951,0.973,0.963	-0.029
ENSG00000100941	PNN	14	+	39646796	39646891	39647044	39647120	39646615	39646688	39648294	39648450	5,2,3	15,14,6	28,36,22	190267160	76	76	0.0285902	0.262033	0.25,0.125,0.333	0.128,0.119,0.121	0.113
ENSG00000182944	EWSR1	22	+	29688125	29688158	29688476	29688595	29682911	29683123	29692228	29692358	3,2,1	24,29,33	0,1,1	57,62,59	54	76	0.0286274	0.262033	0.15,0.088,0.041	0.0,0.022,0.023	0.078
ENSG00000149100	EIF3M	11	+	32610139	32610278	32610557	32610681	32605384	32605475	32611092	32611187	1,2,0	32,31,33	0,0,0	61,85,77	76	76	0.0285283	0.262033	0.03,0.061,0.0	0.0,0.0,0.0	0.03
ENSG00000110046	ATG2A	11	-	64676742	64676839	64677152	64677396	64675219	64675362	64677511	64677667	0,0,2	4,1,3	3,2,4	1,0,0	76	76	0.0287367	0.262619	0.0,0.0,0.4	0.75,1.0,1.0	-0.783
ENSG00000196950	SLC39A10	2	+	196548422	196548630	196571339	196571509	196545616	196545774	196573379	196573568	24,34,30	97106149	32,39,42	219235208	76	76	0.0288183	0.26295	0.198,0.243,0.168	0.127,0.142,0.168	0.057
ENSG00000115307	AUP1	2	-	74754374	74754490	74754597	74754717	74754067	74754186	74754862	74754965	199232200	117137112	280348419	223294263	76	76	0.0290321	0.264484	0.63,0.629,0.641	0.557,0.542,0.614	0.062
ENSG00000234741	GAS5	1	-	173834366	173834420	173834647	173834685	173833038	173833442	173834994	173835032	28,36,66	0,2,2	121,87,88	0,0,1	58	70	0.0291934	0.265186	1.0,0.956,0.976	1.0,1.0,0.991	-0.02
ENSG00000127022	CANX	5	+	179149804	179150020	179150660	179150780	179147404	179147561	179151657	179151784	842886829	436434522	133910571029	526508472	76	76	0.0292007	0.265186	0.659,0.671,0.614	0.718,0.675,0.686	-0.045
ENSG00000075711	DLG1	3	-	196812166	196812627	196817782	196817897	196807921	196807988	196831773	196831876	21,23,20	1,0,0	89,95,124	0,0,0	76	76	0.0294034	0.26661	0.955,1.0,1.0	1.0,1.0,1.0	-0.015
ENSG00000112996	MRPS30	5	+	44812016	44812122	44813207	44813384	44811110	44811256	44815014	44815624	31,30,15	42,51,40	241259308	280321313	76	76	0.0296175	0.268131	0.425,0.37,0.273	0.463,0.447,0.496	-0.113
ENSG00000103021	CCDC113	16	+	58286630	58286757	58287901	58288063	58283862	58284019	58292271	58292427	0,1,2	1,5,4	4,3,1	31,38,31	76	76	0.0297155	0.268598	0.0,0.167,0.333	0.114,0.073,0.031	0.094
ENSG00000076604	TRAF4	17	+	27074839	27074965	27075034	27075196	27074230	27074282	27075279	27075344	1,0,1	8,10,11	3,2,3	91,93,95	76	76	0.029871	0.269584	0.111,0.0,0.083	0.032,0.021,0.031	0.037
ENSG00000165733	BMS1	10	+	43297584	43297666	43312046	43312120	43293915	43294073	43312765	43312942	9,12,13	14,11,21	24,28,27	63,54,85	76	76	0.0299293	0.26969	0.391,0.522,0.382	0.276,0.341,0.241	0.146
ENSG00000086061	DNAJA1	9	+	33026810	33026988	33030437	33030665	33026472	33026614	33034213	33034328	3,0,3	20,18,32	27,36,29	126105112	76	76	0.0300086	0.269984	0.13,0.0,0.086	0.176,0.255,0.206	-0.14
ENSG00000182718	ANXA2	15	-	60682411	60682516	60688349	60688626	60678226	60678285	60690141	60690185	5,6,6	9,5,6	16,11,14	4,6,6	76	76	0.0303411	0.271889	0.357,0.545,0.5	0.8,0.647,0.7	-0.248
ENSG00000119333	WDR34	9	-	131396504	131396662	131396967	131397200	131395939	131396261	131397370	131397538	20,41,36	64,63,59	147,134,96	90172152	76	76	0.0303228	0.271889	0.238,0.394,0.379	0.62,0.438,0.387	-0.145
ENSG00000164535	DAGLB	7	-	6461357	6461435	6485583	6485735	6456471	6456552	6487378	6487565	14,16,13	8,4,2	20,16,20	14,28,12	76	76	0.0303611	0.271889	0.636,0.8,0.867	0.588,0.364,0.625	0.242
ENSG00000117139	KDM5B	1	-	202742245	202742416	202743740	202743863	202725485	202725644	202746144	202746222	11,3,12	3,3,2	18,23,22	2,2,0	76	76	0.0305359	0.273033	0.786,0.5,0.857	0.9,0.92,1.0	-0.226
ENSG00000161813	LARP4	12	+	50829270	50829407	50831517	50831621	50824277	50824353	50834221	50834332	6,4,7	12,12,21	38,22,22	113133170	76	76	0.0305838	0.273039	0.333,0.25,0.25	0.252,0.142,0.115	0.108
ENSG00000134644	PUM1	1	-	31441200	31441339	31501642	31501711	31440013	31440157	31532050	31532424	7,8,10	0,1,4	19,15,19	15,15,12	76	76	0.0306576	0.273277	1.0,0.889,0.714	0.559,0.5,0.613	0.31
ENSG00000169241	SLC50A1	1	+	155109303	155109427	155110036	155110198	155108774	155108852	155110454	155110574	12,10,13	37,42,42	41,28,33	65,70,66	76	76	0.0308411	0.27449	0.245,0.192,0.236	0.387,0.286,0.333	-0.111
ENSG00000205581	HMGN1	21	-	40717755	40717884	40719172	40719218	40717071	40717200	40720217	40720265	4,8,8	4,10,9	8,9,4	26,23,10	76	76	0.0309586	0.275071	0.5,0.444,0.471	0.235,0.281,0.286	0.204
ENSG00000122376	FAM35A	10	+	88935645	88935852	88939831	88940060	88930596	88930731	88946841	88946957	1,0,0	2,4,10	0,0,0	36,32,30	76	76	0.0310013	0.275071	0.333,0.0,0.0	0.0,0.0,0.0	0.111
ENSG00000136603	SKIL	3	+	170099031	170099129	170102320	170102553	170078155	170079217	170108010	170108252	2,0,1	7,4,8	0,0,1	29,19,23	76	76	0.0312023	0.276432	0.222,0.0,0.111	0.0,0.0,0.042	0.097
ENSG00000015171	ZMYND11	10	+	283524	283617	285377	285465	282777	282855	285995	286051	9,16,10	14,17,13	63,55,53	42,40,37	76	76	0.0313067	0.276933	0.391,0.485,0.435	0.6,0.579,0.589	-0.152
ENSG00000173588	CCDC41	12	-	94761569	94761719	94769661	94769793	94729364	94729440	94772566	94772818	2,2,3	2,4,3	3,3,4	22,14,13	76	76	0.031623	0.27864	0.5,0.333,0.5	0.12,0.176,0.235	0.267
ENSG00000078304	PPP2R5C	14	+	102368055	102368226	102372738	102372866	102360843	102360897	102375925	102376027	96,99,87	27,21,31	271253290	57,54,46	76	76	0.0316402	0.27864	0.78,0.825,0.737	0.826,0.824,0.863	-0.057
ENSG00000137074	APTX	9	-	32987757	32987840	32988080	32988122	32985968	32986028	32989756	32989893	4,5,1	1,0,0	25,23,26	0,1,0	72	76	0.031644	0.27864	0.809,1.0,1.0	1.0,0.96,1.0	-0.05
ENSG00000151923	TIAL1	10	-	121341680	121341735	121341970	121342069	121339446	121339522	121347663	121347760	2,3,6	0,0,3	21,20,19	2,0,0	76	76	0.0317793	0.279407	1.0,1.0,0.667	0.913,1.0,1.0	-0.082
ENSG00000086061	DNAJA1	9	+	33026810	33026988	33030437	33030665	33025208	33025381	33034213	33034328	1,0,0	18,14,29	1,0,0	126105112	76	76	0.0319447	0.280436	0.053,0.0,0.0	0.008,0.0,0.0	0.015
ENSG00000233016	SNHG7	9	-	139619506	139619562	139620762	139620868	139618348	139618452	139621497	139621538	5,5,7	2,1,0	89,71,81	5,3,9	73	73	0.0320349	0.280802	0.714,0.833,1.0	0.947,0.959,0.9	-0.086
ENSG00000132300	PTCD3	2	+	86361961	86362110	86364104	86364263	86361414	86361500	86364591	86369280	6,12,17	8,13,14	54,47,43	25,23,28	76	76	0.0322567	0.281046	0.429,0.48,0.548	0.684,0.671,0.606	-0.168
ENSG00000215301	DDX3X	X	+	41202989	41203075	41203282	41203381	41201747	41201906	41203491	41203652	1,0,0	28,26,26	0,0,1	303340240	76	76	0.0322545	0.281046	0.034,0.0,0.0	0.0,0.0,0.004	0.01
ENSG00000009335	UBE3C	7	+	156961741	156961816	156962997	156963144	156956503	156956557	156967612	156967728	11,17,23	22,20,26	76,58,47	45,45,46	76	76	0.0321463	0.281046	0.333,0.459,0.469	0.628,0.563,0.505	-0.145
ENSG00000164535	DAGLB	7	-	6474392	6474651	6475992	6476164	6472467	6472590	6485583	6485735	5,10,8	1,5,0	35,50,33	34,46,28	76	76	0.0322396	0.281046	0.833,0.667,1.0	0.507,0.521,0.541	0.31
ENSG00000156976	EIF4A2	3	+	186502352	186502485	186503671	186503840	186502220	186502266	186503952	186504062	10,16,22	74,50,67	67,49,36	151,92,115	76	76	0.0327785	0.284881	0.119,0.242,0.247	0.307,0.348,0.238	-0.095
ENSG00000076242	MLH1	3	+	37061800	37061954	37067127	37067498	37053501	37053590	37070274	37070423	1,2,0	21,18,14	0,1,0	64,47,43	76	76	0.0327952	0.284881	0.045,0.1,0.0	0.0,0.021,0.0	0.041
ENSG00000116750	UCHL5	1	-	192989436	192989511	192990226	192990325	192987534	192987950	192992055	192992166	29,39,47	4,8,4	148141123	6,13,11	76	76	0.0328574	0.284994	0.879,0.83,0.922	0.961,0.916,0.918	-0.055
ENSG00000135148	TRAFD1	12	+	112572541	112572677	112572816	112572870	112568314	112568373	112578622	112578784	5,6,4	0,1,2	84,86,127	9,8,7	76	76	0.0329339	0.28523	1.0,0.857,0.667	0.903,0.915,0.948	-0.081
ENSG00000051825	MPHOSPH9	12	-	123699290	123699381	123702945	123703046	123694602	123694709	123705918	123706394	11,15,9	5,8,8	67,59,64	21,17,19	76	76	0.0336095	0.290647	0.688,0.652,0.529	0.761,0.776,0.771	-0.146
ENSG00000164327	RICTOR	5	-	38942934	38943073	38944547	38944671	38938020	38942480	38945014	38945170	1,4,1	2,5,3	63,73,71	32,33,43	76	76	0.0336781	0.290806	0.333,0.444,0.25	0.663,0.689,0.623	-0.316
ENSG00000138101	DTNB	2	-	25678273	25678363	25705664	25705742	25674416	25674504	25754341	25754466	2,2,3	1,0,4	11,11,12	0,2,0	76	76	0.0337495	0.290989	0.667,1.0,0.429	1.0,0.846,1.0	-0.25
ENSG00000257076	NA	12	-	123699290	123699381	123702922	123703046	123694602	123694709	123705918	123706442	13,15,10	5,8,8	69,67,68	21,17,19	76	76	0.033914	0.291146	0.722,0.652,0.556	0.767,0.798,0.782	-0.139
ENSG00000143458	GABPB2	1	+	151062881	151063049	151065667	151065862	151060945	151060993	151070327	151070478	1,1,0	9,3,2	0,1,0	21,24,24	76	76	0.0339184	0.291146	0.1,0.25,0.0	0.0,0.04,0.0	0.103
ENSG00000196352	CD55	1	+	207510673	207510754	207512741	207512762	207510037	207510163	207532890	207534311	121713051038	81,68,136	279323902384	158144136	76	30	0.0339096	0.291146	0.856,0.883,0.751	0.875,0.868,0.874	-0.042
ENSG00000138069	RAB1A	2	-	65318116	65318212	65325104	65325200	65316072	65316204	65331867	65331940	6,8,4	17,27,25	17,14,12	101107102	76	76	0.0340443	0.291794	0.261,0.229,0.138	0.144,0.116,0.105	0.088
ENSG00000142798	HSPG2	1	-	22179411	22179563	22180685	22180836	22179192	22179325	22181103	22181258	22,25,22	8,10,7	55,77,44	5,17,11	76	76	0.0341168	0.291983	0.733,0.714,0.759	0.917,0.819,0.8	-0.11
ENSG00000103194	USP10	16	+	84767040	84767109	84778238	84779279	84733554	84733717	84792321	84792413	0,0,1	2,3,1	1,0,0	24,14,24	76	76	0.0344903	0.294744	0.0,0.0,0.5	0.04,0.0,0.0	0.153
ENSG00000028310	BRD9	5	-	881221	881297	884052	884185	879908	880004	886706	886822	6,7,9	1,0,0	48,43,39	0,0,1	76	76	0.0346322	0.295522	0.857,1.0,1.0	1.0,1.0,0.975	-0.039
ENSG00000113810	SMC4	3	+	160135510	160135744	160137145	160137331	160134038	160134203	160138527	160138689	13,21,13	52,56,68	100,67,82	477493424	76	76	0.0347241	0.29587	0.2,0.273,0.16	0.173,0.12,0.162	0.059
ENSG00000161203	AP2M1	3	+	183898872	183899014	183899483	183899603	183898636	183898772	183899699	183899835	224255252	473522614	262338248	496476498	76	76	0.0348119	0.296182	0.321,0.328,0.291	0.346,0.415,0.332	-0.051
ENSG00000139116	KIF21A	12	-	39709733	39709772	39711874	39712003	39705218	39705355	39713707	39713815	2,1,1	1,0,0	35,33,18	2,1,2	76	66	0.0349544	0.296959	0.635,1.0,1.0	0.938,0.966,0.887	-0.052
ENSG00000101665	SMAD7	18	-	46468850	46468925	46474753	46474807	46446222	46448280	46476181	46477081	4,5,1	2,1,0	29,18,33	2,3,1	76	76	0.0352299	0.298861	0.667,0.833,1.0	0.935,0.857,0.971	-0.088
ENSG00000078674	PCM1	8	+	17810478	17810695	17812978	17813162	17804694	17804872	17814112	17814286	2,1,1	6,1,4	1,2,0	24,13,11	76	76	0.0353743	0.299647	0.25,0.5,0.2	0.04,0.133,0.0	0.259
ENSG00000234741	GAS5	1	-	173834366	173834420	173835665	173835705	173833038	173833442	173835898	173835934	15,18,23	1,0,2	57,61,38	1,0,0	60	68	0.0354836	0.300134	0.944,1.0,0.929	0.985,1.0,1.0	-0.037
ENSG00000163832	C3orf75	3	-	47545819	47545938	47551673	47551744	47543139	47543341	47552637	47552716	4,4,12	2,7,5	52,65,41	99100111	76	76	0.0360049	0.304099	0.667,0.364,0.706	0.344,0.394,0.27	0.243
ENSG00000132155	RAF1	3	-	12645634	12645788	12660013	12660246	12641189	12641307	12705311	12705616	11,9,11	0,3,0	25,44,25	0,0,0	76	76	0.0361788	0.304819	1.0,0.75,1.0	1.0,1.0,1.0	-0.083
ENSG00000067955	CBFB	16	+	67100584	67100701	67116115	67116242	67070541	67070658	67132612	67134961	10,8,6	16,20,25	24,11,18	93,78,83	76	76	0.0361953	0.304819	0.385,0.286,0.194	0.205,0.124,0.178	0.119
ENSG00000165688	PMPCA	9	+	139307261	139307344	139309004	139309099	139306941	139307021	139310742	139310843	13,19,31	74,67,58	30,45,20	163195144	76	76	0.0362952	0.305014	0.149,0.221,0.348	0.155,0.187,0.122	0.085
ENSG00000088766	CRLS1	20	+	5990420	5990558	5996006	5996136	5986735	5987198	6011930	6012016	2,2,3	6,8,9	1,2,1	29,12,16	76	76	0.0363237	0.305014	0.25,0.2,0.25	0.033,0.143,0.059	0.155
ENSG00000151414	NEK7	1	+	198233254	198233365	198248083	198248191	198201682	198201767	198262074	198262169	1,0,1	5,15,11	0,1,0	42,39,46	76	76	0.0365288	0.305472	0.167,0.0,0.083	0.0,0.025,0.0	0.075
ENSG00000120256	LRP11	6	-	150147399	150147495	150157220	150157433	150141075	150141839	150158473	150158599	33,24,39	5,9,3	46,63,41	5,3,2	76	76	0.036502	0.305472	0.868,0.727,0.929	0.902,0.955,0.953	-0.095
ENSG00000119487	MAPKAP1	9	-	128268588	128268696	128305337	128305447	128246721	128246862	128321911	128322088	61,73,78	27,14,25	163148111	84,64,57	76	76	0.0367271	0.305472	0.693,0.839,0.757	0.66,0.698,0.661	0.09
ENSG00000037474	NSUN2	5	-	6620218	6620411	6631985	6632090	6616839	6616970	6632711	6632869	16,28,38	0,0,3	81,56,42	0,0,0	76	76	0.0366823	0.305472	1.0,1.0,0.927	1.0,1.0,1.0	-0.024
ENSG00000164327	RICTOR	5	-	39021140	39021238	39074212	39074260	39003659	39003724	39074430	39074491	1,0,1	6,8,9	1,0,3	52,43,51	76	76	0.0365855	0.305472	0.143,0.0,0.1	0.019,0.0,0.056	0.056
ENSG00000136699	SMPD4	2	-	130925030	130925163	130932486	130932573	130921946	130922018	130934126	130934210	1,9,8	0,3,4	75,76,67	10,11,11	76	76	0.0367473	0.305472	1.0,0.75,0.667	0.882,0.874,0.859	-0.066
ENSG00000198431	TXNRD1	12	+	104705067	104705190	104707022	104707095	104682708	104682818	104709554	104709674	78109103	139182209	489440317	626509570	76	76	0.0366429	0.305472	0.359,0.375,0.33	0.439,0.464,0.357	-0.065
ENSG00000117697	NSL1	1	-	212912875	212912943	212939530	212939615	212910984	212912028	212955713	212955768	0,4,4	4,3,3	8,2,7	43,35,31	76	76	0.0368448	0.305844	0.0,0.571,0.571	0.157,0.054,0.184	0.249
ENSG00000068912	ERLEC1	2	+	54035435	54035597	54036350	54036410	54028849	54028979	54040085	54040210	17,22,19	17,26,18	72,45,42	99,93,75	76	76	0.0369801	0.306527	0.5,0.458,0.514	0.421,0.326,0.359	0.122
ENSG00000042429	MED17	11	+	93530700	93530885	93542882	93543042	93529575	93529706	93545018	93545564	2,1,3	1,2,2	41,29,32	8,11,4	76	76	0.0370462	0.306636	0.667,0.333,0.6	0.837,0.725,0.889	-0.284
ENSG00000142949	PTPRF	1	+	44063418	44063724	44064390	44064584	44058127	44058272	44069086	44069204	40,46,36	41,49,50	51,50,56	31,51,33	76	76	0.0371985	0.307458	0.494,0.484,0.419	0.622,0.495,0.629	-0.116
ENSG00000166925	TSC22D4	7	-	100071896	100072063	100074899	100075082	100065174	100065223	100076416	100076855	0,2,2	8,6,1	10,5,5	70,102,80	76	76	0.037287	0.307751	0.0,0.25,0.667	0.125,0.047,0.059	0.229
ENSG00000170832	USP32	17	-	58348710	58348842	58365883	58366043	58346810	58346918	58372043	58372162	3,1,4	5,5,5	9,6,9	53,37,34	76	76	0.0374914	0.30812	0.375,0.167,0.444	0.145,0.14,0.209	0.164
ENSG00000050426	LETMD1	12	+	51447560	51447643	51449926	51450028	51442816	51442968	51450132	51450285	3,5,4	17,15,9	5,7,9	44,60,55	76	76	0.0374421	0.30812	0.15,0.25,0.308	0.102,0.104,0.141	0.12
ENSG00000163918	RFC4	3	-	186509513	186509639	186510278	186510399	186507930	186508044	186510592	186510736	3,4,6	0,0,1	120100106	4,6,6	76	76	0.0373973	0.30812	1.0,1.0,0.857	0.968,0.943,0.946	0
ENSG00000067955	CBFB	16	+	67100584	67100701	67116115	67116242	67063629	67063716	67132612	67134961	0,1,3	15,21,24	3,1,2	94,78,83	76	76	0.0379246	0.31124	0.0,0.045,0.111	0.031,0.013,0.024	0.029
ENSG00000075914	EXOSC7	3	+	45048911	45049067	45052726	45052885	45046782	45046906	45053674	45054125	12,11,41	0,0,0	59,68,53	6,10,11	76	76	0.0380112	0.311509	1.0,1.0,1.0	0.908,0.872,0.828	0.131
ENSG00000111481	COPZ1	12	+	54737008	54737100	54739243	54739299	54735989	54736071	54741550	54741628	133140188	70,82,63	246211247	155179132	76	76	0.0382044	0.31265	0.655,0.631,0.749	0.613,0.541,0.652	0.076
ENSG00000172534	HCFC1	X	-	153217039	153217158	153217291	153217609	153216800	153216938	153217964	153218409	3,3,3	14,25,29	2,4,2	30,62,72	76	76	0.0389486	0.317641	0.176,0.107,0.094	0.063,0.061,0.027	0.075
ENSG00000133302	ANKRD32	5	+	93987406	93987550	93990334	93990457	93985158	93985302	93998002	93998056	14,20,14	22,26,30	111,82,74	191263255	76	76	0.0389458	0.317641	0.389,0.435,0.318	0.368,0.238,0.225	0.104
ENSG00000169032	MAP2K1	15	+	66729083	66729230	66735617	66735695	66727364	66727575	66736993	66737045	3,12,5	1,0,1	37,32,33	2,0,0	76	76	0.0389788	0.317641	0.75,1.0,0.833	0.949,1.0,1.0	-0.122
ENSG00000070915	SLC12A3	16	+	56914041	56914165	56916307	56916409	56913453	56913561	56917960	56918116	40,26,51	53,86,74	67110105	264311238	76	76	0.0392917	0.319023	0.43,0.232,0.408	0.202,0.261,0.306	0.1
ENSG00000075702	WDR62	19	+	36582101	36582213	36582303	36582367	36581346	36581422	36583590	36583713	3,4,11	3,4,6	16,19,8	36,27,17	76	76	0.0393135	0.319023	0.5,0.5,0.647	0.308,0.413,0.32	0.202
ENSG00000110422	HIPK3	11	+	33307958	33309057	33350055	33350179	33279132	33279435	33358620	33358740	1,3,5	16,20,17	7,9,4	81,97,78	76	76	0.03926	0.319023	0.059,0.13,0.227	0.08,0.085,0.049	0.067
ENSG00000158773	USF1	1	-	161012622	161012672	161013057	161013150	161012375	161012460	161015647	161015757	11,7,8	23,41,35	22,22,19	38,47,36	76	76	0.0394432	0.319628	0.324,0.146,0.186	0.367,0.319,0.345	-0.125
ENSG00000213240	NOTCH2NL	1	+	145248812	145248894	145273184	145273444	145209118	145209436	145281368	145281704	19,20,22	31,23,19	19,35,29	50,66,52	76	76	0.0396237	0.320195	0.38,0.465,0.537	0.275,0.347,0.358	0.134
ENSG00000196531	NACA	12	-	57107320	57107467	57108145	57108223	57106845	57106974	57108385	57108471	123915131430	102810711277	203422951723	134514031299	76	76	0.0395811	0.320195	0.547,0.586,0.528	0.602,0.621,0.57	-0.044
ENSG00000213593	TMX2	11	+	57505307	57505498	57505825	57505902	57505079	57505140	57506135	57506242	0,1,0	21,19,19	12,8,6	43,36,61	76	76	0.0399493	0.322376	0.0,0.05,0.0	0.218,0.182,0.09	-0.147
ENSG00000137804	NUSAP1	15	+	41663724	41663882	41667909	41668026	41657602	41657787	41669393	41669502	19,14,17	90,104,82	107130119	861956945	76	76	0.0403425	0.325097	0.174,0.119,0.172	0.111,0.12,0.112	0.041
ENSG00000134333	LDHA	11	+	18424386	18424560	18425240	18425358	18420977	18421095	18426995	18427119	8,9,5	0,2,0	2,1,1	0,0,3	76	76	0.0405083	0.325727	1.0,0.818,1.0	1.0,1.0,0.25	0.189
ENSG00000157796	WDR19	4	+	39187345	39187437	39188158	39188224	39184148	39184183	39191275	39191401	0,0,1	9,4,7	1,0,1	37,48,47	67	67	0.0405331	0.325727	0.0,0.0,0.125	0.026,0.0,0.021	0.026
ENSG00000198815	FOXJ3	1	-	42730785	42730860	42744018	42744343	42693553	42693637	42776720	42776781	7,1,1	6,4,2	12,8,7	46,41,26	76	76	0.0410332	0.329034	0.538,0.2,0.333	0.207,0.163,0.212	0.163
ENSG00000070501	POLB	8	+	42207524	42207583	42211934	42212039	42206533	42206608	42213033	42213085	3,3,1	2,7,2	11,6,10	5,1,3	76	76	0.0410582	0.329034	0.6,0.3,0.333	0.688,0.857,0.769	-0.36
ENSG00000116688	MFN2	1	+	12062038	12062160	12064048	12064175	12057353	12057478	12064565	12064670	0,1,0	25,33,24	1,0,0	133142144	76	76	0.0414859	0.332002	0.0,0.029,0.0	0.007,0.0,0.0	0.007
ENSG00000101474	C20orf3	20	-	24945010	24945034	24949527	24949720	24943560	24944658	24950161	24950296	64,67,66	1,2,1	130,113,96	0,0,0	76	36	0.0418383	0.334281	0.968,0.941,0.969	1.0,1.0,1.0	-0.041
ENSG00000142687	KIAA0319L	1	-	35936463	35936561	35940405	35940507	35932208	35932296	35944566	35944813	1,1,5	20,19,19	3,2,1	49,55,53	76	76	0.0418861	0.334281	0.048,0.05,0.208	0.058,0.035,0.019	0.065
ENSG00000002586	CD99	X	+	2632462	2632495	2635645	2635693	2609320	2609468	2637701	2637746	20,21,18	119133111	11,26,15	168175158	54	76	0.0419508	0.334337	0.191,0.182,0.186	0.084,0.173,0.118	0.061
ENSG00000067955	CBFB	16	+	67100584	67100701	67116115	67116211	67063629	67063716	67132612	67134956	0,1,3	19,15,15	3,1,2	76,64,71	76	76	0.0422295	0.336096	0.0,0.063,0.167	0.038,0.015,0.027	0.05
ENSG00000114850	SSR3	3	-	156266693	156266792	156271443	156271570	156261742	156262228	156272745	156272906	91101113	31,26,41	182138149	56,25,24	76	76	0.0427879	0.339607	0.746,0.795,0.734	0.765,0.847,0.861	-0.066
ENSG00000158417	EIF5B	2	+	99976698	99976824	99977610	99978283	99953815	99954052	99980107	99980325	3,2,5	11,22,17	9,3,3	72,53,46	76	76	0.0427505	0.339607	0.214,0.083,0.227	0.111,0.054,0.061	0.099
ENSG00000204569	PPP1R10	6	-	30575616	30575668	30576555	30576691	30574555	30574633	30576853	30576940	13,11,17	2,2,0	48,57,44	22,15,19	76	76	0.0428488	0.339625	0.867,0.846,1.0	0.686,0.792,0.698	0.179
ENSG00000130164	LDLR	19	+	11231045	11231198	11233849	11234020	11230767	11230909	11238683	11238761	1,0,3	1,3,2	19,15,15	97106102	76	76	0.0431667	0.341554	0.5,0.0,0.6	0.164,0.124,0.128	0.228
ENSG00000113141	IK	5	+	140034265	140034312	140035413	140035577	140034100	140034171	140037138	140037247	3,0,1	71,93,74	1,0,0	138210267	76	76	0.043263	0.341554	0.041,0.0,0.013	0.007,0.0,0.0	0.016
ENSG00000234741	GAS5	1	-	173834647	173834685	173835665	173835705	173833037	173833213	173835898	173835934	13,18,24	0,2,0	57,61,37	0,0,0	60	56	0.0432691	0.341554	1.0,0.894,1.0	1.0,1.0,1.0	-0.035
ENSG00000136811	ODF2	9	+	131231461	131231632	131233586	131233747	131223220	131223346	131235191	131235321	20,25,26	15,27,17	38,78,63	107,82,74	76	76	0.0434628	0.342105	0.571,0.481,0.605	0.262,0.487,0.46	0.149
ENSG00000134352	IL6ST	5	-	55248077	55248179	55250637	55250820	55247756	55247903	55251852	55252063	37,56,50	36,35,21	45,63,73	59,58,71	76	76	0.0435159	0.342105	0.507,0.615,0.704	0.433,0.521,0.507	0.122
ENSG00000101680	LAMA1	18	-	7007137	7007275	7008486	7008607	7002262	7002384	7009237	7009365	130143140	30,29,33	553591484	67,114,88	76	76	0.0434759	0.342105	0.813,0.831,0.809	0.892,0.838,0.846	-0.041
ENSG00000177830	CHID1	11	-	884067	884169	893426	893519	883147	883303	899339	899401	12,6,8	27,28,18	7,4,4	23,35,40	76	76	0.0435781	0.342129	0.308,0.176,0.308	0.233,0.103,0.091	0.122
ENSG00000111358	GTF2H3	12	+	124139470	124139545	124140317	124140371	124137253	124137282	124144062	124144131	15,11,26	13,8,12	45,42,37	77,31,55	61	61	0.0437604	0.34217	0.536,0.579,0.684	0.369,0.575,0.402	0.151
ENSG00000142798	HSPG2	1	-	22206599	22206747	22206855	22207052	22205486	22205614	22207148	22207328	7,9,8	18,27,26	16,10,3	66,56,40	76	76	0.0437162	0.34217	0.28,0.25,0.235	0.195,0.152,0.07	0.116
ENSG00000185324	CDK10	16	+	89753996	89754223	89755659	89755732	89753077	89753167	89756960	89757032	1,0,2	3,3,6	4,9,3	57,59,47	76	76	0.0437162	0.34217	0.25,0.0,0.25	0.066,0.132,0.06	0.081
ENSG00000105538	RASIP1	19	-	49230041	49230145	49230649	49230687	49227973	49228217	49232193	49232847	15,38,21	75,63,75	56,88,50	109131102	64	76	0.0438963	0.342769	0.192,0.417,0.25	0.379,0.444,0.368	-0.111
ENSG00000059588	TARBP1	1	-	234534127	234534299	234536598	234536694	234529391	234529583	234536926	234537008	0,0,0	22,34,48	4,7,7	65,73,68	76	76	0.0440423	0.342985	0.0,0.0,0.0	0.058,0.087,0.093	-0.079
ENSG00000148634	HERC4	10	-	69792534	69792626	69793721	69793943	69785302	69785433	69797849	69797926	90111105	12,15,15	290330352	108,75,43	76	76	0.0440231	0.342985	0.882,0.881,0.875	0.729,0.815,0.891	0.068
ENSG00000131373	HACL1	3	-	15624383	15624496	15631046	15631119	15621416	15621552	15633106	15633187	7,5,6	9,10,9	23,17,16	11,9,17	76	76	0.0441998	0.34375	0.438,0.333,0.4	0.676,0.654,0.485	-0.215
ENSG00000163832	C3orf75	3	-	47545819	47545937	47551673	47551744	47543139	47543341	47552637	47552716	4,4,12	2,7,5	52,65,41	93,96,110	76	76	0.0444939	0.345574	0.667,0.364,0.706	0.359,0.404,0.272	0.234
ENSG00000100644	HIF1A	14	+	62207222	62207345	62207472	62207906	62204804	62205091	62211422	62211531	74,79,57	68,63,62	480490535	432292310	76	76	0.0449084	0.348326	0.521,0.556,0.479	0.526,0.627,0.633	-0.077
ENSG00000082898	XPO1	2	-	61717776	61717911	61719169	61719333	61715722	61715906	61719459	61719616	9,12,4	28,39,31	58,55,59	374360353	76	76	0.0450894	0.349159	0.243,0.235,0.114	0.134,0.133,0.143	0.061
ENSG00000168724	DNAJC21	5	+	34944971	34945130	34945865	34945908	34941200	34941288	34949647	34949782	26,30,37	3,4,1	143131113	3,5,8	76	74	0.0451364	0.349159	0.894,0.88,0.973	0.979,0.962,0.932	-0.042
ENSG00000101199	ARFGAP1	20	+	61912642	61912699	61914170	61914203	61910250	61910347	61916217	61916274	3,2,4	1,2,0	15,20,19	35,31,30	76	54	0.04531	0.349569	0.681,0.415,1.0	0.233,0.314,0.31	0.413
ENSG00000135899	SP110	2	-	231067294	231067444	231072705	231072774	231065600	231065681	231074645	231074723	3,2,4	1,1,1	9,9,2	9,13,16	76	76	0.0452863	0.349569	0.75,0.667,0.8	0.5,0.409,0.111	0.399
ENSG00000185480	PARPBP	12	+	102569260	102569444	102576326	102576405	102559506	102559661	102589728	102591139	9,10,11	15,12,15	43,28,28	32,17,26	76	76	0.045823	0.353056	0.375,0.455,0.423	0.573,0.622,0.519	-0.154
ENSG00000179335	CLK3	15	+	74918142	74918309	74919692	74919787	74917242	74917359	74919879	74920009	8,18,12	23,22,20	21,24,21	82,66,56	76	76	0.0460425	0.354276	0.258,0.45,0.375	0.204,0.267,0.273	0.113
ENSG00000234741	GAS5	1	-	173834994	173835032	173835665	173835705	173834366	173834420	173835898	173835934	14,19,23	0,3,0	57,61,37	0,0,1	60	56	0.046187	0.354917	1.0,0.855,1.0	1.0,1.0,0.972	-0.039
ENSG00000044459	CNTLN	9	+	17273730	17273864	17309055	17309250	17236406	17236586	17330629	17330806	0,1,1	3,5,5	17,13,12	17,12,16	76	76	0.0465491	0.357226	0.0,0.167,0.167	0.5,0.52,0.429	-0.372
ENSG00000182718	ANXA2	15	-	60682411	60682516	60688478	60688626	60678226	60678285	60689456	60689537	2,8,4	11,5,10	11,19,13	6,10,9	76	76	0.0467582	0.357883	0.154,0.615,0.286	0.647,0.655,0.591	-0.279
ENSG00000149182	ARFGAP2	11	-	47193831	47193884	47197401	47197474	47193214	47193351	47198066	47198185	0,0,1	3,3,8	2,1,1	47,44,35	76	76	0.0466981	0.357883	0.0,0.0,0.111	0.041,0.022,0.028	0.007
ENSG00000169174	PCSK9	1	+	55524171	55524320	55525158	55525336	55523003	55523187	55527047	55527229	1,0,0	6,2,5	0,1,0	22,30,19	76	76	0.0468314	0.35797	0.143,0.0,0.0	0.0,0.032,0.0	0.037
ENSG00000023445	BIRC3	11	+	102199627	102199676	102201729	102201972	102198782	102198861	102206696	102206951	1,2,3	4,5,5	24,31,34	18,28,21	76	76	0.0471043	0.359581	0.2,0.286,0.375	0.571,0.525,0.618	-0.284
ENSG00000166012	TAF1D	11	-	93465409	93465457	93467790	93467826	93463842	93463878	93469306	93469470	15,15,17	1,2,0	77,50,40	2,0,1	52	68	0.0472046	0.359766	0.951,0.907,1.0	0.981,1.0,0.981	-0.035
ENSG00000115761	NOL10	2	-	10794606	10794673	10797867	10798017	10784445	10784498	10799297	10799376	3,8,9	17,27,29	20,17,9	91102106	76	76	0.0477896	0.359766	0.15,0.229,0.237	0.18,0.143,0.078	0.072
ENSG00000100934	SEC23A	14	-	39536376	39536500	39543618	39543734	39534116	39534197	39545138	39545297	88,90,101	91,82,113	122165128	234193155	76	76	0.0478115	0.359766	0.492,0.523,0.472	0.343,0.461,0.452	0.077
ENSG00000198176	TFDP1	13	+	114277494	114277601	114285937	114286059	114265310	114265377	114287434	114287600	29,27,18	7,5,4	86100125	16,10,11	76	76	0.0477528	0.359766	0.806,0.844,0.818	0.843,0.909,0.919	-0.068
ENSG00000083720	OXCT1	5	-	41749628	41749709	41762212	41762302	41739491	41739593	41794104	41794180	227268207	172174165	367359331	200213203	76	76	0.0476356	0.359766	0.569,0.606,0.556	0.647,0.628,0.62	-0.055
ENSG00000153914	SREK1	5	+	65465878	65465998	65466412	65466775	65440142	65440365	65470773	65470869	0,1,2	7,9,3	1,1,1	36,24,30	76	76	0.047647	0.359766	0.0,0.1,0.4	0.027,0.04,0.032	0.134
ENSG00000165458	INPPL1	11	+	71940133	71940274	71940508	71940602	71939770	71939891	71940967	71941063	24,26,33	2,0,1	72,77,103	2,0,0	76	76	0.0473685	0.359766	0.923,1.0,0.971	0.973,1.0,1.0	-0.026
ENSG00000117479	SLC19A2	1	-	169437881	169438074	169446392	169446995	169437348	169437490	169454800	169455241	0,2,3	1,3,5	7,14,12	49,58,77	76	76	0.047718	0.359766	0.0,0.4,0.375	0.125,0.194,0.135	0.107
ENSG00000087470	DNM1L	12	+	32860300	32860347	32861086	32861158	32854348	32854496	32863862	32863949	61,71,75	18,17,27	232227215	47,52,41	76	76	0.0472657	0.359766	0.772,0.807,0.735	0.832,0.814,0.84	-0.057
ENSG00000153113	CAST	5	+	96063192	96063234	96065315	96065429	96058342	96058402	96071875	96071944	66,77,78	43,56,41	174193189	75,73,110	72	76	0.0475356	0.359766	0.618,0.592,0.668	0.71,0.736,0.645	-0.071
ENSG00000187957	DNER	2	-	230271947	230272061	230282823	230282946	230252980	230253112	230312031	230312153	25,29,17	117125124	27,33,33	88118119	76	76	0.0475459	0.359766	0.176,0.188,0.121	0.235,0.219,0.217	-0.062
ENSG00000181143	MUC16	19	-	8973971	8974102	8982156	8982329	8973548	8973616	8987044	8987112	2,3,1	4,4,2	0,8,2	18,22,14	76	76	0.0480093	0.360786	0.333,0.429,0.333	0.0,0.267,0.125	0.234
ENSG00000146733	PSPH	7	-	56084926	56085072	56087292	56087427	56078760	56079562	56088765	56088924	3,5,1	0,0,2	31,31,16	4,1,1	76	76	0.0481917	0.361169	1.0,1.0,0.333	0.886,0.969,0.941	-0.154
ENSG00000164414	SLC35A1	6	+	88216099	88216166	88218137	88218314	88210875	88211028	88218758	88218893	1,2,1	1,1,1	4,6,7	20,15,23	76	76	0.0483096	0.361169	0.5,0.667,0.5	0.167,0.286,0.233	0.327
ENSG00000151465	CDC123	10	+	12257738	12257834	12259359	12259466	12252288	12252321	12272946	12272995	87,88,84	51,46,72	272225233	148,105,93	65	65	0.0482356	0.361169	0.63,0.657,0.538	0.648,0.682,0.715	-0.073
ENSG00000143612	C1orf43	1	-	154184933	154185100	154186932	154187050	154179651	154180124	154192311	154192413	46,52,57	3,0,4	175,96,134	2,3,2	76	76	0.048255	0.361169	0.939,1.0,0.934	0.989,0.97,0.985	-0.024
ENSG00000047230	CTPS2	X	-	16685784	16685847	16688702	16688797	16685636	16685680	16696484	16696573	6,6,5	10,6,7	37,28,28	18,22,18	76	76	0.0486956	0.363269	0.375,0.5,0.417	0.673,0.56,0.609	-0.183
ENSG00000153310	FAM49B	8	-	130916744	130916831	130924715	130924761	130915557	130915596	130983188	130983241	0,0,1	7,19,10	0,0,0	51,49,36	71	71	0.0487159	0.363269	0.0,0.0,0.091	0.0,0.0,0.0	0.03
ENSG00000006607	FARP2	2	+	242344213	242344256	242346951	242347030	242343242	242343347	242350447	242350545	3,4,5	7,5,3	7,12,11	36,33,30	74	76	0.0488799	0.363742	0.306,0.451,0.631	0.166,0.272,0.274	0.225
ENSG00000105538	RASIP1	19	-	49230041	49230145	49230263	49230415	49227973	49228217	49230649	49230687	13,18,13	75,63,76	35,49,27	109130103	70	70	0.0489676	0.363742	0.148,0.222,0.146	0.243,0.274,0.208	-0.07
ENSG00000162600	OMA1	1	-	58996272	58996401	58999620	58999732	58992932	58993007	58999829	59000003	12,17,16	30,42,27	20,35,15	94,80,79	76	76	0.0489228	0.363742	0.286,0.288,0.372	0.175,0.304,0.16	0.102
ENSG00000105953	OGDH	7	+	44687042	44687133	44687255	44687358	44684925	44685117	44706334	44706450	3,3,7	18,28,29	9,13,5	96,97,101	76	76	0.0492979	0.365726	0.143,0.097,0.194	0.086,0.118,0.047	0.061
ENSG00000166012	TAF1D	11	-	93466252	93466287	93467790	93467826	93465409	93465457	93469306	93469470	14,17,15	140154125	74,51,40	319344323	60	58	0.04957	0.367274	0.088,0.096,0.104	0.183,0.125,0.107	-0.042
ENSG00000013364	MVP	16	+	29847024	29847119	29848042	29848279	29845255	29845387	29851498	29851780	39,50,46	19,16,13	98102102	55,59,55	76	76	0.0496386	0.367313	0.672,0.758,0.78	0.641,0.634,0.65	0.095
ENSG00000189091	SF3B3	16	+	70598967	70599173	70599270	70599427	70597778	70597953	70601313	70601439	188200199	121144145	586556497	344296278	76	76	0.049898	0.368044	0.608,0.581,0.578	0.63,0.653,0.641	-0.052
ENSG00000084652	TXLNA	1	+	32650125	32650217	32653554	32653725	32646842	32647178	32655655	32655850	3,6,4	4,9,6	38,46,38	111120116	76	76	0.049928	0.368044	0.429,0.4,0.4	0.255,0.277,0.247	0.15
ENSG00000130826	DKC1	X	+	153993718	153993805	153994181	153994273	153993201	153993241	153994490	153994675	17,34,13	60,93,67	133116115	261295308	72	72	0.049869	0.368044	0.221,0.268,0.162	0.338,0.282,0.272	-0.08

## Sheet: IntronRention
GeneID	geneSymbol	chr	strand	riExonStart_0base	riExonEnd	upstreamES	upstreamEE	downstreamES	downstreamEE	IJC_SAMPLE_1	SJC_SAMPLE_1	IJC_SAMPLE_2	SJC_SAMPLE_2	IncFormLen	SkipFormLen	PValue	FDR	IncLevel1	IncLevel2	IncLevelDifference
ENSG00000148926	ADM	11	+	10327226	10327645	10327226	10327345	10327495	10327645	144188209	7,4,13	14,10,10	20,17,8	76	38	0	0	0.911,0.959,0.889	0.259,0.227,0.385	0.629
ENSG00000145632	PLK2	5	-	57753910	57754355	57753910	57753998	57754225	57754355	138176206	175217203	15,11,10	90,57,71	76	38	0	0	0.283,0.289,0.337	0.077,0.088,0.066	0.226
ENSG00000115317	HTRA2	2	+	74758465	74758829	74758465	74758498	74758723	74758829	65,80,85	3,1,6	15,15,17	21,40,32	65	27	0	0	0.9,0.971,0.855	0.229,0.135,0.181	0.727
ENSG00000166012	TAF1D	11	-	93469859	93470405	93469859	93469917	93470229	93470405	705840949	19,20,31	261205198	107,126,78	76	38	0	0	0.949,0.955,0.939	0.549,0.449,0.559	0.429
ENSG00000013573	DDX11	12	+	31241977	31243028	31241977	31242085	31242336	31243028	33,38,35	4,4,7	24,28,35	97,89,58	76	38	0	0	0.805,0.826,0.714	0.11,0.136,0.232	0.622
ENSG00000204628	GNB2L1	5	-	180668491	180669345	180668491	180668639	180669173	180669345	90110661114	7909741074	118135108	14071041924	76	38	0	0	0.363,0.354,0.342	0.04,0.061,0.055	0.301
ENSG00000204628	GNB2L1	5	-	180663928	180664719	180663928	180664042	180664608	180664719	627682789	776853889	78,101,66	1020930814	76	38	0	0	0.288,0.286,0.307	0.037,0.052,0.039	0.251
ENSG00000242372	EIF6	20	-	33871978	33872295	33871978	33872064	33872183	33872295	132138160	102127127	65,49,37	303267238	76	38	0	0	0.393,0.352,0.386	0.097,0.084,0.072	0.293
ENSG00000166508	MCM7	7	-	99696645	99697026	99696645	99696826	99696901	99697026	191195242	209212204	83123107	403522488	76	38	0	0	0.314,0.315,0.372	0.093,0.105,0.099	0.235
ENSG00000166508	MCM7	7	-	99696645	99697376	99696645	99697026	99697211	99697376	344418519	81,99,113	121158151	242220204	76	38	0	0	0.68,0.679,0.697	0.2,0.264,0.27	0.441
ENSG00000134107	BHLHE40	3	+	5021646	5022093	5021646	5021716	5021985	5022093	223231330	0,2,2	6,9,7	9,14,8	76	38	0	0	1.0,0.983,0.988	0.25,0.243,0.304	0.725
ENSG00000087077	TRIP6	7	+	100467991	100468365	100467991	100468085	100468195	100468365	24,15,34	25,45,30	13,8,12	226190155	76	38	0	0	0.324,0.143,0.362	0.028,0.021,0.037	0.248
ENSG00000184436	THAP7	22	-	21354935	21355700	21354935	21355076	21355544	21355700	71,106,75	2,4,5	18,13,14	73,53,64	76	38	0	0	0.947,0.93,0.882	0.11,0.109,0.099	0.814
ENSG00000197989	SNHG12	1	-	28906044	28907158	28906044	28906493	28907071	28907158	109129153	2,8,7	113117104	163144118	76	38	0	0	0.965,0.89,0.916	0.257,0.289,0.306	0.64
ENSG00000198000	NOL8	9	-	95060538	95061236	95060538	95060618	95061165	95061236	16,19,20	6,9,6	12,17,16	77,79,67	76	38	0	0	0.571,0.514,0.625	0.072,0.097,0.107	0.478
ENSG00000215021	PHB2	12	-	7076838	7077184	7076838	7076942	7077054	7077184	190233263	42,61,54	64,75,66	81,79,77	76	38	0	0	0.693,0.656,0.709	0.283,0.322,0.3	0.384
ENSG00000215021	PHB2	12	-	7079358	7079808	7079358	7079443	7079579	7079808	99165148	54,88,82	3,15,5	94,149,90	76	38	0	0	0.478,0.484,0.474	0.016,0.048,0.027	0.448
ENSG00000164054	SHISA5	3	-	48509274	48510972	48509274	48510585	48510759	48510972	25,28,24	21,18,16	10,19,15	83124106	76	38	0	0	0.373,0.438,0.429	0.057,0.071,0.066	0.349
ENSG00000123737	EXOSC9	4	+	122735020	122737602	122735020	122735202	122737523	122737602	38,39,46	4,2,3	29,37,25	42,39,33	76	38	0	0	0.826,0.907,0.885	0.257,0.322,0.275	0.588
ENSG00000143621	ILF2	1	-	153635494	153635752	153635494	153635609	153635690	153635752	73,97,113	22,20,30	13,19,17	31,52,59	76	38	0	0	0.624,0.708,0.653	0.173,0.154,0.126	0.511
ENSG00000082898	XPO1	2	-	61711071	61713097	61711071	61711240	61712902	61713097	99,88,83	25,17,27	17,17,23	223252234	76	38	0	0	0.664,0.721,0.606	0.037,0.033,0.047	0.625
ENSG00000165671	NSD1	5	+	176562087	176563031	176562087	176562201	176562941	176563031	179189225	4,2,6	48,43,46	37,39,31	76	38	0	0	0.957,0.979,0.949	0.393,0.355,0.426	0.57
ENSG00000162298	SYVN1	11	-	64899718	64900251	64899718	64899822	64900202	64900251	58,70,82	1,1,0	15,31,17	21,42,29	76	38	0	0	0.967,0.972,1.0	0.263,0.27,0.227	0.726
ENSG00000162298	SYVN1	11	-	64897473	64897851	64897473	64897647	64897722	64897851	44,54,62	1,0,1	7,9,6	12,11,6	76	38	0	0	0.957,1.0,0.969	0.226,0.29,0.333	0.692
ENSG00000102225	CDK16	X	+	47087965	47088389	47087965	47088043	47088129	47088389	27,47,50	26,18,30	3,8,5	89,98,56	76	38	0	0	0.342,0.566,0.455	0.017,0.039,0.043	0.421
ENSG00000118515	SGK1	6	-	134491963	134492316	134491963	134492053	134492160	134492316	336363595	207244293	51,40,25	281238270	76	38	0	0	0.448,0.427,0.504	0.083,0.078,0.044	0.391
ENSG00000118515	SGK1	6	-	134494411	134494704	134494411	134494495	134494599	134494704	144516962338	184267369	182154125	239259162	76	38	0	0	0.797,0.761,0.76	0.276,0.229,0.278	0.512
ENSG00000118515	SGK1	6	-	134495648	134495999	134495648	134495724	134495869	134495999	139816621885	22,34,40	151154119	213129144	76	38	0	0	0.969,0.961,0.959	0.262,0.374,0.292	0.654
ENSG00000123416	TUBA1B	12	-	49523282	49525178	49523282	49523505	49525080	49525178	53,58,87	132150176	10,16,10	346325285	76	38	0	0	0.167,0.162,0.198	0.014,0.024,0.017	0.157
ENSG00000054967	RELT	11	+	73105280	73105779	73105280	73105362	73105521	73105779	32,33,39	1,2,1	6,9,8	10,16,18	76	38	0	0	0.941,0.892,0.951	0.231,0.22,0.182	0.717
ENSG00000168894	RNF181	2	+	85824226	85824704	85824226	85824301	85824567	85824704	66,55,56	106126101	3,8,3	173187195	76	38	0	0	0.237,0.179,0.217	0.009,0.021,0.008	0.198
ENSG00000104522	TSTA3	8	-	144695693	144695987	144695693	144695773	144695920	144695987	105,93,140	38,43,35	39,32,28	88,67,88	76	38	0	0	0.58,0.52,0.667	0.181,0.193,0.137	0.419
ENSG00000104522	TSTA3	8	-	144694787	144695465	144694787	144695135	144695365	144695465	90107145	28,30,32	16,20,19	47,52,61	76	38	0	0	0.616,0.641,0.694	0.145,0.161,0.135	0.503
ENSG00000140319	SRP14	15	-	40330482	40331149	40330482	40330595	40331076	40331149	77,77,111	165188169	1,3,3	246236221	76	38	0	0	0.189,0.17,0.247	0.002,0.006,0.007	0.197
ENSG00000136271	DDX56	7	-	44613181	44613524	44613181	44613343	44613434	44613524	44,74,106	3,4,3	1,4,7	14,24,16	76	38	0	0	0.88,0.902,0.946	0.034,0.077,0.179	0.813
ENSG00000067064	IDI1	10	-	1089240	1090111	1089240	1089333	1089938	1090111	67,74,86	19,20,27	14,21,20	168184168	76	38	0	0	0.638,0.649,0.614	0.04,0.054,0.056	0.584
ENSG00000213782	DDX47	12	+	12976136	12977611	12976136	12976950	12977473	12977611	163199208	8,7,10	5,9,8	88,100,94	76	38	0	0	0.911,0.934,0.912	0.028,0.043,0.041	0.882
ENSG00000213782	DDX47	12	+	12976136	12976950	12976136	12976253	12976803	12976950	330306320	4,3,8	16,26,27	21,16,23	76	38	0	0	0.976,0.981,0.952	0.276,0.448,0.37	0.605
ENSG00000213619	NDUFS3	11	+	47602076	47602536	47602076	47602174	47602386	47602536	115,98,176	44,50,64	15,30,14	105,76,67	76	38	0	0	0.567,0.495,0.579	0.067,0.165,0.095	0.438
ENSG00000166986	MARS	12	+	57910027	57910438	57910027	57910120	57910217	57910438	71,76,81	71,84,63	40,47,33	258217188	76	38	0	0	0.333,0.311,0.391	0.072,0.098,0.081	0.261
ENSG00000111011	RSRC2	12	-	123003385	123005975	123003385	123003576	123005931	123005975	87,84,86	2,0,2	22,23,12	23,11,8	76	38	0	0	0.956,1.0,0.956	0.324,0.511,0.429	0.549
ENSG00000160789	LMNA	1	+	156106711	156107023	156106711	156106819	156106903	156107023	62,70,118	199231229	17,17,7	576698639	76	38	0	0	0.135,0.132,0.205	0.015,0.012,0.005	0.147
ENSG00000105443	CYTH2	19	+	48978094	48981402	48978094	48978206	48981325	48981402	37,35,36	4,2,1	6,5,7	16,18,16	76	38	0	0	0.822,0.897,0.947	0.158,0.122,0.179	0.736
ENSG00000169727	GPS1	17	+	80011743	80012686	80011743	80011925	80012385	80012686	152202226	15,8,12	14,20,8	36,37,30	76	38	0	0	0.835,0.927,0.904	0.163,0.213,0.118	0.724
ENSG00000169727	GPS1	17	+	80011743	80012686	80011743	80011925	80012373	80012686	137173201	19,20,16	6,12,6	33,43,50	76	38	0	0	0.783,0.812,0.863	0.083,0.122,0.057	0.732
ENSG00000076604	TRAF4	17	+	27074860	27075196	27074860	27074965	27075034	27075196	123142202	1,1,2	22,41,29	50,90,98	76	38	0	0	0.984,0.986,0.981	0.18,0.186,0.129	0.819
ENSG00000114416	FXR1	3	+	180680670	180680878	180680670	180680728	180680815	180680878	68,78,85	46,60,59	71,82,60	252254225	76	38	0	0	0.425,0.394,0.419	0.123,0.139,0.118	0.286
ENSG00000146670	CDCA5	11	-	64850835	64851022	64850835	64850871	64850956	64851022	85,91,124	5,4,8	9,17,7	93,106,95	68	30	0	0	0.882,0.909,0.872	0.041,0.066,0.031	0.842
ENSG00000068308	OTUD5	X	-	48791736	48792140	48791736	48791885	48791983	48792140	26,25,46	28,37,34	13,14,7	191157159	76	38	0	0	0.317,0.253,0.404	0.033,0.043,0.022	0.292
ENSG00000154734	ADAMTS1	21	-	28212193	28212881	28212193	28212380	28212594	28212881	324453487	265311331	19,37,28	89,125,78	76	38	0	0	0.379,0.421,0.424	0.096,0.129,0.152	0.282
ENSG00000154734	ADAMTS1	21	-	28210757	28212081	28210757	28210933	28211905	28212081	449535701	259262320	14,16,14	91,88,105	76	38	0	0	0.464,0.505,0.523	0.071,0.083,0.063	0.425
ENSG00000102119	EMD	X	+	153608301	153608727	153608301	153608379	153608593	153608727	77,85,97	72,93,71	15,36,36	117169172	76	38	0	0	0.348,0.314,0.406	0.06,0.096,0.095	0.272
ENSG00000129347	KRI1	19	-	10670034	10670384	10670034	10670205	10670288	10670384	20,18,24	4,3,9	9,17,10	62,51,56	76	38	0	0	0.714,0.75,0.571	0.068,0.143,0.082	0.581
ENSG00000117335	CD46	1	+	207932983	207934791	207932983	207933069	207934593	207934791	116125114	50,52,53	40,72,56	135104184	76	38	0	0	0.537,0.546,0.518	0.129,0.257,0.132	0.361
ENSG00000113013	HSPA9	5	-	137892462	137893185	137892462	137892555	137893090	137893185	194189209	106117165	26,41,47	250325249	76	38	0	0	0.478,0.447,0.388	0.049,0.059,0.086	0.373
ENSG00000160201	U2AF1	21	-	44520562	44524512	44520562	44520629	44524424	44524512	70,87,75	10,13,12	23,31,20	63,73,85	76	38	0	0	0.778,0.77,0.758	0.154,0.175,0.105	0.624
ENSG00000160201	U2AF1	21	-	44513065	44514673	44513065	44513359	44514580	44514673	46,48,45	10,3,15	9,14,11	87,70,59	76	38	0	0	0.697,0.889,0.6	0.049,0.091,0.085	0.654
ENSG00000048162	NOP16	5	-	175815235	175815599	175815235	175815344	175815433	175815599	79,92,107	5,3,3	18,16,15	126194159	76	38	0	0	0.888,0.939,0.947	0.067,0.04,0.045	0.874
ENSG00000148229	POLE3	9	-	116171889	116172420	116171889	116172008	116172334	116172420	81,86,93	10,12,7	3,11,2	75,55,36	76	38	0	0	0.802,0.782,0.869	0.02,0.091,0.027	0.772
ENSG00000115053	NCL	2	-	232322976	232323836	232322976	232323100	232323711	232323836	486501628	210247246	74,60,70	644591465	76	38	0	0	0.536,0.504,0.561	0.054,0.048,0.07	0.476
ENSG00000111321	LTBR	12	+	6494187	6494545	6494187	6494313	6494392	6494545	92,93,105	21,21,27	10,16,17	80109132	76	38	0	0	0.687,0.689,0.66	0.059,0.068,0.06	0.616
ENSG00000196531	NACA	12	-	57106223	57106692	57106223	57106336	57106569	57106692	135150158	558485580	31,32,15	1016827749	76	38	0	0	0.108,0.134,0.12	0.015,0.019,0.01	0.106
ENSG00000136718	IMP4	2	+	131103139	131103506	131103139	131103272	131103351	131103506	19,18,20	9,16,12	2,0,2	43,55,47	76	38	0	0	0.514,0.36,0.455	0.023,0.0,0.021	0.428
ENSG00000136718	IMP4	2	+	131103351	131103685	131103351	131103506	131103590	131103685	67,66,71	19,6,16	6,8,11	68,60,56	76	38	0	0	0.638,0.846,0.689	0.042,0.063,0.089	0.66
ENSG00000136718	IMP4	2	+	131103590	131103822	131103590	131103685	131103773	131103822	155174199	27,28,30	8,11,11	137143153	76	38	0	0	0.742,0.757,0.768	0.028,0.037,0.035	0.722
ENSG00000136718	IMP4	2	+	131102948	131103272	131102948	131103058	131103139	131103272	90114124	3,4,7	15,21,20	40,29,22	76	38	0	0	0.938,0.934,0.899	0.158,0.266,0.313	0.678
ENSG00000163930	BAP1	3	-	52440268	52440923	52440268	52440392	52440844	52440923	42,50,62	11,16,14	7,2,9	37,45,50	76	38	0	0	0.656,0.61,0.689	0.086,0.022,0.083	0.588
ENSG00000163930	BAP1	3	-	52436794	52437314	52436794	52436887	52437153	52437314	69,94,130	22,20,18	11,19,28	65,72,104	76	38	0	0	0.611,0.701,0.783	0.078,0.117,0.119	0.594
ENSG00000132640	BTBD3	20	+	11898425	11899249	11898425	11898659	11898981	11899249	309357371	0,3,0	75,77,53	26,14,21	76	38	0	0	1.0,0.983,1.0	0.591,0.733,0.558	0.367
ENSG00000142684	ZNF593	1	+	26496908	26498551	26496908	26496971	26497065	26498551	74,92,83	1,4,1	8,9,7	34,22,19	76	38	0	0	0.974,0.92,0.976	0.105,0.17,0.156	0.813
ENSG00000100664	EIF5	14	+	103805508	103806140	103805508	103805670	103805975	103806140	154199196	95,114,82	19,20,9	856722627	76	38	0	0	0.448,0.466,0.544	0.011,0.014,0.007	0.475
ENSG00000107937	GTPBP4	10	+	1042045	1043248	1042045	1042182	1043147	1043248	282306289	1,1,1	33,33,21	26,20,20	76	38	0	0	0.993,0.994,0.993	0.388,0.452,0.344	0.599
ENSG00000161638	ITGA5	12	-	54798213	54798678	54798213	54798259	54798486	54798678	15,21,19	11,18,10	2,10,3	58,73,56	76	38	0	0	0.405,0.368,0.487	0.017,0.064,0.026	0.384
ENSG00000204256	BRD2	6	+	32944338	32945347	32944338	32944713	32945218	32945347	217280390	2,2,5	44,38,27	117130110	76	38	0	0	0.982,0.986,0.975	0.158,0.128,0.109	0.849
ENSG00000204256	BRD2	6	+	32944338	32945347	32944338	32944713	32945036	32945347	459582577	0,4,3	50,74,57	5,15,7	76	38	0	0	1.0,0.986,0.99	0.833,0.712,0.803	0.209
ENSG00000160714	UBE2Q1	1	-	154524879	154525296	154524879	154524940	154525211	154525296	35,41,43	3,5,13	15,10,8	48,32,44	76	38	0	0	0.854,0.804,0.623	0.135,0.135,0.083	0.643
ENSG00000013441	CLK1	2	-	201721613	201722607	201721613	201721708	201722440	201722607	41,60,57	1,0,0	6,9,10	17,28,16	76	38	0	0	0.953,1.0,1.0	0.15,0.138,0.238	0.809
ENSG00000179632	MAF1	8	+	145161245	145161577	145161245	145161367	145161457	145161577	98119110	55,56,42	37,44,34	219178177	76	38	0	0	0.471,0.515,0.567	0.078,0.11,0.088	0.426
ENSG00000119707	RBM25	14	+	73566374	73570186	73566374	73566458	73569899	73570186	20,19,23	3,5,5	30,37,30	123,113,70	76	38	0	0	0.769,0.655,0.697	0.109,0.141,0.176	0.565
ENSG00000119707	RBM25	14	+	73577538	73578510	73577538	73577863	73578235	73578510	52,60,48	5,6,11	27,47,36	76,77,84	76	38	0	0	0.839,0.833,0.686	0.151,0.234,0.176	0.599
ENSG00000183258	DDX41	5	-	176942929	176943194	176942929	176942990	176943119	176943194	156185212	22,27,36	14,7,12	96,103,89	76	38	0	0	0.78,0.774,0.746	0.068,0.033,0.063	0.712
ENSG00000183258	DDX41	5	-	176940353	176940848	176940353	176940485	176940685	176940848	114144152	21,17,24	2,15,10	43,42,40	76	38	0	0	0.731,0.809,0.76	0.023,0.152,0.111	0.671
ENSG00000183258	DDX41	5	-	176939496	176939877	176939496	176939646	176939780	176939877	70,75,102	18,33,25	4,4,4	84,70,68	76	38	0	0	0.66,0.532,0.671	0.023,0.028,0.029	0.594
ENSG00000183258	DDX41	5	-	176943288	176943836	176943288	176943448	176943725	176943836	82103111	18,19,27	9,13,11	49,54,52	76	38	0	0	0.695,0.73,0.673	0.084,0.107,0.096	0.604
ENSG00000100906	NFKBIA	14	-	35871599	35872065	35871599	35871869	35871976	35872065	103710991489	86,96,102	19,26,31	120141137	76	38	0	0	0.858,0.851,0.88	0.073,0.084,0.102	0.777
ENSG00000166333	ILK	11	+	6629923	6630198	6629923	6630020	6630114	6630198	41,51,58	77,92,74	9,11,10	146144141	76	38	0	0	0.21,0.217,0.282	0.03,0.037,0.034	0.203
ENSG00000166333	ILK	11	+	6629923	6630387	6629923	6630198	6630301	6630387	83,96,115	94118116	30,21,10	231209208	76	38	0	0	0.306,0.289,0.331	0.061,0.048,0.023	0.265
ENSG00000143862	ARL8A	1	-	202104586	202104928	202104586	202104654	202104834	202104928	17,30,26	2,3,4	4,7,1	43,51,31	76	38	0	0	0.81,0.833,0.765	0.044,0.064,0.016	0.761
ENSG00000159479	MED8	1	-	43851648	43852341	43851648	43851897	43852259	43852341	141190211	14,6,8	11,10,10	61,64,52	76	38	0	0	0.834,0.941,0.93	0.083,0.072,0.088	0.821
ENSG00000108021	FAM208B	10	+	5804494	5805703	5804494	5804609	5804991	5805703	19,29,26	9,7,14	1,6,6	127141137	76	38	0	0	0.514,0.674,0.481	0.004,0.021,0.021	0.541
ENSG00000115875	SRSF7	2	-	38975720	38976847	38975720	38975795	38976670	38976847	89120104	15,26,27	125128105	152150113	76	38	0	0	0.748,0.698,0.658	0.291,0.299,0.317	0.399
ENSG00000126749	EMG1	12	+	7083713	7084310	7083713	7083855	7084251	7084310	52,69,73	8,11,15	35,57,30	57,55,45	76	38	0	0	0.765,0.758,0.709	0.235,0.341,0.25	0.469
ENSG00000120314	WDR55	5	+	140047818	140048087	140047818	140047919	140047999	140048087	36,48,47	5,5,4	33,25,20	56,36,37	76	38	0	0	0.783,0.828,0.855	0.228,0.258,0.213	0.589
ENSG00000131051	RBM39	20	-	34326889	34328809	34326889	34326939	34328745	34328809	797851870	13,13,22	300299221	72,98,54	76	38	0	0	0.968,0.97,0.952	0.676,0.604,0.672	0.313
ENSG00000131051	RBM39	20	-	34292589	34293252	34292589	34292668	34293146	34293252	104105124	0,7,8	10,2,6	65,122,88	76	38	0	0	1.0,0.882,0.886	0.071,0.008,0.033	0.885
ENSG00000130305	NSUN5	7	-	72721579	72722550	72721579	72721754	72722427	72722550	16,26,44	2,2,3	17,22,12	54,53,44	76	38	0	0	0.8,0.867,0.88	0.136,0.172,0.12	0.706
ENSG00000111641	NOP2	12	-	6669263	6669735	6669263	6669492	6669612	6669735	86,87,145	3,1,1	14,25,15	22,16,18	76	38	0	0	0.935,0.978,0.986	0.241,0.439,0.294	0.642
ENSG00000111641	NOP2	12	-	6669612	6669953	6669612	6669735	6669863	6669953	82,90,127	9,7,11	7,3,4	59,63,47	76	38	0	0	0.82,0.865,0.852	0.056,0.023,0.041	0.806
ENSG00000227057	WDR46	6	-	33246884	33247387	33246884	33247151	33247273	33247387	113127150	13,18,27	10,18,13	57,65,51	76	38	0	0	0.813,0.779,0.735	0.081,0.122,0.113	0.67
ENSG00000227057	WDR46	6	-	33248204	33248764	33248204	33248299	33248450	33248764	29,43,65	15,15,13	0,3,5	26,42,31	76	38	0	0	0.492,0.589,0.714	0.0,0.034,0.075	0.562
ENSG00000227057	WDR46	6	-	33255924	33256247	33255924	33256012	33256134	33256247	272302341	16,21,31	15,21,18	61,54,51	76	38	0	0	0.895,0.878,0.846	0.109,0.163,0.15	0.732
ENSG00000198912	C1orf174	1	-	3807132	3809560	3807132	3807621	3809446	3809560	38,44,37	1,0,0	9,15,9	31,42,35	76	38	0	0	0.95,1.0,1.0	0.127,0.152,0.114	0.852
ENSG00000204356	RDBP	6	-	31924469	31924787	31924469	31924615	31924717	31924787	113128127	40,46,29	4,10,14	88110133	76	38	0	0	0.585,0.582,0.686	0.022,0.043,0.05	0.579
ENSG00000160679	CHTOP	1	+	153609047	153610924	153609047	153609129	153610770	153610924	186216222	0,6,3	60,69,57	42,40,38	76	38	0	0	1.0,0.947,0.974	0.417,0.463,0.429	0.537
ENSG00000144567	FAM134A	2	+	220045783	220046185	220045783	220045927	220046090	220046185	23,37,46	14,19,21	12,13,6	84,74,89	76	38	0	0	0.451,0.493,0.523	0.067,0.081,0.033	0.429
ENSG00000092199	HNRNPC	14	-	21677294	21679725	21677294	21679465	21679564	21679725	62,89,107	93107139	21,18,21	118116128	76	38	0	0	0.25,0.294,0.278	0.082,0.072,0.076	0.197
ENSG00000144136	SLC20A1	2	+	113417963	113418803	113417963	113418149	113418718	113418803	66,73,85	5,8,8	8,8,4	59,80,76	76	38	0	0	0.868,0.82,0.842	0.063,0.048,0.026	0.798
ENSG00000133316	WDR74	11	-	62601089	62601409	62601089	62601146	62601263	62601409	237293376	3,3,0	12,24,9	21,42,48	76	38	0	0	0.975,0.98,1.0	0.222,0.222,0.086	0.808
ENSG00000130713	EXOSC2	9	+	133572968	133573638	133572968	133573014	133573548	133573638	317305365	22,26,32	113,98,102	428405415	76	38	0	0	0.878,0.854,0.851	0.117,0.108,0.109	0.75
ENSG00000052749	RRP12	10	-	99118293	99118767	99118293	99118376	99118699	99118767	13,11,18	19,12,13	6,2,1	90,76,72	76	38	0	0	0.255,0.314,0.409	0.032,0.013,0.007	0.309
ENSG00000052749	RRP12	10	-	99130679	99131923	99130679	99130838	99131829	99131923	23,23,25	15,11,14	5,12,7	103,101,98	76	38	0	0	0.434,0.511,0.472	0.024,0.056,0.034	0.434
ENSG00000168003	SLC3A2	11	+	62652648	62653080	62652648	62652829	62652936	62653080	302369468	125153169	31,41,25	362381291	76	38	0	0	0.547,0.547,0.581	0.041,0.051,0.041	0.514
ENSG00000168291	PDHB	3	-	58417457	58417711	58417457	58417520	58417603	58417711	45,82,78	231235183	22,21,25	537549557	76	38	0	0	0.089,0.149,0.176	0.02,0.019,0.022	0.118
ENSG00000172732	MUS81	11	+	65632190	65632616	65632190	65632286	65632487	65632616	76,81,81	1,3,3	43,50,56	38,34,39	76	38	0	0	0.974,0.931,0.931	0.361,0.424,0.418	0.544
ENSG00000168906	MAT2A	2	+	85769277	85769870	85769277	85769496	85769687	85769870	185215266	22,34,19	105130109	336394392	76	38	0	0	0.808,0.76,0.875	0.135,0.142,0.122	0.681
ENSG00000070047	PHRF1	11	+	581491	582081	581491	581606	581961	582081	38,56,71	1,1,0	2,10,9	10,11,12	76	38	0	0	0.95,0.966,1.0	0.091,0.313,0.273	0.746
ENSG00000100823	APEX1	14	+	20923736	20924260	20923736	20923862	20924072	20924260	87,100,81	10,30,13	15,9,15	68,80,53	76	38	0	0	0.813,0.625,0.757	0.099,0.053,0.124	0.64
ENSG00000103549	RNF40	16	+	30780506	30780921	30780506	30780719	30780795	30780921	113113166	4,4,3	8,11,9	37,34,32	76	38	0	0	0.934,0.934,0.965	0.098,0.139,0.123	0.824
ENSG00000111665	CDCA3	12	-	6958486	6959022	6958486	6958593	6958728	6959022	14,16,13	7,6,5	20,13,22	103100114	76	38	0	0	0.5,0.571,0.565	0.088,0.061,0.088	0.466
ENSG00000166598	HSP90B1	12	+	104336304	104337097	104336304	104336574	104336851	104337097	150180161	162205188	12,18,11	262276205	76	38	0	0	0.316,0.305,0.3	0.022,0.032,0.026	0.28
ENSG00000132341	RAN	12	+	131357128	131357465	131357128	131357174	131357380	131357465	544686778	1,1,2	47,55,33	5,6,8	76	38	0	0	0.996,0.997,0.995	0.825,0.821,0.673	0.223
ENSG00000134222	PSRC1	1	-	109825139	109825353	109825139	109825197	109825301	109825353	38,39,30	0,2,3	18,6,8	45,57,43	76	38	0	0	1.0,0.907,0.833	0.167,0.05,0.085	0.813
ENSG00000124784	RIOK1	6	+	7402835	7403130	7402835	7402948	7403049	7403130	17,12,23	1,1,2	10,7,9	24,42,38	76	38	0	0	0.895,0.857,0.852	0.172,0.077,0.106	0.75
ENSG00000197622	CDC42SE1	1	-	151027491	151028469	151027491	151027602	151028152	151028469	44,56,67	7,6,6	77,87,73	185190195	76	38	0	0	0.759,0.824,0.848	0.172,0.186,0.158	0.638
ENSG00000163435	ELF3	1	+	201981084	201981564	201981084	201981306	201981471	201981564	48,85,98	0,0,1	15,13,16	16,8,12	76	38	0	0	1.0,1.0,0.98	0.319,0.448,0.4	0.604
ENSG00000146830	GIGYF1	7	-	100283596	100284056	100283596	100283702	100283802	100284056	25,32,35	3,3,1	16,17,10	60,58,43	76	38	0	0	0.806,0.842,0.946	0.118,0.128,0.104	0.748
ENSG00000153914	SREK1	5	+	65458241	65459750	65458241	65458420	65459619	65459750	35,24,24	14,7,4	9,12,12	85,61,88	76	38	0	0	0.556,0.632,0.75	0.05,0.09,0.064	0.578
ENSG00000156482	RPL30	8	-	99057170	99057627	99057170	99057316	99057574	99057627	610699694	102,92,128	38,29,32	172133124	76	38	0	0	0.749,0.792,0.731	0.099,0.098,0.114	0.654
ENSG00000187514	PTMA	2	+	232576057	232576693	232576057	232576129	232576596	232576693	83010201222	157195177	53,66,72	322287258	76	38	0	0	0.726,0.723,0.775	0.076,0.103,0.122	0.641
ENSG00000156983	BRPF1	3	+	9787256	9787614	9787256	9787393	9787495	9787614	45,37,70	0,0,1	10,12,15	18,13,11	76	38	0	0	1.0,1.0,0.972	0.217,0.316,0.405	0.678
ENSG00000241945	PWP2	21	+	45540832	45542238	45540832	45540983	45542057	45542238	27,36,37	3,4,2	4,5,2	31,38,19	76	38	0	0	0.818,0.818,0.902	0.061,0.062,0.05	0.788
ENSG00000241945	PWP2	21	+	45544460	45546000	45544460	45544608	45545891	45546000	7,11,16	12,17,19	3,3,2	101100107	76	38	0	0	0.226,0.244,0.296	0.015,0.015,0.009	0.242
ENSG00000115307	AUP1	2	-	74754067	74754490	74754067	74754186	74754374	74754490	233250258	117137112	57,70,78	223293263	76	38	0	0	0.499,0.477,0.535	0.113,0.107,0.129	0.387
ENSG00000115307	AUP1	2	-	74754067	74754490	74754067	74754248	74754374	74754490	185184223	2,2,6	11,22,18	12,8,10	76	38	0	0	0.979,0.979,0.949	0.314,0.579,0.474	0.513
ENSG00000115307	AUP1	2	-	74756258	74756626	74756258	74756409	74756488	74756626	50,54,89	25,27,34	5,6,5	33,50,31	76	38	0	0	0.5,0.5,0.567	0.07,0.057,0.075	0.455
ENSG00000115307	AUP1	2	-	74755877	74756409	74755877	74756062	74756258	74756409	261308348	82,111,75	70,98,82	115129167	76	38	0	0	0.614,0.581,0.699	0.233,0.275,0.197	0.396
ENSG00000114867	EIF4G1	3	+	184049053	184049394	184049053	184049152	184049259	184049394	136148214	166190204	22,25,16	350334284	76	38	0	0	0.291,0.28,0.344	0.03,0.036,0.027	0.274
ENSG00000128272	ATF4	22	+	39916568	39917676	39916568	39916756	39917358	39917676	259317292	2,2,0	37,52,35	54,52,49	76	38	0	0	0.985,0.988,1.0	0.255,0.333,0.263	0.707
ENSG00000131871	SELS	15	-	101814796	101815566	101814796	101814886	101815459	101815566	25,28,28	35,54,27	30,27,23	306277293	76	38	0	0	0.263,0.206,0.341	0.047,0.046,0.038	0.226
ENSG00000143761	ARF1	1	+	228284778	228285153	228284778	228284963	228285042	228285153	52,71,63	48,51,51	7,6,6	192,106,92	76	38	0	0	0.351,0.41,0.382	0.018,0.028,0.032	0.355
ENSG00000008988	RPS20	8	-	56986618	56987065	56986618	56986718	56986939	56987065	66,72,74	94313211038	16,17,1	134613111201	76	38	0	0	0.034,0.027,0.034	0.006,0.006,0.0	0.028
ENSG00000184840	TMED9	5	+	177020650	177021286	177020650	177020776	177021139	177021286	50,46,76	71,69,65	2,4,1	92,87,92	76	38	0	0	0.26,0.25,0.369	0.011,0.022,0.005	0.28
ENSG00000105677	TMEM147	19	+	36037573	36037931	36037573	36037710	36037846	36037931	83,62,67	132160162	16,23,8	186177159	76	38	0	0	0.239,0.162,0.171	0.041,0.061,0.025	0.148
ENSG00000109113	RAB34	17	-	27042049	27042232	27042049	27042140	27042212	27042232	47,41,63	48,53,61	15,23,12	109140103	52	14	0	0	0.209,0.172,0.218	0.036,0.042,0.03	0.164
ENSG00000038274	MAT2B	5	+	162939007	162940675	162939007	162939202	162940560	162940675	42,35,30	23,28,30	13,4,11	161186185	76	38	0	0	0.477,0.385,0.333	0.039,0.011,0.029	0.372
ENSG00000174243	DDX23	12	-	49231063	49231440	49231063	49231176	49231306	49231440	43,57,44	15,5,14	8,13,12	108,115,94	76	38	0	0	0.589,0.851,0.611	0.036,0.053,0.06	0.634
ENSG00000174243	DDX23	12	-	49230351	49230820	49230351	49230577	49230676	49230820	59,87,87	3,7,8	8,8,12	67,70,61	76	38	0	0	0.908,0.861,0.845	0.056,0.054,0.09	0.805
ENSG00000221914	PPP2R2A	8	+	26220199	26221406	26220199	26220364	26221236	26221406	30,44,27	7,14,9	13,12,10	127125107	76	38	0	0	0.682,0.611,0.6	0.049,0.046,0.045	0.584
ENSG00000003756	RBM5	3	+	50154506	50154812	50154506	50154604	50154682	50154812	85,80,82	6,13,3	18,17,23	69,97,96	76	38	0	0	0.876,0.755,0.932	0.115,0.081,0.107	0.753
ENSG00000095787	WAC	10	+	28903495	28905291	28903495	28903614	28905101	28905291	42,62,41	1,2,3	0,2,4	54,54,41	76	38	0	0	0.955,0.939,0.872	0.0,0.018,0.047	0.9
ENSG00000137504	CREBZF	11	-	85374567	85376146	85374567	85374645	85374858	85376146	435474584	0,0,1	128175131	9,12,11	76	38	0	0	1.0,1.0,0.997	0.877,0.879,0.856	0.128
ENSG00000127054	CPSF3L	1	-	1255835	1256473	1255835	1255909	1256375	1256473	43,53,57	31,44,40	9,20,17	67,90,90	76	38	0	0	0.41,0.376,0.416	0.063,0.1,0.086	0.318
ENSG00000089737	DDX24	14	-	94521341	94524243	94521341	94521530	94524167	94524243	57,58,84	9,12,9	13,9,12	56,56,62	76	38	0	0	0.76,0.707,0.824	0.104,0.074,0.088	0.675
ENSG00000106263	EIF3B	7	+	2405951	2406226	2405951	2406083	2406159	2406226	70,95,82	42,53,86	25,43,22	109153126	76	38	0	0	0.455,0.473,0.323	0.103,0.123,0.08	0.315
ENSG00000106263	EIF3B	7	+	2418323	2418877	2418323	2418401	2418768	2418877	45,56,69	204234193	4,0,0	602572569	76	38	0	0	0.099,0.107,0.152	0.003,0.0,0.0	0.118
ENSG00000152332	UHMK1	1	+	162469744	162470894	162469744	162470037	162470702	162470894	27,26,21	54,71,75	5,10,8	315265262	76	38	0	0	0.2,0.155,0.123	0.008,0.019,0.015	0.145
ENSG00000163938	GNL3	3	+	52724607	52725087	52724607	52724720	52724960	52725087	419511569	5,9,4	79,72,53	208200220	76	38	0	0	0.977,0.966,0.986	0.16,0.153,0.108	0.836
ENSG00000071859	FAM50A	X	+	153678028	153678279	153678028	153678083	153678230	153678279	57,61,99	43,65,54	7,35,28	139117115	76	38	0	0	0.399,0.319,0.478	0.025,0.13,0.109	0.311
ENSG00000143321	HDGF	1	-	156714799	156715165	156714799	156714938	156715088	156715165	257318371	120107196	30,39,23	295185137	76	38	0	0	0.517,0.598,0.486	0.048,0.095,0.077	0.46
ENSG00000122952	ZWINT	10	-	58117198	58118220	58117198	58117946	58118137	58118220	208260342	49,83,81	57,64,77	254272351	76	38	0	0	0.68,0.61,0.679	0.101,0.105,0.099	0.555
ENSG00000122952	ZWINT	10	-	58119447	58120144	58119447	58119614	58119778	58120144	186235278	41,47,53	175190133	173184158	76	38	0	0	0.694,0.714,0.724	0.336,0.341,0.296	0.386
ENSG00000255717	SNHG1	11	-	62621272	62621536	62621272	62621305	62621489	62621536	113712821794	0,1,1	160226194	20,28,12	65	27	0	0	1.0,0.998,0.999	0.769,0.77,0.87	0.196
ENSG00000255717	SNHG1	11	-	62622359	62622688	62622359	62622410	62622604	62622688	90610361157	13,14,13	181167146	146154136	76	38	0	0	0.972,0.974,0.978	0.383,0.352,0.349	0.613
ENSG00000142186	SCYL1	11	+	65305740	65306175	65305740	65305795	65305912	65306175	38,31,46	7,10,17	20,13,16	87,107,84	76	38	0	0	0.731,0.608,0.575	0.103,0.057,0.087	0.556
ENSG00000063177	RPL18	19	-	49118587	49119203	49118587	49118704	49119133	49119203	628737848	974944884	32,47,31	114312141107	76	38	0	0	0.244,0.281,0.324	0.014,0.019,0.014	0.267
ENSG00000169045	HNRNPH1	5	-	179047892	179048398	179047892	179048036	179048242	179048398	284339519	143194171	141149139	494360330	76	38	0	0	0.498,0.466,0.603	0.125,0.171,0.174	0.366
ENSG00000169045	HNRNPH1	5	-	179043126	179044111	179043126	179043219	179044021	179044111	244292317	29,35,36	94,95,106	54,41,53	76	38	0	0	0.808,0.807,0.815	0.465,0.537,0.5	0.309
ENSG00000169045	HNRNPH1	5	-	179043126	179044111	179043126	179043219	179043869	179044111	243302339	266336308	98,99,102	745620705	76	38	0	0	0.314,0.31,0.355	0.062,0.074,0.067	0.259
ENSG00000169045	HNRNPH1	5	-	179043869	179044111	179043869	179043959	179044051	179044111	204233263	132159143	153161140	234346318	76	38	0	0	0.436,0.423,0.479	0.246,0.189,0.18	0.241
ENSG00000198901	PRC1	15	-	91524728	91525211	91524728	91524899	91524977	91525211	61,58,56	58,76,56	50,54,39	425393377	76	38	0	0	0.345,0.276,0.333	0.056,0.064,0.049	0.262
ENSG00000100650	SRSF5	14	+	70235514	70235968	70235514	70235613	70235898	70235968	219271321	0,2,1	140186155	30,30,32	76	38	0	0	1.0,0.985,0.994	0.7,0.756,0.708	0.272
ENSG00000102317	RBM3	X	+	48433948	48434471	48433948	48434055	48434202	48434471	209207283	0,0,0	67,90,47	15,18,22	76	38	0	0	1.0,1.0,1.0	0.691,0.714,0.516	0.36
ENSG00000088038	CNOT3	19	+	54647395	54647870	54647395	54647485	54647741	54647870	37,38,33	5,1,5	5,3,2	19,28,27	76	38	0	0	0.787,0.95,0.767	0.116,0.051,0.036	0.767
ENSG00000182944	EWSR1	22	+	29694722	29695270	29694722	29694885	29695184	29695270	175176192	4,8,4	24,32,15	17,16,13	76	38	0	0	0.956,0.917,0.96	0.414,0.5,0.366	0.518
ENSG00000169242	EFNA1	1	+	155105978	155106256	155105978	155106044	155106205	155106256	511577631	3,1,3	21,22,22	55,74,69	76	38	0	0	0.988,0.997,0.991	0.16,0.129,0.137	0.85
ENSG00000182199	SHMT2	12	+	57627785	57628509	57627785	57627893	57628016	57628509	96123149	46,43,48	14,15,9	59,62,40	76	38	0	0	0.511,0.589,0.608	0.106,0.108,0.101	0.464
ENSG00000182199	SHMT2	12	+	57625993	57626358	57625993	57626075	57626235	57626358	59,58,110	324365301	8,4,2	369397504	76	38	0	0	0.083,0.074,0.154	0.011,0.005,0.002	0.098
ENSG00000162413	KLHL21	1	-	6650783	6655617	6650783	6653718	6655544	6655617	46,54,67	0,0,1	29,37,22	42,20,32	76	38	0	0	1.0,1.0,0.971	0.257,0.481,0.256	0.659
ENSG00000164405	UQCRQ	5	+	132202560	132203379	132202560	132202727	132203179	132203379	253280254	28,24,26	19,34,25	22,39,38	76	38	0	0	0.819,0.854,0.83	0.302,0.304,0.248	0.55
ENSG00000075415	SLC25A3	12	+	98987752	98989626	98987752	98987913	98989504	98989626	156174202	159196239	33,42,23	268352204	76	38	0	0	0.329,0.307,0.297	0.058,0.056,0.053	0.255
ENSG00000103502	CDIPT	16	-	29871901	29872580	29871901	29871983	29872426	29872580	26,38,54	5,3,7	3,4,5	26,21,14	76	38	0	0	0.722,0.864,0.794	0.055,0.087,0.152	0.695
ENSG00000172932	ANKRD13D	11	+	67057548	67057917	67057548	67057684	67057792	67057917	26,26,17	0,2,1	4,7,7	17,26,22	76	38	0	0	1.0,0.867,0.895	0.105,0.119,0.137	0.8
ENSG00000166165	CKB	14	-	103988359	103988842	103988359	103988514	103988637	103988842	34,53,60	117147153	3,9,7	208223128	76	38	0	0	0.127,0.153,0.164	0.007,0.02,0.027	0.13
ENSG00000171848	RRM2	2	+	10262865	10263184	10262865	10263024	10263109	10263184	20,42,36	13,14,14	0,4,2	63,67,48	76	38	0	0	0.435,0.6,0.563	0.0,0.029,0.02	0.516
ENSG00000242485	MRPL20	1	-	1341188	1342399	1341188	1341266	1342288	1342399	124141163	141141113	16,16,11	241261219	76	38	0	0	0.305,0.333,0.419	0.032,0.03,0.024	0.324
ENSG00000137497	NUMA1	11	-	71718234	71719891	71718234	71718481	71719733	71719891	56,53,59	9,7,16	19,14,11	58,67,79	76	38	0	0	0.757,0.791,0.648	0.141,0.095,0.065	0.632
ENSG00000204469	PRRC2A	6	+	31603358	31603826	31603358	31603526	31603743	31603826	41,49,44	3,5,5	6,4,10	22,22,19	76	38	0	0	0.872,0.831,0.815	0.12,0.083,0.208	0.702
ENSG00000110321	EIF4G2	11	-	10825833	10826562	10825833	10825965	10826459	10826562	413560619	171195203	74,79,72	338366381	76	38	0	0	0.547,0.589,0.604	0.099,0.097,0.086	0.486
ENSG00000110321	EIF4G2	11	-	10821098	10821895	10821098	10821303	10821636	10821895	297328396	306420365	95,98,69	807773714	76	38	0	0	0.327,0.281,0.352	0.056,0.06,0.046	0.266
ENSG00000110321	EIF4G2	11	-	10823207	10823756	10823207	10823321	10823595	10823756	85124168	179171216	19,24,17	390355309	76	38	0	0	0.192,0.266,0.28	0.024,0.033,0.027	0.218
ENSG00000110321	EIF4G2	11	-	10825026	10825597	10825026	10825137	10825445	10825597	505574597	428537494	78,95,69	968975924	76	38	0	0	0.371,0.348,0.377	0.039,0.046,0.036	0.325
ENSG00000165280	VCP	9	-	35061999	35062347	35061999	35062135	35062213	35062347	91,99,110	137175168	41,63,46	392378348	76	38	0	0	0.249,0.22,0.247	0.05,0.077,0.062	0.176
ENSG00000165280	VCP	9	-	35060309	35060920	35060309	35060522	35060797	35060920	39,45,44	128116165	15,13,13	286261246	76	38	0	0	0.132,0.162,0.118	0.026,0.024,0.026	0.112
ENSG00000172500	FIBP	11	-	65652040	65652469	65652040	65652127	65652405	65652469	119,96,113	178211185	11,25,14	199253251	76	38	0	0	0.251,0.185,0.234	0.027,0.047,0.027	0.19
ENSG00000251022	RP11-163O17.1	4	-	83821229	83821719	83821229	83821376	83821486	83821719	151174181	9,10,7	8,13,12	95,94,79	76	38	0	0	0.893,0.897,0.928	0.04,0.065,0.071	0.847
ENSG00000174744	BRMS1	11	-	66108244	66108804	66108244	66108517	66108676	66108804	37,42,50	6,10,9	7,14,10	73,110,76	76	38	0	0	0.755,0.677,0.735	0.046,0.06,0.062	0.666
ENSG00000174744	BRMS1	11	-	66105713	66106256	66105713	66105753	66106191	66106256	18,35,20	6,10,11	13,9,14	98,111,73	72	34	0	0	0.586,0.623,0.462	0.059,0.037,0.083	0.497
ENSG00000174744	BRMS1	11	-	66108244	66108517	66108244	66108341	66108437	66108517	17,26,31	5,10,6	2,6,4	116111124	76	38	0	0	0.63,0.565,0.721	0.009,0.026,0.016	0.622
ENSG00000161204	ABCF3	3	+	183905184	183905549	183905184	183905231	183905451	183905549	89,110,96	3,2,3	47,49,52	138111117	76	38	0	0	0.937,0.965,0.941	0.146,0.181,0.182	0.778
ENSG00000161204	ABCF3	3	+	183904294	183904663	183904294	183904442	183904583	183904663	31,32,37	2,7,6	7,3,9	84,77,49	76	38	0	0	0.886,0.696,0.755	0.04,0.019,0.084	0.731
ENSG00000161204	ABCF3	3	+	183905451	183905771	183905451	183905549	183905648	183905771	50,40,55	4,2,2	13,21,12	128102106	76	38	0	0	0.862,0.909,0.932	0.048,0.093,0.054	0.836
ENSG00000161204	ABCF3	3	+	183910388	183910684	183910388	183910477	183910592	183910684	7,18,25	0,1,0	10,11,7	42,40,35	76	38	0	0	1.0,0.9,1.0	0.106,0.121,0.091	0.861
ENSG00000149136	SSRP1	11	-	57097764	57098401	57097764	57097903	57098328	57098401	89,72,119	207239240	3,4,3	360321254	76	38	0	0	0.177,0.131,0.199	0.004,0.006,0.006	0.164
ENSG00000149136	SSRP1	11	-	57094176	57094988	57094176	57094363	57094899	57094988	72,73,103	228252218	9,8,4	403399358	76	38	0	0	0.136,0.127,0.191	0.011,0.01,0.006	0.142
ENSG00000136826	KLF4	9	-	110249308	110250548	110249308	110249473	110249575	110250548	159173197	6,3,7	2,7,5	9,14,16	76	38	0	0	0.93,0.966,0.934	0.1,0.2,0.135	0.798
ENSG00000178035	IMPDH2	3	-	49065863	49066239	49065863	49065965	49066190	49066239	76,93,100	320350273	38,51,52	458722671	76	38	0	0	0.106,0.117,0.155	0.04,0.034,0.037	0.089
ENSG00000185163	DDX51	12	-	132626042	132626735	132626042	132626501	132626663	132626735	120,98,161	4,3,1	15,21,11	24,36,29	76	38	0	0	0.938,0.942,0.988	0.238,0.226,0.159	0.748
ENSG00000169908	TM4SF1	3	-	149093229	149093556	149093229	149093375	149093466	149093556	8209901227	142163178	159174127	128413011149	76	38	0	0	0.743,0.752,0.775	0.058,0.063,0.052	0.699
ENSG00000128422	KRT17	17	-	39777844	39778763	39777844	39778006	39778606	39778763	57,42,61	315320372	5,3,5	603587497	76	38	0	0	0.083,0.062,0.076	0.004,0.003,0.005	0.07
ENSG00000100353	EIF3D	22	-	36921710	36922178	36921710	36921756	36922045	36922178	94102109	38,46,58	11,6,4	121153129	76	38	0	0	0.553,0.526,0.484	0.043,0.019,0.015	0.495
ENSG00000214706	IFRD2	3	-	50327359	50327725	50327359	50327517	50327600	50327725	268311403	21,30,36	14,22,17	82,82,59	76	38	0	0	0.865,0.838,0.848	0.079,0.118,0.126	0.743
ENSG00000214706	IFRD2	3	-	50326877	50327193	50326877	50327059	50327142	50327193	98,93,146	24,13,19	23,31,22	37,59,53	76	38	0	0	0.671,0.782,0.793	0.237,0.208,0.172	0.543
ENSG00000132254	ARFIP2	11	-	6500369	6501298	6500369	6500488	6501201	6501298	45,79,72	5,7,11	26,15,15	33,62,58	76	38	0	0	0.818,0.849,0.766	0.283,0.108,0.115	0.642
ENSG00000203875	SNHG5	6	-	86387512	86387750	86387512	86387593	86387671	86387750	384470566	21,27,44	143158113	76,63,72	76	38	0	0	0.901,0.897,0.865	0.485,0.556,0.44	0.394
ENSG00000075624	ACTB	7	-	5567634	5568350	5567634	5567816	5567911	5568350	118213391915	646666926	38,48,58	8721063851	76	38	0	0	0.478,0.501,0.508	0.021,0.022,0.033	0.47
ENSG00000075624	ACTB	7	-	5568791	5569294	5568791	5569031	5569165	5569294	333528512	131189260	20,26,21	295250147	76	38	0	0	0.56,0.583,0.496	0.033,0.049,0.067	0.497
ENSG00000182196	ARL6IP4	12	+	123466503	123467085	123466503	123466621	123467015	123467085	66,79,66	121148119	14,27,14	251204199	76	38	0	0	0.214,0.211,0.217	0.027,0.062,0.034	0.173
ENSG00000160818	GPATCH4	1	-	156565872	156566270	156565872	156565923	156566178	156566270	28,37,49	6,6,4	11,18,10	96,81,92	76	38	0	0	0.7,0.755,0.86	0.054,0.1,0.052	0.703
ENSG00000156261	CCT8	21	-	30439036	30439392	30439036	30439098	30439211	30439392	101,115,98	627611662	36,30,26	855983868	76	38	0	0	0.075,0.086,0.069	0.021,0.015,0.015	0.06
ENSG00000196352	CD55	1	+	207510037	207510754	207510037	207510163	207510673	207510754	132173135	120812971030	123128112	278823852381	76	38	0	0	0.052,0.063,0.062	0.022,0.026,0.023	0.035
ENSG00000138385	SSB	2	+	170664986	170665412	170664986	170665063	170665369	170665412	42,25,44	87105105	5,6,2	186157131	75	37	0	0	0.192,0.105,0.171	0.013,0.019,0.007	0.143
ENSG00000125733	TRIP10	19	+	6750302	6750644	6750302	6750442	6750522	6750644	70,71,82	10,8,6	1,6,7	92114136	76	38	0	0	0.778,0.816,0.872	0.005,0.026,0.025	0.803
ENSG00000171453	POLR1C	6	+	43487443	43488165	43487443	43487923	43488012	43488165	137151181	4,11,5	13,23,23	139136133	76	38	0	0	0.945,0.873,0.948	0.045,0.078,0.08	0.854
ENSG00000171453	POLR1C	6	+	43487443	43487923	43487443	43487576	43487803	43487923	142186233	2,1,4	63,38,34	39,37,40	76	38	0	0	0.973,0.989,0.967	0.447,0.339,0.298	0.615
ENSG00000131795	RBM8A	1	+	145508015	145508284	145508015	145508075	145508209	145508284	249286309	1,5,2	20,25,25	11,10,7	76	38	0	0	0.992,0.966,0.987	0.476,0.556,0.641	0.424
ENSG00000159377	PSMB4	1	+	151373714	151374106	151373714	151373831	151374017	151374106	176219222	818870823	56,64,71	85510931232	76	38	0	0	0.097,0.112,0.119	0.032,0.028,0.028	0.08
ENSG00000102103	PQBP1	X	+	48759509	48760361	48759509	48760072	48760204	48760361	51,59,84	30,28,35	9,20,15	172147151	76	38	0	0	0.459,0.513,0.545	0.025,0.064,0.047	0.46
ENSG00000059804	SLC2A3	12	-	8082279	8083238	8082279	8082467	8083075	8083238	91103115	12,7,11	6,15,5	51,76,48	76	38	0	0	0.791,0.88,0.839	0.056,0.09,0.05	0.771
ENSG00000165792	METTL17	14	+	21458388	21458757	21458388	21458542	21458622	21458757	72,83,87	19,29,24	40,58,37	65,76,92	76	38	0	0	0.655,0.589,0.644	0.235,0.276,0.167	0.403
ENSG00000089693	MLF2	12	-	6859342	6859932	6859342	6859471	6859878	6859932	22,34,29	40,64,47	8,5,2	111104103	76	38	0	0	0.216,0.21,0.236	0.035,0.023,0.01	0.198
ENSG00000172432	GTPBP2	6	-	43592624	43593297	43592624	43592799	43593099	43593297	53,51,72	0,1,1	38,42,44	29,38,33	76	38	0	0	1.0,0.962,0.973	0.396,0.356,0.4	0.594
ENSG00000172432	GTPBP2	6	-	43588226	43589904	43588226	43589527	43589739	43589904	69,75,56	1,4,4	17,22,24	101,88,91	76	38	0	0	0.972,0.904,0.875	0.078,0.111,0.117	0.815
ENSG00000244045	TMEM199	17	+	26687551	26687870	26687551	26687594	26687757	26687870	33,45,67	1,4,5	3,4,3	11,22,10	75	37	0	0	0.942,0.847,0.869	0.119,0.082,0.129	0.776
ENSG00000162191	UBXN1	11	-	62445810	62446073	62445810	62445880	62445966	62446073	38,40,47	7,12,17	4,5,9	30,29,33	76	38	0	0	0.731,0.625,0.58	0.063,0.079,0.12	0.558
ENSG00000162191	UBXN1	11	-	62444284	62445304	62444284	62444477	62444989	62445304	37,43,52	49,31,45	6,7,6	61,93,82	76	38	0	0	0.274,0.41,0.366	0.047,0.036,0.035	0.311
ENSG00000162191	UBXN1	11	-	62443969	62444477	62443969	62444111	62444284	62444477	81,93,118	27,26,20	16,12,24	32,44,51	76	38	0	0	0.6,0.641,0.747	0.2,0.12,0.19	0.493
ENSG00000108443	RPS6KB1	17	+	58013575	58013902	58013575	58013638	58013824	58013902	23,18,24	7,4,6	4,3,3	18,38,30	76	38	0	0	0.622,0.692,0.667	0.1,0.038,0.048	0.598
ENSG00000127824	TUBA4A	2	-	220115915	220116435	220115915	220116045	220116286	220116435	80,87,101	2,15,11	18,17,12	100,91,94	76	38	0	0	0.952,0.744,0.821	0.083,0.085,0.06	0.763
ENSG00000150316	CWC15	11	-	94704140	94704651	94704140	94704229	94704538	94704651	60,84,90	8,13,11	9,14,9	121,103,85	76	38	0	0	0.789,0.764,0.804	0.036,0.064,0.05	0.736
ENSG00000149480	MTA2	11	-	62364787	62365184	62364787	62364887	62365081	62365184	290381548	27,27,24	66,64,43	303330313	76	38	0	0	0.843,0.876,0.919	0.098,0.088,0.064	0.796
ENSG00000234741	GAS5	1	-	173834366	173834685	173834366	173834420	173834608	173834685	8759331174	12,20,12	231260206	49,33,46	76	38	0	0	0.973,0.959,0.98	0.702,0.798,0.691	0.24
ENSG00000234741	GAS5	1	-	173833038	173833442	173833038	173833213	173833394	173833442	98512161456	24,28,30	319357319	70,66,59	76	38	0	0	0.954,0.956,0.96	0.695,0.73,0.73	0.238
ENSG00000234741	GAS5	1	-	173834366	173834685	173834366	173834420	173834647	173834685	568623795	40,53,47	236237189	87100103	70	32	0	0	0.867,0.843,0.885	0.554,0.52,0.456	0.355
ENSG00000234741	GAS5	1	-	173835665	173835934	173835665	173835705	173835898	173835934	121414001984	13,18,23	306332284	57,61,37	64	26	0	0	0.974,0.969,0.972	0.686,0.689,0.757	0.261
ENSG00000234741	GAS5	1	-	173833394	173834420	173833394	173833842	173834366	173834420	125013391605	127128149	459414368	376431380	76	38	0	0	0.831,0.839,0.843	0.379,0.324,0.326	0.495
ENSG00000137409	MTCH1	6	-	36938181	36938470	36938181	36938249	36938422	36938470	37,47,51	24,15,38	6,8,6	60,77,94	76	38	0	0	0.435,0.61,0.402	0.048,0.049,0.031	0.44
ENSG00000156976	EIF4A2	3	+	186502352	186503840	186502352	186502485	186503671	186503840	573572497430	12,22,18	552683566	111,122,93	76	38	0	0	0.996,0.994,0.995	0.713,0.737,0.753	0.261
ENSG00000158941	KIAA1967	8	+	22476662	22477981	22476662	22476868	22477150	22477981	120162176	5,8,7	21,20,29	71,108,75	76	38	0	0	0.923,0.91,0.926	0.129,0.085,0.162	0.794
ENSG00000166012	TAF1D	11	-	93463842	93464382	93463842	93463878	93464315	93464382	788921901	85,84,69	275258233	148138178	68	30	0	0	0.804,0.829,0.852	0.45,0.452,0.366	0.406
ENSG00000127837	AAMP	2	-	219130301	219130669	219130301	219130405	219130553	219130669	30,46,41	23,20,21	14,17,3	63,54,59	76	38	1.11022e-16	1.10715e-15	0.395,0.535,0.494	0.1,0.136,0.025	0.388
ENSG00000185215	TNFAIP2	14	+	103596076	103596461	103596076	103596191	103596338	103596461	18,13,15	7,8,6	5,11,8	61,59,63	76	38	1.11022e-16	1.10715e-15	0.563,0.448,0.556	0.039,0.085,0.06	0.461
ENSG00000156876	SASS6	1	-	100573183	100573560	100573183	100573273	100573365	100573560	13,14,11	1,0,1	10,10,8	36,35,49	76	38	1.11022e-16	1.10715e-15	0.867,1.0,0.846	0.122,0.125,0.075	0.797
ENSG00000025770	NCAPH2	22	+	50961445	50961901	50961445	50961595	50961663	50961901	46,41,52	26,23,32	16,17,10	50,58,58	76	38	1.11022e-16	1.10715e-15	0.469,0.471,0.448	0.138,0.128,0.079	0.348
ENSG00000167965	MLST8	16	+	2258450	2259398	2258450	2258614	2258759	2259398	14,24,23	50,49,44	4,8,4	133140121	76	38	2.22045e-16	2.17984e-15	0.123,0.197,0.207	0.015,0.028,0.016	0.156
ENSG00000235106	LINC00094	9	+	136890966	136893224	136890966	136891212	136891329	136893224	26,25,27	1,2,1	5,7,4	15,16,13	76	38	2.22045e-16	2.17984e-15	0.929,0.862,0.931	0.143,0.179,0.133	0.756
ENSG00000161904	LEMD2	6	-	33746018	33747956	33746018	33746164	33747876	33747956	30,16,35	0,3,1	9,4,10	23,32,25	76	38	2.22045e-16	2.17984e-15	1.0,0.727,0.946	0.164,0.059,0.167	0.761
ENSG00000033030	ZCCHC8	12	-	122967825	122968110	122967825	122967891	122968006	122968110	38,30,34	2,2,1	36,34,43	43,31,41	76	38	2.22045e-16	2.17984e-15	0.905,0.882,0.944	0.295,0.354,0.344	0.579
ENSG00000168291	PDHB	3	-	58417603	58419411	58417603	58417711	58419357	58419411	19,19,21	65,89,68	6,7,4	163240197	76	38	3.33067e-16	3.24451e-15	0.128,0.096,0.134	0.018,0.014,0.01	0.105
ENSG00000100650	SRSF5	14	+	70235898	70237257	70235898	70235968	70237183	70237257	88,57,102	11,5,5	146183136	110,88,94	76	38	3.33067e-16	3.24451e-15	0.8,0.851,0.911	0.399,0.51,0.42	0.411
ENSG00000111364	DDX55	12	+	124090477	124090706	124090477	124090528	124090619	124090706	56,50,95	1,2,0	16,29,23	10,19,12	76	38	5.55112e-16	5.38672e-15	0.966,0.926,1.0	0.444,0.433,0.489	0.509
ENSG00000174483	BBS1	11	+	66283010	66283202	66283010	66283057	66283163	66283202	20,31,31	3,3,0	6,13,10	18,37,26	71	33	6.66134e-16	6.43929e-15	0.756,0.828,1.0	0.134,0.14,0.152	0.719
ENSG00000173039	RELA	11	-	65429157	65429559	65429157	65429306	65429407	65429559	15,15,16	3,3,1	3,3,2	22,21,28	76	38	7.77156e-16	7.48384e-15	0.714,0.714,0.889	0.064,0.067,0.034	0.717
ENSG00000198805	PNP	14	+	20942630	20943107	20942630	20942734	20942931	20943107	137131145	0,3,0	14,15,14	9,7,5	76	38	8.88178e-16	8.52043e-15	1.0,0.956,1.0	0.438,0.517,0.583	0.473
ENSG00000172354	GNB2	7	+	100275120	100275441	100275120	100275283	100275374	100275441	17,36,44	59,81,83	5,2,3	93,94,76	76	38	9.99201e-16	9.54918e-15	0.126,0.182,0.21	0.026,0.011,0.019	0.154
ENSG00000134222	PSRC1	1	-	109823398	109823873	109823398	109823668	109823758	109823873	67,61,76	0,0,0	36,56,45	18,22,14	76	38	1.88738e-15	1.79693e-14	1.0,1.0,1.0	0.5,0.56,0.616	0.441
ENSG00000139613	SMARCC2	12	-	56574760	56575381	56574760	56574885	56575265	56575381	52,55,35	27,24,24	34,33,31	71,97,104	76	38	2.55351e-15	2.422e-14	0.491,0.534,0.422	0.193,0.145,0.13	0.326
ENSG00000123066	MED13L	12	-	116412975	116413543	116412975	116413118	116413319	116413543	14,8,11	1,1,1	4,4,7	28,28,28	76	38	2.88658e-15	2.72766e-14	0.875,0.8,0.846	0.067,0.067,0.111	0.759
ENSG00000135446	CDK4	12	-	58144989	58145519	58144989	58145125	58145282	58145519	24,17,24	45,61,55	9,7,9	178158124	76	38	4.66294e-15	4.38977e-14	0.211,0.122,0.179	0.025,0.022,0.035	0.143
ENSG00000133895	MEN1	11	-	64573106	64573840	64573106	64573242	64573703	64573840	14,29,28	9,9,11	24,24,18	87,92,87	76	38	4.77396e-15	4.47758e-14	0.438,0.617,0.56	0.121,0.115,0.094	0.428
ENSG00000074266	EED	11	+	85974986	85977258	85974986	85975305	85977124	85977258	8,6,10	5,1,3	8,3,4	96,92,70	76	38	8.77076e-15	8.19579e-14	0.444,0.75,0.625	0.04,0.016,0.028	0.578
ENSG00000096746	HNRNPH3	10	+	70096955	70098444	70096955	70097090	70098259	70098444	62,74,63	3,4,4	27,26,17	18,18,16	76	38	1.27676e-14	1.18866e-13	0.912,0.902,0.887	0.429,0.419,0.347	0.502
ENSG00000102317	RBM3	X	+	48433948	48434807	48433948	48434055	48434701	48434807	122133240	192199274	55,45,37	202189154	76	38	1.28786e-14	1.19458e-13	0.241,0.25,0.305	0.12,0.106,0.107	0.154
ENSG00000204469	PRRC2A	6	+	31605010	31605548	31605010	31605101	31605222	31605548	43,67,52	5,1,5	2,10,11	30,20,10	76	38	1.36557e-14	1.26203e-13	0.811,0.971,0.839	0.032,0.2,0.355	0.678
ENSG00000169714	CNBP	3	-	128889921	128890381	128889921	128890120	128890288	128890381	29,40,48	22,41,46	17,23,16	94,98,70	76	38	1.9873e-14	1.82991e-13	0.397,0.328,0.343	0.083,0.105,0.103	0.259
ENSG00000164855	TMEM184A	7	-	1588154	1589581	1588154	1588324	1589489	1589581	56,54,55	1,3,1	43,46,40	22,29,20	76	38	2.91989e-14	2.67886e-13	0.966,0.9,0.965	0.494,0.442,0.5	0.465
ENSG00000164054	SHISA5	3	-	48510759	48511242	48510759	48510972	48511126	48511242	22,23,18	47,46,50	6,5,10	81155128	76	38	3.43059e-14	3.13601e-13	0.19,0.2,0.153	0.036,0.016,0.038	0.151
ENSG00000161013	MGAT4B	5	-	179228333	179228694	179228333	179228467	179228553	179228694	33,39,63	17,22,28	15,26,10	52,53,46	76	38	3.60822e-14	3.28648e-13	0.493,0.47,0.529	0.126,0.197,0.098	0.357
ENSG00000077152	UBE2T	1	-	202302137	202302463	202302137	202302221	202302364	202302463	21,31,16	14,14,11	28,44,35	133144116	76	38	3.81917e-14	3.4661e-13	0.429,0.525,0.421	0.095,0.133,0.131	0.339
ENSG00000028310	BRD9	5	-	868721	869234	868721	868919	869152	869234	46,60,62	4,5,3	25,35,33	32,35,19	76	38	5.41789e-14	4.8994e-13	0.852,0.857,0.912	0.281,0.333,0.465	0.514
ENSG00000143774	GUK1	1	+	228333211	228333768	228333211	228333325	228333726	228333768	44,46,45	89,103,79	6,11,17	107111122	74	36	5.9508e-14	5.36209e-13	0.194,0.178,0.217	0.027,0.046,0.063	0.151
ENSG00000198563	DDX39B	6	-	31500556	31503262	31500556	31500688	31503143	31503262	169187160	75,75,93	76,106,95	147124129	76	38	6.81677e-14	6.12054e-13	0.53,0.555,0.462	0.205,0.299,0.269	0.258
ENSG00000139579	OBFC2B	12	+	56619962	56620203	56619962	56620044	56620139	56620203	18,17,21	43,48,51	2,2,4	96,78,90	76	38	7.61613e-14	6.81401e-13	0.173,0.15,0.171	0.01,0.013,0.022	0.15
ENSG00000070814	TCOF1	5	+	149755283	149755893	149755283	149755472	149755644	149755893	22,26,37	10,10,14	9,15,12	40,40,37	76	38	8.37108e-14	7.46298e-13	0.524,0.565,0.569	0.101,0.158,0.14	0.42
ENSG00000112739	PRPF4B	6	+	4056554	4057421	4056554	4056669	4057269	4057421	28,37,35	0,1,1	14,12,16	12,17,15	76	38	9.33698e-14	8.29479e-13	1.0,0.949,0.946	0.368,0.261,0.348	0.639
ENSG00000234741	GAS5	1	-	173833394	173833644	173833394	173833442	173833621	173833644	429506635	8,10,11	75,60,94	15,6,17	55	17	9.37028e-14	8.29517e-13	0.943,0.94,0.947	0.607,0.756,0.631	0.279
ENSG00000162231	NXF1	11	-	62566010	62567958	62566010	62566047	62567848	62567958	20,16,13	0,1,1	7,9,4	16,20,21	69	31	1.03917e-13	9.16721e-13	1.0,0.878,0.854	0.164,0.168,0.079	0.774
ENSG00000161013	MGAT4B	5	-	179226505	179227068	179226505	179226636	179226953	179227068	34,51,47	26,26,36	17,17,13	58,66,54	76	38	1.25011e-13	1.09897e-12	0.395,0.495,0.395	0.128,0.114,0.107	0.312
ENSG00000175166	PSMD2	3	+	184021107	184021537	184021107	184021254	184021430	184021537	103108185	3,6,8	7,7,4	8,5,8	76	38	1.32228e-13	1.15837e-12	0.945,0.9,0.92	0.304,0.412,0.2	0.616
ENSG00000167792	NDUFV1	11	+	67377851	67378678	67377851	67378041	67378465	67378678	44,72,65	135131139	17,28,22	186196162	76	38	1.71752e-13	1.49941e-12	0.14,0.216,0.19	0.044,0.067,0.064	0.124
ENSG00000042429	MED17	11	+	93526893	93527201	93526893	93527030	93527116	93527201	44,56,63	20,13,7	25,24,21	67,50,61	76	38	2.16827e-13	1.88639e-12	0.524,0.683,0.818	0.157,0.194,0.147	0.509
ENSG00000090905	TNRC6A	16	+	24816334	24817054	24816334	24816472	24816925	24817054	23,18,18	2,0,2	2,0,4	11,14,11	76	38	2.3137e-13	2.00601e-12	0.852,1.0,0.818	0.083,0.0,0.154	0.811
ENSG00000149136	SSRP1	11	-	57095770	57097612	57095770	57095900	57097566	57097612	52,73,75	27,41,41	20,12,9	33,64,46	76	38	2.5191e-13	2.1766e-12	0.491,0.471,0.478	0.233,0.086,0.089	0.344
ENSG00000175467	SART1	11	+	65733546	65734027	65733546	65733689	65733820	65734027	7,23,22	16,21,15	3,3,2	68,58,53	76	38	2.5635e-13	2.20741e-12	0.179,0.354,0.423	0.022,0.025,0.019	0.297
ENSG00000168291	PDHB	3	-	58415434	58415965	58415434	58415526	58415854	58415965	25,16,30	55,62,85	5,9,6	125146116	76	38	3.15747e-13	2.70963e-12	0.185,0.114,0.15	0.02,0.03,0.025	0.125
ENSG00000130717	UCK1	9	-	134404330	134404657	134404330	134404425	134404514	134404657	11,19,18	0,1,5	2,6,2	32,21,27	76	38	3.40838e-13	2.91504e-12	1.0,0.905,0.643	0.03,0.125,0.036	0.786
ENSG00000109113	RAB34	17	-	27042658	27042919	27042658	27042723	27042817	27042919	13,10,20	55,68,78	1,1,4	138161132	76	38	3.55271e-13	3.02821e-12	0.106,0.068,0.114	0.004,0.003,0.015	0.089
ENSG00000104915	STX10	19	-	13255223	13255485	13255223	13255300	13255390	13255485	49,30,34	31,30,25	22,16,17	82,85,54	76	38	3.6593e-13	3.10855e-12	0.441,0.333,0.405	0.118,0.086,0.136	0.28
ENSG00000185163	DDX51	12	-	132625375	132625965	132625375	132625565	132625819	132625965	62,66,82	3,1,5	12,15,6	11,10,14	76	38	4.05342e-13	3.43181e-12	0.912,0.971,0.891	0.353,0.429,0.176	0.605
ENSG00000145916	RMND5B	5	+	177569583	177569993	177569583	177569729	177569852	177569993	20,30,35	2,1,2	3,4,4	6,13,10	76	38	4.51861e-13	3.81286e-12	0.833,0.938,0.897	0.2,0.133,0.167	0.723
ENSG00000197037	ZNF498	7	+	99217183	99219197	99217183	99217616	99218995	99219197	28,20,36	0,0,4	5,6,6	8,14,15	76	38	5.01488e-13	4.21751e-12	1.0,1.0,0.818	0.238,0.176,0.167	0.746
ENSG00000107175	CREB3	9	+	35732992	35733279	35732992	35733140	35733211	35733279	28,31,48	28,30,22	16,11,8	72,74,64	76	38	5.12923e-13	4.29935e-12	0.333,0.341,0.522	0.1,0.069,0.059	0.323
ENSG00000125450	NUP85	17	+	73230731	73231296	73230731	73230883	73231194	73231296	38,30,41	4,7,10	23,23,22	42,38,37	76	38	5.38236e-13	4.49659e-12	0.826,0.682,0.672	0.215,0.232,0.229	0.501
ENSG00000171863	RPS7	2	+	3622914	3623274	3622914	3623038	3623181	3623274	42,49,67	2,4,5	7,9,9	10,21,7	76	38	8.21121e-13	6.83725e-12	0.913,0.86,0.87	0.259,0.176,0.391	0.606
ENSG00000133641	C12orf29	12	+	88437375	88439556	88437375	88437492	88439358	88439556	10,12,20	5,8,5	4,1,4	32,38,32	76	38	9.5024e-13	7.88637e-12	0.5,0.429,0.667	0.059,0.013,0.059	0.488
ENSG00000126822	PLEKHG3	14	+	65198078	65198524	65198078	65198261	65198431	65198524	15,24,39	1,0,2	6,6,8	10,12,13	76	38	1.19105e-12	9.8525e-12	0.882,1.0,0.907	0.231,0.2,0.235	0.708
ENSG00000182979	MTA1	14	+	105916394	105916661	105916394	105916521	105916597	105916661	3,1,11	85,55,73	43,55,61	117120107	76	38	1.72085e-12	1.41885e-11	0.017,0.009,0.07	0.155,0.186,0.222	-0.156
ENSG00000198755	RPL10A	6	+	35436723	35437306	35436723	35437062	35437157	35437306	264332304	0,1,0	144226160	11,13,12	76	38	2.22611e-12	1.82947e-11	1.0,0.994,1.0	0.867,0.897,0.87	0.12
ENSG00000159069	FBXW5	9	-	139836497	139837147	139836497	139836918	139836998	139837147	41,58,74	62,76,76	29,41,26	134149119	76	38	2.24287e-12	1.83726e-11	0.248,0.276,0.327	0.098,0.121,0.098	0.178
ENSG00000159352	PSMD4	1	+	151237307	151237710	151237307	151237394	151237641	151237710	53,43,58	219244266	38,26,40	559511421	76	38	2.44249e-12	1.99431e-11	0.108,0.081,0.098	0.033,0.025,0.045	0.061
ENSG00000049656	CLPTM1L	5	-	1324877	1325931	1324877	1324928	1325865	1325931	26,38,37	380479384	10,15,16	773719573	76	38	3.54439e-12	2.88467e-11	0.033,0.038,0.046	0.006,0.01,0.014	0.029
ENSG00000092203	TOX4	14	+	21955609	21957009	21955609	21955852	21956748	21957009	11,20,12	5,6,5	2,5,1	16,24,26	76	38	3.64597e-12	2.95781e-11	0.524,0.625,0.545	0.059,0.094,0.019	0.507
ENSG00000134575	ACP2	11	-	47269191	47269684	47269191	47269278	47269588	47269684	19,21,23	10,16,18	6,7,6	56,30,35	76	38	3.66873e-12	2.96352e-11	0.487,0.396,0.39	0.051,0.104,0.079	0.346
ENSG00000102225	CDK16	X	+	47086392	47086622	47086392	47086498	47086579	47086622	13,27,54	57,43,52	6,19,7	149151127	75	37	3.6765e-12	2.96352e-11	0.101,0.237,0.339	0.019,0.058,0.026	0.191
ENSG00000103507	BCKDK	16	+	31120993	31121445	31120993	31121104	31121397	31121445	37,45,69	18,23,18	14,18,8	23,62,41	76	38	4.29468e-12	3.45079e-11	0.507,0.495,0.657	0.233,0.127,0.089	0.403
ENSG00000178035	IMPDH2	3	-	49061757	49062235	49061757	49061837	49061927	49062235	86,98,78	376410408	51,69,50	631698624	76	38	4.40825e-12	3.5308e-11	0.103,0.107,0.087	0.039,0.047,0.039	0.057
ENSG00000172053	QARS	3	-	49135785	49136125	49135785	49135913	49136032	49136125	12,15,16	47,62,66	0,1,2	103,95,86	76	38	4.72455e-12	3.77217e-11	0.113,0.108,0.108	0.0,0.005,0.011	0.104
ENSG00000175110	MRPS22	3	+	139069020	139069902	139069020	139069164	139069818	139069902	15,24,18	25,26,26	10,11,15	114,76,101	76	38	5.27278e-12	4.1966e-11	0.231,0.316,0.257	0.042,0.067,0.069	0.209
ENSG00000138073	PREB	2	-	27355984	27356589	27355984	27356205	27356399	27356589	7,14,4	1,1,0	10,19,13	64,55,58	76	38	5.46618e-12	4.33685e-11	0.778,0.875,1.0	0.072,0.147,0.101	0.778
ENSG00000173812	EIF1	17	+	39846029	39846441	39846029	39846193	39846339	39846441	36,34,71	19,15,22	14,19,18	44,43,33	76	38	5.65004e-12	4.46866e-11	0.486,0.531,0.617	0.137,0.181,0.214	0.367
ENSG00000176058	TPRN	9	-	140086068	140086817	140086068	140086626	140086710	140086817	8,6,16	1,2,1	3,8,4	29,35,36	76	38	6.27165e-12	4.9448e-11	0.8,0.6,0.889	0.049,0.103,0.053	0.695
ENSG00000076706	MCAM	11	-	119181465	119182131	119181465	119181895	119181989	119182131	12,16,24	94,99,100	4,2,12	174287226	76	38	7.08333e-12	5.56737e-11	0.06,0.075,0.107	0.011,0.003,0.026	0.067
ENSG00000068438	FTSJ1	X	+	48339813	48340103	48339813	48339916	48340019	48340103	30,45,50	14,9,6	9,10,10	36,30,22	76	38	7.71228e-12	6.04288e-11	0.517,0.714,0.806	0.111,0.143,0.185	0.533
ENSG00000158941	KIAA1967	8	+	22476129	22476528	22476129	22476241	22476339	22476528	29,28,36	22,13,23	8,4,6	27,34,34	76	38	8.47045e-12	6.61639e-11	0.397,0.519,0.439	0.129,0.056,0.081	0.363
ENSG00000100462	PRMT5	14	-	23397334	23397824	23397334	23397420	23397705	23397824	10,19,24	27,16,28	8,8,9	126,85,92	76	38	1.02612e-11	7.99046e-11	0.156,0.373,0.3	0.031,0.045,0.047	0.235
ENSG00000122952	ZWINT	10	-	58119778	58120144	58119778	58119902	58120053	58120144	122132178	10,9,11	66,81,84	66,45,26	76	38	1.07476e-11	8.34346e-11	0.859,0.88,0.89	0.333,0.474,0.618	0.401
ENSG00000197323	TRIM33	1	-	114940229	114940612	114940229	114940482	114940561	114940612	9,8,6	3,1,1	24,37,24	154122125	76	38	1.1964e-11	9.25924e-11	0.6,0.8,0.75	0.072,0.132,0.088	0.619
ENSG00000060138	CSDA	12	-	10854558	10856747	10854558	10854733	10856658	10856747	109156128	12,16,8	38,36,52	17,15,30	76	38	1.26911e-11	9.79192e-11	0.82,0.83,0.889	0.528,0.545,0.464	0.334
ENSG00000204264	PSMB8	6	-	32810448	32810866	32810448	32810560	32810718	32810866	41,37,28	17,21,24	20,14,11	62,50,54	76	38	1.27514e-11	9.80844e-11	0.547,0.468,0.368	0.139,0.123,0.092	0.343
ENSG00000160948	VPS28	8	-	145651065	145651591	145651065	145651155	145651408	145651591	38,48,56	13,16,11	10,25,16	35,39,25	76	38	1.52001e-11	1.16565e-10	0.594,0.6,0.718	0.125,0.243,0.242	0.434
ENSG00000120708	TGFBI	5	+	135382023	135382704	135382023	135382184	135382539	135382704	0,0,0	59,58,66	15,13,9	50,43,30	76	38	1.7788e-11	1.35997e-10	0.0,0.0,0.0	0.13,0.131,0.13	-0.13
ENSG00000139641	ESYT1	12	+	56524823	56525100	56524823	56524897	56525027	56525100	20,17,23	40,48,49	3,5,4	80,84,63	76	38	1.89085e-11	1.44128e-10	0.2,0.15,0.19	0.018,0.029,0.031	0.154
ENSG00000168137	SETD5	3	+	9516132	9516840	9516132	9516266	9516751	9516840	30,34,32	2,1,1	14,9,14	12,14,13	76	38	2.06903e-11	1.57234e-10	0.882,0.944,0.941	0.368,0.243,0.35	0.602
ENSG00000049656	CLPTM1L	5	-	1321749	1321934	1321749	1321794	1321878	1321934	26,50,45	218188226	12,14,11	262246257	76	38	2.21588e-11	1.67888e-10	0.056,0.117,0.091	0.022,0.028,0.021	0.064
ENSG00000124228	DDX27	20	+	47860165	47860614	47860165	47860240	47860352	47860614	17,28,14	11,16,13	15,25,24	125,85,62	76	38	2.3181e-11	1.75107e-10	0.436,0.467,0.35	0.057,0.128,0.162	0.302
ENSG00000204394	VARS	6	-	31749467	31749729	31749467	31749538	31749623	31749729	33,41,52	27,28,46	7,4,12	46,55,26	76	38	2.93233e-11	2.20844e-10	0.379,0.423,0.361	0.071,0.035,0.188	0.29
ENSG00000128191	DGCR8	22	+	20077191	20077781	20077191	20077334	20077498	20077781	25,31,20	4,3,1	21,24,26	30,32,29	76	38	3.6507e-11	2.74129e-10	0.758,0.838,0.909	0.259,0.273,0.31	0.554
ENSG00000143774	GUK1	1	+	228335106	228335400	228335106	228335245	228335315	228335400	30,48,43	251279206	9,14,13	221323313	76	38	3.76678e-11	2.82005e-10	0.056,0.079,0.095	0.02,0.021,0.02	0.056
ENSG00000197756	RPL37A	2	+	217364671	217366190	217364671	217364754	217366063	217366190	121180173	339935533466	61,66,71	335333113197	76	38	4.10136e-11	3.06146e-10	0.017,0.025,0.024	0.009,0.01,0.011	0.012
ENSG00000068308	OTUD5	X	-	48791736	48792140	48791736	48791885	48791968	48792140	27,24,46	1,2,0	12,13,6	12,12,9	76	38	4.13765e-11	3.07943e-10	0.931,0.857,1.0	0.333,0.351,0.25	0.618
ENSG00000175634	RPS6KB2	11	+	67200596	67200918	67200596	67200687	67200810	67200918	52,77,78	77,84,76	33,27,37	120122107	76	38	4.15813e-11	3.08558e-10	0.252,0.314,0.339	0.121,0.1,0.147	0.179
ENSG00000185163	DDX51	12	-	132626042	132626501	132626042	132626151	132626394	132626501	92101123	0,0,0	20,35,23	7,8,4	76	38	4.34394e-11	3.214e-10	1.0,1.0,1.0	0.588,0.686,0.742	0.328
ENSG00000167548	MLL2	12	-	49424062	49424551	49424062	49424222	49424383	49424551	28,21,30	3,2,4	6,4,3	8,15,12	76	38	4.46984e-11	3.29748e-10	0.824,0.84,0.789	0.273,0.118,0.111	0.65
ENSG00000106263	EIF3B	7	+	2419028	2420375	2419028	2419146	2419838	2420375	152126163	9,13,15	57,60,51	22,27,18	76	38	4.56959e-11	3.36125e-10	0.894,0.829,0.845	0.564,0.526,0.586	0.297
ENSG00000103168	TAF1C	16	-	84214933	84215269	84214933	84215069	84215197	84215269	58,60,78	0,1,0	28,37,37	8,15,10	76	38	5.29425e-11	3.88297e-10	1.0,0.968,1.0	0.636,0.552,0.649	0.377
ENSG00000149532	CPSF7	11	-	61187941	61189080	61187941	61188045	61188861	61189080	11,5,9	5,2,11	15,11,11	117132132	76	38	5.37625e-11	3.93168e-10	0.524,0.556,0.29	0.06,0.04,0.04	0.41
ENSG00000142910	TINAGL1	1	+	32048749	32049176	32048749	32048842	32049061	32049176	10,13,12	7,7,5	0,3,0	24,28,9	76	38	5.56365e-11	4.05696e-10	0.417,0.481,0.545	0.0,0.051,0.0	0.464
ENSG00000204351	SKIV2L	6	+	31930490	31930868	31930490	31930575	31930761	31930868	47,47,63	9,18,15	15,21,12	28,30,24	76	38	6.38336e-11	4.64127e-10	0.723,0.566,0.677	0.211,0.259,0.2	0.432
ENSG00000142208	AKT1	14	-	105239214	105239716	105239214	105239429	105239587	105239716	6,21,11	39,47,51	1,3,5	103137111	76	38	6.5086e-11	4.71874e-10	0.071,0.183,0.097	0.005,0.011,0.022	0.104
ENSG00000167840	ZNF232	17	-	5012220	5013163	5012220	5012347	5012688	5013163	34,43,46	0,1,0	15,19,13	8,10,11	76	38	6.8388e-11	4.94392e-10	1.0,0.956,1.0	0.484,0.487,0.371	0.538
ENSG00000162298	SYVN1	11	-	64900392	64900791	64900392	64900545	64900630	64900791	32,48,59	0,0,0	7,7,11	4,5,8	76	38	7.25524e-11	5.22999e-10	1.0,1.0,1.0	0.467,0.412,0.407	0.571
ENSG00000075711	DLG1	3	-	196792146	196792680	196792146	196792319	196792578	196792680	20,27,24	12,7,16	26,18,21	103,76,66	76	38	8.14379e-11	5.85378e-10	0.455,0.659,0.429	0.112,0.106,0.137	0.396
ENSG00000157456	CCNB2	15	+	59399520	59399869	59399520	59399649	59399755	59399869	12,13,21	13,12,6	6,9,6	60,74,79	76	38	1.11237e-10	7.97306e-10	0.316,0.351,0.636	0.048,0.057,0.037	0.387
ENSG00000197448	GSTK1	7	+	142961640	142962185	142961640	142961769	142962084	142962185	3,3,5	119,141,94	37,38,36	172177182	76	38	1.37584e-10	9.83353e-10	0.012,0.011,0.026	0.097,0.097,0.09	-0.078
ENSG00000066654	THUMPD1	16	-	20744990	20748608	20744990	20747680	20748181	20748608	113133162	0,2,0	72,76,54	12,8,11	76	38	1.45576e-10	1.03753e-09	1.0,0.971,1.0	0.75,0.826,0.711	0.228
ENSG00000175634	RPS6KB2	11	+	67201465	67201746	67201465	67201528	67201668	67201746	22,23,15	50,47,43	3,8,3	82,80,67	76	38	1.6257e-10	1.15539e-09	0.18,0.197,0.149	0.018,0.048,0.022	0.146
ENSG00000101158	TH1L	20	+	57563968	57564695	57563968	57564076	57564542	57564695	46,66,48	99159115	35,33,38	242229227	76	38	1.6502e-10	1.16951e-09	0.189,0.172,0.173	0.067,0.067,0.077	0.108
ENSG00000129347	KRI1	19	-	10675604	10676466	10675604	10675710	10676392	10676466	28,24,34	5,2,0	13,19,11	21,32,11	76	38	2.1039e-10	1.48688e-09	0.737,0.857,1.0	0.236,0.229,0.333	0.599
ENSG00000129460	NGDN	14	+	23946408	23946769	23946408	23946565	23946711	23946769	32,46,38	0,3,0	11,6,6	10,11,4	76	38	2.47467e-10	1.74402e-09	1.0,0.885,1.0	0.355,0.214,0.429	0.629
ENSG00000196642	C9orf86	9	+	139726172	139726822	139726172	139726313	139726716	139726822	12,23,20	24,23,39	8,8,4	76,72,71	76	38	2.69157e-10	1.88634e-09	0.2,0.333,0.204	0.05,0.053,0.027	0.202
ENSG00000147471	PROSC	8	+	37623043	37623264	37623043	37623151	37623228	37623264	43,60,52	1,0,7	6,4,5	7,7,7	68	30	2.69084e-10	1.88634e-09	0.95,1.0,0.766	0.274,0.201,0.24	0.667
ENSG00000132286	FXC1	11	+	6502730	6503082	6502730	6502785	6502986	6503082	61,95,78	0,0,0	1,1,0	1,4,2	76	38	3.37399e-10	2.35806e-09	1.0,1.0,1.0	0.333,0.111,0.0	0.852
ENSG00000047410	TPR	1	-	186310383	186312605	186310383	186310521	186312457	186312605	26,18,20	19,17,35	23,24,14	132114109	76	38	3.49367e-10	2.43495e-09	0.406,0.346,0.222	0.08,0.095,0.06	0.246
ENSG00000161204	ABCF3	3	+	183907042	183907231	183907042	183907065	183907175	183907231	17,19,21	1,1,2	12,2,12	15,18,13	55	17	3.51255e-10	2.44137e-09	0.84,0.854,0.764	0.198,0.033,0.222	0.668
ENSG00000119969	HELLS	10	+	96351985	96352271	96351985	96352069	96352151	96352271	11,9,5	7,8,6	1,2,0	34,28,24	76	38	3.58463e-10	2.48462e-09	0.44,0.36,0.294	0.014,0.034,0.0	0.349
ENSG00000165792	METTL17	14	+	21464059	21464451	21464059	21464110	21464367	21464451	48,46,74	25,11,23	29,47,35	68,67,51	76	38	3.73092e-10	2.57893e-09	0.49,0.676,0.617	0.176,0.26,0.255	0.364
ENSG00000143575	HAX1	1	+	154247629	154247959	154247629	154247736	154247868	154247959	26,30,41	60,63,75	14,22,13	154119101	76	38	4.01948e-10	2.77081e-09	0.178,0.192,0.215	0.043,0.085,0.06	0.132
ENSG00000172354	GNB2	7	+	100274315	100275038	100274315	100274422	100274974	100275038	20,36,26	6,8,8	8,9,8	20,18,19	76	38	4.27169e-10	2.92866e-09	0.625,0.692,0.619	0.167,0.2,0.174	0.465
ENSG00000143702	CEP170	1	-	243349080	243349724	243349080	243349374	243349560	243349724	22,33,18	6,5,7	17,26,24	42,44,48	76	38	4.26525e-10	2.92866e-09	0.647,0.767,0.563	0.168,0.228,0.2	0.46
ENSG00000026036	RTEL1	20	+	62321102	62321563	62321102	62321218	62321439	62321563	12,10,14	3,5,5	3,7,2	23,33,15	76	38	4.49657e-10	3.07448e-09	0.667,0.5,0.583	0.061,0.096,0.063	0.51
ENSG00000132463	GRSF1	4	-	71691012	71691962	71691012	71691148	71691840	71691962	33,45,35	92,90,112	34,50,43	234363341	76	38	5.03231e-10	3.43149e-09	0.152,0.2,0.135	0.068,0.064,0.059	0.099
ENSG00000182196	ARL6IP4	12	+	123465675	123466426	123465675	123465846	123466141	123466426	59,61,70	53,52,48	30,32,27	71,87,68	76	38	5.07986e-10	3.45458e-09	0.358,0.37,0.422	0.174,0.155,0.166	0.218
ENSG00000102030	NAA10	X	-	153197523	153197884	153197523	153197568	153197768	153197884	48,46,61	117,132,99	41,30,26	200195228	76	38	6.81079e-10	4.61925e-09	0.17,0.148,0.236	0.093,0.071,0.054	0.112
ENSG00000172732	MUS81	11	+	65632190	65632794	65632190	65632616	65632690	65632794	48,45,49	6,4,2	25,44,25	27,22,25	76	38	7.25848e-10	4.90969e-09	0.8,0.849,0.925	0.316,0.5,0.333	0.475
ENSG00000030066	NUP160	11	-	47833615	47833981	47833615	47833776	47833853	47833981	30,43,31	5,9,12	43,23,23	47,48,53	76	38	7.95479e-10	5.36629e-09	0.75,0.705,0.564	0.314,0.193,0.178	0.445
ENSG00000145495	2017-03-06	5	+	10400895	10402251	10400895	10400954	10402170	10402251	64,70,78	54,75,53	76,90,71	170204169	76	38	8.56076e-10	5.75968e-09	0.372,0.318,0.424	0.183,0.181,0.174	0.192
ENSG00000135018	UBQLN1	9	-	86281264	86284242	86281264	86281348	86284099	86284242	5,11,9	59,56,48	0,4,2	146148214	76	38	9.43105e-10	6.32833e-09	0.041,0.089,0.086	0.0,0.013,0.005	0.066
ENSG00000147955	SIGMAR1	9	-	34636993	34637417	34636993	34637086	34637216	34637417	46,45,43	66,69,76	29,42,14	138147117	76	38	1.0099e-09	6.75853e-09	0.258,0.246,0.221	0.095,0.125,0.056	0.15
ENSG00000129347	KRI1	19	-	10668227	10668571	10668227	10668358	10668444	10668571	23,13,31	2,2,7	28,38,18	37,47,35	76	38	1.14279e-09	7.6277e-09	0.852,0.765,0.689	0.275,0.288,0.205	0.513
ENSG00000148362	C9orf142	9	+	139887091	139887695	139887091	139887152	139887376	139887695	47,56,49	25,19,29	192299242	30,32,29	76	38	1.38405e-09	9.21359e-09	0.485,0.596,0.458	0.762,0.824,0.807	-0.285
ENSG00000111364	DDX55	12	+	124091978	124092209	124091978	124092070	124092146	124092209	74,88,96	1,3,4	90,78,57	22,27,12	76	38	1.47363e-09	9.78411e-09	0.974,0.936,0.923	0.672,0.591,0.704	0.289
ENSG00000178921	PFAS	17	+	8159584	8159966	8159584	8159725	8159841	8159966	9,13,15	20,25,29	2,13,5	89,93,77	76	38	1.48432e-09	9.82927e-09	0.184,0.206,0.205	0.011,0.065,0.031	0.163
ENSG00000146263	MMS22L	6	-	97717777	97720757	97717777	97717868	97720579	97720757	10,12,16	3,8,8	4,5,8	26,33,39	76	38	1.49214e-09	9.85515e-09	0.625,0.429,0.5	0.071,0.07,0.093	0.44
ENSG00000132300	PTCD3	2	+	86360300	86360559	86360300	86360379	86360468	86360559	28,29,28	48,37,60	33,31,33	148163234	76	38	1.59574e-09	1.05119e-08	0.226,0.282,0.189	0.1,0.087,0.066	0.148
ENSG00000100823	APEX1	14	+	20923384	20923862	20923384	20923548	20923736	20923862	127142116	0,0,1	31,32,23	5,6,4	76	38	1.85875e-09	1.22126e-08	1.0,1.0,0.983	0.756,0.727,0.742	0.253
ENSG00000087460	GNAS	20	+	57484404	57484634	57484404	57484478	57484575	57484634	24,17,31	360381379	5,3,4	370448404	76	38	2.04308e-09	1.33888e-08	0.032,0.022,0.039	0.007,0.003,0.005	0.026
ENSG00000204356	RDBP	6	-	31921505	31921911	31921505	31921608	31921856	31921911	59,79,81	6,7,13	25,39,20	19,20,21	76	38	2.86288e-09	1.87125e-08	0.831,0.849,0.757	0.397,0.494,0.323	0.408
ENSG00000126822	PLEKHG3	14	+	65203570	65204093	65203570	65203609	65204073	65204093	7,8,12	2,0,1	3,5,4	27,48,32	47	9	2.91527e-09	1.90057e-08	0.401,1.0,0.697	0.021,0.02,0.023	0.678
ENSG00000162298	SYVN1	11	-	64897473	64897851	64897473	64897644	64897722	64897851	43,54,62	0,0,1	7,9,6	2,11,6	76	38	3.25181e-09	2.11451e-08	1.0,1.0,0.969	0.636,0.29,0.333	0.57
ENSG00000130305	NSUN5	7	-	72717226	72717737	72717226	72717526	72717596	72717737	7,8,9	2,2,2	5,10,9	17,41,35	76	38	3.91411e-09	2.53864e-08	0.636,0.667,0.692	0.128,0.109,0.114	0.548
ENSG00000167770	OTUB1	11	+	63764001	63764413	63764001	63764120	63764328	63764413	24,24,31	7,7,7	17,19,17	28,28,28	76	38	4.00978e-09	2.59402e-08	0.632,0.632,0.689	0.233,0.253,0.233	0.411
ENSG00000132424	PNISR	6	-	99862447	99864304	99862447	99862566	99864224	99864304	4,11,9	7,6,3	7,7,7	90,76,78	76	38	4.58984e-09	2.96168e-08	0.222,0.478,0.6	0.037,0.044,0.043	0.392
ENSG00000106263	EIF3B	7	+	2419028	2420375	2419028	2419146	2419913	2420375	134110148	14,30,34	96,116,82	73,71,62	76	38	4.74989e-09	3.05714e-08	0.827,0.647,0.685	0.397,0.45,0.398	0.305
ENSG00000172932	ANKRD13D	11	+	67058946	67059217	67058946	67058992	67059073	67059217	7,15,15	0,2,0	3,3,3	8,10,13	76	38	4.84492e-09	3.11036e-08	1.0,0.789,1.0	0.158,0.13,0.103	0.799
ENSG00000256269	HMBS	11	+	118960392	118960777	118960392	118960470	118960699	118960777	8,9,7	17,11,12	4,0,2	44,42,57	76	38	4.88629e-09	3.12896e-08	0.19,0.29,0.226	0.043,0.0,0.017	0.215
ENSG00000165283	STOML2	9	-	35100594	35101008	35100594	35100723	35100928	35101008	33,31,44	6,11,11	12,14,6	19,21,19	76	38	6.36447e-09	4.06521e-08	0.733,0.585,0.667	0.24,0.25,0.136	0.453
ENSG00000070814	TCOF1	5	+	149771106	149771739	149771106	149771220	149771519	149771739	19,31,41	7,10,8	21,14,11	27,28,27	76	38	6.53582e-09	4.16411e-08	0.576,0.608,0.719	0.28,0.2,0.169	0.418
ENSG00000204356	RDBP	6	-	31922331	31922873	31922331	31922669	31922835	31922873	46,43,81	4,2,6	8,10,9	8,5,13	70	32	1.04863e-08	6.66423e-08	0.84,0.908,0.861	0.314,0.478,0.24	0.526
ENSG00000105726	ATP13A1	19	-	19756455	19756794	19756455	19756599	19756682	19756794	14,13,9	42,51,33	1,8,5	111100105	76	38	1.2459e-08	7.89799e-08	0.143,0.113,0.12	0.004,0.038,0.023	0.104
ENSG00000105726	ATP13A1	19	-	19760549	19762606	19760549	19760749	19762497	19762606	12,17,8	19,28,18	3,4,3	36,53,57	76	38	1.28962e-08	8.15468e-08	0.24,0.233,0.182	0.04,0.036,0.026	0.184
ENSG00000105726	ATP13A1	19	-	19766124	19766463	19766124	19766262	19766336	19766463	25,20,20	25,9,7	4,3,10	42,41,21	76	38	1.34584e-08	8.48891e-08	0.333,0.526,0.588	0.045,0.035,0.192	0.392
ENSG00000173171	MTX1	1	+	155180338	155182010	155180338	155180418	155181917	155182010	31,37,45	22,9,11	7,22,9	29,44,30	76	38	1.53696e-08	9.67019e-08	0.413,0.673,0.672	0.108,0.2,0.13	0.44
ENSG00000106397	PLOD3	7	-	100856122	100856485	100856122	100856224	100856387	100856485	13,31,24	67,70,53	9,4,3	73,94,76	76	38	1.54657e-08	9.70649e-08	0.088,0.181,0.185	0.058,0.021,0.019	0.119
ENSG00000151923	TIAL1	10	-	121336122	121336715	121336122	121336262	121336591	121336715	53,32,59	16,24,14	14,14,6	22,54,26	76	38	1.6385e-08	1.02579e-07	0.624,0.4,0.678	0.241,0.115,0.103	0.414
ENSG00000115548	KDM3A	2	+	86718263	86719839	86718263	86718398	86719161	86719839	8,10,11	1,3,0	4,2,4	13,20,22	76	38	1.67462e-08	1.04581e-07	0.8,0.625,1.0	0.133,0.048,0.083	0.72
ENSG00000089053	ANAPC5	12	-	121783641	121784808	121783641	121783834	121784698	121784808	6,7,6	69,74,68	52,60,56	170140130	76	38	1.71567e-08	1.0688e-07	0.042,0.045,0.042	0.133,0.176,0.177	-0.119
ENSG00000214078	CPNE1	20	-	34220084	34220307	34220084	34220156	34220232	34220307	18,32,24	112144113	13,16,12	258227216	76	38	1.98068e-08	1.23085e-07	0.074,0.1,0.096	0.025,0.034,0.027	0.061
ENSG00000103496	STX4	16	+	31051043	31051489	31051043	31051139	31051232	31051489	5,5,8	0,0,1	1,5,5	8,21,24	76	38	2.01407e-08	1.24853e-07	1.0,1.0,0.8	0.059,0.106,0.094	0.847
ENSG00000085978	ATG16L1	2	+	234181611	234182423	234181611	234181698	234182366	234182423	12,15,13	0,1,1	3,4,5	10,8,9	76	38	2.04504e-08	1.26462e-07	1.0,0.882,0.867	0.13,0.2,0.217	0.734
ENSG00000169228	RAB24	5	-	176729128	176729497	176729128	176729179	176729397	176729497	34,39,39	2,0,5	30,43,26	15,29,21	76	38	2.30421e-08	1.4214e-07	0.895,1.0,0.796	0.5,0.426,0.382	0.461
ENSG00000129460	NGDN	14	+	23944379	23944851	23944379	23944517	23944766	23944851	4,8,13	0,1,1	2,1,3	12,8,12	76	38	2.42612e-08	1.49295e-07	1.0,0.8,0.867	0.077,0.059,0.111	0.807
ENSG00000076706	MCAM	11	-	119181465	119181895	119181465	119181613	119181799	119181895	20,23,23	21,36,36	10,16,15	88,79,63	76	38	2.60451e-08	1.59883e-07	0.323,0.242,0.242	0.054,0.092,0.106	0.185
ENSG00000115234	SNX17	2	+	27597555	27598020	27597555	27597625	27597927	27598020	26,28,32	11,14,8	9,16,8	24,27,26	76	38	3.49288e-08	2.13896e-07	0.542,0.5,0.667	0.158,0.229,0.133	0.396
ENSG00000187778	MCRS1	12	-	49959859	49960624	49959859	49959998	49960504	49960624	33,46,41	11,10,12	25,28,18	29,38,19	76	38	3.65446e-08	2.23249e-07	0.6,0.697,0.631	0.301,0.269,0.321	0.346
ENSG00000015479	MATR3	5	+	138650363	138651877	138650363	138650425	138651764	138651877	96,81,78	15,12,15	30,23,27	18,16,20	76	38	4.88434e-08	2.97661e-07	0.762,0.771,0.722	0.455,0.418,0.403	0.326
ENSG00000174365	SNHG11	20	+	37078978	37079564	37078978	37079090	37079175	37079564	49,37,48	0,6,4	14,24,19	12,16,14	76	38	4.95064e-08	3.00975e-07	1.0,0.755,0.857	0.368,0.429,0.404	0.47
ENSG00000163050	ADCK3	1	+	227169727	227170464	227169727	227169850	227170378	227170464	8,5,14	4,1,2	1,3,5	14,23,19	76	38	4.99348e-08	3.0285e-07	0.5,0.714,0.778	0.034,0.061,0.116	0.594
ENSG00000198960	ARMCX6	X	-	100870109	100871756	100870109	100870750	100871661	100871756	15,11,8	1,0,1	1,9,6	13,12,15	76	38	5.52458e-08	3.34257e-07	0.882,1.0,0.8	0.037,0.273,0.167	0.735
ENSG00000126012	KDM5C	X	-	53227671	53228070	53227671	53227819	53227945	53228070	35,51,41	29,63,55	36,66,34	151165110	76	38	6.00395e-08	3.62391e-07	0.376,0.288,0.272	0.107,0.167,0.134	0.176
ENSG00000137312	FLOT1	6	-	30698458	30698877	30698458	30698504	30698695	30698877	14,20,16	13,11,16	3,1,2	18,24,17	76	38	6.33178e-08	3.81267e-07	0.35,0.476,0.333	0.077,0.02,0.056	0.335
ENSG00000141030	COPS3	17	-	17174071	17174322	17174071	17174121	17174209	17174322	13,12,20	8,20,35	5,3,6	42,54,58	76	38	6.67274e-08	4.00841e-07	0.448,0.231,0.222	0.056,0.027,0.049	0.256
ENSG00000130299	GTPBP3	19	+	17449762	17450075	17449762	17449835	17449931	17450075	10,21,24	2,2,4	13,11,13	16,20,17	76	38	6.7002e-08	4.01535e-07	0.714,0.84,0.75	0.289,0.216,0.277	0.507
ENSG00000075415	SLC25A3	12	+	98987402	98987913	98987402	98987518	98987752	98987913	138148234	5,5,4	38,40,28	8,9,4	76	38	7.22258e-08	4.31815e-07	0.932,0.937,0.967	0.704,0.69,0.778	0.221
ENSG00000106346	USP42	7	+	6178722	6179826	6178722	6178825	6179758	6179826	5,12,17	5,1,1	3,4,0	22,33,32	76	38	7.33639e-08	4.37582e-07	0.333,0.857,0.895	0.064,0.057,0.0	0.655
ENSG00000112096	SOD2	6	-	160100095	160103670	160100095	160100330	160103505	160103670	111,96,99	30,18,21	225239193	5,25,12	76	38	7.65691e-08	4.55623e-07	0.649,0.727,0.702	0.957,0.827,0.889	-0.198
ENSG00000036549	ZZZ3	1	-	78045211	78046754	78045211	78045313	78046682	78046754	5,2,7	2,3,2	1,1,2	35,28,33	76	38	7.92633e-08	4.70051e-07	0.556,0.25,0.636	0.014,0.018,0.029	0.46
ENSG00000165802	NELF	9	-	140347187	140347632	140347187	140347271	140347507	140347632	8,9,9	6,8,10	7,22,4	40,84,66	76	38	7.93665e-08	4.70051e-07	0.4,0.36,0.31	0.08,0.116,0.029	0.282
ENSG00000196497	IPO4	14	-	24657549	24657844	24657549	24657629	24657757	24657844	43,45,41	7,10,15	1,11,10	13,19,14	76	38	8.42707e-08	4.97927e-07	0.754,0.692,0.577	0.037,0.224,0.263	0.5
ENSG00000165802	NELF	9	-	140347187	140348272	140347187	140347632	140348182	140348272	9,12,10	10,11,9	11,12,8	57,69,45	76	38	8.56199e-08	5.04717e-07	0.31,0.353,0.357	0.088,0.08,0.082	0.257
ENSG00000120699	EXOSC8	13	+	37577070	37578698	37577070	37577144	37578652	37578698	21,31,37	17,16,16	41,61,40	75101114	76	38	8.66988e-08	5.09886e-07	0.382,0.492,0.536	0.215,0.232,0.149	0.271
ENSG00000010292	NCAPD2	12	+	6623430	6623753	6623430	6623558	6623629	6623753	58,37,54	21,28,23	27,34,39	58,73,53	76	38	9.48593e-08	5.56581e-07	0.58,0.398,0.54	0.189,0.189,0.269	0.29
ENSG00000182199	SHMT2	12	+	57624585	57625696	57624585	57624783	57625495	57625696	124155212	2,4,7	12,21,15	9,5,3	76	38	1.04675e-07	6.12747e-07	0.969,0.951,0.938	0.4,0.677,0.714	0.356
ENSG00000214655	KIAA0913	10	+	75553904	75554397	75553904	75554088	75554298	75554397	16,17,28	1,2,1	6,15,11	10,19,8	76	38	1.08046e-07	6.3102e-07	0.889,0.81,0.933	0.231,0.283,0.407	0.57
ENSG00000163002	NUP35	2	+	184024215	184026408	184024215	184024380	184025781	184026408	3,8,3	0,6,0	0,3,4	57,61,77	76	38	1.11657e-07	6.50603e-07	1.0,0.4,1.0	0.0,0.024,0.025	0.784
ENSG00000160886	LY6K	8	+	143783017	143785582	143783017	143783131	143784508	143785582	168143165	6,6,15	65,71,56	19,12,19	76	38	1.19002e-07	6.91801e-07	0.933,0.923,0.846	0.631,0.747,0.596	0.243
ENSG00000111364	DDX55	12	+	124091978	124093376	124091978	124092209	124093226	124093376	30,14,32	2,8,3	16,16,13	34,38,37	76	38	1.27026e-07	7.36752e-07	0.882,0.467,0.842	0.19,0.174,0.149	0.559
ENSG00000137955	RABGGTB	1	+	76255636	76255959	76255636	76255742	76255836	76255959	80,96,87	2,2,4	124125128	29,23,21	76	38	1.37693e-07	7.96787e-07	0.952,0.96,0.916	0.681,0.731,0.753	0.221
ENSG00000114857	NKTR	3	+	42660511	42661200	42660511	42660619	42661155	42661200	35,18,36	5,8,8	65,43,44	68,74,64	76	38	1.40004e-07	8.08309e-07	0.778,0.529,0.692	0.323,0.225,0.256	0.398
ENSG00000180448	HMHA1	19	+	1080253	1080546	1080253	1080378	1080462	1080546	6,7,11	2,6,6	4,1,0	19,13,27	76	38	1.58885e-07	9.15221e-07	0.6,0.368,0.478	0.095,0.037,0.0	0.438
ENSG00000184863	RBM33	7	+	155530753	155532720	155530753	155531097	155532408	155532720	10,15,19	0,2,0	0,2,1	2,7,6	76	38	1.60061e-07	9.19896e-07	1.0,0.789,1.0	0.0,0.125,0.077	0.862
ENSG00000141959	PFKL	21	+	45733795	45736222	45733795	45733904	45736126	45736222	0,1,1	46,43,54	10,17,11	37,56,43	76	38	1.71148e-07	9.81376e-07	0.0,0.011,0.009	0.119,0.132,0.113	-0.115
ENSG00000126581	BECN1	17	-	40970804	40971627	40970804	40970895	40971565	40971627	10,8,15	45,63,47	40,44,43	52,65,55	76	38	1.72844e-07	9.88857e-07	0.1,0.06,0.138	0.278,0.253,0.281	-0.171
ENSG00000147162	OGT	X	+	70764416	70767873	70764416	70764485	70767756	70767873	45,37,51	25,35,40	210346258	68,75,73	76	38	1.8495e-07	1.05394e-06	0.474,0.346,0.389	0.607,0.698,0.639	-0.245
ENSG00000100241	SBF1	22	-	50905960	50906352	50905960	50906119	50906214	50906352	6,1,13	13,20,23	0,0,0	49,43,33	76	38	1.85056e-07	1.05394e-06	0.188,0.024,0.22	0.0,0.0,0.0	0.144
ENSG00000149823	C11orf2	11	+	64877176	64878075	64877176	64877395	64877953	64878075	23,30,38	34,42,44	8,14,15	64,60,48	76	38	1.93454e-07	1.09929e-06	0.253,0.263,0.302	0.059,0.104,0.135	0.173
ENSG00000204356	RDBP	6	-	31922331	31922873	31922331	31922654	31922835	31922873	57,53,93	3,11,5	36,54,45	24,22,33	70	32	2.03629e-07	1.15451e-06	0.897,0.688,0.895	0.407,0.529,0.384	0.387
ENSG00000143416	SELENBP1	1	-	151341479	151342030	151341479	151341665	151341917	151342030	2,0,1	22,27,19	24,30,16	37,36,35	76	38	2.56173e-07	1.44916e-06	0.043,0.0,0.026	0.245,0.294,0.186	-0.219
ENSG00000109332	UBE2D3	4	-	103722610	103723795	103722610	103722716	103723717	103723795	14,23,16	1,1,4	0,3,5	8,8,9	76	38	2.64832e-07	1.49479e-06	0.875,0.92,0.667	0.0,0.158,0.217	0.696
ENSG00000170889	RPS9	19	+	54710420	54711515	54710420	54710592	54711265	54711515	53,79,100	2,1,0	21,38,34	6,5,11	76	38	2.81402e-07	1.58477e-06	0.93,0.975,1.0	0.636,0.792,0.607	0.29
ENSG00000176986	SEC24C	10	+	75529104	75529491	75529104	75529243	75529372	75529491	2,8,2	6,11,8	2,2,2	67,68,55	76	38	2.86166e-07	1.60801e-06	0.143,0.267,0.111	0.015,0.014,0.018	0.158
ENSG00000161204	ABCF3	3	+	183906875	183907065	183906875	183906932	183907042	183907065	11,10,13	1,4,1	2,4,4	5,17,22	55	17	2.96319e-07	1.66136e-06	0.773,0.436,0.801	0.11,0.068,0.053	0.593
ENSG00000123154	WDR83	19	+	12780568	12780894	12780568	12780707	12780790	12780894	28,29,37	3,3,3	20,12,7	13,11,10	76	38	3.19716e-07	1.78824e-06	0.824,0.829,0.86	0.435,0.353,0.259	0.489
ENSG00000133247	SUV420H2	19	+	55853161	55853748	55853161	55853414	55853582	55853748	30,35,35	1,0,0	8,13,11	2,12,10	76	38	3.20367e-07	1.78824e-06	0.938,1.0,1.0	0.667,0.351,0.355	0.522
ENSG00000175197	DDIT3	12	-	57911051	57911536	57911051	57911221	57911488	57911536	70,77,84	0,0,0	29,28,33	5,5,5	76	38	4.10783e-07	2.28283e-06	1.0,1.0,1.0	0.744,0.737,0.767	0.251
ENSG00000173039	RELA	11	-	65429407	65429676	65429407	65429559	65429649	65429676	20,27,38	1,0,0	4,9,6	7,6,3	59	21	4.0995e-07	2.28283e-06	0.877,1.0,1.0	0.169,0.348,0.416	0.648
ENSG00000115234	SNX17	2	+	27596951	27597300	27596951	27597042	27597212	27597300	14,17,15	14,8,14	1,2,3	20,22,13	76	38	4.83557e-07	2.68135e-06	0.333,0.515,0.349	0.024,0.043,0.103	0.342
ENSG00000129084	PSMA1	11	-	14535362	14536037	14535362	14535433	14535948	14536037	56,79,79	193191194	251188173	333271266	76	38	4.94668e-07	2.73695e-06	0.127,0.171,0.169	0.274,0.258,0.245	-0.103
ENSG00000100938	GMPR2	14	+	24707451	24708448	24707451	24707611	24707794	24708448	20,32,25	10,6,6	15,20,18	29,27,33	76	38	4.95827e-07	2.73736e-06	0.5,0.727,0.676	0.205,0.27,0.214	0.405
ENSG00000196497	IPO4	14	-	24652661	24652873	24652661	24652719	24652795	24652873	19,23,22	11,15,21	3,4,3	10,28,17	76	38	5.17538e-07	2.85098e-06	0.463,0.434,0.344	0.13,0.067,0.081	0.321
ENSG00000138035	PNPT1	2	-	55907846	55908053	55907846	55907894	55907989	55908053	18,17,16	10,9,12	4,9,8	19,21,33	76	38	5.18974e-07	2.85266e-06	0.474,0.486,0.4	0.095,0.176,0.108	0.327
ENSG00000173020	ADRBK1	11	+	67048202	67048655	67048202	67048254	67048563	67048655	9,8,20	10,10,17	8,10,3	35,42,38	76	38	5.27416e-07	2.89276e-06	0.31,0.286,0.37	0.103,0.106,0.038	0.24
ENSG00000142949	PTPRF	1	+	44085765	44086250	44085765	44085892	44086124	44086250	13,14,15	19,26,33	4,0,0	26,20,40	76	38	5.42865e-07	2.97104e-06	0.255,0.212,0.185	0.071,0.0,0.0	0.194
ENSG00000165792	METTL17	14	+	21458138	21458542	21458138	21458236	21458388	21458542	26,28,27	1,3,0	4,17,12	8,10,11	76	38	5.94288e-07	3.24543e-06	0.929,0.824,1.0	0.2,0.459,0.353	0.58
ENSG00000189046	ALKBH2	12	-	109530311	109531277	109530311	109530592	109531051	109531277	35,38,58	0,1,0	15,13,13	7,3,6	76	38	5.99525e-07	3.26696e-06	1.0,0.95,1.0	0.517,0.684,0.52	0.41
ENSG00000103067	ESRP2	16	-	68266479	68266718	68266479	68266590	68266663	68266718	24,31,35	9,1,8	40,33,38	48,63,52	76	38	6.65955e-07	3.62113e-06	0.571,0.939,0.686	0.294,0.208,0.268	0.475
ENSG00000182944	EWSR1	22	+	29694722	29695841	29694722	29695270	29695588	29695841	157189168	4,5,5	116146147	15,19,17	76	38	6.99612e-07	3.79596e-06	0.952,0.95,0.944	0.795,0.793,0.812	0.149
ENSG00000169045	HNRNPH1	5	-	179050037	179051670	179050037	179050165	179050636	179051670	204192219	1,1,3	24,38,25	2,4,4	76	38	7.18403e-07	3.88955e-06	0.99,0.99,0.973	0.857,0.826,0.758	0.171
ENSG00000129422	MTUS1	8	-	17510933	17512175	17510933	17511007	17512069	17512175	7,8,7	5,3,2	4,4,1	26,23,10	76	38	7.35253e-07	3.97226e-06	0.412,0.571,0.636	0.071,0.08,0.048	0.473
ENSG00000181789	COPG1	3	+	128971465	128971798	128971465	128971537	128971718	128971798	17,17,14	22,23,31	6,5,6	45,47,42	76	38	8.05687e-07	4.34348e-06	0.279,0.27,0.184	0.063,0.051,0.067	0.184
ENSG00000113240	CLK4	5	-	178044344	178045779	178044344	178044435	178045556	178045779	8,19,21	0,0,2	18,30,27	18,26,18	76	38	8.78373e-07	4.72524e-06	1.0,1.0,0.84	0.333,0.366,0.429	0.571
ENSG00000149809	TM7SF2	11	+	64882184	64882553	64882184	64882304	64882384	64882553	12,14,28	1,1,3	12,8,10	12,16,8	76	38	9.00701e-07	4.83504e-06	0.857,0.875,0.824	0.333,0.2,0.385	0.546
ENSG00000162191	UBXN1	11	-	62446161	62446537	62446161	62446215	62446336	62446537	21,19,19	5,14,9	3,6,4	23,18,13	76	38	9.8853e-07	5.29525e-06	0.677,0.404,0.514	0.061,0.143,0.133	0.419
ENSG00000008128	CDK11A	1	-	1634914	1635379	1634914	1635063	1635262	1635379	32,26,32	1,0,1	5,5,5	4,5,3	76	38	1.04777e-06	5.60071e-06	0.941,1.0,0.941	0.385,0.333,0.455	0.57
ENSG00000177082	WDR73	15	-	85191120	85191856	85191120	85191185	85191767	85191856	18,13,17	0,0,1	18,28,16	16,16,13	76	38	1.05129e-06	5.60762e-06	1.0,1.0,0.895	0.36,0.467,0.381	0.562
ENSG00000100395	L3MBTL2	22	+	41623092	41623873	41623092	41623327	41623807	41623873	6,10,17	5,4,5	6,4,5	23,26,17	76	38	1.05494e-06	5.61524e-06	0.375,0.556,0.63	0.115,0.071,0.128	0.416
ENSG00000114739	ACVR2B	3	+	38519631	38520009	38519631	38519783	38519865	38520009	10,6,13	0,1,0	0,1,1	4,7,4	76	38	1.15039e-06	6.11039e-06	1.0,0.75,1.0	0.0,0.067,0.111	0.857
ENSG00000076984	MAP2K7	19	+	7974947	7975258	7974947	7975014	7975144	7975258	4,13,7	0,0,1	1,6,2	12,15,3	76	38	1.209e-06	6.40821e-06	1.0,1.0,0.778	0.04,0.167,0.25	0.774
ENSG00000177697	CD151	11	+	836250	836843	836250	836442	836768	836843	23,31,37	83,80,92	14,27,21	132163162	76	38	1.28773e-06	6.81121e-06	0.122,0.162,0.167	0.05,0.076,0.061	0.088
ENSG00000089053	ANAPC5	12	-	121756079	121756411	121756079	121756227	121756303	121756411	5,10,11	42,37,53	51,46,51	79,79,64	76	38	1.3168e-06	6.95041e-06	0.056,0.119,0.094	0.244,0.225,0.285	-0.162
ENSG00000105193	RPS16	19	-	39924161	39924401	39924161	39924209	39924304	39924401	49,41,49	334334272	34,32,15	508427300	76	38	1.36014e-06	7.16418e-06	0.068,0.058,0.083	0.032,0.036,0.024	0.039
ENSG00000167778	SPRYD3	12	-	53468432	53469003	53468432	53468568	53468878	53469003	7,4,5	0,2,3	1,0,4	16,41,24	76	38	1.50427e-06	7.9068e-06	1.0,0.5,0.455	0.03,0.0,0.077	0.616
ENSG00000185163	DDX51	12	-	132625375	132625965	132625375	132625565	132625647	132625965	57,44,78	0,0,0	9,13,2	3,4,4	76	38	1.5269e-06	8.00908e-06	1.0,1.0,1.0	0.6,0.619,0.2	0.527
ENSG00000234741	GAS5	1	-	173834994	173835344	173834994	173835032	173835314	173835344	590682795	0,5,10	121129127	5,6,5	56	18	1.55028e-06	8.11486e-06	1.0,0.978,0.962	0.886,0.874,0.891	0.096
ENSG00000106144	CASP2	7	+	142997296	143001026	142997296	142997387	143000876	143001026	5,7,7	1,4,3	3,3,1	19,15,18	76	38	1.57771e-06	8.24134e-06	0.714,0.467,0.538	0.073,0.091,0.027	0.509
ENSG00000241370	RPP21	6	+	30313074	30314334	30313074	30313350	30314208	30314334	20,26,19	15,33,15	11,14,18	39,53,59	76	38	1.6616e-06	8.66163e-06	0.4,0.283,0.388	0.124,0.117,0.132	0.233
ENSG00000159069	FBXW5	9	-	139836998	139837395	139836998	139837147	139837220	139837395	56,91,106	77,75,78	35,74,57	99128137	76	38	1.70463e-06	8.86759e-06	0.267,0.378,0.405	0.15,0.224,0.172	0.168
ENSG00000127054	CPSF3L	1	-	1247972	1248504	1247972	1248329	1248414	1248504	27,28,36	40,55,37	21,31,19	104,106,83	76	38	1.7156e-06	8.90629e-06	0.252,0.203,0.327	0.092,0.128,0.103	0.153
ENSG00000103496	STX4	16	+	31045546	31045857	31045546	31045646	31045782	31045857	10,9,10	1,2,3	5,16,4	22,23,16	76	38	1.73521e-06	8.98958e-06	0.833,0.692,0.625	0.102,0.258,0.111	0.56
ENSG00000064961	HMG20B	19	+	3573689	3574584	3573689	3573798	3574380	3574584	25,53,55	13,22,14	21,42,16	35,43,33	76	38	1.80549e-06	9.33453e-06	0.49,0.546,0.663	0.231,0.328,0.195	0.315
ENSG00000143793	C1orf35	1	-	228289780	228290083	228289780	228289866	228290010	228290083	18,35,17	0,0,1	7,6,4	3,8,5	76	38	1.94605e-06	1.00407e-05	1.0,1.0,0.895	0.538,0.273,0.286	0.599
ENSG00000164062	APEH	3	+	49712615	49713220	49712615	49712742	49713126	49713220	24,21,15	12,17,34	6,4,5	41,36,33	76	38	1.97278e-06	1.01578e-05	0.5,0.382,0.181	0.068,0.053,0.07	0.291
ENSG00000160948	VPS28	8	-	145650100	145651155	145650100	145650202	145650328	145651155	30,26,47	15,4,11	11,15,8	16,27,15	76	38	1.99011e-06	1.02262e-05	0.5,0.765,0.681	0.256,0.217,0.211	0.421
ENSG00000198925	ATG9A	2	-	220092491	220092775	220092491	220092535	220092643	220092775	8,19,20	13,15,11	4,2,6	28,26,23	76	38	2.05875e-06	1.05574e-05	0.235,0.388,0.476	0.067,0.037,0.115	0.293
ENSG00000155463	OXA1L	14	+	23239401	23239834	23239401	23239487	23239669	23239834	44,49,53	5,8,10	19,21,22	21,13,13	76	38	2.17889e-06	1.11508e-05	0.815,0.754,0.726	0.311,0.447,0.458	0.36
ENSG00000012171	SEMA3B	3	+	50311343	50312013	50311343	50311488	50311793	50312013	82,67,113	21,16,15	80,118,93	45,65,53	76	38	2.21786e-06	1.13272e-05	0.661,0.677,0.79	0.471,0.476,0.467	0.238
ENSG00000129347	KRI1	19	-	10672342	10672521	10672342	10672392	10672466	10672521	2,4,2	12,28,24	2,0,0	156148132	76	38	2.556e-06	1.30278e-05	0.077,0.067,0.04	0.006,0.0,0.0	0.059
ENSG00000184661	CDCA2	8	+	25317755	25318070	25317755	25317816	25317899	25318070	8,8,7	0,1,2	12,4,11	26,26,22	76	38	2.77112e-06	1.40958e-05	1.0,0.8,0.636	0.188,0.071,0.2	0.659
ENSG00000121073	SLC35B1	17	-	47782485	47783671	47782485	47782643	47783227	47783671	7,16,5	31,40,49	0,3,1	53,64,61	76	38	3.29861e-06	1.67452e-05	0.101,0.167,0.049	0.0,0.023,0.008	0.095
ENSG00000064961	HMG20B	19	+	3576258	3576623	3576258	3576305	3576550	3576623	26,48,44	8,3,15	8,27,12	26,27,15	76	38	4.31532e-06	2.18626e-05	0.619,0.889,0.595	0.133,0.333,0.286	0.45
ENSG00000173020	ADRBK1	11	+	67049292	67050013	67049292	67049423	67049741	67050013	10,7,15	13,21,24	5,5,4	48,47,44	76	38	4.40471e-06	2.22707e-05	0.278,0.143,0.238	0.05,0.051,0.043	0.172
ENSG00000175061	C17orf76-AS1	17	+	16342640	16343567	16342640	16342728	16343498	16343567	272321418	100104132	258271205	149157120	76	38	4.54136e-06	2.29157e-05	0.576,0.607,0.613	0.464,0.463,0.461	0.136
ENSG00000213523	SRA1	5	-	139930645	139931769	139930645	139930754	139931566	139931769	4,9,12	8,10,8	7,4,7	51,26,49	76	38	4.83298e-06	2.43385e-05	0.2,0.31,0.429	0.064,0.071,0.067	0.246
ENSG00000174996	KLC2	11	+	66033903	66035330	66033903	66033961	66034343	66035330	11,15,19	5,2,3	5,4,5	9,19,9	76	38	4.90933e-06	2.46738e-05	0.524,0.789,0.76	0.217,0.095,0.217	0.515
ENSG00000214021	TTLL3	3	+	9859328	9862425	9859328	9860604	9862229	9862425	1,0,0	5,11,9	14,22,21	12,10,13	76	38	5.27752e-06	2.64716e-05	0.091,0.0,0.0	0.368,0.524,0.447	-0.416
ENSG00000185324	CDK10	16	+	89759681	89760640	89759681	89759875	89760580	89760640	32,23,35	3,0,3	37,60,46	30,21,26	76	38	5.7509e-06	2.87887e-05	0.842,1.0,0.854	0.381,0.588,0.469	0.419
ENSG00000138750	NUP54	4	-	77038816	77039347	77038816	77038927	77039227	77039347	1,5,3	1,0,1	0,4,3	57,32,33	76	38	5.83525e-06	2.91531e-05	0.333,1.0,0.6	0.0,0.059,0.043	0.61
ENSG00000165792	METTL17	14	+	21461276	21462222	21461276	21461350	21462127	21462222	27,26,30	14,19,16	19,35,32	51,59,45	76	38	5.93717e-06	2.96037e-05	0.491,0.406,0.484	0.157,0.229,0.262	0.244
ENSG00000161179	YDJC	22	-	21983298	21983696	21983298	21983476	21983596	21983696	44,53,43	0,1,1	10,12,10	3,5,3	76	38	6.22856e-06	3.09954e-05	1.0,0.964,0.956	0.625,0.545,0.625	0.375
ENSG00000185963	BICD2	9	-	95473644	95477745	95473644	95475743	95477534	95477745	7,11,15	1,2,2	2,5,4	8,11,6	76	38	6.56014e-06	3.25812e-05	0.778,0.733,0.789	0.111,0.185,0.25	0.585
ENSG00000166526	ZNF3	7	-	99672757	99673253	99672757	99672884	99673164	99673253	28,53,59	0,0,1	8,5,8	5,1,3	76	38	6.70901e-06	3.32551e-05	1.0,1.0,0.967	0.444,0.714,0.571	0.413
ENSG00000165272	AQP3	9	-	33442849	33443456	33442849	33442968	33443318	33443456	24,16,25	29,45,42	111128118	69,101,69	76	38	6.73976e-06	3.3342e-05	0.293,0.151,0.229	0.446,0.388,0.461	-0.207
ENSG00000120798	NR2C1	12	-	95451506	95452265	95451506	95451654	95452085	95452265	6,8,11	1,0,0	17,24,15	37,19,34	76	38	6.76284e-06	3.33907e-05	0.75,1.0,1.0	0.187,0.387,0.181	0.665
ENSG00000108107	RPL28	19	+	55897937	55899416	55897937	55898061	55899297	55899416	109116129	487502578	48,68,59	464513417	76	38	6.8262e-06	3.36377e-05	0.101,0.104,0.1	0.049,0.062,0.066	0.043
ENSG00000196756	RP4-564F22.2	20	-	37049652	37050888	37049652	37049745	37050738	37050888	244253339	2,1,1	25,42,26	2,5,0	76	38	6.86613e-06	3.37685e-05	0.984,0.992,0.994	0.862,0.808,1.0	0.1
ENSG00000167526	RPL13	16	+	89627634	89628159	89627634	89627776	89627985	89628159	305334397	5,2,7	26,38,26	3,8,0	76	38	7.06597e-06	3.46837e-05	0.968,0.988,0.966	0.813,0.704,1.0	0.135
ENSG00000100906	NFKBIA	14	-	35871599	35872065	35871599	35871740	35871976	35872065	107311381409	0,0,0	121155127	4,2,3	76	38	7.08617e-06	3.47154e-05	1.0,1.0,1.0	0.938,0.975,0.955	0.044
ENSG00000165055	METTL2B	7	+	128116782	128117227	128116782	128116929	128117135	128117227	49,49,31	0,2,0	5,7,5	3,2,4	76	38	7.3573e-06	3.59738e-05	1.0,0.925,1.0	0.455,0.636,0.385	0.483
ENSG00000123374	CDK2	12	+	56360614	56361718	56360614	56360908	56361640	56361718	35,37,31	10,17,17	15,2,11	25,19,16	76	38	7.47552e-06	3.64811e-05	0.636,0.521,0.477	0.231,0.05,0.256	0.366
ENSG00000087088	BAX	19	+	49458804	49459090	49458804	49458856	49458943	49459090	54,44,75	7,11,4	40,53,35	21,30,21	76	38	8.47483e-06	4.1278e-05	0.794,0.667,0.904	0.488,0.469,0.455	0.318
ENSG00000169228	RAB24	5	-	176728925	176729497	176728925	176728988	176729128	176729497	8,8,18	1,0,0	6,7,4	10,7,6	76	38	8.59841e-06	4.17992e-05	0.8,1.0,1.0	0.231,0.333,0.25	0.662
ENSG00000142208	AKT1	14	-	105237081	105238789	105237081	105237184	105238701	105238789	8,7,11	32,31,21	4,9,1	68,85,70	76	38	1.01158e-05	4.90811e-05	0.111,0.101,0.208	0.029,0.05,0.007	0.111
ENSG00000108961	RANGRF	17	+	8192820	8193409	8192820	8192906	8193130	8193409	4,9,7	11,13,14	81,64,54	19,16,34	76	38	1.10898e-05	5.37034e-05	0.154,0.257,0.2	0.681,0.667,0.443	-0.393
ENSG00000161638	ITGA5	12	-	54796970	54797563	54796970	54797108	54797408	54797563	3,8,9	4,3,7	1,2,3	15,24,19	76	38	1.13811e-05	5.50085e-05	0.273,0.571,0.391	0.032,0.04,0.073	0.363
ENSG00000170581	STAT2	12	-	56748561	56749135	56748561	56748647	56749059	56749135	9,10,16	1,1,1	32,39,42	38,32,31	76	38	1.154e-05	5.56701e-05	0.818,0.833,0.889	0.296,0.379,0.404	0.487
ENSG00000099917	MED15	22	+	20939141	20939554	20939141	20939302	20939387	20939554	4,9,11	0,4,2	1,4,2	18,14,9	76	38	1.32218e-05	6.36613e-05	1.0,0.529,0.733	0.027,0.125,0.1	0.67
ENSG00000067829	IDH3G	X	-	153051220	153051727	153051220	153051428	153051666	153051727	35,46,47	30,22,31	15,28,19	45,37,42	76	38	1.32542e-05	6.36961e-05	0.368,0.511,0.431	0.143,0.275,0.184	0.236
ENSG00000005955	GGNBP2	17	+	34934412	34935849	34934412	34934616	34935674	34935849	4,3,6	4,5,3	10,4,7	38,64,56	76	38	1.43526e-05	6.88436e-05	0.333,0.231,0.5	0.116,0.03,0.059	0.286
ENSG00000213780	GTF2H4	6	+	30879460	30879923	30879460	30879544	30879790	30879923	19,15,22	7,5,9	26,31,25	40,38,32	76	38	1.87858e-05	8.99365e-05	0.576,0.6,0.55	0.245,0.29,0.281	0.303
ENSG00000178035	IMPDH2	3	-	49061927	49062235	49061927	49062011	49062091	49062235	33,41,42	188261257	32,43,21	452376371	76	38	1.93985e-05	9.2694e-05	0.081,0.073,0.076	0.034,0.054,0.028	0.038
ENSG00000110497	AMBRA1	11	-	46563494	46564948	46563494	46564531	46564801	46564948	4,6,9	2,4,1	6,9,6	32,25,36	76	38	2.03631e-05	9.71193e-05	0.5,0.429,0.818	0.086,0.153,0.077	0.477
ENSG00000068438	FTSJ1	X	+	48340984	48341415	48340984	48341182	48341373	48341415	72,68,69	4,6,11	47,67,73	17,26,23	74	36	2.09953e-05	9.99456e-05	0.898,0.846,0.753	0.574,0.556,0.607	0.253
ENSG00000197355	UAP1L1	9	+	139976449	139978990	139976449	139976516	139977088	139978990	3,6,8	0,0,1	2,5,2	7,8,12	76	38	2.11279e-05	0.000100387	1.0,1.0,0.8	0.125,0.238,0.077	0.787
ENSG00000162909	CAPN2	1	+	223957542	223958227	223957542	223957611	223958148	223958227	1,1,0	118131136	8,5,20	182124147	76	38	2.16633e-05	0.000102738	0.004,0.004,0.0	0.022,0.02,0.064	-0.033
ENSG00000173020	ADRBK1	11	+	67052317	67052659	67052317	67052454	67052545	67052659	11,13,17	37,43,35	13,6,8	59,94,98	76	38	2.34614e-05	0.000111056	0.129,0.131,0.195	0.099,0.031,0.039	0.095
ENSG00000177666	PNPLA2	11	+	823693	824130	823693	823855	823997	824130	16,15,17	14,9,13	7,8,0	19,25,15	76	38	2.42801e-05	0.000114717	0.364,0.455,0.395	0.156,0.138,0.0	0.307
ENSG00000167700	MFSD3	8	+	145735980	145736286	145735980	145736105	145736176	145736286	20,24,45	3,5,9	20,28,11	14,21,15	76	38	2.54004e-05	0.000119785	0.769,0.706,0.714	0.417,0.4,0.268	0.368
ENSG00000104805	NUCB1	19	+	49422286	49422543	49422286	49422379	49422450	49422543	0,0,2	71,93,87	5,11,15	108,107,77	76	38	2.56404e-05	0.000120692	0.0,0.0,0.011	0.023,0.049,0.089	-0.05
ENSG00000196547	MAN2A2	15	+	91461423	91461985	91461423	91461618	91461874	91461985	3,2,9	5,5,10	2,3,3	23,29,44	76	38	2.65085e-05	0.000124546	0.231,0.167,0.31	0.042,0.049,0.033	0.195
ENSG00000196655	TRAPPC4	11	+	118889475	118890027	118889475	118889680	118889852	118890027	2,0,9	1,5,3	2,1,0	36,33,55	76	38	2.97558e-05	0.000139543	0.5,0.0,0.6	0.027,0.015,0.0	0.353
ENSG00000206560	ANKRD28	3	-	15727508	15727816	15727508	15727626	15727728	15727816	8,5,3	8,24,13	2,4,6	58,73,86	76	38	3.19103e-05	0.000149368	0.333,0.094,0.103	0.017,0.027,0.034	0.151
ENSG00000102317	RBM3	X	+	48433948	48434807	48433948	48434471	48434701	48434807	484549564	2,0,2	199228190	4,8,2	76	38	3.20715e-05	0.000149845	0.992,1.0,0.993	0.961,0.934,0.979	0.037
ENSG00000095015	MAP3K1	5	+	56183204	56184184	56183204	56183347	56184052	56184184	4,12,8	1,0,2	1,4,2	11,11,4	76	38	3.37374e-05	0.000157337	0.667,1.0,0.667	0.043,0.154,0.2	0.646
ENSG00000197102	DYNC1H1	14	+	102515776	102516219	102515776	102515919	102516050	102516219	12,8,9	20,20,34	5,7,7	73,67,54	76	38	3.61174e-05	0.000168126	0.231,0.167,0.117	0.033,0.05,0.061	0.124
ENSG00000103335	PIEZO1	16	-	88786476	88786940	88786476	88786691	88786792	88786940	26,24,27	54,49,61	17,26,27	83144124	76	38	3.67524e-05	0.000170767	0.194,0.197,0.181	0.093,0.083,0.098	0.099
ENSG00000213983	AP1G2	14	-	24032792	24033065	24032792	24032847	24032924	24033065	9,9,10	15,24,14	8,9,5	51,59,55	76	38	3.77644e-05	0.000175146	0.231,0.158,0.263	0.073,0.071,0.043	0.155
ENSG00000102103	PQBP1	X	+	48759509	48760072	48759509	48759794	48760008	48760072	22,30,30	12,8,19	33,51,28	54,62,59	76	38	3.84529e-05	0.000178012	0.478,0.652,0.441	0.234,0.291,0.192	0.285
ENSG00000071462	WBSCR22	7	+	73106925	73107744	73106925	73106976	73107658	73107744	13,21,15	105,79,86	11,1,5	116104102	76	38	4.27624e-05	0.0001976	0.058,0.117,0.08	0.045,0.005,0.024	0.06
ENSG00000166140	ZFYVE19	15	+	41102049	41102414	41102049	41102168	41102268	41102414	18,8,13	7,6,6	32,42,32	71,62,62	76	38	4.29339e-05	0.000197978	0.563,0.4,0.52	0.184,0.253,0.205	0.28
ENSG00000142910	TINAGL1	1	+	32051040	32052356	32051040	32051477	32052310	32052356	9,26,22	19,13,12	3,4,6	19,22,29	76	38	4.30012e-05	0.000197978	0.191,0.5,0.478	0.073,0.083,0.094	0.306
ENSG00000106009	BRAT1	7	-	2581753	2583596	2581753	2581845	2582837	2583596	17,8,11	13,14,17	16,28,14	63,95,87	76	38	4.38888e-05	0.000201697	0.395,0.222,0.244	0.113,0.128,0.074	0.182
ENSG00000137312	FLOT1	6	-	30708966	30709481	30708966	30709110	30709390	30709481	14,24,45	14,20,27	17,22,14	44,39,33	76	38	4.59519e-05	0.000210794	0.333,0.375,0.455	0.162,0.22,0.175	0.202
ENSG00000165819	METTL3	14	-	21971315	21971972	21971315	21971720	21971806	21971972	3,6,10	3,12,12	7,11,9	51,56,65	76	38	4.63708e-05	0.000212329	0.333,0.2,0.294	0.064,0.089,0.065	0.203
ENSG00000159352	PSMD4	1	+	151238479	151238915	151238479	151238597	151238783	151238915	12,11,11	9,10,10	3,3,3	12,20,16	76	38	4.8466e-05	0.000221521	0.4,0.355,0.355	0.111,0.07,0.086	0.281
ENSG00000119688	ABCD4	14	-	74763035	74764772	74763035	74763152	74764632	74764772	17,14,17	3,3,1	12,29,13	12,21,22	76	38	4.98728e-05	0.000227539	0.739,0.7,0.895	0.333,0.408,0.228	0.455
ENSG00000115211	EIF2B4	2	-	27592280	27592786	27592280	27592416	27592742	27592786	17,14,32	2,4,1	9,10,12	10,10,11	76	38	5.23807e-05	0.000238549	0.81,0.636,0.941	0.31,0.333,0.353	0.464
ENSG00000132424	PNISR	6	-	99851704	99852578	99851704	99851758	99852478	99852578	24,31,27	0,0,2	117,98,124	24,39,42	76	38	5.44766e-05	0.000247648	1.0,1.0,0.871	0.709,0.557,0.596	0.336
ENSG00000076108	BAZ2A	12	-	56998368	56999111	56998368	56998583	56998856	56999111	27,30,38	2,4,6	15,13,16	7,8,17	76	38	5.56664e-05	0.000252601	0.871,0.789,0.76	0.517,0.448,0.32	0.378
ENSG00000135476	ESPL1	12	+	53682321	53683087	53682321	53682483	53682873	53683087	10,3,3	2,1,1	12,9,9	23,24,23	76	38	5.71024e-05	0.000258652	0.714,0.6,0.6	0.207,0.158,0.164	0.462
ENSG00000168818	STX18	4	-	4458917	4459227	4458917	4458984	4459149	4459227	3,0,3	2,1,2	0,0,0	21,27,13	76	38	5.99533e-05	0.000271079	0.429,0.0,0.429	0.0,0.0,0.0	0.286
ENSG00000145916	RMND5B	5	+	177570627	177571109	177570627	177570728	177570942	177571109	26,27,36	0,4,0	3,14,7	5,7,4	76	38	6.02654e-05	0.000272003	1.0,0.771,1.0	0.231,0.5,0.467	0.524
ENSG00000071655	MBD3	19	-	1576677	1578537	1576677	1578157	1578333	1578537	10,11,8	3,2,6	14,17,11	31,45,27	76	38	6.19483e-05	0.000279099	0.625,0.733,0.4	0.184,0.159,0.169	0.415
ENSG00000204394	VARS	6	-	31750306	31750622	31750306	31750410	31750497	31750622	28,25,35	18,28,19	13,14,11	40,28,24	76	38	6.46328e-05	0.000290488	0.438,0.309,0.479	0.14,0.2,0.186	0.233
ENSG00000177082	WDR73	15	-	85188701	85189579	85188701	85189067	85189414	85189579	8,13,12	0,2,0	10,14,10	15,9,14	76	38	6.47063e-05	0.000290488	1.0,0.765,1.0	0.25,0.438,0.263	0.605
ENSG00000127054	CPSF3L	1	-	1248414	1248972	1248414	1248504	1248888	1248972	29,31,35	15,9,14	37,33,20	41,38,26	76	38	6.54629e-05	0.000293362	0.492,0.633,0.556	0.311,0.303,0.278	0.263
ENSG00000146918	NCAPG2	7	-	158447809	158448147	158447809	158447950	158448030	158448147	3,2,5	11,21,21	30,30,29	46,25,25	76	38	6.61004e-05	0.000295694	0.12,0.045,0.106	0.246,0.375,0.367	-0.239
ENSG00000070047	PHRF1	11	+	581491	582081	581491	581606	581964	582081	43,59,72	0,0,1	2,10,10	5,1,4	76	38	6.72731e-05	0.000300407	1.0,1.0,0.973	0.167,0.833,0.556	0.472
ENSG00000104517	UBR5	8	-	103269859	103271357	103269859	103269945	103271212	103271357	2,7,4	0,0,1	2,3,3	13,11,8	76	38	6.76601e-05	0.000301601	1.0,1.0,0.667	0.071,0.12,0.158	0.773
ENSG00000213780	GTF2H4	6	+	30880886	30881164	30880886	30880934	30881085	30881164	14,18,19	14,8,14	12,14,19	28,47,39	76	38	7.08759e-05	0.000315379	0.333,0.529,0.404	0.176,0.13,0.196	0.255
ENSG00000100124	ANKRD54	22	-	38228964	38229213	38228964	38229089	38229165	38229213	7,7,7	2,1,0	4,6,6	12,11,15	76	38	7.25649e-05	0.000322326	0.636,0.778,1.0	0.143,0.214,0.167	0.63
ENSG00000143624	INTS3	1	+	153744815	153745187	153744815	153744916	153745114	153745187	16,17,17	13,14,12	21,39,29	73,58,68	76	38	7.28876e-05	0.000323191	0.381,0.378,0.415	0.126,0.252,0.176	0.207
ENSG00000197150	ABCB8	7	+	150731359	150731686	150731359	150731515	150731591	150731686	2,2,1	12,7,7	20,19,15	10,11,11	76	38	7.96091e-05	0.000352375	0.077,0.125,0.067	0.5,0.463,0.405	-0.366
ENSG00000148719	DNAJB12	10	-	74092587	74095689	74092587	74094375	74095537	74095689	4,7,10	4,3,6	5,7,12	16,35,34	76	38	8.22096e-05	0.000363249	0.333,0.538,0.455	0.135,0.091,0.15	0.317
ENSG00000114388	NPRL2	3	-	50385189	50385672	50385189	50385332	50385554	50385672	21,30,29	4,3,1	14,13,14	9,8,10	76	38	8.58506e-05	0.000378012	0.724,0.833,0.935	0.438,0.448,0.412	0.398
ENSG00000000971	CFH	1	+	196709748	196711181	196709748	196709922	196711004	196711181	0,0,0	28,20,44	7,7,8	28,37,32	76	38	8.57458e-05	0.000378012	0.0,0.0,0.0	0.111,0.086,0.111	-0.103
ENSG00000086504	MRPL28	16	-	418500	420225	418500	419220	419930	420225	2,6,3	52,64,48	0,0,0	152161129	76	38	8.98887e-05	0.000394416	0.019,0.045,0.03	0.0,0.0,0.0	0.031
ENSG00000256872	NOL12	22	+	38087180	38089483	38087180	38087431	38089338	38089483	36,40,54	2,1,1	14,25,23	9,5,6	76	38	8.98114e-05	0.000394416	0.9,0.952,0.964	0.438,0.714,0.657	0.336
ENSG00000003756	RBM5	3	+	50137964	50140599	50137964	50138038	50140515	50140599	36,34,53	2,1,1	42,39,25	10,12,5	76	38	9.96443e-05	0.000436463	0.9,0.944,0.964	0.677,0.619,0.714	0.266
ENSG00000143442	POGZ	1	-	151379082	151379499	151379082	151379107	151379386	151379499	49,50,44	2,5,1	11,6,18	4,11,5	57	19	9.99071e-05	0.000436856	0.891,0.769,0.936	0.478,0.154,0.545	0.473
ENSG00000185627	PSMD13	11	+	244040	244469	244040	244216	244425	244469	11,13,22	18,18,18	10,12,4	38,35,37	76	38	0.000103053	0.000449834	0.234,0.265,0.379	0.116,0.146,0.051	0.188
ENSG00000160948	VPS28	8	-	145650328	145651155	145650328	145650434	145651065	145651155	28,30,34	7,14,10	16,26,19	22,26,19	76	38	0.000103946	0.000452165	0.667,0.517,0.63	0.267,0.333,0.333	0.294
ENSG00000182199	SHMT2	12	+	57625993	57626358	57625993	57626075	57626207	57626358	75,82,148	0,0,0	14,8,6	1,1,1	76	38	0.000103864	0.000452165	1.0,1.0,1.0	0.875,0.8,0.75	0.192
ENSG00000164828	SUN1	7	+	892245	892589	892245	892304	892446	892589	18,19,25	10,11,7	34,25,18	45,36,36	76	38	0.000107503	0.000466832	0.474,0.463,0.641	0.274,0.258,0.2	0.282
ENSG00000115282	TTC31	2	+	74717782	74718311	74717782	74717866	74718254	74718311	5,6,7	1,4,3	16,17,22	59,51,42	76	38	0.000109944	0.000476613	0.714,0.429,0.538	0.119,0.143,0.208	0.404
ENSG00000160948	VPS28	8	-	145651408	145651591	145651408	145651446	145651562	145651591	5,14,13	7,17,4	1,5,2	28,15,14	55	17	0.000110983	0.000480293	0.181,0.203,0.501	0.011,0.093,0.042	0.246
ENSG00000180879	SSR4	X	+	153063525	153063948	153063525	153063591	153063783	153063948	10,20,16	37,42,43	4,1,7	46,49,33	76	38	0.000111476	0.000481336	0.119,0.192,0.157	0.042,0.01,0.096	0.107
ENSG00000198736	MSRB1	16	-	1990778	1991406	1990778	1990893	1991257	1991406	3,3,7	2,0,2	1,0,0	6,13,11	76	38	0.000111606	0.000481336	0.429,1.0,0.636	0.077,0.0,0.0	0.663
ENSG00000117410	ATP6V0B	1	+	44442697	44443967	44442697	44442888	44443652	44443967	17,29,34	115123176	15,17,13	201172164	76	38	0.000114706	0.000493863	0.069,0.105,0.088	0.036,0.047,0.038	0.047
ENSG00000161996	WDR90	16	+	705057	705468	705057	705147	705306	705468	9,7,10	1,1,0	3,6,4	8,7,6	76	38	0.000119009	0.000511515	0.818,0.778,1.0	0.158,0.3,0.25	0.629
ENSG00000167110	GOLGA2	9	-	131024841	131025371	131024841	131024983	131025312	131025371	1,3,3	11,5,9	3,5,2	80,79,85	76	38	0.000119337	0.000512054	0.043,0.231,0.143	0.018,0.031,0.012	0.119
ENSG00000068438	FTSJ1	X	+	48336348	48336906	48336348	48336556	48336836	48336906	8,17,26	8,7,11	6,14,11	27,24,22	76	38	0.000127673	0.000546891	0.333,0.548,0.542	0.1,0.226,0.2	0.299
ENSG00000172732	MUS81	11	+	65633281	65633910	65633281	65633365	65633456	65633910	54,62,87	0,0,0	35,28,21	2,4,4	76	38	0.000143436	0.000613369	1.0,1.0,1.0	0.897,0.778,0.724	0.2
ENSG00000172053	QARS	3	-	49137193	49137524	49137193	49137286	49137393	49137524	5,7,11	132,132,98	2,3,0	135178191	76	38	0.000144742	0.000617908	0.019,0.026,0.053	0.007,0.008,0.0	0.028
ENSG00000126107	HECTD3	1	-	45471465	45471788	45471465	45471555	45471668	45471788	4,5,11	2,1,4	2,1,0	7,9,5	76	38	0.000150192	0.000639013	0.5,0.714,0.579	0.125,0.053,0.0	0.538
ENSG00000141295	SCRN2	17	-	45915048	45915816	45915048	45915368	45915635	45915816	7,6,3	8,8,7	51,67,39	19,17,13	76	38	0.000150132	0.000639013	0.304,0.273,0.176	0.573,0.663,0.6	-0.361
ENSG00000111300	NAA25	12	-	112477032	112478382	112477032	112477143	112478284	112478382	3,2,13	2,1,2	2,1,3	15,17,4	76	38	0.000153591	0.000652372	0.429,0.5,0.765	0.063,0.029,0.273	0.443
ENSG00000112146	FBXO9	6	+	52957531	52958359	52957531	52957622	52958263	52958359	4,12,6	2,2,4	14,19,9	35,33,39	76	38	0.000165433	0.000701493	0.5,0.75,0.429	0.167,0.224,0.103	0.395
ENSG00000198755	RPL10A	6	+	35436196	35436650	35436196	35436216	35436575	35436650	49,66,76	4,4,7	12,20,18	4,16,4	52	14	0.000166715	0.000705743	0.767,0.816,0.745	0.447,0.252,0.548	0.36
ENSG00000160072	ATAD3B	1	+	1421161	1421615	1421161	1421218	1421489	1421615	38,24,51	1,4,10	6,6,5	3,8,6	76	38	0.000184403	0.000779313	0.95,0.75,0.718	0.5,0.273,0.294	0.45
ENSG00000012171	SEMA3B	3	+	50312442	50312890	50312442	50312484	50312732	50312890	41,47,49	15,21,19	51,52,25	38,48,43	74	36	0.00018573	0.000783609	0.571,0.521,0.556	0.395,0.345,0.22	0.229
ENSG00000126226	PCID2	13	-	113831930	113832601	113831930	113832290	113832487	113832601	55,43,89	2,3,6	73,81,70	10,24,21	76	38	0.000189245	0.000797103	0.932,0.878,0.881	0.785,0.628,0.625	0.218
ENSG00000161996	WDR90	16	+	716454	716792	716454	716598	716672	716792	18,21,39	7,2,4	14,24,14	10,23,14	76	38	0.000192945	0.000811335	0.563,0.84,0.83	0.412,0.343,0.333	0.382
ENSG00000076706	MCAM	11	-	119183479	119185286	119183479	119183659	119185198	119185286	5,13,14	9,5,9	4,2,2	17,15,16	76	38	0.000204689	0.000859286	0.217,0.565,0.438	0.105,0.063,0.059	0.331
ENSG00000143379	SETDB1	1	+	150935449	150936217	150935449	150935615	150936005	150936217	3,3,2	1,3,1	9,18,17	73,67,62	76	38	0.000213573	0.000895089	0.6,0.333,0.5	0.058,0.118,0.121	0.379
ENSG00000156531	PHF6	X	+	133559230	133562819	133559230	133559360	133559690	133562819	56,99,65	12,11,12	164128131	67,57,40	76	38	0.000216647	0.000906469	0.7,0.818,0.73	0.55,0.529,0.621	0.183
ENSG00000100395	L3MBTL2	22	+	41613126	41615540	41613126	41613206	41615422	41615540	6,0,1	6,5,6	2,1,0	32,42,48	76	38	0.000219102	0.0009122	0.333,0.0,0.077	0.03,0.012,0.0	0.123
ENSG00000186635	ARAP1	11	-	72406586	72406910	72406586	72406673	72406762	72406910	4,1,3	11,3,11	6,2,1	67,70,38	76	38	0.000219066	0.0009122	0.154,0.143,0.12	0.043,0.014,0.013	0.116
ENSG00000141959	PFKL	21	+	45739233	45741758	45739233	45740030	45741611	45741758	4,2,6	33,44,46	21,11,21	53,46,46	76	38	0.000218967	0.0009122	0.057,0.022,0.061	0.165,0.107,0.186	-0.106
ENSG00000041357	PSMA4	15	+	78834518	78834987	78834518	78834561	78834824	78834987	28,47,20	258255313	17,34,25	359487448	75	37	0.000219814	0.000913657	0.051,0.083,0.031	0.023,0.033,0.027	0.027
ENSG00000197037	ZNF498	7	+	99217183	99219197	99217183	99217620	99218995	99219197	27,20,32	0,3,1	6,3,5	3,2,5	76	38	0.000222028	0.000921341	1.0,0.769,0.941	0.5,0.429,0.333	0.483
ENSG00000175224	ATG13	11	+	46690048	46690460	46690048	46690126	46690343	46690460	3,5,3	12,11,16	1,0,1	39,30,31	76	38	0.000224541	0.000930241	0.111,0.185,0.086	0.013,0.0,0.016	0.118
ENSG00000125520	SLC2A4RG	20	+	62373221	62373583	62373221	62373409	62373482	62373583	14,20,35	6,10,9	15,18,11	30,14,22	76	38	0.00022545	0.000932474	0.538,0.5,0.66	0.2,0.391,0.2	0.302
ENSG00000184584	TMEM173	5	-	138860374	138861289	138860374	138860483	138860743	138861289	13,10,21	2,5,4	8,2,6	11,14,7	76	38	0.000239882	0.000990544	0.765,0.5,0.724	0.267,0.067,0.3	0.452
ENSG00000100242	SUN2	22	-	39146902	39147378	39146902	39147040	39147214	39147378	3,2,2	5,3,1	2,9,2	42,45,42	76	38	0.000241407	0.000995212	0.231,0.25,0.5	0.023,0.091,0.023	0.281
ENSG00000089916	C14orf118	14	+	76639888	76643033	76639888	76639968	76642965	76643033	4,7,6	4,1,3	13,11,14	48,43,46	76	38	0.000243561	0.00100245	0.333,0.778,0.5	0.119,0.113,0.132	0.416
ENSG00000137207	YIPF3	6	-	43480806	43481189	43480806	43480938	43481096	43481189	12,19,22	26,16,30	10,8,6	31,40,39	76	38	0.000245796	0.00101001	0.188,0.373,0.268	0.139,0.091,0.071	0.176
ENSG00000010704	HFE	6	+	26091068	26091817	26091068	26091332	26091541	26091817	0,2,0	3,9,4	10,14,14	7,3,3	76	38	0.000252374	0.00103535	0.0,0.1,0.0	0.417,0.7,0.7	-0.572
ENSG00000071894	CPSF1	8	-	145619448	145619770	145619448	145619515	145619593	145619770	16,16,10	17,20,18	6,10,7	37,32,30	76	38	0.000272722	0.00111701	0.32,0.286,0.217	0.075,0.135,0.104	0.17
ENSG00000204469	PRRC2A	6	+	31604509	31604913	31604509	31604722	31604818	31604913	37,37,38	2,4,12	9,17,9	7,14,6	76	38	0.000273823	0.0011197	0.902,0.822,0.613	0.391,0.378,0.429	0.38
ENSG00000213782	DDX47	12	+	12976136	12977611	12976136	12976253	12977473	12977611	329328327	2,2,1	18,23,23	1,1,1	76	38	0.000302429	0.00123467	0.988,0.988,0.994	0.9,0.92,0.92	0.077
ENSG00000156599	ZDHHC5	11	+	57457502	57457909	57457502	57457675	57457806	57457909	9,9,7	0,1,1	20,14,15	23,13,13	76	38	0.000305613	0.00124565	1.0,0.818,0.778	0.303,0.35,0.366	0.526
ENSG00000144021	CIAO1	2	+	96934194	96935093	96934194	96934396	96935005	96935093	26,14,25	19,19,13	27,39,37	72,70,83	76	38	0.000307781	0.00125247	0.406,0.269,0.49	0.158,0.218,0.182	0.202
ENSG00000159840	ZYX	7	+	143079340	143079778	143079340	143079540	143079685	143079778	12,14,13	14,22,23	7,19,10	64,55,36	76	38	0.000320391	0.00130168	0.3,0.241,0.22	0.052,0.147,0.122	0.147
ENSG00000160753	RUSC1	1	+	155295654	155296923	155295654	155295701	155296370	155296923	4,8,10	7,8,5	5,6,1	22,24,20	76	38	0.000321106	0.00130249	0.222,0.333,0.5	0.102,0.111,0.024	0.273
ENSG00000124177	CHD6	20	-	40125448	40126866	40125448	40126141	40126807	40126866	3,2,4	18,11,10	3,2,2	66,58,61	76	38	0.000323943	0.00131189	0.077,0.083,0.167	0.022,0.017,0.016	0.091
ENSG00000084072	PPIE	1	+	40207566	40208969	40207566	40207593	40208887	40208969	7,4,5	13,24,14	1,3,3	52,37,35	59	21	0.00032628	0.00131924	0.161,0.056,0.113	0.007,0.028,0.03	0.088
ENSG00000089053	ANAPC5	12	-	121764898	121766300	121764898	121765034	121766118	121766300	5,1,8	48,36,46	35,26,24	77,72,96	76	38	0.000329512	0.00133017	0.05,0.014,0.08	0.185,0.153,0.111	-0.102
ENSG00000168397	ATG4B	2	+	242590424	242590750	242590424	242590526	242590678	242590750	14,4,3	4,3,5	3,9,4	21,35,19	76	38	0.000335395	0.00135176	0.636,0.4,0.231	0.067,0.114,0.095	0.33
ENSG00000160949	TONSL	8	-	145657667	145659142	145657667	145657843	145658970	145659142	17,12,11	6,4,4	17,28,13	25,33,15	76	38	0.000350669	0.00141106	0.586,0.6,0.579	0.254,0.298,0.302	0.304
ENSG00000165792	METTL17	14	+	21462958	21463392	21462958	21463060	21463323	21463392	50,62,59	44,57,54	97,86,70	170128108	76	38	0.000354669	0.00142489	0.362,0.352,0.353	0.222,0.251,0.245	0.116
ENSG00000101811	CSTF2	X	+	100092327	100093353	100092327	100092438	100093227	100093353	3,3,5	7,4,8	7,3,3	43,37,34	76	38	0.000357374	0.00143347	0.176,0.273,0.238	0.075,0.039,0.042	0.177
ENSG00000103168	TAF1C	16	-	84215351	84215664	84215351	84215469	84215547	84215664	72,72,88	0,0,0	23,37,53	4,4,2	76	38	0.000382079	0.00153014	1.0,1.0,1.0	0.742,0.822,0.93	0.169
ENSG00000136279	DBNL	7	+	44098030	44098582	44098030	44098079	44098500	44098582	10,15,18	10,16,16	21,19,8	46,49,33	76	38	0.000386924	0.00154708	0.333,0.319,0.36	0.186,0.162,0.108	0.185
ENSG00000100288	CHKB	22	-	51018618	51018845	51018618	51018700	51018786	51018845	8,6,11	1,0,1	21,21,24	23,33,13	76	38	0.000391888	0.00156445	0.8,1.0,0.846	0.313,0.241,0.48	0.537
ENSG00000204348	DOM3Z	6	-	31938382	31938924	31938382	31938602	31938688	31938924	73,98,71	1,2,2	14,23,30	5,7,1	76	38	0.000394958	0.00157422	0.973,0.961,0.947	0.583,0.622,0.938	0.246
ENSG00000144591	GMPPA	2	+	220364842	220366759	220364842	220364940	220366197	220366759	5,6,11	0,0,2	4,4,2	7,5,7	76	38	0.000396383	0.0015774	1.0,1.0,0.733	0.222,0.286,0.125	0.7
ENSG00000158552	ZFAND2B	2	+	220072977	220073208	220072977	220073070	220073147	220073208	13,15,10	4,6,1	18,23,20	30,26,26	76	38	0.000412374	0.00163846	0.619,0.556,0.833	0.231,0.307,0.278	0.397
ENSG00000113194	FAF2	5	+	175920999	175921276	175920999	175921085	175921184	175921276	3,1,2	4,10,10	2,2,0	49,59,43	76	38	0.00043006	0.00170604	0.273,0.048,0.091	0.02,0.017,0.0	0.125
ENSG00000135924	DNAJB2	2	+	220145299	220146493	220145299	220145409	220146439	220146493	7,6,6	0,0,1	7,6,5	7,12,7	76	38	0.00043563	0.00172542	1.0,1.0,0.75	0.333,0.2,0.263	0.651
ENSG00000135655	USP15	12	+	62777620	62778083	62777620	62777779	62777858	62778083	19,16,8	3,9,14	16,9,4	30,42,44	76	38	0.000436667	0.00172682	0.76,0.471,0.222	0.211,0.097,0.043	0.367
ENSG00000008300	CELSR3	3	-	48677106	48678957	48677106	48677992	48678756	48678957	3,4,4	1,1,0	2,1,1	7,11,6	76	38	0.000445394	0.00175857	0.6,0.667,1.0	0.125,0.043,0.077	0.674
ENSG00000011258	MBTD1	17	-	49269613	49270377	49269613	49269641	49270142	49270377	5,5,4	0,1,1	4,2,2	10,11,5	60	22	0.000457532	0.00180368	1.0,0.647,0.595	0.128,0.063,0.128	0.641
ENSG00000147140	NONO	X	+	70517685	70518358	70517685	70517788	70518318	70518358	64,93,76	28,23,22	107,76,70	53,65,56	72	34	0.000516691	0.00203371	0.519,0.656,0.62	0.488,0.356,0.371	0.193
ENSG00000162191	UBXN1	11	-	62444989	62445304	62444989	62445106	62445252	62445304	96113110	27,27,27	66,59,77	54,44,27	76	38	0.000517953	0.00203551	0.64,0.677,0.671	0.379,0.401,0.588	0.207
ENSG00000178038	ALS2CL	3	-	46716055	46717466	46716055	46716229	46717107	46717466	2,1,4	4,3,4	29,39,28	3,8,7	76	38	0.000588296	0.00230835	0.2,0.143,0.333	0.829,0.709,0.667	-0.51
ENSG00000177731	FLII	17	-	18148667	18148974	18148667	18148733	18148868	18148974	11,21,23	133126169	11,12,13	267209168	76	38	0.000590359	0.00231285	0.04,0.077,0.064	0.02,0.028,0.037	0.032
ENSG00000180900	SCRIB	8	-	144874654	144875037	144874654	144874805	144874877	144875037	13,11,12	34,26,33	5,10,8	70,46,55	76	38	0.000597623	0.00233768	0.16,0.175,0.154	0.034,0.098,0.068	0.096
ENSG00000146083	RNF44	5	-	175956731	175957207	175956731	175956819	175957082	175957207	60117110	0,0,0	3,11,5	1,0,0	76	38	0.000604206	0.00235977	1.0,1.0,1.0	0.6,1.0,1.0	0.133
ENSG00000173992	CCS	11	+	66366586	66367107	66366586	66366724	66366929	66367107	6,5,5	16,13,15	40,39,27	36,29,22	76	38	0.000611249	0.00238359	0.158,0.161,0.143	0.357,0.402,0.38	-0.226
ENSG00000178950	GAK	4	-	844723	845762	844723	844872	845537	845762	1,4,9	0,2,2	4,2,2	16,9,14	76	38	0.000613466	0.00238854	1.0,0.5,0.692	0.111,0.1,0.067	0.638
ENSG00000163608	C3orf17	3	-	112731580	112732250	112731580	112731658	112732118	112732250	11,3,7	1,2,1	6,4,1	9,15,7	76	38	0.000623641	0.00242442	0.846,0.429,0.778	0.25,0.118,0.067	0.539
ENSG00000160055	TMEM234	1	-	32681797	32682952	32681797	32682548	32682859	32682952	19,20,13	1,3,1	5,4,8	7,4,4	76	38	0.000642966	0.0024957	0.905,0.769,0.867	0.263,0.333,0.5	0.482
ENSG00000115661	STK16	2	+	220110617	220111598	220110617	220110807	220111378	220111598	24,36,31	0,3,2	3,9,6	15,5,1	76	38	0.000661446	0.00256348	1.0,0.857,0.886	0.091,0.474,0.75	0.476
ENSG00000144591	GMPPA	2	+	220370179	220370483	220370179	220370277	220370436	220370483	13,6,11	10,11,7	3,7,4	16,19,26	76	38	0.000667696	0.00258374	0.394,0.214,0.44	0.086,0.156,0.071	0.245
ENSG00000234741	GAS5	1	-	173833621	173833842	173833621	173833644	173833812	173833842	8509741130	0,0,1	236330263	4,1,1	41	3	0.000705549	0.00272604	1.0,1.0,0.988	0.812,0.96,0.951	0.088
ENSG00000086504	MRPL28	16	-	418500	419220	418500	418635	419067	419220	2,7,13	41,45,40	3,6,5	99,102,80	76	38	0.000721594	0.00278376	0.024,0.072,0.14	0.015,0.029,0.03	0.054
ENSG00000157538	DSCR3	21	-	38595720	38600107	38595720	38597927	38599954	38600107	1,2,3	1,0,2	0,1,2	16,17,22	76	38	0.0007273	0.00280149	0.333,1.0,0.429	0.0,0.029,0.043	0.563
ENSG00000115446	UNC50	2	+	99225041	99226502	99225041	99225189	99226218	99226502	3,5,8	0,2,5	2,5,4	13,21,20	76	38	0.000772397	0.00297067	1.0,0.556,0.444	0.071,0.106,0.091	0.577
ENSG00000105726	ATP13A1	19	-	19758222	19758568	19758222	19758337	19758407	19758568	9,10,15	12,14,8	8,12,8	36,34,30	76	38	0.000788746	0.00302893	0.273,0.263,0.484	0.1,0.15,0.118	0.217
ENSG00000168488	ATXN2L	16	+	28847253	28848558	28847253	28847443	28848048	28848558	57,69,77	0,1,0	27,34,28	3,3,3	76	38	0.000792083	0.00303712	1.0,0.972,1.0	0.818,0.85,0.824	0.16
ENSG00000160753	RUSC1	1	+	155294892	155295281	155294892	155294969	155295106	155295281	11,8,19	4,8,2	7,14,11	29,32,16	76	38	0.000803805	0.00307739	0.579,0.333,0.826	0.108,0.179,0.256	0.398
ENSG00000174233	ADCY6	12	-	49170886	49171304	49170886	49171014	49171192	49171304	1,1,7	6,7,8	1,6,1	35,49,39	76	38	0.00082507	0.00315402	0.077,0.067,0.304	0.014,0.058,0.013	0.121
ENSG00000112514	CUTA	6	-	33384873	33385087	33384873	33384919	33385027	33385087	16,14,21	7,14,21	7,10,2	32,17,12	76	38	0.000846534	0.00323117	0.533,0.333,0.333	0.099,0.227,0.077	0.265
ENSG00000171793	CTPS	1	+	41474330	41474562	41474330	41474386	41474465	41474562	4,9,2	38,18,26	56,62,34	110,83,61	76	38	0.000872919	0.00332685	0.05,0.2,0.037	0.203,0.272,0.218	-0.135
ENSG00000114745	GORASP1	3	-	39142237	39142593	39142237	39142368	39142506	39142593	11,3,13	1,2,0	6,6,1	6,14,12	76	38	0.000888204	0.00338	0.846,0.429,1.0	0.333,0.176,0.04	0.575
ENSG00000099783	HNRNPM	19	+	8530207	8530399	8530207	8530246	8530363	8530399	125118145	25,49,39	182166151	109,92,75	63	25	0.000932988	0.00354507	0.665,0.489,0.596	0.399,0.417,0.444	0.163
ENSG00000100241	SBF1	22	-	50905960	50906352	50905960	50906122	50906214	50906352	6,1,12	4,8,3	0,0,0	13,11,11	76	38	0.000944933	0.00358506	0.429,0.059,0.667	0.0,0.0,0.0	0.385
ENSG00000161202	DVL3	3	+	183882583	183882994	183882583	183882719	183882900	183882994	18,19,33	4,7,6	18,26,34	18,19,24	76	38	0.000963516	0.00365008	0.692,0.576,0.733	0.333,0.406,0.415	0.282
ENSG00000074582	BCS1L	2	+	219526919	219527402	219526919	219526983	219527232	219527402	12,6,22	7,10,15	6,5,3	23,15,13	76	38	0.000989695	0.00374363	0.462,0.231,0.423	0.115,0.143,0.103	0.252
ENSG00000160326	SLC2A6	9	-	136338536	136339210	136338536	136338722	136339101	136339210	5,11,11	1,2,3	8,9,7	6,13,15	76	38	0.001008	0.0038023	0.714,0.733,0.647	0.4,0.257,0.189	0.416
ENSG00000111144	LTA4H	12	-	96402871	96407036	96402871	96402926	96406965	96407036	0,0,0	96115106	10,5,4	123,99,132	76	38	0.00100973	0.0038023	0.0,0.0,0.0	0.039,0.025,0.015	-0.026
ENSG00000119760	SUPT7L	2	-	27883850	27885148	27883850	27884468	27885045	27885148	51,99,60	2,1,0	40,43,42	4,4,6	76	38	0.00100915	0.0038023	0.927,0.98,1.0	0.833,0.843,0.778	0.151
ENSG00000185000	DGAT1	8	-	145540684	145540915	145540684	145540772	145540849	145540915	7,6,12	9,7,12	39,38,22	9,15,8	76	38	0.00103799	0.00389711	0.28,0.3,0.333	0.684,0.559,0.579	-0.303
ENSG00000196839	ADA	20	-	43251469	43251719	43251469	43251571	43251647	43251719	0,1,0	17,23,24	10,10,9	37,30,32	76	38	0.00103724	0.00389711	0.0,0.021,0.0	0.119,0.143,0.123	-0.121
ENSG00000060138	CSDA	12	-	10854558	10856747	10854558	10854733	10856649	10856747	113154142	2,3,2	10,10,11	0,4,1	76	38	0.0010607	0.00397643	0.966,0.963,0.973	1.0,0.556,0.846	0.167
ENSG00000100911	PSME2	14	-	24613608	24614364	24613608	24613677	24614266	24614364	5,2,4	14,16,13	23,33,31	40,19,19	76	38	0.00106783	0.00399722	0.152,0.059,0.133	0.223,0.465,0.449	-0.264
ENSG00000180104	EXOC3	5	+	464404	465387	464404	464527	465225	465387	3,4,4	8,11,16	5,11,3	88,74,54	76	38	0.0010769	0.00402522	0.158,0.154,0.111	0.028,0.069,0.027	0.1
ENSG00000166411	IDH3A	15	+	78449249	78449973	78449249	78449504	78449889	78449973	0,2,2	2,10,1	27,21,19	2,4,4	76	38	0.00111018	0.00414345	0.0,0.091,0.5	0.871,0.724,0.704	-0.569
ENSG00000076706	MCAM	11	-	119185542	119185973	119185542	119185750	119185848	119185973	4,5,7	5,6,4	4,1,3	16,18,12	76	38	0.00113395	0.00422594	0.286,0.294,0.467	0.111,0.027,0.111	0.266
ENSG00000196465	MYL6B	12	+	56548596	56548982	56548596	56548624	56548838	56548982	6,9,6	50,35,62	1,1,2	49,63,58	60	22	0.00114449	0.0042589	0.042,0.086,0.034	0.007,0.006,0.012	0.046
ENSG00000198830	HMGN2	1	+	26799973	26800626	26799973	26800018	26800575	26800626	71,78,64	5,4,2	100142104	1,0,0	76	38	0.00119795	0.00445131	0.877,0.907,0.941	0.98,1.0,1.0	-0.085
ENSG00000160813	PPP1R35	7	-	100033253	100033687	100033253	100033390	100033470	100033687	10,8,14	2,0,0	10,14,4	8,8,10	76	38	0.00126483	0.0046929	0.714,1.0,1.0	0.385,0.467,0.167	0.565
ENSG00000171858	RPS21	20	+	60963364	60963575	60963364	60963420	60963512	60963575	683768827	444848445081	498559549	475341504722	76	38	0.00132808	0.00491311	0.071,0.073,0.075	0.05,0.063,0.055	0.017
ENSG00000081307	UBA5	3	+	132390620	132391021	132390620	132390725	132390893	132391021	3,1,5	6,11,12	4,2,4	49,57,44	76	38	0.00132805	0.00491311	0.2,0.043,0.172	0.039,0.017,0.043	0.105
ENSG00000163214	DHX57	2	-	39081195	39082394	39081195	39081320	39082198	39082394	1,3,5	3,0,1	5,1,1	38,20,19	76	38	0.00135499	0.00500533	0.143,1.0,0.714	0.062,0.024,0.026	0.582
ENSG00000109323	MANBA	4	-	103585841	103590206	103585841	103586009	103590119	103590206	6,3,4	0,0,1	0,1,0	1,4,5	76	38	0.00142245	0.00524686	1.0,1.0,0.667	0.0,0.111,0.0	0.852
ENSG00000102317	RBM3	X	+	48433948	48434471	48433948	48434055	48434309	48434471	111109148	0,1,1	49,47,26	2,3,2	76	38	0.0014395	0.005302	1.0,0.982,0.987	0.925,0.887,0.867	0.097
ENSG00000108641	B9D1	17	-	19246482	19247170	19246482	19246774	19247102	19247170	2,1,1	7,11,9	15,19,20	19,16,18	76	38	0.00147292	0.00541715	0.125,0.043,0.053	0.283,0.373,0.357	-0.264
ENSG00000171109	MFN1	3	+	179096128	179096602	179096128	179096231	179096372	179096602	6,5,6	11,22,11	5,6,4	55,33,48	76	38	0.00150388	0.00551495	0.214,0.102,0.214	0.043,0.083,0.04	0.121
ENSG00000108821	COL1A1	17	-	48276778	48276951	48276778	48276814	48276916	48276951	11,10,18	14,28,19	5,4,8	30,37,19	59	21	0.00150362	0.00551495	0.219,0.113,0.252	0.056,0.037,0.13	0.12
ENSG00000185896	LAMP1	13	+	113974659	113975785	113974659	113974785	113975718	113975785	13,15,16	110136155	6,6,4	131140131	76	38	0.00150621	0.00551549	0.056,0.052,0.049	0.022,0.021,0.015	0.033
ENSG00000166986	MARS	12	+	57905790	57906136	57905790	57905886	57906018	57906136	15,17,15	41,60,51	21,14,2	102,83,82	76	38	0.00155052	0.00566952	0.155,0.124,0.128	0.093,0.078,0.012	0.075
ENSG00000011295	TTC19	17	+	15929853	15932100	15929853	15930016	15930687	15932100	19,19,13	35,37,57	24,16,17	108,94,105	76	38	0.00157482	0.00575001	0.213,0.204,0.102	0.1,0.078,0.075	0.089
ENSG00000164611	PTTG1	5	+	159849308	159849900	159849308	159849410	159849715	159849900	19,14,24	6,15,19	9,6,10	20,20,22	76	38	0.00166693	0.00607757	0.613,0.318,0.387	0.184,0.13,0.185	0.273
ENSG00000164896	FASTK	7	-	150773712	150774114	150773712	150773919	150773999	150774114	7,11,9	2,8,7	14,28,30	57,59,40	76	38	0.00174723	0.00636112	0.636,0.407,0.391	0.109,0.192,0.273	0.287
ENSG00000090581	GNPTG	16	+	1412206	1412743	1412206	1412535	1412611	1412743	19,25,33	17,12,15	15,17,16	23,26,24	76	38	0.00178616	0.00649349	0.358,0.51,0.524	0.246,0.246,0.25	0.217
ENSG00000106077	ABHD11	7	-	73151550	73152065	73151550	73151721	73151891	73152065	12,7,10	5,2,1	3,9,14	14,17,11	76	38	0.00180728	0.00656081	0.545,0.636,0.833	0.097,0.209,0.389	0.44
ENSG00000148824	MTG1	10	+	135215032	135215749	135215032	135215094	135215652	135215749	0,1,0	16,10,13	21,33,12	43,49,46	76	38	0.00181992	0.0065972	0.0,0.048,0.0	0.196,0.252,0.115	-0.172
ENSG00000143499	SMYD2	1	+	214505360	214507651	214505360	214505535	214507542	214507651	2,5,2	28,31,30	17,14,14	31,46,44	76	38	0.00183803	0.00665329	0.034,0.075,0.032	0.215,0.132,0.137	-0.114
ENSG00000243649	CFB	6	+	31918062	31918549	31918062	31918180	31918395	31918549	16,15,30	17,23,25	9,8,9	34,20,22	76	38	0.00185569	0.00670761	0.32,0.246,0.375	0.117,0.167,0.17	0.162
ENSG00000119688	ABCD4	14	-	74759450	74759951	74759450	74759572	74759856	74759951	11,15,11	0,1,0	19,15,15	9,14,4	76	38	0.00193696	0.00698134	1.0,0.882,1.0	0.514,0.349,0.652	0.456
ENSG00000145833	DDX46	5	+	134146910	134147535	134146910	134147048	134147385	134147535	6,7,7	89,97,109	3,4,3	199148167	76	38	0.00193447	0.00698134	0.033,0.035,0.031	0.007,0.013,0.009	0.023
ENSG00000164062	APEH	3	+	49713488	49713948	49713488	49713652	49713810	49713948	17,40,31	245321228	28,33,21	422437445	76	38	0.00205142	0.00738334	0.034,0.059,0.064	0.032,0.036,0.023	0.022
ENSG00000136718	IMP4	2	+	131100466	131100767	131100466	131100508	131100658	131100767	42,36,40	1,0,0	1,9,12	2,4,1	74	36	0.00210747	0.00757427	0.953,1.0,1.0	0.196,0.523,0.854	0.46
ENSG00000172269	DPAGT1	11	-	118971727	118972570	118971727	118971848	118972204	118972570	6,17,12	8,16,9	10,13,5	28,30,19	76	38	0.00216491	0.00776967	0.273,0.347,0.4	0.152,0.178,0.116	0.191
ENSG00000185246	PRPF39	14	+	45565305	45566208	45565305	45565431	45566089	45566208	6,4,3	4,6,6	40,45,29	8,12,10	76	38	0.00219582	0.00786939	0.429,0.25,0.2	0.714,0.652,0.592	-0.36
ENSG00000111203	ITFG2	12	+	2926388	2927116	2926388	2926484	2927074	2927116	2,0,3	5,5,9	0,2,1	30,41,27	74	36	0.00223494	0.00798689	0.163,0.0,0.14	0.0,0.023,0.018	0.087
ENSG00000243649	CFB	6	+	31919331	31919861	31919331	31919381	31919651	31919861	18,24,32	12,12,15	7,6,6	10,17,7	76	38	0.00223484	0.00798689	0.429,0.5,0.516	0.259,0.15,0.3	0.245
ENSG00000171703	TCEA2	20	+	62701117	62701767	62701117	62701174	62701612	62701767	3,7,11	7,14,7	50,86,61	26,19,22	76	38	0.00228586	0.00815732	0.176,0.2,0.44	0.49,0.694,0.581	-0.316
ENSG00000120314	WDR55	5	+	140048475	140048833	140048475	140048575	140048663	140048833	15,22,11	0,1,4	12,15,9	7,14,8	76	38	0.00231653	0.00825508	1.0,0.917,0.579	0.462,0.349,0.36	0.442
ENSG00000163930	BAP1	3	-	52440268	52440923	52440268	52440338	52440844	52440923	58,67,70	2,1,2	28,33,34	5,5,3	76	38	0.00234186	0.00833357	0.935,0.971,0.946	0.737,0.767,0.85	0.166
ENSG00000197114	ZGPAT	20	+	62364938	62366176	62364938	62365091	62366056	62366176	6,11,13	1,0,0	7,15,23	12,16,7	76	38	0.00235649	0.00837384	0.75,1.0,1.0	0.226,0.319,0.622	0.528
ENSG00000197530	MIB2	1	+	1563652	1564102	1563652	1563779	1563868	1564102	10,12,17	6,7,0	9,14,8	20,26,20	76	38	0.00243437	0.00863841	0.455,0.462,1.0	0.184,0.212,0.167	0.451
ENSG00000092010	PSME1	14	+	24607257	24607472	24607257	24607326	24607404	24607472	4,2,4	21,35,35	7,9,22	28,33,23	76	38	0.00246147	0.00871842	0.087,0.028,0.054	0.111,0.12,0.324	-0.129
ENSG00000105821	DNAJC2	7	-	102962957	102963241	102962957	102963079	102963149	102963241	27,24,32	9,11,3	61,90,64	69,64,48	76	38	0.00246383	0.00871842	0.6,0.522,0.842	0.307,0.413,0.4	0.281
ENSG00000113758	DBN1	5	-	176894481	176894818	176894481	176894628	176894743	176894818	3,1,2	5,7,7	0,1,1	25,22,25	76	38	0.00247122	0.00873234	0.231,0.067,0.125	0.0,0.022,0.02	0.127
ENSG00000177082	WDR73	15	-	85188701	85189579	85188701	85189067	85189203	85189579	15,19,18	0,1,0	25,35,23	4,13,12	76	38	0.00252046	0.00889387	1.0,0.905,1.0	0.758,0.574,0.489	0.361
ENSG00000198467	TPM2	9	-	35684484	35685136	35684484	35684547	35685060	35685136	27,25,35	108167120	24,36,19	207198224	76	38	0.00255164	0.00899134	0.111,0.07,0.127	0.055,0.083,0.041	0.043
ENSG00000131591	C1orf159	1	-	1019732	1019886	1019732	1019763	1019860	1019886	5,3,6	0,1,0	3,7,5	7,12,11	45	7	0.00255933	0.00900583	1.0,0.318,1.0	0.063,0.083,0.066	0.702
ENSG00000013573	DDX11	12	+	31242336	31243028	31242336	31242424	31242819	31243028	8,22,9	0,3,3	28,27,33	31,29,20	76	38	0.00256954	0.00902919	1.0,0.786,0.6	0.311,0.318,0.452	0.435
ENSG00000135297	MTO1	6	+	74189454	74189849	74189454	74189567	74189658	74189849	2,4,3	3,6,1	3,3,2	27,21,13	76	38	0.00261827	0.0091876	0.25,0.25,0.6	0.053,0.067,0.071	0.303
ENSG00000164934	DCAF13	8	+	104439324	104442917	104439324	104439480	104442839	104442917	7,13,12	23,30,36	7,13,7	51,55,79	76	38	0.00272209	0.00953865	0.132,0.178,0.143	0.064,0.106,0.042	0.08
ENSG00000143322	ABL2	1	-	179076852	179078576	179076852	179078033	179078342	179078576	16,17,18	1,0,0	13,8,15	3,3,7	76	38	0.00284925	0.00997039	0.889,1.0,1.0	0.684,0.571,0.517	0.372
ENSG00000114021	NIT2	3	+	100064428	100065099	100064428	100064522	100065024	100065099	12,14,14	85,94,101	29,39,33	131124106	76	38	0.00301484	0.0105274	0.066,0.069,0.065	0.1,0.136,0.135	-0.057
ENSG00000142541	RPL13A	19	+	49993106	49993554	49993106	49993179	49993488	49993554	155218182366	2,0,0	80108113	1,2,1	76	38	0.00301678	0.0105274	0.997,1.0,1.0	0.976,0.964,0.983	0.025
ENSG00000198837	DENND4B	1	-	153903014	153903540	153903014	153903079	153903167	153903540	7,3,6	0,7,7	3,5,4	27,46,42	76	38	0.0030585	0.0106583	1.0,0.176,0.3	0.053,0.052,0.045	0.442
ENSG00000161996	WDR90	16	+	705772	706537	705772	705889	706301	706537	22,24,33	9,6,5	21,27,30	11,31,21	76	38	0.00309456	0.0107691	0.55,0.667,0.767	0.488,0.303,0.417	0.259
ENSG00000101158	TH1L	20	+	57568052	57568599	57568052	57568167	57568503	57568599	34,26,35	77,72,74	22,23,19	94,89,93	76	38	0.00309898	0.0107696	0.181,0.153,0.191	0.105,0.114,0.093	0.071
ENSG00000100823	APEX1	14	+	20923736	20924260	20923736	20923932	20924072	20924260	136156151	0,0,0	28,22,25	1,1,0	76	38	0.00311505	0.0108106	1.0,1.0,1.0	0.933,0.917,1.0	0.05
ENSG00000166986	MARS	12	+	57883049	57883341	57883049	57883128	57883206	57883341	6,6,11	8,8,14	9,6,7	37,31,18	76	38	0.0031373	0.0108728	0.273,0.273,0.282	0.108,0.088,0.163	0.156
ENSG00000204348	DOM3Z	6	-	31938382	31938924	31938382	31938529	31938688	31938924	77,96,67	0,0,0	20,20,27	2,1,1	76	38	0.00315676	0.0109253	1.0,1.0,1.0	0.833,0.909,0.931	0.109
ENSG00000161981	SNRNP25	16	+	105776	106613	105776	105882	106538	106613	12,8,20	23,25,26	2,6,7	34,28,24	76	38	0.00321937	0.0111267	0.207,0.138,0.278	0.029,0.097,0.127	0.123
ENSG00000160972	PPP1R16A	8	+	145725478	145725774	145725478	145725582	145725649	145725774	6,3,9	0,1,0	5,10,4	10,11,5	76	38	0.00328594	0.0113412	1.0,0.6,1.0	0.2,0.313,0.286	0.6
ENSG00000102125	TAZ	X	+	153647881	153648433	153647881	153647962	153648370	153648433	3,1,1	5,4,4	22,27,18	8,7,10	76	38	0.00331829	0.0114372	0.231,0.111,0.111	0.579,0.659,0.474	-0.42
ENSG00000187147	RNF220	1	+	45115554	45117395	45115554	45115629	45116375	45117395	2,0,4	0,1,1	7,9,7	63,84,63	76	38	0.00332517	0.0114453	1.0,0.0,0.667	0.053,0.051,0.053	0.503
ENSG00000115207	GTF3C2	2	-	27558783	27559292	27558783	27558895	27559064	27559292	1,3,8	7,6,5	3,2,5	24,32,30	76	38	0.00333001	0.0114464	0.067,0.2,0.444	0.059,0.03,0.077	0.182
ENSG00000174483	BBS1	11	+	66283163	66283404	66283163	66283202	66283331	66283404	12,20,21	1,0,1	22,10,13	9,2,7	71	33	0.00338172	0.0116054	0.848,1.0,0.907	0.532,0.699,0.463	0.354
ENSG00000168002	POLR2G	11	+	62529266	62530338	62529266	62529376	62530013	62530338	23,21,20	1,3,1	10,12,8	6,4,4	76	38	0.00338548	0.0116054	0.92,0.778,0.909	0.455,0.6,0.5	0.351
ENSG00000139112	GABARAPL1	12	+	10366434	10366786	10366434	10366573	10366672	10366786	37,35,54	4,3,4	45,49,36	17,13,7	76	38	0.00342462	0.0117236	0.822,0.854,0.871	0.57,0.653,0.72	0.201
ENSG00000137221	TJAP1	6	+	43471360	43474291	43471360	43471444	43472498	43474291	17,17,13	1,0,1	11,12,10	4,8,3	76	38	0.00344948	0.0117927	0.895,1.0,0.867	0.579,0.429,0.625	0.376
ENSG00000149428	HYOU1	11	-	118926204	118926555	118926204	118926283	118926461	118926555	12,23,20	134151140	8,7,13	141148177	76	38	0.00350066	0.0119503	0.043,0.071,0.067	0.028,0.023,0.035	0.032
ENSG00000112787	FBRSL1	12	+	133150904	133151150	133150904	133150934	133151078	133151150	7,5,4	2,1,1	3,3,5	5,8,7	62	24	0.00350505	0.0119503	0.575,0.659,0.608	0.188,0.127,0.217	0.437
ENSG00000125967	NECAB3	20	-	32247690	32248201	32247690	32247809	32248064	32248201	15,20,20	5,5,8	49,65,61	52,56,37	76	38	0.00358251	0.0121979	0.6,0.667,0.556	0.32,0.367,0.452	0.228
ENSG00000204351	SKIV2L	6	+	31928817	31929452	31928817	31928871	31929323	31929452	107106124	1,0,1	20,24,29	1,1,2	76	38	0.00372209	0.0126561	0.982,1.0,0.984	0.909,0.923,0.879	0.085
ENSG00000112739	PRPF4B	6	+	4060646	4061381	4060646	4060920	4061248	4061381	73,107,88	0,1,0	169241178	14,12,6	76	38	0.00372833	0.0126603	1.0,0.982,1.0	0.858,0.909,0.937	0.093
ENSG00000143578	CREB3L4	1	+	153941405	153941931	153941405	153941652	153941809	153941931	11,4,9	2,0,2	17,14,8	14,14,15	76	38	0.00375645	0.0127386	0.733,1.0,0.692	0.378,0.333,0.211	0.501
ENSG00000103051	COG4	16	-	70542308	70543291	70542308	70542367	70543133	70543291	11,11,17	5,4,6	76,71,62	15,7,4	76	38	0.00377621	0.0127884	0.524,0.579,0.586	0.717,0.835,0.886	-0.25
ENSG00000149761	NUDT22	11	+	63993761	63994604	63993761	63993899	63994106	63994604	10,15,18	5,7,6	15,15,23	19,22,21	76	38	0.00380646	0.0128736	0.5,0.517,0.6	0.283,0.254,0.354	0.242
ENSG00000173209	AHSA2	2	+	61412636	61413632	61412636	61412753	61413580	61413632	2,4,5	5,7,4	61,57,39	17,14,20	76	38	0.00390572	0.0131916	0.167,0.222,0.385	0.642,0.671,0.494	-0.344
ENSG00000160688	FLAD1	1	+	154962634	154963004	154962634	154962733	154962814	154963004	5,8,8	0,1,0	15,30,22	19,14,16	76	38	0.00392899	0.0132525	1.0,0.8,1.0	0.283,0.517,0.407	0.531
ENSG00000100075	SLC25A1	22	-	19165239	19165554	19165239	19165378	19165454	19165554	5,8,8	17,25,11	5,2,2	23,38,25	76	38	0.00406295	0.013686	0.128,0.138,0.267	0.098,0.026,0.038	0.124
ENSG00000068354	TBC1D25	X	+	48417284	48417734	48417284	48417412	48417545	48417734	3,4,6	1,1,0	2,2,2	3,8,6	76	38	0.0041093	0.0138237	0.6,0.667,1.0	0.25,0.111,0.143	0.588
ENSG00000164896	FASTK	7	-	150774707	150775179	150774707	150774867	150774965	150775179	17,9,24	14,8,9	57,61,28	58,100,76	76	38	0.00416054	0.013974	0.378,0.36,0.571	0.329,0.234,0.156	0.197
ENSG00000102316	MAGED2	X	+	54841680	54842440	54841680	54842123	54842313	54842440	20,19,21	63,52,47	13,14,13	66,64,89	76	38	0.00417059	0.013974	0.137,0.154,0.183	0.09,0.099,0.068	0.072
ENSG00000149532	CPSF7	11	-	61183137	61183991	61183137	61183256	61183576	61183991	9,10,8	4,1,2	51,30,39	41,53,37	76	38	0.00416701	0.013974	0.529,0.833,0.667	0.383,0.221,0.345	0.36
ENSG00000113240	CLK4	5	-	178043882	178045779	178043882	178043949	178045556	178045779	14,14,28	1,0,0	31,31,26	7,9,7	76	38	0.00423087	0.0141571	0.875,1.0,1.0	0.689,0.633,0.65	0.301
ENSG00000087088	BAX	19	+	49464066	49465055	49464066	49464171	49464788	49465055	18,19,23	3,4,7	26,27,26	19,26,12	76	38	0.00427296	0.014279	0.75,0.704,0.622	0.406,0.342,0.52	0.269
ENSG00000144635	DYNC1LI1	3	-	32611837	32612350	32611837	32611911	32612116	32612350	5,1,4	1,1,5	4,3,2	18,15,14	76	38	0.00429846	0.0143452	0.714,0.333,0.286	0.1,0.091,0.067	0.358
ENSG00000171720	HDAC3	5	-	141007680	141008206	141007680	141007754	141008125	141008206	11,13,10	23,22,22	7,13,11	54,41,48	76	38	0.00433408	0.014445	0.193,0.228,0.185	0.061,0.137,0.103	0.102
ENSG00000149499	EML3	11	-	62370230	62370719	62370230	62370361	62370620	62370719	10,9,8	18,16,15	33,41,20	15,21,23	76	38	0.00440348	0.014657	0.217,0.22,0.211	0.524,0.494,0.303	-0.224
ENSG00000115091	ACTR3	2	+	114709296	114713283	114709296	114709422	114713199	114713283	6,4,9	36,50,46	2,7,6	91,92,108	76	38	0.00446332	0.0148366	0.077,0.038,0.089	0.011,0.037,0.027	0.043
ENSG00000164039	BDH2	4	-	104006505	104007697	104006505	104006619	104007636	104007697	0,1,0	10,19,13	5,6,5	13,18,9	76	38	0.00447929	0.0148701	0.0,0.026,0.0	0.161,0.143,0.217	-0.165
ENSG00000117335	CD46	1	+	207940357	207943707	207940357	207940540	207943665	207943707	30,31,25	91,96,93	75,74,65	358374368	74	36	0.00467952	0.0155144	0.138,0.136,0.116	0.092,0.088,0.079	0.044
ENSG00000104825	NFKBIB	19	+	39398038	39399531	39398038	39398299	39399370	39399531	52,40,69	4,5,8	50,49,42	11,15,12	76	38	0.00483365	0.0160043	0.867,0.8,0.812	0.694,0.62,0.636	0.176
ENSG00000136908	DPM2	9	-	130698831	130699802	130698831	130698934	130699712	130699802	26,53,29	3,5,9	71,73,79	28,44,29	76	38	0.00488936	0.0161676	0.813,0.841,0.617	0.559,0.453,0.577	0.227
ENSG00000178719	GRINA	8	+	145066045	145066541	145066045	145066246	145066412	145066541	20,24,26	4,4,8	4,7,8	6,14,3	76	38	0.00491491	0.0162308	0.714,0.75,0.619	0.25,0.2,0.571	0.354
ENSG00000175455	CCDC14	3	-	123674689	123675642	123674689	123674962	123675586	123675642	8,15,7	0,0,1	85120102	0,0,0	76	38	0.00502574	0.0165751	1.0,1.0,0.778	1.0,1.0,1.0	-0.074
ENSG00000108349	CASC3	17	+	38325850	38328431	38325850	38325915	38326699	38328431	7,5,8	4,8,5	7,10,8	19,25,28	76	38	0.00530688	0.0174794	0.467,0.238,0.444	0.156,0.167,0.125	0.234
ENSG00000060138	CSDA	12	-	10862506	10865932	10862506	10862713	10865809	10865932	17,26,22	135207191	21,24,21	307331311	76	38	0.00536314	0.0176417	0.059,0.059,0.054	0.033,0.035,0.033	0.024
ENSG00000182400	TRAPPC6B	14	-	39627488	39628754	39627488	39627606	39628686	39628754	17,12,6	5,1,3	16,9,13	16,15,13	76	38	0.00546793	0.017963	0.63,0.857,0.5	0.333,0.231,0.333	0.363
ENSG00000115204	MPV17	2	-	27535081	27535456	27535081	27535114	27535360	27535456	0,1,0	48,43,49	7,3,2	36,40,44	65	27	0.00550399	0.018058	0.0,0.01,0.0	0.075,0.03,0.019	-0.038
ENSG00000198755	RPL10A	6	+	35436723	35437306	35436723	35436804	35437157	35437306	320381386	129141160	227296240	130156132	76	38	0.00552612	0.018107	0.554,0.575,0.547	0.466,0.487,0.476	0.082
ENSG00000103852	TTC23	15	-	99758792	99759253	99758792	99758918	99759102	99759253	16,11,5	1,1,5	10,12,4	19,9,20	76	38	0.00555136	0.0181661	0.889,0.846,0.333	0.208,0.4,0.091	0.456
ENSG00000256269	HMBS	11	+	118962834	118963521	118962834	118963233	118963467	118963521	8,9,10	0,1,2	1,11,9	10,5,8	76	38	0.00559032	0.0182699	1.0,0.818,0.714	0.048,0.524,0.36	0.533
ENSG00000100241	SBF1	22	-	50885750	50886038	50885750	50885882	50885950	50886038	5,6,4	22,19,31	4,4,1	47,55,46	76	38	0.0056276	0.018368	0.102,0.136,0.061	0.041,0.035,0.011	0.071
ENSG00000116670	MAD2L2	1	-	11740409	11740670	11740409	11740528	11740618	11740670	2,11,9	13,15,18	3,6,2	29,35,19	76	38	0.00571462	0.0186279	0.071,0.268,0.2	0.049,0.079,0.05	0.12
ENSG00000088986	DYNLL1	12	+	120933915	120934356	120933915	120934019	120934218	120934356	19,20,20	40,66,42	58,41,34	171236159	76	38	0.00576209	0.0187584	0.192,0.132,0.192	0.145,0.08,0.097	0.065
ENSG00000141499	WRAP53	17	+	7591794	7592397	7591794	7591879	7591965	7592397	8,20,23	4,2,2	15,15,15	14,18,7	76	38	0.00586133	0.0190569	0.5,0.833,0.852	0.349,0.294,0.517	0.342
ENSG00000173821	RNF213	17	+	78362411	78363167	78362411	78362489	78362972	78363167	3,3,8	8,7,9	10,6,6	45,33,36	76	38	0.00589747	0.0191497	0.158,0.176,0.308	0.1,0.083,0.077	0.127
ENSG00000143207	RFWD2	1	-	175957423	175958615	175957423	175957548	175958497	175958615	4,3,1	2,4,0	3,5,3	21,30,24	76	38	0.00601184	0.019496	0.5,0.273,1.0	0.067,0.077,0.059	0.523
ENSG00000105135	ILVBL	19	-	15233503	15233841	15233503	15233615	15233702	15233841	0,0,1	15,9,24	10,10,12	23,42,36	76	38	0.00606255	0.0196352	0.0,0.0,0.02	0.179,0.106,0.143	-0.136
ENSG00000173145	NOC3L	10	-	96116930	96117972	96116930	96117088	96117839	96117972	4,2,2	1,4,2	2,3,2	19,15,12	76	38	0.00626615	0.0202686	0.667,0.2,0.333	0.05,0.091,0.077	0.327
ENSG00000128581	RABL5	7	-	100961404	100962313	100961404	100961494	100962236	100962313	6,2,2	8,10,11	3,3,4	46,29,36	76	38	0.00636128	0.0205404	0.273,0.091,0.083	0.032,0.049,0.053	0.104
ENSG00000083838	ZNF446	19	+	58991009	58991386	58991009	58991094	58991296	58991386	8,10,8	0,0,1	3,6,6	3,5,3	76	38	0.00636646	0.0205404	1.0,1.0,0.8	0.333,0.375,0.5	0.531
ENSG00000154222	CC2D1B	1	-	52821069	52821338	52821069	52821121	52821279	52821338	9,6,5	3,7,15	4,13,3	33,29,35	76	38	0.00670473	0.0216041	0.6,0.3,0.143	0.057,0.183,0.041	0.254
ENSG00000174775	HRAS	11	-	532241	532755	532241	532522	532630	532755	12,15,16	14,18,25	7,7,7	23,26,21	76	38	0.00698878	0.0224907	0.3,0.294,0.242	0.132,0.119,0.143	0.147
ENSG00000187325	TAF9B	X	-	77393245	77393595	77393245	77393380	77393458	77393595	15,8,10	53,75,49	5,5,4	63,63,70	76	38	0.00719265	0.0231173	0.124,0.051,0.093	0.038,0.038,0.028	0.055
ENSG00000160326	SLC2A6	9	-	136343375	136344218	136343375	136343538	136344089	136344218	3,7,2	0,1,2	3,2,3	8,13,8	76	38	0.00728725	0.0233915	1.0,0.778,0.333	0.158,0.071,0.158	0.575
ENSG00000177731	FLII	17	-	18149057	18149376	18149057	18149164	18149247	18149376	14,15,18	74,69,77	27,42,26	70,95,78	76	38	0.00732636	0.0234872	0.086,0.098,0.105	0.162,0.181,0.143	-0.066
ENSG00000138646	HERC5	4	+	89425382	89425748	89425382	89425566	89425645	89425748	3,4,1	10,14,13	0,0,3	35,32,21	76	38	0.0074706	0.0239192	0.13,0.125,0.037	0.0,0.0,0.067	0.075
ENSG00000161179	YDJC	22	-	21983298	21984050	21983298	21983696	21983890	21984050	78,89,47	0,2,2	50,55,36	4,5,4	76	38	0.00756243	0.0241825	1.0,0.957,0.922	0.862,0.846,0.818	0.118
ENSG00000115286	NDUFS7	19	+	1388523	1388937	1388523	1388592	1388831	1388937	7,9,5	29,42,45	2,1,3	37,52,40	76	38	0.00758689	0.02423	0.108,0.097,0.053	0.026,0.01,0.036	0.062
ENSG00000054967	RELT	11	+	73105521	73106330	73105521	73105779	73106131	73106330	15,18,21	3,1,0	9,16,10	3,9,4	76	38	0.00817481	0.0260747	0.714,0.9,1.0	0.6,0.471,0.556	0.329
ENSG00000137802	MAPKBP1	15	+	42104713	42105979	42104713	42105299	42105818	42105979	1,2,3	0,0,2	0,1,1	7,9,4	76	38	0.00830925	0.02647	1.0,1.0,0.429	0.0,0.053,0.111	0.755
ENSG00000152556	PFKM	12	+	48535522	48535849	48535522	48535610	48535696	48535849	9,6,10	147185178	7,5,8	352280311	76	38	0.00853563	0.0271569	0.03,0.016,0.027	0.01,0.009,0.013	0.014
ENSG00000007392	LUC7L	16	-	238967	240134	238967	239338	239966	240134	4,5,6	6,4,0	13,15,9	45,48,59	76	38	0.00864766	0.0274786	0.25,0.385,1.0	0.126,0.135,0.071	0.434
ENSG00000172053	QARS	3	-	49135624	49135913	49135624	49135691	49135785	49135913	21,30,29	77,74,81	25,25,24	123139101	76	38	0.00901924	0.0286233	0.12,0.169,0.152	0.092,0.083,0.106	0.053
ENSG00000143575	HAX1	1	+	154247425	154247736	154247425	154247477	154247629	154247736	26,30,26	2,5,13	17,17,30	17,16,15	76	38	0.00906048	0.0287166	0.867,0.75,0.5	0.333,0.347,0.5	0.312
ENSG00000161179	YDJC	22	-	21983596	21984050	21983596	21983696	21983831	21984050	40,40,59	1,1,1	19,29,21	2,4,3	76	38	0.00907139	0.0287166	0.952,0.952,0.967	0.826,0.784,0.778	0.161
ENSG00000178922	HYI	1	-	43916823	43917215	43916823	43916982	43917080	43917215	25,36,41	6,6,9	15,49,29	18,15,18	76	38	0.00928559	0.0293578	0.676,0.75,0.695	0.294,0.62,0.446	0.254
ENSG00000170889	RPS9	19	+	54710143	54710592	54710143	54710330	54710420	54710592	54,52,89	0,0,1	17,19,21	1,2,1	76	38	0.00936648	0.0295765	1.0,1.0,0.978	0.895,0.826,0.913	0.115
ENSG00000127980	PEX1	7	-	92122266	92123710	92122266	92122443	92123606	92123710	1,0,0	2,2,4	26,12,22	8,9,4	76	38	0.00961285	0.0303165	0.2,0.0,0.0	0.619,0.4,0.733	-0.517
ENSG00000107185	RGP1	9	+	35750654	35750986	35750654	35750738	35750836	35750986	11,7,4	4,9,6	6,5,5	18,17,19	76	38	0.0096487	0.0303916	0.579,0.28,0.25	0.143,0.128,0.116	0.241
ENSG00000149743	TRPT1	11	-	63991756	63992189	63991756	63991813	63992014	63992189	15,14,13	9,10,9	7,15,9	20,15,19	76	38	0.00972186	0.0305838	0.455,0.412,0.419	0.149,0.333,0.191	0.204
ENSG00000204351	SKIV2L	6	+	31936399	31936866	31936399	31936573	31936647	31936866	4,5,3	44,56,55	2,3,2	85111118	76	38	0.00994497	0.0312468	0.043,0.043,0.027	0.012,0.013,0.008	0.027
ENSG00000099949	LZTR1	22	+	21350984	21351255	21350984	21351090	21351174	21351255	5,9,8	2,3,3	10,12,15	14,23,11	76	38	0.0100638	0.0315807	0.556,0.6,0.571	0.263,0.207,0.405	0.284
ENSG00000102225	CDK16	X	+	47086392	47086622	47086392	47086498	47086558	47086622	14,28,52	3,0,1	6,18,5	2,3,5	76	38	0.0103232	0.0323546	0.7,1.0,0.963	0.6,0.75,0.333	0.327
ENSG00000143774	GUK1	1	+	228335106	228335400	228335106	228335245	228335321	228335400	32,46,41	1,0,0	11,14,14	2,4,0	76	38	0.0104499	0.0327112	0.941,1.0,1.0	0.733,0.636,1.0	0.191
ENSG00000160014	CALM3	19	+	47111738	47112238	47111738	47111845	47112102	47112238	3,4,2	47,33,35	2,0,0	72,67,46	76	38	0.0104766	0.0327539	0.031,0.057,0.028	0.014,0.0,0.0	0.034
ENSG00000127184	COX7C	5	+	85915169	85915695	85915169	85915313	85915555	85915695	136131191	0,2,0	21,38,41	1,1,1	76	38	0.0106627	0.0332944	1.0,0.97,1.0	0.913,0.95,0.953	0.051
ENSG00000196497	IPO4	14	-	24657757	24658003	24657757	24657844	24657924	24658003	9,13,14	5,10,5	0,3,6	5,6,11	76	38	0.0107539	0.0335379	0.474,0.394,0.583	0.0,0.2,0.214	0.346
ENSG00000182196	ARL6IP4	12	+	123465675	123466426	123465675	123465813	123466141	123466426	55,56,62	24,36,31	41,65,45	48,46,41	76	38	0.010771	0.0335497	0.534,0.438,0.5	0.299,0.414,0.354	0.135
ENSG00000071894	CPSF1	8	-	145619097	145619375	145619097	145619253	145619327	145619375	12,10,21	4,4,4	22,17,29	18,16,20	76	38	0.0108203	0.0336618	0.6,0.556,0.724	0.379,0.347,0.42	0.245
ENSG00000142910	TINAGL1	1	+	32048749	32050402	32048749	32049176	32050278	32050402	19,35,28	6,2,11	3,7,12	10,6,6	76	38	0.0110148	0.0342246	0.613,0.897,0.56	0.13,0.368,0.5	0.357
ENSG00000146830	GIGYF1	7	-	100281642	100281960	100281642	100281780	100281859	100281960	10,14,25	5,4,4	13,15,13	17,10,10	76	38	0.011139	0.034568	0.5,0.636,0.758	0.277,0.429,0.394	0.265
ENSG00000163702	IL17RC	3	+	9965564	9965975	9965564	9965704	9965915	9965975	1,0,0	5,13,11	11,15,9	23,24,24	76	38	0.011221	0.0347797	0.091,0.0,0.0	0.193,0.238,0.158	-0.166
ENSG00000150990	DHX37	12	-	125434958	125435350	125434958	125435096	125435235	125435350	2,4,1	1,6,4	10,9,3	49,46,30	76	38	0.011519	0.0356595	0.5,0.25,0.111	0.093,0.089,0.048	0.21
ENSG00000102226	USP11	X	+	47106702	47107098	47106702	47106818	47107009	47107098	1,0,0	54,66,80	8,8,9	139148122	76	38	0.0115502	0.0357121	0.009,0.0,0.0	0.028,0.026,0.036	-0.027
ENSG00000237441	RGL2	6	-	33261571	33261843	33261571	33261693	33261810	33261843	5,8,9	4,6,12	4,1,4	11,19,6	65	27	0.0116755	0.0360553	0.342,0.356,0.238	0.131,0.021,0.217	0.189
ENSG00000121073	SLC35B1	17	-	47783227	47783671	47783227	47783258	47783565	47783671	7,11,9	80,71,81	13,6,6	154130169	63	25	0.0118022	0.0364023	0.034,0.058,0.042	0.032,0.018,0.014	0.023
ENSG00000120889	TNFRSF10B	8	-	22885843	22886115	22885843	22885954	22886041	22886115	14,13,14	0,1,1	110125117	38,31,44	76	38	0.0118438	0.0364859	1.0,0.867,0.875	0.591,0.668,0.571	0.304
ENSG00000186815	TPCN1	12	+	113729678	113730878	113729678	113729763	113730738	113730878	0,2,1	11,13,12	10,21,10	23,34,25	76	38	0.011904	0.0366266	0.0,0.071,0.04	0.179,0.236,0.167	-0.157
ENSG00000071894	CPSF1	8	-	145625559	145625887	145625559	145625670	145625747	145625887	4,4,13	6,5,8	3,6,3	11,15,14	76	38	0.0121163	0.0372343	0.25,0.286,0.448	0.12,0.167,0.097	0.2
ENSG00000158850	B4GALT3	1	-	161143394	161143839	161143394	161143517	161143648	161143839	11,10,7	2,10,6	10,15,3	24,17,25	76	38	0.0122268	0.0375284	0.733,0.333,0.368	0.172,0.306,0.057	0.3
ENSG00000197858	GPAA1	8	+	145140191	145140646	145140191	145140382	145140475	145140646	17,17,38	66,57,63	11,15,12	65,73,54	76	38	0.012383	0.0379616	0.114,0.13,0.232	0.078,0.093,0.1	0.068
ENSG00000161996	WDR90	16	+	705772	706537	705772	705885	706301	706537	22,23,33	0,2,0	21,27,29	4,9,3	76	38	0.0124944	0.0382564	1.0,0.852,1.0	0.724,0.6,0.829	0.233
ENSG00000145833	DDX46	5	+	134152119	134153404	134152119	134152293	134153185	134153404	4,3,10	27,35,16	4,2,1	37,36,44	76	38	0.0126838	0.038776	0.069,0.041,0.238	0.051,0.027,0.011	0.086
ENSG00000010256	UQCRC1	3	-	48638112	48638551	48638112	48638273	48638407	48638551	11,19,23	41,31,67	5,8,14	44,66,40	76	38	0.0126948	0.038776	0.118,0.235,0.146	0.054,0.057,0.149	0.08
ENSG00000111665	CDCA3	12	-	6959630	6960173	6959630	6959760	6959996	6960173	6,5,4	4,6,0	13,13,5	38,43,27	76	38	0.0127693	0.0389564	0.429,0.294,1.0	0.146,0.131,0.085	0.454
ENSG00000154743	TSEN2	3	+	12544760	12545283	12544760	12544968	12545145	12545283	18,34,21	1,1,0	170164176	0,1,2	76	38	0.0128365	0.0391143	0.9,0.944,1.0	1.0,0.988,0.978	-0.041
ENSG00000178719	GRINA	8	+	145065859	145066541	145065859	145065972	145066045	145066541	12,18,24	4,1,2	3,5,2	8,2,1	76	38	0.0128872	0.0392213	0.6,0.9,0.857	0.158,0.556,0.5	0.381
ENSG00000173575	CHD2	15	+	93486072	93489095	93486072	93486298	93489050	93489095	62,64,57	0,1,2	2,10,5	0,2,0	76	38	0.0130696	0.0397285	1.0,0.97,0.934	1.0,0.714,1.0	0.063
ENSG00000114388	NPRL2	3	-	50386816	50387259	50386816	50386925	50387095	50387259	11,6,25	0,0,3	13,11,10	6,5,4	76	38	0.0131319	0.0398697	1.0,1.0,0.806	0.52,0.524,0.556	0.402
ENSG00000171863	RPS7	2	+	3622947	3623274	3622947	3623038	3623190	3623274	46,50,71	0,0,0	8,10,10	2,0,0	76	38	0.0133198	0.0403915	1.0,1.0,1.0	0.667,1.0,1.0	0.111
ENSG00000094631	HDAC6	X	+	48664037	48664871	48664037	48664078	48664774	48664871	0,0,2	11,11,3	24,28,9	29,24,23	73	35	0.0134432	0.0407168	0.0,0.0,0.242	0.284,0.359,0.158	-0.186
ENSG00000164896	FASTK	7	-	150773999	150774867	150773999	150774114	150774707	150774867	7,8,11	0,0,1	57,77,46	0,0,0	76	38	0.0134676	0.040742	1.0,1.0,0.846	1.0,1.0,1.0	-0.051
ENSG00000163930	BAP1	3	-	52436794	52437314	52436794	52436956	52437153	52437314	80100134	1,0,3	18,19,13	2,1,0	76	38	0.0137814	0.0416411	0.976,1.0,0.957	0.818,0.905,1.0	0.07
ENSG00000169727	GPS1	17	+	80014504	80015346	80014504	80014642	80014928	80015346	76,94,70	0,0,1	18,14,12	1,1,0	76	38	0.0139757	0.0421779	1.0,1.0,0.972	0.9,0.875,1.0	0.066
ENSG00000171824	EXOSC10	1	-	11136898	11137708	11136898	11137005	11137657	11137708	1,4,6	1,1,2	22,25,16	0,1,1	76	38	0.014401	0.0434095	0.333,0.667,0.6	1.0,0.926,0.889	-0.405
ENSG00000182004	SNRPE	1	+	203830730	203831350	203830730	203830871	203831309	203831350	87,95,119	6,5,8	53,38,27	4,7,8	73	35	0.0148254	0.0446353	0.874,0.901,0.877	0.864,0.722,0.618	0.149
ENSG00000008710	PKD1	16	-	2141781	2142189	2141781	2141907	2142047	2142189	1,2,2	1,2,0	3,4,3	17,19,22	76	38	0.0148611	0.0446896	0.333,0.333,1.0	0.081,0.095,0.064	0.475
ENSG00000111642	CHD4	12	-	6692192	6692544	6692192	6692279	6692363	6692544	21,27,22	32,33,39	23,21,22	51,64,56	76	38	0.0149302	0.044844	0.247,0.29,0.22	0.184,0.141,0.164	0.089
ENSG00000185163	DDX51	12	-	132626042	132626735	132626042	132626151	132626663	132626735	64,80,105	0,0,0	11,17,14	0,1,0	76	38	0.0149791	0.0449374	1.0,1.0,1.0	1.0,0.895,1.0	0.035
ENSG00000175061	C17orf76-AS1	17	+	16342640	16343017	16342640	16342728	16342894	16343017	704871971	8,11,9	682729582	14,15,13	76	38	0.0150529	0.0451051	0.978,0.975,0.982	0.961,0.96,0.957	0.019
ENSG00000100416	TRMU	22	+	46751340	46753234	46751340	46751485	46752738	46753234	19,24,27	1,0,0	19,39,26	9,3,5	76	38	0.0151456	0.0453289	0.905,1.0,1.0	0.514,0.867,0.722	0.267
ENSG00000127054	CPSF3L	1	-	1247605	1247881	1247605	1247748	1247819	1247881	20,19,17	10,11,17	19,17,18	25,30,23	76	38	0.0151821	0.0453843	0.5,0.463,0.333	0.275,0.221,0.281	0.173
ENSG00000106290	TAF6	7	-	99710971	99711392	99710971	99711028	99711238	99711392	13,9,16	7,1,2	5,15,8	13,9,8	76	38	0.0156596	0.0467564	0.481,0.818,0.8	0.161,0.455,0.333	0.383
ENSG00000164032	H2AFZ	4	-	100869244	100870097	100869244	100869680	100869967	100870097	25,28,29	15,10,27	17,22,21	26,23,30	76	38	0.0159141	0.04746	0.455,0.583,0.349	0.246,0.324,0.259	0.186
ENSG00000146263	MMS22L	6	-	97711210	97715878	97711210	97711324	97715747	97715878	3,2,9	0,1,1	3,3,0	3,6,5	76	38	0.0160083	0.0476848	1.0,0.5,0.818	0.333,0.2,0.0	0.595
ENSG00000115649	CNPPD1	2	-	220039499	220039830	220039499	220039628	220039709	220039830	2,2,7	0,1,0	1,3,5	8,5,6	76	38	0.0163692	0.0486448	1.0,0.5,1.0	0.059,0.231,0.294	0.639
ENSG00000204843	DCTN1	2	-	74593585	74594059	74593585	74593747	74593909	74594059	17,20,25	99119105	16,12,13	100140138	76	38	0.0163544	0.0486448	0.079,0.078,0.106	0.074,0.041,0.045	0.034
ENSG00000135506	OS9	12	+	58112775	58114046	58112775	58112965	58113881	58114046	15,23,23	30,47,45	16,18,14	61,63,48	76	38	0.016631	0.0493646	0.2,0.197,0.204	0.116,0.125,0.127	0.078

## Sheet: SkippedExon
GeneID	geneSymbol	chr	strand	exonStart_0base	exonEnd	upstreamES	upstreamEE	downstreamES	downstreamEE	IJC_SAMPLE_1	SJC_SAMPLE_1	IJC_SAMPLE_2	SJC_SAMPLE_2	IncFormLen	SkipFormLen	PValue	FDR	IncLevel1	IncLevel2	IncLevelDifference
ENSG00000163811	WDR43	2	+	29158386	29158473	29152444	29152576	29165177	29165247	2,2,1	15,45,30	54,55,46	0,0,0	76	38	0	0	0.063,0.022,0.016	1.0,1.0,1.0	-0.966
ENSG00000204569	PPP1R10	6	-	30572770	30572871	30572364	30572512	30573699	30573812	2,3,4	41,43,37	62,76,82	0,0,0	76	38	0	0	0.024,0.034,0.051	1.0,1.0,1.0	-0.964
ENSG00000156875	HIAT1	1	+	100534028	100534142	100533532	100533751	100542720	100542833	0,3,3	37,22,32	61,55,43	0,0,0	76	38	0	0	0.0,0.064,0.045	1.0,1.0,1.0	-0.964
ENSG00000096654	ZNF184	6	-	27435631	27435699	27425061	27425188	27440066	27440212	1,0,0	28,38,24	24,18,22	0,1,0	76	38	0	0	0.018,0.0,0.0	1.0,0.9,1.0	-0.961
ENSG00000156976	EIF4A2	3	+	186506098	186506205	186505283	186505373	186506913	186507670	38,42,37	340429414	197193198	1,0,0	76	38	0	0	0.053,0.047,0.043	0.99,1.0,1.0	-0.949
ENSG00000109046	WSB1	17	+	25637086	25637200	25636125	25636298	25638534	25638642	0,0,1	10,18,8	52,52,54	2,0,1	76	38	0	0	0.0,0.0,0.059	0.929,1.0,0.964	-0.945
ENSG00000166225	FRS2	12	+	69925793	69925836	69864199	69864310	69955959	69956054	1,1,0	16,14,12	17,16,13	0,1,0	74	38	0	0	0.031,0.035,0.0	1.0,0.891,1.0	-0.942
ENSG00000113460	BRIX1	5	+	34919944	34919988	34915814	34916002	34922321	34922392	5,9,5	47,73,61	53,40,41	1,0,0	76	38	0	0	0.051,0.058,0.039	0.964,1.0,1.0	-0.939
ENSG00000143294	PRCC	1	+	156761488	156761584	156756399	156756966	156764456	156764600	5,3,1	41,26,37	87,95,93	2,2,0	76	38	0	0	0.057,0.055,0.013	0.956,0.96,1.0	-0.93
ENSG00000113575	PPP2CA	5	-	133536675	133536765	133534776	133534895	133537538	133537712	2,4,6	19,27,28	64,56,47	0,0,0	76	38	0	0	0.05,0.069,0.097	1.0,1.0,1.0	-0.928
ENSG00000133884	DPF2	11	+	65111461	65111540	65111215	65111308	65113136	65113274	0,0,0	29,27,42	18,14,12	0,2,0	76	38	0	0	0.0,0.0,0.0	1.0,0.778,1.0	-0.926
ENSG00000133773	CCDC59	12	-	82748273	82748373	82746625	82747091	82750738	82751048	4,2,0	10,16,7	29,52,52	0,0,0	76	38	0	0	0.167,0.059,0.0	1.0,1.0,1.0	-0.925
ENSG00000178028	DMAP1	1	+	44680021	44680113	44679380	44679530	44680374	44680570	3,10,12	52,51,83	66,90,76	2,1,0	76	38	0	0	0.028,0.089,0.067	0.943,0.978,1.0	-0.912
ENSG00000113460	BRIX1	5	+	34923105	34923156	34922321	34922392	34923237	34923339	9,6,8	40,41,36	415361388	0,0,0	76	38	0	0	0.101,0.068,0.1	1.0,1.0,1.0	-0.91
ENSG00000169242	EFNA1	1	+	155105978	155106044	155103814	155104110	155106205	155106256	19,15,22	106104106	98118115	1,1,0	76	38	0	0	0.082,0.067,0.094	0.98,0.983,1.0	-0.907
ENSG00000112983	BRD8	5	-	137503622	137503767	137501516	137501797	137504910	137505047	0,3,0	26,30,26	25,17,29	2,0,2	76	38	0	0	0.0,0.048,0.0	0.862,1.0,0.879	-0.898
ENSG00000186480	INSIG1	7	+	155094456	155094556	155089968	155090407	155099950	155100467	1,0,1	7,7,4	12,10,9	1,0,0	76	38	1.88573e-08	1.26195e-06	0.067,0.0,0.111	0.857,1.0,1.0	-0.893
ENSG00000112983	BRD8	5	-	137504158	137504377	137501516	137501797	137504910	137505038	3,5,1	26,30,26	50,33,32	2,0,2	76	38	0	0	0.055,0.077,0.019	0.926,1.0,0.889	-0.888
ENSG00000102554	KLF5	13	+	73637961	73638021	73635998	73636872	73649845	73651676	3,4,3	17,11,13	103,98,61	0,0,0	76	38	0	0	0.081,0.154,0.103	1.0,1.0,1.0	-0.887
ENSG00000173559	OBFC2A	2	+	192548955	192549004	192548454	192548530	192550324	192550903	0,1,1	1,2,3	47,45,38	0,0,0	76	38	4.76953e-08	2.96343e-06	0.0,0.2,0.143	1.0,1.0,1.0	-0.886
ENSG00000166855	CLPX	15	-	65449115	65449270	65448029	65448194	65450083	65450248	0,2,0	3,3,2	19,14,21	1,0,0	76	38	4.67467e-06	0.000206999	0.0,0.25,0.0	0.905,1.0,1.0	-0.885
ENSG00000143367	TUFT1	1	+	151535060	151535162	151512798	151512902	151536379	151536466	2,1,5	13,17,11	49,49,37	1,1,0	76	38	0	0	0.071,0.029,0.185	0.961,0.961,1.0	-0.879
ENSG00000204713	TRIM27	6	-	28879472	28879495	28872330	28872442	28887788	28888019	1,5,4	23,23,31	120160138	0,0,0	34	38	0	0	0.046,0.195,0.126	1.0,1.0,1.0	-0.878
ENSG00000033800	PIAS1	15	+	68475967	68476005	68473549	68473692	68479879	68480402	1,0,0	1,1,1	37,38,37	0,0,0	64	38	6.81378e-05	0.00230813	0.373,0.0,0.0	1.0,1.0,1.0	-0.876
ENSG00000255717	SNHG1	11	-	62622359	62622410	62621990	62622023	62622895	62622951	5,8,14	14,30,33	81,96,58	0,0,0	65	27	0	0	0.129,0.1,0.15	1.0,1.0,1.0	-0.874
ENSG00000215301	DDX3X	X	+	41196660	41196718	41192650	41193550	41200736	41200869	90130118	351416421	299249214	0,0,1	76	38	0	0	0.114,0.135,0.123	1.0,1.0,0.991	-0.873
ENSG00000133226	SRRM1	1	+	24987803	24987887	24987209	24987290	24989150	24989295	2,0,3	13,15,11	8,13,8	0,0,1	76	38	4.27336e-11	3.94145e-09	0.071,0.0,0.12	1.0,1.0,0.8	-0.87
ENSG00000150938	CRIM1	2	+	36669757	36669878	36583068	36583766	36704031	36704214	0,1,0	12,16,12	7,9,10	2,0,0	76	38	4.97439e-10	4.07122e-08	0.0,0.03,0.0	0.636,1.0,1.0	-0.869
ENSG00000179335	CLK3	15	+	74920310	74920393	74919879	74920009	74920944	74921024	8,15,12	32,39,43	143135150	1,0,1	76	38	0	0	0.111,0.161,0.122	0.986,1.0,0.987	-0.86
ENSG00000113460	BRIX1	5	+	34918468	34918580	34915480	34916002	34922321	34923339	11,17,29	47,73,61	89,70,56	1,0,0	76	38	0	0	0.105,0.104,0.192	0.978,1.0,1.0	-0.859
ENSG00000082458	DLG3	X	+	69720320	69720430	69719726	69719899	69720747	69720839	0,0,3	3,1,2	34,41,45	0,0,0	76	38	7.53919e-06	0.000321835	0.0,0.0,0.429	1.0,1.0,1.0	-0.857
ENSG00000124789	NUP153	6	-	17624791	17625064	17616757	17616926	17628885	17629770	3,0,0	2,4,2	26,23,21	0,0,0	76	38	5.63806e-05	0.00195449	0.429,0.0,0.0	1.0,1.0,1.0	-0.857
ENSG00000133226	SRRM1	1	+	24987800	24987887	24987209	24987290	24989150	24989295	3,1,6	13,15,11	24,22,18	0,0,1	76	38	1.44329e-15	1.95376e-13	0.103,0.032,0.214	1.0,1.0,0.9	-0.85
ENSG00000100888	CHD8	14	-	21863456	21863511	21863070	21863278	21863975	21864051	3,2,5	12,7,9	88,75,95	0,0,0	76	38	0	0	0.111,0.125,0.217	1.0,1.0,1.0	-0.849
ENSG00000086589	RBM22	5	-	150078803	150078833	150078060	150078193	150080005	150080183	4,4,4	16,20,17	85,75,83	0,0,0	48	38	0	0	0.165,0.137,0.157	1.0,1.0,1.0	-0.847
ENSG00000075131	TIPIN	15	-	66644466	66644545	66633487	66633694	66645152	66645293	11,10,7	27,23,24	74,94,67	0,0,0	76	38	0	0	0.169,0.179,0.127	1.0,1.0,1.0	-0.842
ENSG00000173559	OBFC2A	2	+	192548955	192549022	192548454	192548530	192550324	192552298	0,2,1	1,2,3	92,82,90	0,0,0	76	38	1.54289e-09	1.17372e-07	0.0,0.333,0.143	1.0,1.0,1.0	-0.841
ENSG00000153207	AHCTF1	1	-	247007096	247007230	247002399	247004300	247012916	247014744	1,2,3	6,8,15	56,40,32	3,1,1	76	38	0	0	0.077,0.111,0.091	0.903,0.952,0.941	-0.839
ENSG00000004455	AK2	1	-	33487193	33487304	33480122	33480195	33502336	33502441	4,1,7	25,21,26	10,11,9	0,2,0	76	38	1.07988e-11	1.05912e-09	0.074,0.023,0.119	1.0,0.733,1.0	-0.839
ENSG00000146083	RNF44	5	-	175956288	175956388	175953697	175956091	175956523	175956645	0,1,0	4,2,4	10,13,12	2,0,0	76	38	2.575e-05	0.000986357	0.0,0.2,0.0	0.714,1.0,1.0	-0.838
ENSG00000164045	CDC25A	3	-	48222210	48222330	48219343	48219478	48224418	48224520	2,4,8	16,17,16	99,92,63	2,5,0	76	38	0	0	0.059,0.105,0.2	0.961,0.902,1.0	-0.833
ENSG00000082701	GSK3B	3	-	119595259	119595355	119582265	119582452	119812193	119813264	2,8,6	19,9,16	55,38,41	0,0,0	76	38	0	0	0.05,0.308,0.158	1.0,1.0,1.0	-0.828
ENSG00000111011	RSRC2	12	-	123005050	123005128	123003386	123003598	123005931	123005975	0,4,0	14,9,21	12,14,8	3,0,0	76	38	7.68101e-10	6.104e-08	0.0,0.182,0.0	0.667,1.0,1.0	-0.828
ENSG00000153006	SREK1IP1	5	-	64050141	64050189	64036883	64037027	64064331	64064512	2,1,2	6,8,9	37,29,34	0,2,2	76	38	1.65423e-14	2.01003e-12	0.143,0.059,0.1	1.0,0.879,0.895	-0.824
ENSG00000115963	RND3	2	-	151343207	151343295	151331388	151331498	151343781	151344181	65,69,63	192208191	86134157	3,1,2	76	38	0	0	0.145,0.142,0.142	0.935,0.985,0.975	-0.822
ENSG00000067334	DNTTIP2	1	-	94341200	94341339	94338674	94338770	94341823	94343418	19,27,25	58,45,72	236284238	1,1,0	76	38	0	0	0.141,0.231,0.148	0.992,0.993,1.0	-0.822
ENSG00000082258	CCNT2	2	+	135710210	135710281	135705305	135705469	135710799	135714413	4,0,6	5,7,9	49,55,49	0,0,0	76	38	1.21014e-14	1.50117e-12	0.286,0.0,0.25	1.0,1.0,1.0	-0.821
ENSG00000168411	RFWD3	16	-	74683029	74683100	74678438	74678633	74694829	74695349	3,2,11	9,13,11	118,88,92	0,0,0	76	38	0	0	0.143,0.071,0.333	1.0,1.0,1.0	-0.818
ENSG00000171988	JMJD1C	10	-	64975312	64975376	64975197	64975215	64976966	64977091	6,2,0	4,5,1	22,32,45	0,1,1	50	12	1.9089e-06	9.13449e-05	0.265,0.088,0.0	1.0,0.885,0.915	-0.816
ENSG00000113460	BRIX1	5	+	34918468	34918580	34915480	34916002	34925330	34926101	14,16,30	36,43,48	89,70,56	0,0,0	76	38	0	0	0.163,0.157,0.238	1.0,1.0,1.0	-0.814
ENSG00000131051	RBM39	20	-	34328446	34328519	34327024	34327469	34328745	34328809	7,4,7	13,17,13	127140123	2,1,0	76	38	0	0	0.212,0.105,0.212	0.969,0.986,1.0	-0.809
ENSG00000169251	NMD3	3	+	160968043	160968114	160967241	160967348	160968567	160968678	8,9,5	14,15,18	48,72,64	0,0,0	76	38	0	0	0.222,0.231,0.122	1.0,1.0,1.0	-0.808
ENSG00000165271	NOL6	9	-	33470009	33470189	33468955	33469119	33472001	33472118	11,13,16	24,23,35	57,51,54	0,0,0	76	38	0	0	0.186,0.22,0.186	1.0,1.0,1.0	-0.803
ENSG00000101665	SMAD7	18	-	46468850	46468925	46446222	46448280	46474753	46474807	0,1,2	1,5,1	15,21,19	0,0,0	76	38	0.00176312	0.0333355	0.0,0.091,0.5	1.0,1.0,1.0	-0.803
ENSG00000131931	THAP1	8	-	42694328	42694524	42691816	42693479	42698166	42698468	29,33,29	80,81,93	32,43,48	1,0,2	76	38	0	0	0.153,0.169,0.135	0.941,1.0,0.923	-0.802
ENSG00000146223	RPL7L1	6	+	42853711	42853821	42852350	42852488	42853993	42854208	9,14,17	25,36,40	235200145	4,7,1	76	38	0	0	0.153,0.163,0.175	0.967,0.935,0.986	-0.799
ENSG00000130706	ADRM1	20	+	60883423	60883526	60883076	60883234	60883710	60883916	21,12,22	56,63,82	192225144	8,6,9	76	38	0	0	0.158,0.087,0.118	0.923,0.949,0.889	-0.799
ENSG00000196646	ZNF136	19	+	12296599	12296726	12273878	12274021	12296928	12296972	1,1,0	5,4,4	9,3,3	0,1,0	76	38	0.000715019	0.0164551	0.091,0.111,0.0	1.0,0.6,1.0	-0.799
ENSG00000133884	DPF2	11	+	65108869	65109033	65108436	65108544	65111215	65111308	1,3,2	5,5,3	59,87,74	1,0,0	76	38	2.4758e-14	2.99807e-12	0.091,0.231,0.25	0.967,1.0,1.0	-0.798
ENSG00000169180	XPO6	16	-	28188540	28188653	28187218	28187416	28222686	28223190	3,1,3	7,4,7	9,12,12	0,1,0	76	38	5.12737e-07	2.74503e-05	0.176,0.111,0.176	1.0,0.857,1.0	-0.798
ENSG00000166225	FRS2	12	+	69924644	69924740	69864154	69864310	69955959	69956054	6,4,2	16,14,12	4,6,2	0,1,0	76	38	2.94808e-05	0.00110715	0.158,0.125,0.077	1.0,0.75,1.0	-0.797
ENSG00000168066	SF1	11	-	64540901	64540977	64537727	64537880	64543969	64544098	25,22,40	60,95,92	106,119,84	4,0,4	76	38	0	0	0.172,0.104,0.179	0.93,1.0,0.913	-0.796
ENSG00000164045	CDC25A	3	-	48218860	48218932	48215773	48215947	48219343	48219478	10,13,19	24,25,37	129102114	0,0,2	76	38	0	0	0.172,0.206,0.204	1.0,1.0,0.966	-0.795
ENSG00000101413	RPRD1B	20	+	36676749	36676883	36668836	36668966	36685933	36686046	2,0,6	3,5,7	35,27,31	0,1,0	76	38	3.90939e-09	2.87566e-07	0.25,0.0,0.3	1.0,0.931,1.0	-0.794
ENSG00000058729	RIOK2	5	-	96508878	96508967	96506909	96507101	96512819	96512995	1,0,3	2,7,2	86,54,33	0,0,0	76	38	5.67321e-10	4.5904e-08	0.2,0.0,0.429	1.0,1.0,1.0	-0.79
ENSG00000065802	ASB1	2	+	239344351	239344654	239342189	239342336	239352982	239353016	0,1,1	3,5,6	17,15,20	4,1,0	66	28	1.85188e-06	8.89754e-05	0.0,0.078,0.066	0.643,0.864,1.0	-0.788
ENSG00000122386	ZNF205	16	+	3168905	3169016	3166427	3166548	3169256	3169497	2,0,3	7,9,8	14,17,13	2,0,1	76	38	5.3862e-09	3.90549e-07	0.125,0.0,0.158	0.778,1.0,0.867	-0.787
ENSG00000141570	CBX8	17	-	77770295	77770339	77770048	77770114	77770728	77770915	2,6,1	5,4,10	80,66,80	0,0,0	76	38	9.65894e-15	1.21084e-12	0.167,0.429,0.048	1.0,1.0,1.0	-0.785
ENSG00000113369	ARRDC3	5	-	90672437	90672585	90671327	90671430	90674510	90674592	23,26,23	148171196	121103109	12,7,11	76	38	0	0	0.072,0.071,0.055	0.834,0.88,0.832	-0.783
ENSG00000134186	PRPF38B	1	+	109238898	109238959	109238664	109238816	109241225	109241449	22,24,27	33,40,61	59,61,79	0,0,0	76	38	0	0	0.25,0.231,0.181	1.0,1.0,1.0	-0.779
ENSG00000132382	MYBBP1A	17	-	4443642	4443779	4442733	4443262	4444757	4444859	14,25,20	31,38,37	73,68,77	1,0,0	76	38	0	0	0.184,0.248,0.213	0.973,1.0,1.0	-0.776
ENSG00000163960	UBXN7	3	-	196088714	196088794	196074532	196083717	196089164	196089558	4,10,5	12,15,13	55,71,73	2,1,1	76	38	0	0	0.143,0.25,0.161	0.932,0.973,0.973	-0.775
ENSG00000062194	GPBP1	5	+	56509900	56510020	56471274	56472227	56526672	56526796	2,3,0	4,7,6	31,21,23	3,0,2	76	38	1.52656e-08	1.03917e-06	0.2,0.176,0.0	0.838,1.0,0.852	-0.771
ENSG00000133997	MED6	14	-	71052472	71052500	71050802	71051660	71059596	71059705	0,1,1	4,1,3	24,36,27	0,0,0	44	38	5.88836e-07	3.12126e-05	0.0,0.463,0.224	1.0,1.0,1.0	-0.771
ENSG00000163848	ZNF148	3	-	125050001	125050082	125032407	125032500	125093945	125094122	0,1,4	2,6,2	8,16,14	0,1,0	76	38	0.00038301	0.00991234	0.0,0.077,0.5	1.0,0.889,1.0	-0.771
ENSG00000160679	CHTOP	1	+	153615702	153615840	153614721	153614905	153617539	153618782	3,1,6	7,9,8	50,49,44	0,3,2	76	38	6.71685e-14	7.86623e-12	0.176,0.053,0.273	1.0,0.891,0.917	-0.769
ENSG00000114019	AMOTL2	3	-	134084658	134084751	134080353	134080649	134085124	134085269	47,50,72	76,89,106	38,59,35	0,0,0	76	38	0	0	0.236,0.219,0.254	1.0,1.0,1.0	-0.764
ENSG00000156976	EIF4A2	3	+	186506098	186506205	186504915	186505053	186506913	186507670	34,39,34	47,53,76	195193198	0,0,0	76	38	0	0	0.266,0.269,0.183	1.0,1.0,1.0	-0.761
ENSG00000160714	UBE2Q1	1	-	154525211	154525296	154524879	154524940	154525507	154525648	8,17,25	33,18,30	98,94,113	0,0,0	76	38	0	0	0.108,0.321,0.294	1.0,1.0,1.0	-0.759
ENSG00000255717	SNHG1	11	-	62621489	62621536	62621272	62621305	62621990	62622023	12,9,22	17,15,22	136122123	3,1,3	54	16	0	0	0.173,0.151,0.229	0.931,0.973,0.924	-0.758
ENSG00000048162	NOP16	5	-	175813840	175813910	175812221	175812328	175815433	175815569	4,1,0	3,2,1	56,38,39	0,2,1	76	38	1.63517e-05	0.000652469	0.4,0.2,0.0	1.0,0.905,0.951	-0.752
ENSG00000133316	WDR74	11	-	62603432	62603508	62603166	62603313	62606585	62606707	6,6,8	8,11,11	52,66,54	0,0,0	76	38	0	0	0.273,0.214,0.267	1.0,1.0,1.0	-0.749
ENSG00000144381	HSPD1	2	-	198354920	198355020	198353725	198353971	198358047	198358216	19,32,36	51,41,49	48,38,26	0,1,0	76	38	0	0	0.157,0.281,0.269	1.0,0.95,1.0	-0.748
ENSG00000123737	EXOSC9	4	+	122737523	122737602	122735020	122735202	122737926	122738064	6,11,7	16,14,12	109,84,81	0,3,1	76	38	0	0	0.158,0.282,0.226	1.0,0.933,0.976	-0.748
ENSG00000134222	PSRC1	1	-	109823017	109823111	109822188	109822778	109823398	109823873	9,9,16	16,16,22	79,88,82	1,0,1	76	38	0	0	0.22,0.22,0.267	0.975,1.0,0.976	-0.748
ENSG00000129484	PARP2	14	+	20824748	20824848	20824465	20824593	20825796	20826064	1,0,5	2,2,2	54,44,23	0,0,0	76	38	5.27382e-05	0.00184158	0.2,0.0,0.556	1.0,1.0,1.0	-0.748
ENSG00000255717	SNHG1	11	-	62622359	62622688	62621839	62622023	62622895	62622960	14,14,21	14,30,33	113,123,93	0,0,0	76	38	0	0	0.333,0.189,0.241	1.0,1.0,1.0	-0.746
ENSG00000136869	TLR4	9	+	120470840	120471007	120466649	120466843	120474666	120478053	0,0,0	4,14,13	7,5,8	1,3,0	76	38	8.81656e-06	0.000371464	0.0,0.0,0.0	0.778,0.455,1.0	-0.744
ENSG00000107815	C10orf2	10	+	102750192	102750300	102749400	102749641	102750625	102750811	2,3,1	3,2,5	49,33,46	0,0,0	76	38	6.55989e-09	4.71808e-07	0.25,0.429,0.091	1.0,1.0,1.0	-0.743
ENSG00000112983	BRD8	5	-	137507049	137507099	137506726	137506849	137513259	137513356	5,7,9	8,12,10	109108101	0,0,0	76	38	0	0	0.238,0.226,0.31	1.0,1.0,1.0	-0.742
ENSG00000198625	MDM4	1	+	204513662	204513812	204511911	204512072	204515924	204516005	1,0,3	7,18,14	30,46,54	6,5,5	76	38	0	0	0.067,0.0,0.097	0.714,0.821,0.844	-0.738
ENSG00000180318	ALX1	12	+	85677349	85677654	85673884	85674265	85694932	85695562	3,5,8	5,10,7	53,52,72	0,0,0	76	38	2.22045e-16	3.2005e-14	0.231,0.2,0.364	1.0,1.0,1.0	-0.735
ENSG00000171988	JMJD1C	10	-	64975312	64975456	64975022	64975215	64976966	64977091	6,4,0	4,5,1	25,38,50	0,1,1	76	38	5.68364e-06	0.000247977	0.429,0.286,0.0	1.0,0.95,0.962	-0.732
ENSG00000165271	NOL6	9	-	33468749	33468870	33468505	33468564	33468955	33469119	10,21,15	19,18,24	59,61,70	0,0,0	76	38	0	0	0.208,0.368,0.238	1.0,1.0,1.0	-0.729
ENSG00000131051	RBM39	20	-	34292589	34292668	34291531	34292503	34293146	34293252	0,7,8	12,5,6	65,122,88	0,0,0	76	38	1.31006e-14	1.61947e-12	0.0,0.412,0.4	1.0,1.0,1.0	-0.729
ENSG00000086061	DNAJA1	9	+	33029882	33029987	33026810	33026988	33030437	33030665	9,14,15	14,27,13	186214226	0,0,0	76	38	0	0	0.243,0.206,0.366	1.0,1.0,1.0	-0.728
ENSG00000170776	AKAP13	15	+	86028940	86028984	85923945	85924029	86064658	86064806	4,4,12	17,28,21	48,49,44	4,6,2	76	38	0	0	0.105,0.067,0.222	0.857,0.803,0.917	-0.728
ENSG00000121864	ZNF639	3	+	179047405	179047516	179045905	179046139	179050776	179050911	5,6,9	8,10,13	84,79,98	2,2,0	76	38	0	0	0.238,0.231,0.257	0.955,0.952,1.0	-0.727
ENSG00000112578	BYSL	6	+	41897869	41898008	41895111	41895274	41898372	41898506	8,11,3	10,9,10	78,52,70	1,0,0	76	38	0	0	0.286,0.379,0.13	0.975,1.0,1.0	-0.727
ENSG00000157881	PANK4	1	-	2444326	2444478	2443066	2443122	2445440	2445528	3,3,0	3,2,5	37,40,31	0,0,1	76	38	4.0416e-07	2.19678e-05	0.333,0.429,0.0	1.0,1.0,0.939	-0.726
ENSG00000251022	RP11-163O17.1	4	-	83816844	83816927	83814638	83816000	83821229	83821376	2,0,1	15,12,23	37,24,20	6,6,2	76	38	0	0	0.063,0.0,0.021	0.755,0.667,0.833	-0.724
ENSG00000163900	TMEM41A	3	-	185212410	185212549	185207388	185209545	185214615	185214769	8,4,10	14,8,14	33,24,34	0,2,0	76	38	5.68434e-14	6.72339e-12	0.222,0.2,0.263	1.0,0.857,1.0	-0.724
ENSG00000167962	ZNF598	16	-	2048965	2049122	2048702	2048853	2049496	2050257	1,3,2	1,4,5	27,33,42	0,1,0	76	38	2.06209e-08	1.37223e-06	0.333,0.273,0.167	1.0,0.943,1.0	-0.723
ENSG00000160799	CCDC12	3	-	46965096	46965158	46963725	46963802	46966945	46967025	0,5,2	4,5,1	55,61,45	0,0,0	76	38	1.06187e-07	6.29027e-06	0.0,0.333,0.5	1.0,1.0,1.0	-0.722
ENSG00000166851	PLK1	16	+	23695190	23695410	23691404	23691573	23698789	23698945	20,26,14	24,24,29	327339347	0,0,0	76	38	0	0	0.294,0.351,0.194	1.0,1.0,1.0	-0.72
ENSG00000102096	PIM2	X	-	48771671	48771848	48770458	48771571	48772296	48772669	1,2,3	6,5,1	53,64,69	0,0,0	76	38	8.81546e-09	6.22714e-07	0.077,0.167,0.6	1.0,1.0,1.0	-0.719
ENSG00000013588	GPRC5A	12	+	13065017	13065076	13061176	13062105	13065380	13066067	51,75,59	67,76,92	370510545	0,0,1	76	38	0	0	0.276,0.33,0.243	1.0,1.0,0.996	-0.716
ENSG00000175376	EIF1AD	11	-	65766820	65766868	65764015	65766214	65767037	65767146	9,3,15	20,11,7	37,77,55	0,0,1	76	38	3.07976e-13	3.45885e-11	0.184,0.12,0.517	1.0,1.0,0.965	-0.715
ENSG00000140265	ZSCAN29	15	-	43656112	43656580	43650369	43654139	43658307	43659006	2,4,5	3,5,8	37,23,34	0,1,0	76	38	2.38181e-10	2.01419e-08	0.25,0.286,0.238	1.0,0.92,1.0	-0.715
ENSG00000173575	CHD2	15	+	93480747	93480855	93470473	93470560	93482807	93482948	5,7,8	6,8,11	51,65,48	0,0,0	76	38	0	0	0.294,0.304,0.267	1.0,1.0,1.0	-0.712
ENSG00000062650	WAPAL	10	-	88203031	88203120	88197676	88197772	88205998	88206206	1,2,3	2,2,3	153128141	0,0,0	76	38	1.73339e-12	1.8258e-10	0.2,0.333,0.333	1.0,1.0,1.0	-0.711
ENSG00000131051	RBM39	20	-	34326889	34326939	34319862	34320057	34329862	34330024	34,50,48	54,62,45	337267244	0,0,0	76	38	0	0	0.239,0.287,0.348	1.0,1.0,1.0	-0.709
ENSG00000108312	UBTF	17	-	42285231	42285279	42285066	42285138	42286719	42286909	5,13,22	10,12,23	97113121	0,0,0	76	38	0	0	0.2,0.351,0.324	1.0,1.0,1.0	-0.708
ENSG00000165244	ZNF367	9	-	99154679	99154818	99148222	99150741	99160445	99160596	6,9,6	9,9,7	88,98,110	0,0,0	76	38	0	0	0.25,0.333,0.3	1.0,1.0,1.0	-0.706
ENSG00000137502	RAB30	11	-	82705080	82705148	82698624	82698812	82708265	82708366	7,2,2	5,4,6	35,25,32	1,1,0	76	38	3.61793e-08	2.30098e-06	0.412,0.2,0.143	0.946,0.926,1.0	-0.706
ENSG00000165271	NOL6	9	-	33469204	33470189	33468955	33469119	33472001	33472118	18,24,26	24,23,35	86,89,86	0,0,0	76	38	0	0	0.273,0.343,0.271	1.0,1.0,1.0	-0.704
ENSG00000255073	ZFP91-CNTF	11	+	58352328	58352357	58346644	58347095	58377302	58377512	0,2,1	2,3,1	26,27,17	0,2,0	46	38	7.72852e-05	0.00258844	0.0,0.355,0.452	1.0,0.918,1.0	-0.704
ENSG00000175063	UBE2C	20	+	44444028	44444179	44443022	44443109	44444492	44444552	1,0,1	4,2,2	5,10,14	1,1,1	76	38	0.000708307	0.0163429	0.111,0.0,0.2	0.714,0.833,0.875	-0.704
ENSG00000205213	LGR4	11	-	27393161	27393245	27387507	27390690	27395097	27395223	2,6,3	3,5,4	123112110	0,0,0	76	38	1.55431e-15	2.09608e-13	0.25,0.375,0.273	1.0,1.0,1.0	-0.701
ENSG00000134690	CDCA8	1	+	38171112	38171239	38168923	38169019	38173993	38175385	1,2,2	3,2,2	21,24,14	1,0,0	76	38	3.89677e-05	0.00141853	0.143,0.333,0.333	0.913,1.0,1.0	-0.701
ENSG00000117000	RLF	1	+	40697188	40697330	40668083	40668286	40701463	40706593	2,0,4	1,4,3	28,10,20	0,0,0	76	38	0.00189579	0.0352082	0.5,0.0,0.4	1.0,1.0,1.0	-0.7
ENSG00000146457	WTAP	6	+	160163119	160163178	160146616	160148365	160164696	160164824	3,2,6	4,2,7	50,42,35	0,0,0	76	38	7.11368e-11	6.41167e-09	0.273,0.333,0.3	1.0,1.0,1.0	-0.698
ENSG00000111845	PAK1IP1	6	+	10703637	10703690	10702797	10702872	10704739	10704885	6,4,9	5,8,9	110117119	0,0,0	76	38	0	0	0.375,0.2,0.333	1.0,1.0,1.0	-0.697
ENSG00000158006	PAFAH2	1	-	26299048	26299203	26286257	26288574	26300970	26301141	2,2,0	3,1,3	20,21,18	0,2,0	76	38	0.000360083	0.00939171	0.25,0.5,0.0	1.0,0.84,1.0	-0.697
ENSG00000100410	PHF5A	22	-	41864023	41864151	41863451	41863618	41864605	41864629	3,5,5	3,5,5	36,40,28	0,0,2	56	18	1.12905e-07	6.67717e-06	0.243,0.243,0.243	1.0,1.0,0.818	-0.696
ENSG00000104140	RHOV	15	-	41165881	41165940	41164411	41165699	41166129	41166487	1,0,2	1,3,2	49,67,55	2,3,3	76	38	1.70916e-05	0.000679124	0.333,0.0,0.333	0.925,0.918,0.902	-0.693
ENSG00000153207	AHCTF1	1	-	247005995	247006078	247002399	247004300	247012916	247013151	3,9,9	6,8,15	62,77,97	3,1,1	76	38	0	0	0.2,0.36,0.231	0.912,0.975,0.98	-0.692
ENSG00000111011	RSRC2	12	-	122991380	122991470	122989239	122990253	122992764	122992994	17,19,26	17,28,29	131134125	2,0,0	76	38	0	0	0.333,0.253,0.31	0.97,1.0,1.0	-0.691
ENSG00000156976	EIF4A2	3	+	186506098	186506209	186505102	186505373	186506913	186507080	314373362	340429414	271276293	1,0,0	76	38	0	0	0.316,0.303,0.304	0.993,1.0,1.0	-0.69
ENSG00000159086	GCFC1	21	-	34123227	34123343	34120809	34121009	34123429	34123529	11,11,15	13,15,19	199247225	4,5,2	76	38	0	0	0.297,0.268,0.283	0.961,0.961,0.983	-0.686
ENSG00000126821	SGPP1	14	-	64165286	64165376	64150931	64153374	64193978	64194757	16,13,29	20,20,30	148166145	2,3,2	76	38	0	0	0.286,0.245,0.326	0.974,0.965,0.973	-0.685
ENSG00000166851	PLK1	16	+	23692234	23692379	23691404	23691573	23698789	23698945	19,22,31	24,24,29	218278234	0,0,0	76	38	0	0	0.284,0.314,0.348	1.0,1.0,1.0	-0.685
ENSG00000103121	CMC2	16	-	81030918	81031034	81009698	81010076	81040338	81040719	15,21,23	40,47,34	40,75,53	1,4,7	76	38	0	0	0.158,0.183,0.253	0.952,0.904,0.791	-0.684
ENSG00000175213	ZNF408	11	+	46724253	46724315	46722948	46723226	46724533	46724793	20,25,27	25,21,33	59,69,67	0,0,0	76	38	0	0	0.286,0.373,0.29	1.0,1.0,1.0	-0.684
ENSG00000134077	THUMPD3	3	+	9425895	9426019	9416199	9416330	9426207	9428475	3,10,8	6,7,8	85,55,66	0,0,0	76	38	2.88658e-15	3.83463e-13	0.2,0.417,0.333	1.0,1.0,1.0	-0.683
ENSG00000117525	F3	1	-	94997876	94998036	94994780	94996152	94998645	94998824	2,2,2	5,3,3	139108105	3,4,12	76	38	1.37229e-09	1.05294e-07	0.167,0.25,0.25	0.959,0.931,0.814	-0.679
ENSG00000117139	KDM5B	1	-	202700955	202701067	202700036	202700191	202702528	202703014	3,1,2	1,2,5	19,24,35	0,0,0	76	38	0.000212595	0.00612363	0.6,0.2,0.167	1.0,1.0,1.0	-0.678
ENSG00000107937	GTPBP4	10	+	1041868	1041972	1034337	1034467	1042045	1042182	26,28,42	28,31,40	198243209	0,0,0	76	38	0	0	0.317,0.311,0.344	1.0,1.0,1.0	-0.676
ENSG00000125845	BMP2	20	+	6750766	6751119	6748310	6749522	6758891	6760910	17,13,26	36,24,43	15,14,15	0,1,2	76	38	1.06809e-10	9.41242e-09	0.191,0.213,0.232	1.0,0.875,0.789	-0.676
ENSG00000138297	TIMM23	10	-	51606987	51607098	51592414	51592619	51623108	51623203	23,32,31	27,39,24	153138108	0,0,0	76	38	0	0	0.299,0.291,0.392	1.0,1.0,1.0	-0.673
ENSG00000157741	UBN2	7	+	138943233	138943371	138921750	138921843	138944012	138944116	1,2,5	3,3,3	13,14,9	1,0,0	76	38	0.000663164	0.0155841	0.143,0.25,0.455	0.867,1.0,1.0	-0.673
ENSG00000131051	RBM39	20	-	34317383	34317473	34313045	34313077	34319862	34320057	2,0,1	6,9,11	4,8,3	1,0,1	64	26	4.54392e-05	0.00162585	0.119,0.0,0.036	0.619,1.0,0.549	-0.671
ENSG00000147274	RBMX	X	-	135961477	135961612	135961258	135961282	135962755	135962884	55,62,32	26,43,28	176143231	0,0,0	56	18	0	0	0.405,0.317,0.269	1.0,1.0,1.0	-0.67
ENSG00000156976	EIF4A2	3	+	186505591	186505671	186505283	186505373	186506913	186506929	8401019914	340429414	702747708	1,0,0	48	10	0	0	0.34,0.331,0.315	0.993,1.0,1.0	-0.669
ENSG00000113161	HMGCR	5	+	74650880	74651039	74650327	74650522	74651189	74651347	4,5,3	11,5,3	149115110	8,1,4	76	38	1.36557e-14	1.68226e-12	0.154,0.333,0.333	0.903,0.983,0.932	-0.666
ENSG00000004455	AK2	1	-	33490042	33490168	33480122	33480195	33502336	33502445	22,18,23	25,21,26	39,38,33	0,2,0	76	38	0	0	0.306,0.3,0.307	1.0,0.905,1.0	-0.664
ENSG00000108256	NUFIP2	17	-	27594515	27594548	27582854	27591609	27613009	27614734	7,11,24	13,20,20	95,92,85	0,0,0	54	38	0	0	0.275,0.279,0.458	1.0,1.0,1.0	-0.663
ENSG00000164327	RICTOR	5	-	38944547	38944671	38938020	38942480	38945014	38945170	1,4,1	3,1,2	63,73,71	0,0,0	76	38	1.51664e-06	7.47857e-05	0.143,0.667,0.2	1.0,1.0,1.0	-0.663
ENSG00000255717	SNHG1	11	-	62622359	62622410	62621990	62622023	62622604	62622688	18,22,26	28,20,26	227250194	1,11,8	65	27	0	0	0.211,0.314,0.293	0.99,0.904,0.91	-0.662
ENSG00000172977	KAT5	11	+	65484137	65484278	65482291	65482381	65484359	65484453	10,11,3	4,9,16	187135161	0,0,0	76	38	0	0	0.556,0.379,0.086	1.0,1.0,1.0	-0.66
ENSG00000154832	CXXC1	18	-	47811089	47811209	47810747	47810932	47811371	47811617	6,11,14	7,8,17	42,67,68	0,0,1	76	38	0	0	0.3,0.407,0.292	1.0,1.0,0.971	-0.657
ENSG00000047634	SCML1	X	+	17764134	17764218	17755591	17755800	17767519	17767624	1,1,3	1,3,2	14,11,15	1,0,0	76	38	0.00114082	0.0239196	0.333,0.143,0.429	0.875,1.0,1.0	-0.657
ENSG00000115274	INO80B	2	+	74682928	74683063	74682532	74682725	74683229	74683399	7,2,3	4,2,5	49,38,37	0,0,0	76	38	1.37894e-08	9.42282e-07	0.467,0.333,0.231	1.0,1.0,1.0	-0.656
ENSG00000100888	CHD8	14	-	21881071	21881155	21878009	21878147	21883732	21883801	3,4,1	4,1,5	34,20,22	0,0,0	76	38	0.000410883	0.0105239	0.273,0.667,0.091	1.0,1.0,1.0	-0.656
ENSG00000003756	RBM5	3	+	50137964	50138038	50137414	50137484	50140515	50140599	2,2,1	5,4,4	15,16,7	0,2,2	76	38	0.00016548	0.00496329	0.167,0.2,0.111	1.0,0.8,0.636	-0.653
ENSG00000215301	DDX3X	X	+	41198288	41198336	41196660	41196718	41200736	41200869	64,83,82	54,85,81	962949848	0,1,2	76	38	0	0	0.372,0.328,0.336	1.0,0.998,0.995	-0.652
ENSG00000103035	PSMD7	16	+	74335452	74335550	74334012	74334104	74336109	74336190	12,18,13	11,14,15	131134115	0,0,0	76	38	0	0	0.353,0.391,0.302	1.0,1.0,1.0	-0.651
ENSG00000099812	C19orf21	19	+	761624	761663	759908	760039	763500	764318	13,10,14	15,19,20	196210178	9,5,9	66	38	0	0	0.333,0.233,0.287	0.926,0.96,0.919	-0.651
ENSG00000162231	NXF1	11	-	62570890	62571044	62569648	62569732	62571263	62571450	8,12,15	8,15,10	113,100,96	0,0,0	76	38	0	0	0.333,0.286,0.429	1.0,1.0,1.0	-0.651
ENSG00000160908	ZNF394	7	-	99096338	99096465	99090862	99092254	99097260	99097920	0,2,0	19,9,8	11,19,14	5,5,1	76	38	6.9801e-09	5.00011e-07	0.0,0.1,0.0	0.524,0.655,0.875	-0.651
ENSG00000100221	JOSD1	22	-	39084939	39085134	39083722	39084006	39095807	39095975	2,5,0	2,1,1	139,94,85	0,0,0	76	38	1.64469e-06	8.01883e-05	0.333,0.714,0.0	1.0,1.0,1.0	-0.651
ENSG00000168137	SETD5	3	+	9476507	9476566	9476017	9476169	9477411	9477590	3,1,11	6,2,3	51,47,31	0,0,0	76	38	6.98664e-06	0.000300772	0.2,0.2,0.647	1.0,1.0,1.0	-0.651
ENSG00000144136	SLC20A1	2	+	113417963	113418149	113416780	113417339	113420440	113421404	13,8,21	14,11,12	86,80,94	0,0,0	76	38	0	0	0.317,0.267,0.467	1.0,1.0,1.0	-0.65
ENSG00000112029	FBXO5	6	-	153294180	153294271	153293406	153293589	153296041	153296756	57,41,71	43,51,62	100,73,75	0,0,0	76	38	0	0	0.399,0.287,0.364	1.0,1.0,1.0	-0.65
ENSG00000137502	RAB30	11	-	82705080	82705164	82698628	82698812	82708265	82708366	10,4,2	5,4,6	58,47,47	1,1,0	76	38	7.10682e-09	5.08066e-07	0.5,0.333,0.143	0.967,0.959,1.0	-0.65
ENSG00000164855	TMEM184A	7	-	1589489	1589581	1588154	1588324	1589758	1589834	1,3,1	2,1,3	33,44,26	0,1,1	76	38	8.16424e-05	0.00272157	0.2,0.6,0.143	1.0,0.957,0.929	-0.648
ENSG00000133997	MED6	14	-	71059596	71059726	71057982	71058098	71060012	71060095	1,2,2	1,2,2	62,53,57	2,0,0	76	38	1.19559e-06	5.94488e-05	0.333,0.333,0.333	0.939,1.0,1.0	-0.647
ENSG00000004961	HCCS	X	+	11139026	11139113	11136620	11136740	11139731	11139999	11,11,9	9,6,17	104,84,93	0,0,0	76	38	0	0	0.379,0.478,0.209	1.0,1.0,1.0	-0.645
ENSG00000176142	TMEM39A	3	-	119153608	119153729	119148346	119151061	119155637	119155825	3,0,2	5,9,1	19,10,12	0,0,3	76	38	0.000383107	0.00991234	0.231,0.0,0.5	1.0,1.0,0.667	-0.645
ENSG00000103121	CMC2	16	-	81014374	81014484	81009698	81010076	81040338	81040500	28,31,26	40,47,34	91,65,74	1,4,7	76	38	0	0	0.259,0.248,0.277	0.978,0.89,0.841	-0.642
ENSG00000108296	CWC25	17	-	36962549	36962648	36958952	36959114	36963017	36963229	1,3,2	3,1,2	70,81,71	0,0,0	76	38	2.1336e-07	1.20381e-05	0.143,0.6,0.333	1.0,1.0,1.0	-0.641
ENSG00000196756	RP4-564F22.2	20	-	37050738	37050888	37049652	37049745	37055061	37055146	23,27,24	19,29,35	27,27,20	2,0,0	76	38	1.2127e-12	1.31629e-10	0.377,0.318,0.255	0.871,1.0,1.0	-0.64
ENSG00000076053	RBM7	11	+	114273549	114273637	114272419	114272582	114276427	114276521	2,1,2	1,1,3	51,47,50	0,0,0	76	38	1.09092e-06	5.45489e-05	0.5,0.333,0.25	1.0,1.0,1.0	-0.639
ENSG00000168066	SF1	11	-	64534663	64534723	64534371	64534551	64535042	64535316	25,37,32	24,27,31	61,59,62	0,0,0	76	38	0	0	0.342,0.407,0.34	1.0,1.0,1.0	-0.637
ENSG00000177888	ZBTB41	1	-	197159891	197159961	197157421	197157569	197160821	197161029	1,3,1	1,2,1	47,39,37	0,0,0	76	38	1.21167e-05	0.000495268	0.333,0.429,0.333	1.0,1.0,1.0	-0.635
ENSG00000005483	MLL5	7	+	104714065	104714124	104654625	104654982	104715089	104715262	8,16,14	11,8,14	46,35,47	0,0,0	76	38	6.34715e-13	7.01773e-11	0.267,0.5,0.333	1.0,1.0,1.0	-0.633
ENSG00000172819	RARG	12	-	53609429	53609578	53609076	53609218	53613733	53614161	3,1,3	2,1,6	32,25,12	0,0,1	76	38	7.53475e-06	0.000321835	0.429,0.333,0.2	1.0,1.0,0.857	-0.632
ENSG00000058729	RIOK2	5	-	96513435	96513552	96512819	96512995	96514758	96514897	3,3,4	4,3,2	134,89,94	0,0,0	76	38	7.95308e-12	7.97593e-10	0.273,0.333,0.5	1.0,1.0,1.0	-0.631
ENSG00000126814	TRMT5	14	-	61444231	61444356	61442192	61442844	61445948	61446604	1,2,2	1,1,3	67,78,73	0,1,0	76	38	2.33635e-07	1.31404e-05	0.333,0.5,0.25	1.0,0.975,1.0	-0.631
ENSG00000163660	CCNL1	3	-	156867853	156867958	156867624	156867766	156876654	156876764	18,25,30	18,22,21	49,56,22	0,0,0	76	38	0	0	0.333,0.362,0.417	1.0,1.0,1.0	-0.629
ENSG00000166900	STX3	11	+	59554509	59554609	59540683	59540767	59556345	59556420	8,4,4	3,4,9	46,58,34	0,1,0	76	38	1.27771e-08	8.78167e-07	0.571,0.333,0.182	1.0,0.967,1.0	-0.627
ENSG00000085274	MYNN	3	+	169501264	169501348	169500252	169500431	169502409	169502496	1,2,1	1,2,2	18,26,23	2,0,1	76	38	0.000530577	0.012947	0.333,0.333,0.2	0.818,1.0,0.92	-0.624
ENSG00000136108	CKAP2	13	+	53035030	53035109	53030657	53030742	53035192	53036061	3,4,7	6,5,4	64,83,70	3,3,1	76	38	9.55566e-10	7.4934e-08	0.2,0.286,0.467	0.914,0.933,0.972	-0.622
ENSG00000133997	MED6	14	-	71057982	71058098	71051533	71051660	71059596	71059705	2,3,3	4,1,3	63,57,60	0,0,0	76	38	1.21395e-07	7.13184e-06	0.2,0.6,0.333	1.0,1.0,1.0	-0.622
ENSG00000112983	BRD8	5	-	137499775	137499822	137498818	137499033	137500008	137500102	9,9,14	12,9,15	230257243	7,12,10	76	38	0	0	0.273,0.333,0.318	0.943,0.915,0.924	-0.619
ENSG00000133997	MED6	14	-	71059596	71059705	71058004	71058098	71060012	71060095	1,2,3	1,2,2	78,62,76	2,0,0	76	38	4.24204e-07	2.29871e-05	0.333,0.333,0.429	0.951,1.0,1.0	-0.619
ENSG00000166855	CLPX	15	-	65449181	65449270	65448029	65448194	65450083	65450248	4,4,2	3,3,2	69,67,73	1,0,0	76	38	3.66401e-09	2.70635e-07	0.4,0.4,0.333	0.972,1.0,1.0	-0.613
ENSG00000129484	PARP2	14	+	20822967	20823106	20822243	20822406	20824465	20824593	3,4,2	3,2,2	95,116,84	0,0,0	76	38	4.45969e-10	3.66683e-08	0.333,0.5,0.333	1.0,1.0,1.0	-0.611
ENSG00000139112	GABARAPL1	12	+	10370661	10370740	10365434	10365818	10373038	10373430	8,5,1	4,2,4	22,31,26	0,0,0	76	38	0.00051623	0.0126489	0.5,0.556,0.111	1.0,1.0,1.0	-0.611
ENSG00000243207	PPAN-P2RY11	19	+	10218639	10218810	10218479	10218530	10220306	10220383	8,4,9	9,3,5	82,121,81	0,0,0	76	38	1.33227e-15	1.81036e-13	0.308,0.4,0.474	1.0,1.0,1.0	-0.606
ENSG00000173575	CHD2	15	+	93472259	93472321	93470473	93470560	93482807	93482948	7,13,13	6,8,11	107,88,77	0,0,0	76	38	0	0	0.368,0.448,0.371	1.0,1.0,1.0	-0.604
ENSG00000133316	WDR74	11	-	62601089	62601146	62600383	62600603	62601263	62601409	8,10,9	11,3,13	118137154	1,1,1	76	38	1.02141e-14	1.27593e-12	0.267,0.625,0.257	0.983,0.986,0.987	-0.602
ENSG00000165244	ZNF367	9	-	99157104	99157224	99154679	99154818	99160445	99160596	4,1,3	2,2,2	41,87,72	1,1,0	76	38	9.49414e-07	4.80811e-05	0.5,0.2,0.429	0.953,0.978,1.0	-0.601
ENSG00000119707	RBM25	14	+	73572903	73572993	73572566	73572789	73574533	73574607	11,12,8	12,4,10	179185200	0,0,0	76	38	0	0	0.314,0.6,0.286	1.0,1.0,1.0	-0.6
ENSG00000108592	FTSJ3	17	-	61901690	61901771	61901443	61901599	61901996	61902097	33,36,35	15,38,31	298263255	0,0,0	76	38	0	0	0.524,0.321,0.361	1.0,1.0,1.0	-0.598
ENSG00000111641	NOP2	12	-	6670829	6670970	6670096	6670236	6671049	6671137	19,12,34	13,13,20	188182156	1,0,0	76	38	0	0	0.422,0.316,0.459	0.989,1.0,1.0	-0.597
[truncated: 1,973 more rows]
