# Supplementary material
Source: HighWire-hosted journal article supplement (doi:10.1101/rna.065383.117)
Supplement: Supplemental_Table_S5_HelaNucleus_Spliceostatin_Differentially_splicing_events.xlsx [file Supplemental_Table_S5_HelaNucleus_Spliceostatin_Differentially_splicing_events.xlsx]

## Sheet: A3SS
ID	GeneID	geneSymbol	chr	strand	longExonStart_0base	longExonEnd	shortES	shortEE	flankingES	flankingEE	IJC_SAMPLE_1	SJC_SAMPLE_1	IJC_SAMPLE_2	SJC_SAMPLE_2	IncFormLen	SkipFormLen	PValue	FDR	IncLevel1	IncLevel2	IncLevelDifference
5975	ENSG00000139620	KANSL2	12	-	49072818	49073021	49072818	49072933	49073437	49073616	6,7,2	1,1,1	2,0,0	13,17,19	167	86	2.44781e-08	3.80146e-05	0.755,0.783,0.507	0.073,0.0,0.0	0.657
2300	ENSG00000111011	RSRC2	12	-	123003385	123003598	123003385	123003576	123005931	123005975	22,19,39	2,2,0	7,10,6	5,8,4	52	37	4.63392e-06	0.00359824	0.887,0.871,1.0	0.499,0.471,0.516	0.424
1952	ENSG00000100109	TFIP11	22	-	26897865	26898060	26897865	26898018	26899631	26899759	8,5,10	2,0,1	0,3,1	8,6,9	121	86	9.93981e-06	0.00514551	0.74,1.0,0.877	0.0,0.262,0.073	0.761
5318	ENSG00000198563	DDX39B	6	-	31506539	31506716	31506539	31506632	31506923	31507051	11,18,15	35,30,23	5,6,6	48,62,33	163	86	1.64472e-05	0.00638564	0.142,0.24,0.256	0.052,0.049,0.088	0.15
7371	ENSG00000165792	METTL17	14	+	21460250	21460364	21460282	21460364	21458622	21458757	1,0,1	33,46,47	10,8,19	54,59,42	100	75	2.54946e-05	0.00791862	0.022,0.0,0.016	0.122,0.092,0.253	-0.143
5317	ENSG00000198563	DDX39B	6	-	31508098	31508441	31508098	31508311	31509726	31510225	154152142	97,93,77	128142102	136135108	172	86	6.61784e-05	0.0171292	0.443,0.45,0.48	0.32,0.345,0.321	0.129
2298	ENSG00000111011	RSRC2	12	-	123003385	123003598	123003385	123003576	123005050	123005128	21,18,37	2,0,0	9,13,6	6,5,2	86	71	0.000104546	0.0231942	0.897,1.0,1.0	0.553,0.682,0.712	0.317
537	ENSG00000047410	TPR	1	-	186322819	186323012	186322819	186322982	186324541	186324690	9,8,10	60,70,53	8,7,5	131158144	109	86	0.000219045	0.0377974	0.106,0.083,0.13	0.046,0.034,0.027	0.071
5730	ENSG00000133997	MED6	14	-	71063327	71063459	71063327	71063419	71064334	71064494	7,9,2	9,7,6	3,1,2	28,21,18	118	85	0.000196741	0.0377974	0.359,0.481,0.194	0.072,0.033,0.074	0.285

## Sheet: MXE
ID	GeneID	geneSymbol	chr	strand	1stExonStart_0base	1stExonEnd	2ndExonStart_0base	2ndExonEnd	upstreamES	upstreamEE	downstreamES	downstreamEE	IJC_SAMPLE_1	SJC_SAMPLE_1	IJC_SAMPLE_2	SJC_SAMPLE_2	IncFormLen	SkipFormLen	PValue	FDR	IncLevel1	IncLevel2	IncLevelDifference
554	ENSG00000156976	EIF4A2	3	+	186502220	186502266	186503671	186503840	186501365	186501428	186503952	186504062	210206166	36,32,42	97,83,57	81,63,58	48	142	0	0	0.945,0.95,0.921	0.78,0.796,0.744	0.165
555	ENSG00000156976	EIF4A2	3	+	186502217	186502266	186503671	186503840	186501365	186501428	186503952	186504062	70,66,65	36,32,42	17,18,9	81,63,58	54	142	0	0	0.836,0.844,0.803	0.356,0.429,0.29	0.469
930	ENSG00000118515	SGK1	6	-	134494160	134494292	134494411	134494495	134493799	134493912	134494599	134494704	287260254	12,10,16	458467388	137,125,85	154	172	0	0	0.964,0.967,0.947	0.789,0.807,0.836	0.149
553	ENSG00000156976	EIF4A2	3	+	186502220	186502266	186502352	186503840	186501366	186501428	186503952	186507683	210206166	42,43,51	97,83,57	81,63,58	47	141	2.22045e-16	1.46827e-13	0.938,0.935,0.907	0.782,0.798,0.747	0.151
552	ENSG00000156976	EIF4A2	3	+	186502352	186502485	186503671	186503840	186501360	186501428	186503952	186504062	7,11,12	36,32,42	0,0,0	81,63,58	147	147	7.77448e-11	4.1127e-08	0.163,0.256,0.222	0.0,0.0,0.0	0.214
4107	ENSG00000173575	CHD2	15	+	93444396	93444529	93467550	93467782	93443057	93444054	93470473	93470560	2,4,7	32,26,22	44,43,41	31,36,30	166	166	1.19353e-09	5.26147e-07	0.059,0.133,0.241	0.587,0.544,0.577	-0.425
413	ENSG00000131747	TOP2A	17	-	38564743	38564882	38567605	38567707	38563800	38563926	38567896	38568070	86,104,87	7,4,7	272316267	1,1,0	172	172	2.01989e-08	7.6323e-06	0.925,0.963,0.926	0.996,0.997,1.0	-0.06
4131	ENSG00000009954	BAZ1B	7	-	72903523	72903721	72907129	72907251	72884674	72884813	72912826	72913028	32,29,35	5,6,6	109,139,92	0,1,2	172	172	2.78832e-08	9.21889e-06	0.865,0.829,0.854	1.0,0.993,0.979	-0.141
931	ENSG00000118515	SGK1	6	-	134493799	134493912	134494160	134494292	134493330	134493454	134494411	134494495	55,54,57	212179198	164214160	347333277	163	163	1.97292e-07	5.79818e-05	0.206,0.232,0.224	0.321,0.391,0.366	-0.139
1966	ENSG00000142178	SIK1	21	-	44841853	44841917	44845286	44845403	44841517	44841679	44845902	44846072	18,35,30	4,3,5	180209153	130139128	172	114	2.80093e-07	7.40846e-05	0.749,0.885,0.799	0.479,0.499,0.442	0.338
281	ENSG00000163938	GNL3	3	+	52721261	52721399	52722124	52722208	52719935	52720121	52723089	52723222	1,3,10	62,56,75	1,0,0	158182146	172	154	2.44675e-06	0.000539304	0.014,0.046,0.107	0.006,0.0,0.0	0.054
3093	ENSG00000134294	SLC38A2	12	-	46764558	46764640	46764960	46765162	46761049	46761123	46766291	46766554	67,50,53	2,0,8	627619557	5,4,5	153	131	2.41279e-06	0.000539304	0.966,1.0,0.85	0.991,0.993,0.99	-0.053
280	ENSG00000163938	GNL3	3	+	52721261	52721399	52721517	52721631	52720047	52720121	52722124	52722222	1,5,8	78,60,86	1,0,0	170214156	153	153	3.25826e-06	0.000662932	0.013,0.077,0.085	0.006,0.0,0.0	0.056
2969	ENSG00000117461	PIK3R3	1	-	46543186	46543285	46546313	46546422	46531727	46531851	46597518	46597628	0,1,0	2,5,3	17,9,7	0,1,1	172	172	4.86112e-06	0.000918404	0.0,0.167,0.0	1.0,0.9,0.875	-0.869
362	ENSG00000165732	DDX21	10	+	70723046	70723225	70725132	70725250	70719561	70720005	70726773	70726959	3,4,5	102,109,64	0,0,0	196203116	172	172	8.45608e-05	0.0149109	0.029,0.035,0.072	0.0,0.0,0.0	0.045
3481	ENSG00000169045	HNRNPH1	5	-	179046269	179046408	179047892	179048036	179045145	179045324	179048242	179048398	305279247	412327285	447482327	321437274	172	172	0.000101759	0.0168221	0.425,0.46,0.464	0.582,0.524,0.544	-0.1

## Sheet: SkippedExons
ID	GeneID	geneSymbol	chr	strand	exonStart_0base	exonEnd	upstreamES	upstreamEE	downstreamES	downstreamEE	IJC_SAMPLE_1	SJC_SAMPLE_1	IJC_SAMPLE_2	SJC_SAMPLE_2	IncFormLen	SkipFormLen	PValue	FDR	IncLevel1	IncLevel2	IncLevelDifference
11509	ENSG00000215301	DDX3X	X	+	41198288	41198336	41193414	41193550	41200736	41200869	112,86,74	60,44,53	185195172	0,2,0	82	86	0	0	0.662,0.672,0.594	1.0,0.99,1.0	-0.354
11511	ENSG00000215301	DDX3X	X	+	41196660	41196718	41192650	41193550	41200736	41200869	81,64,61	60,44,53	156145118	0,2,0	102	86	0	0	0.532,0.551,0.492	1.0,0.984,1.0	-0.47
42748	ENSG00000173120	KDM2A	11	+	66888704	66888829	66887157	66887520	66947549	66947688	35,20,38	14,14,13	181180136	2,0,0	172	86	0	0	0.556,0.417,0.594	0.978,1.0,1.0	-0.47
6447	ENSG00000156976	EIF4A2	3	+	186504290	186504434	186503952	186504062	186504915	186505053	68,72,66	28,19,33	237222221	0,0,0	172	86	0	0	0.548,0.655,0.5	1.0,1.0,1.0	-0.432
45883	ENSG00000173575	CHD2	15	+	93444396	93444529	93443057	93444054	93467550	93467782	9,14,14	10,14,12	100130108	9,4,10	172	86	1.55431e-15	6.22657e-12	0.31,0.333,0.368	0.847,0.942,0.844	-0.541
29658	ENSG00000133302	ANKRD32	5	+	93964796	93964872	93964515	93964629	93966207	93966448	24,21,25	11,8,15	85,102,74	2,1,1	138	86	8.77076e-15	2.92797e-11	0.576,0.621,0.509	0.964,0.985,0.979	-0.407
16439	ENSG00000114019	AMOTL2	3	-	134084658	134084751	134080353	134080649	134085124	134085269	34,30,23	12,14,10	81,72,51	0,0,0	172	86	1.38778e-14	3.97103e-11	0.586,0.517,0.535	1.0,1.0,1.0	-0.454
7265	ENSG00000137574	TGS1	8	+	56695306	56695371	56685700	56686278	56698277	56698450	18,16,20	7,7,5	147155129	0,1,1	116	86	1.65423e-14	4.14178e-11	0.656,0.629,0.748	1.0,0.991,0.99	-0.316
4932	ENSG00000131747	TOP2A	17	-	38569446	38569544	38569010	38569223	38569731	38569877	127111161	8,7,8	389415350	0,0,0	172	86	5.92193e-12	1.31796e-08	0.888,0.888,0.91	1.0,1.0,1.0	-0.105
24335	ENSG00000115963	RND3	2	-	151343207	151343295	151331388	151331498	151343781	151344181	6,7,4	4,12,4	32,51,37	0,0,1	162	86	3.19107e-11	6.39171e-08	0.443,0.236,0.347	1.0,1.0,0.952	-0.642
43540	ENSG00000100852	ARHGAP5	14	+	32586348	32586493	32559707	32563592	32615468	32615546	8,9,11	9,5,6	62,66,50	3,0,0	157	71	1.03853e-10	1.73349e-07	0.287,0.449,0.453	0.903,1.0,1.0	-0.571
9930	ENSG00000062194	GPBP1	5	+	56509900	56510020	56471274	56472227	56526672	56526796	4,2,9	11,11,11	62,67,61	14,4,7	172	86	9.58786e-11	1.73349e-07	0.154,0.083,0.29	0.689,0.893,0.813	-0.623
43695	ENSG00000163659	TIPARP	3	+	156395445	156396403	156392130	156392585	156411808	156411977	201220217	20,28,23	131113104	0,0,0	172	86	3.14873e-10	4.85146e-07	0.834,0.797,0.825	1.0,1.0,1.0	-0.181
29516	ENSG00000166598	HSP90B1	12	+	104331472	104331584	104327733	104328065	104332117	104332237	725821945	17,14,29	843939715	3,2,1	172	86	5.08967e-10	7.28186e-07	0.955,0.967,0.942	0.993,0.996,0.997	-0.041
16939	ENSG00000135046	ANXA1	9	+	75778391	75778448	75777697	75777777	75780031	75780125	215206199	8,18,12	227289192	0,0,0	87	73	6.1164e-10	8.16744e-07	0.958,0.906,0.933	1.0,1.0,1.0	-0.068
5951	ENSG00000108055	SMC3	10	+	112342319	112342400	112341680	112341856	112343141	112343306	43,42,45	5,16,8	148,125,93	1,1,1	148	86	7.93282e-10	9.93089e-07	0.833,0.604,0.766	0.989,0.986,0.982	-0.251
43544	ENSG00000100852	ARHGAP5	14	+	32586345	32586493	32559707	32563592	32615468	32615546	25,21,29	9,5,6	99,109,88	3,0,0	157	71	1.32462e-09	1.56072e-06	0.557,0.655,0.686	0.937,1.0,1.0	-0.346
45901	ENSG00000173575	CHD2	15	+	93480747	93480855	93470473	93470560	93482807	93482948	6,7,4	4,8,8	40,57,41	1,3,3	166	80	3.61562e-09	4.02338e-06	0.42,0.297,0.194	0.951,0.902,0.868	-0.603
35520	ENSG00000137955	RABGGTB	1	+	76254843	76255041	76252385	76253289	76257145	76257256	48,28,48	6,7,7	110,98,95	0,0,0	172	86	7.44295e-09	7.84644e-06	0.8,0.667,0.774	1.0,1.0,1.0	-0.253
22366	ENSG00000142178	SIK1	21	-	44841853	44841917	44841517	44841679	44845286	44845403	7,8,10	1,2,2	201186173	0,0,0	114	86	1.49124e-08	1.49347e-05	0.841,0.751,0.79	1.0,1.0,1.0	-0.206
44335	ENSG00000177200	CHD9	16	+	53256555	53256667	53243393	53243725	53260277	53260424	18,10,17	5,3,3	115134126	1,1,1	172	86	1.65068e-08	1.57443e-05	0.643,0.625,0.739	0.983,0.985,0.984	-0.315
4933	ENSG00000131747	TOP2A	17	-	38564218	38564376	38563800	38563926	38564743	38564888	138108128	5,4,7	402498359	1,1,0	172	86	2.66689e-08	2.42808e-05	0.932,0.931,0.901	0.995,0.996,1.0	-0.076
21859	ENSG00000164045	CDC25A	3	-	48218860	48218932	48215773	48215947	48219343	48219478	5,9,6	7,4,5	39,27,32	0,0,0	130	86	3.22317e-08	2.80696e-05	0.321,0.598,0.443	1.0,1.0,1.0	-0.546
47721	ENSG00000100644	HIF1A	14	+	62188456	62188541	62188226	62188372	62193423	62193536	232198179	9,5,9	327351303	0,0,0	156	86	4.93736e-08	4.12064e-05	0.934,0.956,0.916	1.0,1.0,1.0	-0.065
6453	ENSG00000156976	EIF4A2	3	+	186506098	186506205	186505591	186505671	186506913	186507670	20,19,11	22,14,22	79,70,60	14,19,13	159	73	5.63414e-08	4.51407e-05	0.294,0.384,0.187	0.722,0.628,0.679	-0.388
32001	ENSG00000168066	SF1	11	-	64540901	64540977	64537727	64537880	64543969	64544098	24,33,22	15,10,6	43,40,40	1,0,0	138	86	1.00677e-07	7.75604e-05	0.499,0.673,0.696	0.964,1.0,1.0	-0.365
23039	ENSG00000189091	SF3B3	16	+	70566381	70566523	70564647	70564820	70572225	70572363	73,55,55	7,5,6	127,141,94	0,0,0	172	86	2.0797e-07	0.000154283	0.839,0.846,0.821	1.0,1.0,1.0	-0.165
24105	ENSG00000108256	NUFIP2	17	-	27594515	27594548	27582854	27591609	27613009	27614734	1,2,1	1,3,2	32,25,27	0,0,0	52	86	2.37371e-07	0.000169805	0.623,0.524,0.453	1.0,1.0,1.0	-0.467
10754	ENSG00000072501	SMC1A	X	-	53441706	53441819	53440181	53440385	53449440	53449617	147,134,89	3,6,2	213204155	32,30,22	172	86	3.62732e-07	0.000250535	0.961,0.918,0.957	0.769,0.773,0.779	0.172
6454	ENSG00000156976	EIF4A2	3	+	186506098	186506209	186505591	186505671	186506913	186507080	18,26,23	22,14,22	98,79,62	14,19,13	159	73	5.29267e-07	0.000353374	0.273,0.46,0.324	0.763,0.656,0.686	-0.349
13858	ENSG00000112200	ZNF451	6	+	56955608	56955692	56954910	56955072	56963858	56963939	7,7,6	3,3,1	59,80,77	0,0,0	142	74	5.59765e-07	0.000361681	0.549,0.549,0.758	1.0,1.0,1.0	-0.381
46138	ENSG00000009954	BAZ1B	7	-	72891197	72892899	72884674	72884813	72903523	72903721	42,43,31	5,6,6	93,133,71	0,0,2	172	86	6.81408e-07	0.000426519	0.808,0.782,0.721	1.0,1.0,0.947	-0.212
33902	ENSG00000113369	ARRDC3	5	-	90672437	90672585	90671327	90671430	90674510	90674592	2,1,2	7,12,14	15,13,14	7,1,4	161	75	8.42085e-07	0.00051112	0.117,0.037,0.062	0.5,0.858,0.62	-0.587
39807	ENSG00000111266	DUSP16	12	-	12653452	12653616	12639961	12640121	12672795	12672934	1,1,1	3,6,6	12,26,17	2,4,0	172	86	9.89876e-07	0.000568399	0.143,0.077,0.077	0.75,0.765,1.0	-0.739
45896	ENSG00000173575	CHD2	15	+	93472259	93472321	93470473	93470560	93482807	93482948	3,1,0	4,8,8	21,17,16	1,3,3	104	80	9.93209e-07	0.000568399	0.366,0.088,0.0	0.942,0.813,0.804	-0.702
23031	ENSG00000189091	SF3B3	16	+	70569210	70569323	70564647	70564820	70572225	70572363	80,76,92	7,5,6	130150135	0,0,0	172	86	1.11356e-06	0.00061957	0.851,0.884,0.885	1.0,1.0,1.0	-0.127
7369	ENSG00000150938	CRIM1	2	+	36691676	36691798	36669757	36669878	36704031	36704214	95,95,83	0,2,3	144152109	24,20,14	172	86	1.14685e-06	0.000620847	1.0,0.96,0.933	0.75,0.792,0.796	0.185
11158	ENSG00000112983	BRD8	5	-	137506520	137506601	137506033	137506098	137506726	137506849	25,24,26	6,1,1	165161139	0,0,0	120	58	1.77015e-06	0.000924446	0.668,0.921,0.926	1.0,1.0,1.0	-0.162
21768	ENSG00000119707	RBM25	14	+	73572903	73572993	73572566	73572789	73574533	73574607	29,37,28	2,5,2	153,150,98	0,0,0	147	67	1.79997e-06	0.000924446	0.869,0.771,0.865	1.0,1.0,1.0	-0.165
21858	ENSG00000164045	CDC25A	3	-	48207320	48207383	48207125	48207224	48209335	48209434	2,3,0	2,3,1	54,60,47	0,0,1	112	86	2.04174e-06	0.00101505	0.434,0.434,0.0	1.0,1.0,0.973	-0.702
39661	ENSG00000100888	CHD8	14	-	21881071	21881155	21878009	21878147	21883732	21883801	18,8,11	4,1,4	80,73,81	1,0,0	130	62	2.07774e-06	0.00101505	0.682,0.792,0.567	0.974,1.0,1.0	-0.311
10911	ENSG00000118515	SGK1	6	-	134494160	134494292	134493799	134493912	134494411	134494495	67,61,70	0,5,3	301339245	0,0,0	163	77	3.57975e-06	0.0017072	1.0,0.852,0.917	1.0,1.0,1.0	-0.077
20961	ENSG00000168137	SETD5	3	+	9476507	9476566	9476017	9476169	9477411	9477590	1,1,4	8,4,1	59,56,45	0,3,1	104	86	4.10895e-06	0.00191401	0.094,0.171,0.768	1.0,0.939,0.974	-0.627
40951	ENSG00000135679	MDM2	12	+	69230451	69230529	69229608	69229764	69233053	69233629	15,9,12	2,1,2	111131101	0,0,0	142	86	4.25917e-06	0.00193889	0.82,0.845,0.784	1.0,1.0,1.0	-0.184
19360	ENSG00000134318	ROCK2	2	-	11362208	11362300	11361323	11361483	11364447	11364586	137,136,99	4,5,2	446524460	2,1,0	170	86	6.55512e-06	0.00285538	0.945,0.932,0.962	0.991,0.996,1.0	-0.049
415	ENSG00000189046	ALKBH2	12	-	109527813	109528012	109526001	109526317	109530311	109530735	1,3,3	11,5,5	36,34,29	8,11,8	172	86	6.55753e-06	0.00285538	0.043,0.231,0.231	0.692,0.607,0.644	-0.479
12279	ENSG00000096401	CDC5L	6	+	44358004	44358108	44355261	44355605	44360403	44360565	147147132	4,3,9	280280212	0,0,1	172	86	7.93586e-06	0.00331504	0.948,0.961,0.88	1.0,1.0,0.991	-0.067
46884	ENSG00000143384	MCL1	1	-	150550719	150550967	150547031	150549967	150551318	150552066	3,5,3	4,1,0	120142124	0,0,0	172	86	7.94417e-06	0.00331504	0.273,0.714,1.0	1.0,1.0,1.0	-0.338
1799	ENSG00000174197	MGA	15	+	41991060	41991139	41988272	41989221	41991261	41991357	15,8,7	1,1,5	107,94,73	0,0,0	144	86	8.37632e-06	0.00342403	0.9,0.827,0.455	1.0,1.0,1.0	-0.273
42637	ENSG00000101868	POLA1	X	+	24763534	24763659	24761346	24761446	24766427	24766577	160138133	2,3,3	268294243	21,31,22	172	86	1.00989e-05	0.00404563	0.976,0.958,0.957	0.865,0.826,0.847	0.118
13233	ENSG00000137807	KIF23	15	+	69708332	69708402	69706687	69706815	69709721	69709850	7,7,2	3,2,2	48,47,30	0,0,0	126	86	1.07776e-05	0.00415145	0.614,0.705,0.406	1.0,1.0,1.0	-0.425
17953	ENSG00000155545	MIER3	5	-	56234709	56234844	56233404	56233525	56242752	56242898	6,2,3	2,1,1	64,72,50	0,0,0	172	86	1.05838e-05	0.00415145	0.6,0.5,0.6	1.0,1.0,1.0	-0.433
11156	ENSG00000112983	BRD8	5	-	137507049	137507099	137506726	137506849	137513259	137513356	11,11,9	1,3,2	79,71,77	1,0,0	86	86	1.10763e-05	0.00418599	0.917,0.786,0.818	0.987,1.0,1.0	-0.155
25255	ENSG00000146247	PHIP	6	-	79695068	79695145	79692602	79692834	79697925	79698066	35,40,37	3,3,3	129,129,94	0,0,0	140	86	1.44813e-05	0.00537148	0.878,0.891,0.883	1.0,1.0,1.0	-0.116
20350	ENSG00000107937	GTPBP4	10	+	1041868	1041972	1038428	1038599	1042045	1042182	65,68,75	5,2,5	167186152	0,1,0	172	86	1.92403e-05	0.00700696	0.867,0.944,0.882	1.0,0.989,1.0	-0.099
9125	ENSG00000080345	RIF1	2	+	152273320	152273415	152273074	152273202	152276703	152276893	102,83,84	4,1,2	474441397	0,0,0	172	86	1.98252e-05	0.00709105	0.927,0.976,0.955	1.0,1.0,1.0	-0.047
12586	ENSG00000159086	GCFC1	21	-	34123227	34123343	34120809	34121009	34123429	34123529	4,0,5	3,5,2	56,57,40	1,3,2	172	86	2.74984e-05	0.00948521	0.4,0.0,0.556	0.966,0.905,0.909	-0.608
15439	ENSG00000088179	PTPN4	2	+	120567412	120567567	120517795	120517960	120620111	120620219	17,13,11	2,2,1	127,121,87	0,1,0	172	86	2.79254e-05	0.00948521	0.81,0.765,0.846	1.0,0.984,1.0	-0.188
6798	ENSG00000112739	PRPF4B	6	+	4047408	4047482	4044046	4044257	4049249	4049340	15,12,14	4,4,1	57,71,57	0,1,0	132	84	2.79395e-05	0.00948521	0.705,0.656,0.899	1.0,0.978,1.0	-0.239
7753	ENSG00000151532	VTI1A	10	+	114220282	114220341	114207015	114207225	114224305	114224416	17,15,10	2,1,0	149178148	0,0,0	104	86	3.60962e-05	0.0120501	0.875,0.925,1.0	1.0,1.0,1.0	-0.067
30024	ENSG00000198625	MDM4	1	+	204513662	204513812	204511911	204512072	204515924	204516005	4,4,5	3,3,2	61,52,43	4,3,0	160	74	3.70914e-05	0.0121793	0.381,0.381,0.536	0.876,0.889,1.0	-0.489
6347	ENSG00000119787	ATL2	2	-	38537450	38537589	38536520	38536648	38540292	38540385	43,19,19	3,2,3	91,115,78	0,0,0	172	86	3.91667e-05	0.0126534	0.878,0.826,0.76	1.0,1.0,1.0	-0.179
3407	ENSG00000163938	GNL3	3	+	52720784	52720843	52720020	52720121	52721261	52721399	38,32,29	1,3,6	93,86,114	1,0,0	104	86	4.68635e-05	0.0148996	0.969,0.898,0.8	0.987,1.0,1.0	-0.107
35179	ENSG00000134294	SLC38A2	12	-	46764294	46764410	46761049	46761123	46764558	46764640	74,65,56	2,0,7	655705576	5,4,5	142	56	4.91847e-05	0.0153933	0.936,1.0,0.759	0.981,0.986,0.978	-0.083
6576	ENSG00000166483	WEE1	11	+	9597776	9597840	9597036	9597640	9598033	9598206	6,8,7	2,1,1	63,60,73	0,0,0	114	86	5.01962e-05	0.0154682	0.694,0.858,0.841	1.0,1.0,1.0	-0.202
3168	ENSG00000133226	SRRM1	1	+	24973569	24973699	24973157	24973280	24975349	24975520	1,0,2	30,41,37	10,13,6	29,45,31	172	86	6.02027e-05	0.0182706	0.016,0.0,0.026	0.147,0.126,0.088	-0.106
4532	ENSG00000110422	HIPK3	11	+	33350055	33350179	33307958	33309057	33360302	33360389	17,9,6	3,3,3	51,50,32	0,0,1	166	80	6.46306e-05	0.0193217	0.732,0.591,0.491	1.0,1.0,0.939	-0.375
40968	ENSG00000067334	DNTTIP2	1	-	94341200	94341339	94338674	94338770	94341823	94343418	49,42,35	2,4,3	102,137,94	0,0,0	172	86	6.70847e-05	0.0197604	0.925,0.84,0.854	1.0,1.0,1.0	-0.127
34213	ENSG00000117461	PIK3R3	1	-	46532582	46532763	46531725	46531851	46543186	46543285	3,1,4	2,2,1	49,52,32	0,1,0	172	86	7.56624e-05	0.0216695	0.429,0.2,0.667	1.0,0.963,1.0	-0.556
35505	ENSG00000124275	MTRR	5	+	7873485	7873639	7870882	7871036	7875370	7875488	48,41,39	3,1,1	69,72,67	26,15,13	172	86	7.68116e-05	0.0216695	0.889,0.953,0.951	0.57,0.706,0.72	0.266
38363	ENSG00000170776	AKAP13	15	+	86028940	86028984	85923945	85924029	86064658	86064806	3,1,4	2,3,3	39,34,18	1,3,1	65	77	7.59704e-05	0.0216695	0.64,0.283,0.612	0.979,0.931,0.955	-0.443
43381	ENSG00000143367	TUFT1	1	+	151535060	151535162	151512783	151512902	151536379	151536466	2,1,0	5,6,3	10,12,11	2,1,3	166	80	8.08109e-05	0.0224811	0.162,0.074,0.0	0.707,0.853,0.639	-0.654
33467	ENSG00000205213	LGR4	11	-	27434335	27434407	27406792	27407015	27493664	27494293	14,16,7	3,4,3	44,37,36	0,0,1	130	86	8.44372e-05	0.0231682	0.755,0.726,0.607	1.0,1.0,0.96	-0.291
31430	ENSG00000117318	ID3	1	-	23885425	23885510	23884408	23884906	23885617	23886285	1,3,4	0,1,0	98,121,71	0,0,0	156	86	8.85606e-05	0.0239712	1.0,0.623,1.0	1.0,1.0,1.0	-0.126
10515	ENSG00000163166	IWS1	2	-	128281251	128281367	128262259	128263328	128283750	128284016	45,36,33	4,1,5	168190130	1,3,1	172	86	9.88217e-05	0.026392	0.849,0.947,0.767	0.988,0.969,0.985	-0.126
17184	ENSG00000153187	HNRNPU	1	-	245022576	245022676	245021312	245021576	245023636	245023776	276242246	8,2,5	318412335	0,0,0	172	86	0.000102469	0.0270059	0.945,0.984,0.961	1.0,1.0,1.0	-0.037
35183	ENSG00000134294	SLC38A2	12	-	46756803	46756928	46756276	46756421	46757706	46757786	20,17,14	0,2,1	182175126	0,0,0	159	73	0.000120776	0.0310145	1.0,0.796,0.865	1.0,1.0,1.0	-0.113
7702	ENSG00000058272	PPP1R12A	12	-	80266587	80266718	80239081	80239200	80328474	80328731	27,34,32	4,1,1	138144105	0,0,0	172	86	0.000120402	0.0310145	0.771,0.944,0.941	1.0,1.0,1.0	-0.115
33540	ENSG00000106546	AHR	7	+	17349559	17349747	17338245	17338953	17362124	17362231	20,7,18	3,1,1	74,94,87	0,0,0	172	86	0.000128721	0.0326366	0.769,0.778,0.9	1.0,1.0,1.0	-0.184
19362	ENSG00000134318	ROCK2	2	-	11338806	11338900	11338616	11338711	11341082	11341269	122113115	2,5,1	384446325	0,0,1	172	86	0.000130429	0.0326562	0.968,0.919,0.983	1.0,1.0,0.994	-0.041
7542	ENSG00000013573	DDX11	12	+	31231396	31231471	31226825	31227025	31236746	31236995	16,9,7	3,1,1	52,59,65	0,0,0	136	86	0.000139327	0.0344534	0.771,0.851,0.816	1.0,1.0,1.0	-0.187
35522	ENSG00000137955	RABGGTB	1	+	76256969	76257022	76254843	76255041	76257145	76257256	52,41,36	1,5,3	99,91,101	0,0,0	92	86	0.000154429	0.0377222	0.98,0.885,0.918	1.0,1.0,1.0	-0.072
47147	ENSG00000149187	CELF1	11	-	47505004	47505084	47504246	47504408	47505940	47506075	189162172	4,10,7	545553398	6,5,6	146	86	0.000157223	0.0379418	0.965,0.905,0.935	0.982,0.985,0.975	-0.046
35185	ENSG00000134294	SLC38A2	12	-	46757508	46757609	46756276	46756421	46757706	46757786	21,22,14	0,2,1	175180135	0,0,0	159	73	0.000163471	0.0389802	1.0,0.835,0.865	1.0,1.0,1.0	-0.1
38356	ENSG00000170776	AKAP13	15	+	86269640	86269717	86266302	86266551	86270296	86270478	4,6,7	0,1,1	99,91,85	0,0,0	140	86	0.000179259	0.0417507	1.0,0.787,0.811	1.0,1.0,1.0	-0.134
9113	ENSG00000080345	RIF1	2	+	152279463	152279556	152276703	152276893	152285297	152285436	30,30,27	3,1,2	186191130	1,1,1	172	86	0.000178388	0.0417507	0.833,0.938,0.871	0.989,0.99,0.985	-0.107
35180	ENSG00000134294	SLC38A2	12	-	46756066	46756164	46754900	46754992	46756276	46756687	38,34,40	3,0,0	347339248	0,0,0	171	85	0.000182694	0.0420617	0.863,1.0,1.0	1.0,1.0,1.0	-0.046
24909	ENSG00000112701	SENP6	6	+	76385150	76385184	76380268	76380436	76385575	76385770	2,4,2	1,2,3	15,27,8	0,0,0	54	86	0.000199308	0.0436644	0.761,0.761,0.515	1.0,1.0,1.0	-0.321
27105	ENSG00000177084	POLE	12	-	133253948	133254029	133253131	133253239	133254163	133254305	15,13,13	1,2,1	101,86,75	0,0,0	148	86	0.000192472	0.0436644	0.897,0.791,0.883	1.0,1.0,1.0	-0.143
32775	ENSG00000113712	CSNK1A1	5	-	148929637	148929744	148904607	148904734	148930404	148930960	47,36,37	2,5,1	106,134,91	0,0,0	172	86	0.000199803	0.0436644	0.922,0.783,0.949	1.0,1.0,1.0	-0.115
37193	ENSG00000115919	KYNU	2	+	143638913	143638999	143635232	143635305	143642917	143643105	1,1,0	36,29,42	18,9,14	62,69,58	138	66	0.000200555	0.0436644	0.013,0.016,0.0	0.122,0.059,0.103	-0.085
7547	ENSG00000013573	DDX11	12	+	31231323	31231471	31226778	31227025	31236746	31236995	17,11,12	3,1,1	70,72,74	0,0,0	172	86	0.000196121	0.0436644	0.739,0.846,0.857	1.0,1.0,1.0	-0.186
38948	ENSG00000170759	KIF5B	10	-	32337391	32337479	32329311	32329385	32344775	32345359	168167143	7,3,2	354397341	0,1,2	143	67	0.000203176	0.0437593	0.918,0.963,0.971	1.0,0.995,0.988	-0.044
19619	ENSG00000132640	BTBD3	20	+	11899733	11899824	11898981	11899249	11900365	11900484	6,4,6	1,1,1	59,88,63	0,0,1	168	86	0.000211893	0.0451512	0.754,0.672,0.754	1.0,1.0,0.97	-0.263
46444	ENSG00000119471	HSDL2	9	+	115179120	115179224	115171186	115171301	115181139	115181238	48,59,50	6,2,10	71,58,51	27,20,26	172	86	0.000215878	0.0455161	0.8,0.937,0.714	0.568,0.592,0.495	0.265
13294	ENSG00000198160	MIER1	1	+	67438579	67438674	67437337	67437419	67442277	67442405	7,7,5	0,1,1	145157101	1,0,0	161	75	0.000227	0.0473627	1.0,0.765,0.7	0.985,1.0,1.0	-0.173
31797	ENSG00000135829	DHX9	1	+	182824711	182824848	182823175	182823313	182825666	182825707	2,6,2	112114118	22,11,14	145143130	120	34	0.000231788	0.047863	0.005,0.015,0.005	0.041,0.021,0.03	-0.022

## Sheet: Intron retention
ID	GeneID	geneSymbol	chr	strand	riExonStart_0base	riExonEnd	upstreamES	upstreamEE	downstreamES	downstreamEE	ID	IJC_SAMPLE_1	SJC_SAMPLE_1	IJC_SAMPLE_2	SJC_SAMPLE_2	IncFormLen	SkipFormLen	PValue	FDR	IncLevel1	IncLevel2	IncLevelDifference
1538	ENSG00000118515	SGK1	6	-	134494411	134494704	134494411	134494495	134494599	134494704	1538	258219279	287255251	85,80,82	458467388	163	77	0	0	0.298,0.289,0.344	0.081,0.075,0.091	0.228
1539	ENSG00000118515	SGK1	6	-	134495648	134495999	134495648	134495724	134495869	134495999	1539	723733867	14,8,10	122183136	41,56,35	155	69	0	0	0.958,0.976,0.975	0.57,0.593,0.634	0.371
2516	ENSG00000149273	RPS3	11	+	75112683	75113490	75112683	75112777	75113395	75113490	2516	132126130	105010511032	60,46,60	134516171410	172	86	0	0	0.059,0.057,0.059	0.022,0.014,0.021	0.039
2910	ENSG00000100906	NFKBIA	14	-	35871599	35872065	35871599	35871869	35871976	35872065	2910	51,38,47	4,3,5	8,5,7	24,22,18	168	82	0	0	0.862,0.861,0.821	0.14,0.1,0.16	0.715
489	ENSG00000163938	GNL3	3	+	52724607	52725087	52724607	52724720	52724960	52725087	489	93,93,93	36,29,45	36,31,39	80,85,88	172	86	0	0	0.564,0.616,0.508	0.184,0.154,0.181	0.39
4900	ENSG00000152332	UHMK1	1	+	162469744	162470894	162469744	162470037	162470702	162470894	4900	28,34,45	29,31,18	11,14,8	115,134,88	172	86	0	0	0.326,0.354,0.556	0.046,0.05,0.043	0.366
5576	ENSG00000110321	EIF4G2	11	-	10825026	10825597	10825026	10825137	10825445	10825597	5576	121113151	117110108	58,61,55	170198158	172	86	0	0	0.341,0.339,0.411	0.146,0.133,0.148	0.221
5663	ENSG00000251022	RP11-163O17.1	4	-	83821229	83821719	83821229	83821376	83821486	83821719	5663	175199189	3,7,7	51,43,36	27,26,19	172	86	0	0	0.967,0.934,0.931	0.486,0.453,0.486	0.469
824	ENSG00000234741	GAS5	1	-	173834366	173834685	173834366	173834420	173834608	173834685	824	8187581007	5,8,2	246279253	35,30,31	117	31	0	0	0.977,0.962,0.993	0.651,0.711,0.684	0.295
925	ENSG00000156976	EIF4A2	3	+	186502352	186503840	186502352	186502485	186503671	186503840	925	522504514	2,1,4	237186178	12,21,16	172	86	0	0	0.992,0.996,0.985	0.908,0.816,0.848	0.134
515	ENSG00000047410	TPR	1	-	186310383	186312605	186310383	186310521	186312457	186312605	515	69,49,56	107,99,92	29,33,37	207228206	172	86	6.66134e-16	1.02221e-13	0.244,0.198,0.233	0.065,0.067,0.082	0.154
100	ENSG00000148926	ADM	11	+	10327226	10327645	10327226	10327345	10327495	10327645	100	28,36,26	5,3,4	10,10,6	22,23,21	172	86	1.55431e-15	2.1864e-13	0.737,0.857,0.765	0.185,0.179,0.125	0.623
1537	ENSG00000118515	SGK1	6	-	134491963	134492316	134491963	134492053	134492160	134492316	1537	18,21,23	18,9,7	5,6,5	64,76,43	169	83	8.65974e-15	1.12443e-12	0.329,0.534,0.617	0.037,0.037,0.054	0.451
3957	ENSG00000132341	RAN	12	+	131357128	131357465	131357128	131357174	131357380	131357465	3957	74,52,71	158149128	15,33,22	184234150	117	31	2.65343e-14	3.19928e-12	0.11,0.085,0.128	0.021,0.036,0.037	0.076
9	ENSG00000166012	TAF1D	11	-	93469859	93470405	93469859	93469917	93470229	93470405	9	127116139	7,8,7	90,82,62	28,37,23	137	51	1.04361e-13	1.17441e-11	0.871,0.844,0.881	0.545,0.452,0.501	0.366
1043	ENSG00000145632	PLK2	5	-	57753910	57754355	57753910	57753998	57754225	57754355	1043	156137168	71,67,82	36,46,47	65,82,54	167	81	2.33225e-12	2.46052e-10	0.516,0.498,0.498	0.212,0.214,0.297	0.263
5575	ENSG00000110321	EIF4G2	11	-	10825833	10826562	10825833	10825965	10826459	10826562	5575	79,72,69	123108101	40,49,35	184209138	172	86	2.02353e-11	2.00924e-09	0.243,0.25,0.255	0.098,0.105,0.113	0.144
2689	ENSG00000204256	BRD2	6	+	32944338	32945347	32944338	32944713	32945218	32945347	2689	22,13,18	2,5,2	17,7,9	41,34,32	172	86	7.66307e-11	7.00419e-09	0.846,0.565,0.818	0.172,0.093,0.123	0.614
5159	ENSG00000169045	HNRNPH1	5	-	179050037	179051670	179050037	179050165	179050636	179051670	5159	76,48,40	70,58,36	40,35,15	109,124,62	172	86	7.88386e-11	7.00419e-09	0.352,0.293,0.357	0.155,0.124,0.108	0.205
272	ENSG00000013441	CLK1	2	-	201721613	201722607	201721613	201721708	201722440	201722607	272	10,5,4	1,0,0	5,5,3	26,31,18	172	86	1.92234e-10	1.62246e-08	0.833,1.0,1.0	0.088,0.075,0.077	0.864
832	ENSG00000234741	GAS5	1	-	173833394	173834420	173833394	173833842	173834366	173834420	832	10719751248	3,9,5	282312306	7,14,11	133	47	2.51645e-10	2.02275e-08	0.992,0.975,0.989	0.934,0.887,0.908	0.076
1337	ENSG00000197989	SNHG12	1	-	28906044	28907158	28906044	28906493	28907071	28907158	1337	127115142	4,1,5	118,103,83	28,16,17	166	80	2.99253e-10	2.29608e-08	0.939,0.982,0.932	0.67,0.756,0.702	0.242
6051	ENSG00000203875	SNHG5	6	-	86387512	86387750	86387512	86387593	86387671	86387750	6051	148172189	4,3,1	62,40,23	9,8,8	116	60	9.3469e-10	6.85981e-08	0.95,0.967,0.99	0.781,0.721,0.598	0.269
1654	ENSG00000140319	SRP14	15	-	40330482	40331149	40330482	40330595	40331076	40331149	1654	25,19,15	105119101	4,6,5	170195119	152	66	1.2557e-09	8.83178e-08	0.094,0.065,0.061	0.01,0.013,0.018	0.06
987	ENSG00000112739	PRPF4B	6	+	4056554	4057421	4056554	4056669	4057269	4057421	987	34,21,31	14,14,11	26,24,20	57,69,30	172	86	1.67811e-08	1.13306e-06	0.548,0.429,0.585	0.186,0.148,0.25	0.326
1691	ENSG00000148303	RPL7A	9	+	136217094	136217582	136217094	136217174	136217451	136217582	1691	77,66,75	220183209	37,33,38	288264175	159	73	1.86796e-08	1.21274e-06	0.138,0.142,0.141	0.056,0.054,0.091	0.073
5805	ENSG00000169908	TM4SF1	3	-	149093229	149093556	149093229	149093375	149093466	149093556	5805	84,86,91	7,9,0	20,26,13	11,12,6	165	83	2.30334e-08	1.44001e-06	0.858,0.828,1.0	0.478,0.522,0.522	0.388
618	ENSG00000171453	POLR1C	6	+	43487443	43488165	43487443	43487923	43488012	43488165	618	14,11,8	3,5,7	16,13,10	61,72,59	164	86	3.47031e-08	2.0921e-06	0.71,0.536,0.375	0.121,0.086,0.082	0.444
5106	ENSG00000175061	C17orf76-AS1	17	+	16342640	16343567	16342640	16343017	16343498	16343567	5106	9439311199	38,35,30	793845789	53,76,58	148	62	3.91988e-08	2.24e-06	0.912,0.918,0.944	0.862,0.823,0.851	0.079
6057	ENSG00000075624	ACTB	7	-	5567911	5569031	5567911	5568350	5568791	5569031	6057	19,15,7	248263215	65,46,39	311345239	172	86	3.98105e-08	2.24e-06	0.037,0.028,0.016	0.095,0.063,0.075	-0.051
4809	ENSG00000142541	RPL13A	19	+	49993488	49993833	49993488	49993554	49993731	49993833	4809	112116152	37,42,27	72,74,61	60,70,54	145	59	4.49461e-08	2.43786e-06	0.552,0.529,0.696	0.328,0.301,0.315	0.278
6287	ENSG00000175166	PSMD2	3	+	184021107	184021537	184021107	184021254	184021430	184021537	6287	13,17,8	83,81,44	3,3,1	92,140,88	172	86	4.62154e-08	2.43786e-06	0.073,0.095,0.083	0.016,0.011,0.006	0.073
5797	ENSG00000036549	ZZZ3	1	-	78045211	78046754	78045211	78045313	78046682	78046754	5797	14,18,16	14,13,11	39,33,20	91,105,96	151	65	5.47998e-08	2.80309e-06	0.301,0.373,0.385	0.156,0.119,0.082	0.234
443	ENSG00000128272	ATF4	22	+	39916568	39917676	39916568	39916756	39917358	39917676	443	24,25,37	3,3,3	38,31,32	23,29,19	172	86	3.33098e-07	1.65373e-05	0.8,0.806,0.86	0.452,0.348,0.457	0.403
801	ENSG00000149480	MTA2	11	-	62364787	62365184	62364787	62364887	62365081	62365184	801	44,34,39	14,14,6	24,22,35	59,44,28	172	86	7.07968e-07	3.41443e-05	0.611,0.548,0.765	0.169,0.2,0.385	0.39
4807	ENSG00000142541	RPL13A	19	+	49993106	49993554	49993106	49993179	49993488	49993554	4807	42,51,30	89,107,74	32,35,18	187,159,98	125	39	1.94059e-06	9.09923e-05	0.128,0.129,0.112	0.051,0.064,0.054	0.067
692	ENSG00000162191	UBXN1	11	-	62445810	62446073	62445810	62445880	62445966	62446073	692	18,25,26	16,18,12	9,9,5	24,34,16	135	63	3.16726e-06	0.000144495	0.344,0.393,0.503	0.149,0.11,0.127	0.285
1981	ENSG00000111011	RSRC2	12	-	123003385	123005975	123003385	123003576	123005931	123005975	1981	116102135	2,2,0	42,37,42	5,8,4	123	37	3.89945e-06	0.000173218	0.946,0.939,1.0	0.716,0.582,0.76	0.276
619	ENSG00000171453	POLR1C	6	+	43487443	43487923	43487443	43487576	43487803	43487923	619	14,8,8	4,2,3	25,20,17	39,43,31	172	86	4.44101e-06	0.000192216	0.636,0.667,0.571	0.243,0.189,0.215	0.409
127	ENSG00000134107	BHLHE40	3	+	5021646	5022093	5021646	5021716	5021985	5022093	127	9,15,20	0,0,1	4,5,5	9,14,2	149	63	5.16849e-06	0.00021811	1.0,1.0,0.894	0.158,0.131,0.514	0.697
1655	ENSG00000136271	DDX56	7	-	44613181	44613524	44613181	44613343	44613434	44613524	1655	11,17,13	15,18,14	7,3,7	33,32,29	165	83	5.45298e-06	0.000224503	0.269,0.322,0.318	0.096,0.045,0.108	0.22
1175	ENSG00000166508	MCM7	7	-	99696645	99697026	99696645	99696826	99696901	99697026	1175	9,15,11	93,84,77	46,55,48	147152102	136	86	6.31325e-06	0.000253733	0.058,0.101,0.083	0.165,0.186,0.229	-0.113
5500	ENSG00000026025	VIM	10	+	17277167	17278378	17277167	17277388	17277844	17278378	5500	9,9,5	44,41,46	38,20,19	36,42,34	172	86	1.02862e-05	0.000403795	0.093,0.099,0.052	0.345,0.192,0.218	-0.17
6333	ENSG00000123066	MED13L	12	-	116412975	116413543	116412975	116413118	116413319	116413543	6333	8,5,7	3,2,3	8,8,4	25,23,15	172	86	1.32671e-05	0.000508972	0.571,0.556,0.538	0.138,0.148,0.118	0.42
1622	ENSG00000132424	PNISR	6	-	99862447	99864304	99862447	99862566	99864224	99864304	1622	7,5,12	8,5,13	12,8,11	55,50,43	159	73	1.55541e-05	0.000570769	0.287,0.315,0.298	0.091,0.068,0.105	0.212
2609	ENSG00000100664	EIF5	14	+	103805508	103806140	103805508	103805670	103805975	103806140	2609	12,22,29	7,9,12	40,39,25	55,50,45	172	86	1.5225e-05	0.000570769	0.462,0.55,0.547	0.267,0.281,0.217	0.265
3772	ENSG00000119760	SUPT7L	2	-	27883850	27885148	27883850	27884255	27885045	27885148	3772	43,44,49	16,10,10	27,31,30	29,22,26	172	86	1.80085e-05	0.000646774	0.573,0.688,0.71	0.318,0.413,0.366	0.291
3204	ENSG00000085978	ATG16L1	2	+	234198499	234198999	234198499	234198620	234198893	234198999	3204	7,6,9	1,0,1	5,9,9	10,18,12	172	86	2.78894e-05	0.000980777	0.778,1.0,0.818	0.2,0.2,0.273	0.641
4248	ENSG00000156482	RPL30	8	-	99057170	99057627	99057170	99057316	99057574	99057627	4248	51,32,27	86,81,80	23,21,16	114,116,84	132	46	2.89878e-05	0.000998599	0.171,0.121,0.105	0.066,0.059,0.062	0.07
4216	ENSG00000153914	SREK1	5	+	65458241	65459750	65458241	65458420	65459619	65459750	4216	15,8,14	8,8,10	7,13,3	33,28,17	172	86	3.01389e-05	0.00101749	0.484,0.333,0.412	0.096,0.188,0.081	0.288
1103	ENSG00000204628	GNB2L1	5	-	180668491	180669345	180668491	180668639	180669173	180669345	1103	66,83,88	31,20,18	47,46,46	37,39,39	172	86	3.23355e-05	0.00107024	0.516,0.675,0.71	0.388,0.371,0.371	0.257
2956	ENSG00000188846	RPL14	3	+	40502897	40503152	40502897	40502997	40503098	40503152	2956	32,23,29	113,129,97	13,21,9	158167102	133	47	3.67262e-05	0.00119219	0.091,0.059,0.096	0.028,0.043,0.03	0.048
2850	ENSG00000119707	RBM25	14	+	73577538	73578510	73577538	73577863	73578235	73578510	2850	13,10,10	12,6,10	8,8,10	37,37,22	172	86	4.03437e-05	0.00128491	0.351,0.455,0.333	0.098,0.098,0.185	0.253
3341	ENSG00000227057	WDR46	6	-	33255924	33256247	33255924	33256012	33256134	33256247	3341	19,11,11	25,11,19	6,7,1	32,26,28	167	81	4.13062e-05	0.0012912	0.269,0.327,0.219	0.083,0.116,0.017	0.2
465	ENSG00000173145	NOC3L	10	-	96116930	96117972	96116930	96117088	96117839	96117972	465	9,7,12	22,21,15	9,10,10	78,80,63	172	86	5.32463e-05	0.00161643	0.17,0.143,0.286	0.055,0.059,0.074	0.137
5189	ENSG00000100650	SRSF5	14	+	70235514	70235968	70235514	70235613	70235898	70235968	5189	95,104,92	36,48,36	130,126,93	122,123,55	149	63	5.36257e-05	0.00161643	0.527,0.478,0.519	0.311,0.302,0.417	0.165
3322	ENSG00000074266	EED	11	+	85974986	85977258	85974986	85975305	85977124	85977258	3322	25,28,19	5,7,10	23,26,10	34,23,26	172	86	5.6592e-05	0.00167592	0.714,0.667,0.487	0.253,0.361,0.161	0.364
4929	ENSG00000152556	PFKM	12	+	48528725	48529166	48528725	48528821	48529073	48529166	4929	1,2,3	55,50,48	11,16,12	48,70,50	172	86	5.86551e-05	0.00170707	0.009,0.02,0.03	0.103,0.103,0.107	-0.085
5013	ENSG00000255717	SNHG1	11	-	62622359	62622688	62622359	62622410	62622604	62622688	5013	181143198	1,2,1	42,32,39	4,3,2	121	35	6.42978e-05	0.00183957	0.981,0.954,0.983	0.752,0.755,0.849	0.187
6238	ENSG00000132286	FXC1	11	+	6502730	6503082	6502730	6502785	6502986	6503082	6238	10,8,7	0,2,1	3,6,1	7,9,9	134	48	0.000111166	0.00312747	1.0,0.589,0.715	0.133,0.193,0.038	0.647
965	ENSG00000109971	HSPA8	11	-	122928959	122929969	122928959	122929192	122929766	122929969	965	56,35,33	6,1,0	153149118	0,0,0	172	86	0.000137115	0.00379427	0.824,0.946,1.0	1.0,1.0,1.0	-0.077
6056	ENSG00000075624	ACTB	7	-	5567634	5568350	5567634	5567816	5567911	5568350	6056	10,8,7	108,126,74	23,35,24	123,169,87	172	86	0.00014534	0.00395699	0.044,0.031,0.045	0.086,0.094,0.121	-0.06
5257	ENSG00000088038	CNOT3	19	+	54647395	54647870	54647395	54647485	54647741	54647870	5257	4,9,4	3,6,4	6,3,5	25,22,15	169	83	0.000183767	0.00492378	0.396,0.424,0.329	0.105,0.063,0.141	0.28
5348	ENSG00000171530	TBCA	5	-	76987065	76989177	76987065	76987323	76989090	76989177	5348	0,3,0	52,58,38	8,12,13	63,80,51	166	80	0.000219594	0.00579178	0.0,0.024,0.0	0.058,0.067,0.109	-0.07
4919	ENSG00000126777	KTN1	14	+	56138283	56138595	56138283	56138373	56138502	56138595	4919	14,13,12	198168170	37,29,26	198194170	169	83	0.000242063	0.00628619	0.034,0.037,0.034	0.084,0.068,0.07	-0.039
3556	ENSG00000130713	EXOSC2	9	+	133572968	133573638	133572968	133573014	133573548	133573638	3556	60,47,39	20,20,18	52,46,53	50,42,39	122	36	0.000249055	0.00636978	0.47,0.409,0.39	0.235,0.244,0.286	0.168
2390	ENSG00000137818	RPLP1	15	+	69745985	69747626	69745985	69746060	69747508	69747626	2390	7,6,12	18,33,18	28,32,16	27,20,15	154	68	0.000292034	0.00724932	0.147,0.074,0.227	0.314,0.414,0.32	-0.2
3693	ENSG00000089053	ANAPC5	12	-	121756079	121756411	121756079	121756227	121756303	121756411	3693	2,3,4	54,50,40	22,19,15	74,79,68	138	86	0.000290073	0.00724932	0.023,0.036,0.059	0.156,0.13,0.121	-0.096
2562	ENSG00000132640	BTBD3	20	+	11898425	11899249	11898425	11898659	11898981	11899249	2562	60,52,50	1,0,0	25,33,16	1,7,5	172	86	0.000336967	0.00824348	0.968,1.0,1.0	0.926,0.702,0.615	0.242
2561	ENSG00000054654	SYNE2	14	+	64489468	64491177	64489468	64489581	64490974	64491177	2561	0,0,1	30,31,22	14,17,15	72,64,56	172	86	0.000345817	0.00833913	0.0,0.0,0.022	0.089,0.117,0.118	-0.101
1647	ENSG00000206560	ANKRD28	3	-	15727508	15727816	15727508	15727626	15727728	15727816	1647	10,11,9	33,42,24	16,9,8	110,117,72	167	81	0.000365007	0.00867791	0.128,0.113,0.154	0.066,0.036,0.051	0.081
5904	ENSG00000119969	HELLS	10	+	96351985	96352271	96351985	96352069	96352151	96352271	5904	8,7,5	21,19,25	7,4,1	63,56,39	141	77	0.000389486	0.00913129	0.172,0.167,0.098	0.057,0.038,0.014	0.109
3183	ENSG00000112096	SOD2	6	-	160100095	160103670	160100095	160100330	160103505	160103670	3183	49,45,50	8,8,8	68,86,65	2,6,0	172	86	0.000422845	0.00964545	0.754,0.738,0.758	0.944,0.878,1.0	-0.191
4669	ENSG00000114021	NIT2	3	+	100064428	100065099	100064428	100064522	100065024	100065099	4669	1,1,0	9,12,9	9,11,11	13,12,7	154	68	0.000418204	0.00964545	0.047,0.035,0.0	0.234,0.288,0.41	-0.283
825	ENSG00000234741	GAS5	1	-	173833038	173833442	173833038	173833213	173833394	173833442	825	370317321	0,0,0	148,82,99	3,1,2	127	41	0.0004315	0.00971162	1.0,1.0,1.0	0.941,0.964,0.941	0.051
2657	ENSG00000163608	C3orf17	3	-	112731580	112732250	112731580	112731658	112732118	112732250	2657	3,4,7	1,2,3	8,3,5	18,13,15	157	71	0.000515378	0.0114468	0.576,0.475,0.513	0.167,0.094,0.131	0.391
5573	ENSG00000110321	EIF4G2	11	-	10821098	10821895	10821098	10821303	10821636	10821895	5573	76,63,118	405409347	77,74,74	533653434	172	86	0.000531968	0.0116618	0.086,0.072,0.145	0.067,0.054,0.079	0.034
3790	ENSG00000111364	DDX55	12	+	124091978	124093376	124091978	124092209	124093226	124093376	3790	33,39,27	12,9,3	20,26,17	25,21,10	172	86	0.000546381	0.0118243	0.579,0.684,0.818	0.286,0.382,0.459	0.318
1173	ENSG00000166508	MCM7	7	-	99696645	99697376	99696645	99697026	99697211	99697376	1173	10,10,5	101,117,77	24,24,41	132174124	172	86	0.000571362	0.0122083	0.047,0.041,0.031	0.083,0.065,0.142	-0.057
2231	ENSG00000113013	HSPA9	5	-	137892462	137893185	137892462	137892555	137893090	137893185	2231	24,33,30	171154155	17,17,13	179205151	172	86	0.000645748	0.0136253	0.066,0.097,0.088	0.045,0.04,0.041	0.042
2372	ENSG00000115053	NCL	2	-	232322976	232323836	232322976	232323100	232323711	232323836	2372	36,42,47	139154110	31,35,21	178228106	172	86	0.00073974	0.0154158	0.115,0.12,0.176	0.08,0.071,0.09	0.057
3952	ENSG00000117616	C1orf63	1	-	25570040	25571792	25570040	25570124	25571640	25571792	3952	32,34,25	4,6,3	72,84,75	4,2,0	163	77	0.000801056	0.0162914	0.791,0.728,0.797	0.895,0.952,1.0	-0.177
4323	ENSG00000145495	2017-03-06	5	+	10400895	10402251	10400895	10400954	10402170	10402251	4323	18,4,11	22,9,14	10,10,9	42,38,35	126	40	0.000793196	0.0162914	0.206,0.124,0.2	0.07,0.077,0.075	0.103
5276	ENSG00000157625	TAB3	X	-	30861082	30864761	30861082	30861166	30864667	30864761	5276	7,5,10	1,1,0	8,1,5	8,10,5	163	77	0.000881082	0.0177055	0.768,0.703,1.0	0.321,0.045,0.321	0.595
4009	ENSG00000124784	RIOK1	6	+	7402835	7403130	7402835	7402948	7403049	7403130	4009	11,7,11	21,19,17	8,7,9	51,53,35	160	74	0.000893482	0.0177435	0.195,0.146,0.23	0.068,0.058,0.106	0.113
4327	ENSG00000157456	CCNB2	15	+	59399520	59399869	59399520	59399649	59399755	59399869	4327	16,13,12	16,13,12	12,8,3	30,22,20	172	86	0.000917062	0.018	0.333,0.333,0.333	0.167,0.154,0.07	0.203
2402	ENSG00000184661	CDCA2	8	+	25317755	25318070	25317755	25317816	25317899	25318070	2402	16,18,11	4,1,5	17,17,14	18,23,16	120	54	0.00106296	0.020624	0.643,0.89,0.497	0.298,0.25,0.283	0.4
920	ENSG00000101444	AHCY	20	-	32878137	32878444	32878137	32878255	32878356	32878444	920	0,0,0	48,46,39	5,7,6	47,73,42	167	81	0.00108315	0.0207767	0.0,0.0,0.0	0.049,0.044,0.065	-0.053
2849	ENSG00000119707	RBM25	14	+	73566374	73570186	73566374	73566458	73569899	73570186	2849	25,21,22	13,12,8	41,41,30	36,56,40	163	77	0.0011251	0.0213389	0.476,0.453,0.565	0.35,0.257,0.262	0.208
2428	ENSG00000105821	DNAJC2	7	-	102962957	102963241	102962957	102963079	102963149	102963241	2428	5,6,8	14,14,17	32,38,28	19,39,18	125	85	0.00127007	0.023821	0.195,0.226,0.242	0.534,0.399,0.514	-0.261
5574	ENSG00000110321	EIF4G2	11	-	10823207	10823756	10823207	10823321	10823595	10823756	5574	11,19,14	76,87,58	7,15,8	130,140,85	172	86	0.0012857	0.023849	0.067,0.098,0.108	0.026,0.051,0.045	0.05
6342	ENSG00000172432	GTPBP2	6	-	43588226	43589904	43588226	43589527	43589739	43589904	6342	7,6,6	3,2,2	17,7,9	24,17,15	172	86	0.0013787	0.0252961	0.538,0.6,0.6	0.262,0.171,0.231	0.358
59	ENSG00000131795	RBM8A	1	+	145508015	145508284	145508015	145508075	145508206	145508284	59	11,4,12	17,24,18	7,6,8	44,64,31	124	38	0.00140921	0.025578	0.165,0.049,0.17	0.046,0.028,0.073	0.079
3357	ENSG00000198960	ARMCX6	X	-	100870109	100871756	100870109	100870750	100871661	100871756	3357	7,2,7	0,0,1	3,5,3	7,8,3	172	86	0.00150677	0.0270577	1.0,1.0,0.778	0.176,0.238,0.333	0.677
600	ENSG00000010704	HFE	6	+	26091068	26091817	26091068	26091332	26091541	26091817	600	0,0,0	21,27,28	6,9,3	33,32,25	172	86	0.00159626	0.028363	0.0,0.0,0.0	0.083,0.123,0.057	-0.088
5367	ENSG00000075415	SLC25A3	12	+	98987402	98987913	98987402	98987518	98987752	98987913	5367	8,16,8	15,10,5	4,4,2	22,11,12	172	86	0.0019731	0.0346937	0.211,0.444,0.444	0.083,0.154,0.077	0.262
2737	ENSG00000160714	UBE2Q1	1	-	154524879	154525296	154524879	154524940	154525211	154525296	2737	7,4,3	5,0,3	0,1,0	13,12,12	132	46	0.00212332	0.0369502	0.328,1.0,0.258	0.0,0.028,0.0	0.519
306	ENSG00000159479	MED8	1	-	43851648	43852341	43851648	43851897	43852259	43852341	306	2,3,7	10,10,14	2,1,1	23,28,23	161	75	0.00221633	0.0381751	0.085,0.123,0.189	0.039,0.016,0.02	0.107
2601	ENSG00000011295	TTC19	17	+	15929853	15932100	15929853	15930016	15930687	15932100	2601	10,10,4	23,11,23	41,37,28	34,29,21	172	86	0.00235945	0.0402298	0.179,0.313,0.08	0.376,0.389,0.4	-0.198
2602	ENSG00000142684	ZNF593	1	+	26496908	26498551	26496908	26496971	26497065	26498551	2602	5,11,6	7,8,5	3,4,3	15,18,8	142	56	0.0024497	0.041351	0.22,0.352,0.321	0.073,0.081,0.129	0.203
4896	ENSG00000106263	EIF3B	7	+	2405951	2406226	2405951	2406083	2406159	2406226	4896	29,15,17	45,42,35	23,18,15	75,85,69	112	60	0.00252216	0.0421526	0.257,0.161,0.206	0.141,0.102,0.104	0.092
3787	ENSG00000111364	DDX55	12	+	124091978	124092209	124091978	124092070	124092146	124092209	3787	19,30,28	0,1,1	26,21,18	7,5,4	107	55	0.00273876	0.0449127	1.0,0.939,0.935	0.656,0.683,0.698	0.279
4878	ENSG00000156508	EEF1A1	6	-	74228654	74229239	74228654	74228951	74229059	74229239	4878	116,92,114	587487605	112114101	827910711	172	86	0.00274052	0.0449127	0.09,0.086,0.086	0.063,0.059,0.066	0.025
792	ENSG00000150316	CWC15	11	-	94704140	94704651	94704140	94704229	94704538	94704651	792	9,21,22	10,3,6	8,1,0	9,12,5	168	82	0.00278794	0.0452505	0.305,0.774,0.642	0.303,0.039,0.0	0.46
1470	ENSG00000089818	NECAP1	12	+	8242531	8242895	8242531	8242632	8242790	8242895	1470	3,2,4	5,4,4	2,3,2	17,24,15	172	86	0.00290482	0.0460861	0.231,0.2,0.333	0.056,0.059,0.063	0.195
694	ENSG00000162191	UBXN1	11	-	62444989	62445304	62444989	62445106	62445252	62445304	694	11,9,16	2,7,6	5,1,5	10,7,9	131	45	0.00292133	0.0460861	0.654,0.306,0.478	0.147,0.047,0.16	0.361
998	ENSG00000167767	KRT80	12	-	52574296	52574747	52574296	52574392	52574686	52574747	998	7,4,2	4,4,2	6,4,8	18,24,16	140	54	0.00290329	0.0460861	0.403,0.278,0.278	0.114,0.06,0.162	0.208
4629	ENSG00000174243	DDX23	12	-	49230351	49230820	49230351	49230577	49230676	49230820	4629	6,9,3	21,28,17	6,3,2	45,44,49	172	86	0.00296677	0.0463696	0.125,0.138,0.081	0.063,0.033,0.02	0.076
1292	ENSG00000101158	TH1L	20	+	57568678	57569294	57568678	57568819	57569164	57569294	1292	0,1,2	16,9,7	13,6,7	17,9,10	172	86	0.00316604	0.04903	0.0,0.053,0.125	0.277,0.25,0.259	-0.203
989	ENSG00000112739	PRPF4B	6	+	4060646	4061381	4060646	4060920	4061248	4061381	989	12,10,15	0,0,2	34,18,21	11,17,11	172	86	0.00324872	0.0498531	1.0,1.0,0.789	0.607,0.346,0.488	0.449
6294	ENSG00000183963	SMTN	22	+	31476435	31476740	31476435	31476555	31476661	31476740	6294	0,2,6	1,1,0	13,2,5	0,1,0	158	72	0.00328245	0.0499168	0.0,0.477,1.0	1.0,0.477,1.0	-0.333

## Sheet: A5SS
ID	GeneID	geneSymbol	chr	strand	longExonStart_0base	longExonEnd	shortES	shortEE	flankingES	flankingEE	IJC_SAMPLE_1	SJC_SAMPLE_1	IJC_SAMPLE_2	SJC_SAMPLE_2	IncFormLen	SkipFormLen	PValue	FDR	IncLevel1	IncLevel2	IncLevelDifference
290	ENSG00000108179	PPIF	10	+	81111242	81111470	81111242	81111339	81112072	81112148	17,21,19	8,7,9	12,16,20	59,53,50	155	69	1.81222e-12	2.04237e-09	0.486,0.572,0.484	0.083,0.118,0.151	0.397
1317	ENSG00000213782	DDX47	12	+	12966279	12966450	12966279	12966388	12967064	12967158	16,14,18	17,19,16	0,0,0	26,22,27	141	86	5.52236e-12	3.11185e-09	0.365,0.31,0.407	0.0,0.0,0.0	0.361
3753	ENSG00000127191	TRAF2	9	+	139794873	139795128	139794873	139794972	139802521	139802683	33,30,21	4,13,1	13,11,16	32,35,27	172	86	2.21818e-08	8.33297e-06	0.805,0.536,0.913	0.169,0.136,0.229	0.573
2830	ENSG00000127184	COX7C	5	+	85915169	85915695	85915169	85915313	85916484	85916583	5,10,12	39,29,29	2,0,0	54,58,40	172	86	2.78564e-07	7.84854e-05	0.06,0.147,0.171	0.018,0.0,0.0	0.12
1500	ENSG00000100519	PSMC6	14	+	53173919	53174247	53173919	53174022	53175026	53175106	39,28,39	236199203	24,29,10	287306237	159	73	2.92363e-05	0.00658986	0.071,0.061,0.081	0.037,0.042,0.019	0.038
1212	ENSG00000148303	RPL7A	9	+	136215072	136215428	136215072	136215101	136215776	136215897	10,14,11	21,30,26	3,3,2	27,33,31	108	22	0.000116848	0.0190281	0.088,0.087,0.079	0.022,0.018,0.013	0.067
3499	ENSG00000142541	RPL13A	19	+	49993106	49993347	49993106	49993179	49993488	49993554	19,21,19	89,107,74	15,15,9	187,159,98	125	39	0.000118187	0.0190281	0.062,0.058,0.074	0.024,0.029,0.028	0.038
4059	ENSG00000100129	EIF3L	22	+	38247286	38247568	38247286	38247497	38251571	38251651	6,4,6	46,67,50	2,0,1	114,87,71	137	73	0.000208926	0.0294325	0.065,0.031,0.06	0.009,0.0,0.007	0.047
3448	ENSG00000003756	RBM5	3	+	50126386	50126490	50126386	50126462	50127814	50127884	3,1,2	2,3,2	1,1,0	20,20,18	67	46	0.000353269	0.0442372	0.507,0.186,0.407	0.033,0.033,0.0	0.345
1224	ENSG00000127483	HP1BP3	1	-	21106837	21107033	21106842	21107033	21106304	21106404	40,35,43	1,1,0	78,112,82	18,14,16	86	86	0.000415963	0.0468791	0.976,0.972,1.0	0.813,0.889,0.837	0.136
337	ENSG00000140382	HMG20A	15	+	77750745	77750900	77750745	77750838	77756581	77756729	4,4,3	0,0,1	0,2,0	8,6,3	141	86	0.000467006	0.0478469	1.0,1.0,0.647	0.0,0.169,0.0	0.826
