# Supplementary material
Source: HighWire-hosted journal article supplement (doi:10.1101/rna.065383.117)
Supplement: Supplemental_Table_S6_differentially_spliced_exon_junctions.xlsx [file Supplemental_Table_S6_differentially_spliced_exon_junctions.xlsx]

## Sheet: S6A Rh18 Sudemycin D1
Table S6A Rh18 Sudemycin differentially spliced exon junctions
Junction	Gene	Annotation_Set	RefGene	EnsGene	AceView	UCSC	Gene.log2FC	Junction.log2FC	AveExpr	t	P.Value	adj.P.Val	RT-PCR
12:69230529:+,12:69233054:+	MDM2	core	NM_002392	ENST00000258148,ENST00000258149,ENST00000299252,ENST00000311420,ENST00000350057,ENST00000356290,ENST00000358483,ENST00000360430,ENST00000393415,ENST00000393417,ENST00000462284,ENST00000481186,ENST00000523991,ENST00000536089,ENST00000540352,ENST00000540827,ENST00000542502,ENST00000544648	MDM2.aAug10,MDM2.bAug10,MDM2.cAug10,MDM2.dAug10,MDM2.eAug10,MDM2.fAug10,MDM2.gAug10	uc001sui.2,uc001sun.3,uc001suo.2,uc009zqx.2,uc009zqz.2,uc009zrd.2,uc009zri.2	2.96722	3.74394	8.14916	64.5718	2.39552e-34	2.52059e-29
12:69229764:+,12:69230452:+	MDM2	core	NM_002392	ENST00000258148,ENST00000258149,ENST00000299252,ENST00000311420,ENST00000350057,ENST00000356290,ENST00000358483,ENST00000360430,ENST00000393417,ENST00000462284,ENST00000481186,ENST00000523991,ENST00000536089,ENST00000540352,ENST00000540827,ENST00000542502,ENST00000544648	MDM2.aAug10,MDM2.bAug10,MDM2.cAug10,MDM2.dAug10,MDM2.eAug10,MDM2.fAug10,MDM2.gAug10	uc001sui.2,uc001sun.3,uc001suo.2,uc009zqx.2,uc009zrd.2,uc009zri.2	2.96722	3.81011	7.64632	58.6123	4.56828e-33	2.40339e-28
12:69202866:+,12:69202988:+	MDM2	extended	None	ENST00000393415,ENST00000393416,ENST00000523991,ENST00000539479,ENST00000543323	MDM2.eAug10,MDM2.hAug10,MDM2.jAug10,MDM2.mAug10,MDM2.pAug10	uc001sun.3,uc009zqy.1,uc009zqz.2,uc009zra.2	2.96722	5.06074	6.74562	57.706	7.33865e-33	2.57393e-28
12:69210725:+,12:69214105:+	MDM2	core	NM_002392	ENST00000258148,ENST00000258149,ENST00000311440,ENST00000350057,ENST00000393415,ENST00000393416,ENST00000393417,ENST00000462284,ENST00000471946,ENST00000539479,ENST00000540352	MDM2.aAug10,MDM2.bAug10,MDM2.cAug10,MDM2.hAug10,MDM2.jAug10,MDM2.mAug10,MDM2.veAug10	uc001sui.2,uc009zqw.2,uc009zqx.2,uc009zqy.1,uc009zqz.2	2.96722	3.07336	7.37907	56.9406	1.10142e-32	2.89732e-28
9:127999433:+,9:128000420:+	HSPA5	core	NM_005347	ENST00000324460	HSPA5.aAug10,HSPA5.bAug10,HSPA5.cAug10	uc004bpn.2	2.31729	2.27184	7.65531	56.4763	1.41282e-32	2.91457e-28
14:21702388:+,14:21737457:+	HNRNPC	core	NM_001077442,NM_001077443	ENST00000336053,ENST00000445284,ENST00000449098,ENST00000555883,ENST00000556142,ENST00000557201	HNRNPC.bAug10,HNRNPC.iAug10,HNRNPC.lAug10,HNRNPC.mAug10	uc001vzz.2,uc001waa.2,uc001wac.2,uc001wae.2	1.53469	3.33582	5.68946	56.1303	1.70293e-32	2.91457e-28
9:128001106:+,9:128001220:+	HSPA5	core	NM_005347	ENST00000324460,ENST00000401067	HSPA5.aAug10,HSPA5.bAug10	uc004bpn.2	2.31729	2.39442	7.30182	55.8912	1.93897e-32	2.91457e-28
9:128001610:+,9:128001700:+	HSPA5	core	NM_005347	ENST00000324460,ENST00000401067	HSPA5.aAug10	uc004bpn.2	2.31729	2.37512	7.57073	55.4013	2.53386e-32	3.33268e-28
9:128001812:+,9:128002451:+	HSPA5	core	NM_005347	ENST00000324460,ENST00000401067	HSPA5.aAug10	uc004bpn.2	2.31729	2.24906	7.451	54.7366	3.65656e-32	4.27497e-28
20:47895745:+,20:47905582:+	NCRNA00275	core	NR_003606	ENST00000417721	NCRNA00275andSNORD12CandSNORD12B.aAug10,NCRNA00275andSNORD12CandSNORD12B.dAug10	uc002xun.3	1.7613	3.7699	5.59927	54.4741	4.2315e-32	4.45242e-28
9:128000587:+,9:128000869:+	HSPA5	core	NM_005347	ENST00000324460	HSPA5.aAug10,HSPA5.bAug10,HSPA5.cAug10	uc004bpn.2	2.31729	2.26423	7.56723	53.546	7.13147e-32	6.82164e-28
9:128002588:+,9:128002955:+	HSPA5	core	NM_005347	ENST00000324460,ENST00000401067	HSPA5.aAug10	uc004bpn.2	2.31729	2.29205	7.11744	52.8933	1.03495e-31	9.07488e-28
9:128003186:+,9:128003284:+	HSPA5	core	NM_005347	ENST00000324460,ENST00000401067	HSPA5.aAug10	uc004bpn.2	2.31729	2.37591	6.82419	51.9189	1.81995e-31	1.33864e-27
X:102611534:+,X:102612543:+	WBP5	core	NM_001006613	ENST00000372656	WBP5.dAug10	uc004ekg.2	0.348326	3.03504	5.49451	51.8379	1.90833e-31	1.33864e-27
12:69203072:+,12:69207334:+	MDM2	core	NM_002392	ENST00000258148,ENST00000258149,ENST00000299252,ENST00000311420,ENST00000311440,ENST00000356290,ENST00000358483,ENST00000393410,ENST00000393415,ENST00000393416,ENST00000393417,ENST00000462284,ENST00000493419,ENST00000496959,ENST00000517852,ENST00000523991,ENST00000536089,ENST00000537182,ENST00000539479,ENST00000540352,ENST00000542502,ENST00000543323,ENST00000544561,ENST00000544648,ENST00000546048	MDM2.aAug10,MDM2.cAug10,MDM2.dAug10,MDM2.eAug10,MDM2.hAug10,MDM2.jAug10,MDM2.kAug10,MDM2.mAug10,MDM2.oAug10,MDM2.pAug10,MDM2.qAug10,MDM2.rAug10,MDM2.sAug10,MDM2.vcAug10	uc001sui.2,uc001suk.2,uc001sum.1,uc001sun.3,uc009zqw.2,uc009zqx.2,uc009zqy.1,uc009zqz.2,uc009zra.2,uc009zrb.1,uc009zrc.2,uc009zre.2,uc009zri.2	2.96722	3.03868	7.20721	51.1604	2.84464e-31	1.76068e-27
2:216286966:+,2:216288073:+	FN1	core	NM_002026,NM_054034,NM_212474,NM_212476,NM_212478,NM_212482	ENST00000265313,ENST00000323926,ENST00000336916,ENST00000345488,ENST00000346544,ENST00000354785,ENST00000356005,ENST00000357009,ENST00000357867,ENST00000359671,ENST00000421182,ENST00000426059,ENST00000432072,ENST00000443816,ENST00000446046	FN1.aAug10,FN1.bAug10,FN1.cAug10,FN1.dAug10,FN1.eAug10,FN1.fAug10,FN1.gAug10,FN1.hAug10,FN1.iAug10,FN1.jAug10,FN1.lAug10,FN1.mAug10	uc002vfa.2,uc002vfb.2,uc002vfc.2,uc002vfd.2,uc002vfe.2,uc002vff.2,uc002vfg.2,uc002vfh.2,uc002vfi.2,uc002vfj.2,uc002vfl.2	1.9726	2.14074	7.72056	50.8206	3.48188e-31	1.96497e-27
2:216298184:+,2:216299419:+	FN1	core	NM_002026,NM_054034,NM_212474,NM_212476,NM_212478,NM_212482	ENST00000265313,ENST00000323926,ENST00000336916,ENST00000345488,ENST00000346544,ENST00000354785,ENST00000356005,ENST00000357009,ENST00000357867,ENST00000359671,ENST00000421182,ENST00000426059,ENST00000432072,ENST00000443816,ENST00000446046	FN1.aAug10,FN1.bAug10,FN1.cAug10,FN1.dAug10,FN1.eAug10,FN1.fAug10,FN1.gAug10,FN1.hAug10,FN1.iAug10,FN1.jAug10,FN1.lAug10	uc002vfa.2,uc002vfb.2,uc002vfc.2,uc002vfd.2,uc002vfe.2,uc002vff.2,uc002vfg.2,uc002vfh.2,uc002vfi.2,uc002vfj.2,uc002vfl.2	1.9726	2.13281	7.59866	50.789	3.5482e-31	1.96497e-27
2:216285524:+,2:216286814:+	FN1	core	NM_002026,NM_054034,NM_212474,NM_212476,NM_212478,NM_212482	ENST00000265313,ENST00000323926,ENST00000336916,ENST00000345488,ENST00000346544,ENST00000354785,ENST00000356005,ENST00000357009,ENST00000357867,ENST00000359671,ENST00000421182,ENST00000426059,ENST00000432072,ENST00000443816,ENST00000446046	FN1.aAug10,FN1.bAug10,FN1.cAug10,FN1.dAug10,FN1.eAug10,FN1.fAug10,FN1.gAug10,FN1.hAug10,FN1.iAug10,FN1.jAug10,FN1.lAug10,FN1.mAug10	uc002vfa.2,uc002vfb.2,uc002vfc.2,uc002vfd.2,uc002vfe.2,uc002vff.2,uc002vfg.2,uc002vfh.2,uc002vfi.2,uc002vfj.2,uc002vfl.2	1.9726	2.11642	7.71722	50.6054	3.96034e-31	2.08356e-27
12:69222711:+,12:69229609:+	MDM2	core	NM_002392	ENST00000258148,ENST00000258149,ENST00000311420,ENST00000350057,ENST00000393415,ENST00000393417,ENST00000462284,ENST00000539479,ENST00000542502,ENST00000544648	MDM2.aAug10,MDM2.bAug10,MDM2.cAug10,MDM2.dAug10,MDM2.hAug10,MDM2.jAug10	uc001sui.2,uc009zqx.2,uc009zqy.1,uc009zqz.2,uc009zri.2	2.96722	2.83983	7.65173	50.3403	4.64418e-31	2.09442e-27
2:216272920:+,2:216273021:+	FN1	core	NM_002026,NM_212474,NM_212476,NM_212478,NM_212482	ENST00000265313,ENST00000323926,ENST00000336916,ENST00000345488,ENST00000346544,ENST00000354785,ENST00000356005,ENST00000357009,ENST00000357867,ENST00000359671,ENST00000421182,ENST00000432072,ENST00000443816,ENST00000446046	FN1.aAug10,FN1.bAug10,FN1.cAug10,FN1.dAug10,FN1.eAug10,FN1.fAug10,FN1.gAug10,FN1.hAug10,FN1.iAug10,FN1.jAug10,FN1.mAug10,FN1.vdAug10	uc002vfa.2,uc002vfb.2,uc002vfc.2,uc002vfd.2,uc002vfe.2,uc002vff.2,uc002vfg.2,uc002vfh.2,uc002vfi.2,uc002vfj.2	1.9726	2.06106	7.79579	50.1486	5.21407e-31	2.09442e-27
20:34326939:+,20:34328746:+	RBM39	core	NM_001242599,NM_001242600,NM_004902,NM_184234,NR_040723	ENST00000253363,ENST00000338163,ENST00000361162,ENST00000374038,ENST00000397370,ENST00000407261,ENST00000426951,ENST00000427743,ENST00000429968,ENST00000433027,ENST00000434927,ENST00000442447,ENST00000528062	RBM39.aAug10,RBM39.bAug10,RBM39.cAug10,RBM39.eAug10,RBM39.fAug10,RBM39.gAug10,RBM39.hAug10,RBM39.nAug10,RBM39.pAug10,RBM39.tAug10,RBM39.vbAug10,RBM39.vgAug10,RBM39.vhAug10	uc002xeb.2,uc002xec.2,uc002xee.2,uc002xeg.2,uc010zvm.1	0.714398	3.21642	5.01406	50.0088	5.67452e-31	2.09442e-27
12:69218210:+,12:69218335:+	MDM2	core	NM_002392	ENST00000311420,ENST00000311440,ENST00000350057,ENST00000393415,ENST00000393416,ENST00000393417,ENST00000462284,ENST00000481186,ENST00000496959,ENST00000536089,ENST00000539479,ENST00000540352,ENST00000543046,ENST00000544648,ENST00000546048	MDM2.aAug10,MDM2.bAug10,MDM2.dAug10,MDM2.fAug10,MDM2.hAug10,MDM2.jAug10,MDM2.mAug10,MDM2.nAug10,MDM2.vcAug10	uc001sui.2,uc009zqw.2,uc009zqy.1,uc009zqz.2,uc009zrc.2,uc009zrd.2,uc009zri.2	2.96722	2.42275	7.67489	49.9806	5.77243e-31	2.09442e-27
2:216288249:+,2:216288869:+	FN1	core	NM_002026,NM_054034,NM_212474,NM_212476,NM_212478,NM_212482	ENST00000265313,ENST00000323926,ENST00000336916,ENST00000345488,ENST00000346544,ENST00000354785,ENST00000356005,ENST00000357009,ENST00000357867,ENST00000359671,ENST00000421182,ENST00000426059,ENST00000432072,ENST00000443816,ENST00000446046	FN1.aAug10,FN1.bAug10,FN1.cAug10,FN1.dAug10,FN1.eAug10,FN1.fAug10,FN1.gAug10,FN1.hAug10,FN1.iAug10,FN1.jAug10,FN1.lAug10	uc002vfa.2,uc002vfb.2,uc002vfc.2,uc002vfd.2,uc002vfe.2,uc002vff.2,uc002vfg.2,uc002vfh.2,uc002vfi.2,uc002vfj.2,uc002vfl.2	1.9726	2.09826	7.76853	49.7899	6.48212e-31	2.2378e-27
2:216264074:+,2:216269112:+	FN1	core	NM_002026,NM_212474,NM_212476,NM_212478,NM_212482	ENST00000265313,ENST00000323926,ENST00000336916,ENST00000345488,ENST00000346544,ENST00000354785,ENST00000356005,ENST00000357009,ENST00000357867,ENST00000359671,ENST00000421182,ENST00000432072,ENST00000443816,ENST00000446046	FN1.aAug10,FN1.bAug10,FN1.cAug10,FN1.dAug10,FN1.eAug10,FN1.fAug10,FN1.gAug10,FN1.hAug10,FN1.iAug10,FN1.jAug10	uc002vfa.2,uc002vfb.2,uc002vfc.2,uc002vfd.2,uc002vfe.2,uc002vff.2,uc002vfg.2,uc002vfh.2,uc002vfi.2,uc002vfj.2	1.9726	2.00586	7.89871	49.762	6.59295e-31	2.2378e-27
2:216299547:+,2:216300378:+	FN1	core	NM_002026,NM_054034,NM_212474,NM_212476,NM_212478,NM_212482	ENST00000265313,ENST00000323926,ENST00000336916,ENST00000345488,ENST00000346544,ENST00000354785,ENST00000356005,ENST00000357009,ENST00000357867,ENST00000359671,ENST00000421182,ENST00000426059,ENST00000432072,ENST00000443816,ENST00000446046	FN1.aAug10,FN1.bAug10,FN1.cAug10,FN1.dAug10,FN1.eAug10,FN1.fAug10,FN1.gAug10,FN1.hAug10,FN1.iAug10,FN1.jAug10,FN1.lAug10	uc002vfa.2,uc002vfb.2,uc002vfc.2,uc002vfd.2,uc002vfe.2,uc002vff.2,uc002vfg.2,uc002vfh.2,uc002vfi.2,uc002vfj.2,uc002vfl.2	1.9726	2.17312	7.47942	49.5205	7.64067e-31	2.44701e-27
12:57911536:+,12:57914201:+	DDIT3	core	NM_001195053,NM_001195054,NM_001195055,NM_001195056,NM_001195057,NM_004083	ENST00000346473,ENST00000547303,ENST00000547526,ENST00000551116,ENST00000552740	DDIT3.aAug10,DDIT3.dAug10,DDIT3.eAug10,DDIT3.fAug10,DDIT3.gAug10,DDIT3.hAug10,DDIT3.iAug10,DDIT3.jAug10	uc001soi.2,uc009zps.2,uc009zpt.2	1.96158	3.67758	4.74595	49.4865	7.80183e-31	2.44701e-27
2:216273149:+,2:216274286:+	FN1	core	NM_002026,NM_212474,NM_212476,NM_212478,NM_212482	ENST00000265313,ENST00000323926,ENST00000336916,ENST00000345488,ENST00000346544,ENST00000354785,ENST00000356005,ENST00000357009,ENST00000357867,ENST00000359671,ENST00000421182,ENST00000432072,ENST00000443816,ENST00000446046,ENST00000471193	FN1.aAug10,FN1.bAug10,FN1.cAug10,FN1.dAug10,FN1.eAug10,FN1.fAug10,FN1.gAug10,FN1.hAug10,FN1.iAug10,FN1.jAug10,FN1.mAug10,FN1.vdAug10,FN1.vwAug10	uc002vfa.2,uc002vfb.2,uc002vfc.2,uc002vfd.2,uc002vfe.2,uc002vff.2,uc002vfg.2,uc002vfh.2,uc002vfi.2,uc002vfj.2	1.9726	2.05465	7.64034	48.9975	1.05418e-30	3.16919e-27
2:216289048:+,2:216289817:+	FN1	core	NM_002026,NM_054034,NM_212474,NM_212476,NM_212478,NM_212482	ENST00000265313,ENST00000323926,ENST00000336916,ENST00000345488,ENST00000346544,ENST00000354785,ENST00000356005,ENST00000357009,ENST00000357867,ENST00000359671,ENST00000421182,ENST00000426059,ENST00000432072,ENST00000443816,ENST00000446046	FN1.aAug10,FN1.bAug10,FN1.cAug10,FN1.dAug10,FN1.eAug10,FN1.fAug10,FN1.gAug10,FN1.hAug10,FN1.iAug10,FN1.jAug10,FN1.lAug10	uc002vfa.2,uc002vfb.2,uc002vfc.2,uc002vfd.2,uc002vfe.2,uc002vff.2,uc002vfg.2,uc002vfh.2,uc002vfi.2,uc002vfj.2,uc002vfl.2	1.9726	2.14463	7.53783	48.832	1.16807e-30	3.41405e-27
7:100780365:+,7:100780686:+	SERPINE1	core	NM_000602,NM_001165413	ENST00000223095,ENST00000445463,ENST00000536888	SERPINE1.aAug10,SERPINE1.bAug10,SERPINE1.cAug10,SERPINE1.dAug10	uc003uxt.2,uc011kkj.1	2.36128	2.24005	7.15856	48.7315	1.24328e-30	3.53564e-27
12:49065745:+,12:49073438:+	C12orf41	extended	None	ENST00000546701,ENST00000547536,ENST00000548147	CCNT1_.hAug10,CCNT1_.pAug10	uc001rrw.2,uc001rry.2	0.860292	3.44564	5.29891	48.6157	1.33623e-30	3.69997e-27
2:216271233:+,2:216271850:+	FN1	core	NM_002026,NM_212474,NM_212476,NM_212478,NM_212482	ENST00000265313,ENST00000323926,ENST00000336916,ENST00000345488,ENST00000346544,ENST00000354785,ENST00000356005,ENST00000357009,ENST00000357867,ENST00000359671,ENST00000421182,ENST00000432072,ENST00000443816,ENST00000446046	FN1.aAug10,FN1.bAug10,FN1.cAug10,FN1.dAug10,FN1.eAug10,FN1.fAug10,FN1.gAug10,FN1.hAug10,FN1.iAug10,FN1.jAug10,FN1.mAug10	uc002vfa.2,uc002vfb.2,uc002vfc.2,uc002vfd.2,uc002vfe.2,uc002vff.2,uc002vfg.2,uc002vfh.2,uc002vfi.2,uc002vfj.2	1.9726	2.02441	7.43666	48.3401	1.58748e-30	4.18492e-27
2:216284108:+,2:216285396:+	FN1	core	NM_002026,NM_054034,NM_212474,NM_212476,NM_212478,NM_212482	ENST00000265313,ENST00000323926,ENST00000336916,ENST00000345488,ENST00000346544,ENST00000354785,ENST00000356005,ENST00000357009,ENST00000357867,ENST00000359671,ENST00000421182,ENST00000426059,ENST00000432072,ENST00000443816,ENST00000446046,ENST00000496542	FN1.aAug10,FN1.bAug10,FN1.cAug10,FN1.dAug10,FN1.eAug10,FN1.fAug10,FN1.gAug10,FN1.hAug10,FN1.iAug10,FN1.jAug10,FN1.lAug10,FN1.mAug10,FN1.vdAug10,FN1.vhAug10	uc002vfa.2,uc002vfb.2,uc002vfc.2,uc002vfd.2,uc002vfe.2,uc002vff.2,uc002vfg.2,uc002vfh.2,uc002vfi.2,uc002vfj.2,uc002vfl.2	1.9726	2.0809	7.84239	48.2721	1.65665e-30	4.18492e-27
2:216272044:+,2:216272831:+	FN1	core	NM_002026,NM_212474,NM_212476,NM_212478,NM_212482	ENST00000265313,ENST00000323926,ENST00000336916,ENST00000345488,ENST00000346544,ENST00000354785,ENST00000356005,ENST00000357009,ENST00000357867,ENST00000359671,ENST00000421182,ENST00000432072,ENST00000443816,ENST00000446046	FN1.aAug10,FN1.bAug10,FN1.cAug10,FN1.dAug10,FN1.eAug10,FN1.fAug10,FN1.gAug10,FN1.hAug10,FN1.iAug10,FN1.jAug10,FN1.mAug10,FN1.vdAug10,FN1.vwAug10	uc002vfa.2,uc002vfb.2,uc002vfc.2,uc002vfd.2,uc002vfe.2,uc002vff.2,uc002vfg.2,uc002vfh.2,uc002vfi.2,uc002vfj.2	1.9726	2.00007	7.67455	48.0859	1.86237e-30	4.45364e-27
12:69202271:+,12:69202988:+	MDM2	core	NM_002392	ENST00000258148,ENST00000258149,ENST00000311420,ENST00000311440,ENST00000356290,ENST00000358483,ENST00000393412,ENST00000393417,ENST00000428863,ENST00000462284,ENST00000493419,ENST00000540827,ENST00000544648	MDM2.aAug10,MDM2.cAug10,MDM2.dAug10,MDM2.qAug10,MDM2.rAug10,MDM2.sAug10	uc001sui.2,uc001suk.2,uc009zqw.2,uc009zqx.2,uc009zri.2	2.96722	2.91744	6.26686	47.9627	2.01296e-30	4.70679e-27
2:216257926:+,2:216259251:+	FN1	core	NM_212482	ENST00000265313,ENST00000323926,ENST00000354785,ENST00000432072	FN1.aAug10,FN1.bAug10,FN1.cAug10,FN1.gAug10	uc002vfa.2,uc002vfd.2,uc002vfi.2,uc002vfj.2	1.9726	2.02689	7.55941	47.8503	2.16125e-30	4.83783e-27
12:69207408:+,12:69210592:+	MDM2	core	NM_002392	ENST00000258148,ENST00000258149,ENST00000311440,ENST00000393415,ENST00000462284,ENST00000471946,ENST00000493419,ENST00000539479,ENST00000540352,ENST00000544561	MDM2.aAug10,MDM2.cAug10,MDM2.hAug10,MDM2.jAug10,MDM2.rAug10,MDM2.veAug10	uc001sui.2,uc001suk.2,uc009zqw.2,uc009zqx.2,uc009zqy.1,uc009zqz.2	2.96722	2.92689	7.02336	47.8172	2.20693e-30	4.83783e-27
5:179041960:+,5:179043127:+	HNRNPH1	extended	None	ENST00000329433,ENST00000521720,ENST00000524179	HNRNPH1.hAug10,HNRNPH1.uAug10,HNRNPH1.vpAug10	None	0.509487	4.02983	4.04972	47.6197	2.50175e-30	5.1615e-27
7:100777174:+,7:100778775:+	SERPINE1	core	NM_000602,NM_001165413	ENST00000223095,ENST00000445463,ENST00000536888	SERPINE1.aAug10,SERPINE1.bAug10,SERPINE1.cAug10,SERPINE1.dAug10	uc003uxt.2,uc011kkj.1	2.36128	2.32539	6.91223	47.4646	2.76152e-30	5.58789e-27
7:100778875:+,7:100778996:+	SERPINE1	core	NM_000602,NM_001165413	ENST00000223095,ENST00000445463,ENST00000536888	SERPINE1.aAug10,SERPINE1.bAug10,SERPINE1.cAug10,SERPINE1.dAug10	uc003uxt.2,uc011kkj.1	2.36128	2.31882	6.82735	47.2601	3.14743e-30	6.0914e-27
2:216296687:+,2:216298047:+	FN1	core	NM_002026,NM_054034,NM_212474,NM_212476,NM_212478,NM_212482	ENST00000265313,ENST00000323926,ENST00000336916,ENST00000345488,ENST00000346544,ENST00000354785,ENST00000356005,ENST00000357009,ENST00000357867,ENST00000359671,ENST00000421182,ENST00000426059,ENST00000432072,ENST00000443816,ENST00000446046	FN1.aAug10,FN1.bAug10,FN1.cAug10,FN1.dAug10,FN1.eAug10,FN1.fAug10,FN1.gAug10,FN1.hAug10,FN1.iAug10,FN1.jAug10,FN1.lAug10	uc002vfa.2,uc002vfb.2,uc002vfc.2,uc002vfd.2,uc002vfe.2,uc002vff.2,uc002vfg.2,uc002vfh.2,uc002vfi.2,uc002vfj.2,uc002vfl.2	1.9726	2.09347	7.72108	47.24	3.18812e-30	6.0914e-27
12:69218431:+,12:69222551:+	MDM2	core	NM_002392	ENST00000311420,ENST00000311440,ENST00000350057,ENST00000393415,ENST00000393416,ENST00000393417,ENST00000462284,ENST00000539479,ENST00000544648	MDM2.aAug10,MDM2.bAug10,MDM2.dAug10,MDM2.hAug10,MDM2.jAug10	uc001sui.2,uc009zqy.1,uc009zqz.2,uc009zri.2	2.96722	2.3154	7.30972	47.0846	3.52257e-30	6.3728e-27
2:216251681:+,2:216252935:+	FN1	core	NM_002026,NM_212474,NM_212476,NM_212478,NM_212482	ENST00000323926,ENST00000336916,ENST00000345488,ENST00000346544,ENST00000354785,ENST00000356005,ENST00000357009,ENST00000357867,ENST00000359671,ENST00000421182,ENST00000432072,ENST00000443816,ENST00000446046,ENST00000456923,ENST00000492816	FN1.aAug10,FN1.bAug10,FN1.cAug10,FN1.dAug10,FN1.eAug10,FN1.fAug10,FN1.gAug10,FN1.hAug10,FN1.iAug10,FN1.jAug10,FN1.kAug10,FN1.vcAug10,FN1.vkAug10	uc002vez.2,uc002vfa.2,uc002vfb.2,uc002vfc.2,uc002vfd.2,uc002vfe.2,uc002vff.2,uc002vfg.2,uc002vfh.2,uc002vfi.2,uc002vfj.2,uc010zjp.1	1.9726	2.00678	7.86324	47.0624	3.57339e-30	6.3728e-27
2:216259442:+,2:216261860:+	FN1	core	NM_002026,NM_212474,NM_212476,NM_212478,NM_212482	ENST00000265313,ENST00000323926,ENST00000336916,ENST00000345488,ENST00000346544,ENST00000354785,ENST00000356005,ENST00000357009,ENST00000357867,ENST00000359671,ENST00000421182,ENST00000432072,ENST00000443816,ENST00000446046	FN1.aAug10,FN1.bAug10,FN1.cAug10,FN1.dAug10,FN1.eAug10,FN1.fAug10,FN1.gAug10,FN1.hAug10,FN1.iAug10,FN1.jAug10,FN1.vlAug10	uc002vfa.2,uc002vfb.2,uc002vfc.2,uc002vfd.2,uc002vfe.2,uc002vff.2,uc002vfg.2,uc002vfh.2,uc002vfi.2,uc002vfj.2	1.9726	2.01674	7.59165	46.9573	3.8235e-30	6.70521e-27
2:216293061:+,2:216295438:+	FN1	core	NM_002026,NM_054034,NM_212474,NM_212476,NM_212478,NM_212482	ENST00000265313,ENST00000323926,ENST00000336916,ENST00000345488,ENST00000346544,ENST00000354785,ENST00000356005,ENST00000357009,ENST00000357867,ENST00000359671,ENST00000421182,ENST00000426059,ENST00000432072,ENST00000443816,ENST00000446046	FN1.aAug10,FN1.bAug10,FN1.cAug10,FN1.dAug10,FN1.eAug10,FN1.fAug10,FN1.gAug10,FN1.hAug10,FN1.iAug10,FN1.jAug10,FN1.lAug10,FN1.vfAug10	uc002vfa.2,uc002vfb.2,uc002vfc.2,uc002vfd.2,uc002vfe.2,uc002vff.2,uc002vfg.2,uc002vfh.2,uc002vfi.2,uc002vfj.2,uc002vfl.2	1.9726	2.06792	7.81609	46.923	3.90921e-30	6.74313e-27
2:216256537:+,2:216257654:+	FN1	core	NM_212482	ENST00000265313,ENST00000323926,ENST00000354785,ENST00000432072,ENST00000456923	FN1.aAug10,FN1.bAug10,FN1.cAug10,FN1.gAug10,FN1.kAug10	uc002vfa.2,uc002vfd.2,uc002vfi.2,uc002vfj.2,uc010zjp.1	1.9726	2.04751	7.36857	46.4292	5.38491e-30	8.99374e-27
12:69214154:+,12:69218143:+	MDM2	core	NM_002392	ENST00000311420,ENST00000311440,ENST00000350057,ENST00000393415,ENST00000393416,ENST00000393417,ENST00000462284,ENST00000536089,ENST00000537182,ENST00000539479,ENST00000540352,ENST00000544648,ENST00000546048	MDM2.aAug10,MDM2.bAug10,MDM2.dAug10,MDM2.hAug10,MDM2.jAug10,MDM2.mAug10	uc001sui.2,uc009zqw.2,uc009zqy.1,uc009zqz.2,uc009zri.2	2.96722	2.57423	7.56494	46.2884	5.90314e-30	9.56885e-27
7:100779082:+,7:100780282:+	SERPINE1	core	NM_000602,NM_001165413	ENST00000223095,ENST00000445463,ENST00000536888	SERPINE1.aAug10,SERPINE1.bAug10,SERPINE1.cAug10,SERPINE1.dAug10	uc003uxt.2,uc011kkj.1	2.36128	2.33073	6.84692	45.736	8.4893e-30	1.29457e-26
7:100771945:+,7:100773702:+	SERPINE1	core	NM_000602,NM_001165413	ENST00000223095,ENST00000441467,ENST00000445463	SERPINE1.aAug10,SERPINE1.bAug10,SERPINE1.cAug10	uc003uxt.2,uc011kkj.1	2.36128	2.37853	6.63793	45.5652	9.50667e-30	1.429e-26
14:52187108:+,14:52188667:+	FRMD6	core	NM_001042481,NM_152330	ENST00000344768,ENST00000356218,ENST00000395718,ENST00000553556,ENST00000554167,ENST00000557522	FRMD6.aAug10,FRMD6.bAug10,FRMD6.cAug10,FRMD6.dAug10,FRMD6.eAug10,FRMD6.gAug10	uc001wzb.2,uc001wzc.2,uc001wzd.2,uc001wze.2,uc001wzf.2,uc001wzg.2	2.63454	2.99075	5.02286	45.3102	1.12653e-29	1.62376e-26
12:131356671:+,12:131357381:+	RAN	extended	None	ENST00000254675,ENST00000448750,ENST00000464211,ENST00000536606,ENST00000537745,ENST00000541630	RAN.eAug10,RAN.gAug10,RAN.hAug10,RAN.iAug10,RAN.jAug10,RAN.kAug10	uc010tbk.1,uc010tbl.1	0.488825	4.78106	3.70908	45.1759	1.23235e-29	1.75229e-26
7:100775350:+,7:100776976:+	SERPINE1	core	NM_000602,NM_001165413	ENST00000223095,ENST00000445463,ENST00000536888	SERPINE1.aAug10,SERPINE1.bAug10,SERPINE1.cAug10,SERPINE1.dAug10	uc003uxt.2,uc003uxu.1,uc011kkj.1	2.36128	2.41829	6.62917	45.076	1.31773e-29	1.8487e-26
2:216295575:+,2:216296556:+	FN1	core	NM_002026,NM_054034,NM_212474,NM_212476,NM_212478,NM_212482	ENST00000265313,ENST00000323926,ENST00000336916,ENST00000345488,ENST00000346544,ENST00000354785,ENST00000356005,ENST00000357009,ENST00000357867,ENST00000359671,ENST00000421182,ENST00000426059,ENST00000432072,ENST00000443816,ENST00000446046	FN1.aAug10,FN1.bAug10,FN1.cAug10,FN1.dAug10,FN1.eAug10,FN1.fAug10,FN1.gAug10,FN1.hAug10,FN1.iAug10,FN1.jAug10,FN1.lAug10,FN1.vfAug10	uc002vfa.2,uc002vfb.2,uc002vfc.2,uc002vfd.2,uc002vfe.2,uc002vff.2,uc002vfg.2,uc002vfh.2,uc002vfi.2,uc002vfj.2,uc002vfl.2	1.9726	2.08758	7.6367	44.9586	1.42581e-29	1.97401e-26
2:216274462:+,2:216274657:+	FN1	core	NM_002026,NM_212474,NM_212476,NM_212478,NM_212482	ENST00000265313,ENST00000323926,ENST00000336916,ENST00000345488,ENST00000346544,ENST00000354785,ENST00000356005,ENST00000357009,ENST00000357867,ENST00000359671,ENST00000421182,ENST00000432072,ENST00000443816,ENST00000446046	FN1.aAug10,FN1.bAug10,FN1.cAug10,FN1.dAug10,FN1.eAug10,FN1.fAug10,FN1.gAug10,FN1.hAug10,FN1.iAug10,FN1.jAug10,FN1.mAug10	uc002vfa.2,uc002vfb.2,uc002vfc.2,uc002vfd.2,uc002vfe.2,uc002vff.2,uc002vfg.2,uc002vfh.2,uc002vfi.2,uc002vfj.2	1.9726	2.00717	7.77657	44.8498	1.5342e-29	2.0965e-26
7:100773935:+,7:100775156:+	SERPINE1	core	NM_000602,NM_001165413	ENST00000223095,ENST00000445463	SERPINE1.aAug10,SERPINE1.bAug10,SERPINE1.cAug10	uc003uxt.2,uc011kkj.1	2.36128	2.39312	6.41215	44.7478	1.64355e-29	2.21713e-26
14:52174951:+,14:52178249:+	FRMD6	core	NM_001042481,NM_152330	ENST00000344768,ENST00000356218,ENST00000395718,ENST00000554167,ENST00000554495,ENST00000557183	FRMD6.aAug10,FRMD6.bAug10,FRMD6.cAug10,FRMD6.dAug10,FRMD6.fAug10,FRMD6.qAug10	uc001wzb.2,uc001wzc.2,uc001wzd.2,uc001wze.2	2.63454	2.99457	4.72784	44.586	1.83382e-29	2.44248e-26
12:69925836:+,12:69955960:+	FRS2	core	NM_001042555	ENST00000397997,ENST00000547219,ENST00000547414,ENST00000549092,ENST00000549921,ENST00000550316	FRS2.cAug10,FRS2.dAug10,FRS2.hAug10,FRS2.jAug10,FRS2.kAug10,FRS2.lAug10	uc001suz.2,uc009zrj.2	1.09463	2.72508	6.3757	44.3545	2.14634e-29	2.823e-26
7:5569364:+,7:5570155:+	ACTB	extended	None	ENST00000484841	ACTB.aAug10,ACTB.rAug10	None	0.895135	5.29207	3.54069	44.08	2.58934e-29	3.36361e-26
12:69864310:+,12:69924645:+	FRS2	core	NM_006654	ENST00000299293,ENST00000547414,ENST00000548154,ENST00000549921,ENST00000550937	FRS2.aAug10,FRS2.cAug10,FRS2.fAug10,FRS2.gAug10,FRS2.lAug10	uc001suy.2,uc009zrj.2	1.09463	2.64847	6.35239	43.82	3.09633e-29	3.97316e-26
2:216261946:+,2:216262403:+	FN1	core	NM_002026,NM_212474,NM_212476,NM_212478,NM_212482	ENST00000265313,ENST00000323926,ENST00000336916,ENST00000345488,ENST00000346544,ENST00000354785,ENST00000356005,ENST00000357009,ENST00000357867,ENST00000359671,ENST00000421182,ENST00000432072,ENST00000443816,ENST00000446046	FN1.aAug10,FN1.bAug10,FN1.cAug10,FN1.dAug10,FN1.eAug10,FN1.fAug10,FN1.gAug10,FN1.hAug10,FN1.iAug10,FN1.jAug10	uc002vfa.2,uc002vfb.2,uc002vfc.2,uc002vfd.2,uc002vfe.2,uc002vff.2,uc002vfg.2,uc002vfh.2,uc002vfi.2,uc002vfj.2	1.9726	2.04933	7.25763	43.4128	4.10516e-29	5.2042e-26
7:100770525:+,7:100771674:+	SERPINE1	core	NM_000602,NM_001165413	ENST00000223095,ENST00000441467,ENST00000445463	SERPINE1.aAug10,SERPINE1.bAug10	uc003uxt.2,uc011kkj.1	2.36128	2.38403	6.22924	43.2083	4.7345e-29	5.93059e-26
20:34320057:+,20:34326890:+	RBM39	core	NM_001242599,NM_001242600,NM_004902,NM_184234,NR_040722,NR_040724	ENST00000253363,ENST00000338163,ENST00000361162,ENST00000374038,ENST00000403542,ENST00000416108,ENST00000425184,ENST00000426951,ENST00000427743,ENST00000434927,ENST00000444878,ENST00000455343,ENST00000461283,ENST00000463004,ENST00000477334,ENST00000481037,ENST00000528062	RBM39.aAug10,RBM39.bAug10,RBM39.cAug10,RBM39.eAug10,RBM39.fAug10,RBM39.iAug10,RBM39.jAug10,RBM39.kAug10,RBM39.lAug10,RBM39.mAug10,RBM39.nAug10,RBM39.oAug10,RBM39.pAug10,RBM39.vbAug10,RBM39.vgAug10,RBM39.vjAug10,RBM39.vkAug10,RBM39.vsAug10,RBM39.vuAug10,RBM39.wcAug10,RBM39.whAug10	uc002xea.2,uc002xeb.2,uc002xec.2,uc002xed.2,uc002xef.2,uc002xeg.2,uc010gfn.2,uc010zvm.1,uc010zvn.1	0.714398	2.2482	5.77298	42.8746	5.98377e-29	7.40728e-26
2:151328275:+,2:151331389:+	RND3	core	NM_001254738,NM_005168	ENST00000263895,ENST00000375734,ENST00000409557,ENST00000466334,ENST00000472416,ENST00000497865	RND3.aAug10,RND3.bAug10,RND3.dAug10,RND3.eAug10,RND3.fAug10,RND3.hAug10,RND3.jAug10,RND3.mAug10	uc002txe.2,uc002txg.2,uc010zbw.1	1.9822	2.46609	5.75496	42.8182	6.22624e-29	7.53024e-26
2:216279681:+,2:216283965:+	FN1	core	NM_002026,NM_054034,NM_212474,NM_212476,NM_212478,NM_212482	ENST00000265313,ENST00000323926,ENST00000336916,ENST00000345488,ENST00000346544,ENST00000354785,ENST00000356005,ENST00000357009,ENST00000357867,ENST00000359671,ENST00000421182,ENST00000426059,ENST00000432072,ENST00000443816,ENST00000446046	FN1.aAug10,FN1.bAug10,FN1.cAug10,FN1.dAug10,FN1.eAug10,FN1.fAug10,FN1.gAug10,FN1.hAug10,FN1.iAug10,FN1.jAug10,FN1.lAug10,FN1.mAug10,FN1.vdAug10,FN1.vhAug10	uc002vfa.2,uc002vfb.2,uc002vfc.2,uc002vfd.2,uc002vfe.2,uc002vff.2,uc002vfg.2,uc002vfh.2,uc002vfi.2,uc002vfj.2,uc002vfl.2	1.9726	2.03746	7.53603	42.4423	8.12547e-29	9.6064e-26
20:2442585:+,20:2443282:+	SNRPB	core	NM_003091	ENST00000303103,ENST00000381342	ZNF343andSNRPB.gAug10,ZNF343andSNRPB.iAug10	uc002wga.1	1.4719	2.57412	5.41972	42.2907	9.05238e-29	1.0467e-25
20:47895253:+,20:47895641:+	NCRNA00275	core	NR_003604,NR_003606,NR_036658	ENST00000371743,ENST00000417721,ENST00000441722,ENST00000450535	NCRNA00275andSNORD12CandSNORD12B.aAug10,NCRNA00275andSNORD12CandSNORD12B.eAug10,NCRNA00275andSNORD12CandSNORD12B.fAug10,NCRNA00275andSNORD12CandSNORD12B.gAug10,NCRNA00275andSNORD12CandSNORD12B.iAug10,NCRNA00275andSNORD12CandSNORD12B.kAug10,NCRNA00275andSNORD12CandSNORD12B.mAug10,NCRNA00275andSNORD12CandSNORD12B.qAug10,NCRNA00275andSNORD12CandSNORD12B.rAug10	uc002xul.3,uc002xum.3,uc002xun.3	1.7613	2.15545	7.30496	42.0947	1.04148e-28	1.19115e-25
12:69966061:+,12:69967785:+	FRS2	core	NM_001042555,NM_006654	ENST00000299293,ENST00000397997,ENST00000549921,ENST00000550389	FRS2.aAug10,FRS2.bAug10,FRS2.cAug10,FRS2.dAug10	uc001suy.2,uc001suz.2,uc009zrj.2,uc009zrk.2	1.09463	2.45412	6.40309	42.0125	1.10477e-28	1.24994e-25
2:198283312:+,2:198285152:+	SF3B1	core	NM_012433	ENST00000335508	SF3B1.aAug10	uc002uue.2	2.02269	2.37508	5.46367	41.9068	1.19201e-28	1.32025e-25
2:151326752:+,2:151328141:+	RND3	core	NM_001254738,NM_005168	ENST00000263895,ENST00000375734,ENST00000409557,ENST00000466334,ENST00000473639,ENST00000497865	RND3.aAug10,RND3.bAug10,RND3.cAug10,RND3.dAug10,RND3.iAug10,RND3.jAug10	uc002txe.2,uc002txf.2,uc002txg.2	1.9822	2.54708	5.70893	41.8344	1.2558e-28	1.37642e-25
14:91943330:+,14:91947920:+	SMEK1	core	NM_032560	ENST00000337238,ENST00000417249,ENST00000554308,ENST00000554390,ENST00000554574,ENST00000554684,ENST00000554943,ENST00000555470	SMEK1.aAug10,SMEK1.bAug10,SMEK1.cAug10,SMEK1.fAug10,SMEK1.gAug10	uc001xzm.2,uc001xzn.2,uc001xzo.2,uc001xzp.1,uc001xzq.1	3.02269	3.08203	4.41329	41.5933	1.49503e-28	1.57547e-25
12:69956054:+,12:69962785:+	FRS2	core	NM_001042555,NM_006654	ENST00000299293,ENST00000397997,ENST00000547219,ENST00000548154,ENST00000549092,ENST00000549921,ENST00000550169,ENST00000550316,ENST00000550389,ENST00000550937,ENST00000551325	FRS2.aAug10,FRS2.bAug10,FRS2.cAug10,FRS2.dAug10,FRS2.eAug10,FRS2.gAug10,FRS2.hAug10,FRS2.iAug10,FRS2.jAug10,FRS2.kAug10	uc001suy.2,uc001suz.2,uc009zrj.2,uc009zrk.2	1.09463	2.76024	5.92683	41.5913	1.49729e-28	1.57547e-25
14:52118714:+,14:52156409:+	FRMD6	core	NM_152330	ENST00000344768,ENST00000395718	FRMD6.aAug10,FRMD6.bAug10,FRMD6.hAug10	uc001wzc.2,uc001wzd.2	2.63454	3.24161	4.85674	41.4266	1.68761e-28	1.75814e-25
2:216290008:+,2:216292903:+	FN1	core	NM_002026,NM_054034,NM_212474,NM_212476,NM_212478,NM_212482	ENST00000265313,ENST00000323926,ENST00000336916,ENST00000345488,ENST00000346544,ENST00000354785,ENST00000356005,ENST00000357009,ENST00000357867,ENST00000359671,ENST00000421182,ENST00000426059,ENST00000432072,ENST00000443816,ENST00000446046	FN1.aAug10,FN1.bAug10,FN1.cAug10,FN1.dAug10,FN1.eAug10,FN1.fAug10,FN1.gAug10,FN1.hAug10,FN1.iAug10,FN1.jAug10,FN1.lAug10	uc002vfa.2,uc002vfb.2,uc002vfc.2,uc002vfd.2,uc002vfe.2,uc002vff.2,uc002vfg.2,uc002vfh.2,uc002vfi.2,uc002vfj.2,uc002vfl.2	1.9726	2.15171	7.32162	41.2897	1.86481e-28	1.9237e-25
12:49099679:+,12:49108226:+	CCNT1	core	NM_001240	ENST00000261900,ENST00000417344,ENST00000550457	CCNT1_.aAug10,CCNT1_.hAug10,CCNT1_.oAug10	uc001rse.1,uc009zkz.1	1.35092	2.44046	5.66413	41.124	2.10515e-28	2.15054e-25
14:52192588:+,14:52194463:+	FRMD6	core	NM_001042481,NM_152330	ENST00000344768,ENST00000356218,ENST00000395718,ENST00000553556,ENST00000554167,ENST00000557522	FRMD6.aAug10,FRMD6.bAug10,FRMD6.cAug10,FRMD6.dAug10,FRMD6.eAug10,FRMD6.gAug10	uc001wzb.2,uc001wzc.2,uc001wzd.2,uc001wze.2,uc001wzf.2,uc001wzg.2	2.63454	2.92299	5.25675	40.8912	2.49823e-28	2.47987e-25
2:151331498:+,2:151343208:+	RND3	core	NM_001254738,NM_005168	ENST00000263895,ENST00000375734,ENST00000439275,ENST00000454202,ENST00000472416,ENST00000497865	RND3.aAug10,RND3.bAug10,RND3.cAug10,RND3.dAug10,RND3.eAug10,RND3.fAug10,RND3.gAug10,RND3.hAug10	uc002txe.2,uc002txf.2,uc002txg.2,uc010zbv.1,uc010zbw.1	1.9822	2.30904	5.56982	40.8371	2.59994e-28	2.53304e-25
7:108212387:+,7:108213343:+	DNAJB9	core	NM_012328	ENST00000249356	DNAJB9.aAug10,DNAJB9.cAug10	uc003vfn.2	3.26131	3.24747	4.32083	40.7646	2.7431e-28	2.648e-25
14:52182217:+,14:52186773:+	FRMD6	core	NM_001042481,NM_152330	ENST00000344768,ENST00000356218,ENST00000395718,ENST00000554167,ENST00000555197,ENST00000557522	FRMD6.aAug10,FRMD6.bAug10,FRMD6.cAug10,FRMD6.dAug10,FRMD6.eAug10,FRMD6.fAug10	uc001wzb.2,uc001wzc.2,uc001wzd.2,uc001wze.2,uc001wzf.2	2.63454	2.92524	4.71157	40.6248	3.04236e-28	2.91018e-25
12:48358206:+,12:48361916:+	TMEM106C	extended	None	ENST00000549288	TMEM106C.vaAug10	None	0.0941049	3.47947	3.69105	40.126	4.41476e-28	4.14754e-25
13:45914319:+,13:45915177:+	TPT1	extended	None	ENST00000379056,ENST00000490277	TPT1andSNORA31.iAug10,TPT1andSNORA31.oAug10,TPT1andSNORA31.pAug10	uc001uzz.1	1.1079	3.17363	4.13191	40.0801	4.5697e-28	4.25512e-25
2:38972329:+,2:38973836:+	SRSF7	core	NM_001195446	ENST00000446327,ENST00000452806	SRSF7.cAug10,SRSF7.hAug10,SRSF7.lAug10	uc010ynp.1	0.857893	3.6137	3.78727	40.05	4.67411e-28	4.31416e-25
20:34328809:+,20:34329863:+	RBM39	core	NM_001242599,NM_001242600,NM_004902,NM_184234,NR_040722,NR_040723,NR_040724	ENST00000253363,ENST00000338163,ENST00000361162,ENST00000374038,ENST00000397370,ENST00000403542,ENST00000407261,ENST00000412738,ENST00000416529,ENST00000427743,ENST00000429968,ENST00000433027,ENST00000442447,ENST00000444878,ENST00000453310,ENST00000455343,ENST00000461849,ENST00000463004,ENST00000463098,ENST00000528062	RBM39.aAug10,RBM39.bAug10,RBM39.cAug10,RBM39.eAug10,RBM39.fAug10,RBM39.gAug10,RBM39.hAug10,RBM39.iAug10,RBM39.jAug10,RBM39.kAug10,RBM39.lAug10,RBM39.mAug10,RBM39.nAug10,RBM39.oAug10,RBM39.tAug10,RBM39.vbAug10,RBM39.vcAug10,RBM39.vgAug10,RBM39.vhAug10,RBM39.vkAug10,RBM39.vnAug10,RBM39.vqAug10,RBM39.vsAug10,RBM39.vuAug10,RBM39.vvAug10,RBM39.vxAug10,RBM39.vyAug10,RBM39.vzAug10,RBM39.waAug10,RBM39.wh…	uc002xea.2,uc002xeb.2,uc002xec.2,uc002xed.2,uc002xee.2,uc002xef.2,uc002xeg.2,uc010gfn.2,uc010zvm.1,uc010zvn.1	0.714398	2.39904	5.23188	39.6347	6.39811e-28	5.85404e-25
2:238275929:+,2:238277206:+	COL6A3	core	NM_004369,NM_057166,NM_057167	ENST00000295550,ENST00000346358,ENST00000347401,ENST00000353578,ENST00000409809,ENST00000472056	COL6A3.aAug10,COL6A3.bAug10,COL6A3.cAug10,COL6A3.lAug10	uc002vwl.2,uc002vwo.2,uc010znj.1	2.01483	2.04266	5.81828	39.5365	6.89469e-28	6.20056e-25
14:91929221:+,14:91931594:+	SMEK1	core	NM_032560	ENST00000337238,ENST00000428424,ENST00000554308,ENST00000554390,ENST00000554684,ENST00000554943,ENST00000555462,ENST00000555718	SMEK1.aAug10,SMEK1.bAug10,SMEK1.cAug10,SMEK1.dAug10,SMEK1.eAug10,SMEK1.fAug10,SMEK1.hAug10	uc001xzm.2,uc001xzn.2,uc001xzo.2,uc001xzp.1,uc010atz.2	3.02269	2.92634	4.40063	39.514	7.01363e-28	6.25408e-25
12:69964297:+,12:69965056:+	FRS2	core	NM_001042555,NM_006654	ENST00000299293,ENST00000397997,ENST00000549921,ENST00000550389,ENST00000550937,ENST00000551325	FRS2.aAug10,FRS2.bAug10,FRS2.cAug10,FRS2.dAug10,FRS2.eAug10	uc001suy.2,uc001suz.2,uc009zrj.2,uc009zrk.2	1.09463	2.49257	6.04991	39.4314	7.4696e-28	6.60469e-25
12:69924740:+,12:69925794:+	FRS2	core	NM_001042555,NM_006654	ENST00000299293,ENST00000397997,ENST00000547219,ENST00000547414,ENST00000548154,ENST00000549092,ENST00000549921,ENST00000550169,ENST00000550316,ENST00000550937	FRS2.aAug10,FRS2.cAug10,FRS2.dAug10,FRS2.fAug10,FRS2.gAug10,FRS2.hAug10,FRS2.iAug10,FRS2.jAug10,FRS2.kAug10,FRS2.lAug10	uc001suy.2,uc001suz.2,uc009zrj.2	1.09463	2.4879	6.20109	39.2383	8.65974e-28	7.53047e-25
14:52167877:+,14:52169230:+	FRMD6	extended	None	ENST00000344768,ENST00000555936	FRMD6.aAug10,FRMD6.iAug10,FRMD6.kAug10	uc001wzd.2	2.63454	3.04277	4.04143	39.0915	9.69363e-28	8.30265e-25
14:91925213:+,14:91927725:+	SMEK1	core	NM_032560	ENST00000337238,ENST00000428424,ENST00000554684,ENST00000554943,ENST00000555462,ENST00000555718,ENST00000557382	SMEK1.aAug10,SMEK1.bAug10,SMEK1.cAug10,SMEK1.dAug10,SMEK1.eAug10,SMEK1.hAug10,SMEK1.jAug10	uc001xzm.2,uc001xzn.2,uc001xzo.2,uc010atz.2	3.02269	2.73497	4.41238	39.09	9.70554e-28	8.30265e-25
12:57910963:+,12:57911052:+	DDIT3	core	NM_001195053,NM_001195054,NM_001195055,NM_001195056,NM_001195057,NM_004083	ENST00000346473,ENST00000547303,ENST00000547526,ENST00000551116,ENST00000552740	DDIT3.aAug10,DDIT3.bAug10,DDIT3.cAug10,DDIT3.dAug10,DDIT3.eAug10,DDIT3.fAug10,DDIT3.hAug10,DDIT3.iAug10,DDIT3.jAug10	uc001soi.2,uc009zps.2,uc009zpt.2	1.96158	3.27992	4.35558	39.0563	9.96077e-28	8.45228e-25
14:91952074:+,14:91957091:+	SMEK1	core	NM_032560	ENST00000337238,ENST00000554308,ENST00000554390,ENST00000554511,ENST00000554684,ENST00000554943,ENST00000557018	SMEK1.aAug10,SMEK1.bAug10,SMEK1.iAug10	uc001xzm.2,uc001xzn.2,uc001xzo.2,uc001xzp.1	3.02269	3.31844	4.09806	38.4952	1.53951e-27	1.2755e-24
14:52188798:+,14:52192497:+	FRMD6	core	NM_001042481,NM_152330	ENST00000344768,ENST00000356218,ENST00000395718,ENST00000553556,ENST00000554167,ENST00000555703,ENST00000557522	FRMD6.aAug10,FRMD6.bAug10,FRMD6.cAug10,FRMD6.dAug10,FRMD6.eAug10,FRMD6.gAug10,FRMD6.jAug10	uc001wzb.2,uc001wzc.2,uc001wzd.2,uc001wze.2,uc001wzf.2,uc001wzg.2	2.63454	2.88945	5.07431	38.3628	1.70761e-27	1.39542e-24
2:238273071:+,2:238274341:+	COL6A3	core	NM_004369,NM_057166,NM_057167	ENST00000295550,ENST00000346358,ENST00000347401,ENST00000353578,ENST00000409809,ENST00000472056	COL6A3.aAug10,COL6A3.bAug10,COL6A3.cAug10	uc002vwl.2,uc002vwo.2,uc010znj.1	2.01483	2.03695	5.74774	38.0739	2.14345e-27	1.69576e-24
1:68152270:+,1:68153344:+	GADD45A	core	NM_001199741,NM_001924	ENST00000370985,ENST00000370986	GADD45A.aAug10,GADD45A.bAug10,GADD45A.cAug10	uc001ddz.1,uc009wbb.1	2.50289	3.36273	3.9926	38.0487	2.18659e-27	1.71698e-24
2:238277820:+,2:238280375:+	COL6A3	core	NM_004369,NM_057166,NM_057167	ENST00000295550,ENST00000346358,ENST00000347401,ENST00000353578,ENST00000409809,ENST00000472056	COL6A3.aAug10,COL6A3.bAug10,COL6A3.cAug10	uc002vwl.2,uc002vwo.2,uc010znj.1	2.01483	2.1873	5.80521	38.0234	2.23078e-27	1.7387e-24
21:34941393:+,21:34945614:+	SON	core	NM_138927	ENST00000356577,ENST00000381692,ENST00000436227	SON.aAug10,SON.dAug10,SON.eAug10	uc002ysd.2,uc002yse.1,uc002ysf.1	2.34302	2.64416	4.57698	37.9134	2.43379e-27	1.88298e-24
14:52178314:+,14:52179201:+	FRMD6	core	NM_001042481,NM_152330	ENST00000344768,ENST00000356218,ENST00000395718,ENST00000554167,ENST00000554495,ENST00000557183	FRMD6.aAug10,FRMD6.bAug10,FRMD6.cAug10,FRMD6.dAug10,FRMD6.fAug10,FRMD6.qAug10	uc001wzb.2,uc001wzc.2,uc001wzd.2,uc001wze.2	2.63454	2.95341	4.34101	37.8727	2.51367e-27	1.93059e-24
12:69965214:+,12:69965898:+	FRS2	core	NM_001042555,NM_006654	ENST00000299293,ENST00000397997,ENST00000549921,ENST00000550389,ENST00000551325	FRS2.aAug10,FRS2.bAug10,FRS2.cAug10,FRS2.dAug10,FRS2.eAug10	uc001suy.2,uc001suz.2,uc009zrj.2,uc009zrk.2	1.09463	2.4445	6.5148	37.8088	2.6444e-27	2.01628e-24
14:91927951:+,14:91928393:+	SMEK1	core	NM_032560	ENST00000337238,ENST00000428424,ENST00000554308,ENST00000554684,ENST00000554943,ENST00000555462,ENST00000555718	SMEK1.aAug10,SMEK1.bAug10,SMEK1.cAug10,SMEK1.dAug10,SMEK1.eAug10,SMEK1.hAug10	uc001xzm.2,uc001xzn.2,uc001xzo.2,uc010atz.2	3.02269	2.87109	4.1045	37.6887	2.90994e-27	2.18704e-24
2:238305490:+,2:238322596:+	COL6A3	core	NM_004369,NM_057164,NM_057165,NM_057166,NM_057167	ENST00000295550,ENST00000346358,ENST00000347401,ENST00000353578,ENST00000392003,ENST00000392004,ENST00000433762,ENST00000472056	COL6A3.aAug10,COL6A3.bAug10,COL6A3.cAug10,COL6A3.dAug10,COL6A3.eAug10,COL6A3.fAug10	uc002vwl.2,uc002vwo.2,uc002vwq.2,uc002vwr.2,uc010znj.1,uc010znk.1	2.01483	2.29198	5.3329	37.4774	3.4454e-27	2.53516e-24
2:238287878:+,2:238289558:+	COL6A3	core	NM_004369,NM_057164,NM_057165,NM_057167	ENST00000295550,ENST00000347401,ENST00000353578,ENST00000392003,ENST00000392004,ENST00000409809	COL6A3.aAug10,COL6A3.bAug10,COL6A3.dAug10,COL6A3.eAug10	uc002vwl.2,uc002vwo.2,uc002vwq.2,uc002vwr.2	2.01483	2.31223	5.15174	37.4485	3.52635e-27	2.55894e-24
14:52169306:+,14:52171467:+	FRMD6	core	NM_001042481,NM_152330	ENST00000344768,ENST00000356218,ENST00000395718,ENST00000554167,ENST00000555936,ENST00000557405	FRMD6.aAug10,FRMD6.bAug10,FRMD6.cAug10,FRMD6.dAug10,FRMD6.hAug10,FRMD6.iAug10,FRMD6.lAug10	uc001wzb.2,uc001wzc.2,uc001wzd.2,uc001wze.2	2.63454	2.94719	4.75746	37.4166	3.61776e-27	2.58955e-24
15:69745359:+,15:69747509:+	RPLP1	core	NM_213725	ENST00000357790	RPLP1.bAug10	uc002ase.1	1.48894	2.66669	4.66076	37.2006	4.30507e-27	2.98806e-24
14:52164950:+,14:52167774:+	FRMD6	core	NM_001042481,NM_152330	ENST00000344768,ENST00000356218,ENST00000395718,ENST00000554167,ENST00000555936	FRMD6.aAug10,FRMD6.bAug10,FRMD6.cAug10,FRMD6.dAug10,FRMD6.hAug10,FRMD6.iAug10,FRMD6.kAug10,FRMD6.lAug10,FRMD6.pAug10	uc001wzb.2,uc001wzc.2,uc001wzd.2,uc001wze.2	2.63454	2.75524	4.57026	37.1169	4.60639e-27	3.1679e-24
2:238283663:+,2:238285415:+	COL6A3	core	NM_004369,NM_057164,NM_057165,NM_057166,NM_057167	ENST00000295550,ENST00000346358,ENST00000347401,ENST00000353578,ENST00000392003,ENST00000392004,ENST00000409809,ENST00000472056	COL6A3.aAug10,COL6A3.bAug10,COL6A3.cAug10,COL6A3.dAug10,COL6A3.eAug10	uc002vwl.2,uc002vwo.2,uc002vwq.2,uc002vwr.2,uc010znj.1	2.01483	2.07756	5.59696	36.9282	5.36856e-27	3.64442e-24
14:91937339:+,14:91939377:+	SMEK1	core	NM_032560	ENST00000337238,ENST00000428424,ENST00000554308,ENST00000554390,ENST00000554684,ENST00000554943,ENST00000555462	SMEK1.aAug10,SMEK1.bAug10,SMEK1.cAug10,SMEK1.dAug10,SMEK1.hAug10	uc001xzm.2,uc001xzn.2,uc001xzo.2,uc001xzp.1,uc010atz.2	3.02269	3.11804	4.05699	36.8929	5.52493e-27	3.72653e-24
14:52171653:+,14:52174796:+	FRMD6	core	NM_001042481,NM_152330	ENST00000344768,ENST00000356218,ENST00000395718,ENST00000554167,ENST00000554495,ENST00000555936,ENST00000557405	FRMD6.aAug10,FRMD6.bAug10,FRMD6.cAug10,FRMD6.dAug10,FRMD6.hAug10,FRMD6.iAug10,FRMD6.qAug10	uc001wzb.2,uc001wzc.2,uc001wzd.2,uc001wze.2	2.63454	3.10585	4.52009	36.7788	6.06353e-27	4.03804e-24
20:60883234:+,20:60883711:+	ADRM1	extended	None	None	ADRM1.dAug10,ADRM1.kAug10	None	-0.231057	4.08553	3.09615	36.5687	7.20136e-27	4.70642e-24
12:69042561:+,12:69047892:+	RAP1B	core	NM_001251917,NM_001251918	ENST00000450214,ENST00000539091	RAP1B.gAug10,RAP1B.hAug10	uc010stg.1,uc010sth.1	2.15265	4.71942	2.90252	36.3963	8.29868e-27	5.35703e-24
14:91942310:+,14:91942752:+	SMEK1	core	NM_032560	ENST00000337238,ENST00000417249,ENST00000428424,ENST00000554308,ENST00000554390,ENST00000554574,ENST00000554684,ENST00000554943,ENST00000555029,ENST00000555462,ENST00000555470	SMEK1.aAug10,SMEK1.bAug10,SMEK1.cAug10,SMEK1.dAug10,SMEK1.fAug10,SMEK1.gAug10,SMEK1.hAug10	uc001xzm.2,uc001xzn.2,uc001xzo.2,uc001xzp.1,uc001xzq.1,uc010atz.2	3.02269	3.10925	3.92486	36.2768	9.15979e-27	5.84123e-24
21:34931682:+,21:34931893:+	SON	core	NM_032195,NM_138927	ENST00000290239,ENST00000300278,ENST00000356577,ENST00000381692,ENST00000421541,ENST00000436227,ENST00000455528	SON.aAug10,SON.bAug10,SON.cAug10,SON.dAug10,SON.eAug10,SON.fAug10	uc002ysc.2,uc002ysd.2,uc002yse.1,uc002ysf.1,uc002ysg.2	2.34302	2.26098	4.81949	36.1648	1.005e-26	6.33214e-24
14:73566458:+,14:73569900:+	RBM25	core	NM_021239	ENST00000261973,ENST00000527432,ENST00000528081	RBM25.aAug10,RBM25.bAug10,RBM25.cAug10	uc001xno.2,uc001xnp.2,uc010ttu.1	2.1353	3.01698	3.72243	35.9314	1.22046e-26	7.33817e-24
2:198281635:+,2:198283233:+	SF3B1	core	NM_012433	ENST00000335508,ENST00000409915,ENST00000470268,ENST00000482158	SF3B1.aAug10,SF3B1.bAug10,SF3B1.eAug10,SF3B1.gAug10	uc002uue.2,uc010fsk.1	2.02269	2.05862	5.21158	35.886	1.2676e-26	7.57828e-24
14:91942868:+,14:91943253:+	SMEK1	core	NM_032560	ENST00000337238,ENST00000417249,ENST00000428424,ENST00000554308,ENST00000554390,ENST00000554574,ENST00000554684,ENST00000554943,ENST00000555029,ENST00000555462	SMEK1.aAug10,SMEK1.bAug10,SMEK1.cAug10,SMEK1.dAug10,SMEK1.fAug10	uc001xzm.2,uc001xzn.2,uc001xzo.2,uc001xzp.1,uc001xzq.1,uc010atz.2	3.02269	3.19622	3.92773	35.8275	1.33121e-26	7.82523e-24
3:101400059:+,3:101401615:+	RPL24	extended	None	ENST00000495401	RPL24.fAug10	uc003dvi.1	0.829993	5.08752	3.25833	35.642	1.5554e-26	8.70537e-24
2:151343295:+,2:151343782:+	RND3	core	NM_001254738,NM_005168	ENST00000263895,ENST00000375734,ENST00000439275,ENST00000454202	RND3.aAug10,RND3.bAug10,RND3.cAug10,RND3.eAug10,RND3.fAug10,RND3.gAug10	uc002txe.2,uc002txf.2,uc002txg.2,uc010zbv.1	1.9822	2.15016	5.62515	35.4541	1.82249e-26	9.93599e-24
7:139086993:+,7:139090390:+	LUC7L2	core	NM_001244584,NM_001244585,NM_016019	ENST00000263545,ENST00000354926,ENST00000448820,ENST00000456182,ENST00000463912,ENST00000498518,ENST00000541170,ENST00000541515,ENST00000545899	C7orf55andLUC7L2.aAug10,C7orf55andLUC7L2.bAug10,C7orf55andLUC7L2.cAug10,C7orf55andLUC7L2.dAug10,C7orf55andLUC7L2.eAug10,C7orf55andLUC7L2.fAug10,C7orf55andLUC7L2.gAug10	uc003vux.2,uc003vuy.2,uc003vuz.1,uc003vva.2,uc011kqs.1,uc011kqt.1	2.09533	2.03916	5.28907	35.3524	1.98631e-26	1.0718e-23
11:118888255:+,11:118888992:+	RPS25	extended	None	None	RPS25.cAug10	None	1.1088	5.73259	2.81329	35.2875	2.09892e-26	1.11727e-23
16:56976149:+,16:56977038:+	HERPUD1	core	NM_001010989,NM_001010990,NM_014685	ENST00000300302,ENST00000344114,ENST00000379792,ENST00000439977	HERPUD1.aAug10,HERPUD1.bAug10,HERPUD1.cAug10,HERPUD1.dAug10,HERPUD1.eAug10,HERPUD1.gAug10,HERPUD1.iAug10,HERPUD1.nAug10,HERPUD1.uAug10	uc002eke.1,uc002ekf.1,uc002ekg.1,uc002ekh.1,uc010cco.1,uc010ccp.1	2.18223	2.41597	4.92732	35.1267	2.40678e-26	1.2475e-23
2:105977891:+,2:105979742:+	FHL2	core	NM_001039492,NM_001450,NM_201555,NM_201557	ENST00000322142,ENST00000336660,ENST00000344213,ENST00000358129,ENST00000393352,ENST00000393353,ENST00000408995,ENST00000409177,ENST00000409807,ENST00000530340	FHL2.aAug10,FHL2.bAug10,FHL2.cAug10,FHL2.dAug10,FHL2.eAug10,FHL2.fAug10,FHL2.gAug10,FHL2.hAug10,FHL2.kAug10,FHL2.lAug10	uc002tct.2,uc002tcu.2,uc002tcv.2,uc002tcw.2,uc002tcx.2,uc002tcy.2,uc002tcz.2,uc002tda.2,uc002tdb.2,uc002tdc.2,uc002tdd.2,uc010fje.2	2.92614	3.4087	3.42248	35.0906	2.4821e-26	1.27399e-23
4:114824831:+,4:114899593:+	ARSJ	core	NM_024590	ENST00000315366,ENST00000541197	ARSJ.aAug10,ARSJ.bAug10,ARSJ.cAug10	uc003ibq.1,uc010imu.1	3.33927	3.33784	3.38314	34.9936	2.69666e-26	1.37075e-23
12:69044248:+,12:69047892:+	RAP1B	core	NM_001251921	ENST00000540209	None	uc010stf.1	2.15265	9.72625	3.91646	34.9069	2.90454e-26	1.44843e-23	Figure 5D
6:64288933:+,6:64289162:+	PTP4A1	core	NM_003463	ENST00000370651	PTP4A1.aAug10,PTP4A1.bAug10	uc003pek.2,uc003pel.2	2.29285	2.33425	4.62413	34.8153	3.1425e-26	1.5597e-23
2:238285987:+,2:238287279:+	COL6A3	core	NM_004369,NM_057164,NM_057165,NM_057167	ENST00000295550,ENST00000347401,ENST00000353578,ENST00000392003,ENST00000392004,ENST00000409809	COL6A3.aAug10,COL6A3.bAug10,COL6A3.dAug10,COL6A3.eAug10	uc002vwl.2,uc002vwo.2,uc002vwq.2,uc002vwr.2	2.01483	2.13414	5.22863	34.5682	3.88957e-26	1.90356e-23
6:64286890:+,6:64288342:+	PTP4A1	core	NM_003463	ENST00000370644,ENST00000370650,ENST00000370651	PTP4A1.aAug10,PTP4A1.bAug10	uc003pek.2,uc003pel.2	2.29285	2.38432	4.4791	34.4526	4.29981e-26	2.0565e-23
17:62587267:+,17:62589558:+	SMURF2	core	NM_022739	ENST00000262435	SMURF2.aAug10,SMURF2.bAug10,SMURF2.cAug10,SMURF2.fAug10,SMURF2.nAug10	uc002jep.1,uc002jeq.1,uc002jer.1	1.18703	2.47753	4.2812	34.427	4.39668e-26	2.09332e-23
6:64282624:+,6:64286341:+	PTP4A1	core	NM_003463	ENST00000370650,ENST00000370651	PTP4A1.aAug10	uc003pel.2	2.29285	2.49702	4.16958	34.2039	5.34102e-26	2.45409e-23
20:480578:+,20:485762:+	CSNK2A1	core	NM_001895,NM_177559,NM_177560	ENST00000217244,ENST00000349736,ENST00000381973,ENST00000400217,ENST00000400227,ENST00000460062	CSNK2A1.aAug10,CSNK2A1.bAug10,CSNK2A1.cAug10,CSNK2A1.dAug10,CSNK2A1.eAug10,CSNK2A1.gAug10,CSNK2A1.hAug10,CSNK2A1.iAug10,CSNK2A1.kAug10,CSNK2A1.lAug10,CSNK2A1.vbAug10	uc002wdw.1,uc002wdx.1,uc002wdy.1	1.86031	2.0913	4.93012	34.1167	5.76492e-26	2.61461e-23
19:18497276:+,19:18499096:+	GDF15	core	NM_004864	ENST00000252809	GDF15.aAug10,GDF15.bAug10	uc002niv.2	3.21549	3.21606	4.34311	34.0904	5.89945e-26	2.65276e-23
1:226349390:+,1:226352490:+	ACBD3	core	NM_022735	ENST00000366812	ACBD3.aAug10	uc001hpy.2	2.47828	2.52072	4.10453	34.0791	5.95833e-26	2.66727e-23
14:91928583:+,14:91929079:+	SMEK1	core	NM_032560	ENST00000337238,ENST00000428424,ENST00000554308,ENST00000554390,ENST00000554684,ENST00000554943,ENST00000555462	SMEK1.aAug10,SMEK1.bAug10,SMEK1.cAug10,SMEK1.dAug10,SMEK1.fAug10,SMEK1.hAug10	uc001xzm.2,uc001xzn.2,uc001xzo.2,uc001xzp.1,uc010atz.2	3.02269	2.37826	4.49684	34.0745	5.9824e-26	2.66727e-23
2:105979928:+,2:105984027:+	FHL2	core	NM_001039492,NM_001450,NM_201555,NM_201557	ENST00000322142,ENST00000336660,ENST00000344213,ENST00000358129,ENST00000393352,ENST00000393353,ENST00000408995,ENST00000409177,ENST00000409807,ENST00000452732,ENST00000530340	FHL2.aAug10,FHL2.bAug10,FHL2.cAug10,FHL2.dAug10,FHL2.eAug10,FHL2.fAug10,FHL2.gAug10,FHL2.hAug10,FHL2.iAug10,FHL2.jAug10,FHL2.kAug10,FHL2.lAug10,FHL2.rAug10	uc002tct.2,uc002tcu.2,uc002tcv.2,uc002tcw.2,uc002tcx.2,uc002tcy.2,uc002tcz.2,uc002tda.2,uc002tdb.2,uc002tdc.2,uc002tdd.2,uc010fje.2	2.92614	3.40549	3.50487	34.0671	6.02143e-26	2.67334e-23
14:52156653:+,14:52164860:+	FRMD6	core	NM_001042481,NM_152330	ENST00000344768,ENST00000356218,ENST00000395718,ENST00000554778	FRMD6.aAug10,FRMD6.bAug10,FRMD6.cAug10,FRMD6.hAug10,FRMD6.kAug10,FRMD6.lAug10,FRMD6.pAug10,FRMD6.rAug10,FRMD6.uAug10	uc001wzb.2,uc001wzc.2,uc001wzd.2	2.63454	2.70009	4.40509	34.0479	6.12381e-26	2.70737e-23
12:69962876:+,12:69964111:+	FRS2	core	NM_001042555,NM_006654	ENST00000299293,ENST00000397997,ENST00000547219,ENST00000548154,ENST00000549092,ENST00000549921,ENST00000550389,ENST00000550937,ENST00000551325	FRS2.aAug10,FRS2.bAug10,FRS2.cAug10,FRS2.dAug10,FRS2.eAug10,FRS2.gAug10,FRS2.hAug10	uc001suy.2,uc001suz.2,uc009zrj.2,uc009zrk.2	1.09463	2.35803	5.94254	34.0021	6.37585e-26	2.79531e-23
12:49094856:+,12:49099551:+	CCNT1	core	NM_001240	ENST00000261900,ENST00000417344	CCNT1_.aAug10,CCNT1_.hAug10	uc001rse.1,uc009zkz.1	1.35092	2.44462	5.72034	33.9024	6.96106e-26	2.98959e-23
7:139092096:+,7:139094309:+	LUC7L2	core	NM_001244584,NM_001244585,NM_016019	ENST00000263545,ENST00000354926,ENST00000456182,ENST00000463912,ENST00000498518,ENST00000541170,ENST00000541515,ENST00000545899	C7orf55andLUC7L2.aAug10,C7orf55andLUC7L2.bAug10,C7orf55andLUC7L2.cAug10,C7orf55andLUC7L2.dAug10,C7orf55andLUC7L2.eAug10,C7orf55andLUC7L2.fAug10,C7orf55andLUC7L2.gAug10	uc003vux.2,uc003vuy.2,uc003vuz.1,uc003vva.2,uc011kqs.1,uc011kqt.1	2.09533	2.06915	4.99616	33.8864	7.05979e-26	3.01967e-23
1:24975520:+,1:24976462:+	SRRM1	core	NM_005839	ENST00000323848,ENST00000374389,ENST00000447431,ENST00000462710,ENST00000468822,ENST00000478890,ENST00000479034,ENST00000490543,ENST00000494934,ENST00000495561,ENST00000537199	SRRM1.aAug10,SRRM1.bAug10,SRRM1.cAug10,SRRM1.dAug10,SRRM1.eAug10,SRRM1.fAug10,SRRM1.iAug10,SRRM1.kAug10,SRRM1.mAug10,SRRM1.uAug10,SRRM1.vbAug10,SRRM1.veAug10	uc001bjm.2,uc009vrh.1,uc009vri.1,uc010oel.1,uc010oem.1	2.73355	2.57562	4.02206	33.8304	7.41807e-26	3.10971e-23
2:238280980:+,2:238283055:+	COL6A3	core	NM_004369,NM_057164,NM_057165,NM_057166,NM_057167	ENST00000295550,ENST00000346358,ENST00000347401,ENST00000353578,ENST00000392003,ENST00000392004,ENST00000409809,ENST00000472056	COL6A3.aAug10,COL6A3.bAug10,COL6A3.cAug10,COL6A3.dAug10,COL6A3.eAug10	uc002vwl.2,uc002vwo.2,uc002vwq.2,uc002vwr.2,uc010znj.1	2.01483	2.22685	5.04222	33.6765	8.50203e-26	3.40149e-23
11:93472497:+,11:93474488:+	TAF1D	core	NM_024116	ENST00000323981,ENST00000448108,ENST00000526015,ENST00000527169,ENST00000529508,ENST00000532235,ENST00000534770	TAF1_.aAug10,TAF1_.bAug10,TAF1_.cAug10,TAF1_.dAug10,TAF1_.eAug10,TAF1_.fAug10,TAF1_.hAug10,TAF1_.qAug10,TAF1_.vkAug10,TAF1_.vqAug10	uc001pdz.2,uc001pea.1,uc001ped.2	1.99884	2.64939	3.92702	33.6091	9.02625e-26	3.53067e-23
6:132272132:+,6:132272247:+	CTGF	core	NM_001901	ENST00000367976	CTGF.aAug10,CTGF.bAug10,CTGF.dAug10	uc003qcz.2	2.01013	2.25381	4.59359	33.5898	9.18264e-26	3.54688e-23
7:45022921:+,7:45023421:+	C7orf40	core	NR_003697	ENST00000438705	C7orf40andSNORA9.aAug10,C7orf40andSNORA9.dAug10,C7orf40andSNORA9.eAug10,C7orf40andSNORA9.fAug10,C7orf40andSNORA9.gAug10,C7orf40andSNORA9.hAug10,C7orf40andSNORA9.jAug10	uc003tmk.3,uc003tml.3	1.44389	2.69245	4.47128	33.5857	9.21604e-26	3.54688e-23
6:64288434:+,6:64288803:+	PTP4A1	core	NM_003463	ENST00000370644,ENST00000370650,ENST00000370651	PTP4A1.aAug10,PTP4A1.bAug10,PTP4A1.gAug10	uc003pek.2,uc003pel.2	2.29285	2.4092	4.48309	33.4232	1.06547e-25	3.94326e-23
16:3070492:+,16:3071556:+	TNFRSF12A	extended	None	ENST00000341627	TNFRSF12A.eAug10	uc002csw.3	-1.33638	3.50654	3.24226	33.4092	1.07885e-25	3.96916e-23
11:93470405:+,11:93471275:+	TAF1D	core	NM_024116	ENST00000323981,ENST00000448108,ENST00000526015,ENST00000527068,ENST00000527169,ENST00000534770	TAF1_.aAug10,TAF1_.bAug10,TAF1_.cAug10,TAF1_.dAug10,TAF1_.eAug10,TAF1_.fAug10,TAF1_.hAug10,TAF1_.iAug10,TAF1_.jAug10,TAF1_.qAug10	uc001pdz.2,uc001pea.1,uc001ped.2	1.99884	2.39649	4.46202	33.4	1.08779e-25	3.98808e-23
12:54674606:+,12:54675579:+	HNRNPA1,HNRNPA1P10	novel	NONE	NONE	NONE	NONE	1.36094	9.00351	3.14516	33.3734	1.11402e-25	4.03124e-23
16:56974157:+,16:56976044:+	HERPUD1	core	NM_001010989,NM_001010990,NM_014685	ENST00000300302,ENST00000379792,ENST00000439977	HERPUD1.aAug10,HERPUD1.bAug10,HERPUD1.cAug10,HERPUD1.dAug10,HERPUD1.hAug10,HERPUD1.iAug10,HERPUD1.nAug10	uc002eke.1,uc002ekf.1,uc002ekg.1,uc002ekh.1	2.18223	2.19265	4.50725	33.3411	1.14673e-25	4.11244e-23
17:62577109:+,17:62579579:+	SMURF2	core	NM_022739	ENST00000262435	SMURF2.aAug10,SMURF2.bAug10,SMURF2.cAug10	uc002jep.1,uc002jeq.1,uc002jer.1	1.18703	2.50556	4.18601	33.3324	1.1557e-25	4.11244e-23
14:91939479:+,14:91939583:+	SMEK1	core	NM_032560	ENST00000337238,ENST00000428424,ENST00000554308,ENST00000554390,ENST00000554684,ENST00000554943,ENST00000555462	SMEK1.aAug10,SMEK1.bAug10,SMEK1.cAug10,SMEK1.dAug10,SMEK1.hAug10	uc001xzm.2,uc001xzn.2,uc001xzo.2,uc001xzp.1,uc010atz.2	3.02269	3.14551	3.85365	33.2162	1.28276e-25	4.48382e-23
2:238290142:+,2:238305370:+	COL6A3	core	NM_057164,NM_057166	ENST00000392003,ENST00000472056	COL6A3.cAug10,COL6A3.eAug10	uc002vwr.2,uc010znj.1	2.01483	2.21185	4.93475	33.2126	1.28692e-25	4.48382e-23
14:91948537:+,14:91951976:+	SMEK1	core	NM_032560	ENST00000337238,ENST00000554308,ENST00000554390,ENST00000554684,ENST00000554943,ENST00000557018	SMEK1.aAug10,SMEK1.bAug10,SMEK1.iAug10	uc001xzm.2,uc001xzn.2,uc001xzo.2,uc001xzp.1	3.02269	3.25798	3.79564	33.1042	1.41905e-25	4.84784e-23
X:153628282:+,X:153629043:+	RPL10	core	NR_026898	ENST00000458500	RPL10andSNORA70.bAug10,RPL10andSNORA70.vfAug10	uc004fko.2	1.35244	2.72722	3.8508	33.0716	1.4614e-25	4.92851e-23
12:49088219:+,12:49089542:+	CCNT1	core	NM_001240	ENST00000261900,ENST00000417344,ENST00000551989	CCNT1_.aAug10,CCNT1_.hAug10,CCNT1_.sAug10	uc001rse.1,uc009zkz.1	1.35092	2.33431	6.02261	33.0258	1.52321e-25	5.08806e-23
2:198267759:+,2:198268309:+	SF3B1	core	NM_012433	ENST00000335508	SF3B1.aAug10	uc002uue.2	2.02269	2.07478	5.14991	32.8902	1.7223e-25	5.62803e-23
2:198285266:+,2:198285753:+	SF3B1	core	NM_001005526,NM_012433	ENST00000335508,ENST00000409915,ENST00000414174,ENST00000414963,ENST00000487698	SF3B1.aAug10,SF3B1.cAug10,SF3B1.dAug10,SF3B1.eAug10,SF3B1.fAug10,SF3B1.jAug10	uc002uue.2,uc002uuf.2,uc002uug.2,uc010fsk.1	2.02269	2.17905	5.19237	32.8438	1.79659e-25	5.76338e-23
2:198272843:+,2:198273093:+	SF3B1	core	NM_012433	ENST00000335508,ENST00000468925	SF3B1.aAug10,SF3B1.bAug10,SF3B1.lAug10,SF3B1.oAug10	uc002uue.2	2.02269	2.10005	4.98561	32.7532	1.9509e-25	6.18859e-23
14:91957146:+,14:91975850:+	SMEK1	core	NM_032560	ENST00000337238,ENST00000428424,ENST00000554308,ENST00000554390,ENST00000554511,ENST00000554684,ENST00000554943,ENST00000555029,ENST00000555462,ENST00000557018	SMEK1.aAug10,SMEK1.bAug10,SMEK1.dAug10,SMEK1.iAug10	uc001xzm.2,uc001xzn.2,uc001xzo.2,uc001xzp.1,uc010atz.2	3.02269	3.33639	3.5084	32.7523	1.95266e-25	6.18859e-23
21:34939573:+,21:34941277:+	SON	core	NM_138927	ENST00000290239,ENST00000356577,ENST00000381692,ENST00000429093,ENST00000436227,ENST00000455528,ENST00000457208,ENST00000474355	SON.aAug10,SON.bAug10,SON.dAug10,SON.eAug10,SON.kAug10,SON.qAug10	uc002ysd.2,uc002yse.1,uc002ysf.1	2.34302	2.46205	4.07552	32.7197	2.0115e-25	6.3369e-23
2:70515324:+,2:70520750:+	SNRPG	extended	None	ENST00000429728,ENST00000480370	SNRPG.1.gAug10,SNRPG.1.jAug10	None	0.240299	3.07218	3.58979	32.5642	2.319e-25	7.13158e-23
21:34945761:+,21:34947902:+	SON	core	NM_138927	ENST00000290239,ENST00000356577,ENST00000381692,ENST00000436227,ENST00000455528,ENST00000457208,ENST00000465834,ENST00000467616,ENST00000470533,ENST00000473102,ENST00000477419,ENST00000478183,ENST00000484294,ENST00000491794	SON.aAug10,SON.bAug10,SON.dAug10,SON.eAug10,SON.gAug10,SON.hAug10,SON.jAug10,SON.kAug10,SON.lAug10	uc002ysd.2,uc002yse.1,uc002ysf.1,uc002ysh.2	2.34302	2.22735	4.53764	32.4552	2.56303e-25	7.68331e-23
12:69991851:+,12:69993643:+	CCT2	novel	NONE	NONE	NONE	NONE	-1.03564	6.76673	2.99502	32.3415	2.84605e-25	8.38834e-23
15:60656722:+,15:60678227:+	ANXA2	extended	None	ENST00000558985,ENST00000559113,ENST00000559725,ENST00000561445	ANXA2.gAug10,ANXA2.lAug10,ANXA2.oAug10,ANXA2.vpAug10,ANXA2.vrAug10	None	0.412886	3.29821	3.13736	32.3087	2.93336e-25	8.53745e-23
1:68151221:+,1:68151708:+	GADD45A	core	NM_001199742,NM_001924	ENST00000370986,ENST00000460575	GADD45A.aAug10,GADD45A.bAug10,GADD45A.fAug10	uc001ddz.1,uc009wbc.1	2.50289	3.54979	3.94339	32.1152	3.50912e-25	9.79399e-23
18:3252323:+,18:3253231:+	MYL12A	extended	None	ENST00000536605	MYL12A.bAug10,MYL12A.eAug10	uc002kls.2	0.869009	2.82341	3.97029	32.0707	3.65738e-25	1.01159e-22
14:52179269:+,14:52182043:+	FRMD6	core	NM_001042481,NM_152330	ENST00000344768,ENST00000356218,ENST00000395718,ENST00000554167,ENST00000555197,ENST00000557183	FRMD6.aAug10,FRMD6.bAug10,FRMD6.cAug10,FRMD6.dAug10,FRMD6.fAug10	uc001wzb.2,uc001wzc.2,uc001wzd.2,uc001wze.2	2.63454	2.96869	4.06342	32.052	3.72148e-25	1.02469e-22
18:61569116:+,18:61569638:+	SERPINB2	core	NM_001143818,NM_002575	ENST00000299502,ENST00000397996,ENST00000418725,ENST00000457692,ENST00000482254	SERPINB2.aAug10,SERPINB2.bAug10,SERPINB2.cAug10,SERPINB2.dAug10,SERPINB2.eAug10,SERPINB2.fAug10	uc002ljo.2,uc002ljp.1,uc002ljq.1,uc010dqh.2,uc010xeu.1	3.38162	3.24182	3.1339	32.0258	3.81346e-25	1.03952e-22
18:61569802:+,18:61570135:+	SERPINB2	core	NM_001143818,NM_002575	ENST00000299502,ENST00000397996,ENST00000418725,ENST00000457692	SERPINB2.aAug10,SERPINB2.bAug10,SERPINB2.cAug10,SERPINB2.dAug10,SERPINB2.eAug10	uc002ljo.2,uc002ljp.1,uc002ljq.1,uc010dqh.2,uc010xeu.1	3.38162	3.34465	3.12704	31.9686	4.02197e-25	1.09353e-22
14:73538455:+,14:73543027:+	RBM25	core	NM_021239	ENST00000261973,ENST00000525161,ENST00000525321,ENST00000526754,ENST00000527432,ENST00000528081,ENST00000531500,ENST00000532683,ENST00000540173	RBM25.aAug10,RBM25.bAug10,RBM25.cAug10,RBM25.dAug10,RBM25.eAug10,RBM25.fAug10,RBM25.gAug10,RBM25.jAug10	uc001xnn.3,uc001xno.2,uc001xnp.2,uc010ttu.1	2.1353	2.53685	3.85514	31.8917	4.32158e-25	1.13747e-22
12:69214154:+,12:69222551:+	MDM2	extended	None	ENST00000258148,ENST00000258149	MDM2.cAug10	uc009zqx.2	2.96722	7.28432	2.97311	31.8681	4.418e-25	1.15351e-22
14:73554869:+,14:73563623:+	RBM25	core	NM_021239	ENST00000261973,ENST00000525321,ENST00000526754,ENST00000527432,ENST00000531500,ENST00000532683,ENST00000540173	RBM25.aAug10,RBM25.bAug10,RBM25.dAug10,RBM25.eAug10,RBM25.fAug10,RBM25.gAug10	uc001xnn.3,uc001xno.2,uc010ttu.1	2.1353	2.29641	4.16336	31.8177	4.63123e-25	1.19437e-22
14:91931763:+,14:91937181:+	SMEK1	core	NM_032560	ENST00000337238,ENST00000428424,ENST00000554390,ENST00000554684,ENST00000554943,ENST00000555462	SMEK1.aAug10,SMEK1.bAug10,SMEK1.cAug10,SMEK1.dAug10	uc001xzm.2,uc001xzn.2,uc001xzo.2,uc010atz.2	3.02269	3.12588	3.38428	31.7807	4.79504e-25	1.22759e-22
11:93471665:+,11:93472403:+	TAF1D	core	NM_024116	ENST00000323981,ENST00000448108,ENST00000526015,ENST00000527169	TAF1_.aAug10,TAF1_.bAug10,TAF1_.cAug10,TAF1_.dAug10,TAF1_.eAug10,TAF1_.hAug10,TAF1_.qAug10	uc001pdz.2,uc001pea.1,uc001ped.2	1.99884	2.47463	4.21408	31.6684	5.32845e-25	1.32859e-22
7:139090533:+,7:139091920:+	LUC7L2	core	NM_001244584,NM_001244585,NM_016019	ENST00000263545,ENST00000354926,ENST00000456182,ENST00000463912,ENST00000498518,ENST00000541170,ENST00000541515,ENST00000545899	C7orf55andLUC7L2.aAug10,C7orf55andLUC7L2.bAug10,C7orf55andLUC7L2.cAug10,C7orf55andLUC7L2.dAug10,C7orf55andLUC7L2.eAug10,C7orf55andLUC7L2.fAug10,C7orf55andLUC7L2.gAug10	uc003vux.2,uc003vuy.2,uc003vuz.1,uc003vva.2,uc011kqs.1,uc011kqt.1	2.09533	2.05844	4.6513	31.5577	5.91433e-25	1.45453e-22
8:12948941:+,8:12950121:+	DLC1	core	NM_001164271,NM_006094,NM_182643	ENST00000276297,ENST00000358919,ENST00000510318,ENST00000512044,ENST00000520226	DLC1.aAug10,DLC1.bAug10,DLC1.cAug10,DLC1.dAug10,DLC1.fAug10	uc003wwk.1,uc003wwl.1,uc003wwm.2,uc011kxx.1	2.66829	2.6865	3.76344	31.5573	5.91649e-25	1.45453e-22
8:12946213:+,8:12947761:+	DLC1	core	NM_001164271,NM_006094,NM_182643	ENST00000276297,ENST00000358919,ENST00000510318,ENST00000512044,ENST00000520226	DLC1.aAug10,DLC1.bAug10,DLC1.cAug10,DLC1.dAug10,DLC1.fAug10	uc003wwk.1,uc003wwl.1,uc003wwm.2,uc011kxx.1	2.66829	2.70374	3.83211	31.5177	6.14228e-25	1.50297e-22
10:112054045:+,10:112054986:+	SMNDC1	core	NM_005871	ENST00000369592,ENST00000369603	SMNDC1.aAug10,SMNDC1.bAug10,SMNDC1.cAug10,SMNDC1.hAug10	uc001kzb.2,uc001kzc.3	2.42858	2.23297	4.26837	31.5153	6.15638e-25	1.50297e-22
6:136593217:+,6:136594220:+	BCLAF1	core	NM_001077440,NM_001077441,NM_014739	ENST00000353331,ENST00000392348,ENST00000476194,ENST00000527536,ENST00000527613,ENST00000527759,ENST00000530429,ENST00000530767,ENST00000531224,ENST00000532076,ENST00000532384,ENST00000534269,ENST00000534792	BCLAF1.aAug10,BCLAF1.bAug10,BCLAF1.cAug10,BCLAF1.dAug10,BCLAF1.eAug10,BCLAF1.fAug10,BCLAF1.hAug10,BCLAF1.qAug10,BCLAF1.vbAug10	uc003qgw.1,uc003qgx.1,uc003qgy.1,uc011edc.1,uc011edd.1,uc011ede.1	1.80655	2.02658	4.57249	31.5098	6.18813e-25	1.50375e-22
11:10827594:+,11:10828802:+	EIF4G2	extended	None	ENST00000530702	ZBED5andEIF4G2andSNORD97.vaAug10,ZBED5andEIF4G2andSNORD97.vxAug10	None	0.723445	6.27789	2.37772	31.4881	6.31639e-25	1.52086e-22
12:69218431:+,12:69229609:+	MDM2	extended	None	ENST00000481186,ENST00000536089,ENST00000540352	MDM2.fAug10	uc009zrd.2	2.96722	5.48468	2.59473	31.4418	6.59959e-25	1.57822e-22
10:112057486:+,10:112058406:+	SMNDC1	core	NM_005871	ENST00000369592,ENST00000369603,ENST00000471297	SMNDC1.aAug10,SMNDC1.bAug10,SMNDC1.cAug10,SMNDC1.eAug10,SMNDC1.jAug10	uc001kzb.2,uc001kzc.3	2.42858	2.50667	3.7799	31.4238	6.71345e-25	1.59457e-22
20:30310151:+,20:30310421:+	BCL2L1	core	NM_001191,NM_138578	ENST00000307677,ENST00000376055	BCL2L1.bAug10,BCL2L1.gAug10	uc002wwl.2,uc002wwm.2	2.86013	3.40626	3.37998	31.3604	7.12918e-25	1.6596e-22
2:238261227:+,2:238261984:+	COL6A3	core	NM_004369,NM_057166,NM_057167	ENST00000295550,ENST00000346358,ENST00000347401,ENST00000353578,ENST00000409809,ENST00000472056,ENST00000491769	COL6A3.aAug10,COL6A3.bAug10,COL6A3.cAug10,COL6A3.gAug10	uc002vwl.2,uc002vwo.2,uc002vwp.1,uc010znj.1	2.01483	2.01709	5.55297	31.322	7.39466e-25	1.7063e-22
7:108210547:+,7:108212161:+	DNAJB9	core	NM_012328	ENST00000249356,ENST00000491582	DNAJB9.aAug10,DNAJB9.dAug10,DNAJB9.eAug10	uc003vfn.2	3.26131	3.2723	3.16991	31.2739	7.74041e-25	1.77105e-22
21:35896008:+,21:35898961:+	RCAN1	core	NM_203418	ENST00000381132,ENST00000492600	RCAN1.cAug10,RCAN1.dAug10	uc002yub.2,uc011adx.1	1.39805	2.24019	4.39472	31.2484	7.93117e-25	1.80243e-22
2:198268488:+,2:198269800:+	SF3B1	core	NM_012433	ENST00000335508	SF3B1.aAug10	uc002uue.2	2.02269	2.0444	4.79312	31.2287	8.08167e-25	1.81701e-22
12:49108307:+,12:49110298:+	CCNT1	core	NM_001240	ENST00000261900,ENST00000417344	CCNT1_.aAug10,CCNT1_.hAug10	uc001rse.1,uc009zkz.1	1.35092	2.07752	5.54261	31.2074	8.24727e-25	1.84635e-22
20:30253889:+,20:30309458:+	BCL2L1	core	NM_138578	ENST00000307677,ENST00000376062,ENST00000420653,ENST00000450273	BCL2L1.aAug10,BCL2L1.bAug10,BCL2L1.cAug10,BCL2L1.dAug10	uc002wwl.2,uc002wwn.2	2.86013	2.47946	4.45268	31.1954	8.34254e-25	1.85977e-22
2:105984196:+,2:105990016:+	FHL2	core	NM_001039492,NM_001450,NM_201555,NM_201557	ENST00000322142,ENST00000344213,ENST00000358129,ENST00000393352,ENST00000393353,ENST00000408995,ENST00000409177,ENST00000409807,ENST00000452732,ENST00000530340	FHL2.aAug10,FHL2.bAug10,FHL2.cAug10,FHL2.dAug10,FHL2.eAug10,FHL2.fAug10,FHL2.gAug10,FHL2.hAug10,FHL2.iAug10,FHL2.nAug10,FHL2.rAug10	uc002tcu.2,uc002tcv.2,uc002tcw.2,uc002tcx.2,uc002tcy.2,uc002tcz.2,uc002tdb.2,uc002tdd.2	2.92614	2.83384	3.49715	31.0849	9.27213e-25	2.01992e-22
2:198270196:+,2:198272722:+	SF3B1	core	NM_012433	ENST00000335508	SF3B1.aAug10,SF3B1.bAug10,SF3B1.oAug10	uc002uue.2	2.02269	2.01227	4.82322	31.0504	9.58341e-25	2.07912e-22
21:34932081:+,21:34939463:+	SON	core	NM_138927	ENST00000290239,ENST00000356577,ENST00000381692,ENST00000421541,ENST00000436227,ENST00000455528	SON.aAug10,SON.bAug10,SON.dAug10,SON.eAug10,SON.fAug10	uc002ysd.2,uc002yse.1,uc002ysf.1,uc002ysg.2	2.34302	2.38764	4.22005	30.965	1.04019e-24	2.23823e-22
12:12966388:+,12:12967065:+	DDX47	core	NM_016355,NM_201224	ENST00000352940,ENST00000358007,ENST00000534843,ENST00000540583,ENST00000541537,ENST00000542123,ENST00000544032,ENST00000544400,ENST00000544497,ENST00000545038	APOLD1andDDX47.aAug10,APOLD1andDDX47.bAug10,APOLD1andDDX47.cAug10,APOLD1andDDX47.eAug10,APOLD1andDDX47.fAug10,APOLD1andDDX47.hAug10,APOLD1andDDX47.iAug10,APOLD1andDDX47.mAug10,APOLD1andDDX47.oAug10	uc001rav.2,uc001rax.2,uc001ray.2,uc009zhw.1,uc010shn.1	1.69437	2.08579	4.68472	30.9214	1.0848e-24	2.30129e-22
14:73550259:+,14:73554709:+	RBM25	core	NM_021239	ENST00000261973,ENST00000525321,ENST00000526754,ENST00000527432,ENST00000531500,ENST00000532683,ENST00000540173	RBM25.aAug10,RBM25.bAug10,RBM25.dAug10,RBM25.eAug10,RBM25.fAug10,RBM25.gAug10	uc001xnn.3,uc001xno.2,uc010ttu.1	2.1353	2.41498	4.01787	30.8521	1.15971e-24	2.44541e-22
11:33744009:+,11:33757928:+	CD59	core	NM_000611	ENST00000395850,ENST00000533403	CD59.jAug10,CD59.kAug10,CD59.pAug10	uc001muv.3,uc001mux.3	1.64724	2.06642	4.83646	30.8139	1.20321e-24	2.52197e-22
12:49089612:+,12:49091921:+	CCNT1	extended	None	ENST00000417344	CCNT1_.hAug10	uc009zkz.1	1.35092	2.67268	4.40313	30.7666	1.25946e-24	2.61743e-22
2:198285857:+,2:198288532:+	SF3B1	core	NM_001005526,NM_012433	ENST00000335508,ENST00000409915,ENST00000414963,ENST00000487698	SF3B1.aAug10,SF3B1.cAug10,SF3B1.dAug10,SF3B1.eAug10,SF3B1.fAug10	uc002uue.2,uc002uuf.2,uc002uug.2,uc010fsk.1	2.02269	2.17992	5.25025	30.7084	1.33245e-24	2.72138e-22
1:23650225:+,1:23664247:+	HNRNPR	extended	None	ENST00000427764,ENST00000463552	HNRNPR.bAug10,HNRNPR.cAug10,HNRNPR.jAug10	uc009vql.2,uc010odw.1	0.893702	3.93071	2.63758	30.7073	1.33385e-24	2.72138e-22
16:56966303:+,16:56969147:+	HERPUD1	core	NM_001010989,NM_001010990,NM_014685	ENST00000300302,ENST00000344114,ENST00000379792,ENST00000439977	HERPUD1.aAug10,HERPUD1.bAug10,HERPUD1.cAug10,HERPUD1.eAug10,HERPUD1.fAug10,HERPUD1.gAug10,HERPUD1.jAug10,HERPUD1.kAug10,HERPUD1.oAug10,HERPUD1.qAug10	uc002eke.1,uc002ekf.1,uc002ekg.1,uc010cco.1,uc010ccp.1,uc010vhj.1	2.18223	2.33356	4.14568	30.7039	1.33833e-24	2.72381e-22
1:24972564:+,1:24973158:+	SRRM1	core	NM_005839	ENST00000323848,ENST00000374389,ENST00000447431,ENST00000462710,ENST00000466910,ENST00000467454,ENST00000468822,ENST00000478890,ENST00000479034,ENST00000490543	SRRM1.aAug10,SRRM1.bAug10,SRRM1.cAug10,SRRM1.eAug10,SRRM1.fAug10,SRRM1.iAug10,SRRM1.rAug10,SRRM1.sAug10,SRRM1.tAug10,SRRM1.uAug10,SRRM1.vdAug10,SRRM1.veAug10	uc001bjm.2,uc009vrh.1,uc010oel.1	2.73355	2.7775	3.50075	30.604	1.47456e-24	2.9723e-22
6:132271683:+,6:132271910:+	CTGF	core	NM_001901	ENST00000367976	CTGF.aAug10,CTGF.bAug10,CTGF.cAug10	uc003qcz.2	2.01013	2.08148	6.08727	30.3939	1.80976e-24	3.53293e-22
14:73577863:+,14:73578236:+	RBM25	core	NM_021239	ENST00000261973,ENST00000527432,ENST00000528081	RBM25.aAug10,RBM25.bAug10,RBM25.cAug10	uc001xno.2,uc001xnp.2,uc010ttu.1	2.1353	2.08984	4.33567	30.3556	1.87883e-24	3.66098e-22
12:59282744:+,12:59283778:+	LRIG3	core	NM_001136051,NM_153377	ENST00000320743,ENST00000379141,ENST00000433272,ENST00000552267	LRIG3.aAug10,LRIG3.bAug10,LRIG3.cAug10,LRIG3.eAug10	uc001sqr.2,uc009zqh.2,uc010ssh.1	2.08927	2.5506	3.61188	30.3532	1.88332e-24	3.66293e-22
10:124248517:+,10:124248938:+	HTRA1	core	NM_002775	ENST00000368984,ENST00000435263	HTRA1.aAug10,HTRA1.bAug10,HTRA1.cAug10	uc001lgj.2	1.95834	2.01063	4.73594	30.3425	1.9032e-24	3.68797e-22
20:37049745:+,20:37055062:+	LOC388796	extended	None	ENST00000423536,ENST00000449469	SNORA71AandSNORA71B.eAug10,SNORA71AandSNORA71B.hAug10,SNORA71AandSNORA71B.nAug10,SNORA71AandSNORA71B.uAug10,SNORA71AandSNORA71B.vaAug10,SNORA71AandSNORA71B.vbAug10	uc002xie.3,uc002xij.3	2.27759	2.85612	3.44693	30.3027	1.97892e-24	3.79904e-22
21:34915475:+,21:34918519:+	SON	core	NM_032195,NM_138927	ENST00000290239,ENST00000300278,ENST00000356577,ENST00000381679,ENST00000381692,ENST00000455528,ENST00000475072,ENST00000492229	SON.aAug10,SON.bAug10,SON.cAug10,SON.dAug10,SON.eAug10,SON.iAug10,SON.oAug10	uc002ysb.1,uc002ysc.2,uc002ysd.2,uc002yse.1,uc002ysf.1	2.34302	2.56282	3.95864	30.2972	1.98946e-24	3.80605e-22
2:198269901:+,2:198269999:+	SF3B1	core	NM_012433	ENST00000335508	SF3B1.aAug10,SF3B1.bAug10,SF3B1.oAug10	uc002uue.2	2.02269	2.15915	5.13619	30.29	2.0036e-24	3.82614e-22
14:73543076:+,14:73544077:+	RBM25	core	NM_021239	ENST00000261973,ENST00000525161,ENST00000525321,ENST00000526754,ENST00000527432,ENST00000528081,ENST00000531500,ENST00000532683,ENST00000540173	RBM25.aAug10,RBM25.bAug10,RBM25.cAug10,RBM25.dAug10,RBM25.eAug10,RBM25.fAug10,RBM25.gAug10,RBM25.jAug10	uc001xnn.3,uc001xno.2,uc001xnp.2,uc010ttu.1	2.1353	2.52	3.94529	30.2072	2.17338e-24	4.0874e-22
18:61564453:+,18:61564961:+	SERPINB2	core	NM_001143818,NM_002575	ENST00000299502,ENST00000397996,ENST00000413956,ENST00000418725,ENST00000457692,ENST00000482254	SERPINB2.aAug10,SERPINB2.bAug10,SERPINB2.cAug10,SERPINB2.dAug10,SERPINB2.eAug10	uc002ljo.2,uc002ljp.1,uc002ljq.1,uc010dqh.2,uc010xeu.1	3.38162	3.31091	2.97219	30.1463	2.30774e-24	4.25655e-22
8:12943440:+,8:12943799:+	DLC1	core	NM_001164271,NM_006094,NM_182643	ENST00000276297,ENST00000358919,ENST00000510318,ENST00000512044,ENST00000520226	DLC1.aAug10,DLC1.bAug10,DLC1.cAug10,DLC1.dAug10,DLC1.fAug10,DLC1.nAug10	uc003wwk.1,uc003wwl.1,uc003wwm.2,uc011kxx.1	2.66829	2.54942	4.1331	30.1454	2.30989e-24	4.25655e-22
12:69203072:+,12:69210592:+	MDM2	extended	None	ENST00000350057	MDM2.bAug10	None	2.96722	8.48877	2.78316	30.1179	2.37342e-24	4.35836e-22
12:53856351:+,12:53861005:+	PCBP2	extended	None	ENST00000379777,ENST00000547987,ENST00000549863	PRR13andPCBP2.mAug10,PRR13andPCBP2.oAug10	uc001sdj.3,uc010soj.1	-0.100747	2.79249	3.33713	30.1159	2.378e-24	4.35916e-22
21:34947973:+,21:34948084:+	SON	core	NM_138927	ENST00000290239,ENST00000356577,ENST00000381692,ENST00000436227,ENST00000455528,ENST00000457208,ENST00000465834,ENST00000467616,ENST00000470533,ENST00000473102,ENST00000477419,ENST00000478183,ENST00000484294,ENST00000491794	SON.aAug10,SON.bAug10,SON.dAug10,SON.eAug10,SON.gAug10,SON.hAug10,SON.jAug10,SON.kAug10,SON.lAug10	uc002ysd.2,uc002yse.1,uc002ysf.1,uc002ysh.2	2.34302	2.18866	4.04463	30.0804	2.46286e-24	4.47572e-22
7:45023645:+,7:45023956:+	C7orf40	core	NR_003697	None	C7orf40andSNORA9.eAug10,C7orf40andSNORA9.fAug10,C7orf40andSNORA9.hAug10	uc003tml.3	1.44389	2.59791	3.68196	30.0667	2.49649e-24	4.52123e-22
12:69991546:+,12:69993643:+	CCT2	novel	NONE	NONE	NONE	NONE	-1.03564	7.7505	2.39882	30.0162	2.62428e-24	4.72825e-22
2:198274731:+,2:198281465:+	SF3B1	core	NM_012433	ENST00000335508,ENST00000470268	SF3B1.aAug10,SF3B1.bAug10	uc002uue.2	2.02269	2.12317	4.75258	30.0113	2.63708e-24	4.74319e-22
6:136597646:+,6:136599003:+	BCLAF1	core	NM_001077440,NM_014739	ENST00000353331,ENST00000392348,ENST00000527536,ENST00000527613,ENST00000527759,ENST00000529826,ENST00000530429,ENST00000531224,ENST00000532384,ENST00000533621	BCLAF1.aAug10,BCLAF1.bAug10,BCLAF1.cAug10,BCLAF1.dAug10,BCLAF1.gAug10,BCLAF1.uAug10,BCLAF1.veAug10	uc003qgx.1,uc003qgy.1,uc011edd.1,uc011ede.1	1.80655	2.13187	4.62072	29.9707	2.74519e-24	4.89579e-22
21:34927697:+,21:34929462:+	SON	core	NM_032195,NM_138927	ENST00000290239,ENST00000300278,ENST00000356577,ENST00000381679,ENST00000421541,ENST00000436227,ENST00000455528	SON.aAug10,SON.bAug10,SON.cAug10,SON.dAug10,SON.fAug10,SON.nAug10	uc002ysb.1,uc002ysc.2,uc002ysd.2,uc002yse.1,uc002ysg.2	2.34302	2.18653	4.21046	29.9642	2.76277e-24	4.9105e-22
15:33010362:+,15:33022891:+	GREM1	core	NM_001191322,NM_001191323,NM_013372	ENST00000300177,ENST00000560677,ENST00000560830	GREM1.aAug10,GREM1.bAug10,GREM1.cAug10,GREM1.dAug10	uc001zhd.1,uc001zhe.1,uc010uby.1	2.27133	2.27075	3.93278	29.8635	3.05335e-24	5.32798e-22
5:126883613:+,5:126887399:+	PRRC1	core	NM_130809	ENST00000296666,ENST00000330542,ENST00000512535,ENST00000512635,ENST00000513427	PRRC1.aAug10,PRRC1.bAug10	uc003kuk.2	1.59029	2.37214	3.72482	29.8553	3.07837e-24	5.35388e-22
11:62622023:+,11:62622605:+	SNHG1	extended	None	ENST00000537068,ENST00000538266,ENST00000541615,ENST00000542112,ENST00000545440	SNHG1_.bAug10,SNHG1_.oAug10,SNHG1_.vcAug10,SNHG1_.vdAug10,SNHG1_.veAug10,SNHG1_.voAug10,SNHG1_.vtAug10	None	-0.152273	3.31832	2.82804	29.8234	3.17757e-24	5.46173e-22
10:112058548:+,10:112063226:+	SMNDC1	core	NM_005871	ENST00000369592,ENST00000369603,ENST00000460483,ENST00000477763	SMNDC1.aAug10,SMNDC1.bAug10,SMNDC1.gAug10,SMNDC1.iAug10,SMNDC1.jAug10	uc001kzc.3	2.42858	2.59613	3.54594	29.8071	3.22979e-24	5.49906e-22
14:73525413:+,14:73538335:+	RBM25	core	NM_021239	ENST00000261973,ENST00000525321,ENST00000526754,ENST00000532683,ENST00000540173	RBM25.bAug10,RBM25.dAug10,RBM25.eAug10	uc001xnn.3,uc001xno.2	2.1353	2.47894	3.5951	29.6093	3.93545e-24	6.53141e-22
1:226334522:+,1:226340036:+	ACBD3	core	NM_022735	ENST00000366812	ACBD3.aAug10	uc001hpy.2	2.47828	2.61609	3.84465	29.607	3.94454e-24	6.53591e-22
1:207959027:+,1:207966864:+	CD46	core	NM_153826,NM_172353,NM_172359,NM_172361	ENST00000322875,ENST00000354848,ENST00000357714,ENST00000360212,ENST00000361067,ENST00000367047,ENST00000462968,ENST00000469535,ENST00000480003	CD46.aAug10,CD46.cAug10,CD46.eAug10,CD46.gAug10,CD46.nAug10,CD46.oAug10	uc001hgd.2,uc001hge.2,uc001hgh.2,uc001hgj.2,uc001hgm.2,uc001hgo.2,uc001hgp.2	1.5846	2.58185	3.46359	29.5524	4.16662e-24	6.83957e-22
1:225971070:+,1:225976961:+	SRP9	extended	None	None	SRP9andEPHX1.mAug10	uc001hpi.3	0.0817696	4.20227	2.42534	29.5273	4.27326e-24	6.9607e-22
2:105990190:+,2:106002818:+	FHL2	core	NM_001039492,NM_001450,NM_201555,NM_201557	ENST00000322142,ENST00000344213,ENST00000358129,ENST00000393352,ENST00000393353,ENST00000408995,ENST00000409177,ENST00000409807,ENST00000530340	FHL2.aAug10,FHL2.bAug10,FHL2.cAug10,FHL2.dAug10,FHL2.eAug10,FHL2.fAug10,FHL2.gAug10,FHL2.hAug10,FHL2.iAug10	uc002tcu.2,uc002tcv.2,uc002tcw.2,uc002tcx.2,uc002tcy.2,uc002tcz.2,uc002tdb.2,uc002tdd.2,uc002tde.1	2.92614	3.06072	3.41358	29.5172	4.31651e-24	6.99114e-22
11:128332471:+,11:128333404:+	ETS1	core	NM_001143820,NM_001162422,NM_005238	ENST00000319397,ENST00000345075,ENST00000392668,ENST00000526145,ENST00000530924,ENST00000535549	ETS1.aAug10,ETS1.bAug10,ETS1.cAug10,ETS1.fAug10,ETS1.gAug10,ETS1.kAug10	uc001qej.2,uc009zch.2,uc010sbs.1	2.39711	2.47859	3.80015	29.4924	4.42556e-24	7.10935e-22
7:43635712:+,7:43647855:+	STK17A	core	NM_004760	ENST00000319357,ENST00000462448	STK17A.aAug10	uc003tih.2	2.24179	2.19172	3.97531	29.4047	4.83466e-24	7.62439e-22
8:12952754:+,8:12955908:+	DLC1	core	NM_001164271,NM_006094,NM_182643	ENST00000276297,ENST00000358919,ENST00000510250,ENST00000512044,ENST00000520226	DLC1.aAug10,DLC1.bAug10,DLC1.cAug10,DLC1.dAug10	uc003wwk.1,uc003wwl.1,uc003wwm.2,uc011kxx.1	2.66829	2.70436	3.88822	29.3898	4.90792e-24	7.69621e-22
7:10977774:+,7:10979643:+	NDUFA4	extended	None	None	NDUFA4.gAug10	None	0.842039	6.9341	2.33964	29.3196	5.26862e-24	8.10482e-22
12:59283921:+,12:59284447:+	LRIG3	core	NM_001136051,NM_153377	ENST00000320743,ENST00000379141,ENST00000433272,ENST00000552267	LRIG3.aAug10,LRIG3.bAug10,LRIG3.cAug10,LRIG3.eAug10	uc001sqr.2,uc009zqh.2,uc010ssh.1	2.08927	2.55115	3.43328	29.238	5.72261e-24	8.63173e-22
1:24969838:+,1:24972475:+	SRRM1	core	NM_005839	ENST00000323848,ENST00000374389,ENST00000447431,ENST00000462710,ENST00000466910,ENST00000467454,ENST00000468822,ENST00000479034,ENST00000490543	SRRM1.aAug10,SRRM1.bAug10,SRRM1.iAug10,SRRM1.rAug10,SRRM1.sAug10,SRRM1.tAug10,SRRM1.uAug10,SRRM1.vdAug10	uc001bjm.2,uc010oel.1	2.73355	2.76385	3.25896	29.2152	5.85663e-24	8.77239e-22
12:59307837:+,12:59308046:+	LRIG3	core	NM_001136051,NM_153377	ENST00000320743,ENST00000379141,ENST00000433272,ENST00000548968,ENST00000552267	LRIG3.aAug10,LRIG3.bAug10,LRIG3.cAug10,LRIG3.eAug10,LRIG3.hAug10	uc001sqr.2,uc009zqh.2,uc010ssh.1	2.08927	2.57691	3.54761	29.2134	5.86713e-24	8.77239e-22
11:128360471:+,11:128391808:+	ETS1	core	NM_005238	ENST00000319397,ENST00000345075,ENST00000526145,ENST00000531611	ETS1.bAug10,ETS1.dAug10	uc009zcg.2,uc010sbs.1	2.39711	2.57282	3.70068	29.2115	5.87854e-24	8.7737e-22
18:61565078:+,18:61568974:+	SERPINB2	core	NM_001143818,NM_002575	ENST00000299502,ENST00000397996,ENST00000418725,ENST00000457692,ENST00000482254	SERPINB2.aAug10,SERPINB2.bAug10,SERPINB2.cAug10,SERPINB2.dAug10,SERPINB2.eAug10,SERPINB2.fAug10	uc002ljo.2,uc002ljp.1,uc002ljq.1,uc010dqh.2,uc010xeu.1	3.38162	3.30882	2.88709	29.193	5.99001e-24	8.90218e-22
21:34929622:+,21:34931536:+	SON	core	NM_032195,NM_138927	ENST00000290239,ENST00000300278,ENST00000356577,ENST00000381692,ENST00000421541,ENST00000436227,ENST00000455528	SON.aAug10,SON.bAug10,SON.cAug10,SON.dAug10,SON.eAug10,SON.fAug10	uc002ysc.2,uc002ysd.2,uc002yse.1,uc002ysf.1,uc002ysg.2	2.34302	2.16769	4.27251	29.1837	6.04659e-24	8.96095e-22
8:12947979:+,8:12948827:+	DLC1	core	NM_001164271,NM_006094,NM_182643	ENST00000276297,ENST00000358919,ENST00000510318,ENST00000512044,ENST00000520226	DLC1.aAug10,DLC1.bAug10,DLC1.cAug10,DLC1.dAug10,DLC1.fAug10	uc003wwk.1,uc003wwl.1,uc003wwm.2,uc011kxx.1	2.66829	2.67261	3.90092	29.1421	6.3083e-24	9.21897e-22
18:61558846:+,18:61562498:+	SERPINB2	core	NM_001143818,NM_002575	ENST00000299502,ENST00000404622,ENST00000413956,ENST00000443281,ENST00000457692	SERPINB2.bAug10,SERPINB2.cAug10,SERPINB2.gAug10,SERPINB2.hAug10	uc002ljo.2,uc010xeu.1	3.38162	3.43103	2.79904	29.118	6.46489e-24	9.38266e-22
20:37055146:+,20:37059684:+	LOC388796	core	NR_015366,NR_027241	ENST00000413755,ENST00000417578,ENST00000423536,ENST00000436764,ENST00000456953	SNORA71AandSNORA71B.gAug10,SNORA71AandSNORA71B.iAug10,SNORA71AandSNORA71B.jAug10,SNORA71AandSNORA71B.kAug10,SNORA71AandSNORA71B.lAug10,SNORA71AandSNORA71B.mAug10,SNORA71AandSNORA71B.nAug10,SNORA71AandSNORA71B.rAug10,SNORA71AandSNORA71B.sAug10,SNORA71AandSNORA71B.tAug10,SNORA71AandSNORA71B.uAug10,SNORA71AandSNORA71B.vcAug10,SNORA71AandSNORA71B.veAug10,SNORA71AandSNORA71B.vfAug10,SNORA71AandSNORA71…	uc002xif.3,uc002xii.3,uc002xij.3	2.27759	2.44895	3.60036	29.0858	6.68055e-24	9.64244e-22
13:79933821:+,13:79939713:+	RBM26	core	NM_022118	ENST00000267229,ENST00000327303,ENST00000438724,ENST00000438737,ENST00000484573	RBM26.aAug10,RBM26.bAug10,RBM26.cAug10,RBM26.dAug10,RBM26.eAug10,RBM26.fAug10,RBM26.iAug10	uc001vkx.2,uc001vky.2,uc001vkz.2,uc001vla.2	2.32617	2.33918	3.65749	29.0354	7.03274e-24	1.0027e-21
17:48267741:+,17:48268178:+	COL1A1	novel	NONE	NONE	NONE	NONE	1.20806	5.96877	2.19685	28.984	7.41185e-24	1.04402e-21
20:57611815:+,20:57613521:+	SLMO2	core	NM_001256403	ENST00000371033	SLMO2andATP5E.cAug10	uc010zzv.1	1.79205	5.06172	2.22103	28.9652	7.55577e-24	1.05721e-21
X:23801534:+,X:23801775:+	SAT1	core	NM_002970,NR_027783	ENST00000342463,ENST00000379251,ENST00000379253,ENST00000379254,ENST00000379270,ENST00000463236,ENST00000489394	SAT1.aAug10,SAT1.bAug10,SAT1.eAug10,SAT1.fAug10,SAT1.gAug10,SAT1.jAug10,SAT1.lAug10,SAT1.nAug10	uc004dau.2,uc004dav.2,uc010nfv.2	3.21701	3.49875	2.59184	28.9425	7.73314e-24	1.07916e-21
14:52167853:+,14:52169230:+	FRMD6	core	NM_001042481,NM_152330	ENST00000356218,ENST00000395718,ENST00000554167	FRMD6.bAug10,FRMD6.cAug10,FRMD6.dAug10,FRMD6.hAug10,FRMD6.lAug10	uc001wzb.2,uc001wzc.2,uc001wze.2	2.63454	2.63174	3.91419	28.8377	8.61079e-24	1.18747e-21
20:48256337:+,20:48257015:+	B4GALT5	core	NM_004776	ENST00000371711	B4GALT5.aAug10	uc002xuu.3	2.18271	2.29331	3.72585	28.8136	8.82724e-24	1.21413e-21
1:226347059:+,1:226349232:+	ACBD3	core	NM_022735	ENST00000366812	ACBD3.aAug10	uc001hpy.2	2.47828	2.34535	3.98681	28.7968	8.9805e-24	1.22879e-21
19:34699956:+,19:34706501:+	LSM14A	extended	None	None	LSM14A.dAug10	None	0.205566	3.41472	2.68073	28.7532	9.39307e-24	1.27694e-21
5:95236484:+,5:95236660:+	ELL2	core	NM_012081	ENST00000237853,ENST00000505584,ENST00000513343	ELL2.aAug10,ELL2.dAug10,ELL2.eAug10,ELL2.jAug10	uc003klr.3	1.76837	2.80706	3.4011	28.7482	9.44168e-24	1.28024e-21
6:136590750:+,6:136593133:+	BCLAF1	core	NM_001077440,NM_001077441,NM_014739	ENST00000353331,ENST00000392348,ENST00000527536,ENST00000527613,ENST00000527759,ENST00000529826,ENST00000530429,ENST00000530767,ENST00000531224,ENST00000532384,ENST00000534269,ENST00000534792	BCLAF1.aAug10,BCLAF1.bAug10,BCLAF1.cAug10,BCLAF1.dAug10,BCLAF1.eAug10,BCLAF1.fAug10,BCLAF1.hAug10	uc003qgw.1,uc003qgx.1,uc003qgy.1,uc011edc.1,uc011edd.1,uc011ede.1	1.80655	2.01325	4.25442	28.7315	9.60543e-24	1.29678e-21
1:154940507:+,1:154940971:+	SHC1	extended	None	ENST00000412170,ENST00000414115	SHC1andPYGO2andPBXIP1.cAug10,SHC1andPYGO2andPBXIP1.vaAug10,SHC1andPYGO2andPBXIP1.vjAug10	None	0.540256	3.17692	2.84383	28.7082	9.83912e-24	1.3222e-21
2:192265194:+,2:192272841:+	MYO1B	core	NM_012223	ENST00000339514	MYO1B.cAug10	uc002usq.2	0.587769	2.63079	3.30346	28.6914	1.00109e-23	1.34015e-21
1:24996806:+,1:24997877:+	SRRM1	core	NM_005839	ENST00000323848,ENST00000374389,ENST00000447431,ENST00000474843,ENST00000479034,ENST00000489130	SRRM1.aAug10,SRRM1.bAug10,SRRM1.dAug10,SRRM1.qAug10	uc001bjm.2,uc009vri.1,uc010oel.1	2.73355	2.41884	3.69935	28.6802	1.01271e-23	1.35226e-21
5:95234514:+,5:95236397:+	ELL2	core	NM_012081	ENST00000237853,ENST00000513343	ELL2.aAug10,ELL2.eAug10	uc003klr.3	1.76837	2.73601	3.15878	28.6775	1.01562e-23	1.35272e-21
1:24976577:+,1:24977900:+	SRRM1	core	NM_005839	ENST00000323848,ENST00000374389,ENST00000447431,ENST00000467454,ENST00000479034	SRRM1.aAug10,SRRM1.bAug10,SRRM1.cAug10,SRRM1.dAug10,SRRM1.fAug10,SRRM1.kAug10,SRRM1.uAug10	uc001bjm.2,uc009vrh.1,uc009vri.1,uc010oel.1	2.73355	2.97792	2.97989	28.6524	1.04222e-23	1.37596e-21
13:96375620:+,13:96377432:+	DNAJC3	core	NM_006260	ENST00000376795	DNAJC3.aAug10,DNAJC3.bAug10,DNAJC3.cAug10,DNAJC3.gAug10	uc001vmp.2,uc001vmq.2,uc001vmr.2	2.54568	2.74439	3.25811	28.6467	1.0484e-23	1.38238e-21
8:12943972:+,8:12945996:+	DLC1	core	NM_001164271,NM_006094,NM_182643	ENST00000276297,ENST00000358919,ENST00000510318,ENST00000512044,ENST00000520226,ENST00000521730	DLC1.aAug10,DLC1.bAug10,DLC1.cAug10,DLC1.dAug10,DLC1.fAug10,DLC1.jAug10	uc003wwk.1,uc003wwl.1,uc003wwm.2,uc011kxx.1	2.66829	2.61527	3.73997	28.5933	1.10795e-23	1.45362e-21
5:126869478:+,5:126874732:+	PRRC1	core	NM_130809	ENST00000296666,ENST00000330542,ENST00000442138,ENST00000512535,ENST00000512635	PRRC1.aAug10,PRRC1.bAug10,PRRC1.cAug10	uc003kuj.3,uc003kuk.2	1.59029	2.22969	3.95264	28.536	1.17574e-23	1.51423e-21
12:59284578:+,12:59307763:+	LRIG3	core	NM_001136051,NM_153377	ENST00000320743,ENST00000379141,ENST00000433272,ENST00000552267	LRIG3.aAug10,LRIG3.bAug10,LRIG3.cAug10,LRIG3.eAug10	uc001sqr.2,uc009zqh.2,uc010ssh.1	2.08927	2.54922	3.70557	28.4723	1.25618e-23	1.60279e-21
1:78383958:+,1:78392099:+	NEXN	extended	None	ENST00000440324,ENST00000457030	NEXN.aAug10,NEXN.eAug10	uc001dia.3,uc001did.1,uc009wcb.1	0.401713	3.65807	2.55109	28.4719	1.25669e-23	1.60279e-21
1:16459863:+,1:16459976:+	EPHA2	core	NM_004431	ENST00000358432,ENST00000462805	EPHA2.aAug10,EPHA2.fAug10	uc001aya.1	1.80946	2.50947	3.52598	28.4667	1.26353e-23	1.60956e-21
6:136582615:+,6:136589300:+	BCLAF1	core	NM_001077440	ENST00000353331,ENST00000392348,ENST00000527536,ENST00000529522,ENST00000530429,ENST00000532384,ENST00000533422	BCLAF1.cAug10,BCLAF1.iAug10,BCLAF1.lAug10,BCLAF1.nAug10,BCLAF1.vcAug10	uc003qgy.1,uc011edb.1	1.80655	3.05713	3.23237	28.4652	1.26554e-23	1.61017e-21
8:12956084:+,8:12956856:+	DLC1	core	NM_001164271,NM_006094,NM_182643	ENST00000276297,ENST00000358919,ENST00000510250,ENST00000512044,ENST00000520226	DLC1.aAug10,DLC1.bAug10,DLC1.cAug10,DLC1.dAug10	uc003wwk.1,uc003wwl.1,uc003wwm.2,uc011kxx.1	2.66829	2.88981	3.32864	28.4221	1.32347e-23	1.67006e-21
8:57876623:+,8:57878750:+	IMPAD1	core	NM_017813	ENST00000262644,ENST00000520392	IMPAD1.aAug10,IMPAD1.dAug10	uc003xte.3	2.1695	2.07377	4.18472	28.3355	1.44865e-23	1.78907e-21
1:24973280:+,1:24975350:+	SRRM1	core	NM_005839	ENST00000323848,ENST00000374389,ENST00000447431,ENST00000467454,ENST00000468822,ENST00000478890,ENST00000479034	SRRM1.aAug10,SRRM1.bAug10,SRRM1.cAug10,SRRM1.eAug10,SRRM1.fAug10,SRRM1.iAug10,SRRM1.vdAug10,SRRM1.veAug10	uc001bjm.2,uc009vrh.1,uc010oel.1	2.73355	2.96499	3.18188	28.2979	1.50664e-23	1.84123e-21
10:112055139:+,10:112057325:+	SMNDC1	core	NM_005871	ENST00000369592,ENST00000369603,ENST00000460483	SMNDC1.aAug10,SMNDC1.bAug10,SMNDC1.cAug10,SMNDC1.gAug10,SMNDC1.hAug10	uc001kzb.2,uc001kzc.3	2.42858	2.23345	3.91237	28.2379	1.60426e-23	1.94472e-21
17:62589691:+,17:62594500:+	SMURF2	core	NM_022739	ENST00000262435	SMURF2.aAug10,SMURF2.bAug10,SMURF2.eAug10,SMURF2.fAug10	uc002jep.1	1.18703	2.42764	3.63414	28.2278	1.62142e-23	1.96326e-21
13:79911437:+,13:79915258:+	RBM26	core	NM_022118	ENST00000267229,ENST00000327303,ENST00000438724,ENST00000438737,ENST00000449987,ENST00000484573	RBM26.aAug10,RBM26.bAug10,RBM26.cAug10,RBM26.dAug10,RBM26.eAug10,RBM26.gAug10,RBM26.jAug10,RBM26.kAug10	uc001vkx.2,uc001vky.2,uc001vkz.2,uc001vla.2,uc010tia.1	2.32617	2.29612	3.75259	28.1936	1.68053e-23	2.01557e-21
7:139045068:+,7:139060808:+	LUC7L2	core	NM_016019	ENST00000354926,ENST00000545899	C7orf55andLUC7L2.aAug10	uc003vux.2	2.09533	2.56726	3.87673	28.1857	1.69454e-23	2.02615e-21
14:70795953:+,14:70826236:+	COX16	core	NM_001204090	ENST00000557612	SYNJ2BPandCOX16.gAug10	None	1.16443	2.70358	3.32454	28.1806	1.70374e-23	2.03483e-21
4:187510374:+,4:187516843:+	FAT1	core	NM_005245	ENST00000260147,ENST00000441802,ENST00000500085,ENST00000507105	FAT1.aAug10,FAT1.cAug10,FAT1.eAug10	uc003ize.2,uc003izf.2	1.07457	2.48711	3.72657	28.1715	1.71999e-23	2.04692e-21
X:23803677:+,X:23803803:+	SAT1	core	NM_002970,NR_027783	ENST00000342463,ENST00000379254,ENST00000379270,ENST00000462639,ENST00000463236,ENST00000474223,ENST00000489394	SAT1.aAug10,SAT1.bAug10,SAT1.cAug10,SAT1.fAug10,SAT1.gAug10,SAT1.kAug10,SAT1.lAug10,SAT1.mAug10,SAT1.nAug10	uc004dau.2,uc004dav.2	3.21701	3.08425	2.79672	28.158	1.74466e-23	2.06962e-21
20:37049547:+,20:37049653:+	LOC388796	core	NR_015366,NR_027241	ENST00000414142,ENST00000417578,ENST00000423536,ENST00000436764,ENST00000449469	SNORA71AandSNORA71B.bAug10,SNORA71AandSNORA71B.cAug10,SNORA71AandSNORA71B.dAug10,SNORA71AandSNORA71B.eAug10,SNORA71AandSNORA71B.gAug10,SNORA71AandSNORA71B.hAug10,SNORA71AandSNORA71B.iAug10,SNORA71AandSNORA71B.jAug10,SNORA71AandSNORA71B.kAug10,SNORA71AandSNORA71B.lAug10,SNORA71AandSNORA71B.mAug10,SNORA71AandSNORA71B.nAug10,SNORA71AandSNORA71B.pAug10,SNORA71AandSNORA71B.qAug10,SNORA71AandSNORA71B.r…	uc002xie.3,uc002xif.3,uc002xig.3,uc002xih.3,uc002xii.3,uc002xij.3	2.27759	2.29264	3.81841	28.084	1.88572e-23	2.21448e-21
8:57890704:+,8:57892594:+	IMPAD1	core	NM_017813	ENST00000262644,ENST00000520392	IMPAD1.aAug10,IMPAD1.dAug10	uc003xte.3	2.1695	2.13858	4.00348	28.0347	1.98628e-23	2.31691e-21
14:73544244:+,14:73550202:+	RBM25	core	NM_021239	ENST00000261973,ENST00000525161,ENST00000525321,ENST00000526754,ENST00000527432,ENST00000531500,ENST00000532683,ENST00000540173	RBM25.aAug10,RBM25.bAug10,RBM25.dAug10,RBM25.eAug10,RBM25.fAug10,RBM25.gAug10,RBM25.jAug10	uc001xnn.3,uc001xno.2,uc010ttu.1	2.1353	2.36327	3.70709	28.029	1.99836e-23	2.32342e-21
2:198273305:+,2:198274494:+	SF3B1	core	NM_012433	ENST00000335508	SF3B1.aAug10,SF3B1.bAug10	uc002uue.2	2.02269	2.12952	4.52121	28.0197	2.01802e-23	2.3411e-21
5:52096954:+,5:52097243:+	ITGA1,PELO	core	NM_015946	ENST00000274311	PELOandITGA1andRPL17P21.dAug10	uc003jos.2	2.02926	2.33129	4.51581	28.0143	2.02944e-23	2.35176e-21
5:114952142:+,5:114956132:+	TMED7,TMED7-TICAM2	core	NM_001164468,NM_001164469,NM_181836	ENST00000282382,ENST00000333314,ENST00000408996,ENST00000456936,ENST00000503010	TMED7andTICAM2.aAug10,TMED7andTICAM2.bAug10,TMED7andTICAM2.cAug10,TMED7andTICAM2.eAug10,TMED7andTICAM2.iAug10	uc003krd.2,uc003kre.2,uc003krf.2,uc011cwd.1	2.35631	2.27585	4.24256	27.9624	2.14396e-23	2.45473e-21
4:39512170:+,4:39512281:+	UGDH	core	NM_001184701,NM_003359	ENST00000316423,ENST00000506179,ENST00000507089,ENST00000515021	UGDH.aAug10,UGDH.cAug10,UGDH.dAug10,UGDH.hAug10	uc003guk.1,uc011byp.1	1.72523	2.00857	4.2452	27.9468	2.17954e-23	2.49005e-21
14:91939714:+,14:91942155:+	SMEK1	extended	None	ENST00000428424,ENST00000554943,ENST00000555029,ENST00000555462	SMEK1.cAug10,SMEK1.dAug10	uc001xzn.2,uc010atz.2	3.02269	3.55454	2.56741	27.9156	2.25285e-23	2.56267e-21
4:83778917:+,4:83784471:+	SEC31A	core	NM_016211	ENST00000264405,ENST00000326950,ENST00000348405,ENST00000500777,ENST00000505984,ENST00000512664,ENST00000513858	SEC31A.gAug10,SEC31A.hAug10,SEC31A.jAug10,SEC31A.kAug10,SEC31A.pAug10,SEC31A.rAug10	uc003hne.2,uc003hnj.2,uc003hnk.2,uc003hnl.2,uc011ccl.1	0.556249	2.93417	3.00674	27.8816	2.33537e-23	2.63658e-21
18:61562617:+,18:61564325:+	SERPINB2	core	NM_001143818,NM_002575	ENST00000299502,ENST00000404622,ENST00000413956,ENST00000443281,ENST00000457692,ENST00000482254	SERPINB2.aAug10,SERPINB2.bAug10,SERPINB2.cAug10,SERPINB2.dAug10,SERPINB2.gAug10	uc002ljo.2,uc010dqh.2,uc010xeu.1	3.38162	3.64577	2.52114	27.8286	2.47034e-23	2.75936e-21
12:4460543:+,12:4461426:+	C12orf5	core	NM_020375	ENST00000179259,ENST00000537251	C12orf5.aAug10,C12orf5.bAug10,C12orf5.dAug10	uc001qmp.2	1.90122	2.35747	3.65093	27.8267	2.47536e-23	2.76149e-21
14:45553452:+,14:45564424:+	PRPF39	core	NM_017922	ENST00000355765,ENST00000424478,ENST00000477626,ENST00000553605,ENST00000556782	PRPF39.aAug10,PRPF39.bAug10,PRPF39.cAug10,PRPF39.eAug10,PRPF39.kAug10	uc001wvy.3,uc001wvz.3,uc010and.2	2.37791	2.88933	3.05255	27.8259	2.4775e-23	2.76149e-21
11:128354966:+,11:128355964:+	ETS1	core	NM_001143820,NM_005238	ENST00000319397,ENST00000345075,ENST00000392668,ENST00000526145,ENST00000531611	ETS1.aAug10,ETS1.bAug10,ETS1.cAug10,ETS1.dAug10,ETS1.eAug10	uc001qej.2,uc009zcg.2,uc010sbs.1	2.39711	2.52294	3.64879	27.7305	2.74202e-23	2.99292e-21
7:44836392:+,7:44839301:+	PPIA	novel	NONE	NONE	NONE	NONE	0.796549	11.7451	-0.654903	27.7212	2.76956e-23	3.01985e-21
1:226353701:+,1:226374091:+	ACBD3	core	NM_022735	ENST00000366812	ACBD3.aAug10,ACBD3.bAug10	uc001hpy.2	2.47828	2.67523	3.10511	27.7087	2.80668e-23	3.05016e-21
2:198288698:+,2:198299696:+	SF3B1	core	NM_001005526,NM_012433	ENST00000335508,ENST00000409915,ENST00000414174,ENST00000414963,ENST00000487698	SF3B1.aAug10,SF3B1.cAug10,SF3B1.dAug10,SF3B1.eAug10,SF3B1.jAug10	uc002uue.2,uc002uuf.2,uc002uug.2,uc010fsk.1	2.02269	2.29272	4.84448	27.6958	2.84562e-23	3.08679e-21
7:44838876:+,7:44839301:+	PPIA	extended	None	None	PPIA.gAug10	None	0.796549	3.52069	2.71769	27.6674	2.93293e-23	3.16518e-21
6:136603825:+,6:136610851:+	BCLAF1	core	NM_001077440,NM_001077441,NM_014739	ENST00000353331,ENST00000527536,ENST00000527613,ENST00000527759,ENST00000528229,ENST00000529826,ENST00000530429,ENST00000530767,ENST00000531224,ENST00000532384,ENST00000534269	BCLAF1.aAug10,BCLAF1.bAug10,BCLAF1.cAug10,BCLAF1.dAug10,BCLAF1.eAug10,BCLAF1.fAug10,BCLAF1.vaAug10	uc003qgw.1,uc003qgx.1,uc003qgy.1,uc011edc.1,uc011edd.1,uc011ede.1	1.80655	2.12168	4.16631	27.6138	3.1061e-23	3.32812e-21
2:238296827:+,2:238305370:+	COL6A3	core	NM_057165,NM_057167	ENST00000353578,ENST00000392004,ENST00000409809	COL6A3.bAug10,COL6A3.dAug10	uc002vwo.2,uc002vwq.2	2.01483	2.66727	3.18966	27.5248	3.41657e-23	3.62029e-21
6:109690220:+,6:109697277:+	CD164	core	NM_001142402	ENST00000324953	CD164.dAug10	uc003ptf.2	1.40171	3.7775	2.46296	27.4861	3.56136e-23	3.73132e-21
9:114691958:+,9:114693551:+	UGCG	core	NM_003358	ENST00000374279,ENST00000474306	UGCG.aAug10,UGCG.bAug10,UGCG.gAug10	uc004bft.2	1.87524	2.02322	4.35889	27.4706	3.62135e-23	3.77269e-21
12:88900155:+,12:88900805:+	KITLG	core	NM_000899,NM_003994	ENST00000228280,ENST00000347404,ENST00000357116,ENST00000378535	KITLG.aAug10,KITLG.bAug10,KITLG.cAug10,KITLG.gAug10	uc001tav.2,uc001taw.2	3.45509	3.44757	2.61282	27.4653	3.64195e-23	3.78666e-21
2:70454954:+,2:70456396:+	TIA1	core	NM_022037	ENST00000361692,ENST00000415783,ENST00000445587	TIA1andC2orf42.cAug10,TIA1andC2orf42.kAug10	uc002sgk.3	-0.00956002	3.69428	2.74723	27.4639	3.6477e-23	3.78889e-21
5:95231395:+,5:95233944:+	ELL2	core	NM_012081	ENST00000237853,ENST00000431061,ENST00000508757	ELL2.aAug10,ELL2.bAug10	uc003klr.3	1.76837	2.50024	3.34941	27.4401	3.7422e-23	3.86403e-21
9:114688776:+,9:114691780:+	UGCG	core	NM_003358	ENST00000374279,ENST00000495085	UGCG.aAug10,UGCG.bAug10	uc004bft.2	1.87524	2.08166	3.97656	27.4095	3.86718e-23	3.96984e-21
2:106002997:+,2:106015299:+	FHL2	core	NM_001450	ENST00000393353	FHL2.cAug10	uc002tcy.2,uc002tde.1	2.92614	4.06621	2.49058	27.4049	3.88646e-23	3.98186e-21
1:226352630:+,1:226353560:+	ACBD3	core	NM_022735	ENST00000366812	ACBD3.aAug10,ACBD3.bAug10	uc001hpy.2	2.47828	2.62608	3.5945	27.396	3.92408e-23	4.0087e-21
18:61495631:+,18:61558670:+	SERPINB2	novel	NONE	NONE	NONE	NONE	3.38162	3.63805	2.79232	27.3489	4.12847e-23	4.20524e-21
13:79953042:+,13:79979839:+	RBM26	core	NM_022118	ENST00000267229,ENST00000327303,ENST00000438724	RBM26.aAug10,RBM26.bAug10,RBM26.cAug10,RBM26.eAug10,RBM26.lAug10,RBM26.nAug10	uc001vky.2,uc001vkz.2,uc001vla.2,uc001vlc.1	2.32617	2.71195	3.34391	27.2753	4.4703e-23	4.50546e-21
20:48252996:+,20:48253878:+	B4GALT5	core	NM_004776	ENST00000371711	B4GALT5.aAug10	uc002xuu.3	2.18271	2.13917	3.78942	27.227	4.71013e-23	4.72005e-21
12:59268355:+,12:59270227:+	LRIG3	core	NM_001136051,NM_153377	ENST00000320743,ENST00000379141,ENST00000433272,ENST00000552646	LRIG3.aAug10,LRIG3.bAug10,LRIG3.cAug10,LRIG3.dAug10,LRIG3.eAug10,LRIG3.fAug10	uc001sqr.2,uc009zqh.2,uc010ssh.1	2.08927	2.36059	3.54306	27.2048	4.82467e-23	4.82105e-21
4:138449795:+,4:138449886:+	PCDH18	core	NM_019035	ENST00000344876,ENST00000412923,ENST00000507846,ENST00000510305,ENST00000511115	PCDH18.aAug10,PCDH18.bAug10,PCDH18.cAug10,PCDH18.dAug10,PCDH18.eAug10,PCDH18.fAug10,PCDH18.gAug10,PCDH18.hAug10	uc003ihe.3,uc003ihf.3,uc003ihg.3,uc011cgz.1,uc011cha.1	2.60728	2.57534	3.6753	27.1915	4.89495e-23	4.882e-21
13:79916966:+,13:79918383:+	RBM26	core	NM_022118	ENST00000267229,ENST00000327303,ENST00000438724,ENST00000438737,ENST00000484573	RBM26.aAug10,RBM26.bAug10,RBM26.cAug10,RBM26.dAug10,RBM26.eAug10,RBM26.gAug10,RBM26.uAug10	uc001vkx.2,uc001vky.2,uc001vkz.2,uc001vla.2,uc010tia.1	2.32617	2.33185	3.52118	27.188	4.91387e-23	4.89161e-21
13:96416207:+,13:96438193:+	DNAJC3	core	NM_006260	ENST00000376795	DNAJC3.aAug10,DNAJC3.bAug10	uc001vmq.2,uc001vmr.2	2.54568	2.77229	2.89563	27.1457	5.1448e-23	5.03573e-21
7:41730140:+,7:41739585:+	INHBA,LOC285954	core	NM_002192	ENST00000242208,ENST00000442711	INHBA.aAug10,INHBA.bAug10	uc003thq.2,uc003thr.2	2.02146	2.12895	4.24386	27.1417	5.16723e-23	5.04842e-21
5:35857161:+,5:35860954:+	IL7R	core	NM_002185	ENST00000303115,ENST00000343305,ENST00000506850,ENST00000508941,ENST00000511982,ENST00000514217,ENST00000515665	IL7R.aAug10,IL7R.bAug10,IL7R.dAug10,IL7R.eAug10,IL7R.fAug10,IL7R.gAug10,IL7R.mAug10	uc003jjs.2,uc011coo.1,uc011cop.1	0.718086	2.22579	3.78799	27.0977	5.4203e-23	5.25165e-21
8:12968332:+,8:12973095:+	DLC1	core	NM_001164271,NM_006094,NM_182643	ENST00000276297,ENST00000358919,ENST00000503161,ENST00000509922,ENST00000512044,ENST00000515225,ENST00000520226	DLC1.aAug10,DLC1.bAug10,DLC1.cAug10,DLC1.dAug10,DLC1.lAug10	uc003wwk.1,uc003wwl.1,uc003wwm.2,uc011kxx.1	2.66829	2.5469	3.47116	27.0962	5.42922e-23	5.25545e-21
2:55200757:+,2:55209651:+	RTN4	extended	None	ENST00000486085	None	None	-0.510336	5.71295	1.96593	27.0932	5.44683e-23	5.26339e-21
21:34948199:+,21:34948724:+	SON	extended	None	ENST00000436227,ENST00000455528,ENST00000467616,ENST00000470533,ENST00000478183,ENST00000484294,ENST00000491794	SON.bAug10,SON.dAug10,SON.gAug10,SON.hAug10,SON.pAug10	uc002ysd.2,uc002ysh.2	2.34302	2.24229	3.81899	27.0712	5.57882e-23	5.37062e-21
14:73578510:+,14:73578860:+	RBM25	core	NM_021239	ENST00000261973,ENST00000527432,ENST00000527449,ENST00000528081,ENST00000532483,ENST00000532683	RBM25.aAug10,RBM25.bAug10,RBM25.cAug10,RBM25.dAug10,RBM25.hAug10,RBM25.iAug10	uc001xno.2,uc001xnp.2,uc010ttu.1	2.1353	2.03439	3.86585	27.0614	5.63866e-23	5.41337e-21
13:79941007:+,13:79942865:+	RBM26	core	NM_022118	ENST00000267229,ENST00000327303,ENST00000438724,ENST00000438737,ENST00000484573	RBM26.aAug10,RBM26.bAug10,RBM26.cAug10,RBM26.dAug10,RBM26.eAug10,RBM26.hAug10,RBM26.iAug10	uc001vkx.2,uc001vky.2,uc001vkz.2,uc001vla.2,uc001vlb.1	2.32617	2.61727	3.1913	27.056	5.67226e-23	5.43076e-21
5:95226978:+,5:95231332:+	ELL2	core	NM_012081	ENST00000237853,ENST00000431061,ENST00000508757	ELL2.aAug10,ELL2.bAug10	uc003klr.3	1.76837	2.3653	3.45844	26.9911	6.08805e-23	5.74006e-21
14:45566208:+,14:45571732:+	PRPF39	core	NM_017922	ENST00000355765,ENST00000355846,ENST00000424478,ENST00000477626,ENST00000554081,ENST00000554429,ENST00000554439,ENST00000557477	PRPF39.aAug10,PRPF39.bAug10,PRPF39.cAug10,PRPF39.lAug10	uc001wvy.3,uc001wvz.3,uc010and.2	2.37791	2.64941	3.08832	26.9682	6.24236e-23	5.8593e-21
20:48253979:+,20:48256215:+	B4GALT5	core	NM_004776	ENST00000371711	B4GALT5.aAug10	uc002xuu.3	2.18271	2.1096	4.11326	26.9538	6.34135e-23	5.94161e-21
11:810039:+,11:811597:+	RPLP2	extended	None	None	RPLP2andSNORA52.iAug10	None	1.16904	2.23702	3.71718	26.9395	6.44137e-23	6.00325e-21
13:79929519:+,13:79932409:+	RBM26	core	NM_022118	ENST00000267229,ENST00000327303,ENST00000438724,ENST00000438737,ENST00000484573	RBM26.aAug10,RBM26.bAug10,RBM26.cAug10,RBM26.dAug10,RBM26.eAug10,RBM26.fAug10,RBM26.gAug10	uc001vkx.2,uc001vky.2,uc001vkz.2,uc001vla.2	2.32617	2.54403	3.12924	26.9364	6.46384e-23	6.01887e-21
20:47895275:+,20:47895641:+	NCRNA00275	core	NR_036659	ENST00000326677,ENST00000428008	NCRNA00275andSNORD12CandSNORD12B.dAug10,NCRNA00275andSNORD12CandSNORD12B.nAug10,NCRNA00275andSNORD12CandSNORD12B.oAug10,NCRNA00275andSNORD12CandSNORD12B.pAug10,NCRNA00275andSNORD12CandSNORD12B.sAug10	uc002xuo.2	1.7613	2.33781	3.82592	26.9179	6.59574e-23	6.13084e-21
2:114195599:+,2:114198928:+	CBWD2	core	NM_172003	ENST00000259199,ENST00000376448,ENST00000416503,ENST00000448780,ENST00000456188,ENST00000463627,ENST00000490323,ENST00000492566	CBWD2.aAug10,CBWD2.cAug10,CBWD2.dAug10,CBWD2.iAug10	uc002tjt.2,uc002tju.2,uc010fkv.2	0.270791	2.4332	3.34112	26.8888	6.80957e-23	6.31241e-21
2:238290142:+,2:238296225:+	COL6A3	core	NM_004369,NM_057165,NM_057167	ENST00000295550,ENST00000346358,ENST00000353578,ENST00000392004,ENST00000409809,ENST00000433762	COL6A3.aAug10,COL6A3.bAug10,COL6A3.dAug10,COL6A3.fAug10	uc002vwl.2,uc002vwo.2,uc002vwq.2,uc010znk.1	2.01483	2.56783	3.42154	26.8872	6.82143e-23	6.31241e-21
5:143543820:+,5:143544996:+	YIPF5	core	NM_001024947,NM_030799	ENST00000274496,ENST00000377986,ENST00000448443,ENST00000503333,ENST00000508754,ENST00000513112,ENST00000519064,ENST00000522203,ENST00000536767	YIPF5.aAug10,YIPF5.bAug10,YIPF5.cAug10,YIPF5.dAug10,YIPF5.eAug10,YIPF5.fAug10,YIPF5.gAug10	uc003lnk.3,uc003lnl.3,uc010jgl.2	1.60564	2.06745	4.21065	26.8679	6.96734e-23	6.41953e-21
12:59282254:+,12:59282601:+	LRIG3	core	NM_001136051,NM_153377	ENST00000320743,ENST00000379141,ENST00000433272	LRIG3.aAug10,LRIG3.bAug10,LRIG3.cAug10,LRIG3.eAug10	uc001sqr.2,uc009zqh.2,uc010ssh.1	2.08927	2.33157	3.50719	26.8572	7.04975e-23	6.46714e-21
5:75914467:+,5:75918992:+	F2RL2,IQGAP2	core	NM_004101	ENST00000296641	F2RL2.aAug10	uc003kem.2	2.37679	2.37712	3.51731	26.8197	7.34567e-23	6.70354e-21
1:24979523:+,1:24981346:+	SRRM1	core	NM_005839	ENST00000323848,ENST00000374389,ENST00000447431,ENST00000479034,ENST00000496882	SRRM1.aAug10,SRRM1.bAug10,SRRM1.cAug10,SRRM1.dAug10,SRRM1.fAug10,SRRM1.gAug10,SRRM1.hAug10	uc001bjm.2,uc009vrh.1,uc009vri.1,uc010oel.1	2.73355	2.79081	2.9299	26.8087	7.43517e-23	6.76177e-21
1:24981620:+,1:24987210:+	SRRM1	core	NM_005839	ENST00000323848,ENST00000374389,ENST00000479034,ENST00000488317	SRRM1.bAug10,SRRM1.gAug10,SRRM1.hAug10	uc001bjm.2	2.73355	2.413	3.23952	26.795	7.54787e-23	6.82884e-21
13:79946065:+,13:79951514:+	RBM26	core	NM_022118	ENST00000267229,ENST00000327303,ENST00000438724,ENST00000438737	RBM26.aAug10,RBM26.bAug10,RBM26.cAug10,RBM26.eAug10,RBM26.lAug10,RBM26.mAug10,RBM26.rAug10	uc001vky.2,uc001vkz.2,uc001vla.2	2.32617	2.60257	3.10909	26.7879	7.60698e-23	6.85935e-21
5:158609059:+,5:158621724:+	RNF145	core	NM_001199380,NM_001199381,NM_001199382,NM_001199383,NM_144726	ENST00000274542,ENST00000413445,ENST00000424310,ENST00000518802,ENST00000519865,ENST00000520548,ENST00000520638,ENST00000521606,ENST00000535312	RNF145.aAug10,RNF145.bAug10,RNF145.cAug10,RNF145.dAug10,RNF145.eAug10,RNF145.fAug10	uc003lxo.1,uc003lxp.2,uc010jiq.1,uc011ddy.1,uc011ddz.1,uc011dea.1	1.63576	2.32636	3.55814	26.7878	7.60766e-23	6.85935e-21
11:65622919:+,11:65623406:+	CFL1	novel	NONE	NONE	NONE	NONE	1.10529	6.87325	2.33144	26.668	8.68158e-23	7.7283e-21
12:59274683:+,12:59276651:+	LRIG3	core	NM_001136051,NM_153377	ENST00000320743,ENST00000379141,ENST00000433272,ENST00000547329	LRIG3.aAug10,LRIG3.bAug10,LRIG3.cAug10,LRIG3.dAug10,LRIG3.eAug10,LRIG3.iAug10	uc001sqr.2,uc009zqh.2,uc010ssh.1	2.08927	2.61858	3.49569	26.6435	8.92038e-23	7.90742e-21
17:39845321:+,17:39846340:+	EIF1	extended	None	ENST00000310837	EIF1.iAug10	uc002hxk.2	0.449944	4.41744	2.18431	26.624	9.11491e-23	8.05273e-21
7:94027070:+,7:94028361:+	COL1A2	novel	NONE	NONE	NONE	NONE	1.21804	6.12361	1.8369	26.5906	9.45809e-23	8.32098e-21
3:178745311:+,3:178745434:+	ZMAT3	core	NM_022470,NM_152240	ENST00000311417,ENST00000432729	ZMAT3.aAug10,ZMAT3.bAug10,ZMAT3.cAug10	uc003fjg.2,uc003fji.2,uc010hxa.2	3.48829	3.5761	2.80085	26.5661	9.71852e-23	8.51451e-21
13:79915362:+,13:79916799:+	RBM26	core	NM_022118	ENST00000267229,ENST00000327303,ENST00000438724,ENST00000438737,ENST00000484573	RBM26.aAug10,RBM26.bAug10,RBM26.cAug10,RBM26.dAug10,RBM26.eAug10,RBM26.gAug10	uc001vkx.2,uc001vky.2,uc001vkz.2,uc001vla.2,uc010tia.1	2.32617	2.29186	3.66585	26.558	9.80623e-23	8.57706e-21
1:226342534:+,1:226346885:+	ACBD3	core	NM_022735	ENST00000366812	ACBD3.aAug10	uc001hpy.2	2.47828	2.29359	3.53319	26.5442	9.9572e-23	8.67307e-21
12:6787626:+,12:6788112:+	ZNF384	extended	None	ENST00000319770,ENST00000436774,ENST00000535485,ENST00000542796	ZNF384.gAug10,ZNF384.hAug10,ZNF384.iAug10,ZNF384.kAug10	uc001qqb.2,uc001qqe.2	0.45717	3.34016	2.43526	26.5297	1.01186e-22	8.79906e-21
5:138650425:+,5:138651765:+	MATR3	extended	None	ENST00000513678,ENST00000515833	SNHG4andMATR3.pAug10	None	0.973175	5.67498	1.81983	26.4849	1.06352e-22	9.1951e-21
7:43647999:+,7:43659196:+	STK17A	core	NM_004760	ENST00000319357,ENST00000462448	STK17A.aAug10	uc003tih.2	2.24179	2.20921	4.07178	26.4812	1.06789e-22	9.22535e-21
11:62621305:+,11:62621991:+	SNHG1	extended	None	ENST00000537869,ENST00000538266,ENST00000540865,ENST00000545440	SNHG1_.bAug10,SNHG1_.nAug10,SNHG1_.rAug10,SNHG1_.veAug10,SNHG1_.vsAug10,SNHG1_.vuAug10,SNHG1_.vwAug10	uc001nvq.2	-0.152273	3.46665	2.42783	26.4512	1.10411e-22	9.51478e-21
20:3870375:+,20:3888573:+	PANK2	core	NM_153638	ENST00000316562,ENST00000336066	PANK2.aAug10,PANK2.dAug10,PANK2.eAug10,PANK2.fAug10	uc002wkc.2,uc002wkd.2	-0.829662	2.92791	3.29321	26.4317	1.12835e-22	9.69989e-21
14:69349309:+,14:69350885:+	ACTN1	extended	None	ENST00000553290	ACTN1.fAug10	None	0.191275	3.32885	2.57908	26.3746	1.20242e-22	1.02695e-20
20:47711500:+,20:47712713:+	CSE1L	extended	None	ENST00000469700	CSE1L.hAug10,CSE1L.rAug10	uc010zyh.1	0.172469	4.36116	2.1359	26.3544	1.22984e-22	1.04527e-20
8:12952466:+,8:12952595:+	DLC1	core	NM_001164271,NM_006094,NM_182643	ENST00000276297,ENST00000358919,ENST00000510250,ENST00000510318,ENST00000512044,ENST00000513883,ENST00000520226	DLC1.aAug10,DLC1.bAug10,DLC1.cAug10,DLC1.dAug10,DLC1.fAug10,DLC1.mAug10	uc003wwk.1,uc003wwl.1,uc003wwm.2,uc011kxx.1	2.66829	2.55195	3.69101	26.3521	1.2331e-22	1.04684e-20
8:12950334:+,8:12952268:+	DLC1	core	NM_001164271,NM_006094,NM_182643	ENST00000276297,ENST00000358919,ENST00000510318,ENST00000512044,ENST00000520226	DLC1.aAug10,DLC1.bAug10,DLC1.cAug10,DLC1.dAug10,DLC1.fAug10	uc003wwk.1,uc003wwl.1,uc003wwm.2,uc011kxx.1	2.66829	2.82792	3.41828	26.2541	1.37594e-22	1.14812e-20
18:32919940:+,18:32920195:+	ZNF24	core	NM_006965	ENST00000261332,ENST00000399061	ZNF24.aAug10,ZNF24.bAug10,ZNF24.cAug10	uc002kys.2,uc002kyt.2,uc002kyu.1	2.68492	2.98478	3.10193	26.2493	1.38332e-22	1.15089e-20
13:79945297:+,13:79945977:+	RBM26	core	NM_022118	ENST00000267229,ENST00000327303,ENST00000438724,ENST00000438737	RBM26.aAug10,RBM26.bAug10,RBM26.cAug10,RBM26.dAug10,RBM26.eAug10,RBM26.mAug10	uc001vky.2,uc001vkz.2,uc001vla.2	2.32617	2.66813	3.06135	26.2294	1.4145e-22	1.17008e-20
13:96439409:+,13:96443127:+	DNAJC3	core	NM_006260	ENST00000376795	DNAJC3.aAug10,DNAJC3.bAug10	uc001vmq.2,uc001vmr.2	2.54568	2.66187	3.08902	26.2167	1.43489e-22	1.18509e-20
10:116606992:+,10:116608406:+	FAM160B1	core	NM_001135051,NM_020940	ENST00000369248,ENST00000369250	FAM160B1andRPL15P13.aAug10,FAM160B1andRPL15P13.bAug10	uc001lcb.2,uc001lcc.2	3.41984	3.36876	2.53417	26.2105	1.44478e-22	1.19046e-20
2:197002453:+,2:197004344:+	STK17B	core	NM_004226	ENST00000263955,ENST00000409228	STK17B.aAug10,STK17B.bAug10	uc002utk.2,uc010fsh.2	2.49976	2.48964	3.54753	26.1649	1.52074e-22	1.2433e-20
20:48260187:+,20:48263502:+	B4GALT5	core	NM_004776	ENST00000371711	B4GALT5.aAug10,B4GALT5.bAug10	uc002xuu.3	2.18271	2.0711	3.65281	26.1591	1.53069e-22	1.25048e-20
7:45143042:+,7:45145040:+	TBRG4	core	NM_030900,NM_199122	ENST00000361278,ENST00000395655	TBRG4_.dAug10,TBRG4_.eAug10	uc003tmw.2,uc003tmx.2	0.662115	2.70995	2.88348	26.1534	1.54051e-22	1.25655e-20
10:116620648:+,10:116620990:+	FAM160B1	core	NM_001135051,NM_020940	ENST00000369248,ENST00000369250,ENST00000411414	FAM160B1andRPL15P13.aAug10,FAM160B1andRPL15P13.bAug10,FAM160B1andRPL15P13.dAug10	uc001lcb.2,uc001lcc.2	3.41984	3.04654	2.85205	26.1033	1.63e-22	1.32645e-20
9:114693637:+,9:114694450:+	UGCG	core	NM_003358	ENST00000374279	UGCG.aAug10,UGCG.bAug10	uc004bft.2	1.87524	2.06109	4.37952	26.0996	1.6368e-22	1.33096e-20
10:116605240:+,10:116605772:+	FAM160B1	core	NM_001135051,NM_020940	ENST00000369248,ENST00000369250	FAM160B1andRPL15P13.aAug10,FAM160B1andRPL15P13.bAug10,FAM160B1andRPL15P13.cAug10	uc001lcb.2,uc001lcc.2	3.41984	3.56788	2.30539	26.0881	1.65804e-22	1.34511e-20
18:19192404:+,18:19203709:+	SNRPD1	extended	None	None	SNRPD1.dAug10	None	0.688983	6.28341	1.94021	26.0728	1.68698e-22	1.36313e-20
12:46761123:+,12:46764559:+	SLC38A2	extended	None	ENST00000549258	SLC38A2.bAug10	uc001rph.2	0.479917	3.83805	2.25822	26.0649	1.702e-22	1.37125e-20
1:24979119:+,1:24979404:+	SRRM1	core	NM_005839	ENST00000323848,ENST00000447431,ENST00000470243,ENST00000479034,ENST00000496882,ENST00000537199	SRRM1.aAug10,SRRM1.bAug10,SRRM1.cAug10,SRRM1.dAug10,SRRM1.eAug10,SRRM1.fAug10,SRRM1.gAug10,SRRM1.hAug10	uc001bjm.2,uc009vrh.1,uc009vri.1,uc010oel.1,uc010oem.1	2.73355	2.83654	2.77998	26.0329	1.76465e-22	1.41415e-20
12:59281714:+,12:59282111:+	LRIG3	core	NM_001136051,NM_153377	ENST00000320743,ENST00000379141,ENST00000433272	LRIG3.aAug10,LRIG3.bAug10,LRIG3.cAug10,LRIG3.eAug10	uc001sqr.2,uc009zqh.2,uc010ssh.1	2.08927	2.46952	3.30055	26.0011	1.82922e-22	1.45923e-20
1:24996078:+,1:24996611:+	SRRM1	core	NM_005839	ENST00000323848,ENST00000374389,ENST00000447431,ENST00000479034	SRRM1.aAug10,SRRM1.bAug10,SRRM1.dAug10	uc001bjm.2,uc009vri.1,uc010oel.1	2.73355	2.60753	3.25238	25.9453	1.94846e-22	1.53803e-20
19:9722012:+,19:9724697:+	ZNF561	core	NM_152289	ENST00000302851,ENST00000424629,ENST00000443819,ENST00000444611,ENST00000465974,ENST00000483768,ENST00000494276,ENST00000495503	ZNF562andZNF561.aAug10,ZNF562andZNF561.bAug10,ZNF562andZNF561.cAug10,ZNF562andZNF561.gAug10,ZNF562andZNF561.nAug10,ZNF562andZNF561.oAug10,ZNF562andZNF561.qAug10,ZNF562andZNF561.vaAug10,ZNF562andZNF561.vbAug10,ZNF562andZNF561.vfAug10	uc002mlu.2,uc010dwu.2	2.29012	2.74149	2.84923	25.9433	1.9527e-22	1.54022e-20
8:99055003:+,8:99057575:+	RPL30	extended	None	ENST00000523172	None	None	1.04338	3.28037	2.78768	25.9382	1.96422e-22	1.54467e-20
17:7481234:+,17:7481660:+	EIF4A1	extended	None	None	SENP3_.jAug10	uc002ghq.1	0.994963	5.59094	1.77333	25.9097	2.02872e-22	1.58827e-20
4:152024231:+,4:152025624:+	RPS3A	extended	None	None	RPS3AandSNORD73A.fAug10,RPS3AandSNORD73A.pAug10	None	1.00678	6.43794	2.1275	25.892	2.06983e-22	1.61206e-20
2:189906419:+,2:189907877:+	COL5A2	novel	NONE	NONE	NONE	NONE	1.2239	11.1775	-0.939101	25.8797	2.09884e-22	1.62863e-20
1:150321694:+,1:150325309:+	PRPF3	core	NM_004698	ENST00000324862,ENST00000414970,ENST00000467329,ENST00000470824	PRPF3.aAug10,PRPF3.bAug10,PRPF3.cAug10,PRPF3.eAug10,PRPF3.kAug10,PRPF3.lAug10,PRPF3.mAug10,PRPF3.nAug10,PRPF3.qAug10	uc001eum.3,uc010pca.1,uc010pcb.1	2.44204	2.60492	3.06774	25.7878	2.32999e-22	1.78952e-20
5:76012220:+,5:76028139:+	F2R	core	NM_001992	ENST00000319211	F2R.bAug10	uc003ken.3	2.35206	2.35083	3.29819	25.7565	2.41469e-22	1.84514e-20
12:46756421:+,12:46757509:+	SLC38A2	extended	None	ENST00000548111	SLC38A2.dAug10	None	0.479917	3.54461	2.56657	25.7546	2.41979e-22	1.8477e-20
5:96512995:+,5:96513436:+	RIOK2	core	NM_001159749,NM_018343	ENST00000283109,ENST00000508447,ENST00000508991	RIOK2.aAug10,RIOK2.bAug10,RIOK2.dAug10	uc003kmz.2,uc003kna.3	1.9345	2.14635	3.52213	25.7384	2.46503e-22	1.87543e-20
2:197010779:+,2:197021163:+	STK17B	core	NM_004226	ENST00000263955,ENST00000409228	STK17B.aAug10,STK17B.bAug10	uc002utk.2,uc010fsh.2	2.49976	2.61728	2.9869	25.7299	2.48897e-22	1.89092e-20
7:38254706:+,7:38256789:+	STARD3NL	extended	None	ENST00000434197	STARD3NL.eAug10	uc003tft.2	0.21751	4.25584	2.05208	25.6928	2.59674e-22	1.95994e-20
20:34317287:+,20:34319863:+	RBM39	core	NM_001242599,NM_001242600	ENST00000427743,ENST00000528062	RBM39.cAug10,RBM39.eAug10	uc002xeg.2,uc010zvm.1	0.714398	5.99038	1.97643	25.6923	2.59845e-22	1.95994e-20
X:23803546:+,X:23803637:+	SAT1	core	NM_002970,NR_027783	ENST00000379254,ENST00000379270,ENST00000463236,ENST00000474223,ENST00000489394	SAT1.aAug10,SAT1.bAug10,SAT1.cAug10,SAT1.fAug10,SAT1.gAug10,SAT1.kAug10,SAT1.lAug10,SAT1.nAug10	uc004dau.2,uc004dav.2	3.21701	3.11018	2.63184	25.6778	2.64188e-22	1.98436e-20
5:114956377:+,5:114961298:+	TMED7,TMED7-TICAM2	core	NM_001164468,NM_001164469,NM_181836	ENST00000282382,ENST00000333314,ENST00000408996,ENST00000456936,ENST00000508420	TMED7andTICAM2.aAug10,TMED7andTICAM2.bAug10,TMED7andTICAM2.cAug10,TMED7andTICAM2.dAug10,TMED7andTICAM2.fAug10,TMED7andTICAM2.iAug10	uc003krd.2,uc003kre.2,uc003krf.2	2.35631	2.43461	3.36947	25.6596	2.69716e-22	2.01133e-20
1:24989295:+,1:24993306:+	SRRM1	core	NM_005839	ENST00000323848	SRRM1.bAug10,SRRM1.lAug10	uc001bjm.2	2.73355	4.2532	1.9552	25.6448	2.74354e-22	2.04157e-20
12:57038739:+,12:57039621:+	ATP5B	extended	None	ENST00000551020,ENST00000552959	ATP5BandSNORD59AandSNORD59B.bAug10,ATP5BandSNORD59AandSNORD59B.dAug10	None	0.732724	3.6624	2.36319	25.6315	2.78541e-22	2.06834e-20
7:43659322:+,7:43663171:+	STK17A	core	NM_004760	ENST00000319357	STK17A.aAug10	uc003tih.2	2.24179	2.1672	3.77657	25.6142	2.84138e-22	2.101e-20
14:91939714:+,14:91942194:+	SMEK1	core	NM_032560	ENST00000337238,ENST00000554308,ENST00000554390,ENST00000554684	SMEK1.aAug10,SMEK1.bAug10,SMEK1.hAug10	uc001xzm.2,uc001xzo.2,uc001xzp.1	3.02269	2.71608	2.8516	25.5721	2.98181e-22	2.19405e-20
8:12973166:+,8:12990453:+	DLC1	core	NM_006094	ENST00000358919,ENST00000515225	DLC1.cAug10,DLC1.lAug10,DLC1.rAug10	uc003wwk.1	2.66829	2.88137	3.18132	25.5604	3.02217e-22	2.21644e-20
14:20793812:+,14:20794875:+	CCNB1IP1	core	NM_021178,NM_182849,NM_182851,NM_182852	ENST00000353689,ENST00000358932,ENST00000398160,ENST00000398163,ENST00000398169,ENST00000437553,ENST00000553291,ENST00000553516,ENST00000555348,ENST00000555963,ENST00000556204,ENST00000556563,ENST00000556854,ENST00000557114,ENST00000557665	CCNB1IP1.aAug10,CCNB1IP1.cAug10,CCNB1IP1.eAug10,CCNB1IP1.fAug10,CCNB1IP1.gAug10,CCNB1IP1.hAug10,CCNB1IP1.iAug10,CCNB1IP1.jAug10,CCNB1IP1.kAug10,CCNB1IP1.mAug10,CCNB1IP1.nAug10	uc001vwv.2,uc001vww.2,uc001vwx.2,uc001vwy.2,uc001vwz.2,uc010ahh.1	2.03357	2.00276	4.1695	25.4919	3.26981e-22	2.38594e-20
2:36739537:+,2:36744470:+	CRIM1	novel	NONE	NONE	NONE	NONE	0.717236	6.19456	2.05944	25.4893	3.27938e-22	2.38961e-20
14:74387808:+,14:74390098:+	ZNF410	core	NM_001242926	ENST00000324593,ENST00000541357	PTGR2andZNF410.cAug10,PTGR2andZNF410.viAug10	uc001xpb.1,uc010tuf.1	1.33556	2.9522	2.65724	25.4866	3.28996e-22	2.39566e-20
2:197021375:+,2:197027986:+	STK17B	core	NM_004226	ENST00000263955,ENST00000409228,ENST00000420683	STK17B.aAug10,STK17B.bAug10,STK17B.dAug10	uc002utk.2,uc010fsh.2	2.49976	2.39653	3.17922	25.457	3.40377e-22	2.46829e-20
12:6780004:+,12:6782382:+	ZNF384	core	NM_001039920,NM_133476	ENST00000319770,ENST00000355772,ENST00000396795,ENST00000396799	ZNF384.cAug10,ZNF384.dAug10,ZNF384.eAug10,ZNF384.fAug10,ZNF384.gAug10,ZNF384.hAug10,ZNF384.lAug10	uc001qpz.2,uc001qqa.2,uc001qqb.2,uc001qqc.2,uc001qqd.2,uc001qqe.2	0.45717	2.41047	3.18635	25.4548	3.41235e-22	2.4728e-20
14:45565431:+,14:45566090:+	PRPF39	core	NM_017922	ENST00000355765	PRPF39.aAug10	uc001wvz.3	2.37791	3.95569	2.40296	25.4205	3.5502e-22	2.5674e-20
12:59266598:+,12:59267837:+	LRIG3	core	NM_001136051,NM_153377	ENST00000320743,ENST00000379141,ENST00000433272	LRIG3.aAug10,LRIG3.bAug10,LRIG3.cAug10,LRIG3.dAug10,LRIG3.eAug10	uc001sqr.2,uc009zqh.2,uc010ssh.1	2.08927	2.31961	3.46668	25.4189	3.55663e-22	2.57027e-20
19:36706098:+,19:36719650:+	ZNF146	core	NM_001099638	ENST00000456324	ZNF146.eAug10,ZNF146.vdAug10	uc010eeu.2	0.751049	2.83848	2.90147	25.4148	3.57355e-22	2.57896e-20
17:65340896:+,17:65341861:+	PSMD12	core	NM_002816,NM_174871	ENST00000356126,ENST00000357146	PSMD12.aAug10,PSMD12.bAug10,PSMD12.cAug10,PSMD12.dAug10	uc002jfy.2,uc002jfz.2,uc002jga.2	2.49913	2.01505	4.09699	25.3969	3.64812e-22	2.62378e-20
X:102933579:+,X:102940099:+	MORF4L2	core	NM_001142419,NM_012286	ENST00000441076,ENST00000467755	MORF4L2.eAug10,MORF4L2.lAug10,MORF4L2.vkAug10,MORF4L2.vmAug10,MORF4L2.voAug10,MORF4L2.vrAug10	uc004ekx.2,uc004elf.2	-0.409694	2.09803	3.83014	25.3739	3.74661e-22	2.68544e-20
12:59270385:+,12:59271182:+	LRIG3	core	NM_001136051,NM_153377	ENST00000320743,ENST00000379141,ENST00000433272,ENST00000552646	LRIG3.aAug10,LRIG3.bAug10,LRIG3.cAug10,LRIG3.dAug10,LRIG3.eAug10,LRIG3.fAug10	uc001sqr.2,uc009zqh.2,uc010ssh.1	2.08927	2.4387	3.30606	25.3147	4.01218e-22	2.8544e-20
5:126874835:+,5:126883511:+	PRRC1	core	NM_130809	ENST00000296666,ENST00000330542,ENST00000442138,ENST00000512535,ENST00000512635	PRRC1.aAug10,PRRC1.bAug10,PRRC1.cAug10	uc003kuj.3,uc003kuk.2	1.59029	2.14955	3.91806	25.2967	4.09669e-22	2.91059e-20
1:226340320:+,1:226342348:+	ACBD3	core	NM_022735	ENST00000366812	ACBD3.aAug10	uc001hpy.2	2.47828	2.26293	3.6671	25.2933	4.11303e-22	2.91629e-20
13:96438325:+,13:96439261:+	DNAJC3	core	NM_006260	ENST00000376795	DNAJC3.aAug10,DNAJC3.bAug10,DNAJC3.eAug10	uc001vmq.2,uc001vmr.2	2.54568	2.56435	3.20882	25.2777	4.18798e-22	2.96144e-20
13:96410050:+,13:96412294:+	DNAJC3	core	NM_006260	ENST00000376795	DNAJC3.aAug10,DNAJC3.hAug10	uc001vmq.2	2.54568	2.49653	3.24296	25.2604	4.2729e-22	3.01947e-20
11:118625596:+,11:118626111:+	DDX6	core	NM_004397	ENST00000264018,ENST00000526070,ENST00000529162,ENST00000534980	DDX6.aAug10,DDX6.bAug10,DDX6.cAug10,DDX6.dAug10	uc001pua.2,uc001pub.2,uc001puc.2	1.93343	2.06874	3.74709	25.2587	4.28158e-22	3.02357e-20
12:59271634:+,12:59272606:+	LRIG3	core	NM_001136051,NM_153377	ENST00000320743,ENST00000379141,ENST00000433272	LRIG3.aAug10,LRIG3.bAug10,LRIG3.cAug10,LRIG3.dAug10,LRIG3.eAug10	uc001sqr.2,uc009zqh.2,uc010ssh.1	2.08927	2.45658	3.44662	25.2581	4.28455e-22	3.02364e-20
12:59268112:+,12:59268212:+	LRIG3	core	NM_001136051,NM_153377	ENST00000320743,ENST00000379141,ENST00000433272,ENST00000550825	LRIG3.aAug10,LRIG3.bAug10,LRIG3.cAug10,LRIG3.dAug10,LRIG3.eAug10,LRIG3.gAug10	uc001sqr.2,uc009zqh.2,uc010ssh.1	2.08927	2.35862	3.58419	25.2561	4.29423e-22	3.02844e-20
8:81903765:+,8:81905338:+	PAG1	core	NM_018440	ENST00000220597	PAG1.bAug10	uc003ybz.2	2.96417	3.69223	2.27818	25.2333	4.40942e-22	3.09515e-20
1:24978103:+,1:24978925:+	SRRM1	core	NM_005839	ENST00000323848,ENST00000374389,ENST00000447431,ENST00000467454,ENST00000468822,ENST00000470243,ENST00000479034,ENST00000485441,ENST00000494934,ENST00000537199	SRRM1.aAug10,SRRM1.bAug10,SRRM1.cAug10,SRRM1.dAug10,SRRM1.eAug10,SRRM1.fAug10,SRRM1.iAug10,SRRM1.jAug10,SRRM1.mAug10	uc001bjm.2,uc009vrh.1,uc009vri.1,uc010oel.1,uc010oem.1	2.73355	2.6723	2.94638	25.2039	4.56293e-22	3.19014e-20
1:150315928:+,1:150316638:+	PRPF3	core	NM_004698	ENST00000324862,ENST00000414970,ENST00000467329,ENST00000493553,ENST00000543398	PRPF3.aAug10,PRPF3.bAug10,PRPF3.cAug10,PRPF3.dAug10,PRPF3.eAug10,PRPF3.fAug10,PRPF3.rAug10	uc001eum.3,uc009wlp.2,uc009wlq.1,uc010pca.1,uc010pcb.1	2.44204	2.46333	3.05451	25.1653	4.77247e-22	3.32339e-20
5:55237647:+,5:55238498:+	IL6ST	core	NM_001190981,NM_002184,NM_175767	ENST00000336909,ENST00000381286,ENST00000381287,ENST00000381293,ENST00000381294,ENST00000381298,ENST00000503773,ENST00000523039,ENST00000536319	IL6ST.aAug10,IL6ST.bAug10,IL6ST.cAug10,IL6ST.dAug10,IL6ST.eAug10,IL6ST.gAug10,IL6ST.hAug10	uc003jqq.2,uc003jqr.2,uc010iwb.2,uc010iwc.2,uc010iwd.2,uc011cqk.1	1.90077	2.01727	3.98065	25.1181	5.0427e-22	3.48161e-20
5:135392484:+,5:135394779:+	TGFBI	core	NM_000358	ENST00000305126,ENST00000398813,ENST00000442011,ENST00000504205,ENST00000506699,ENST00000507018,ENST00000509485,ENST00000514242,ENST00000514554	TGFBI.aAug10,TGFBI.bAug10,TGFBI.cAug10,TGFBI.dAug10,TGFBI.eAug10,TGFBI.gAug10,TGFBI.iAug10,TGFBI.jAug10	uc003lbf.3,uc003lbg.3,uc003lbh.3,uc010jed.2,uc011cyb.1	2.29582	2.45871	3.06603	25.114	5.06661e-22	3.49583e-20
13:96416002:+,13:96416087:+	DNAJC3	core	NM_006260	ENST00000376795	DNAJC3.aAug10,DNAJC3.bAug10	uc001vmq.2,uc001vmr.2	2.54568	2.72901	3.00731	25.1065	5.11136e-22	3.52209e-20
1:173833442:+,1:173834648:+	GAS5	extended	None	None	GAS5_.wxAug10	None	0.884677	4.34198	2.15303	25.0871	5.22812e-22	3.58844e-20
19:58899612:+,19:58904726:+	RPS5	extended	None	None	RPS5.jAug10	None	1.16418	3.05682	2.40594	25.0665	5.356e-22	3.66665e-20
10:121336262:+,10:121336592:+	TIAL1	core	NM_001033925,NM_003252	ENST00000369092,ENST00000369093,ENST00000436547,ENST00000497671	TIAL1.aAug10,TIAL1.bAug10,TIAL1.cAug10,TIAL1.dAug10,TIAL1.gAug10,TIAL1.hAug10,TIAL1.kAug10	uc001leh.1,uc001lei.1,uc001lej.1,uc001lek.1,uc009xzi.1	1.23165	2.1626	3.41893	25.0612	5.38922e-22	3.68221e-20
12:59308117:+,12:59313781:+	LRIG3	core	NM_153377	ENST00000320743,ENST00000433272,ENST00000548968	LRIG3.aAug10,LRIG3.eAug10,LRIG3.hAug10	uc001sqr.2,uc010ssh.1	2.08927	2.52738	3.2201	25.0136	5.69751e-22	3.85777e-20
11:128356041:+,11:128359185:+	ETS1	core	NM_001143820,NM_005238	ENST00000319397,ENST00000345075,ENST00000392668,ENST00000526145,ENST00000531611	ETS1.aAug10,ETS1.bAug10,ETS1.cAug10,ETS1.dAug10,ETS1.eAug10	uc001qej.2,uc009zcg.2,uc010sbs.1	2.39711	2.22993	3.77647	25.0031	5.76841e-22	3.89379e-20
13:23939416:+,13:23942541:+	SACS	core	NM_014363	ENST00000382292,ENST00000382298,ENST00000402364,ENST00000455470	SACS.aAug10,SACS.bAug10,SACS.cAug10,SACS.hAug10	uc001uon.2,uc001uoo.2,uc001uoq.1	1.71211	2.97223	3.055	25.0012	5.78072e-22	3.89906e-20
11:128333522:+,11:128350086:+	ETS1	core	NM_001143820,NM_001162422,NM_005238	ENST00000319397,ENST00000392668,ENST00000535549	ETS1.aAug10,ETS1.bAug10,ETS1.cAug10,ETS1.fAug10	uc001qej.2,uc009zch.2,uc010sbs.1	2.39711	2.30078	3.41388	24.9953	5.82121e-22	3.91913e-20
7:45024025:+,7:45026124:+	C7orf40	extended	None	None	C7orf40andSNORA9.hAug10	None	1.44389	5.78707	1.73326	24.9774	5.94439e-22	3.98394e-20
7:121000181:+,7:121004184:+	FAM3C	novel	NONE	NONE	NONE	NONE	1.13459	10.8157	-1.12008	24.9675	6.014e-22	4.02468e-20
14:45578983:+,14:45579297:+	PRPF39	core	NM_017922	ENST00000355765,ENST00000355846,ENST00000424478,ENST00000477626,ENST00000554439	PRPF39.aAug10,PRPF39.bAug10,PRPF39.cAug10	uc001wvy.3,uc001wvz.3,uc010and.2	2.37791	3.38135	2.47347	24.9503	6.13657e-22	4.09446e-20
2:70451761:+,2:70454867:+	TIA1	core	NM_022037,NM_022173	ENST00000282574,ENST00000361692,ENST00000415783,ENST00000416149,ENST00000433529,ENST00000445587,ENST00000454815,ENST00000477044,ENST00000477415,ENST00000477807	TIA1andC2orf42.bAug10,TIA1andC2orf42.cAug10,TIA1andC2orf42.dAug10,TIA1andC2orf42.fAug10,TIA1andC2orf42.gAug10,TIA1andC2orf42.iAug10,TIA1andC2orf42.jAug10,TIA1andC2orf42.kAug10,TIA1andC2orf42.viAug10,TIA1andC2orf42.vrAug10	uc002sgj.3,uc002sgk.3,uc002sgl.3,uc002sgm.3	-0.00956002	2.00438	3.87704	24.9448	6.17646e-22	4.11846e-20
15:60656722:+,15:60690142:+	ANXA2	extended	None	ENST00000560466	ANXA2.vbAug10	None	0.412886	5.59044	1.68602	24.8565	6.85228e-22	4.50346e-20
12:12974330:+,12:12974899:+	DDX47	novel	NONE	NONE	NONE	NONE	1.69437	10.6606	-1.19754	24.8554	6.86088e-22	4.5063e-20
5:126862470:+,5:126865986:+	PRRC1	core	NM_130809	ENST00000296666,ENST00000330542,ENST00000414018,ENST00000442138,ENST00000512535,ENST00000512635	PRRC1.aAug10,PRRC1.bAug10,PRRC1.cAug10	uc003kuj.3,uc003kuk.2	1.59029	2.18552	3.34227	24.8443	6.95143e-22	4.55619e-20
7:43663219:+,7:43663308:+	STK17A	core	NM_004760	ENST00000319357	STK17A.aAug10	uc003tih.2	2.24179	2.28933	3.44179	24.844	6.95417e-22	4.55619e-20
10:98282087:+,10:98287170:+	TM9SF3	novel	NONE	NONE	NONE	NONE	1.2283	10.5259	-1.26466	24.8313	7.05856e-22	4.6131e-20
1:150307712:+,1:150310636:+	PRPF3	core	NM_004698	ENST00000324862,ENST00000414970,ENST00000467329,ENST00000543398	PRPF3.aAug10,PRPF3.bAug10,PRPF3.cAug10,PRPF3.dAug10,PRPF3.eAug10,PRPF3.fAug10,PRPF3.hAug10	uc001eum.3,uc009wlp.2,uc009wlq.1,uc010pca.1,uc010pcb.1	2.44204	2.57058	2.8711	24.8229	7.12925e-22	4.65063e-20
8:57878911:+,8:57890609:+	IMPAD1	core	NM_017813	ENST00000262644	IMPAD1.aAug10	uc003xte.3	2.1695	2.22695	3.72935	24.8206	7.14877e-22	4.66047e-20
8:12958279:+,8:12960299:+	DLC1	core	NM_001164271,NM_006094,NM_182643	ENST00000276297,ENST00000358919,ENST00000503161,ENST00000512044,ENST00000520226	DLC1.aAug10,DLC1.bAug10,DLC1.cAug10,DLC1.dAug10,DLC1.rAug10	uc003wwk.1,uc003wwl.1,uc003wwm.2,uc011kxx.1	2.66829	2.66147	3.40215	24.7515	7.75595e-22	5.02828e-20
5:126866088:+,5:126869315:+	PRRC1	core	NM_130809	ENST00000296666,ENST00000330542,ENST00000414018,ENST00000442138,ENST00000512535,ENST00000512635	PRRC1.aAug10,PRRC1.bAug10,PRRC1.cAug10	uc003kuj.3,uc003kuk.2	1.59029	2.28733	3.22376	24.7289	7.96597e-22	5.15491e-20
X:152772381:+,X:152772505:+	BGN	core	NM_001711	ENST00000331595,ENST00000370204,ENST00000430380,ENST00000472615,ENST00000480756	BGN.aAug10,BGN.bAug10,BGN.dAug10	uc004fhq.1,uc004fhr.1	2.06987	2.07307	4.03409	24.7271	7.98313e-22	5.16162e-20
X:152772097:+,X:152772288:+	BGN	core	NM_001711	ENST00000331595,ENST00000370204,ENST00000430380,ENST00000472615,ENST00000480756	BGN.aAug10,BGN.bAug10,BGN.dAug10,BGN.kAug10	uc004fhq.1,uc004fhr.1	2.06987	2.03514	4.03949	24.7137	8.11122e-22	5.2264e-20
2:220284877:+,2:220285217:+	DES	novel	NONE	NONE	NONE	NONE	-0.367525	3.33399	2.38774	24.6862	8.37982e-22	5.38627e-20
17:65343366:+,17:65343452:+	PSMD12	core	NM_002816,NM_174871	ENST00000356126,ENST00000357146	PSMD12.aAug10,PSMD12.bAug10,PSMD12.cAug10,PSMD12.dAug10,PSMD12.eAug10	uc002jfy.2,uc002jfz.2,uc002jga.2,uc010det.1	2.49913	2.1177	3.65392	24.6467	8.78145e-22	5.62039e-20
5:126859274:+,5:126862310:+	PRRC1	novel	NONE	NONE	NONE	NONE	1.59029	10.6434	-1.20626	24.6244	9.01732e-22	5.75978e-20
4:99806212:+,4:99808230:+	EIF4E	core	NM_001130678,NM_001968	ENST00000280892,ENST00000450253,ENST00000504432,ENST00000505194,ENST00000515638	EIF4E.1.bAug10,EIF4E.1.cAug10,EIF4E.1.dAug10,EIF4E.1.eAug10,EIF4E.1.fAug10,EIF4E.1.gAug10,EIF4E.1.mAug10,EIF4E.1.nAug10	uc003hue.2,uc011cea.1	1.83402	2.04966	3.55891	24.6132	9.1379e-22	5.82374e-20
7:99669835:+,7:99672758:+	ZNF3	core	NM_032924	ENST00000299667,ENST00000303915,ENST00000412947,ENST00000415068,ENST00000424697,ENST00000428683,ENST00000441298,ENST00000449785,ENST00000487620	ZNF3.aAug10,ZNF3.bAug10,ZNF3.cAug10,ZNF3.dAug10,ZNF3.eAug10,ZNF3.fAug10,ZNF3.gAug10,ZNF3.hAug10,ZNF3.nAug10,ZNF3.oAug10	uc003usq.2,uc003usr.2,uc003uss.2,uc003ust.3,uc010lgj.2	1.35276	2.46573	2.90921	24.5993	9.29023e-22	5.90294e-20
3:170108252:+,3:170108824:+	SKIL	core	NM_001145097,NM_001145098,NM_001248008,NM_005414	ENST00000259119,ENST00000413427,ENST00000426052,ENST00000458537,ENST00000470571	SKIL.aAug10,SKIL.bAug10,SKIL.cAug10,SKIL.dAug10,SKIL.fAug10	uc003fgu.2,uc003fgv.2,uc003fgw.2,uc011bps.1	2.89546	2.82202	2.56634	24.5907	9.38595e-22	5.95657e-20
12:58143287:+,12:58145958:+	CDK4	extended	None	ENST00000549606	CDK4.oAug10	None	-0.0142289	7.3815	1.61946	24.5878	9.41823e-22	5.96985e-20
14:73563808:+,14:73566088:+	RBM25	core	NM_021239	ENST00000261973,ENST00000525321,ENST00000526754,ENST00000527432,ENST00000528081,ENST00000532192,ENST00000532683,ENST00000540173	RBM25.aAug10,RBM25.bAug10,RBM25.cAug10,RBM25.dAug10,RBM25.eAug10,RBM25.fAug10,RBM25.gAug10	uc001xnn.3,uc001xno.2,uc001xnp.2,uc010ttu.1	2.1353	2.0389	3.94474	24.5828	9.47411e-22	6.00165e-20
13:23942626:+,13:23945217:+	SACS	core	NM_014363	ENST00000382292,ENST00000382298	SACS.aAug10,SACS.hAug10	uc001uon.2	1.71211	2.8215	2.60483	24.5406	9.96251e-22	6.2808e-20
1:40726657:+,1:40733458:+	ZMPSTE24	core	NM_005857	ENST00000372759,ENST00000472583	ZMPSTE24.aAug10,ZMPSTE24.cAug10,ZMPSTE24.fAug10	uc001cfg.2	2.05043	2.31407	3.14001	24.5383	9.98962e-22	6.29412e-20
9:101908891:+,9:101909936:+	TGFBR1	core	NM_001130916,NM_004612	ENST00000374990,ENST00000374994,ENST00000540092,ENST00000546096,ENST00000550253,ENST00000552516	TGFBR1.aAug10,TGFBR1.bAug10,TGFBR1.cAug10	uc004azc.2,uc004azd.2,uc011lvc.1	2.17317	2.08009	3.47957	24.5357	1.00212e-21	6.31024e-20
13:79943125:+,13:79945080:+	RBM26	core	NM_022118	ENST00000267229,ENST00000327303,ENST00000438724,ENST00000438737	RBM26.aAug10,RBM26.bAug10,RBM26.cAug10,RBM26.dAug10,RBM26.eAug10,RBM26.hAug10	uc001vky.2,uc001vkz.2,uc001vla.2,uc001vlb.1	2.32617	2.39415	3.15838	24.5227	1.01776e-21	6.39724e-20
9:114694639:+,9:114695107:+	UGCG	core	NM_003358	ENST00000374279	UGCG.aAug10,UGCG.bAug10	uc004bft.2	1.87524	2.04013	3.94944	24.5172	1.02437e-21	6.43496e-20
1:24987887:+,1:24989151:+	SRRM1	core	NM_005839	ENST00000323848,ENST00000374389,ENST00000447431,ENST00000461768,ENST00000479034,ENST00000485541,ENST00000496882,ENST00000537199	SRRM1.aAug10,SRRM1.bAug10,SRRM1.cAug10,SRRM1.dAug10,SRRM1.eAug10,SRRM1.gAug10,SRRM1.lAug10,SRRM1.nAug10,SRRM1.pAug10	uc001bjm.2,uc009vrh.1,uc009vri.1,uc010oel.1,uc010oem.1	2.73355	2.48967	3.00624	24.5147	1.02752e-21	6.45086e-20
18:32920697:+,18:32924334:+	ZNF24	extended	None	ENST00000399061	ZNF24.aAug10,ZNF24.cAug10	uc002kyt.2	2.68492	2.91648	2.56691	24.5044	1.04015e-21	6.51848e-20
15:78834272:+,15:78837211:+	PSMA4	novel	NONE	NONE	NONE	NONE	0.157897	10.3816	-1.33657	24.4945	1.05258e-21	6.57679e-20
12:48064128:+,12:48073487:+	RPAP3	core	NM_001146075	ENST00000380650	RPAP3.bAug10	uc001rps.2	-0.0846295	3.03184	2.52936	24.4914	1.05651e-21	6.58785e-20
1:109235489:+,1:109238324:+	PRPF38B	core	NM_018061	ENST00000370022,ENST00000370025	PRPF38B.aAug10,PRPF38B.cAug10,PRPF38B.eAug10,PRPF38B.gAug10,PRPF38B.hAug10,PRPF38B.kAug10	uc001dvv.3,uc010ouz.1	2.4139	2.50328	3.12719	24.4911	1.05685e-21	6.58785e-20
5:158621832:+,5:158630442:+	RNF145	core	NM_001199380,NM_001199381,NM_001199382,NM_001199383,NM_144726	ENST00000274542,ENST00000413445,ENST00000424310,ENST00000518802,ENST00000519865,ENST00000520548,ENST00000520638,ENST00000521606,ENST00000535312	RNF145.aAug10,RNF145.bAug10,RNF145.cAug10,RNF145.dAug10,RNF145.eAug10,RNF145.fAug10	uc003lxo.1,uc003lxp.2,uc010jiq.1,uc011ddy.1,uc011ddz.1,uc011dea.1	1.63576	2.58768	2.99496	24.4798	1.0712e-21	6.66938e-20
14:45577725:+,14:45578819:+	PRPF39	core	NM_017922	ENST00000355765,ENST00000355846,ENST00000424478,ENST00000477626,ENST00000554081,ENST00000554429,ENST00000554439,ENST00000557477	PRPF39.aAug10,PRPF39.bAug10,PRPF39.cAug10,PRPF39.lAug10	uc001wvy.3,uc001wvz.3,uc010and.2	2.37791	2.34466	3.31753	24.4681	1.08624e-21	6.75503e-20
X:152770327:+,X:152770696:+	BGN	core	NM_001711	ENST00000331595,ENST00000370204,ENST00000430380,ENST00000431891,ENST00000472615	BGN.aAug10,BGN.bAug10,BGN.cAug10,BGN.eAug10,BGN.fAug10,BGN.gAug10,BGN.hAug10,BGN.jAug10	uc004fhq.1,uc004fhr.1	2.06987	2.02435	3.87528	24.4621	1.09412e-21	6.80002e-20
13:96377506:+,13:96409898:+	DNAJC3	core	NM_006260	ENST00000376795	DNAJC3.aAug10	uc001vmq.2	2.54568	2.7261	2.79391	24.4552	1.10318e-21	6.84825e-20
10:92677587:+,10:92678888:+	ANKRD1	novel	NONE	NONE	NONE	NONE	-0.354704	3.02199	2.45302	24.4519	1.10755e-21	6.87134e-20
X:152760571:+,X:152770079:+	BGN	core	NM_001711	ENST00000331595,ENST00000431891,ENST00000472615,ENST00000480756	BGN.aAug10,BGN.bAug10,BGN.hAug10,BGN.iAug10	uc004fhq.1,uc004fhr.1	2.06987	2.20907	3.5051	24.4451	1.11655e-21	6.92309e-20
10:5496485:+,10:5496911:+	NET1	core	NM_001047160,NM_005863	ENST00000355029,ENST00000380337,ENST00000380359,ENST00000484741,ENST00000542715	NET1.aAug10,NET1.bAug10,NET1.cAug10,NET1.dAug10,NET1.eAug10	uc001iia.2,uc001iib.2,uc010qar.1,uc010qas.1	1.52694	2.08867	3.65868	24.4435	1.11866e-21	6.93204e-20
7:92199229:+,7:92205085:+	FAM133B,LOC728066	core	NM_001040057,NM_152789,NR_034169	ENST00000415397,ENST00000427372,ENST00000438306,ENST00000445716,ENST00000468931,ENST00000481407,ENST00000490747,ENST00000494079	FAM133B.aAug10,FAM133B.bAug10,FAM133B.cAug10,FAM133B.dAug10,FAM133B.eAug10,FAM133B.fAug10,FAM133B.gAug10,FAM133B.hAug10,FAM133B.iAug10,FAM133B.jAug10,FAM133B.oAug10,FAM133B.pAug10	uc003umb.2,uc003umc.2,uc003umd.2	2.22675	2.32801	3.43399	24.439	1.12466e-21	6.96105e-20
17:48774482:+,17:48776760:+	ANKRD40	core	NM_052855	ENST00000285243	ANKRD40.aAug10,ANKRD40.bAug10	uc002iso.2	1.91606	2.0513	3.53781	24.3915	1.19059e-21	7.32174e-20
5:95236784:+,5:95242227:+	ELL2	core	NM_012081	ENST00000237853	ELL2.aAug10,ELL2.cAug10,ELL2.dAug10	uc003klr.3	1.76837	2.49037	3.04149	24.3239	1.29112e-21	7.88466e-20
2:88890570:+,2:88892790:+	EIF2AK3	core	NM_004836	ENST00000303236,ENST00000415570,ENST00000419748,ENST00000477083,ENST00000535951	EIF2AK3.aAug10,EIF2AK3.bAug10,EIF2AK3.cAug10,EIF2AK3.gAug10	uc002stc.3	2.82567	3.12863	2.29006	24.3227	1.29302e-21	7.89169e-20
5:138629494:+,5:138650364:+	MATR3	extended	None	ENST00000509918,ENST00000511978,ENST00000513121,ENST00000513678	SNHG4andMATR3.lAug10,SNHG4andMATR3.pAug10,SNHG4andMATR3.tAug10,SNHG4andMATR3.vjAug10,SNHG4andMATR3.vtAug10	None	0.973175	3.97278	1.94428	24.321	1.29561e-21	7.9029e-20
12:4383401:+,12:4385171:+	CCND2	core	NM_001759	ENST00000261254	CCND2.aAug10,CCND2.bAug10	uc001qmo.2	0.883639	2.14975	3.40929	24.2672	1.38216e-21	8.37262e-20
21:34918685:+,21:34921782:+	SON	core	NM_032195,NM_138927	ENST00000290239,ENST00000300278,ENST00000356577,ENST00000381679,ENST00000455528	SON.aAug10,SON.bAug10,SON.cAug10,SON.dAug10,SON.tAug10	uc002ysb.1,uc002ysc.2,uc002ysd.2,uc002yse.1	2.34302	2.55457	3.15986	24.2611	1.39232e-21	8.42444e-20
7:17370510:+,7:17373536:+	AHR	core	NM_001621	ENST00000242057,ENST00000463496,ENST00000475440	AHR.aAug10,AHR.bAug10,AHR.fAug10	uc003stt.3,uc011jxz.1	2.56517	2.8192	2.72393	24.2544	1.40368e-21	8.46886e-20
5:158603875:+,5:158608968:+	RNF145	core	NM_001199380,NM_001199381,NM_001199382,NM_001199383,NM_144726	ENST00000274542,ENST00000413445,ENST00000424310,ENST00000518802,ENST00000519865,ENST00000520638,ENST00000521606,ENST00000535312	RNF145.aAug10,RNF145.bAug10,RNF145.cAug10,RNF145.dAug10,RNF145.eAug10,RNF145.fAug10	uc003lxo.1,uc003lxp.2,uc010jiq.1,uc011ddy.1,uc011ddz.1,uc011dea.1	1.63576	2.20533	3.28865	24.2527	1.40649e-21	8.48093e-20
17:7477626:+,17:7478437:+	EIF4A1	novel	NONE	NONE	NONE	NONE	0.994963	5.95877	1.61407	24.2477	1.41502e-21	8.52743e-20
7:17373738:+,7:17374511:+	AHR	core	NM_001621	ENST00000242057,ENST00000463496	AHR.aAug10,AHR.bAug10	uc003stt.3,uc011jxz.1	2.56517	2.53271	2.88705	24.2455	1.41884e-21	8.53586e-20
12:69864310:+,12:69955960:+	FRS2	extended	None	ENST00000550389	FRS2.bAug10	uc009zrk.2	1.09463	4.43532	1.7786	24.2422	1.42448e-21	8.56486e-20
12:69004823:+,12:69047892:+	RAP1B	extended	None	ENST00000378985,ENST00000543393	RAP1B.nAug10,RAP1B.oAug10	uc010ste.1	2.15265	5.15906	1.89935	24.2082	1.48402e-21	8.88732e-20
10:116621093:+,10:116621194:+	FAM160B1	core	NM_020940	ENST00000369248	FAM160B1andRPL15P13.aAug10	uc001lcb.2	3.41984	3.28083	2.13806	24.1755	1.54375e-21	9.224e-20
1:16460101:+,1:16460355:+	EPHA2	core	NM_004431	ENST00000358432	EPHA2.aAug10	uc001aya.1	1.80946	2.33694	3.41301	24.1476	1.59682e-21	9.52489e-20
10:13647744:+,10:13652039:+	PRPF18	core	NM_003675	ENST00000320054,ENST00000378544,ENST00000378572,ENST00000417658	PRPF18.aAug10,PRPF18.bAug10,PRPF18.cAug10,PRPF18.dAug10	uc001imp.2	2.0355	2.5596	2.73032	24.1345	1.62227e-21	9.66574e-20
6:4042802:+,6:4044047:+	PRPF4B	core	NM_003913	ENST00000337659,ENST00000463634,ENST00000480058,ENST00000481109,ENST00000490399,ENST00000538861	PRPF4B.aAug10,PRPF4B.bAug10,PRPF4B.cAug10,PRPF4B.dAug10,PRPF4B.eAug10	uc003mvv.2,uc003mvw.2,uc011dhv.1	2.54211	2.51474	2.80565	24.11	1.67108e-21	9.92843e-20
10:124221640:+,10:124248418:+	HTRA1	core	NM_002775	ENST00000368984,ENST00000435263	HTRA1.aAug10	uc001lgj.2	1.95834	2.01796	3.57573	24.1072	1.67671e-21	9.9493e-20
12:81111343:+,12:81112640:+	MYF5	novel	NONE	NONE	NONE	NONE	-0.219087	5.84755	1.80682	24.1069	1.67743e-21	9.9493e-20
5:135496796:+,5:135498961:+	SMAD5	core	NM_001001419,NM_001001420,NM_005903	ENST00000507637,ENST00000514641,ENST00000545279,ENST00000545620	SMAD5.aAug10,SMAD5.bAug10,SMAD5.cAug10,SMAD5.dAug10	uc003lbj.1,uc003lbk.1,uc003lbl.1	2.12046	2.38566	2.96223	24.0896	1.7129e-21	1.01368e-19
1:203797550:+,1:203798579:+	ZC3H11A	core	NM_014827	ENST00000332127,ENST00000367210,ENST00000367212,ENST00000367214,ENST00000453771,ENST00000495527,ENST00000537080,ENST00000545588	ZC3H11A.bAug10,ZC3H11A.cAug10,ZC3H11A.dAug10,ZC3H11A.eAug10,ZC3H11A.gAug10,ZC3H11A.lAug10,ZC3H11A.mAug10	uc001hac.2,uc001had.2,uc001hae.2,uc001haf.2,uc001hag.1,uc010pqm.1	1.71202	2.04185	3.58431	24.0693	1.75554e-21	1.03309e-19
2:197006021:+,2:197008284:+	STK17B	core	NM_004226	ENST00000263955,ENST00000409228	STK17B.aAug10,STK17B.bAug10	uc002utk.2,uc010fsh.2	2.49976	2.50171	3.03341	24.0583	1.77904e-21	1.04342e-19
5:96514897:+,5:96518830:+	RIOK2	core	NM_001159749,NM_018343	ENST00000283109,ENST00000508447,ENST00000508991,ENST00000511920	RIOK2.aAug10,RIOK2.bAug10,RIOK2.dAug10,RIOK2.fAug10	uc003kmz.2,uc003kna.3	1.9345	2.30466	3.08879	24.0579	1.78e-21	1.04342e-19
2:88876221:+,2:88879036:+	EIF2AK3	core	NM_004836	ENST00000303236,ENST00000415570,ENST00000419748,ENST00000478003,ENST00000535951	EIF2AK3.aAug10,EIF2AK3.bAug10,EIF2AK3.cAug10,EIF2AK3.eAug10	uc002stc.3	2.82567	2.90476	2.50318	24.048	1.80157e-21	1.05254e-19
X:152772643:+,X:152773706:+	BGN	core	NM_001711	ENST00000331595,ENST00000370204,ENST00000430380,ENST00000472615,ENST00000480756	BGN.aAug10,BGN.bAug10	uc004fhq.1,uc004fhr.1	2.06987	2.09514	3.75628	24.0257	1.85085e-21	1.08014e-19
12:88899012:+,12:88900088:+	KITLG	core	NM_000899,NM_003994	ENST00000228280,ENST00000347404,ENST00000357116,ENST00000378535	KITLG.aAug10,KITLG.bAug10,KITLG.cAug10,KITLG.gAug10	uc001tav.2,uc001taw.2	3.45509	3.22567	2.43792	24.0219	1.85946e-21	1.08336e-19
10:121616951:+,10:121618553:+	C10orf119	novel	NONE	NONE	NONE	NONE	0.503083	10.2968	-1.3794	24.02	1.86387e-21	1.08473e-19
4:166261527:+,4:166262903:+	SC4MOL	core	NM_001017369,NM_006745	ENST00000261507,ENST00000393766	SC4MOL.aAug10,SC4MOL.bAug10,SC4MOL.cAug10,SC4MOL.gAug10,SC4MOL.hAug10,SC4MOL.iAug10	uc003ire.2,uc003irf.2	2.73603	2.37798	2.89699	23.9967	1.91741e-21	1.11465e-19
4:166259089:+,4:166259804:+	SC4MOL	core	NM_001017369,NM_006745	ENST00000261507,ENST00000393766,ENST00000504317,ENST00000507013	SC4MOL.aAug10,SC4MOL.bAug10,SC4MOL.cAug10,SC4MOL.dAug10,SC4MOL.eAug10,SC4MOL.fAug10,SC4MOL.gAug10	uc003ire.2,uc003irf.2,uc010irb.2	2.73603	2.6877	2.67463	23.9881	1.93749e-21	1.12508e-19
1:150305238:+,1:150305450:+	PRPF3	core	NM_004698	ENST00000324862,ENST00000414970,ENST00000467329,ENST00000467514,ENST00000496202,ENST00000543398	PRPF3.aAug10,PRPF3.bAug10,PRPF3.cAug10,PRPF3.dAug10,PRPF3.eAug10,PRPF3.fAug10,PRPF3.iAug10	uc001eum.3,uc009wlp.2,uc010pca.1,uc010pcb.1	2.44204	2.6406	2.66709	23.987	1.94017e-21	1.12511e-19
11:118650445:+,11:118651830:+	DDX6	core	NM_004397	ENST00000264018,ENST00000526070,ENST00000534980,ENST00000545741	DDX6.aAug10,DDX6.bAug10,DDX6.cAug10,DDX6.eAug10,DDX6.iAug10	uc001pub.2,uc001puc.2	1.93343	2.05893	3.64011	23.9801	1.95637e-21	1.13292e-19
14:45571899:+,14:45576654:+	PRPF39	core	NM_017922	ENST00000355765,ENST00000355846,ENST00000424478,ENST00000477626,ENST00000554081,ENST00000554429,ENST00000554439	PRPF39.aAug10,PRPF39.bAug10,PRPF39.cAug10	uc001wvy.3,uc001wvz.3,uc010and.2	2.37791	2.44891	2.89474	23.961	2.00256e-21	1.15648e-19
11:118622806:+,11:118625414:+	DDX6	core	NM_004397	ENST00000264018,ENST00000529162,ENST00000534980	DDX6.aAug10,DDX6.bAug10,DDX6.dAug10	uc001pua.2,uc001pub.2,uc001puc.2	1.93343	2.0712	3.72321	23.9602	2.00453e-21	1.15699e-19
1:24998086:+,1:24998673:+	SRRM1	core	NM_005839	ENST00000323848,ENST00000374389,ENST00000447431	SRRM1.aAug10,SRRM1.bAug10	uc001bjm.2,uc010oel.1	2.73355	2.54103	3.16271	23.9288	2.08273e-21	1.19949e-19
19:9415800:+,19:9420026:+	ZNF699	extended	None	None	ZNF699.cAug10	None	2.75309	3.24639	2.32164	23.9245	2.09364e-21	1.20445e-19
6:4049340:+,6:4049966:+	PRPF4B	core	NM_003913	ENST00000337659,ENST00000463634,ENST00000480058,ENST00000481109,ENST00000538861	PRPF4B.aAug10,PRPF4B.bAug10,PRPF4B.cAug10,PRPF4B.dAug10	uc003mvv.2,uc003mvw.2,uc011dhv.1	2.54211	2.64346	3.06721	23.9059	2.14162e-21	1.23004e-19
13:79908565:+,13:79911237:+	RBM26	core	NM_022118	ENST00000267229,ENST00000327303,ENST00000438724,ENST00000438737,ENST00000449987,ENST00000484573	RBM26.aAug10,RBM26.bAug10,RBM26.cAug10,RBM26.dAug10,RBM26.gAug10,RBM26.jAug10,RBM26.kAug10	uc001vkx.2,uc001vky.2,uc001vkz.2,uc001vla.2,uc010tia.1	2.32617	2.2445	3.14513	23.8946	2.17124e-21	1.24569e-19
1:150312953:+,1:150315785:+	PRPF3	core	NM_004698	ENST00000324862,ENST00000414970,ENST00000467329,ENST00000543398	PRPF3.aAug10,PRPF3.bAug10,PRPF3.cAug10,PRPF3.eAug10,PRPF3.fAug10	uc001eum.3,uc009wlp.2,uc010pca.1,uc010pcb.1	2.44204	2.52172	3.04896	23.8862	2.19372e-21	1.25722e-19
6:4032989:+,6:4037631:+	PRPF4B	core	NM_003913	ENST00000337659,ENST00000480058,ENST00000489943,ENST00000538861	PRPF4B.aAug10,PRPF4B.bAug10,PRPF4B.cAug10	uc003mvv.2,uc011dhv.1	2.54211	2.67021	2.85489	23.8536	2.28278e-21	1.29836e-19
8:57892756:+,8:57905758:+	IMPAD1	core	NM_017813	ENST00000262644,ENST00000517461	IMPAD1.aAug10,IMPAD1.cAug10	uc003xte.3	2.1695	2.23582	3.28937	23.8424	2.31444e-21	1.31353e-19
1:24987290:+,1:24987801:+	SRRM1	core	NM_005839	ENST00000323848,ENST00000374389,ENST00000447431,ENST00000479034,ENST00000485541,ENST00000496882,ENST00000537199	SRRM1.aAug10,SRRM1.bAug10,SRRM1.cAug10,SRRM1.dAug10,SRRM1.eAug10,SRRM1.gAug10,SRRM1.lAug10,SRRM1.nAug10	uc001bjm.2,uc009vrh.1,uc009vri.1,uc010oel.1,uc010oem.1	2.73355	2.21695	3.13039	23.8418	2.31606e-21	1.31374e-19
3:194169365:+,3:194170874:+	ATP13A3	core	NM_024524	ENST00000256031,ENST00000310773,ENST00000439040,ENST00000485194	ATP13A3.aAug10,ATP13A3.cAug10	uc003fty.3,uc003ftz.1	1.71466	2.03654	3.7813	23.8389	2.32438e-21	1.31704e-19
X:23802000:+,X:23803445:+	SAT1	core	NM_002970	ENST00000379270	SAT1.bAug10,SAT1.cAug10	uc004dau.2	3.21701	3.59835	2.06294	23.8206	2.37694e-21	1.34388e-19
2:10937333:+,2:10942625:+	PDIA6	novel	NONE	NONE	NONE	NONE	1.1975	10.5377	-1.25827	23.8202	2.37814e-21	1.34388e-19
4:100813191:+,4:100815492:+	MAPKSP1	core	NR_024170	ENST00000515100	MAPKSP1.cAug10	uc003hvi.2	0.943415	3.4535	2.31935	23.7999	2.43802e-21	1.37329e-19
8:12960362:+,8:12968251:+	DLC1	core	NM_001164271,NM_006094,NM_182643	ENST00000276297,ENST00000358919,ENST00000503161,ENST00000512044,ENST00000520226	DLC1.aAug10,DLC1.bAug10,DLC1.cAug10,DLC1.dAug10	uc003wwk.1,uc003wwl.1,uc003wwm.2,uc011kxx.1	2.66829	2.3999	3.1872	23.7969	2.44684e-21	1.37752e-19
20:48259121:+,20:48260063:+	B4GALT5	core	NM_004776	ENST00000371711	B4GALT5.aAug10,B4GALT5.bAug10	uc002xuu.3	2.18271	2.26168	3.31677	23.7771	2.50709e-21	1.40918e-19
12:88912644:+,12:88926218:+	KITLG	core	NM_000899,NM_003994	ENST00000228280,ENST00000347404,ENST00000378535,ENST00000552044	KITLG.aAug10,KITLG.bAug10,KITLG.cAug10,KITLG.hAug10	uc001tav.2,uc001taw.2	3.45509	3.28034	2.51116	23.7616	2.555e-21	1.43381e-19
6:117900227:+,6:117923167:+	GOPC	core	NM_001017408,NM_020399	ENST00000052569,ENST00000368498,ENST00000535237	GOPCandROS1.cAug10,GOPCandROS1.dAug10,GOPCandROS1.fAug10	uc003pxu.2,uc003pxv.2	1.67233	2.03268	3.42447	23.748	2.5982e-21	1.45457e-19
3:186502302:+,3:186503672:+	EIF4A2	extended	None	None	EIF4A2_.jAug10,EIF4A2_.tAug10	None	0.725695	5.63741	1.56754	23.7478	2.59891e-21	1.45457e-19
20:3103230:+,20:3103958:+	UBOX5	core	NM_014948,NM_199415	ENST00000217173,ENST00000348031,ENST00000449731	UBOX5andFASTKD5.cAug10,UBOX5andFASTKD5.dAug10,UBOX5andFASTKD5.eAug10	uc002whw.2,uc002whx.2,uc002why.1	3.23412	3.06995	2.20527	23.7424	2.61596e-21	1.46179e-19
5:135391505:+,5:135392354:+	TGFBI	core	NM_000358	ENST00000305126,ENST00000398813,ENST00000442011,ENST00000504205,ENST00000506699,ENST00000507018,ENST00000514242,ENST00000514554	TGFBI.aAug10,TGFBI.bAug10,TGFBI.cAug10,TGFBI.dAug10,TGFBI.eAug10,TGFBI.gAug10,TGFBI.iAug10,TGFBI.jAug10	uc003lbf.3,uc003lbg.3,uc003lbh.3,uc010jed.2,uc011cyb.1	2.29582	2.67838	2.54527	23.7245	2.67427e-21	1.49278e-19
6:41059433:+,6:41060651:+	NFYA	core	NM_002505,NM_021705	ENST00000341376,ENST00000353205	NFYA.bAug10,NFYA.cAug10,NFYA.dAug10,NFYA.mAug10	uc003opo.2,uc003opp.2,uc003opq.2	2.62712	2.5644	2.67047	23.7107	2.71998e-21	1.51508e-19
1:150305670:+,1:150307406:+	PRPF3	core	NM_004698	ENST00000324862,ENST00000414970,ENST00000467329,ENST00000467514,ENST00000496202,ENST00000543398	PRPF3.aAug10,PRPF3.bAug10,PRPF3.cAug10,PRPF3.dAug10,PRPF3.eAug10,PRPF3.fAug10,PRPF3.iAug10	uc001eum.3,uc009wlp.2,uc009wlq.1,uc010pca.1,uc010pcb.1	2.44204	2.68549	2.6709	23.7001	2.75569e-21	1.53416e-19
13:96361591:+,13:96375496:+	DNAJC3	core	NM_006260	ENST00000376795	DNAJC3.aAug10,DNAJC3.bAug10,DNAJC3.cAug10,DNAJC3.gAug10	uc001vmp.2,uc001vmq.2,uc001vmr.2	2.54568	2.63146	2.9378	23.6856	2.80534e-21	1.55851e-19
2:88879158:+,2:88882948:+	EIF2AK3	core	NM_004836	ENST00000303236,ENST00000415570,ENST00000419748,ENST00000535951	EIF2AK3.aAug10,EIF2AK3.bAug10,EIF2AK3.cAug10	uc002stc.3	2.82567	2.98381	2.35102	23.6658	2.87441e-21	1.5922e-19
7:6439819:+,7:6441947:+	RAC1	novel	NONE	NONE	NONE	NONE	0.677631	7.01699	2.04966	23.6425	2.95809e-21	1.63045e-19	Figure 5C
7:103003886:+,7:103006523:+	PSMC2,SLC26A5	novel	NONE	NONE	NONE	NONE	0.527155	10.0368	-1.50921	23.628	3.01156e-21	1.65472e-19
3:178748787:+,3:178785271:+	ZMAT3	core	NM_022470,NM_152240	ENST00000311417,ENST00000414084,ENST00000432729	ZMAT3.aAug10,ZMAT3.bAug10,ZMAT3.cAug10	uc003fjg.2,uc003fji.2,uc010hxa.2	3.48829	3.48213	2.33954	23.618	3.04877e-21	1.6731e-19
20:48257202:+,20:48259005:+	B4GALT5	core	NM_004776	ENST00000371711	B4GALT5.aAug10	uc002xuu.3	2.18271	2.25096	3.48409	23.6171	3.05209e-21	1.6731e-19
2:197004523:+,2:197005973:+	STK17B	core	NM_004226	ENST00000263955,ENST00000409228	STK17B.aAug10,STK17B.bAug10	uc002utk.2,uc010fsh.2	2.49976	2.54758	3.01585	23.5832	3.18269e-21	1.73967e-19
12:69991055:+,12:69991748:+	CCT2	novel	NONE	NONE	NONE	NONE	-1.03564	4.41251	1.88931	23.564	3.25925e-21	1.77561e-19
12:69982042:+,12:69985839:+	CCT2	novel	NONE	NONE	NONE	NONE	-1.03564	4.35546	1.69058	23.5379	3.36583e-21	1.82367e-19
5:55252063:+,5:55253037:+	IL6ST	core	NM_001190981,NM_002184	ENST00000336909,ENST00000381294,ENST00000381298,ENST00000502326,ENST00000503773,ENST00000506241	IL6ST.aAug10,IL6ST.bAug10,IL6ST.cAug10,IL6ST.fAug10	uc003jqq.2,uc010iwb.2,uc011cqk.1	1.90077	2.17313	3.81923	23.4967	3.54197e-21	1.91186e-19
3:48726206:+,3:48726971:+	IP6K2	core	NM_001005909,NM_016291	ENST00000328631	IP6K2.aAug10,IP6K2.bAug10,IP6K2.cAug10,IP6K2.dAug10	uc003cup.2,uc003cuq.2	0.338302	2.53745	2.62439	23.4867	3.58644e-21	1.92929e-19
2:88883060:+,2:88885359:+	EIF2AK3	core	NM_004836	ENST00000303236,ENST00000415570,ENST00000419748,ENST00000535951	EIF2AK3.aAug10,EIF2AK3.bAug10,EIF2AK3.cAug10	uc002stc.3	2.82567	2.84717	2.41311	23.4699	3.662e-21	1.96491e-19
4:138449971:+,4:138450756:+	PCDH18	extended	None	ENST00000412923,ENST00000507846	PCDH18.bAug10,PCDH18.cAug10	uc003ihf.3,uc003ihg.3	2.60728	2.69867	2.90075	23.4677	3.67191e-21	1.96822e-19
20:476446:+,20:480477:+	CSNK2A1	novel	NONE	NONE	NONE	NONE	1.86031	10.3144	-1.37079	23.4633	3.69199e-21	1.97697e-19
3:194157944:+,3:194158040:+	ATP13A3	core	NM_024524	ENST00000256031,ENST00000310773,ENST00000439040	ATP13A3.aAug10	uc003fty.3,uc003ftz.1	1.71466	2.08014	3.67971	23.4623	3.6964e-21	1.97833e-19
1:24993416:+,1:24995614:+	SRRM1	core	NM_005839	ENST00000323848,ENST00000374389,ENST00000447431,ENST00000479034,ENST00000489130	SRRM1.aAug10,SRRM1.bAug10,SRRM1.cAug10,SRRM1.dAug10,SRRM1.lAug10,SRRM1.oAug10,SRRM1.pAug10	uc001bjm.2,uc009vrh.1,uc009vri.1,uc010oel.1	2.73355	2.45111	2.79609	23.4557	3.727e-21	1.99167e-19
4:138442850:+,4:138449632:+	PCDH18	core	NM_019035	ENST00000344876,ENST00000412923,ENST00000507846,ENST00000510305,ENST00000511115	PCDH18.aAug10,PCDH18.bAug10,PCDH18.cAug10,PCDH18.dAug10,PCDH18.eAug10,PCDH18.fAug10,PCDH18.gAug10	uc003ihe.3,uc003ihf.3,uc003ihg.3,uc011cgz.1,uc011cha.1	2.60728	2.54941	2.77766	23.4547	3.73141e-21	1.99301e-19
9:70484471:+,9:70486793:+	CBWD3,CBWD5	core	NM_001024916,NM_201453	ENST00000377380,ENST00000377384,ENST00000377389,ENST00000377392,ENST00000377395,ENST00000382404,ENST00000382405,ENST00000429800,ENST00000430059,ENST00000441808,ENST00000465474,ENST00000469921,ENST00000476161,ENST00000480229,ENST00000486221,ENST00000497250	CBWD5.bAug10,CBWD5.cAug10,CBWD5.dAug10,CBWD5.eAug10,CBWD5.fAug10,CBWD5.gAug10,CBWD5.iAug10,CBWD5.jAug10,CBWD5.mAug10,CBWD5.nAug10,CBWD5.oAug10,CBWD5.pAug10,CBWD5.rAug10,CBWD5.tAug10,CBWD5.uAug10,CBWD5.veAug10	uc004afy.3,uc004aga.3,uc004agb.3,uc004agc.3,uc004agd.1,uc004age.2,uc010moe.1,uc011lrm.1,uc011lrn.1	1.2025	2.72352	2.4872	23.4388	3.80588e-21	2.02969e-19
12:4440483:+,12:4446205:+	C12orf5	core	NM_020375	ENST00000179259	C12orf5.aAug10,C12orf5.bAug10	uc001qmp.2	1.90122	2.02621	3.33254	23.425	3.87186e-21	2.06383e-19
3:195389604:+,3:195390957:+	SDHAP2	extended	None	ENST00000425425,ENST00000429897,ENST00000453324,ENST00000539717	SDHAP2andMUC20.fAug10,SDHAP2andMUC20.kAug10,SDHAP2andMUC20.mAug10,SDHAP2andMUC20.nAug10,SDHAP2andMUC20.voAug10,SDHAP2andMUC20.vqAug10,SDHAP2andMUC20.vwAug10,SDHAP2andMUC20.vxAug10,SDHAP2andMUC20.waAug10	uc003fuu.3,uc003fuw.2,uc011btb.1	2.01632	3.5399	2.00888	23.4109	3.94031e-21	2.09607e-19
13:98668035:+,13:98670739:+	IPO5	novel	NONE	NONE	NONE	NONE	1.02004	10.0933	-1.48137	23.3912	4.03774e-21	2.13817e-19
13:31715396:+,13:31719700:+	HSPH1	extended	None	ENST00000380363,ENST00000380405	HSPH1.bAug10	uc001utk.2	0.618709	5.17769	1.62898	23.3597	4.1993e-21	2.21703e-19
14:52118935:+,14:52156409:+	FRMD6	extended	None	ENST00000554778	FRMD6.kAug10,FRMD6.lAug10	None	2.63454	4.20184	1.8671	23.3549	4.22447e-21	2.2292e-19
2:187506315:+,2:187511413:+	ITGAV	core	NM_001144999,NM_001145000,NM_002210	ENST00000261023,ENST00000374907,ENST00000433736,ENST00000544640	ITGAV.aAug10,ITGAV.bAug10	uc002upq.2,uc010frs.2,uc010zfv.1	2.28123	2.34479	3.09428	23.34	4.30366e-21	2.26758e-19
19:39924058:+,19:39924305:+	RPS16	novel	NONE	NONE	NONE	NONE	1.06702	5.77834	1.56423	23.3384	4.31264e-21	2.27117e-19
10:116608496:+,10:116614956:+	FAM160B1	core	NM_001135051,NM_020940	ENST00000369248,ENST00000369250	FAM160B1andRPL15P13.aAug10,FAM160B1andRPL15P13.bAug10	uc001lcb.2,uc001lcc.2	3.41984	3.35545	2.34132	23.3356	4.32763e-21	2.27565e-19
2:55200334:+,2:55209651:+	RTN4	novel	NONE	NONE	NONE	NONE	-0.510336	10.2844	-1.38602	23.3331	4.34105e-21	2.28043e-19
12:69203072:+,12:69214105:+	MDM2	extended	None	ENST00000478070	MDM2.vaAug10	uc009zrf.2	2.96722	7.55595	1.64419	23.3078	4.48008e-21	2.34877e-19
11:118651893:+,11:118656761:+	DDX6	core	NM_004397	ENST00000264018,ENST00000526070,ENST00000531971,ENST00000534980,ENST00000545741	DDX6.aAug10,DDX6.bAug10,DDX6.cAug10,DDX6.eAug10	uc001pub.2,uc001puc.2	1.93343	2.04144	3.34081	23.2887	4.58858e-21	2.40289e-19
7:44838876:+,7:44840886:+	PPIA	novel	NONE	NONE	NONE	NONE	0.796549	8.38602	2.12853	23.2841	4.61467e-21	2.41332e-19
14:45564766:+,14:45565306:+	PRPF39	core	NM_017922	ENST00000355765,ENST00000424478,ENST00000477626,ENST00000554429,ENST00000554439,ENST00000556353	PRPF39.aAug10,PRPF39.bAug10,PRPF39.cAug10,PRPF39.hAug10	uc001wvy.3,uc001wvz.3,uc010and.2	2.37791	2.81413	2.74912	23.28	4.63848e-21	2.42216e-19
19:13050049:+,19:13050867:+	CALR	novel	NONE	NONE	NONE	NONE	1.1702	3.24253	2.19476	23.2532	4.79671e-21	2.49735e-19
5:135508344:+,5:135510065:+	SMAD5	core	NM_001001419,NM_001001420,NM_005903	ENST00000514641,ENST00000514777,ENST00000545279,ENST00000545620	SMAD5.aAug10,SMAD5.bAug10,SMAD5.cAug10,SMAD5.eAug10	uc003lbj.1,uc003lbk.1,uc003lbl.1	2.12046	2.85241	2.4882	23.2504	4.81322e-21	2.50347e-19
1:40733544:+,1:40734091:+	ZMPSTE24	core	NM_005857	ENST00000372759	ZMPSTE24.aAug10,ZMPSTE24.cAug10,ZMPSTE24.gAug10	uc001cfg.2	2.05043	2.12343	3.19211	23.2344	4.91055e-21	2.55157e-19
4:26422347:+,4:26425964:+	RBPJ	core	NM_005349,NM_015874,NM_203283,NM_203284	ENST00000342295,ENST00000342320,ENST00000345843,ENST00000348160,ENST00000355476,ENST00000361572,ENST00000504907,ENST00000506903,ENST00000507561,ENST00000507574,ENST00000510778,ENST00000514380,ENST00000515573	RBPJ.aAug10,RBPJ.bAug10,RBPJ.cAug10,RBPJ.dAug10,RBPJ.eAug10,RBPJ.fAug10,RBPJ.gAug10,RBPJ.hAug10,RBPJ.iAug10,RBPJ.kAug10,RBPJ.lAug10,RBPJ.mAug10,RBPJ.vbAug10	uc003grx.1,uc003gry.1,uc003grz.1,uc003gsa.1,uc003gsb.1,uc003gsc.1,uc011bxt.1	1.77846	2.28407	2.94537	23.2132	5.04269e-21	2.60864e-19
6:4053107:+,6:4056555:+	PRPF4B	core	NM_003913	ENST00000337659,ENST00000463634,ENST00000466185,ENST00000480058,ENST00000481109,ENST00000538861	PRPF4B.aAug10,PRPF4B.bAug10,PRPF4B.cAug10,PRPF4B.dAug10,PRPF4B.kAug10,PRPF4B.mAug10	uc003mvv.2,uc003mvw.2,uc011dhv.1	2.54211	2.40926	2.73303	23.1955	5.15607e-21	2.66205e-19
12:4430469:+,12:4440446:+	C12orf5	core	NM_020375	ENST00000179259	C12orf5.aAug10	uc001qmp.2	1.90122	2.24652	3.12666	23.1849	5.22478e-21	2.69489e-19
11:62622023:+,11:62622896:+	SNHG1	novel	NONE	NONE	NONE	NONE	-0.152273	10.0556	-1.49912	23.1797	5.25926e-21	2.71134e-19
5:96508967:+,5:96512820:+	RIOK2	core	NM_001159749,NM_018343	ENST00000283109,ENST00000508447	RIOK2.aAug10,RIOK2.bAug10	uc003kmz.2,uc003kna.3	1.9345	2.22298	3.23444	23.1759	5.28428e-21	2.72057e-19
8:81892729:+,8:81897011:+	PAG1	core	NM_018440	ENST00000220597	PAG1.bAug10,PAG1.cAug10	uc003ybz.2	2.96417	3.20321	2.16572	23.1758	5.28491e-21	2.72057e-19
8:90926974:+,8:90933308:+	OSGIN2	core	NM_001126111,NM_004337	ENST00000297438,ENST00000451899,ENST00000520659	OSGIN2.aAug10,OSGIN2.bAug10,OSGIN2.cAug10	uc003yeg.2,uc003yeh.2	2.01184	2.8731	2.36429	23.1699	5.32402e-21	2.73401e-19
6:4057421:+,6:4058962:+	PRPF4B	core	NM_003913	ENST00000337659,ENST00000463634,ENST00000466185,ENST00000480058,ENST00000481109,ENST00000494674,ENST00000538861	PRPF4B.aAug10,PRPF4B.bAug10,PRPF4B.cAug10,PRPF4B.dAug10,PRPF4B.fAug10,PRPF4B.kAug10	uc003mvv.2,uc003mvw.2,uc011dhv.1	2.54211	2.37564	2.84771	23.1505	5.45559e-21	2.79612e-19
20:30327424:+,20:30345210:+	TPX2	extended	None	None	TPX2.eAug10,TPX2.gAug10	None	-0.0145131	2.95496	2.22831	23.141	5.52085e-21	2.82681e-19
3:98530398:+,3:98531176:+	DCBLD2	core	NM_080927	ENST00000326840,ENST00000326857,ENST00000404023,ENST00000470393,ENST00000479144,ENST00000494614	DCBLD2.aAug10,DCBLD2.bAug10,DCBLD2.cAug10,DCBLD2.dAug10,DCBLD2.hAug10,DCBLD2.iAug10	uc003dtd.2,uc003dte.2	1.72303	2.17107	3.31344	23.1376	5.54457e-21	2.83757e-19
8:118819616:+,8:118830674:+	EXT1	novel	NONE	NONE	NONE	NONE	1.46499	6.06945	1.49777	23.1265	5.62226e-21	2.87594e-19
14:69343957:+,14:69346679:+	ACTN1	extended	None	ENST00000555075	ACTN1.lAug10	None	0.191275	4.56423	1.58128	23.0975	5.83153e-21	2.97575e-19
2:170488443:+,2:170489670:+	PPIG	core	NM_004792	ENST00000260970,ENST00000409714,ENST00000433207,ENST00000448752,ENST00000462903,ENST00000466142,ENST00000482772,ENST00000530133	PPIG.aAug10,PPIG.bAug10,PPIG.cAug10,PPIG.dAug10,PPIG.eAug10,PPIG.gAug10	uc002uez.2,uc002ufa.2,uc002ufb.2,uc002ufd.2,uc010fpx.2,uc010fpy.2	1.97704	2.04676	3.39787	23.0784	5.97334e-21	3.04221e-19
16:56969224:+,16:56970599:+	HERPUD1	core	NM_001010990	ENST00000379792	HERPUD1.cAug10,HERPUD1.mAug10	uc002ekg.1	2.18223	7.72126	1.78193	23.0715	6.02584e-21	3.06746e-19	Figure 5F
22:41551117:+,22:41553173:+	EP300	core	NM_001429	ENST00000263253	EP300.aAug10	uc003azl.3	2.20621	2.34894	2.82004	23.0694	6.04122e-21	3.07381e-19
7:45023645:+,7:45026124:+	C7orf40	extended	None	None	C7orf40andSNORA9.jAug10	None	1.44389	4.64748	1.78686	23.0689	6.04524e-21	3.07436e-19
5:55259334:+,5:55259974:+	IL6ST	core	NM_001190981,NM_002184,NM_175767	ENST00000336909,ENST00000381287,ENST00000381294,ENST00000381298,ENST00000502326,ENST00000503773,ENST00000522633,ENST00000536319,ENST00000542298	IL6ST.aAug10,IL6ST.bAug10,IL6ST.cAug10,IL6ST.dAug10	uc003jqq.2,uc003jqr.2,uc010iwb.2,uc011cqk.1	1.90077	2.15207	3.71911	23.0579	6.12983e-21	3.10987e-19
1:93297674:+,1:93299102:+	RPL5	extended	None	None	RPL5andSNORD21andSNORA66.cAug10	None	1.18384	6.32408	1.70689	23.0512	6.18173e-21	3.13469e-19
20:19970955:+,20:19972812:+	RIN2	core	NM_001242581,NM_018993	ENST00000255006,ENST00000440354,ENST00000484638	RIN2.aAug10,RIN2.bAug10,RIN2.cAug10	uc002wro.1,uc010gcu.1,uc010gcv.1	1.43868	2.05434	3.3475	23.0406	6.26494e-21	3.1723e-19
12:107349843:+,12:107360889:+	C12orf23	extended	None	ENST00000548125	C12orf23.dAug10,C12orf23.iAug10	uc001tmc.2	-0.826175	3.6144	1.94631	23.0386	6.28074e-21	3.17724e-19
6:127636041:+,6:127648147:+	ECHDC1	core	NM_001105545,NM_018479	ENST00000368289,ENST00000368291,ENST00000528402	ECHDC1.hAug10,ECHDC1.iAug10,ECHDC1.pAug10	uc003qay.3,uc010kez.2	0.614537	2.70848	2.83019	23.0331	6.32396e-21	3.19603e-19
2:187519435:+,2:187520974:+	ITGAV	core	NM_001144999,NM_001145000,NM_002210	ENST00000261023,ENST00000374907,ENST00000433736	ITGAV.aAug10,ITGAV.bAug10	uc002upq.2,uc010frs.2,uc010zfv.1	2.28123	2.33258	3.39917	23.0313	6.33894e-21	3.20052e-19
10:116606126:+,10:116606318:+	FAM160B1	core	NM_001135051,NM_020940	ENST00000369248,ENST00000369250	FAM160B1andRPL15P13.aAug10,FAM160B1andRPL15P13.bAug10,FAM160B1andRPL15P13.cAug10	uc001lcb.2,uc001lcc.2	3.41984	3.34691	2.09801	23.0007	6.58854e-21	3.31066e-19
1:201924680:+,1:201926639:+	TIMM17A	novel	NONE	NONE	NONE	NONE	1.37007	9.96008	-1.54807	22.9767	6.79098e-21	3.39988e-19
12:69214154:+,12:69218335:+	MDM2	novel	NONE	NONE	NONE	NONE	2.96722	10.7487	-1.15416	22.975	6.806e-21	3.4053e-19
9:82337516:+,9:82339952:+	TLE4	novel	NONE	NONE	NONE	NONE	0.699885	9.75152	-1.65183	22.9327	7.17987e-21	3.57356e-19
10:116606487:+,10:116606849:+	FAM160B1	core	NM_001135051,NM_020940	ENST00000369248,ENST00000369250	FAM160B1andRPL15P13.aAug10,FAM160B1andRPL15P13.bAug10,FAM160B1andRPL15P13.cAug10	uc001lcb.2,uc001lcc.2	3.41984	3.24342	2.06737	22.9266	7.23595e-21	3.59308e-19
4:166254777:+,4:166258941:+	SC4MOL	core	NM_006745	ENST00000261507,ENST00000504317,ENST00000507013	SC4MOL.aAug10,SC4MOL.bAug10,SC4MOL.dAug10,SC4MOL.eAug10,SC4MOL.fAug10	uc003ire.2,uc010irb.2	2.73603	2.49506	2.78698	22.9224	7.27487e-21	3.6107e-19
4:57889917:+,4:57891052:+	POLR2B	novel	NONE	NONE	NONE	NONE	1.36986	9.8425	-1.60598	22.8976	7.50695e-21	3.71363e-19
2:24291329:+,2:24299070:+	SF3B14	extended	None	None	SF3B14.gAug10	uc010eyb.2	1.28218	3.29097	2.12832	22.8893	7.58582e-21	3.74736e-19
11:128350346:+,11:128354718:+	ETS1	core	NM_001143820,NM_005238	ENST00000319397,ENST00000392668,ENST00000531611	ETS1.aAug10,ETS1.bAug10,ETS1.cAug10,ETS1.dAug10,ETS1.eAug10,ETS1.iAug10	uc001qej.2,uc009zcg.2,uc010sbs.1	2.39711	2.38298	3.4883	22.882	7.65672e-21	3.77987e-19
5:55278639:+,5:55290612:+	IL6ST	core	NM_001190981,NM_002184,NM_175767	ENST00000381298	IL6ST.aAug10,IL6ST.bAug10,IL6ST.cAug10,IL6ST.dAug10,IL6ST.nAug10	uc003jqq.2,uc003jqr.2	1.90077	2.35118	3.12284	22.8752	7.72358e-21	3.80826e-19
10:116596005:+,10:116602692:+	FAM160B1	core	NM_001135051,NM_020940	ENST00000369248,ENST00000369250	FAM160B1andRPL15P13.aAug10,FAM160B1andRPL15P13.bAug10	uc001lcb.2,uc001lcc.2	3.41984	3.66352	1.91365	22.8633	7.8406e-21	3.86234e-19
9:70857101:+,9:70860129:+	CBWD3	core	NM_201453	ENST00000360171,ENST00000377342,ENST00000447896,ENST00000455061,ENST00000455820,ENST00000478048,ENST00000479104	CBWD3.aAug10,CBWD3.bAug10,CBWD3.cAug10,CBWD3.dAug10,CBWD3.fAug10,CBWD3.gAug10,CBWD3.hAug10,CBWD3.jAug10,CBWD3.lAug10,CBWD3.nAug10,CBWD3.oAug10	uc004agh.3,uc004agi.3,uc004agj.3,uc011lro.1,uc011lrp.1	1.14528	2.52735	2.88941	22.8622	7.85152e-21	3.86591e-19
18:32917734:+,18:32919793:+	ZNF24	core	NM_006965	ENST00000261332,ENST00000399061	ZNF24.aAug10,ZNF24.bAug10	uc002kys.2,uc002kyt.2	2.68492	2.16817	3.00042	22.8438	8.03757e-21	3.93908e-19
10:5808258:+,10:5810176:+	GDI2	extended	None	ENST00000380153,ENST00000447751	GDI2.dAug10	None	0.111873	3.92312	1.74393	22.8281	8.19911e-21	4.00519e-19
1:100527505:+,1:100533533:+	HIAT1	core	NM_033055	ENST00000370152	HIAT1.aAug10	uc001dst.2	1.6535	2.14885	3.29545	22.8071	8.42113e-21	4.10297e-19
12:96588483:+,12:96617343:+	ELK3	core	NM_005230	ENST00000228741,ENST00000552142	ELK3.aAug10,ELK3.bAug10	uc001teo.1	2.11873	2.43299	3.12025	22.7997	8.50126e-21	4.13551e-19
5:135499080:+,5:135508123:+	SMAD5	core	NM_001001419,NM_001001420,NM_005903	ENST00000507637,ENST00000514641,ENST00000545279,ENST00000545620	SMAD5.aAug10,SMAD5.bAug10,SMAD5.cAug10,SMAD5.dAug10	uc003lbj.1,uc003lbk.1,uc003lbl.1	2.12046	2.60324	2.71875	22.7958	8.54359e-21	4.15418e-19
2:170471003:+,2:170471095:+	PPIG	core	NM_004792	ENST00000260970,ENST00000409714,ENST00000414307,ENST00000417938,ENST00000433207,ENST00000448752,ENST00000462903,ENST00000530133	PPIG.aAug10,PPIG.bAug10,PPIG.cAug10,PPIG.dAug10,PPIG.eAug10	uc002uez.2,uc002ufa.2,uc002ufb.2,uc002ufc.1,uc002ufd.2,uc010fpx.2,uc010fpy.2	1.97704	2.16618	3.2285	22.7927	8.57713e-21	4.16664e-19
21:27269985:+,21:27284053:+	APP	core	NM_001204301,NM_001204302,NM_001204303	ENST00000358918,ENST00000456209	APP.hAug10	None	1.36309	3.52682	2.04231	22.7854	8.6573e-21	4.20364e-19
8:81889141:+,8:81892670:+	PAG1	core	NM_018440	ENST00000220597	PAG1.bAug10,PAG1.cAug10	uc003ybz.2	2.96417	3.28168	2.13808	22.778	8.7392e-21	4.23559e-19
9:175784:+,9:178816:+	CBWD1	core	NM_001145356,NM_018491	ENST00000356521,ENST00000377347,ENST00000377400,ENST00000377447,ENST00000382393,ENST00000382447,ENST00000417415	CBWD1.aAug10,CBWD1.bAug10,CBWD1.eAug10,CBWD1.hAug10	uc003zga.3,uc003zgc.3,uc003zgd.2	0.388995	2.2842	3.02051	22.7776	8.74389e-21	4.23592e-19
7:43663487:+,7:43664117:+	STK17A	core	NM_004760	ENST00000319357,ENST00000474211	STK17A.aAug10,STK17A.bAug10	uc003tih.2	2.24179	2.15636	3.60422	22.77	8.82908e-21	4.27325e-19
4:83280792:+,4:83294599:+	HNRNPD	core	NM_001003810,NM_031369	ENST00000307213,ENST00000352301,ENST00000503822,ENST00000543098	HNRNPD.bAug10,HNRNPD.cAug10,HNRNPD.hAug10,HNRNPD.jAug10	uc003hmn.1,uc003hmp.1,uc010ijr.1	0.34305	2.25576	3.13451	22.7684	8.84673e-21	4.27786e-19
14:90863577:+,14:90867603:+	CALM1	novel	NONE	NONE	NONE	NONE	0.307567	9.70931	-1.67311	22.7643	8.89389e-21	4.29374e-19
1:173835344:+,1:173835763:+	GAS5	novel	NONE	NONE	NONE	NONE	0.884677	9.83969	-1.60809	22.7642	8.89453e-21	4.29374e-19
7:107389492:+,7:107393856:+	CBLL1	core	NM_024814	ENST00000415884,ENST00000420796,ENST00000440859,ENST00000487517	CBLL1.aAug10,CBLL1.cAug10,CBLL1.eAug10,CBLL1.gAug10,CBLL1.hAug10,CBLL1.iAug10	uc003veq.2	2.02235	2.52116	2.60477	22.7469	9.09241e-21	4.38055e-19
12:90020392:+,12:90024282:+	ATP2B1	novel	NONE	NONE	NONE	NONE	0.00184738	9.92861	-1.56384	22.7193	9.41958e-21	4.52198e-19
3:170102553:+,3:170108011:+	SKIL	core	NM_001145098,NM_001248008,NM_005414	ENST00000259119,ENST00000426052,ENST00000458537	SKIL.aAug10,SKIL.bAug10,SKIL.cAug10	uc003fgu.2,uc003fgw.2,uc011bps.1	2.89546	3.31884	1.96018	22.696	9.70389e-21	4.64749e-19
5:126853468:+,5:126859152:+	PRRC1	core	NM_130809	ENST00000296666,ENST00000330542,ENST00000414018,ENST00000442138,ENST00000512535,ENST00000512635,ENST00000512871	PRRC1.aAug10,PRRC1.bAug10,PRRC1.cAug10,PRRC1.fAug10	uc003kuj.3,uc003kuk.2	1.59029	2.09075	3.33257	22.6798	9.90638e-21	4.7294e-19
10:116605848:+,10:116605934:+	FAM160B1	core	NM_001135051,NM_020940	ENST00000369248,ENST00000369250	FAM160B1andRPL15P13.aAug10,FAM160B1andRPL15P13.bAug10	uc001lcb.2,uc001lcc.2	3.41984	3.73857	1.84518	22.6573	1.0196e-20	4.85666e-19
12:88910267:+,12:88912474:+	KITLG	core	NM_000899,NM_003994	ENST00000228280,ENST00000347404,ENST00000378535	KITLG.aAug10,KITLG.bAug10,KITLG.cAug10,KITLG.dAug10	uc001tav.2,uc001taw.2	3.45509	3.54713	1.89724	22.6562	1.02111e-20	4.86163e-19
8:81899701:+,8:81903714:+	PAG1	core	NM_018440	ENST00000220597	PAG1.bAug10	uc003ybz.2	2.96417	3.40859	2.10196	22.6234	1.06486e-20	5.05163e-19
2:170465268:+,2:170470974:+	PPIG	core	NM_004792	ENST00000260970,ENST00000409714,ENST00000414307,ENST00000417938,ENST00000433207,ENST00000448752,ENST00000462903,ENST00000530133	PPIG.aAug10,PPIG.bAug10,PPIG.cAug10,PPIG.dAug10,PPIG.eAug10	uc002uez.2,uc002ufa.2,uc002ufb.2,uc002ufc.1,uc002ufd.2,uc010fpx.2,uc010fpy.2	1.97704	2.09406	3.13886	22.622	1.06679e-20	5.05854e-19
12:59276814:+,12:59279613:+	LRIG3	novel	NONE	NONE	NONE	NONE	2.08927	9.69801	-1.67892	22.6107	1.08238e-20	5.12785e-19
3:156411977:+,3:156413654:+	TIPARP	core	NM_001184717,NM_001184718,NM_015508	ENST00000295924,ENST00000461166,ENST00000473702,ENST00000481853,ENST00000486483,ENST00000495891,ENST00000542783	TIPARP.aAug10,TIPARP.bAug10,TIPARP.cAug10,TIPARP.dAug10,TIPARP.eAug10	uc003fav.2,uc003faw.2	2.02256	2.22679	3.3011	22.6017	1.09498e-20	5.18286e-19
7:56170704:+,7:56174057:+	CHCHD2	extended	None	None	CHCHD2.gAug10	None	1.15024	5.60099	1.7036	22.5717	1.13788e-20	5.37625e-19
1:94343418:+,1:94344633:+	DNTTIP2	core	NM_014597	ENST00000359208,ENST00000436063	DNTTIP2.aAug10,DNTTIP2.bAug10	uc001dqf.2,uc010otm.1	1.80785	2.05255	3.6557	22.57	1.14038e-20	5.38324e-19
19:16296576:+,19:16301698:+	FAM32A	extended	None	None	FAM32A.eAug10	None	-0.642647	3.79956	1.75576	22.5693	1.14136e-20	5.38543e-19
13:96412475:+,13:96415897:+	DNAJC3	novel	NONE	NONE	NONE	NONE	2.54568	9.66351	-1.6961	22.549	1.17158e-20	5.50578e-19
14:45576819:+,14:45577618:+	PRPF39	core	NM_017922	ENST00000355765,ENST00000355846,ENST00000424478,ENST00000477626,ENST00000554081,ENST00000554429,ENST00000554439	PRPF39.aAug10,PRPF39.bAug10,PRPF39.cAug10	uc001wvy.3,uc001wvz.3,uc010and.2	2.37791	2.19217	3.53774	22.5354	1.19235e-20	5.58842e-19
2:187521128:+,2:187523765:+	ITGAV	core	NM_001144999,NM_001145000,NM_002210	ENST00000261023,ENST00000374907,ENST00000433736	ITGAV.aAug10,ITGAV.bAug10	uc002upq.2,uc010frs.2,uc010zfv.1	2.28123	2.21359	3.40245	22.508	1.23513e-20	5.77608e-19
5:55238579:+,5:55243321:+	IL6ST	core	NM_001190981,NM_002184,NM_175767	ENST00000336909,ENST00000381287,ENST00000381294,ENST00000381298,ENST00000502326,ENST00000503773,ENST00000523039,ENST00000536319	IL6ST.aAug10,IL6ST.bAug10,IL6ST.cAug10,IL6ST.dAug10,IL6ST.mAug10	uc003jqq.2,uc003jqr.2,uc010iwb.2,uc011cqk.1	1.90077	2.02476	3.77167	22.5024	1.24396e-20	5.81476e-19
6:4037804:+,6:4041006:+	PRPF4B	core	NM_003913	ENST00000337659,ENST00000480058,ENST00000481109,ENST00000538861	PRPF4B.aAug10,PRPF4B.bAug10,PRPF4B.cAug10,PRPF4B.dAug10	uc003mvv.2,uc003mvw.2,uc011dhv.1	2.54211	2.46035	2.91173	22.4991	1.24925e-20	5.83693e-19
10:116602985:+,10:116603500:+	FAM160B1	core	NM_001135051,NM_020940	ENST00000369248,ENST00000369250	FAM160B1andRPL15P13.aAug10,FAM160B1andRPL15P13.bAug10	uc001lcb.2,uc001lcc.2	3.41984	3.54415	1.76216	22.4948	1.25628e-20	5.86456e-19
3:195385036:+,3:195388627:+	SDHAP2	core	NR_003265	ENST00000414625,ENST00000425425,ENST00000429897,ENST00000445430,ENST00000452844,ENST00000453324,ENST00000455183,ENST00000457233	SDHAP2andMUC20.dAug10,SDHAP2andMUC20.eAug10,SDHAP2andMUC20.fAug10,SDHAP2andMUC20.nAug10,SDHAP2andMUC20.oAug10,SDHAP2andMUC20.vfAug10,SDHAP2andMUC20.vnAug10,SDHAP2andMUC20.voAug10,SDHAP2andMUC20.vuAug10,SDHAP2andMUC20.waAug10	uc003fut.3,uc003fuu.3,uc003fuv.2,uc003fuw.2	2.01632	3.85404	1.7086	22.4939	1.25772e-20	5.86866e-19
12:57065631:+,12:57066736:+	PTGES3	novel	NONE	NONE	NONE	NONE	-0.364922	9.6678	-1.69323	22.4684	1.29971e-20	6.04928e-19
9:70486879:+,9:70489915:+	CBWD3,CBWD5	core	NM_001024916,NM_201453	ENST00000377384,ENST00000377395,ENST00000382404,ENST00000382405,ENST00000429800,ENST00000430059,ENST00000476161,ENST00000480229,ENST00000486221,ENST00000486466,ENST00000497250	CBWD5.bAug10,CBWD5.cAug10,CBWD5.dAug10,CBWD5.eAug10,CBWD5.fAug10,CBWD5.gAug10,CBWD5.mAug10,CBWD5.nAug10,CBWD5.oAug10,CBWD5.pAug10,CBWD5.rAug10,CBWD5.tAug10,CBWD5.vdAug10	uc004afy.3,uc004aga.3,uc004agb.3,uc004agc.3,uc004age.2,uc010moe.1,uc011lrm.1,uc011lrn.1	1.2025	2.65094	2.62714	22.4615	1.31141e-20	6.09182e-19
7:17374620:+,7:17375269:+	AHR	core	NM_001621	ENST00000242057,ENST00000463496,ENST00000481944	AHR.aAug10,AHR.bAug10,AHR.dAug10	uc003stt.3,uc011jxz.1	2.56517	2.5155	2.53038	22.4608	1.31249e-20	6.09182e-19
3:48730612:+,3:48732523:+	IP6K2	core	NM_001005909,NM_016291	ENST00000328631,ENST00000412850,ENST00000413654,ENST00000437427,ENST00000443853,ENST00000454335,ENST00000479914	IP6K2.bAug10,IP6K2.cAug10,IP6K2.eAug10,IP6K2.fAug10,IP6K2.gAug10,IP6K2.rAug10,IP6K2.sAug10,IP6K2.vhAug10,IP6K2.vjAug10,IP6K2.vuAug10,IP6K2.vwAug10	uc003cup.2,uc003cuq.2	0.338302	3.20967	2.2031	22.445	1.33961e-20	6.20402e-19
6:41060824:+,6:41062135:+	NFYA	core	NM_002505,NM_021705	ENST00000341376,ENST00000353205	NFYA.bAug10,NFYA.cAug10,NFYA.dAug10,NFYA.mAug10	uc003opo.2,uc003opp.2,uc003opq.2	2.62712	2.68762	2.46113	22.4213	1.38119e-20	6.37736e-19
16:3115495:+,16:3117378:+	IL32	extended	None	ENST00000531965	IL32.hAug10	uc010btb.2	1.35596	4.43579	1.59892	22.4173	1.38838e-20	6.40168e-19
5:34812050:+,5:34814688:+	RAI14	novel	NONE	NONE	NONE	NONE	-1.27403	9.98142	-1.53596	22.4071	1.4069e-20	6.48116e-19
8:90801710:+,8:90802307:+	RIPK2	core	NM_003821	ENST00000220751,ENST00000522965,ENST00000540020	RIPK2.aAug10,RIPK2.bAug10	uc003yee.2,uc003yef.2	1.88115	2.07374	3.07228	22.4067	1.40746e-20	6.48116e-19
9:101910066:+,9:101911462:+	TGFBR1	core	NM_001130916,NM_004612	ENST00000374990,ENST00000374994,ENST00000540092,ENST00000546096,ENST00000549766,ENST00000550253,ENST00000552516	TGFBR1.aAug10,TGFBR1.bAug10,TGFBR1.cAug10,TGFBR1.iAug10	uc004azc.2,uc004azd.2,uc011lvc.1	2.17317	2.10369	3.38225	22.39	1.43827e-20	6.61145e-19
17:74553939:+,17:74557370:+	ENSG00000163597,LOC100507246,LOC100507246,SNORD1C,SNORD1C,uc002jsb.1	core	NR_038110,NR_038111	ENST00000493536	SNORD1C.bAug10,SNORD1C.fAug10	uc002jsb.1	2.01433	2.01371	3.66823	22.3872	1.44352e-20	6.62981e-19
4:170017838:+,4:170027998:+	SH3RF1	core	NM_020870	ENST00000284637	SH3RF1.aAug10	uc003isa.1	3.15288	3.24825	2.41821	22.3868	1.44431e-20	6.63052e-19
7:92205135:+,7:92206417:+	FAM133B,LOC728066	core	NM_001040057,NM_152789,NR_034169	ENST00000415397,ENST00000427372,ENST00000438306,ENST00000445716,ENST00000481407,ENST00000490747,ENST00000494079	FAM133B.aAug10,FAM133B.bAug10,FAM133B.cAug10,FAM133B.dAug10,FAM133B.eAug10,FAM133B.fAug10,FAM133B.gAug10,FAM133B.hAug10,FAM133B.iAug10,FAM133B.jAug10,FAM133B.oAug10	uc003umb.2,uc003umc.2,uc003umd.2	2.22675	2.2969	3.36123	22.3764	1.46389e-20	6.71195e-19
19:2476628:+,19:2477027:+	GADD45B	core	NM_015675	ENST00000215631	GADD45B.cAug10,GADD45B.dAug10,GADD45B.gAug10,GADD45B.hAug10	uc002lwb.1,uc002lwc.1,uc010dtd.1	1.74474	2.01068	4.09376	22.3731	1.47008e-20	6.73541e-19
1:40747199:+,1:40751597:+	ZMPSTE24	core	NM_005857	ENST00000372759	ZMPSTE24.aAug10,ZMPSTE24.bAug10	uc001cfg.2	2.05043	2.02252	3.28208	22.3626	1.49029e-20	6.81189e-19
3:194134568:+,3:194146071:+	ATP13A3	novel	NONE	NONE	NONE	NONE	1.71466	9.9956	-1.53067	22.3221	1.57054e-20	7.14459e-19
11:128359385:+,11:128360352:+	ETS1	core	NM_001143820,NM_005238	ENST00000319397,ENST00000345075,ENST00000392668,ENST00000526145,ENST00000531611	ETS1.aAug10,ETS1.bAug10,ETS1.cAug10,ETS1.dAug10,ETS1.eAug10	uc001qej.2,uc009zcg.2,uc010sbs.1	2.39711	2.28903	3.32521	22.3199	1.57511e-20	7.15918e-19
12:69237612:+,12:69237714:+	MDM2	extended	None	ENST00000400501	MDM2.tAug10	None	2.96722	2.85318	2.5771	22.3114	1.59244e-20	7.22856e-19
7:157155964:+,7:157160067:+	DNAJB6	novel	NONE	NONE	NONE	NONE	0.0741968	10.759	-1.14903	22.3084	1.59881e-20	7.24808e-19
12:112920009:+,12:112939948:+	PTPN11	novel	NONE	NONE	NONE	NONE	1.12199	9.64956	-1.70245	22.2962	1.62423e-20	7.34434e-19
2:187501836:+,2:187503004:+	ITGAV	core	NM_001144999,NM_001145000,NM_002210	ENST00000261023,ENST00000374907,ENST00000433736,ENST00000544640	ITGAV.aAug10,ITGAV.bAug10	uc002upq.2,uc010frs.2,uc010zfv.1	2.28123	2.25859	3.54176	22.2786	1.66175e-20	7.50435e-19
12:96653631:+,12:96660860:+	ELK3	core	NM_005230	ENST00000228741,ENST00000549529,ENST00000549985,ENST00000552142	ELK3.bAug10,ELK3.cAug10,ELK3.dAug10	uc001teo.1	2.11873	2.01246	3.30417	22.2776	1.66404e-20	7.51147e-19
1:150298339:+,1:150300779:+	PRPF3	core	NM_004698	ENST00000324862	PRPF3.aAug10,PRPF3.bAug10,PRPF3.dAug10,PRPF3.gAug10,PRPF3.hAug10	uc001eum.3,uc009wlo.2,uc010pca.1	2.44204	2.59396	2.47997	22.252	1.72037e-20	7.73917e-19
4:123748507:+,4:123797476:+	FGF2	core	NM_002006	ENST00000264498	FGF2.aAug10,FGF2.bAug10	uc003iev.1	2.11101	2.23483	2.99096	22.2508	1.72299e-20	7.74762e-19
2:88887622:+,2:88888279:+	EIF2AK3	core	NM_004836	ENST00000303236,ENST00000415570,ENST00000419748,ENST00000535951	EIF2AK3.aAug10,EIF2AK3.bAug10,EIF2AK3.cAug10	uc002stc.3	2.82567	2.94465	2.21675	22.247	1.7314e-20	7.78212e-19
5:96513552:+,5:96514759:+	RIOK2	core	NM_001159749,NM_018343	ENST00000283109,ENST00000508447,ENST00000508991	RIOK2.aAug10,RIOK2.bAug10,RIOK2.dAug10	uc003kmz.2,uc003kna.3	1.9345	2.05093	3.24846	22.2419	1.74313e-20	7.82819e-19
7:141438303:+,7:141441969:+	SSBP1	novel	NONE	NONE	NONE	NONE	0.822413	9.51382	-1.77094	22.2335	1.76227e-20	7.90399e-19
11:62620587:+,11:62621273:+	SNHG1	novel	NONE	NONE	NONE	NONE	-0.152273	9.50429	-1.77541	22.2289	1.77277e-20	7.9443e-19
10:112063345:+,10:112064506:+	SMNDC1	core	NM_005871	ENST00000369603,ENST00000460483,ENST00000471297	SMNDC1.bAug10,SMNDC1.cAug10,SMNDC1.eAug10,SMNDC1.fAug10,SMNDC1.gAug10,SMNDC1.iAug10,SMNDC1.jAug10	uc001kzc.3	2.42858	2.5776	2.81156	22.2212	1.79071e-20	8.0145e-19
10:116590689:+,10:116592992:+	FAM160B1	core	NM_001135051,NM_020940	ENST00000369246,ENST00000369248,ENST00000369250	FAM160B1andRPL15P13.aAug10,FAM160B1andRPL15P13.bAug10	uc001lcb.2,uc001lcc.2	3.41984	3.79643	1.70953	22.2207	1.79192e-20	8.0165e-19
14:21679465:+,14:21679969:+	HNRNPC	extended	None	ENST00000556142,ENST00000556513	None	None	1.53469	5.29511	1.41167	22.2194	1.79492e-20	8.02648e-19
3:178745600:+,3:178748668:+	ZMAT3	core	NM_022470,NM_152240	ENST00000311417,ENST00000414084,ENST00000432729	ZMAT3.aAug10,ZMAT3.bAug10,ZMAT3.cAug10	uc003fjg.2,uc003fji.2,uc010hxa.2	3.48829	3.40053	2.15256	22.2076	1.82264e-20	8.14286e-19
4:26417262:+,4:26422173:+	RBPJ	core	NM_005349,NM_015874,NM_203283,NM_203284	ENST00000342295,ENST00000342320,ENST00000345843,ENST00000348160,ENST00000355476,ENST00000361572,ENST00000504907,ENST00000504938,ENST00000507561,ENST00000507574,ENST00000510778,ENST00000511451,ENST00000511546,ENST00000512671,ENST00000514380,ENST00000514675,ENST00000514730,ENST00000515573	RBPJ.aAug10,RBPJ.bAug10,RBPJ.cAug10,RBPJ.dAug10,RBPJ.eAug10,RBPJ.fAug10,RBPJ.gAug10,RBPJ.hAug10,RBPJ.iAug10,RBPJ.kAug10,RBPJ.lAug10,RBPJ.mAug10,RBPJ.nAug10,RBPJ.oAug10,RBPJ.pAug10,RBPJ.vbAug10	uc003grx.1,uc003gry.1,uc003grz.1,uc003gsa.1,uc003gsb.1,uc003gsc.1,uc011bxt.1	1.77846	2.45861	2.52748	22.2046	1.8297e-20	8.16465e-19
1:109238959:+,1:109241226:+	PRPF38B	core	NM_018061,NR_037185	ENST00000370021,ENST00000370025	PRPF38B.aAug10,PRPF38B.bAug10,PRPF38B.hAug10	uc001dvv.3,uc001dvw.3	2.4139	2.64252	2.66175	22.1992	1.84285e-20	8.21987e-19
10:13629152:+,10:13639458:+	PRPF18	core	NM_003675	ENST00000378572	PRPF18.aAug10,PRPF18.dAug10,PRPF18.rAug10	uc001imp.2	2.0355	2.60178	2.43707	22.1857	1.87557e-20	8.3481e-19
2:88888419:+,2:88889961:+	EIF2AK3	core	NM_004836	ENST00000303236,ENST00000415570,ENST00000419748,ENST00000535951	EIF2AK3.aAug10,EIF2AK3.bAug10,EIF2AK3.cAug10	uc002stc.3	2.82567	3.24152	1.90752	22.1831	1.88172e-20	8.37194e-19
8:42251796:+,8:42256230:+	VDAC3	extended	None	ENST00000518563	VDAC3.dAug10	None	-0.208998	6.75043	1.29592	22.1769	1.89719e-20	8.43366e-19
12:6601633:+,12:6602224:+	MRPL51	novel	NONE	NONE	NONE	NONE	0.364396	9.96379	-1.54633	22.1714	1.91068e-20	8.48286e-19
20:55088484:+,20:55092162:+	C20orf43,GCNT7	extended	None	ENST00000395881	C20orf43.dAug10	uc002xxv.2	0.490318	4.93062	1.42762	22.159	1.942e-20	8.61827e-19
1:70694238:+,1:70697951:+	SRSF11	core	NM_001190987,NM_004768	ENST00000370950,ENST00000370951,ENST00000395136,ENST00000405432,ENST00000486667	SRSF11.aAug10,SRSF11.bAug10,SRSF11.cAug10,SRSF11.dAug10,SRSF11.eAug10,SRSF11.fAug10,SRSF11.hAug10,SRSF11.vaAug10	uc001des.2,uc001det.2,uc001deu.2	1.16259	2.10797	3.34048	22.1575	1.94581e-20	8.63156e-19
10:116603696:+,10:116605126:+	FAM160B1	core	NM_001135051,NM_020940	ENST00000369248,ENST00000369250	FAM160B1andRPL15P13.aAug10,FAM160B1andRPL15P13.bAug10	uc001lcb.2,uc001lcc.2	3.41984	3.70823	1.85284	22.1531	1.95709e-20	8.67579e-19
2:28616689:+,2:28626974:+	FOSL2	core	NM_005253	ENST00000264716	FOSL2.aAug10,FOSL2.dAug10	uc002rma.2	1.75023	2.07553	3.41686	22.1454	1.97677e-20	8.75725e-19
3:156421491:+,3:156422473:+	TIPARP	core	NM_001184717,NM_001184718,NM_015508	ENST00000295924,ENST00000461166,ENST00000481853,ENST00000486483,ENST00000495891,ENST00000542783	TIPARP.aAug10,TIPARP.bAug10,TIPARP.cAug10,TIPARP.eAug10	uc003fav.2,uc003faw.2	2.02256	2.25569	3.39661	22.1368	1.999e-20	8.84511e-19
1:16458934:+,1:16459675:+	EPHA2	core	NM_004431	ENST00000358432	EPHA2.aAug10	uc001aya.1	1.80946	2.44069	2.71193	22.1308	2.0149e-20	8.90422e-19
4:170076726:+,4:170077555:+	SH3RF1	core	NM_020870	ENST00000284637,ENST00000508685,ENST00000511421	SH3RF1.aAug10,SH3RF1.bAug10	uc003isa.1,uc010irc.1	3.15288	3.1556	2.2929	22.1056	2.0825e-20	9.1683e-19
1:150316737:+,1:150316910:+	PRPF3	core	NM_004698	ENST00000324862,ENST00000414970,ENST00000543398	PRPF3.aAug10,PRPF3.bAug10,PRPF3.cAug10,PRPF3.fAug10	uc001eum.3,uc009wlp.2,uc010pca.1,uc010pcb.1	2.44204	2.28682	2.86673	22.0989	2.10079e-20	9.23726e-19
2:68413784:+,2:68415646:+	PPP3R1	novel	NONE	NONE	NONE	NONE	1.12026	9.65966	-1.69694	22.0974	2.10476e-20	9.25082e-19
11:46773084:+,11:46774860:+	CKAP5	novel	NONE	NONE	NONE	NONE	-0.615706	9.42655	-1.81443	22.0804	2.15222e-20	9.4397e-19
1:109238392:+,1:109238665:+	PRPF38B	core	NM_018061,NR_037185	ENST00000370021,ENST00000370022,ENST00000370025,ENST00000467302	PRPF38B.aAug10,PRPF38B.bAug10,PRPF38B.cAug10,PRPF38B.gAug10,PRPF38B.lAug10	uc001dvv.3,uc001dvw.3	2.4139	2.47738	2.53546	22.0671	2.18996e-20	9.58525e-19
1:109241449:+,1:109241784:+	PRPF38B	core	NM_018061,NR_037185	ENST00000370021,ENST00000370025,ENST00000485810	PRPF38B.aAug10,PRPF38B.bAug10,PRPF38B.fAug10,PRPF38B.hAug10,PRPF38B.kAug10	uc001dvv.3,uc001dvw.3,uc010ouz.1	2.4139	2.15657	3.13394	22.0465	2.25004e-20	9.83187e-19
1:40724066:+,1:40726511:+	ZMPSTE24	core	NM_005857	ENST00000372759	ZMPSTE24.aAug10,ZMPSTE24.cAug10,ZMPSTE24.gAug10	uc001cfg.2	2.05043	2.19464	3.2723	22.0423	2.26237e-20	9.88164e-19
1:16458768:+,1:16458873:+	EPHA2	core	NM_004431	ENST00000358432	EPHA2.aAug10	uc001aya.1	1.80946	2.37441	2.77082	22.0405	2.26773e-20	9.89682e-19
5:55272121:+,5:55278552:+	IL6ST	core	NM_001190981,NM_002184,NM_175767	ENST00000381298,ENST00000522633	IL6ST.aAug10,IL6ST.bAug10,IL6ST.cAug10,IL6ST.dAug10,IL6ST.nAug10	uc003jqq.2,uc003jqr.2,uc011cqk.1	1.90077	2.00874	3.52613	22.0243	2.31666e-20	1.00895e-18
11:118626212:+,11:118626969:+	DDX6	core	NM_004397	ENST00000264018,ENST00000526070,ENST00000529162,ENST00000534980	DDX6.aAug10,DDX6.bAug10,DDX6.cAug10,DDX6.dAug10	uc001pua.2,uc001pub.2,uc001puc.2	1.93343	2.04968	3.59404	22.0227	2.32143e-20	1.0106e-18
14:73563808:+,14:73566375:+	RBM25	novel	NONE	NONE	NONE	NONE	2.1353	9.39015	-1.8324	22.0152	2.34448e-20	1.02022e-18
7:104716528:+,7:104717410:+	MLL5	core	NM_018682,NM_182931	ENST00000257745,ENST00000311117,ENST00000334877,ENST00000334884,ENST00000334914,ENST00000351043,ENST00000393656,ENST00000476671,ENST00000478990,ENST00000482560,ENST00000537308	MLL5.aAug10,MLL5.cAug10,MLL5.dAug10,MLL5.eAug10,MLL5.gAug10	uc003vcl.2,uc003vcm.2,uc003vco.1,uc010lja.1,uc010ljb.1,uc010ljc.2	1.49049	2.04935	3.45057	22.0088	2.3643e-20	1.02757e-18
2:170460771:+,2:170462549:+	PPIG	core	NM_004792	ENST00000260970,ENST00000409714,ENST00000414307,ENST00000418888,ENST00000448752,ENST00000462903,ENST00000530133,ENST00000530152	PPIG.aAug10,PPIG.bAug10,PPIG.dAug10,PPIG.eAug10,PPIG.gAug10,PPIG.hAug10	uc002uez.2,uc002ufa.2,uc002ufb.2,uc002ufc.1,uc002ufd.2,uc010fpx.2	1.97704	2.06025	3.21594	21.9954	2.40624e-20	1.04364e-18
X:152771534:+,X:152771987:+	BGN	core	NM_001711	ENST00000331595,ENST00000370204,ENST00000430380,ENST00000431891,ENST00000472615,ENST00000480756,ENST00000492658	BGN.aAug10,BGN.bAug10,BGN.dAug10	uc004fhq.1,uc004fhr.1	2.06987	2.10545	3.65824	21.9766	2.46653e-20	1.06671e-18
2:197008410:+,2:197010635:+	STK17B	core	NM_004226	ENST00000263955,ENST00000409228	STK17B.aAug10,STK17B.bAug10	uc002utk.2,uc010fsh.2	2.49976	2.53575	3.17078	21.9747	2.47256e-20	1.06844e-18
17:41150488:+,17:41151950:+	RPL27	extended	None	None	RPL27.eAug10	None	1.10931	5.48543	1.32251	21.9483	2.55999e-20	1.10125e-18
22:41548354:+,22:41550999:+	EP300	core	NM_001429	ENST00000263253	EP300.aAug10	uc003azl.3	2.20621	2.36368	2.63712	21.9452	2.57037e-20	1.10526e-18
6:4044257:+,6:4047409:+	PRPF4B	core	NM_003913	ENST00000337659,ENST00000463634,ENST00000480058,ENST00000481109,ENST00000538861	PRPF4B.aAug10,PRPF4B.bAug10,PRPF4B.cAug10,PRPF4B.dAug10	uc003mvv.2,uc003mvw.2,uc011dhv.1	2.54211	2.75955	2.49297	21.925	2.63989e-20	1.13166e-18
5:95278753:+,5:95297279:+	ELL2	core	NM_012081	ENST00000237853,ENST00000431061,ENST00000506628,ENST00000513343,ENST00000515020	ELL2.aAug10,ELL2.cAug10,ELL2.dAug10,ELL2.eAug10,ELL2.fAug10	uc003klr.3	1.76837	2.28989	3.13163	21.9236	2.64449e-20	1.1325e-18
7:92247521:+,7:92354940:+	CDK6	novel	NONE	NONE	NONE	NONE	0.526745	9.43576	-1.81003	21.9205	2.65541e-20	1.13672e-18
2:187466878:+,2:187487066:+	ITGAV	core	NM_001144999,NM_001145000,NM_002210	ENST00000261023,ENST00000374907,ENST00000433736,ENST00000544640	None	uc002upq.2,uc010frs.2,uc010zfv.1	2.28123	2.35119	2.95519	21.9181	2.66385e-20	1.13987e-18
20:48273239:+,20:48330113:+	B4GALT5	core	NM_004776	ENST00000371711	B4GALT5.aAug10	uc002xuu.3	2.18271	2.33228	2.93838	21.9109	2.68924e-20	1.14898e-18
6:163984751:+,6:163986978:+	QKI	core	NM_206853	ENST00000361758,ENST00000453779	QKI.cAug10	uc003qug.2	0.796775	4.67742	1.42147	21.8907	2.762e-20	1.17612e-18
3:48728915:+,3:48730387:+	IP6K2	core	NM_001005909,NM_016291	ENST00000328631,ENST00000479914,ENST00000491686	IP6K2.aAug10,IP6K2.bAug10,IP6K2.cAug10,IP6K2.dAug10,IP6K2.eAug10,IP6K2.fAug10,IP6K2.gAug10	uc003cup.2,uc003cuq.2	0.338302	2.48084	2.52971	21.8787	2.806e-20	1.19245e-18
1:150300925:+,1:150305155:+	PRPF3	core	NM_004698	ENST00000324862,ENST00000467329,ENST00000496202,ENST00000543398	PRPF3.aAug10,PRPF3.bAug10,PRPF3.dAug10,PRPF3.eAug10,PRPF3.fAug10	uc001eum.3,uc009wlp.2,uc010pca.1	2.44204	2.72687	2.54283	21.8612	2.8716e-20	1.21737e-18
3:178743013:+,3:178745211:+	ZMAT3	core	NM_152240	ENST00000432729	ZMAT3.cAug10	uc003fji.2,uc010hxa.2	3.48829	3.76542	1.78643	21.8354	2.97142e-20	1.25514e-18
5:135394903:+,5:135396523:+	TGFBI	core	NM_000358	ENST00000305126,ENST00000398813,ENST00000442011,ENST00000503087,ENST00000504205,ENST00000506699,ENST00000507018,ENST00000508076,ENST00000513497,ENST00000514554	TGFBI.aAug10,TGFBI.bAug10,TGFBI.cAug10,TGFBI.dAug10,TGFBI.eAug10,TGFBI.gAug10,TGFBI.iAug10,TGFBI.jAug10,TGFBI.lAug10,TGFBI.oAug10	uc003lbf.3,uc003lbg.3,uc003lbh.3,uc010jed.2,uc011cyb.1	2.29582	2.54753	2.75482	21.835	2.97293e-20	1.25528e-18
1:100525561:+,1:100527391:+	HIAT1	core	NM_033055	ENST00000370152,ENST00000421661	HIAT1.aAug10,HIAT1.dAug10	uc001dst.2	1.6535	2.27254	2.9949	21.8267	3.00582e-20	1.26699e-18
9:82319817:+,9:82323033:+	TLE4	extended	None	ENST00000376544,ENST00000467142	TLE4.fAug10	uc010mps.2	0.699885	9.42279	-1.81588	21.8264	3.00708e-20	1.26699e-18
2:88874964:+,2:88876072:+	EIF2AK3	core	NM_004836	ENST00000303236,ENST00000415570,ENST00000419748,ENST00000478003,ENST00000535951	EIF2AK3.aAug10,EIF2AK3.bAug10,EIF2AK3.cAug10,EIF2AK3.eAug10	uc002stc.3	2.82567	2.90422	2.24374	21.8259	3.00911e-20	1.26699e-18
5:55264224:+,5:55265378:+	IL6ST	core	NM_001190981,NM_002184,NM_175767	ENST00000336909,ENST00000381287,ENST00000381294,ENST00000381298,ENST00000502326,ENST00000503773,ENST00000522633,ENST00000536319,ENST00000542298	IL6ST.aAug10,IL6ST.bAug10,IL6ST.cAug10,IL6ST.dAug10	uc003jqq.2,uc003jqr.2,uc010iwb.2,uc011cqk.1	1.90077	2.02378	3.95986	21.8248	3.01348e-20	1.26782e-18
12:109046193:+,12:109052514:+	CORO1C	novel	NONE	NONE	NONE	NONE	0.760594	9.5798	-1.73787	21.8231	3.01994e-20	1.27003e-18
20:48263615:+,20:48273105:+	B4GALT5	core	NM_004776	ENST00000371711	B4GALT5.aAug10,B4GALT5.bAug10,B4GALT5.gAug10	uc002xuu.3	2.18271	2.0025	3.35471	21.8024	3.10409e-20	1.30385e-18
1:40737707:+,1:40747015:+	ZMPSTE24	core	NM_005857	ENST00000372759	ZMPSTE24.aAug10	uc001cfg.2	2.05043	2.0631	3.19833	21.8013	3.10864e-20	1.30525e-18
10:116595400:+,10:116595883:+	FAM160B1	core	NM_001135051,NM_020940	ENST00000369248,ENST00000369250	FAM160B1andRPL15P13.aAug10,FAM160B1andRPL15P13.bAug10	uc001lcb.2,uc001lcc.2	3.41984	3.37378	2.11105	21.7959	3.13084e-20	1.31299e-18
8:64081460:+,8:64081946:+	YTHDF3	core	NM_152758	ENST00000517371,ENST00000518438,ENST00000518763,ENST00000519428,ENST00000521674,ENST00000522282,ENST00000523455,ENST00000524135,ENST00000539294,ENST00000542911	YTHDF3.bAug10,YTHDF3.cAug10,YTHDF3.fAug10,YTHDF3.gAug10,YTHDF3.hAug10,YTHDF3.iAug10,YTHDF3.kAug10,YTHDF3.mAug10	uc003xuy.2,uc010lys.2	1.98857	2.0615	3.22416	21.7857	3.17361e-20	1.32851e-18
18:48575230:+,18:48581151:+	SMAD4	novel	NONE	NONE	NONE	NONE	0.998169	9.52622	-1.76366	21.7799	3.19814e-20	1.33654e-18
10:116615099:+,10:116620508:+	FAM160B1	core	NM_001135051,NM_020940	ENST00000369248,ENST00000369250	FAM160B1andRPL15P13.aAug10,FAM160B1andRPL15P13.bAug10	uc001lcb.2,uc001lcc.2	3.41984	3.43806	2.17303	21.7798	3.19843e-20	1.33654e-18
3:194158193:+,3:194159585:+	ATP13A3	novel	NONE	NONE	NONE	NONE	1.71466	9.67888	-1.68864	21.7546	3.30734e-20	1.3755e-18
11:47767946:+,11:47772468:+	FNBP4	core	NM_015308	ENST00000263773,ENST00000534003	FNBP4.aAug10,FNBP4.bAug10,FNBP4.cAug10,FNBP4.eAug10	uc001ngj.2,uc001ngl.2,uc009ylv.2	2.14053	2.03978	3.0386	21.7479	3.33679e-20	1.3861e-18
17:1564121:+,17:1564565:+	PRPF8	novel	NONE	NONE	NONE	NONE	0.540489	9.43973	-1.80824	21.7284	3.42425e-20	1.41963e-18
14:51716287:+,14:51721059:+	TMX1	novel	NONE	NONE	NONE	NONE	0.692268	9.5061	-1.77526	21.7239	3.44465e-20	1.42753e-18
3:98531326:+,3:98536613:+	DCBLD2	core	NM_080927	ENST00000326840,ENST00000326857,ENST00000404023,ENST00000460008,ENST00000479144	DCBLD2.aAug10,DCBLD2.bAug10,DCBLD2.cAug10,DCBLD2.dAug10,DCBLD2.iAug10	uc003dtd.2,uc003dte.2	1.72303	2.10308	3.22111	21.7093	3.51233e-20	1.45329e-18
11:47765715:+,11:47767608:+	FNBP4	core	NM_015308	ENST00000263773,ENST00000534003,ENST00000544590	FNBP4.aAug10,FNBP4.bAug10,FNBP4.cAug10,FNBP4.eAug10,FNBP4.gAug10	uc001ngj.2,uc001ngl.2,uc009ylv.2	2.14053	2.16578	2.89268	21.708	3.51813e-20	1.45468e-18
6:160208903:+,6:160210437:+	TCP1	core	NM_001008897	ENST00000392168,ENST00000538128,ENST00000544255	TCP1andSNORA29andSNORA20.bAug10,TCP1andSNORA29andSNORA20.dAug10,TCP1andSNORA29andSNORA20.gAug10,TCP1andSNORA29andSNORA20.iAug10	uc003qss.2,uc003qst.2	0.5866	5.65691	1.37784	21.708	3.51846e-20	1.45468e-18
3:156413814:+,3:156421213:+	TIPARP	core	NM_001184717,NM_001184718,NM_015508	ENST00000295924,ENST00000461166,ENST00000473702,ENST00000481853,ENST00000486483,ENST00000495891,ENST00000542783	TIPARP.aAug10,TIPARP.bAug10,TIPARP.cAug10,TIPARP.dAug10,TIPARP.eAug10	uc003fav.2,uc003faw.2	2.02256	2.1479	3.14068	21.7069	3.52354e-20	1.45621e-18
2:180851532:+,2:180853304:+	CWC22	core	NM_020943	ENST00000295749,ENST00000404136,ENST00000410053	CWC22andZNF385B.aAug10,CWC22andZNF385B.bAug10,CWC22andZNF385B.hAug10	uc002unp.2,uc010frh.1	1.95703	2.26475	2.70275	21.7036	3.53882e-20	1.4608e-18
5:60817269:+,5:60821627:+	ZSWIM6	core	NM_020928	ENST00000252744	ZSWIM6.aAug10	uc003jsr.2	2.05337	2.5385	2.51842	21.6975	3.56764e-20	1.47097e-18
10:60148579:+,10:60154118:+	TFAM	extended	None	ENST00000373895	TFAM.cAug10	uc001jkh.2	1.11115	4.05553	1.73613	21.6909	3.5991e-20	1.48195e-18
7:17369699:+,7:17370380:+	AHR	core	NM_001621	ENST00000242057,ENST00000463496,ENST00000475440	AHR.aAug10,AHR.bAug10,AHR.fAug10	uc003stt.3,uc011jxz.1	2.56517	2.63094	2.79609	21.6908	3.59992e-20	1.48195e-18
19:47342835:+,19:47354021:+	AP2S1	extended	None	None	AP2S1.jAug10	None	1.16248	3.12436	2.28377	21.6768	3.6674e-20	1.5062e-18
6:4059048:+,6:4060647:+	PRPF4B	core	NM_003913	ENST00000337659,ENST00000463634,ENST00000480058,ENST00000481109,ENST00000494674,ENST00000538861	PRPF4B.aAug10,PRPF4B.bAug10,PRPF4B.cAug10,PRPF4B.dAug10,PRPF4B.kAug10,PRPF4B.mAug10	uc003mvv.2,uc003mvw.2,uc011dhv.1	2.54211	2.20686	3.01317	21.667	3.7158e-20	1.5231e-18
20:17937681:+,20:17941783:+	SNX5	extended	None	ENST00000475716,ENST00000483485	OVOL2andSNX5andSNORD17.eAug10,OVOL2andSNX5andSNORD17.mAug10,OVOL2andSNX5andSNORD17.oAug10	uc002wqb.2	-0.330517	2.23375	3.04579	21.6643	3.72914e-20	1.52798e-18
19:10787986:+,19:10789773:+	ILF3	extended	None	None	ILF3.jAug10,ILF3.mAug10	None	0.00638169	3.71377	1.73447	21.6499	3.80113e-20	1.55444e-18
17:48274649:+,17:48275093:+	COL1A1	novel	NONE	NONE	NONE	NONE	1.20806	7.69368	1.07662	21.6479	3.81143e-20	1.55745e-18
20:13782329:+,20:13789488:+	C20orf7	core	NM_001039375,NM_024120,NR_029377	ENST00000378081,ENST00000378106,ENST00000463598,ENST00000464269,ENST00000475968,ENST00000476536,ENST00000479716,ENST00000481249,ENST00000485738,ENST00000536501	C20orf7.aAug10,C20orf7.bAug10,C20orf7.cAug10,C20orf7.eAug10,C20orf7.fAug10,C20orf7.gAug10,C20orf7.hAug10,C20orf7.iAug10,C20orf7.nAug10	uc002wom.2,uc002won.2,uc002woo.2	1.39697	2.42376	2.83587	21.6315	3.8955e-20	1.58872e-18
2:197028151:+,2:197036057:+	STK17B	core	NM_004226	ENST00000263955	STK17B.bAug10	uc002utk.2	2.49976	2.39554	2.75094	21.6306	3.90016e-20	1.58958e-18
10:7844388:+,10:7849622:+	ATP5C1	novel	NONE	NONE	NONE	NONE	0.539867	9.68714	-1.68363	21.6306	3.90064e-20	1.58958e-18
11:47758292:+,11:47765505:+	FNBP4	core	NM_015308	ENST00000263773,ENST00000527894,ENST00000528388,ENST00000534003	FNBP4.aAug10,FNBP4.bAug10,FNBP4.cAug10,FNBP4.dAug10,FNBP4.hAug10,FNBP4.jAug10	uc001ngj.2,uc001ngl.2,uc009ylv.2	2.14053	2.21463	2.93124	21.6262	3.92341e-20	1.597e-18
2:231949828:+,2:232010954:+	PSMD1	novel	NONE	NONE	NONE	NONE	0.543293	9.3099	-1.873	21.6232	3.9391e-20	1.60215e-18
14:102548158:+,14:102549371:+	HSP90AA1	novel	NONE	NONE	NONE	NONE	0.740214	7.20569	1.0561	21.619	3.96145e-20	1.61e-18
6:28872442:+,6:28887789:+	TRIM27	novel	NONE	NONE	NONE	NONE	-1.01783	9.26237	-1.89619	21.6131	3.99237e-20	1.62194e-18
14:59107586:+,14:59108310:+	DACT1	core	NM_001079520,NM_016651,NR_046093,NR_046095	ENST00000335867,ENST00000395153,ENST00000421793,ENST00000541264,ENST00000555845,ENST00000556859	DACT1.aAug10,DACT1.bAug10,DACT1.cAug10,DACT1.dAug10,DACT1.eAug10	uc001xdw.2,uc001xdx.2,uc010trv.1,uc010trw.1	2.93007	3.07765	2.00467	21.6113	4.00208e-20	1.62525e-18
12:69044248:+,12:69050086:+	RAP1B	novel	NONE	NONE	NONE	NONE	2.15265	9.40599	-1.8246	21.5987	4.06998e-20	1.64837e-18
1:40734207:+,1:40735647:+	ZMPSTE24	core	NM_005857	ENST00000372759	ZMPSTE24.aAug10	uc001cfg.2	2.05043	2.00104	3.40563	21.5976	4.07579e-20	1.65009e-18
14:67812588:+,14:67815754:+	ATP6V1D	novel	NONE	NONE	NONE	NONE	1.11385	9.85866	-1.59939	21.5909	4.11266e-20	1.66374e-18
19:49119459:+,19:49120573:+	RPL18	novel	NONE	NONE	NONE	NONE	1.20148	7.33086	1.32236	21.5654	4.25557e-20	1.71891e-18
6:41062236:+,6:41065096:+	NFYA	core	NM_002505,NM_021705	ENST00000341376,ENST00000353205	NFYA.bAug10,NFYA.cAug10,NFYA.dAug10,NFYA.mAug10	uc003opo.2,uc003opp.2,uc003opq.2	2.62712	2.65415	2.51414	21.5595	4.28919e-20	1.73116e-18
6:117997248:+,6:118014205:+	NUS1	core	NM_138459	ENST00000368494	NUS1.aAug10,NUS1.bAug10,NUS1.eAug10	uc003pxw.2	1.10441	2.0816	2.93157	21.5513	4.33651e-20	1.74758e-18
17:5336735:+,17:5341443:+	C1QBP	novel	NONE	NONE	NONE	NONE	0.484834	9.73242	-1.6623	21.543	4.38498e-20	1.76253e-18
11:57529518:+,11:57563049:+	CTNND1,TMX2-CTNND1	core	NM_001085469	ENST00000532245	TMX2andC11orf31andCTNND1.uAug10	uc001nlw.3	0.949708	5.02148	1.55882	21.5391	4.40756e-20	1.77011e-18
2:88890123:+,2:88890336:+	EIF2AK3	core	NM_004836	ENST00000303236,ENST00000415570,ENST00000419748,ENST00000535951	EIF2AK3.aAug10,EIF2AK3.bAug10,EIF2AK3.cAug10	uc002stc.3	2.82567	3.036	1.91673	21.5262	4.4848e-20	1.79975e-18
2:170487497:+,2:170488276:+	PPIG	core	NM_004792	ENST00000260970,ENST00000409714,ENST00000448752,ENST00000462903,ENST00000530133	PPIG.aAug10,PPIG.bAug10,PPIG.eAug10	uc002uez.2,uc002ufa.2,uc002ufb.2,uc010fpx.2	1.97704	2.10512	2.94328	21.516	4.54609e-20	1.82157e-18
12:133324606:+,12:133324724:+	ANKLE2	core	NM_015114	ENST00000337516,ENST00000357997,ENST00000539605,ENST00000545623,ENST00000546061	ANKLE2.aAug10,ANKLE2.bAug10,ANKLE2.dAug10,ANKLE2.kAug10,ANKLE2.lAug10	uc001ukx.2,uc001uky.3	1.37562	2.17082	2.90115	21.5154	4.54973e-20	1.82233e-18
7:48134424:+,7:48146470:+	UPP1	extended	None	ENST00000395560,ENST00000417464,ENST00000429491,ENST00000457596	UPP1.eAug10,UPP1.fAug10,UPP1.gAug10,UPP1.tAug10	uc003ton.2,uc003too.2	0.166317	2.15539	3.06798	21.5117	4.5724e-20	1.82933e-18
13:23930146:+,13:23939305:+	SACS	extended	None	None	SACS.hAug10	None	1.71211	5.49554	1.42534	21.5103	4.58131e-20	1.83219e-18
12:69237582:+,12:69237652:+	MDM2	novel	NONE	NONE	NONE	NONE	2.96722	3.05685	2.3262	21.4998	4.64623e-20	1.85604e-18
2:189857666:+,2:189858764:+	COL3A1	extended	None	ENST00000450867	COL3A1.fAug10	uc010frw.1	1.02139	5.33418	1.51067	21.4915	4.69813e-20	1.87501e-18
12:69203072:+,12:69218335:+	MDM2	novel	NONE	NONE	NONE	NONE	2.96722	9.98793	-1.5347	21.4791	4.77671e-20	1.90167e-18
6:4041161:+,6:4042721:+	PRPF4B	core	NM_003913	ENST00000337659,ENST00000463634,ENST00000480058,ENST00000481109,ENST00000490399,ENST00000538861	PRPF4B.aAug10,PRPF4B.bAug10,PRPF4B.cAug10,PRPF4B.dAug10,PRPF4B.eAug10	uc003mvv.2,uc003mvw.2,uc011dhv.1	2.54211	2.65402	2.49922	21.472	4.82238e-20	1.91405e-18
3:87018273:+,3:87027676:+	VGLL3	core	NM_016206	ENST00000383698,ENST00000398399,ENST00000494229	VGLL3.aAug10,VGLL3.bAug10,VGLL3.cAug10	uc003dqn.2	2.25749	2.26663	3.30042	21.4656	4.86438e-20	1.92854e-18
18:55273202:+,18:55274676:+	NARS	novel	NONE	NONE	NONE	NONE	-0.103928	9.52394	-1.76585	21.4502	4.96569e-20	1.96575e-18
11:47753113:+,11:47754089:+	FNBP4	core	NM_015308	ENST00000263773,ENST00000525792	FNBP4.aAug10,FNBP4.bAug10,FNBP4.gAug10,FNBP4.kAug10	uc001ngj.2,uc009ylv.2	2.14053	2.67827	2.41625	21.4469	4.98794e-20	1.97381e-18
2:187528562:+,2:187529221:+	ITGAV	core	NM_001144999,NM_001145000,NM_002210	ENST00000261023,ENST00000374907,ENST00000433736	ITGAV.aAug10,ITGAV.bAug10,ITGAV.dAug10	uc002upq.2,uc010frs.2,uc010zfv.1	2.28123	2.29961	3.13989	21.4438	5.00866e-20	1.98126e-18
19:56884992:+,19:56888236:+	ZNF542	core	NR_024055,NR_024057	ENST00000462524,ENST00000468396,ENST00000495307	ZNF542.dAug10,ZNF542.eAug10,ZNF542.iAug10,ZNF542.kAug10,ZNF542.pAug10	uc010etk.2,uc010ygj.1	1.06241	2.58976	2.59292	21.4345	5.07194e-20	2.00253e-18
12:58143100:+,12:58145958:+	CDK4	novel	NONE	NONE	NONE	NONE	-0.0142289	10.5416	-1.2577	21.4253	5.13476e-20	2.02278e-18
3:73110211:+,3:73114003:+	PPP4R2	novel	NONE	NONE	NONE	NONE	0.771971	9.50193	-1.77738	21.4228	5.15241e-20	2.02776e-18
12:59272887:+,12:59274363:+	LRIG3	core	NM_001136051,NM_153377	ENST00000320743,ENST00000379141	LRIG3.aAug10,LRIG3.bAug10,LRIG3.cAug10,LRIG3.dAug10	uc001sqr.2,uc009zqh.2	2.08927	2.42645	2.8235	21.4227	5.15318e-20	2.02776e-18
3:194176691:+,3:194180200:+	ATP13A3	novel	NONE	NONE	NONE	NONE	1.71466	4.29509	1.51124	21.4099	5.24243e-20	2.0598e-18
7:156743418:+,7:156745168:+	NOM1	core	NM_138400	ENST00000275820	NOM1.aAug10,NOM1.cAug10	uc003wmy.2	0.17583	2.21705	3.15368	21.4085	5.25268e-20	2.06306e-18
10:61566836:+,10:61572393:+	CCDC6	core	NM_005436	ENST00000263102,ENST00000518638	CCDC6.aAug10,CCDC6.bAug10,CCDC6.eAug10,CCDC6.fAug10	uc001jks.3	1.81281	2.19979	2.78915	21.3946	5.35167e-20	2.09724e-18
12:69237044:+,12:69237521:+	MDM2	extended	None	ENST00000544125	MDM2.vbAug10	None	2.96722	3.02623	2.45143	21.3932	5.36189e-20	2.10046e-18
14:73572789:+,14:73574534:+	RBM25	novel	NONE	NONE	NONE	NONE	2.1353	10.2937	-1.3819	21.3857	5.41641e-20	2.11945e-18
7:151168527:+,7:151174419:+	RHEB	novel	NONE	NONE	NONE	NONE	0.822918	9.24662	-1.90394	21.3739	5.50295e-20	2.14932e-18
8:64081970:+,8:64087890:+	YTHDF3	core	NM_152758	ENST00000339066,ENST00000517371,ENST00000519428,ENST00000520640,ENST00000521547,ENST00000521674,ENST00000539294,ENST00000542911	YTHDF3.dAug10,YTHDF3.eAug10,YTHDF3.fAug10,YTHDF3.hAug10,YTHDF3.iAug10	uc003xuy.2,uc003xuz.2,uc003xva.2	1.98857	2.08155	3.42244	21.3578	5.62356e-20	2.19236e-18
13:31196029:+,13:31204972:+	USPL1	core	NM_005800	ENST00000255304,ENST00000465952	USPL1.aAug10,USPL1.dAug10,USPL1.eAug10,USPL1.fAug10,USPL1.gAug10,USPL1.qAug10	uc001utb.2,uc001utc.2	2.88417	2.773	2.31627	21.3567	5.63194e-20	2.19383e-18
2:128087584:+,2:128093446:+	MAP3K2	novel	NONE	NONE	NONE	NONE	2.72744	9.30539	-1.87546	21.3499	5.68419e-20	2.21108e-18
11:118627996:+,11:118630631:+	DDX6	novel	NONE	NONE	NONE	NONE	1.93343	9.19061	-1.93216	21.3491	5.69037e-20	2.21266e-18
19:48828867:+,19:48832609:+	EMP3	extended	None	None	EMP3.dAug10	None	0.335463	4.26943	1.81641	21.3452	5.72004e-20	2.22256e-18
20:3104052:+,20:3140412:+	FASTKD5,UBOX5	core	NM_014948,NM_199415	ENST00000217173,ENST00000348031	UBOX5andFASTKD5.cAug10,UBOX5andFASTKD5.dAug10,UBOX5andFASTKD5.eAug10	uc002whw.2,uc002whx.2,uc002why.1	1.20232	3.05249	2.22793	21.3402	5.75916e-20	2.23611e-18
2:198400354:+,2:198405075:+	MOBKL3	novel	NONE	NONE	NONE	NONE	-0.343866	9.29428	-1.88083	21.3283	5.85199e-20	2.26797e-18
5:56531859:+,5:56542127:+	GPBP1	core	NM_001127235,NM_001127236,NM_001203246,NM_022913	ENST00000264779,ENST00000506184,ENST00000511209,ENST00000514387,ENST00000538707	GPBP1.bAug10,GPBP1.cAug10,GPBP1.dAug10,GPBP1.eAug10	uc003jrh.3,uc003jri.3,uc003jrj.3,uc003jrk.3	0.752482	2.33664	2.69969	21.3133	5.97244e-20	2.31138e-18
5:5436589:+,5:5437193:+	KIAA0947	core	NM_015325	ENST00000296564,ENST00000505464,ENST00000512608	KIAA0947.cAug10,KIAA0947.fAug10	uc003jdm.3	1.49855	3.27263	2.06009	21.3132	5.9728e-20	2.31138e-18
7:17349747:+,7:17362125:+	AHR	core	NM_001621	ENST00000242057,ENST00000463496	AHR.aAug10,AHR.bAug10,AHR.cAug10	uc003stt.3,uc011jxz.1	2.56517	2.53529	2.68295	21.2938	6.13133e-20	2.36602e-18
8:103226386:+,8:103231042:+	RRM2B	core	NM_001172477,NM_001172478,NM_015713	ENST00000251810,ENST00000395912,ENST00000519125,ENST00000522368,ENST00000535248	RRM2B.aAug10,RRM2B.bAug10,RRM2B.cAug10,RRM2B.dAug10,RRM2B.eAug10,RRM2B.fAug10,RRM2B.iAug10	uc003ykn.2,uc003yko.2,uc010mbv.1	2.42751	2.15613	2.9155	21.2777	6.26666e-20	2.41621e-18
6:4056669:+,6:4057270:+	PRPF4B	core	NM_003913	ENST00000337659,ENST00000480058,ENST00000481109,ENST00000538861	PRPF4B.aAug10,PRPF4B.bAug10,PRPF4B.cAug10,PRPF4B.dAug10,PRPF4B.mAug10	uc003mvv.2,uc003mvw.2,uc011dhv.1	2.54211	2.46275	2.58683	21.2598	6.42017e-20	2.46816e-18
1:226176089:+,1:226178944:+	C1orf55	core	NM_152608	ENST00000272091,ENST00000366817,ENST00000366818	C1orf55.aAug10,C1orf55.bAug10,C1orf55.dAug10	uc001hpu.3,uc001hpv.2	2.4739	2.47086	2.62245	21.2522	6.48688e-20	2.49199e-18
2:27663375:+,2:27663672:+	NRBP1	novel	NONE	NONE	NONE	NONE	0.14414	9.16865	-1.94376	21.2447	6.55289e-20	2.51551e-18
1:144906196:+,1:144909869:+	PDE4DIP	novel	NONE	NONE	NONE	NONE	-0.0331121	9.35936	-1.84744	21.2358	6.63235e-20	2.54045e-18
5:34923339:+,5:34925331:+	BRIX1	novel	NONE	NONE	NONE	NONE	1.85648	9.29916	-1.87879	21.2332	6.65597e-20	2.54682e-18
1:16464680:+,1:16464770:+	EPHA2	core	NM_004431	ENST00000358432,ENST00000480202	EPHA2.aAug10,EPHA2.bAug10,EPHA2.dAug10,EPHA2.eAug10	uc001aya.1,uc010oca.1	1.80946	2.48966	2.6289	21.2236	6.74312e-20	2.57725e-18
6:4050113:+,6:4052191:+	PRPF4B	core	NM_003913	ENST00000337659,ENST00000463634,ENST00000480058,ENST00000481109,ENST00000538861	PRPF4B.aAug10,PRPF4B.bAug10,PRPF4B.cAug10,PRPF4B.dAug10,PRPF4B.gAug10	uc003mvv.2,uc003mvw.2,uc011dhv.1	2.54211	2.44478	2.69829	21.2203	6.77353e-20	2.58606e-18
1:100533751:+,1:100542721:+	HIAT1	novel	NONE	NONE	NONE	NONE	1.6535	9.22845	-1.91249	21.2189	6.78665e-20	2.58825e-18
8:23299236:+,8:23301363:+	ENTPD4	novel	NONE	NONE	NONE	NONE	0.418287	9.4521	-1.80153	21.2153	6.81921e-20	2.59784e-18
2:191839658:+,2:191841566:+	STAT1	novel	NONE	NONE	NONE	NONE	-0.0707502	9.56061	-1.74701	21.213	6.84119e-20	2.60473e-18
1:109238816:+,1:109238899:+	PRPF38B	core	NM_018061,NR_037185	ENST00000370021,ENST00000370022,ENST00000370025,ENST00000467302	PRPF38B.aAug10,PRPF38B.bAug10,PRPF38B.cAug10,PRPF38B.eAug10,PRPF38B.gAug10,PRPF38B.hAug10,PRPF38B.jAug10,PRPF38B.kAug10,PRPF38B.lAug10	uc001dvv.3,uc001dvw.3,uc010ouz.1	2.4139	2.29334	2.92234	21.2076	6.89102e-20	2.62046e-18
7:121004242:+,7:121011354:+	FAM3C	core	NM_001040020,NM_014888	ENST00000359943,ENST00000412653,ENST00000426156	FAM3C.aAug10,FAM3C.bAug10,FAM3C.cAug10,FAM3C.dAug10	uc003vjx.2,uc010lkm.2	1.13459	2.40567	2.92535	21.202	6.94366e-20	2.63666e-18
10:13642348:+,10:13647631:+	PRPF18	core	NM_003675	ENST00000320054,ENST00000378544,ENST00000378572,ENST00000417658	PRPF18.aAug10,PRPF18.bAug10,PRPF18.cAug10,PRPF18.dAug10	uc001imp.2	2.0355	2.59124	2.66649	21.1867	7.08948e-20	2.68622e-18
19:30102846:+,19:30104778:+	POP4	novel	NONE	NONE	NONE	NONE	0.37043	9.23672	-1.90892	21.1739	7.21378e-20	2.72449e-18
7:92207496:+,7:92207633:+	FAM133B,LOC728066	core	NM_001040057,NM_152789,NR_034169	ENST00000415397,ENST00000427372,ENST00000438306,ENST00000445716,ENST00000481407	FAM133B.aAug10,FAM133B.bAug10,FAM133B.cAug10,FAM133B.dAug10,FAM133B.eAug10,FAM133B.fAug10,FAM133B.gAug10,FAM133B.hAug10,FAM133B.iAug10,FAM133B.jAug10,FAM133B.lAug10,FAM133B.sAug10	uc003umb.2,uc003umc.2,uc003umd.2	2.22675	2.41071	2.55291	21.1603	7.3491e-20	2.77161e-18
12:88890958:+,12:88898936:+	KITLG	core	NM_000899,NM_003994	ENST00000228280,ENST00000347404,ENST00000357116,ENST00000378535	KITLG.aAug10,KITLG.bAug10,KITLG.cAug10,KITLG.gAug10	uc001tav.2,uc001taw.2,uc009zsn.2	3.45509	3.33468	1.96477	21.1545	7.40664e-20	2.79231e-18
11:47755681:+,11:47758168:+	FNBP4	core	NM_015308	ENST00000263773,ENST00000527894,ENST00000528388,ENST00000534003	FNBP4.aAug10,FNBP4.bAug10,FNBP4.dAug10,FNBP4.gAug10,FNBP4.hAug10,FNBP4.jAug10	uc001ngj.2,uc009ylv.2	2.14053	2.21592	2.89615	21.1518	7.43392e-20	2.79959e-18
1:16693803:+,1:16719723:+	C1orf144	core	NM_015609	ENST00000401089	C1orf144.eAug10	uc001ayi.3	-0.194516	2.16197	2.78191	21.1487	7.46603e-20	2.80967e-18
13:31216894:+,13:31221069:+	USPL1	core	NM_005800	ENST00000255304	USPL1.aAug10,USPL1.bAug10,USPL1.cAug10,USPL1.dAug10	uc001utb.2,uc001utc.2,uc001utd.2,uc001ute.1	2.88417	2.5311	2.47966	21.1466	7.4873e-20	2.81666e-18
11:118639060:+,11:118650341:+	DDX6	core	NM_004397	ENST00000264018,ENST00000526070,ENST00000534980,ENST00000545741	DDX6.aAug10,DDX6.bAug10,DDX6.cAug10,DDX6.eAug10,DDX6.iAug10	uc001pub.2,uc001puc.2	1.93343	2.13029	3.2182	21.1347	7.60897e-20	2.85835e-18
12:133324917:+,12:133327229:+	ANKLE2	core	NM_015114	ENST00000337516,ENST00000357997,ENST00000539605,ENST00000545623	ANKLE2.aAug10,ANKLE2.bAug10,ANKLE2.dAug10,ANKLE2.kAug10	uc001ukx.2,uc001uky.3	1.37562	2.20918	2.75171	21.1322	7.63546e-20	2.86595e-18
11:47772588:+,11:47772695:+	FNBP4	core	NM_015308	ENST00000263773,ENST00000534003	FNBP4.aAug10,FNBP4.bAug10,FNBP4.cAug10	uc001ngj.2,uc001ngl.2,uc009ylv.2	2.14053	2.18484	2.858	21.1319	7.63864e-20	2.86595e-18
1:150318967:+,1:150321633:+	PRPF3	core	NM_004698	ENST00000324862,ENST00000414970,ENST00000467329,ENST00000476970	PRPF3.aAug10,PRPF3.bAug10,PRPF3.cAug10,PRPF3.eAug10,PRPF3.kAug10,PRPF3.lAug10	uc001eum.3,uc010pca.1,uc010pcb.1	2.44204	2.03237	3.00204	21.1314	7.64359e-20	2.86624e-18
3:160239698:+,3:160243726:+	KPNA4	novel	NONE	NONE	NONE	NONE	1.11663	9.50977	-1.77383	21.124	7.72094e-20	2.89009e-18
14:62205091:+,14:62207473:+	HIF1A	novel	NONE	NONE	NONE	NONE	0.512859	5.62929	1.21452	21.1213	7.74954e-20	2.8977e-18
10:13639535:+,10:13642244:+	PRPF18	core	NM_003675	ENST00000320054,ENST00000378572	PRPF18.aAug10,PRPF18.bAug10	uc001imp.2	2.0355	2.39481	2.7309	21.1061	7.91121e-20	2.94977e-18
12:123238354:+,12:123247392:+	DENR	novel	NONE	NONE	NONE	NONE	0.251902	9.07386	-1.99027	21.1051	7.92247e-20	2.95292e-18
11:118778311:+,11:118778979:+	BCL9L	core	NM_182557	ENST00000334801,ENST00000392849,ENST00000431085,ENST00000526143,ENST00000526514,ENST00000527266	BCL9L.aAug10,BCL9L.bAug10,BCL9L.cAug10	uc001pug.2,uc009zal.2	1.26848	2.10802	2.98167	21.1014	7.96245e-20	2.96468e-18
1:183853044:+,1:183853857:+	RGL1	core	NM_015149	ENST00000304685,ENST00000360851,ENST00000367531,ENST00000536277,ENST00000539189,ENST00000543395	RGL1.aAug10,RGL1.bAug10,RGL1.cAug10,RGL1.dAug10,RGL1.eAug10,RGL1.gAug10,RGL1.iAug10	uc001gqm.2,uc001gqo.2,uc010pof.1,uc010pog.1,uc010poh.1,uc010poi.1	2.33894	3.25328	1.83683	21.0846	8.14634e-20	3.02779e-18
2:88892923:+,2:88894987:+	EIF2AK3	core	NM_004836	ENST00000303236,ENST00000415570,ENST00000419748,ENST00000535951	EIF2AK3.aAug10,EIF2AK3.bAug10,EIF2AK3.cAug10	uc002stc.3	2.82567	3.02543	2.09721	21.0835	8.15939e-20	3.03049e-18
16:2013257:+,16:2014450:+	RPS2	extended	None	ENST00000529806	RPS2andSNORA64andSNORA10.dAug10,RPS2andSNORA64andSNORA10.iAug10,RPS2andSNORA64andSNORA10.pAug10	None	1.01293	2.61612	2.41206	21.0767	8.23524e-20	3.05651e-18
5:139625642:+,5:139680001:+	PFDN1	extended	None	ENST00000514611	PFDN1.eAug10	uc003lfe.1	0.766359	6.45292	1.19503	21.067	8.34482e-20	3.09173e-18
14:96993876:+,14:96997812:+	PAPOLA	novel	NONE	NONE	NONE	NONE	-0.613798	9.08641	-1.98436	21.0654	8.36321e-20	3.09636e-18
11:102033302:+,11:102076624:+	YAP1	core	NM_006106	ENST00000345877,ENST00000526343	YAP1.cAug10,YAP1.dAug10	uc001pgs.2,uc001pgv.2	0.47321	3.4561	1.71517	21.0528	8.50839e-20	3.14789e-18
22:41562670:+,22:41564453:+	EP300	core	NM_001429	ENST00000263253	EP300.aAug10,EP300.cAug10	uc003azl.3	2.20621	2.20707	2.81785	21.0301	8.77631e-20	3.23677e-18
14:103958371:+,14:103969219:+	MARK3	core	NM_001128920,NM_002376	ENST00000216288,ENST00000303622,ENST00000416682,ENST00000556463,ENST00000561071	MARK3.bAug10,MARK3.dAug10,MARK3.eAug10,MARK3.tAug10	uc001ymw.3,uc001yna.3,uc010awp.2	0.227578	4.00182	1.5912	21.0235	8.8557e-20	3.26034e-18
5:133536187:+,5:133537539:+	PPP2CA	novel	NONE	NONE	NONE	NONE	1.46589	10.3603	-1.34872	21.0088	9.03524e-20	3.32295e-18
11:32622378:+,11:32623825:+	CCDC73,EIF3M	novel	NONE	NONE	NONE	NONE	0.188632	9.07274	-1.99157	20.9755	9.45745e-20	3.47095e-18
11:13438807:+,11:13441007:+	BTBD10	core	NM_032320	ENST00000278174,ENST00000525108,ENST00000525661,ENST00000525864,ENST00000528120,ENST00000530907	BTBD10.aAug10,BTBD10.bAug10,BTBD10.cAug10,BTBD10.dAug10,BTBD10.eAug10,BTBD10.fAug10,BTBD10.gAug10,BTBD10.iAug10,BTBD10.mAug10,BTBD10.nAug10	uc001mkz.2,uc001mla.2,uc009ygn.2,uc009ygo.2,uc010rcl.1,uc010rcm.1,uc010rcn.1	1.1058	2.25162	2.6394	20.9653	9.59001e-20	3.51838e-18
12:69965214:+,12:69967785:+	FRS2	novel	NONE	NONE	NONE	NONE	1.09463	5.43402	1.68046	20.9602	9.65836e-20	3.54222e-18
13:79894845:+,13:79896484:+	RBM26	core	NM_022118	ENST00000267229,ENST00000327303,ENST00000438724,ENST00000438737,ENST00000484573	RBM26.aAug10,RBM26.bAug10,RBM26.cAug10,RBM26.dAug10,RBM26.pAug10	uc001vkx.2,uc001vky.2,uc001vkz.2,uc001vla.2	2.32617	2.03092	3.15765	20.9572	9.69785e-20	3.55298e-18
12:133327435:+,12:133331261:+	ANKLE2	core	NM_015114	ENST00000337516,ENST00000357997,ENST00000539605	ANKLE2.aAug10,ANKLE2.bAug10,ANKLE2.dAug10,ANKLE2.eAug10	uc001ukx.2,uc001uky.3	1.37562	2.21735	2.8025	20.9508	9.78284e-20	3.58163e-18
2:187531510:+,2:187531877:+	ITGAV	core	NM_001144999,NM_001145000,NM_002210	ENST00000261023,ENST00000374907,ENST00000433736,ENST00000460641	ITGAV.aAug10,ITGAV.bAug10,ITGAV.dAug10	uc002upq.2,uc010frs.2,uc010zfv.1	2.28123	2.24454	3.65251	20.9442	9.87237e-20	3.61064e-18
2:189929381:+,2:189931116:+	COL5A2	novel	NONE	NONE	NONE	NONE	1.2239	5.53946	1.16512	20.9439	9.87651e-20	3.6109e-18
6:86350282:+,6:86352515:+	SYNCRIP	core	NM_001159673,NM_001253771	None	SYNCRIP.eAug10,SYNCRIP.gAug10,SYNCRIP.iAug10	uc003pkx.2,uc003pky.2	1.09327	2.19032	2.89122	20.9402	9.92704e-20	3.62434e-18
7:92210917:+,7:92219582:+	FAM133B,LOC728066	core	NM_152789,NR_034169	ENST00000415397,ENST00000445716,ENST00000480397,ENST00000481407	FAM133B.aAug10,FAM133B.dAug10,FAM133B.eAug10,FAM133B.fAug10,FAM133B.gAug10,FAM133B.hAug10,FAM133B.iAug10,FAM133B.jAug10,FAM133B.mAug10,FAM133B.nAug10,FAM133B.sAug10	uc003umc.2,uc003umd.2	2.22675	2.82028	2.81772	20.9395	9.93609e-20	3.62638e-18
1:16458365:+,1:16458559:+	EPHA2	core	NM_004431	ENST00000358432	EPHA2.aAug10	uc001aya.1	1.80946	2.46446	2.65724	20.9378	9.95939e-20	3.63362e-18
5:138994359:+,5:139002953:+	UBE2D2	novel	NONE	NONE	NONE	NONE	-0.0524743	9.12333	-1.96642	20.9296	1.00719e-19	3.6683e-18
1:150294041:+,1:150297353:+	PRPF3	core	NM_004698	ENST00000324862,ENST00000414970,ENST00000496202,ENST00000543398	PRPF3.aAug10,PRPF3.cAug10,PRPF3.dAug10,PRPF3.eAug10,PRPF3.fAug10,PRPF3.gAug10,PRPF3.hAug10	uc001eum.3,uc009wlo.2,uc009wlp.2,uc010pcb.1	2.44204	2.67073	2.22963	20.9265	1.0115e-19	3.68145e-18
12:12975666:+,12:12977474:+	DDX47	novel	NONE	NONE	NONE	NONE	1.69437	9.34607	-1.8556	20.9244	1.01449e-19	3.69106e-18
1:16693803:+,1:16719726:+	C1orf144	extended	None	ENST00000375590,ENST00000492354	C1orf144.aAug10,C1orf144.fAug10	uc001ayk.3,uc010ocb.1	-0.194516	2.2609	2.61524	20.921	1.01911e-19	3.70327e-18
13:31227442:+,13:31231611:+	USPL1	core	NM_005800	ENST00000255304	USPL1.aAug10,USPL1.bAug10,USPL1.cAug10	uc001utc.2,uc001utd.2,uc001ute.1	2.88417	2.58484	2.29187	20.9164	1.0256e-19	3.72246e-18
1:226180268:+,1:226180592:+	C1orf55	core	NM_152608	ENST00000272091,ENST00000366818	C1orf55.aAug10,C1orf55.bAug10	uc001hpu.3,uc001hpv.2	2.4739	2.76763	2.08432	20.9075	1.03827e-19	3.76129e-18
3:86996217:+,3:87017740:+	VGLL3	core	NM_016206	ENST00000398399	VGLL3.aAug10	uc003dqn.2	2.25749	2.09992	4.0523	20.8914	1.06151e-19	3.83694e-18
20:60881376:+,20:60882427:+	ADRM1	novel	NONE	NONE	NONE	NONE	-0.231057	8.98864	-2.03346	20.8666	1.09831e-19	3.95772e-18
7:17375410:+,7:17378610:+	AHR	core	NM_001621	ENST00000242057,ENST00000463496,ENST00000492120	AHR.aAug10,AHR.bAug10	uc003stt.3,uc011jxz.1	2.56517	2.45141	2.81453	20.866	1.09929e-19	3.95988e-18
13:79932568:+,13:79933710:+	RBM26	core	NM_022118	ENST00000267229,ENST00000327303,ENST00000438724,ENST00000438737,ENST00000484573	RBM26.aAug10,RBM26.bAug10,RBM26.cAug10,RBM26.dAug10,RBM26.eAug10,RBM26.fAug10,RBM26.gAug10	uc001vkx.2,uc001vky.2,uc001vkz.2,uc001vla.2	2.32617	2.46402	2.81252	20.8597	1.10888e-19	3.98762e-18
2:192546743:+,2:192548455:+	OBFC2A	core	NM_001031716,NM_001254736	ENST00000409510,ENST00000410026,ENST00000425611,ENST00000435931	OBFC2A.aAug10,OBFC2A.bAug10,OBFC2A.eAug10,OBFC2A.gAug10,OBFC2A.hAug10,OBFC2A.jAug10	uc002usw.2,uc002usx.2,uc002uta.2	2.28345	3.24356	1.72762	20.8594	1.10933e-19	3.98785e-18
14:103800597:+,14:103801990:+	EIF5	extended	None	ENST00000560338	EIF5andSNORA28.iAug10,EIF5andSNORA28.jAug10	uc001ymr.2	0.0219322	2.94771	1.94927	20.8378	1.14282e-19	4.10267e-18
11:32605475:+,11:32610558:+	EIF3M	novel	NONE	NONE	NONE	NONE	-0.152716	8.93952	-2.05799	20.8329	1.15048e-19	4.12594e-18
5:137903250:+,5:137904614:+	HSPA9	novel	NONE	NONE	NONE	NONE	-0.751461	9.57583	-1.74095	20.8304	1.15458e-19	4.1392e-18
10:116581882:+,10:116590611:+	FAM160B1	core	NM_001135051,NM_020940	ENST00000369246,ENST00000369248,ENST00000369250	FAM160B1andRPL15P13.aAug10,FAM160B1andRPL15P13.bAug10	uc001lcb.2,uc001lcc.2	3.41984	3.59444	1.59644	20.805	1.19566e-19	4.26607e-18
11:47746330:+,11:47752926:+	FNBP4	core	NM_015308	ENST00000263773,ENST00000531394	FNBP4.aAug10,FNBP4.bAug10,FNBP4.cAug10,FNBP4.nAug10,FNBP4.qAug10	uc001ngj.2,uc001ngl.2,uc009ylv.2	2.14053	3.52226	1.72077	20.7984	1.20668e-19	4.29963e-18
1:183891470:+,1:183895239:+	RGL1	core	NM_015149	ENST00000304685,ENST00000360851,ENST00000367531,ENST00000536277,ENST00000539189	RGL1.aAug10,RGL1.bAug10,RGL1.cAug10,RGL1.dAug10,RGL1.eAug10	uc001gqm.2,uc001gqo.2,uc010pog.1,uc010poh.1,uc010poi.1	2.33894	2.72757	2.38241	20.7917	1.21784e-19	4.33793e-18
8:98703416:+,8:98718854:+	MTDH	extended	None	ENST00000519934	MTDH.bAug10,MTDH.cAug10	uc010mbf.2	0.361424	3.77897	1.71556	20.7895	1.22155e-19	4.34967e-18
13:79939853:+,13:79940190:+	RBM26	core	NM_022118	ENST00000267229,ENST00000327303,ENST00000438724,ENST00000438737	RBM26.bAug10,RBM26.cAug10,RBM26.dAug10,RBM26.eAug10,RBM26.iAug10	uc001vkx.2,uc001vky.2,uc001vla.2	2.32617	2.01334	2.88661	20.7827	1.23299e-19	4.38595e-18
2:187523902:+,2:187528495:+	ITGAV	core	NM_001144999,NM_001145000,NM_002210	ENST00000261023,ENST00000374907,ENST00000433736	ITGAV.aAug10,ITGAV.bAug10,ITGAV.dAug10	uc002upq.2,uc010frs.2,uc010zfv.1	2.28123	2.28665	3.21408	20.7787	1.23994e-19	4.40726e-18
11:65660767:+,11:65661485:+	FOSL1	core	NM_005438	ENST00000312562,ENST00000532401,ENST00000534222	FOSL1.bAug10,FOSL1.eAug10,FOSL1.gAug10,FOSL1.hAug10	uc001ogg.1	1.44792	2.04772	3.07293	20.7657	1.26245e-19	4.48015e-18
8:103236368:+,8:103237113:+	RRM2B	core	NM_001172477,NM_001172478,NM_015713	ENST00000251810,ENST00000395912,ENST00000522368,ENST00000535248	RRM2B.aAug10,RRM2B.bAug10,RRM2B.cAug10,RRM2B.dAug10,RRM2B.eAug10,RRM2B.fAug10	uc003ykn.2,uc003yko.2,uc010mbv.1	2.42751	2.22738	2.8611	20.7627	1.26754e-19	4.4967e-18
5:135396625:+,5:135397189:+	TGFBI	core	NM_000358	ENST00000305126,ENST00000398813,ENST00000442011,ENST00000503087,ENST00000504205,ENST00000506699,ENST00000507018,ENST00000508076,ENST00000513497	TGFBI.aAug10,TGFBI.bAug10,TGFBI.cAug10,TGFBI.eAug10,TGFBI.gAug10,TGFBI.iAug10,TGFBI.lAug10,TGFBI.oAug10	uc003lbf.3,uc003lbg.3,uc003lbh.3,uc011cyb.1	2.29582	2.58674	2.67716	20.7478	1.29403e-19	4.58139e-18
5:35873750:+,5:35875614:+	IL7R	extended	None	ENST00000343305,ENST00000505093,ENST00000506850	IL7R.bAug10,IL7R.iAug10	uc011coo.1	0.718086	2.22944	3.06098	20.7323	1.32201e-19	4.66946e-18
8:61497374:+,8:61531139:+	RAB2A	extended	None	ENST00000529579	RAB2A.eAug10	None	0.728201	5.49591	1.53994	20.7252	1.33511e-19	4.71258e-18
4:166248916:+,4:166254492:+	SC4MOL	core	NM_006745	ENST00000261507,ENST00000504317	SC4MOL.bAug10,SC4MOL.dAug10,SC4MOL.eAug10,SC4MOL.kAug10	uc003ire.2,uc010irb.2	2.73603	2.57139	2.18602	20.7246	1.33634e-19	4.71375e-18
19:9413180:+,19:9415748:+	ZNF699	core	NM_198535	ENST00000308650	ZNF699.aAug10,ZNF699.cAug10	uc002mlc.1	2.75309	3.11816	1.87086	20.7154	1.35345e-19	4.76613e-18
2:187514612:+,2:187516709:+	ITGAV	core	NM_001144999,NM_001145000,NM_002210	ENST00000261023,ENST00000374907,ENST00000433736,ENST00000544640	ITGAV.aAug10,ITGAV.bAug10	uc002upq.2,uc010frs.2,uc010zfv.1	2.28123	2.28383	3.23123	20.7118	1.36022e-19	4.78513e-18
12:110719712:+,12:110720518:+	ATP2A2	novel	NONE	NONE	NONE	NONE	0.757794	8.99766	-2.02944	20.7094	1.36467e-19	4.79807e-18
4:140265493:+,4:140270616:+	NAA15	core	NM_057175	ENST00000296543,ENST00000398947,ENST00000480277,ENST00000544077	NAA15.aAug10,NAA15.bAug10	uc003ihu.1	1.48611	2.00445	3.03605	20.7087	1.36597e-19	4.80054e-18
12:49088219:+,12:49094796:+	CCNT1	novel	NONE	NONE	NONE	NONE	1.35092	9.18609	-1.93551	20.7057	1.37174e-19	4.81763e-18
12:58142400:+,12:58145958:+	CDK4	novel	NONE	NONE	NONE	NONE	-0.0142289	9.2535	-1.9006	20.6967	1.38894e-19	4.87153e-18
1:246797889:+,1:246805243:+	CNST	novel	NONE	NONE	NONE	NONE	1.21595	9.03145	-2.0115	20.6901	1.4016e-19	4.91265e-18
19:42373284:+,19:42375419:+	RPS19	novel	NONE	NONE	NONE	NONE	1.21655	10.2594	-1.3989	20.6861	1.40944e-19	4.93683e-18
12:49089612:+,12:49093561:+	CCNT1	novel	NONE	NONE	NONE	NONE	1.35092	7.90656	0.950233	20.6721	1.43722e-19	5.02746e-18
7:19744543:+,7:19748386:+	TWISTNB	core	NM_001002926	ENST00000222567	TWISTNB.aAug10	uc003sup.1	2.20736	2.31937	2.61771	20.6668	1.44774e-19	5.06255e-18
10:120820356:+,10:120824911:+	EIF3A	novel	NONE	NONE	NONE	NONE	1.57881	8.89129	-2.08221	20.6639	1.45351e-19	5.07937e-18
6:4052328:+,6:4052954:+	PRPF4B	core	NM_003913	ENST00000337659,ENST00000463634,ENST00000466185,ENST00000480058,ENST00000481109,ENST00000538861	PRPF4B.aAug10,PRPF4B.bAug10,PRPF4B.cAug10,PRPF4B.dAug10,PRPF4B.gAug10,PRPF4B.kAug10	uc003mvv.2,uc003mvw.2,uc011dhv.1	2.54211	2.46259	2.44415	20.6575	1.46659e-19	5.12166e-18
9:69259308:+,9:69262334:+	CBWD6	core	NM_001085457	ENST00000377439,ENST00000377441,ENST00000377445,ENST00000377450,ENST00000377457,ENST00000382399,ENST00000466320,ENST00000495626,ENST00000536466	CBWD6.aAug10,CBWD6.bAug10,CBWD6.cAug10,CBWD6.dAug10,CBWD6.eAug10,CBWD6.fAug10,CBWD6.gAug10,CBWD6.hAug10,CBWD6.jAug10,CBWD6.kAug10,CBWD6.lAug10,CBWD6.oAug10	uc004afj.3,uc004afk.3,uc004afl.3,uc011lrf.1	0.49404	2.54683	2.29139	20.6511	1.47976e-19	5.16251e-18
15:49775451:+,15:49776507:+	C15orf33,FGF7	core	NM_002009	ENST00000267843,ENST00000560704,ENST00000560765,ENST00000560979	FGF7.aAug10,FGF7.bAug10,FGF7.eAug10	uc001zxn.2	1.77182	2.22405	2.55123	20.6493	1.48333e-19	5.17326e-18
12:96641512:+,12:96653509:+	ELK3	core	NM_005230	ENST00000228741,ENST00000549985	ELK3.bAug10,ELK3.cAug10	uc001teo.1	2.11873	2.00089	3.14633	20.6434	1.49559e-19	5.21259e-18
10:5808115:+,10:5810176:+	GDI2	novel	NONE	NONE	NONE	NONE	0.111873	9.02758	-2.01383	20.6377	1.50757e-19	5.25086e-18
2:187529368:+,2:187529853:+	ITGAV	core	NM_001144999,NM_001145000,NM_002210	ENST00000261023,ENST00000374907,ENST00000433736	ITGAV.aAug10,ITGAV.bAug10,ITGAV.dAug10	uc002upq.2,uc010frs.2,uc010zfv.1	2.28123	2.05349	3.44306	20.6262	1.5317e-19	5.33137e-18
2:56412035:+,2:56611401:+	CCDC85A	novel	NONE	NONE	NONE	NONE	-0.710756	8.97324	-2.04024	20.6229	1.53877e-19	5.35241e-18
3:194168738:+,3:194169186:+	ATP13A3	core	NM_024524	ENST00000256031,ENST00000310773,ENST00000439040,ENST00000485194	ATP13A3.aAug10,ATP13A3.cAug10	uc003fty.3,uc003ftz.1	1.71466	2.1751	3.47155	20.6195	1.54611e-19	5.37618e-18
7:99688277:+,7:99688661:+	COPS6	extended	None	None	COPS6.dAug10	None	0.662747	6.00952	1.076	20.6091	1.56865e-19	5.44734e-18
2:170471234:+,2:170487284:+	PPIG	core	NM_004792	ENST00000260970,ENST00000409714,ENST00000414307,ENST00000417938,ENST00000433207,ENST00000448752,ENST00000462903,ENST00000530133	PPIG.aAug10,PPIG.bAug10,PPIG.cAug10,PPIG.dAug10,PPIG.eAug10	uc002uez.2,uc002ufa.2,uc002ufb.2,uc002ufc.1,uc002ufd.2,uc010fpx.2,uc010fpy.2	1.97704	2.06688	2.90748	20.6069	1.57352e-19	5.46068e-18
11:118630753:+,11:118633921:+	DDX6	core	NM_004397	ENST00000264018,ENST00000526070,ENST00000534980	DDX6.aAug10,DDX6.bAug10,DDX6.cAug10	uc001pub.2,uc001puc.2	1.93343	2.04891	3.35881	20.6047	1.57836e-19	5.47565e-18
11:32615495:+,11:32622235:+	EIF3M	novel	NONE	NONE	NONE	NONE	-0.152716	9.37886	-1.83852	20.591	1.60857e-19	5.57678e-18
16:75263921:+,16:75268787:+	BCAR1	novel	NONE	NONE	NONE	NONE	-0.202703	9.02381	-2.01621	20.5862	1.61941e-19	5.60514e-18
19:15378362:+,19:15379716:+	BRD4	core	NM_014299,NM_058243	ENST00000263377,ENST00000360016,ENST00000371835	BRD4.aAug10,BRD4.bAug10,BRD4.cAug10,BRD4.dAug10	uc002nar.2,uc002nas.2,uc002nat.3,uc002nau.3	1.37067	2.06908	2.80278	20.5825	1.62791e-19	5.63269e-18
3:170079217:+,3:170099032:+	SKIL	core	NM_001145097,NM_001145098,NM_001248008,NM_005414	ENST00000259119,ENST00000413427,ENST00000426052,ENST00000458537,ENST00000470571	SKIL.aAug10,SKIL.bAug10,SKIL.cAug10,SKIL.dAug10,SKIL.fAug10	uc003fgu.2,uc003fgv.2,uc003fgw.2,uc011bps.1	2.89546	3.24469	1.84427	20.5808	1.63177e-19	5.64418e-18
12:27091643:+,12:27109476:+	FGFR1OP2	novel	NONE	NONE	NONE	NONE	1.14433	9.11452	-1.97057	20.5697	1.65716e-19	5.72638e-18
19:15374359:+,19:15375215:+	BRD4	core	NM_014299,NM_058243	ENST00000263377,ENST00000360016,ENST00000371835	BRD4.aAug10,BRD4.bAug10,BRD4.cAug10,BRD4.dAug10	uc002nar.2,uc002nas.2,uc002nat.3,uc002nau.3	1.37067	2.14173	2.7344	20.5661	1.66538e-19	5.75288e-18
10:70098444:+,10:70099197:+	HNRNPH3	novel	NONE	NONE	NONE	NONE	0.769172	8.85336	-2.10125	20.5651	1.66774e-19	5.75916e-18
9:101907170:+,9:101908767:+	TGFBR1	core	NM_001130916,NM_004612	ENST00000374990,ENST00000374994,ENST00000540092,ENST00000546096,ENST00000550253,ENST00000552516	TGFBR1.aAug10,TGFBR1.bAug10,TGFBR1.cAug10	uc004azc.2,uc004azd.2,uc011lvc.1	2.17317	2.22601	3.11059	20.5615	1.67621e-19	5.78269e-18
6:90045150:+,6:90048178:+	UBE2J1	novel	NONE	NONE	NONE	NONE	-0.32758	9.0797	-1.98704	20.5526	1.6971e-19	5.84518e-18
16:82182468:+,16:82197687:+	MPHOSPH6	novel	NONE	NONE	NONE	NONE	-1.69979	9.0373	-2.00784	20.5522	1.69806e-19	5.84658e-18
14:45579423:+,14:45579752:+	PRPF39	core	NM_017922	ENST00000355765,ENST00000355846,ENST00000424478,ENST00000477626,ENST00000554081,ENST00000554439,ENST00000554785,ENST00000556718	PRPF39.aAug10,PRPF39.bAug10,PRPF39.cAug10,PRPF39.dAug10,PRPF39.fAug10	uc001wvy.3,uc001wvz.3,uc001wwa.1,uc010and.2	2.37791	2.04839	3.28905	20.5481	1.70776e-19	5.87806e-18
5:95224691:+,5:95226807:+	ELL2	novel	NONE	NONE	NONE	NONE	1.76837	10.7749	-1.14155	20.5477	1.70866e-19	5.87922e-18
2:174940255:+,2:175006553:+	OLA1	novel	NONE	NONE	NONE	NONE	0.300337	8.89052	-2.08175	20.5428	1.72055e-19	5.91626e-18
10:51610451:+,10:51613218:+	TIMM23	novel	NONE	NONE	NONE	NONE	-0.811548	8.95833	-2.0488	20.5337	1.7424e-19	5.98163e-18
8:37704693:+,8:37706114:+	BRF2	core	NM_018310	ENST00000220659,ENST00000520601,ENST00000545765	BRF2.aAug10,BRF2.cAug10	uc003xkk.2	1.82651	2.25392	2.55608	20.5317	1.74725e-19	5.99634e-18
11:43837051:+,11:43876265:+	HSD17B12	novel	NONE	NONE	NONE	NONE	0.359959	8.9617	-2.04749	20.5222	1.77073e-19	6.067e-18
22:41548016:+,22:41548210:+	EP300	core	NM_001429	ENST00000263253	EP300.aAug10	uc003azl.3	2.20621	2.36775	2.58745	20.517	1.78367e-19	6.10552e-18
X:48433671:+,X:48434702:+	RBM3	extended	None	ENST00000489344	RBM3.fAug10	None	0.972646	3.94476	1.52186	20.5146	1.78953e-19	6.11749e-18
X:51641289:+,X:51643278:+	MAGED1	novel	NONE	NONE	NONE	NONE	-0.10437	9.02642	-2.0145	20.4892	1.85418e-19	6.32411e-18
5:55256389:+,5:55259180:+	IL6ST	core	NM_001190981,NM_002184,NM_175767	ENST00000336909,ENST00000381287,ENST00000381293,ENST00000381294,ENST00000381298,ENST00000502326,ENST00000503773,ENST00000522633,ENST00000536319,ENST00000542298	IL6ST.aAug10,IL6ST.bAug10,IL6ST.cAug10,IL6ST.dAug10,IL6ST.eAug10	uc003jqq.2,uc003jqr.2,uc010iwb.2,uc010iwc.2,uc011cqk.1	1.90077	2.14414	3.604	20.4861	1.8624e-19	6.35007e-18
9:114677026:+,9:114687057:+	UGCG	novel	NONE	NONE	NONE	NONE	1.87524	9.16619	-1.94528	20.4776	1.88466e-19	6.42184e-18
5:72868449:+,5:72872777:+	UTP15	core	NM_032175	ENST00000296792,ENST00000508491,ENST00000509005,ENST00000512550,ENST00000543251	UTP15.aAug10,UTP15.bAug10,UTP15.cAug10,UTP15.dAug10,UTP15.fAug10	uc003kcw.1,uc010ize.1,uc011cso.1,uc011csp.1	2.33587	2.39183	2.41891	20.4752	1.89103e-19	6.4352e-18
2:151331498:+,2:151343782:+	RND3	novel	NONE	NONE	NONE	NONE	1.9822	7.46388	1.11027	20.4718	1.90003e-19	6.46274e-18
22:41546202:+,22:41547837:+	EP300	core	NM_001429	ENST00000263253	EP300.aAug10	uc003azl.3	2.20621	2.25294	2.5542	20.4666	1.91379e-19	6.50633e-18
12:6439232:+,12:6439764:+	TNFRSF1A	novel	NONE	NONE	NONE	NONE	0.098626	8.94379	-2.05552	20.4657	1.91638e-19	6.51094e-18
6:75902071:+,6:75904547:+	COL12A1	core	NM_004370	ENST00000322507,ENST00000416123,ENST00000432784,ENST00000483888	COL12A1.aAug10	uc003phs.2	1.04402	2.02913	3.70208	20.4511	1.95577e-19	6.62763e-18
20:9343622:+,20:9351861:+	PLCB4	novel	NONE	NONE	NONE	NONE	-1.53433	8.89313	-2.08173	20.4472	1.96654e-19	6.66199e-18
17:77770114:+,17:77770729:+	CBX8	novel	NONE	NONE	NONE	NONE	1.52481	9.30778	-1.87367	20.4457	1.9706e-19	6.67146e-18
15:60646412:+,15:60649345:+	ANXA2	novel	NONE	NONE	NONE	NONE	0.412886	8.87847	-2.08897	20.4437	1.97626e-19	6.68844e-18
14:39517933:+,14:39532528:+	SEC23A	novel	NONE	NONE	NONE	NONE	0.833698	8.88944	-2.08358	20.4425	1.97962e-19	6.69766e-18
1:52530610:+,1:52551784:+	BTF3L4	core	NM_001243767	ENST00000489308	BTF3L4.cAug10,BTF3L4.lAug10	uc010onh.1	0.377816	3.07639	1.81019	20.4283	2.01927e-19	6.82525e-18
13:28004758:+,13:28008942:+	GTF3A	extended	None	None	GTF3A.gAug10	None	0.683147	8.78691	-2.13373	20.4258	2.02634e-19	6.84694e-18
22:32883815:+,22:32889092:+	FBXO7	novel	NONE	NONE	NONE	NONE	-0.00624589	9.25147	-1.903	20.4214	2.03897e-19	6.88519e-18
12:69218431:+,12:69235612:+	MDM2	novel	NONE	NONE	NONE	NONE	2.96722	7.03227	0.842484	20.4202	2.04238e-19	6.89449e-18
3:186502302:+,3:186503953:+	EIF4A2	novel	NONE	NONE	NONE	NONE	0.725695	10.0783	-1.4899	20.4186	2.04699e-19	6.90785e-18
1:183854072:+,1:183857608:+	RGL1	core	NM_015149	ENST00000304685,ENST00000360851,ENST00000367531,ENST00000536277,ENST00000539189,ENST00000543395	RGL1.aAug10,RGL1.bAug10,RGL1.cAug10,RGL1.dAug10,RGL1.eAug10,RGL1.gAug10,RGL1.iAug10	uc001gqm.2,uc001gqo.2,uc010pof.1,uc010pog.1,uc010poh.1,uc010poi.1	2.33894	2.96106	1.83401	20.4183	2.04805e-19	6.90918e-18
19:9730258:+,19:9731838:+	ZNF561	core	NM_152289	ENST00000302851,ENST00000326044,ENST00000354661,ENST00000424629,ENST00000443819,ENST00000444519,ENST00000444611,ENST00000444802,ENST00000465974,ENST00000479943,ENST00000485150,ENST00000495503,ENST00000497409	ZNF562andZNF561.aAug10,ZNF562andZNF561.bAug10,ZNF562andZNF561.cAug10,ZNF562andZNF561.gAug10,ZNF562andZNF561.pAug10,ZNF562andZNF561.qAug10,ZNF562andZNF561.sAug10,ZNF562andZNF561.vbAug10,ZNF562andZNF561.vdAug10,ZNF562andZNF561.vfAug10,ZNF562andZNF561.vhAug10,ZNF562andZNF561.vlAug10	uc002mlu.2,uc010dwu.2,uc010xkr.1	2.29012	2.89591	1.90811	20.4116	2.06724e-19	6.96053e-18
2:88885579:+,2:88887500:+	EIF2AK3	core	NM_004836	ENST00000303236,ENST00000415570,ENST00000419748,ENST00000535951	EIF2AK3.aAug10,EIF2AK3.bAug10,EIF2AK3.cAug10	uc002stc.3	2.82567	3.11704	1.90254	20.4058	2.08415e-19	7.00851e-18
19:9268070:+,19:9269502:+	ZNF317	core	NM_001190791	ENST00000360385	ZNF317.bAug10,ZNF317.dAug10,ZNF317.gAug10	uc002mkw.2,uc002mky.2	1.38717	3.66928	1.55344	20.3983	2.10608e-19	7.07546e-18
1:8923057:+,1:8923294:+	ENO1	novel	NONE	NONE	NONE	NONE	0.881223	9.33483	-1.86126	20.3974	2.10879e-19	7.08233e-18
X:23801826:+,X:23801917:+	SAT1	core	NM_002970,NR_027783	ENST00000342463,ENST00000379253,ENST00000379270,ENST00000487713,ENST00000489394	SAT1.aAug10,SAT1.bAug10,SAT1.cAug10,SAT1.gAug10,SAT1.hAug10,SAT1.jAug10,SAT1.lAug10,SAT1.nAug10	uc004dau.2,uc004dav.2,uc010nfv.2	3.21701	2.7862	2.10509	20.3911	2.12769e-19	7.13668e-18
3:186299866:+,3:186301654:+	DNAJB11	novel	NONE	NONE	NONE	NONE	0.415585	9.01569	-2.01988	20.3878	2.13755e-19	7.16746e-18
7:141442029:+,7:141443702:+	SSBP1	novel	NONE	NONE	NONE	NONE	0.822413	8.91079	-2.07303	20.3798	2.16179e-19	7.23721e-18
16:3786816:+,16:3790400:+	CREBBP	novel	NONE	NONE	NONE	NONE	0.775499	8.76248	-2.14655	20.3639	2.21045e-19	7.38369e-18
6:4047482:+,6:4049250:+	PRPF4B	core	NM_003913	ENST00000337659,ENST00000463634,ENST00000480058,ENST00000481109,ENST00000538861	PRPF4B.aAug10,PRPF4B.bAug10,PRPF4B.cAug10,PRPF4B.dAug10	uc003mvv.2,uc003mvw.2,uc011dhv.1	2.54211	2.6132	2.4041	20.3608	2.22021e-19	7.41393e-18
4:100808511:+,4:100813157:+	MAPKSP1	core	NM_001243736,NM_021970,NR_024170	ENST00000226522,ENST00000499666,ENST00000515100	MAPKSP1.aAug10,MAPKSP1.bAug10,MAPKSP1.cAug10,MAPKSP1.dAug10	uc003hvg.2,uc003hvh.2,uc003hvi.2	0.943415	2.05175	3.11106	20.3391	2.28913e-19	7.61989e-18
5:135389769:+,5:135390405:+	TGFBI	core	NM_000358	ENST00000305126,ENST00000398813,ENST00000442011,ENST00000504205,ENST00000506699,ENST00000507018,ENST00000508767,ENST00000514554,ENST00000515433	TGFBI.aAug10,TGFBI.bAug10,TGFBI.cAug10,TGFBI.dAug10,TGFBI.eAug10,TGFBI.fAug10	uc003lbf.3,uc003lbg.3,uc003lbh.3,uc010jed.2,uc011cyb.1	2.29582	2.56375	2.45714	20.3338	2.30618e-19	7.66693e-18
2:174940255:+,2:174988323:+	OLA1	novel	NONE	NONE	NONE	NONE	0.300337	8.75817	-2.1488	20.3313	2.31422e-19	7.69124e-18
9:101900371:+,9:101904818:+	TGFBR1	core	NM_001130916,NM_004612	ENST00000374990,ENST00000374994,ENST00000540092,ENST00000546096,ENST00000549766,ENST00000550253,ENST00000552516	TGFBR1.aAug10,TGFBR1.bAug10,TGFBR1.cAug10	uc004azc.2,uc004azd.2,uc011lvc.1	2.17317	2.08844	3.14066	20.3263	2.33062e-19	7.7384e-18
17:36934053:+,17:36935636:+	PIP4K2B	novel	NONE	NONE	NONE	NONE	-0.124054	9.00531	-2.0239	20.3224	2.34351e-19	7.7763e-18
18:71816344:+,18:71822541:+	C18orf55	novel	NONE	NONE	NONE	NONE	-0.175571	8.87749	-2.08909	20.3194	2.35336e-19	7.80652e-18
4:41259026:+,4:41262664:+	UCHL1	novel	NONE	NONE	NONE	NONE	0.541156	4.55188	1.19533	20.3062	2.39752e-19	7.94413e-18
16:67650781:+,16:67654600:+	CTCF	core	NM_001191022,NM_006565	ENST00000264010,ENST00000401394	CTCF.aAug10,CTCF.bAug10	uc002etl.2,uc010cek.2	1.64814	2.04218	2.8216	20.2877	2.46111e-19	8.1383e-18
14:36780931:+,14:36783718:+	MBIP	novel	NONE	NONE	NONE	NONE	0.24962	9.25684	-1.89757	20.2805	2.48609e-19	8.21316e-18
11:47754222:+,11:47755577:+	FNBP4	core	NM_015308	ENST00000263773,ENST00000525792,ENST00000527894,ENST00000528388,ENST00000534003	FNBP4.aAug10,FNBP4.bAug10,FNBP4.cAug10,FNBP4.dAug10,FNBP4.gAug10,FNBP4.hAug10,FNBP4.jAug10	uc001ngj.2,uc001ngl.2,uc009ylv.2	2.14053	2.12858	2.92662	20.2749	2.50574e-19	8.27288e-18
7:150932698:+,7:150934460:+	CHPF2	novel	NONE	NONE	NONE	NONE	-0.130058	3.99374	1.55329	20.2743	2.5079e-19	8.2748e-18
7:56128109:+,7:56129440:+	CCT6A	novel	NONE	NONE	NONE	NONE	-0.66134	8.75357	-2.15121	20.2646	2.54257e-19	8.38132e-18
11:13443362:+,11:13484639:+	BTBD10	novel	NONE	NONE	NONE	NONE	1.1058	8.90621	-2.07542	20.2613	2.55439e-19	8.41764e-18
3:195391121:+,3:195392937:+	SDHAP2	core	NR_003265	ENST00000414625,ENST00000429897,ENST00000445430,ENST00000453324,ENST00000455183,ENST00000457233,ENST00000539252,ENST00000539717	SDHAP2andMUC20.dAug10,SDHAP2andMUC20.eAug10,SDHAP2andMUC20.fAug10,SDHAP2andMUC20.gAug10,SDHAP2andMUC20.kAug10,SDHAP2andMUC20.mAug10,SDHAP2andMUC20.nAug10,SDHAP2andMUC20.oAug10,SDHAP2andMUC20.vfAug10,SDHAP2andMUC20.voAug10,SDHAP2andMUC20.vxAug10	uc003fut.3,uc003fuu.3,uc003fuv.2,uc003fuw.2,uc011btb.1,uc011btc.1	2.01632	3.43779	1.57655	20.2605	2.55722e-19	8.42435e-18
10:63810759:+,10:63816876:+	ARID5B	core	NM_001244638,NM_032199	ENST00000279873,ENST00000309334	ARID5B.aAug10,ARID5B.dAug10,ARID5B.fAug10,ARID5B.gAug10,ARID5B.iAug10	uc001jlt.1,uc001jlu.1	1.64083	2.0168	2.88999	20.26	2.55902e-19	8.42764e-18
20:2473471:+,20:2474165:+	ZNF343	core	NM_024325	ENST00000278772,ENST00000358413,ENST00000381253,ENST00000421216,ENST00000445484,ENST00000461548	ZNF343andSNRPB.aAug10,ZNF343andSNRPB.bAug10,ZNF343andSNRPB.cAug10,ZNF343andSNRPB.iAug10,ZNF343andSNRPB.nAug10,ZNF343andSNRPB.pAug10,ZNF343andSNRPB.qAug10,ZNF343andSNRPB.sAug10	uc002wge.1,uc010gao.1	2.33008	2.61947	2.37414	20.2576	2.56766e-19	8.4508e-18
5:68471364:+,5:68473351:+	CCNB1	extended	None	ENST00000505500	CCNB1.cAug10	uc010ixb.2	-0.567048	5.76192	0.916634	20.2572	2.56924e-19	8.45335e-18
1:173833442:+,1:173834609:+	GAS5	extended	None	None	GAS5_.wkAug10,GAS5_.wsAug10	None	0.884677	6.2098	0.894067	20.2567	2.57111e-19	8.45685e-18
19:16436843:+,19:16437667:+	KLF2	core	NM_016270	ENST00000248071	KLF2.aAug10	uc002ndw.2	2.1834	2.76502	2.14788	20.2535	2.58253e-19	8.48647e-18
1:16460410:+,1:16460963:+	EPHA2	core	NM_004431	ENST00000358432	EPHA2.aAug10	uc001aya.1	1.80946	2.0738	2.97652	20.2526	2.58612e-19	8.49561e-18
20:2636188:+,20:2636580:+	NOP56	extended	None	None	NOP56_.rAug10	None	-0.277341	3.98537	1.60938	20.2443	2.61637e-19	8.57623e-18
3:156266792:+,3:156272746:+	SSR3	novel	NONE	NONE	NONE	NONE	0.254692	9.21197	-1.92273	20.2432	2.62058e-19	8.58468e-18
6:41058048:+,6:41059267:+	NFYA	core	NM_002505,NM_021705	ENST00000341376,ENST00000353205	NFYA.bAug10,NFYA.cAug10,NFYA.dAug10,NFYA.iAug10,NFYA.pAug10	uc003opo.2,uc003opp.2,uc003opq.2	2.62712	2.884	2.19543	20.2409	2.62923e-19	8.6046e-18
14:52458159:+,14:52470912:+	C14orf166	novel	NONE	NONE	NONE	NONE	-0.0579158	8.83556	-2.10965	20.24	2.63227e-19	8.60957e-18
5:135489852:+,5:135496545:+	SMAD5	core	NM_001001419,NM_001001420,NM_005903	ENST00000514641,ENST00000545279,ENST00000545620	SMAD5.aAug10,SMAD5.bAug10,SMAD5.cAug10,SMAD5.dAug10	uc003lbj.1,uc003lbk.1,uc003lbl.1	2.12046	2.49073	2.41434	20.2398	2.63311e-19	8.60965e-18
11:62363809:+,11:62364109:+	MTA2	novel	NONE	NONE	NONE	NONE	0.898302	9.10601	-1.97332	20.2348	2.65194e-19	8.66583e-18
18:9583273:+,18:9584719:+	PPP4R1	novel	NONE	NONE	NONE	NONE	0.426357	8.8693	-2.09332	20.2313	2.66484e-19	8.7053e-18
2:68273175:+,2:68274305:+	C1D	novel	NONE	NONE	NONE	NONE	0.440901	8.89873	-2.07898	20.2272	2.6804e-19	8.75069e-18
2:187455250:+,2:187466748:+	ITGAV	core	NM_001145000,NM_002210	ENST00000261023,ENST00000374907,ENST00000544640	mumemo.aAug10	uc002upq.2,uc010frs.2	2.28123	2.39847	2.79562	20.2268	2.68219e-19	8.75381e-18
17:47782643:+,17:47784327:+	SLC35B1	novel	NONE	NONE	NONE	NONE	0.711848	8.88402	-2.08586	20.2178	2.7163e-19	8.84868e-18
3:98536737:+,3:98538046:+	DCBLD2	core	NM_080927	ENST00000326840,ENST00000326857,ENST00000404023,ENST00000460008	DCBLD2.aAug10,DCBLD2.bAug10,DCBLD2.cAug10	uc003dtd.2,uc003dte.2	1.72303	2.1631	2.69119	20.2133	2.73393e-19	8.89784e-18
11:27680132:+,11:27721711:+	BDNF,BDNF-AS1	core	NM_001709	ENST00000356660	BDNF.jAug10	uc001mru.2	2.57477	2.48413	2.32145	20.2022	2.77716e-19	9.01344e-18
12:57058282:+,12:57065533:+	PTGES3	novel	NONE	NONE	NONE	NONE	-0.364922	8.9976	-2.02751	20.197	2.79761e-19	9.077e-18
6:4021700:+,6:4031793:+	PRPF4B	core	NM_003913	ENST00000337659,ENST00000480058	PRPF4B.aAug10,PRPF4B.bAug10	uc003mvv.2	2.54211	2.88145	2.09124	20.1918	2.81809e-19	9.135e-18
2:175939563:+,2:175957789:+	ATF2	extended	None	ENST00000435004	None	None	0.624478	8.86508	-2.09602	20.1864	2.83973e-19	9.19664e-18
1:160278966:+,1:160281658:+	COPA	novel	NONE	NONE	NONE	NONE	-0.514427	8.87618	-2.0905	20.181	2.86172e-19	9.25362e-18
10:13652185:+,10:13653615:+	PRPF18	core	NM_003675	ENST00000320054,ENST00000378544,ENST00000378572,ENST00000417658	PRPF18.aAug10,PRPF18.bAug10,PRPF18.cAug10	uc001imp.2	2.0355	2.34283	2.45216	20.1798	2.86658e-19	9.26649e-18
11:64012294:+,11:64012676:+	PPP1R14B	novel	NONE	NONE	NONE	NONE	1.05901	8.94489	-2.05577	20.1756	2.88353e-19	9.31271e-18
19:6421328:+,19:6422351:+	KHSRP	novel	NONE	NONE	NONE	NONE	-0.03465	8.79244	-2.13152	20.1695	2.90873e-19	9.38831e-18
8:103220513:+,8:103225004:+	RRM2B	core	NM_001172477,NM_001172478,NM_015713	ENST00000251810,ENST00000395910,ENST00000395912,ENST00000519317,ENST00000522368,ENST00000522394,ENST00000535248	RRM2B.aAug10,RRM2B.bAug10,RRM2B.cAug10,RRM2B.eAug10,RRM2B.fAug10,RRM2B.gAug10,RRM2B.hAug10,RRM2B.kAug10	uc003ykn.2,uc003yko.2,uc010mbv.1,uc010mbw.1,uc010mbx.1	2.42751	2.26209	2.83313	20.1646	2.92893e-19	9.44774e-18
8:6566408:+,8:6612572:+	AGPAT5	extended	None	ENST00000518327	AGPAT5.iAug10	uc011kwm.1	-0.523411	8.78477	-2.13441	20.1637	2.93282e-19	9.45739e-18
5:135390550:+,5:135391369:+	TGFBI	core	NM_000358	ENST00000305126,ENST00000398813,ENST00000442011,ENST00000504205,ENST00000506699,ENST00000507018,ENST00000509485,ENST00000514554	TGFBI.aAug10,TGFBI.bAug10,TGFBI.cAug10,TGFBI.dAug10,TGFBI.eAug10	uc003lbf.3,uc003lbg.3,uc003lbh.3,uc010jed.2,uc011cyb.1	2.29582	2.50556	2.24691	20.1632	2.93492e-19	9.46126e-18
5:60835586:+,5:60837711:+	ZSWIM6	core	NM_020928	ENST00000252744	ZSWIM6.aAug10	uc003jsr.2	2.05337	2.3648	2.53774	20.1628	2.93664e-19	9.46389e-18
8:81897612:+,8:81899605:+	PAG1	core	NM_018440	ENST00000220597,ENST00000522811	PAG1.bAug10,PAG1.fAug10	uc003ybz.2	2.96417	2.90441	1.99565	20.1624	2.93816e-19	9.4659e-18
14:53345407:+,14:53347962:+	FERMT2	novel	NONE	NONE	NONE	NONE	-0.401497	8.70353	-2.17552	20.151	2.98615e-19	9.60581e-18
8:90784018:+,8:90784895:+	RIPK2	core	NM_003821	ENST00000220751,ENST00000522965,ENST00000540020	RIPK2.aAug10,RIPK2.bAug10	uc003yee.2,uc003yef.2	1.88115	2.09577	2.78288	20.1461	3.00687e-19	9.65767e-18
15:59970286:+,15:59971791:+	BNIP2	core	NM_004330	ENST00000267859,ENST00000415213,ENST00000560458	BNIP2.aAug10,BNIP2.bAug10,BNIP2.cAug10	uc010uhb.1,uc010uhc.1	1.72679	2.10763	2.98207	20.1431	3.01962e-19	9.69567e-18
12:58217872:+,12:58220129:+	CTDSP2	novel	NONE	NONE	NONE	NONE	0.747755	8.67823	-2.18823	20.1404	3.03143e-19	9.73064e-18
5:82352973:+,5:82360827:+	TMEM167A	novel	NONE	NONE	NONE	NONE	0.219569	8.89468	-2.07917	20.1348	3.05559e-19	9.79923e-18
5:137893185:+,5:137894242:+	HSPA9	extended	None	ENST00000507097	HSPA9andSNORD63.bAug10	uc011cyw.1	-0.751461	9.03982	-2.00884	20.1304	3.07465e-19	9.85135e-18
1:150310802:+,1:150312874:+	PRPF3	core	NM_004698	ENST00000324862,ENST00000414970,ENST00000467329	PRPF3.aAug10,PRPF3.bAug10,PRPF3.cAug10,PRPF3.dAug10,PRPF3.eAug10	uc001eum.3,uc009wlq.1,uc010pca.1,uc010pcb.1	2.44204	2.23551	2.73806	20.1206	3.11778e-19	9.97736e-18
2:187516816:+,2:187519377:+	ITGAV	core	NM_001144999,NM_001145000,NM_002210	ENST00000261023,ENST00000374907,ENST00000433736	ITGAV.aAug10,ITGAV.bAug10	uc002upq.2,uc010frs.2,uc010zfv.1	2.28123	2.28453	3.13171	20.1057	3.18462e-19	1.01758e-17
3:155547692:+,3:155551646:+	SLC33A1	novel	NONE	NONE	NONE	NONE	-0.19351	8.79572	-2.13058	20.1053	3.18637e-19	1.01783e-17
7:17367472:+,7:17369576:+	AHR	core	NM_001621	ENST00000242057,ENST00000463496	AHR.aAug10,AHR.bAug10	uc003stt.3,uc011jxz.1	2.56517	2.86506	2.34593	20.0996	3.21223e-19	1.02454e-17
19:49999728:+,19:50000777:+	RPS11	novel	NONE	NONE	NONE	NONE	1.14489	5.7768	1.31099	20.0949	3.234e-19	1.03116e-17
15:66793842:+,15:66794950:+	RPL4	novel	NONE	NONE	NONE	NONE	1.00912	8.6521	-2.20157	20.0921	3.24653e-19	1.03485e-17
16:74336190:+,16:74339187:+	PSMD7	novel	NONE	NONE	NONE	NONE	0.340003	8.92638	-2.06477	20.0793	3.30656e-19	1.05009e-17
10:292913:+,10:294276:+	ZMYND11	novel	NONE	NONE	NONE	NONE	-0.292251	8.7111	-2.17229	20.0786	3.30962e-19	1.05019e-17
6:32942542:+,6:32943161:+	BRD2	core	NM_001113182,NM_001199455,NM_001199456,NM_005104	ENST00000374825,ENST00000374831,ENST00000395287,ENST00000395289,ENST00000449025,ENST00000449085,ENST00000456339,ENST00000495733	BRD2.aAug10,BRD2.bAug10,BRD2.cAug10,BRD2.dAug10,BRD2.fAug10,BRD2.sAug10	uc003ocn.3,uc003oco.2,uc003ocq.3,uc010juh.2	1.29511	2.15248	3.04498	20.072	3.34074e-19	1.0591e-17
11:11974418:+,11:11976581:+	USP47	novel	NONE	NONE	NONE	NONE	0.402911	8.84146	-2.10789	20.0663	3.36837e-19	1.0669e-17
14:54897122:+,14:54903087:+	CNIH	extended	None	ENST00000557659	CNIH.gAug10	None	0.336825	4.61329	1.18208	20.0569	3.41351e-19	1.07957e-17
14:75413111:+,14:75416060:+	PGF	novel	NONE	NONE	NONE	NONE	0.165809	9.31842	-1.86997	20.0536	3.42978e-19	1.08407e-17
5:64967825:+,5:64976321:+	SGTB	novel	NONE	NONE	NONE	NONE	1.04778	8.76352	-2.14653	20.0451	3.47149e-19	1.09593e-17
13:96329591:+,13:96361481:+	DNAJC3	core	NM_006260	ENST00000376795	DNAJC3.aAug10,DNAJC3.bAug10,DNAJC3.cAug10	uc001vmp.2,uc001vmq.2,uc001vmr.2	2.54568	2.73601	2.34784	20.0402	3.49574e-19	1.10193e-17
5:176707835:+,5:176710788:+	NSD1	novel	NONE	NONE	NONE	NONE	1.3349	8.62541	-2.21481	20.0273	3.56076e-19	1.12075e-17
22:41566575:+,22:41568503:+	EP300	core	NM_001429	ENST00000263253	EP300.aAug10	uc003azl.3	2.20621	2.20675	2.83109	20.0256	3.56951e-19	1.12283e-17
2:231663612:+,2:231674978:+	CAB39	core	NM_001130849,NM_001130850,NM_016289	ENST00000258418,ENST00000409788,ENST00000410084	CAB39.aAug10,CAB39.bAug10,CAB39.cAug10	uc002vqx.2,uc010fxq.2,uc010fxr.2	2.21845	2.00882	3.09794	20.0151	3.62337e-19	1.13706e-17
18:48591976:+,18:48593389:+	SMAD4	core	NM_005359	ENST00000342988,ENST00000398417,ENST00000544926	ELAC1andSMAD4.aAug10,ELAC1andSMAD4.bAug10	uc002lfb.3,uc010xdp.1	0.998169	2.0355	2.8731	20.0016	3.69359e-19	1.15812e-17
X:19368228:+,X:19375770:+	PDHA1	novel	NONE	NONE	NONE	NONE	0.358208	8.62956	-2.21269	20.0016	3.69379e-19	1.15812e-17
16:67645516:+,16:67650648:+	CTCF	novel	NONE	NONE	NONE	NONE	1.64814	9.33717	-1.85961	19.9961	3.72269e-19	1.16614e-17
3:160967348:+,3:160968568:+	NMD3	novel	NONE	NONE	NONE	NONE	-0.215589	8.6894	-2.18346	19.9951	3.72846e-19	1.1676e-17
12:12975666:+,12:12976804:+	DDX47	novel	NONE	NONE	NONE	NONE	1.69437	8.68115	-2.18645	19.9931	3.73894e-19	1.17053e-17
17:80202707:+,17:80206751:+	CSNK1D	core	NM_001893	ENST00000314028,ENST00000398519	CSNK1D.cAug10,CSNK1D.iAug10,CSNK1D.sAug10	uc002kej.2	1.05022	3.42205	1.57362	19.9929	3.74005e-19	1.17053e-17
4:166259930:+,4:166261373:+	SC4MOL	core	NM_001017369,NM_006745	ENST00000261507,ENST00000393766,ENST00000504317,ENST00000507013	SC4MOL.aAug10,SC4MOL.bAug10,SC4MOL.cAug10,SC4MOL.dAug10,SC4MOL.fAug10,SC4MOL.gAug10	uc003ire.2,uc003irf.2,uc010irb.2	2.73603	2.58491	2.19276	19.9915	3.74745e-19	1.1725e-17
11:237144:+,11:244426:+	PSMD13	novel	NONE	NONE	NONE	NONE	-0.418138	8.61184	-2.22149	19.9891	3.76035e-19	1.17618e-17
19:36122126:+,19:36124000:+	RBM42	extended	None	None	RBM42.eAug10	uc010eef.2	-0.148063	8.81447	-2.11918	19.9828	3.79422e-19	1.18501e-17
12:49089612:+,12:49094796:+	CCNT1	novel	NONE	NONE	NONE	NONE	1.35092	9.74909	-1.65474	19.9793	3.81363e-19	1.19046e-17
8:37706173:+,8:37707148:+	BRF2	core	NM_018310	ENST00000220659,ENST00000520601,ENST00000521170,ENST00000522539,ENST00000545765	BRF2.aAug10,BRF2.cAug10,BRF2.dAug10,BRF2.eAug10	uc003xkk.2	1.82651	2.26435	2.4428	19.9721	3.8527e-19	1.20114e-17
22:28249651:+,22:28254375:+	PITPNB	extended	None	ENST00000320996	PITPNB.cAug10	uc003adl.2,uc011akg.1	0.419828	5.66464	1.0161	19.9652	3.8912e-19	1.21243e-17
13:79951650:+,13:79952924:+	RBM26	core	NM_022118	ENST00000267229,ENST00000327303,ENST00000438724,ENST00000438737,ENST00000472143	RBM26.aAug10,RBM26.bAug10,RBM26.cAug10,RBM26.eAug10,RBM26.lAug10,RBM26.mAug10,RBM26.nAug10,RBM26.rAug10	uc001vky.2,uc001vkz.2,uc001vla.2,uc001vlc.1	2.32617	2.51906	2.60194	19.9634	3.90085e-19	1.21435e-17
11:47776216:+,11:47786822:+	FNBP4	core	NM_015308	ENST00000263773,ENST00000534003	FNBP4.aAug10,FNBP4.bAug10,FNBP4.fAug10	uc001ngj.2,uc009ylv.2	2.14053	2.10011	2.7408	19.9618	3.91028e-19	1.21621e-17
22:41533794:+,22:41536144:+	EP300	core	NM_001429	ENST00000263253	EP300.aAug10	uc003azl.3	2.20621	2.49385	2.62872	19.9586	3.92783e-19	1.22131e-17
15:78834272:+,15:78836532:+	PSMA4	novel	NONE	NONE	NONE	NONE	0.157897	8.6335	-2.21066	19.9569	3.93763e-19	1.22388e-17
2:162224060:+,2:162226618:+	PSMD14	novel	NONE	NONE	NONE	NONE	0.673542	8.87827	-2.08818	19.953	3.95945e-19	1.22916e-17
8:103237246:+,8:103238146:+	RRM2B	core	NM_001172477,NM_001172478,NM_015713	ENST00000251810,ENST00000395912,ENST00000522368,ENST00000523957,ENST00000535248	RRM2B.aAug10,RRM2B.bAug10,RRM2B.cAug10,RRM2B.dAug10,RRM2B.eAug10,RRM2B.fAug10,RRM2B.lAug10	uc003ykn.2,uc003yko.2,uc010mbv.1	2.42751	2.36069	2.76869	19.9369	4.05202e-19	1.25547e-17
2:187498101:+,2:187500809:+	ITGAV	core	NM_001144999,NM_002210	ENST00000261023,ENST00000433736,ENST00000544640	ITGAV.aAug10,ITGAV.eAug10	uc002upq.2,uc010zfv.1	2.28123	2.17034	3.16648	19.9365	4.05415e-19	1.25576e-17
5:72866536:+,5:72868314:+	UTP15	core	NM_032175	ENST00000296792,ENST00000508491,ENST00000509005,ENST00000543251	UTP15.aAug10,UTP15.bAug10,UTP15.cAug10,UTP15.dAug10	uc003kcw.1,uc010ize.1,uc011cso.1,uc011csp.1	2.33587	2.39314	2.38001	19.9325	4.07735e-19	1.26258e-17
2:187500934:+,2:187501792:+	ITGAV	core	NM_001144999,NM_001145000,NM_002210	ENST00000261023,ENST00000374907,ENST00000433736,ENST00000544640	ITGAV.aAug10,ITGAV.bAug10	uc002upq.2,uc010frs.2,uc010zfv.1	2.28123	2.24635	3.41498	19.9299	4.09279e-19	1.26661e-17
19:21324989:+,19:21349138:+	ZNF431	novel	NONE	NONE	NONE	NONE	0.706048	8.68045	-2.18665	19.9194	4.15464e-19	1.28349e-17
22:41569788:+,22:41572251:+	EP300	core	NM_001429	ENST00000263253	EP300.aAug10	uc003azl.3	2.20621	2.11725	2.66058	19.9123	4.19742e-19	1.29546e-17
20:2474690:+,20:2481302:+	ZNF343	core	NM_024325	ENST00000278772,ENST00000381253,ENST00000421216,ENST00000461548	ZNF343andSNRPB.aAug10,ZNF343andSNRPB.cAug10,ZNF343andSNRPB.iAug10,ZNF343andSNRPB.pAug10,ZNF343andSNRPB.qAug10,ZNF343andSNRPB.sAug10,ZNF343andSNRPB.vaAug10,ZNF343andSNRPB.vbAug10	uc002wge.1	2.33008	2.72506	2.06955	19.9047	4.24296e-19	1.30885e-17
7:121012193:+,7:121023011:+	FAM3C	novel	NONE	NONE	NONE	NONE	1.13459	8.60206	-2.22684	19.9026	4.25593e-19	1.31246e-17
5:133328046:+,5:133340338:+	VDAC1	novel	NONE	NONE	NONE	NONE	0.986916	8.59308	-2.23138	19.8998	4.27295e-19	1.31733e-17
16:70572363:+,16:70578341:+	SF3B3	novel	NONE	NONE	NONE	NONE	0.257024	8.73419	-2.15937	19.8814	4.38726e-19	1.35059e-17
8:109215732:+,8:109240496:+	EIF3E	extended	None	ENST00000522352	None	None	0.753503	4.82216	1.22298	19.8755	4.42502e-19	1.36062e-17
4:122591167:+,4:122593688:+	ANXA5	novel	NONE	NONE	NONE	NONE	0.32136	6.49749	0.846867	19.8658	4.48709e-19	1.3777e-17
4:24558033:+,4:24585946:+	DHX15	novel	NONE	NONE	NONE	NONE	0.752421	8.55642	-2.24932	19.8609	4.51845e-19	1.38571e-17
22:41560134:+,22:41562603:+	EP300	core	NM_001429	ENST00000263253	EP300.aAug10,EP300.cAug10	uc003azl.3	2.20621	2.17384	2.72068	19.8597	4.52667e-19	1.38742e-17
13:31211994:+,13:31216765:+	USPL1	core	NM_005800	ENST00000255304	USPL1.aAug10,USPL1.bAug10,USPL1.cAug10,USPL1.dAug10,USPL1.lAug10	uc001utb.2,uc001utc.2,uc001utd.2,uc001ute.1	2.88417	2.70448	1.95838	19.8575	4.54099e-19	1.3914e-17
12:69203072:+,12:69218143:+	MDM2	extended	None	ENST00000481186	MDM2.fAug10	uc009zrd.2	2.96722	8.41778	1.30688	19.8503	4.58768e-19	1.40326e-17
1:16461062:+,1:16464348:+	EPHA2	novel	NONE	NONE	NONE	NONE	1.80946	8.54701	-2.25397	19.8421	4.64269e-19	1.41777e-17
6:126314968:+,6:126319369:+	TRMT11	novel	NONE	NONE	NONE	NONE	1.44971	8.55161	-2.25173	19.8406	4.65232e-19	1.41989e-17
20:13797603:+,20:13797764:+	C20orf7	core	NM_001039375,NM_024120,NR_029377	ENST00000378081,ENST00000378106,ENST00000463598,ENST00000475968,ENST00000476200,ENST00000479682,ENST00000479716,ENST00000486772,ENST00000487478,ENST00000536501	C20orf7.aAug10,C20orf7.bAug10,C20orf7.cAug10,C20orf7.gAug10,C20orf7.iAug10,C20orf7.jAug10,C20orf7.kAug10,C20orf7.oAug10,C20orf7.qAug10	uc002wom.2,uc002won.2,uc002woo.2	1.39697	2.53561	2.35836	19.8402	4.65539e-19	1.41989e-17
4:140278709:+,4:140280897:+	NAA15	core	NM_057175	ENST00000296543,ENST00000398947,ENST00000468029,ENST00000544077	NAA15.aAug10,NAA15.bAug10,NAA15.dAug10	uc003ihu.1	1.48611	2.02848	2.78125	19.8381	4.66914e-19	1.42321e-17
5:10394897:+,5:10402171:+	2017-03-06	novel	NONE	NONE	NONE	NONE	0.279326	8.77753	-2.13955	19.824	4.765e-19	1.44991e-17
1:16456914:+,1:16458216:+	EPHA2	core	NM_004431	ENST00000358432	EPHA2.aAug10	uc001aya.1	1.80946	2.35069	2.4556	19.8236	4.76736e-19	1.45021e-17
3:156392585:+,3:156411809:+	LOC100287227,TIPARP	novel	NONE	NONE	NONE	NONE	1.65786	9.14612	-1.95604	19.8226	4.77444e-19	1.45162e-17
17:79846294:+,17:79847058:+	THOC4	novel	NONE	NONE	NONE	NONE	0.274375	8.62796	-2.21282	19.8226	4.77477e-19	1.45162e-17
20:34313077:+,20:34319863:+	RBM39	novel	NONE	NONE	NONE	NONE	0.714398	9.58243	-1.73796	19.814	4.83418e-19	1.46672e-17	Figure 5B
10:120819230:+,10:120824911:+	EIF3A	novel	NONE	NONE	NONE	NONE	1.57881	8.75351	-2.15178	19.8112	4.8534e-19	1.47085e-17
7:158447950:+,7:158448952:+	NCAPG2	novel	NONE	NONE	NONE	NONE	0.126829	8.58328	-2.23554	19.8104	4.8589e-19	1.4721e-17
1:85824530:+,1:86043667:+	DDAH1	extended	None	None	DDAH1.bAug10,DDAH1.gAug10	None	0.567011	4.61815	1.13001	19.8088	4.8703e-19	1.47512e-17
11:47772842:+,11:47774468:+	FNBP4	core	NM_015308	ENST00000263773,ENST00000534003	FNBP4.aAug10,FNBP4.bAug10,FNBP4.cAug10	uc001ngj.2,uc001ngl.2,uc009ylv.2	2.14053	2.19631	2.67304	19.7984	4.94352e-19	1.49515e-17
3:170099129:+,3:170102321:+	SKIL	core	NM_001145097,NM_001145098,NM_001248008,NM_005414	ENST00000259119,ENST00000413427,ENST00000426052,ENST00000458537,ENST00000490894	SKIL.aAug10,SKIL.bAug10,SKIL.cAug10,SKIL.dAug10,SKIL.gAug10	uc003fgu.2,uc003fgv.2,uc003fgw.2,uc011bps.1	2.89546	3.05109	2.04599	19.7958	4.96271e-19	1.50009e-17
16:8895767:+,16:8906848:+	PMM2	novel	NONE	NONE	NONE	NONE	-1.11754	8.72472	-2.16606	19.7897	5.00606e-19	1.51276e-17
1:243375266:+,1:243385026:+	CEP170	core	NM_001042404,NM_001042405,NM_014812	ENST00000366542,ENST00000366543,ENST00000366544,ENST00000424081,ENST00000522191,ENST00000522522,ENST00000522995,ENST00000523424,ENST00000532008	CEP170.aAug10,CEP170.bAug10,CEP170.cAug10,CEP170.dAug10,CEP170.oAug10,CEP170.pAug10,CEP170.sAug10,CEP170.tAug10,CEP170.vaAug10	uc001hzs.2,uc001hzt.2,uc001hzu.2	1.43827	2.00736	2.96799	19.7829	5.05516e-19	1.52628e-17
8:8197151:+,8:8233763:+	SGK223	core	NM_001080826	ENST00000330777,ENST00000520004	SGK223.aAug10	uc003wsh.3	2.18495	2.37648	2.64509	19.7817	5.06444e-19	1.52864e-17
1:179820498:+,1:179821767:+	TOR1AIP2	core	NM_001199260,NM_145034	ENST00000367612	TOR1AIP2.aAug10,TOR1AIP2.bAug10,TOR1AIP2.iAug10	uc001gnk.2,uc001gnl.2	2.7974	3.13066	1.7993	19.7735	5.1243e-19	1.54627e-17
12:96617551:+,12:96640718:+	ELK3	core	NM_005230	ENST00000228741,ENST00000547860	ELK3.aAug10,ELK3.bAug10,ELK3.cAug10,ELK3.fAug10	uc001teo.1	2.11873	2.02499	3.02465	19.7622	5.2089e-19	1.56999e-17
2:74699379:+,2:74699696:+	MRPL53	extended	None	ENST00000409710	CCDC142andMRPL53.kAug10	None	0.43394	4.487	1.24713	19.7619	5.21068e-19	1.57008e-17
11:120327959:+,11:120328789:+	ARHGEF12	novel	NONE	NONE	NONE	NONE	0.318922	8.62717	-2.21349	19.7486	5.31204e-19	1.59971e-17
3:156868170:+,3:156869966:+	CCNL1	core	NM_020307	ENST00000295926,ENST00000461804,ENST00000464316,ENST00000464679,ENST00000476367,ENST00000477127,ENST00000479052	CCNL1.aAug10,CCNL1.bAug10,CCNL1.cAug10,CCNL1.gAug10,CCNL1.jAug10,CCNL1.kAug10,CCNL1.qAug10,CCNL1.vbAug10	uc003fbd.1,uc003fbe.2,uc003fbf.2,uc003fbi.1	1.62486	2.73075	2.09423	19.7463	5.32989e-19	1.60416e-17
13:31205611:+,13:31211881:+	USPL1	core	NM_005800	ENST00000255304	USPL1.aAug10,USPL1.dAug10	uc001utb.2,uc001utc.2	2.88417	2.6811	2.30041	19.7459	5.33254e-19	1.6045e-17
2:88870559:+,2:88874184:+	EIF2AK3	core	NM_004836	ENST00000303236,ENST00000415570,ENST00000419748,ENST00000470706,ENST00000535951	EIF2AK3.aAug10,EIF2AK3.bAug10,EIF2AK3.cAug10	uc002stc.3	2.82567	2.48028	2.36149	19.7411	5.36949e-19	1.61378e-17
14:103932130:+,14:103932680:+	MARK3	novel	NONE	NONE	NONE	NONE	0.227578	9.79219	-0.695512	19.7387	5.3887e-19	1.61863e-17
X:153586723:+,X:153587352:+	FLNA	novel	NONE	NONE	NONE	NONE	0.227357	8.52255	-2.26657	19.7341	5.42401e-19	1.62877e-17
1:78031866:+,1:78034017:+	ZZZ3	core	NM_015534	ENST00000370798,ENST00000370801,ENST00000476275,ENST00000481346	ZZZ3.aAug10,ZZZ3.bAug10,ZZZ3.cAug10,ZZZ3.dAug10,ZZZ3.fAug10,ZZZ3.gAug10,ZZZ3.hAug10,ZZZ3.iAug10,ZZZ3.kAug10	uc001dhp.2,uc001dhq.2,uc001dhr.2	1.33397	2.25857	2.35826	19.7263	5.48609e-19	1.646e-17
22:41558783:+,22:41560057:+	EP300	core	NM_001429	ENST00000263253	EP300.aAug10,EP300.cAug10	uc003azl.3	2.20621	2.41599	2.51879	19.7212	5.52631e-19	1.65647e-17
3:185643414:+,3:185655613:+	TRA2B	core	NM_001243879	ENST00000382191,ENST00000465245	TRA2B.eAug10,TRA2B.kAug10	uc010hym.2	1.68535	3.88249	1.75803	19.716	5.56849e-19	1.66739e-17
7:143080415:+,7:143085582:+	ZYX	novel	NONE	NONE	NONE	NONE	-0.322367	8.78408	-2.13683	19.7049	5.65789e-19	1.69133e-17
17:78112961:+,17:78113807:+	EIF4A3	novel	NONE	NONE	NONE	NONE	0.900288	8.74445	-2.15618	19.7049	5.65807e-19	1.69133e-17
9:82189851:+,9:82267505:+	TLE4	novel	NONE	NONE	NONE	NONE	0.699885	8.68692	-2.18288	19.6985	5.71078e-19	1.70563e-17
1:16456084:+,1:16456721:+	EPHA2	core	NM_004431	ENST00000358432	EPHA2.aAug10	uc001aya.1	1.80946	2.04142	2.7484	19.685	5.82323e-19	1.73577e-17
12:110934008:+,12:110939854:+	VPS29	core	NM_016226	ENST00000548259,ENST00000549578	VPS29.kAug10,VPS29.mAug10,VPS29.nAug10	uc001tqy.2	0.66604	2.29924	2.43326	19.6846	5.82667e-19	1.7363e-17
5:55247432:+,5:55250638:+	IL6ST	novel	NONE	NONE	NONE	NONE	1.90077	8.56833	-2.2425	19.6717	5.93658e-19	1.76655e-17
6:101248380:+,6:101253636:+	ASCC3	core	NM_006828	ENST00000324696,ENST00000369162,ENST00000522650	ASCC3.aAug10,ASCC3.bAug10,ASCC3.cAug10	uc003pqk.2,uc003pql.2,uc011eai.1	1.11354	2.13505	2.71092	19.6488	6.13722e-19	1.82265e-17
X:1713117:+,X:1714277:+	AKAP17A	core	NM_005088,NR_027383	ENST00000313871,ENST00000381261,ENST00000474361	SFRS17AandASMT.1.aAug10,SFRS17AandASMT.1.bAug10,SFRS17AandASMT.1.cAug10,SFRS17AandASMT.1.fAug10	uc004cqa.2,uc004cqb.2,uc010ncx.1	2.50986	2.56934	2.27111	19.6479	6.14571e-19	1.82466e-17
10:61572553:+,10:61574410:+	CCDC6	core	NM_005436	ENST00000263102	CCDC6.aAug10,CCDC6.bAug10,CCDC6.eAug10	uc001jks.3	1.81281	2.09001	2.74558	19.6265	6.33904e-19	1.87781e-17
15:67495236:+,15:67496382:+	AAGAB	novel	NONE	NONE	NONE	NONE	0.305428	9.06259	-1.99558	19.609	6.50182e-19	1.92157e-17
5:150078193:+,5:150080006:+	RBM22	novel	NONE	NONE	NONE	NONE	1.19936	8.67302	-2.19179	19.6034	6.55491e-19	1.93631e-17
4:170057771:+,4:170076631:+	SH3RF1	core	NM_020870	ENST00000284637,ENST00000508685,ENST00000511421	SH3RF1.aAug10,SH3RF1.bAug10	uc003isa.1,uc010irc.1	3.15288	3.21211	1.74991	19.5963	6.62291e-19	1.95475e-17
3:194180700:+,3:194181387:+	ATP13A3	core	NM_024524	ENST00000256031,ENST00000310773,ENST00000439040,ENST00000457986	ATP13A3.aAug10,ATP13A3.fAug10	uc003fty.3	1.71466	2.03279	3.29571	19.5921	6.6636e-19	1.96456e-17
4:142142262:+,4:142147921:+	ZNF330	novel	NONE	NONE	NONE	NONE	0.139909	8.53515	-2.25973	19.5914	6.67034e-19	1.96599e-17
10:3821782:+,10:3822298:+	KLF6	core	NM_001160124,NM_001300,NR_027653	ENST00000173785,ENST00000461124,ENST00000492125,ENST00000497571	KLF6.aAug10,KLF6.bAug10,KLF6.cAug10,KLF6.fAug10,KLF6.hAug10	uc001iha.2,uc010qak.1,uc010qal.1	1.84061	2.3911	2.44778	19.5877	6.7069e-19	1.97566e-17
11:62620153:+,11:62620547:+	SNHG1	extended	None	ENST00000538266	SNHG1_.bAug10	None	-0.152273	6.84837	0.958836	19.5846	6.73689e-19	1.98394e-17
8:20070416:+,8:20074731:+	ATP6V1B2	novel	NONE	NONE	NONE	NONE	-0.0743293	8.71883	-2.16927	19.5825	6.75808e-19	1.98963e-17
12:69218210:+,12:69222551:+	MDM2	extended	None	ENST00000537182	None	None	2.96722	8.24962	0.486365	19.5777	6.80472e-19	2.00224e-17
17:45750531:+,17:45752004:+	KPNB1	extended	None	None	KPNB1.gAug10	None	-0.330695	6.32818	0.888678	19.5745	6.83643e-19	2.01101e-17
14:23551045:+,14:23559731:+	ACIN1	core	NM_001164815	ENST00000457657	ACIN1.cAug10	uc010tnj.1	0.933987	2.00144	2.96856	19.5738	6.8437e-19	2.01258e-17
10:112362760:+,10:112363989:+	SMC3	novel	NONE	NONE	NONE	NONE	-0.387308	8.59864	-2.22926	19.5725	6.85678e-19	2.01586e-17
16:11990642:+,16:12009226:+	GSPT1	novel	NONE	NONE	NONE	NONE	0.238649	8.84066	-2.10736	19.5637	6.94459e-19	2.03883e-17
10:90771838:+,10:90773876:+	FAS	core	NM_152872	ENST00000355279	STAMBPL1andFAS.nAug10	uc001kfs.2	2.25982	8.86341	-2.09419	19.5489	7.09603e-19	2.07981e-17
7:135614760:+,7:135636265:+	LUZP6,MTPN	novel	NONE	NONE	NONE	NONE	1.18905	8.47758	-2.28926	19.5448	7.13909e-19	2.09068e-17
8:103225117:+,8:103226282:+	RRM2B	core	NM_001172477,NM_001172478,NM_015713	ENST00000251810,ENST00000395910,ENST00000395912,ENST00000519125,ENST00000519317,ENST00000522368,ENST00000535248	RRM2B.aAug10,RRM2B.bAug10,RRM2B.cAug10,RRM2B.dAug10,RRM2B.eAug10,RRM2B.fAug10,RRM2B.gAug10,RRM2B.hAug10	uc003ykn.2,uc003yko.2,uc010mbv.1,uc010mbw.1	2.42751	2.0852	2.71181	19.5397	7.19225e-19	2.10332e-17
6:30572512:+,6:30573700:+	PPP1R10	novel	NONE	NONE	NONE	NONE	0.752418	8.54844	-2.2541	19.5356	7.23557e-19	2.1154e-17
22:41565620:+,22:41566410:+	EP300	core	NM_001429	ENST00000263253	EP300.aAug10	uc003azl.3	2.20621	2.07096	2.63119	19.5272	7.3247e-19	2.13909e-17
12:88939642:+,12:88974041:+	KITLG	core	NM_000899,NM_003994	ENST00000228280,ENST00000347404	KITLG.aAug10,KITLG.bAug10,KITLG.dAug10,KITLG.fAug10	uc001tav.2,uc001taw.2	3.45509	3.27046	1.89747	19.5113	7.49622e-19	2.1837e-17
7:123336801:+,7:123344688:+	WASL	core	NM_003941	ENST00000223023,ENST00000536685	WASL.aAug10	uc003vkz.2	1.98815	2.14626	2.82115	19.5111	7.49823e-19	2.1837e-17
6:160198488:+,6:160199691:+	ACAT2,TCP1	novel	NONE	NONE	NONE	NONE	-0.67226	8.44291	-2.30635	19.5099	7.51141e-19	2.18693e-17
12:121132803:+,12:121134119:+	MLEC	extended	None	ENST00000535656	MLEC.cAug10	None	0.850909	6.01727	1.0141	19.5055	7.56017e-19	2.19942e-17
1:183861295:+,1:183866942:+	RGL1	core	NM_015149	ENST00000304685,ENST00000360851,ENST00000367531,ENST00000536277,ENST00000539189,ENST00000543395	RGL1.aAug10,RGL1.bAug10,RGL1.cAug10,RGL1.dAug10,RGL1.eAug10,RGL1.gAug10	uc001gqm.2,uc001gqo.2,uc010pof.1,uc010pog.1,uc010poh.1,uc010poi.1	2.33894	2.89287	1.97914	19.5054	7.56056e-19	2.19942e-17
10:120085755:+,10:120095694:+	C10orf84	novel	NONE	NONE	NONE	NONE	0.137885	8.62889	-2.21356	19.4976	7.64794e-19	2.22202e-17
14:52156653:+,14:52167774:+	FRMD6	novel	NONE	NONE	NONE	NONE	2.63454	8.92101	-2.06871	19.4846	7.79438e-19	2.25807e-17
10:1046808:+,10:1051758:+	GTPBP4	novel	NONE	NONE	NONE	NONE	1.64336	8.46234	-2.29564	19.4743	7.9118e-19	2.28677e-17
8:105503767:+,8:105507305:+	LRP12	core	NM_001135703,NM_013437	ENST00000276654,ENST00000424843,ENST00000518375,ENST00000522046,ENST00000523007	LRP12.aAug10,LRP12.bAug10,LRP12.cAug10	uc003ylz.2,uc003yma.2,uc003ymb.2	1.79425	2.04573	2.84129	19.4724	7.93398e-19	2.29158e-17
7:156746992:+,7:156752545:+	NOM1	core	NM_138400	ENST00000275820	NOM1.aAug10,NOM1.bAug10	uc003wmy.2	0.17583	2.42213	2.33135	19.4719	7.93983e-19	2.29203e-17
6:114270424:+,6:114281070:+	HDAC2	novel	NONE	NONE	NONE	NONE	-0.380129	8.82812	-2.11494	19.4719	7.93992e-19	2.29203e-17
4:177138160:+,4:177142601:+	ASB5	novel	NONE	NONE	NONE	NONE	1.5987	4.87485	1.37941	19.4654	8.01612e-19	2.31276e-17
19:19757156:+,19:19758223:+	ATP13A1	novel	NONE	NONE	NONE	NONE	0.608787	8.41739	-2.31913	19.464	8.03185e-19	2.31667e-17
7:33057213:+,7:33060884:+	NT5C3	novel	NONE	NONE	NONE	NONE	-0.677339	8.41732	-2.31845	19.4518	8.17696e-19	2.35594e-17
8:98831466:+,8:98863625:+	LAPTM4B	novel	NONE	NONE	NONE	NONE	1.22228	8.60639	-2.22328	19.4447	8.2625e-19	2.3788e-17
8:42260979:+,8:42262889:+	VDAC3	novel	NONE	NONE	NONE	NONE	-0.208998	10.0692	-0.436724	19.4446	8.26309e-19	2.3788e-17	Figure 5E
5:34909053:+,5:34911659:+	RAD1	novel	NONE	NONE	NONE	NONE	-0.057108	8.41209	-2.32179	19.4418	8.29675e-19	2.38653e-17
8:95952448:+,8:95953058:+	TP53INP1	core	NM_001135733,NM_033285	ENST00000342697,ENST00000378776,ENST00000448464	TP53INP1.aAug10,TP53INP1.bAug10,TP53INP1.cAug10	uc003yhg.2,uc003yhh.2	3.64076	3.08314	1.80146	19.4414	8.30172e-19	2.38705e-17
7:26232993:+,7:26235467:+	HNRNPA2B1	novel	NONE	NONE	NONE	NONE	0.293152	3.6801	1.50082	19.4413	8.3031e-19	2.38705e-17
5:43299077:+,5:43313458:+	HMGCS1	core	NM_002130	ENST00000433297,ENST00000507004,ENST00000545275	HMGCS1.bAug10,HMGCS1.kAug10	uc003jnq.3	0.943531	2.2435	2.37994	19.441	8.3072e-19	2.38723e-17
3:195388712:+,3:195389442:+	SDHAP2	core	NR_003265	ENST00000414625,ENST00000425425,ENST00000429897,ENST00000445430,ENST00000452844,ENST00000453324,ENST00000455183,ENST00000457233	SDHAP2andMUC20.dAug10,SDHAP2andMUC20.eAug10,SDHAP2andMUC20.fAug10,SDHAP2andMUC20.nAug10,SDHAP2andMUC20.oAug10,SDHAP2andMUC20.vfAug10,SDHAP2andMUC20.vkAug10,SDHAP2andMUC20.vnAug10,SDHAP2andMUC20.voAug10,SDHAP2andMUC20.vqAug10,SDHAP2andMUC20.vuAug10,SDHAP2andMUC20.vvAug10,SDHAP2andMUC20.vwAug10,SDHAP2andMUC20.vxAug10,SDHAP2andMUC20.waAug10	uc003fut.3,uc003fuu.3,uc003fuv.2,uc003fuw.2	2.01632	3.26032	1.52857	19.4409	8.30827e-19	2.38723e-17
11:128356041:+,11:128360352:+	ETS1	novel	NONE	NONE	NONE	NONE	2.39711	9.24327	-1.90781	19.4356	8.37338e-19	2.40528e-17
15:79186572:+,15:79189325:+	MORF4L1	novel	NONE	NONE	NONE	NONE	0.0135637	9.70096	-0.741484	19.4326	8.40947e-19	2.41433e-17
8:71496028:+,8:71499341:+	TRAM1	novel	NONE	NONE	NONE	NONE	0.983049	8.42711	-2.31337	19.4268	8.48207e-19	2.43318e-17
11:85420543:+,11:85429833:+	SYTL2	extended	None	ENST00000530894	SYTL2.uAug10	None	-0.556421	2.33053	2.58706	19.4231	8.52704e-19	2.44475e-17
6:72003314:+,6:72006375:+	OGFRL1	novel	NONE	NONE	NONE	NONE	1.26645	8.56538	-2.24598	19.4159	8.61807e-19	2.46682e-17
1:150318612:+,1:150318884:+	PRPF3	core	NM_004698	ENST00000324862,ENST00000414970,ENST00000467329	PRPF3.aAug10,PRPF3.bAug10,PRPF3.cAug10,PRPF3.eAug10,PRPF3.fAug10	uc001eum.3,uc010pca.1,uc010pcb.1	2.44204	2.06661	2.75623	19.4126	8.65999e-19	2.47814e-17
6:30557990:+,6:30558312:+	ABCF1	novel	NONE	NONE	NONE	NONE	0.518308	8.55187	-2.25076	19.4069	8.73258e-19	2.49688e-17
14:45576819:+,14:45578819:+	PRPF39	novel	NONE	NONE	NONE	NONE	2.37791	8.44673	-2.30414	19.4064	8.7388e-19	2.49798e-17
1:203787817:+,1:203797427:+	ZC3H11A	core	NM_014827	ENST00000332127,ENST00000367210,ENST00000367212,ENST00000367214,ENST00000453771,ENST00000495527,ENST00000537080,ENST00000545588	ZC3H11A.bAug10,ZC3H11A.cAug10,ZC3H11A.dAug10,ZC3H11A.eAug10,ZC3H11A.gAug10,ZC3H11A.lAug10	uc001hac.2,uc001had.2,uc001hae.2,uc001haf.2,uc001hag.1,uc010pqm.1	1.71202	2.10347	2.98291	19.4052	8.75445e-19	2.50109e-17
7:100884187:+,7:100888241:+	FIS1	extended	None	ENST00000449367	FIS1.mAug10	None	1.08034	2.38386	2.23307	19.3955	8.87935e-19	2.53334e-17
8:81905542:+,8:81942231:+	PAG1	core	NM_018440	ENST00000220597	PAG1.bAug10,PAG1.dAug10	uc003ybz.2	2.96417	3.39144	1.63115	19.391	8.93891e-19	2.54826e-17
18:23615091:+,18:23619253:+	SS18	novel	NONE	NONE	NONE	NONE	0.818473	8.93107	-2.06342	19.3906	8.94337e-19	2.54884e-17
15:42512333:+,15:42519909:+	TMEM87A	novel	NONE	NONE	NONE	NONE	0.787612	8.43163	-2.31111	19.3847	9.02153e-19	2.56763e-17
12:116445441:+,12:116446206:+	MED13L	core	NM_015335	ENST00000281928	MED13L.aAug10	uc001tvw.2	1.76045	2.54174	2.17184	19.3839	9.03193e-19	2.56851e-17
22:41513825:+,22:41521868:+	EP300	core	NM_001429	ENST00000263253	EP300.aAug10,EP300.hAug10	uc003azl.3	2.20621	2.37327	2.21801	19.3688	9.23403e-19	2.62032e-17
4:76582198:+,4:76584027:+	G3BP2	novel	NONE	NONE	NONE	NONE	0.229977	8.7043	-2.17388	19.368	9.2449e-19	2.6227e-17
19:49993179:+,19:49993732:+	RPL13A,RPL13AP5	novel	NONE	NONE	NONE	NONE	0.905372	5.17565	1.3584	19.3587	9.37288e-19	2.65471e-17
8:103277506:+,8:103281206:+	UBR5	novel	NONE	NONE	NONE	NONE	0.525069	8.64016	-2.20861	19.3537	9.44181e-19	2.67064e-17
2:37480493:+,2:37483805:+	PRKD3	novel	NONE	NONE	NONE	NONE	0.913532	8.69158	-2.18321	19.3533	9.4472e-19	2.67144e-17
1:179816771:+,1:179819980:+	TOR1AIP2	core	NM_001199260,NM_145034	ENST00000367612	TOR1AIP2.aAug10,TOR1AIP2.bAug10	uc001gnk.2,uc001gnl.2	2.7974	3.10012	1.58029	19.353	9.45118e-19	2.67185e-17
14:91928565:+,14:91929079:+	SMEK1	extended	None	ENST00000555718	SMEK1.eAug10	None	3.02269	6.5276	1.18903	19.3422	9.6027e-19	2.71177e-17	Figure S6
2:10582300:+,2:10583616:+	ODC1	novel	NONE	NONE	NONE	NONE	-0.229375	8.79214	-2.13309	19.3418	9.60793e-19	2.71252e-17
7:19739903:+,7:19744402:+	TWISTNB	core	NM_001002926	ENST00000222567	TWISTNB.aAug10	uc003sup.1	2.20736	2.20176	2.59457	19.3288	9.79371e-19	2.76052e-17
9:69256889:+,9:69259222:+	CBWD6	core	NM_001085457	ENST00000377441,ENST00000377445,ENST00000377449,ENST00000377450,ENST00000377457,ENST00000382399,ENST00000466320,ENST00000470192,ENST00000473839,ENST00000476973,ENST00000480351,ENST00000495626,ENST00000536466	CBWD6.aAug10,CBWD6.bAug10,CBWD6.cAug10,CBWD6.dAug10,CBWD6.eAug10,CBWD6.fAug10,CBWD6.gAug10,CBWD6.hAug10,CBWD6.jAug10,CBWD6.kAug10,CBWD6.lAug10,CBWD6.nAug10,CBWD6.oAug10,CBWD6.uAug10,CBWD6.vaAug10	uc004afj.3,uc004afk.3,uc004afl.3,uc011lrf.1	0.49404	2.70269	1.99347	19.3274	9.81315e-19	2.76496e-17
1:120484377:+,1:120493347:+	NOTCH2	novel	NONE	NONE	NONE	NONE	1.25141	8.40572	-2.32519	19.3273	9.81469e-19	2.76496e-17
9:5465606:+,9:5467840:+	CD274	novel	NONE	NONE	NONE	NONE	1.24314	8.54164	-2.25612	19.3245	9.85557e-19	2.77499e-17
10:112769143:+,10:112771368:+	SHOC2	novel	NONE	NONE	NONE	NONE	1.30163	8.64865	-2.20416	19.3095	1.0076e-18	2.831e-17
9:128001812:+,9:128002955:+	HSPA5	novel	NONE	NONE	NONE	NONE	2.31729	9.76504	-0.709747	19.3077	1.01026e-18	2.83543e-17
12:88926280:+,12:88974041:+	KITLG	novel	NONE	NONE	NONE	NONE	3.45509	8.39525	-2.33054	19.3063	1.01229e-18	2.84038e-17
18:21057050:+,18:21059281:+	RIOK3	novel	NONE	NONE	NONE	NONE	1.42449	8.86054	-2.09905	19.3049	1.01445e-18	2.84567e-17
17:79827282:+,17:79827617:+	ARHGDIA	novel	NONE	NONE	NONE	NONE	0.533241	8.97526	-2.04011	19.303	1.01729e-18	2.85138e-17
17:5264970:+,17:5268417:+	RABEP1	novel	NONE	NONE	NONE	NONE	0.99944	8.63978	-2.20847	19.302	1.01868e-18	2.85452e-17
2:15732073:+,2:15735614:+	DDX1	novel	NONE	NONE	NONE	NONE	-0.680417	8.50364	-2.27624	19.2961	1.02762e-18	2.87572e-17
20:485873:+,20:524316:+	CSNK2A1	core	NM_177560	ENST00000400217,ENST00000460062	CSNK2A1.dAug10,CSNK2A1.lAug10	uc002wdy.1	1.86031	4.09256	1.18933	19.2909	1.03549e-18	2.89543e-17
5:55247903:+,5:55250638:+	IL6ST	novel	NONE	NONE	NONE	NONE	1.90077	8.70737	-2.17547	19.2879	1.04017e-18	2.90697e-17
17:30687986:+,17:30689933:+	ZNF207	core	NM_003457	ENST00000342555,ENST00000394673	ZNF207.dAug10,ZNF207.jAug10	uc002hhh.3	-0.0501608	5.27378	0.957134	19.2847	1.04508e-18	2.91991e-17
8:126030969:+,8:126033995:+	SQLE	novel	NONE	NONE	NONE	NONE	0.767859	8.36916	-2.34341	19.2817	1.0496e-18	2.93023e-17
8:125334388:+,8:125342989:+	TMEM65	novel	NONE	NONE	NONE	NONE	-0.137297	8.36394	-2.3458	19.2803	1.05191e-18	2.93588e-17
4:39776553:+,4:39779980:+	UBE2K	core	NM_001111112	ENST00000445950	UBE2K.cAug10	uc003gus.3	1.973	8.85327	-2.10218	19.2744	1.061e-18	2.95812e-17
5:135397268:+,5:135398352:+	TGFBI	core	NM_000358	ENST00000398813,ENST00000442011,ENST00000504205,ENST00000504411,ENST00000506699,ENST00000507018,ENST00000508076	TGFBI.aAug10,TGFBI.bAug10,TGFBI.cAug10,TGFBI.eAug10,TGFBI.iAug10,TGFBI.lAug10,TGFBI.oAug10	uc003lbf.3,uc003lbg.3,uc003lbh.3,uc010jee.2,uc011cyb.1	2.29582	2.23996	2.54076	19.2711	1.06616e-18	2.97093e-17
2:231655751:+,2:231657928:+	CAB39	core	NM_001130849,NM_001130850,NM_016289	ENST00000258418,ENST00000409788,ENST00000410084,ENST00000478152	CAB39.aAug10,CAB39.bAug10,CAB39.cAug10,CAB39.dAug10	uc002vqx.2,uc010fxq.2,uc010fxr.2	2.21845	2.0337	2.7498	19.2707	1.0668e-18	2.97194e-17
10:112341856:+,10:112343142:+	SMC3	novel	NONE	NONE	NONE	NONE	-0.387308	9.03716	-2.00709	19.2702	1.06759e-18	2.97333e-17
12:6439877:+,12:6442533:+	TNFRSF1A	novel	NONE	NONE	NONE	NONE	0.098626	8.66952	-2.19351	19.2671	1.07243e-18	2.98524e-17
20:476446:+,20:479899:+	CSNK2A1	novel	NONE	NONE	NONE	NONE	1.86031	8.44999	-2.30298	19.2597	1.0842e-18	3.01641e-17
7:139268810:+,7:139281463:+	HIPK2	core	NM_001113239,NM_022740	ENST00000406875,ENST00000428878	HIPK2.aAug10,HIPK2.bAug10,HIPK2.cAug10,HIPK2.dAug10	uc003vvd.3,uc003vvf.3	2.56602	2.61432	2.02694	19.2581	1.08679e-18	3.02201e-17
20:44443109:+,20:44444493:+	UBE2C	extended	None	None	UBE2C.jAug10	None	-1.08954	3.80396	1.52055	19.2562	1.08983e-18	3.02968e-17
2:238285987:+,2:238289558:+	COL6A3	core	NM_057166	ENST00000346358,ENST00000433762,ENST00000472056	COL6A3.cAug10,COL6A3.fAug10	uc010znj.1,uc010znk.1	2.01483	2.17281	2.61451	19.2559	1.09044e-18	3.03057e-17
7:32591035:+,7:32591841:+	AVL9	core	NM_015060	ENST00000318709,ENST00000329714,ENST00000404479,ENST00000409301,ENST00000446718,ENST00000485228	AVL9.aAug10,AVL9.bAug10,AVL9.cAug10,AVL9.mAug10	uc003tcv.1,uc010kwj.1,uc011kai.1	1.58185	2.16994	2.53627	19.2557	1.09073e-18	3.03057e-17
5:5423112:+,5:5436531:+	KIAA0947	core	NM_015325	ENST00000296564,ENST00000505464	KIAA0947.fAug10	uc003jdm.3	1.49855	3.6238	1.67105	19.2548	1.09221e-18	3.03388e-17
14:59105265:+,14:59107454:+	DACT1	core	NM_001079520,NM_016651	ENST00000335867,ENST00000395153	DACT1.aAug10,DACT1.bAug10	uc001xdw.2,uc001xdx.2	2.93007	3.03792	1.82429	19.2497	1.1004e-18	3.05421e-17
12:57910963:+,12:57911489:+	DDIT3	novel	NONE	NONE	NONE	NONE	1.96158	9.38466	-1.83695	19.2362	1.12247e-18	3.10972e-17
8:71495559:+,8:71499130:+	TRAM1	novel	NONE	NONE	NONE	NONE	0.983049	5.76656	0.992457	19.2329	1.12806e-18	3.1244e-17
5:151170623:+,5:151175040:+	G3BP1	extended	None	ENST00000520177,ENST00000522367	G3BP1.fAug10	uc010jhz.2	0.72602	8.82197	-2.11834	19.2268	1.13818e-18	3.15076e-17
1:243319757:+,1:243327586:+	CEP170	core	NM_001042404,NM_014812	ENST00000336415,ENST00000366542,ENST00000366544	CEP170.aAug10,CEP170.bAug10,CEP170.hAug10,CEP170.mAug10	uc001hzs.2,uc001hzu.2	1.43827	2.24158	2.75726	19.2177	1.15361e-18	3.18762e-17
11:46780593:+,11:46782162:+	CKAP5	novel	NONE	NONE	NONE	NONE	-0.615706	8.96112	-2.04838	19.2163	1.15605e-18	3.19351e-17
12:88926280:+,12:88939529:+	KITLG	core	NM_000899,NM_003994	ENST00000228280,ENST00000347404,ENST00000552044	KITLG.aAug10,KITLG.bAug10,KITLG.fAug10,KITLG.hAug10	uc001tav.2,uc001taw.2	3.45509	2.67385	2.05976	19.2069	1.17223e-18	3.2348e-17
12:69764578:+,12:69783927:+	YEATS4	novel	NONE	NONE	NONE	NONE	-1.20134	9.44305	0.186408	19.2024	1.17997e-18	3.25408e-17
3:137882336:+,3:137885923:+	DBR1	novel	NONE	NONE	NONE	NONE	0.920981	8.34722	-2.35323	19.1911	1.19991e-18	3.30253e-17
7:129479175:+,7:129519408:+	UBE2H	core	NM_182697	ENST00000473814	UBE2H.cAug10	uc003vpg.1	0.903723	4.7569	1.06356	19.1811	1.21776e-18	3.34903e-17
22:39908499:+,22:39909522:+	SMCR7L	core	NM_019008	ENST00000325301,ENST00000402881,ENST00000404569,ENST00000428069,ENST00000433117	SMCR7L.aAug10,SMCR7L.bAug10,SMCR7L.cAug10,SMCR7L.fAug10,SMCR7L.gAug10	uc003axw.2,uc003axx.2,uc003axy.2,uc010gxz.1	1.84484	2.13479	2.5573	19.1764	1.22638e-18	3.36833e-17
10:13658553:+,10:13672260:+	PRPF18	core	NM_003675	ENST00000298451,ENST00000378572	PRPF18.aAug10,PRPF18.bAug10	uc001imp.2	2.0355	2.26297	2.54679	19.1728	1.23293e-18	3.38371e-17
3:49397815:+,3:49405861:+	RHOA	novel	NONE	NONE	NONE	NONE	1.28427	6.23074	0.64984	19.1728	1.23294e-18	3.38371e-17
14:21863278:+,14:21863976:+	CHD8	novel	NONE	NONE	NONE	NONE	0.412133	8.52124	-2.26793	19.1724	1.23368e-18	3.38485e-17
2:189943833:+,2:189945716:+	COL5A2	novel	NONE	NONE	NONE	NONE	1.2239	8.5022	-2.27772	19.1713	1.23562e-18	3.38928e-17
16:11990642:+,16:11991851:+	GSPT1	novel	NONE	NONE	NONE	NONE	0.238649	8.40398	-2.32453	19.1621	1.2526e-18	3.43407e-17
1:154318021:+,1:154318707:+	ATP8B2	novel	NONE	NONE	NONE	NONE	0.402356	8.3677	-2.34391	19.1543	1.26723e-18	3.46786e-17
5:132223852:+,5:132227856:+	AFF4	novel	NONE	NONE	NONE	NONE	0.989938	8.48295	-2.28565	19.1411	1.29217e-18	3.52877e-17
19:9408155:+,19:9413054:+	ZNF699	novel	NONE	NONE	NONE	NONE	2.75309	8.35702	-2.3497	19.139	1.2963e-18	3.53912e-17
9:86593194:+,9:86595418:+	HNRNPK	extended	None	None	HNRNPK.rAug10	None	0.611671	8.35685	-2.34988	19.1306	1.31246e-18	3.57954e-17
X:11136740:+,X:11139732:+	HCCS	novel	NONE	NONE	NONE	NONE	0.769769	8.99797	-2.03052	19.1255	1.32252e-18	3.60543e-17
1:100515560:+,1:100524222:+	HIAT1	core	NM_033055	ENST00000370152	HIAT1.aAug10,HIAT1.dAug10	uc001dst.2	1.6535	2.13951	2.6193	19.1254	1.32264e-18	3.60543e-17
13:110823079:+,13:110826247:+	COL4A1	novel	NONE	NONE	NONE	NONE	1.62663	8.40332	-2.32634	19.1231	1.32716e-18	3.61681e-17
22:41564603:+,22:41564725:+	EP300	core	NM_001429	ENST00000263253	EP300.aAug10,EP300.cAug10	uc003azl.3	2.20621	2.27572	2.61159	19.1179	1.33739e-18	3.64187e-17
8:90798914:+,8:90801549:+	RIPK2	core	NM_003821	ENST00000220751,ENST00000522965,ENST00000540020	RIPK2.aAug10,RIPK2.bAug10	uc003yee.2,uc003yef.2	1.88115	2.00473	2.7704	19.1176	1.33793e-18	3.64239e-17
13:39591681:+,13:39597189:+	C13orf23	novel	NONE	NONE	NONE	NONE	0.0815076	8.3879	-2.33392	19.1127	1.34771e-18	3.66523e-17
4:187630999:+,4:187647508:+	FAT1	extended	None	ENST00000509647	FAT1.dAug10	uc010iso.1	1.07457	2.12933	3.46296	19.1087	1.35587e-18	3.68552e-17
12:53849154:+,12:53849669:+	PCBP2	novel	NONE	NONE	NONE	NONE	-0.100747	10.4292	-0.0795299	19.1029	1.36748e-18	3.7142e-17
6:86387210:+,6:86387854:+	SNHG5	extended	None	ENST00000435947,ENST00000453754	SNHG5andSNORD50BandSNORD50A.bAug10,SNHG5andSNORD50BandSNORD50A.cAug10,SNHG5andSNORD50BandSNORD50A.dAug10,SNHG5andSNORD50BandSNORD50A.pAug10	None	0.391253	3.52574	1.48034	19.1026	1.36812e-18	3.71498e-17
13:23945304:+,13:23949258:+	SACS	core	NM_014363	ENST00000382292,ENST00000382298	SACS.aAug10	uc001uon.2	1.71211	2.89829	2.25597	19.1022	1.36901e-18	3.71641e-17
2:44171033:+,2:44173252:+	LRPPRC	novel	NONE	NONE	NONE	NONE	-0.154295	8.31942	-2.3674	19.0998	1.37396e-18	3.72698e-17
5:72873830:+,5:72874576:+	UTP15	core	NM_032175	ENST00000296792,ENST00000508491,ENST00000509005,ENST00000543251	UTP15.aAug10,UTP15.bAug10,UTP15.cAug10,UTP15.dAug10	uc003kcw.1,uc010ize.1,uc011cso.1,uc011csp.1	2.33587	2.14728	2.39336	19.099	1.37541e-18	3.72802e-17
10:63845659:+,10:63850621:+	ARID5B	core	NM_001244638,NM_032199	ENST00000279873,ENST00000309334	ARID5B.aAug10,ARID5B.dAug10	uc001jlt.1	1.64083	2.24245	2.76983	19.0988	1.37598e-18	3.72862e-17
1:120510244:+,1:120512134:+	NOTCH2	novel	NONE	NONE	NONE	NONE	1.25141	8.50596	-2.27557	19.0977	1.37827e-18	3.73384e-17
1:151227284:+,1:151238784:+	PSMD4	novel	NONE	NONE	NONE	NONE	-0.345978	9.1149	-1.9712	19.0927	1.38848e-18	3.75862e-17
19:16758072:+,19:16770896:+	C19orf42	novel	NONE	NONE	NONE	NONE	0.269213	8.2699	-2.3923	19.0818	1.41121e-18	3.8121e-17
7:139313785:+,7:139315911:+	HIPK2	core	NM_001113239,NM_022740	ENST00000342645,ENST00000406875,ENST00000428878	HIPK2.aAug10,HIPK2.bAug10	uc003vvd.3,uc003vvf.3	2.56602	2.55771	2.36594	19.0801	1.41473e-18	3.81886e-17
5:135398376:+,5:135398875:+	TGFBI	core	NM_000358	ENST00000398813,ENST00000442011,ENST00000504205,ENST00000504411,ENST00000506699,ENST00000507018,ENST00000508076	TGFBI.aAug10,TGFBI.bAug10,TGFBI.cAug10,TGFBI.eAug10,TGFBI.oAug10	uc003lbf.3,uc003lbg.3,uc003lbh.3,uc011cyb.1	2.29582	2.18386	2.54242	19.0796	1.41584e-18	3.82088e-17
16:15180115:+,16:15185172:+	RRN3	extended	None	ENST00000429751	RRN3.bAug10	uc010uzq.1	1.05139	3.92084	1.32352	19.0762	1.42297e-18	3.83558e-17
13:113834545:+,13:113838660:+	PCID2	novel	NONE	NONE	NONE	NONE	-1.10833	8.54825	-2.25243	19.0757	1.42407e-18	3.83719e-17
7:155493638:+,7:155499554:+	RBM33	core	NM_053043	ENST00000307403,ENST00000392761,ENST00000401878,ENST00000440108	RBM33.aAug10,RBM33.bAug10,RBM33.cAug10,RBM33.dAug10	uc010lqk.1,uc011kvv.1	1.92486	2.39392	2.11954	19.0738	1.42807e-18	3.84598e-17
10:18963064:+,10:18964097:+	ARL5B	core	NM_178815	ENST00000377275	ARL5B.aAug10	uc001iqd.1	2.42149	2.59557	2.32806	19.0611	1.45515e-18	3.91492e-17
19:36227887:+,19:36228537:+	MLL4	novel	NONE	NONE	NONE	NONE	0.579987	8.52931	-2.26378	19.0605	1.45646e-18	3.91744e-17
2:216274462:+,2:216279560:+	FN1	novel	NONE	NONE	NONE	NONE	1.9726	8.30793	-2.37421	19.0506	1.47826e-18	3.96997e-17
16:11855899:+,16:11857334:+	ZC3H7A	novel	NONE	NONE	NONE	NONE	-1.02086	8.45727	-2.29862	19.041	1.49951e-18	4.02262e-17
10:22616579:+,10:22616879:+	BMI1	novel	NONE	NONE	NONE	NONE	0.973981	8.68048	-2.18559	19.0396	1.50262e-18	4.02923e-17
15:102501844:+,15:102513104:+	WASH3P	novel	NONE	NONE	NONE	NONE	-0.761378	8.36102	-2.34744	19.0379	1.50647e-18	4.03853e-17
5:180665239:+,5:180666487:+	GNB2L1	extended	None	ENST00000502905	GNB2L1andSNORD95andSNORD96A.bAug10,GNB2L1andSNORD95andSNORD96A.fAug10	None	0.658358	2.82509	1.82232	19.0365	1.50958e-18	4.0448e-17
10:13375971:+,10:13380705:+	SEPHS1	novel	NONE	NONE	NONE	NONE	0.462381	8.25252	-2.40099	19.0351	1.51278e-18	4.05029e-17
19:39957209:+,19:39959396:+	SUPT5H	novel	NONE	NONE	NONE	NONE	-0.393767	8.48155	-2.28805	19.0296	1.52525e-18	4.08159e-17
10:90762951:+,10:90768646:+	FAS	novel	NONE	NONE	NONE	NONE	2.25982	8.28569	-2.38533	19.0216	1.54339e-18	4.12817e-17
19:9408666:+,19:9413054:+	ZNF699	core	NM_198535	ENST00000308650	ZNF699.aAug10,ZNF699.cAug10	uc002mlc.1	2.75309	2.52011	2.13162	19.0216	1.54344e-18	4.12817e-17
7:72397501:+,7:72400478:+	POM121	novel	NONE	NONE	NONE	NONE	0.183166	8.65425	-2.20195	19.0172	1.55366e-18	4.14918e-17
17:27857637:+,17:27861136:+	TAOK1	core	NM_020791,NM_025142	ENST00000261716,ENST00000536202	TAOK1.aAug10,TAOK1.bAug10,TAOK1.cAug10	uc002hdz.1,uc010wbe.1,uc010wbf.1	2.33114	2.61841	2.22219	19.0129	1.56368e-18	4.17488e-17
14:102498804:+,14:102499606:+	DYNC1H1	novel	NONE	NONE	NONE	NONE	0.0486962	8.47624	-2.29083	19.0097	1.57097e-18	4.19315e-17
1:171535982:+,1:171544066:+	PRRC2C	extended	None	ENST00000426496,ENST00000495585	BAT2L2.bAug10	uc010pmh.1	0.349686	8.42222	-2.31765	19.0088	1.57326e-18	4.19726e-17
11:47774654:+,11:47776080:+	FNBP4	core	NM_015308	ENST00000263773,ENST00000533707,ENST00000534003,ENST00000542975	FNBP4.aAug10,FNBP4.bAug10,FNBP4.fAug10,FNBP4.iAug10	uc001ngj.2,uc009ylv.2	2.14053	2.11728	2.7105	19.0026	1.58778e-18	4.23493e-17
2:192229002:+,2:192234953:+	MYO1B	novel	NONE	NONE	NONE	NONE	0.587769	8.601	-2.22845	18.9931	1.61043e-18	4.2899e-17
5:72185784:+,5:72189204:+	TNPO1	novel	NONE	NONE	NONE	NONE	0.527244	8.59657	-2.23087	18.9911	1.61542e-18	4.3021e-17
1:150297545:+,1:150298209:+	PRPF3	core	NM_004698	ENST00000324862,ENST00000414970,ENST00000496202,ENST00000543398	PRPF3.aAug10,PRPF3.bAug10,PRPF3.cAug10,PRPF3.dAug10,PRPF3.eAug10,PRPF3.fAug10,PRPF3.gAug10,PRPF3.hAug10	uc001eum.3,uc009wlo.2,uc009wlp.2,uc010pca.1,uc010pcb.1	2.44204	2.43002	2.51908	18.9852	1.62954e-18	4.33861e-17
8:8235588:+,8:8238928:+	SGK223	core	NM_001080826	ENST00000330777,ENST00000520004	SGK223.aAug10	uc003wsh.3	2.18495	2.66139	2.21225	18.9832	1.63441e-18	4.34939e-17
1:226179064:+,1:226180099:+	C1orf55	core	NM_152608	ENST00000272091,ENST00000366817,ENST00000366818	C1orf55.aAug10,C1orf55.bAug10	uc001hpu.3,uc001hpv.2	2.4739	2.36426	2.28946	18.9815	1.63857e-18	4.35715e-17
2:187503047:+,2:187503136:+	ITGAV	core	NM_001144999,NM_001145000,NM_002210	ENST00000261023,ENST00000374907,ENST00000433736,ENST00000544640	ITGAV.aAug10,ITGAV.bAug10	uc002upq.2,uc010frs.2,uc010zfv.1	2.28123	2.18756	3.13069	18.9773	1.64886e-18	4.38118e-17
12:116450706:+,12:116452914:+	MED13L	core	NM_015335	ENST00000281928	MED13L.aAug10	uc001tvw.2	1.76045	2.62298	1.89134	18.9633	1.68387e-18	4.47082e-17
14:102473445:+,14:102476180:+	DYNC1H1	novel	NONE	NONE	NONE	NONE	0.0486962	8.57377	-2.24226	18.9598	1.69257e-18	4.49166e-17
12:69210725:+,12:69233054:+	MDM2	novel	NONE	NONE	NONE	NONE	2.96722	8.74514	-2.15667	18.9513	1.71431e-18	4.5436e-17
14:23530831:+,14:23531625:+	ACIN1	novel	NONE	NONE	NONE	NONE	0.933987	9.54311	-0.82077	18.9513	1.71431e-18	4.5436e-17
5:41907944:+,5:41909848:+	C5orf51	core	NM_175921	ENST00000381647,ENST00000509976	C5orf51.aAug10,C5orf51.cAug10	uc003jmo.2	2.20433	2.27006	2.2915	18.9389	1.74628e-18	4.62368e-17
18:33689219:+,18:33691022:+	SLC39A6	novel	NONE	NONE	NONE	NONE	1.60101	8.21125	-2.42185	18.935	1.7565e-18	4.64375e-17
2:10584393:+,2:10585057:+	ODC1	novel	NONE	NONE	NONE	NONE	-0.229375	8.2901	-2.3825	18.9348	1.75703e-18	4.64397e-17
8:117870697:+,8:117878825:+	RAD21	novel	NONE	NONE	NONE	NONE	-0.198734	8.59666	-2.22738	18.9279	1.77545e-18	4.68795e-17
17:27818883:+,17:27822578:+	TAOK1	core	NM_020791,NM_025142	ENST00000261716,ENST00000536202	TAOK1.aAug10,TAOK1.bAug10,TAOK1.cAug10,TAOK1.dAug10	uc002hdz.1,uc002heb.1,uc010wbe.1,uc010wbf.1	2.33114	2.51916	2.07291	18.9196	1.79748e-18	4.74254e-17
11:18637645:+,11:18638422:+	SPTY2D1	core	NM_194285	ENST00000333429,ENST00000336349,ENST00000536336,ENST00000543776	SPTY2D1.aAug10,SPTY2D1.bAug10,SPTY2D1.cAug10	uc001moy.2,uc010rdi.1	2.26283	2.31053	2.293	18.9173	1.80365e-18	4.75405e-17
17:62594608:+,17:62657947:+	SMURF2	extended	None	None	None	uc002jer.1	1.18703	4.15605	1.11871	18.9151	1.80982e-18	4.76672e-17
5:179045324:+,5:179047893:+	HNRNPH1	extended	None	ENST00000504779,ENST00000506721,ENST00000508103,ENST00000510431,ENST00000510678,ENST00000514731,ENST00000518548,ENST00000519958	HNRNPH1.iAug10,HNRNPH1.nAug10,HNRNPH1.oAug10,HNRNPH1.pAug10,HNRNPH1.rAug10,HNRNPH1.vfAug10,HNRNPH1.voAug10	None	0.509487	2.24792	2.47633	18.9113	1.81997e-18	4.79107e-17
3:73108281:+,3:73110174:+	PPP4R2	core	NM_174907	ENST00000295862,ENST00000356692,ENST00000394284,ENST00000470976,ENST00000482242,ENST00000488810	GXYLT2andPPP4R2andEBLN2.bAug10,GXYLT2andPPP4R2andEBLN2.cAug10,GXYLT2andPPP4R2andEBLN2.gAug10,GXYLT2andPPP4R2andEBLN2.hAug10,GXYLT2andPPP4R2andEBLN2.iAug10,GXYLT2andPPP4R2andEBLN2.jAug10	uc003dph.1,uc003dpi.1	0.771971	2.06548	2.61708	18.9015	1.84693e-18	4.85839e-17
11:27400315:+,11:27402187:+	LGR4	novel	NONE	NONE	NONE	NONE	0.752894	8.39551	-2.32928	18.8959	1.86254e-18	4.8958e-17
2:162061304:+,2:162081142:+	TANK	novel	NONE	NONE	NONE	NONE	1.1166	8.21067	-2.422	18.8893	1.88117e-18	4.94104e-17
1:120497855:+,1:120506197:+	NOTCH2	novel	NONE	NONE	NONE	NONE	1.25141	8.23921	-2.40859	18.886	1.89042e-18	4.96162e-17
1:173833842:+,1:173834648:+	GAS5	extended	None	ENST00000449289	GAS5_.wmAug10	None	0.884677	3.577	1.51486	18.8839	1.89642e-18	4.97614e-17
13:111082783:+,13:111084672:+	COL4A2	novel	NONE	NONE	NONE	NONE	1.48129	8.23916	-2.40813	18.8797	1.90845e-18	5.00463e-17
7:35922186:+,7:35925438:+	2017-09-07	novel	NONE	NONE	NONE	NONE	0.445381	8.42088	-2.31557	18.8794	1.90918e-18	5.00463e-17
1:183857711:+,1:183861211:+	RGL1	core	NM_015149	ENST00000304685,ENST00000360851,ENST00000367531,ENST00000536277,ENST00000539189,ENST00000543395	RGL1.aAug10,RGL1.bAug10,RGL1.cAug10,RGL1.dAug10,RGL1.eAug10,RGL1.gAug10,RGL1.iAug10	uc001gqm.2,uc001gqo.2,uc010pof.1,uc010pog.1,uc010poh.1,uc010poi.1	2.33894	3.02842	1.65868	18.875	1.92182e-18	5.03148e-17
11:102076805:+,11:102100433:+	YAP1	novel	NONE	NONE	NONE	NONE	0.47321	8.32188	-2.36771	18.8734	1.92645e-18	5.04237e-17
3:42663008:+,3:42672663:+	NKTR	novel	NONE	NONE	NONE	NONE	1.29576	8.44056	-2.30861	18.8673	1.94429e-18	5.08652e-17
3:195711147:+,3:195712498:+	SDHAP1	extended	None	ENST00000413474,ENST00000435731,ENST00000545003	SDHAP1.eAug10,SDHAP1.nAug10,SDHAP1.qAug10,SDHAP1.sAug10,SDHAP1.vbAug10,SDHAP1.veAug10	uc011btq.1	2.49626	3.40635	1.45668	18.863	1.95671e-18	5.11647e-17
2:139322420:+,2:139326506:+	SPOPL	novel	NONE	NONE	NONE	NONE	1.3615	8.34315	-2.35502	18.8628	1.95749e-18	5.11725e-17
1:243291602:+,1:243299445:+	CEP170	novel	NONE	NONE	NONE	NONE	1.43827	8.23332	-2.41008	18.8598	1.96619e-18	5.13616e-17
19:49994121:+,19:49994682:+	RPL13A,RPL13AP5	novel	NONE	NONE	NONE	NONE	0.905372	8.51759	-2.26972	18.8582	1.97102e-18	5.14622e-17
8:103231175:+,8:103236274:+	RRM2B	core	NM_001172477,NM_001172478,NM_015713	ENST00000251810,ENST00000395912,ENST00000522368,ENST00000535248	RRM2B.aAug10,RRM2B.bAug10,RRM2B.cAug10,RRM2B.dAug10,RRM2B.eAug10,RRM2B.fAug10	uc003ykn.2,uc003yko.2,uc010mbv.1	2.42751	2.30093	2.88481	18.856	1.97752e-18	5.15935e-17
20:13769298:+,20:13779107:+	C20orf7	novel	NONE	NONE	NONE	NONE	1.39697	8.22179	-2.41621	18.8558	1.97809e-18	5.15957e-17
10:71973345:+,10:71977568:+	PPA1	novel	NONE	NONE	NONE	NONE	0.647762	8.53168	-2.26285	18.855	1.98039e-18	5.16301e-17
11:13424825:+,11:13427206:+	BTBD10	core	NM_032320	ENST00000278174,ENST00000527102,ENST00000528120,ENST00000530907	BTBD10.aAug10,BTBD10.bAug10,BTBD10.cAug10,BTBD10.dAug10,BTBD10.eAug10,BTBD10.hAug10,BTBD10.iAug10	uc001mkz.2,uc001mla.2,uc009ygn.2,uc010rcl.1,uc010rcm.1	1.1058	2.07739	2.56061	18.8542	1.98299e-18	5.16851e-17
6:75975054:+,6:75994118:+	TMEM30A	core	NM_001143958	ENST00000475111	TMEM30A.bAug10	uc003phx.2	2.0816	5.08476	0.924897	18.8536	1.98477e-18	5.17187e-17
9:123945676:+,9:123963917:+	RAB14	novel	NONE	NONE	NONE	NONE	-0.674236	8.3215	-2.36796	18.8452	2.0098e-18	5.23319e-17
2:29159819:+,2:29164327:+	WDR43	novel	NONE	NONE	NONE	NONE	0.671818	8.39495	-2.33044	18.8426	2.01779e-18	5.25138e-17
22:41522044:+,22:41523491:+	EP300	core	NM_001429	ENST00000263253	EP300.aAug10	uc003azl.3	2.20621	2.80595	1.8021	18.8372	2.03429e-18	5.28911e-17
5:176397867:+,5:176402397:+	UIMC1	core	NM_001199297,NM_001199298,NM_016290	ENST00000323774,ENST00000377219,ENST00000377220,ENST00000377227,ENST00000417486,ENST00000506128,ENST00000507513,ENST00000509236,ENST00000510698,ENST00000511320,ENST00000512031,ENST00000515488	UIMC1.aAug10,UIMC1.bAug10,UIMC1.cAug10,UIMC1.dAug10,UIMC1.eAug10,UIMC1.fAug10,UIMC1.gAug10,UIMC1.hAug10,UIMC1.iAug10,UIMC1.nAug10,UIMC1.oAug10,UIMC1.pAug10,UIMC1.qAug10,UIMC1.rAug10,UIMC1.sAug10	uc003mfc.1,uc003mfd.1,uc003mfg.1,uc003mfh.1,uc010jkj.1,uc011dfp.1,uc011dfq.1	1.70053	2.0837	2.53844	18.8303	2.05534e-18	5.33987e-17
11:249057:+,11:252505:+	PSMD13	novel	NONE	NONE	NONE	NONE	-0.418138	8.28874	-2.38424	18.8296	2.0574e-18	5.34391e-17
11:65766214:+,11:65767038:+	EIF1AD	novel	NONE	NONE	NONE	NONE	-0.44912	8.6559	-2.19941	18.8256	2.0699e-18	5.37241e-17
15:64449108:+,15:64451466:+	PPIB,SNX22	novel	NONE	NONE	NONE	NONE	1.2888	8.28859	-2.3842	18.8252	2.07115e-18	5.37432e-17
X:150154663:+,X:150156250:+	HMGB3	novel	NONE	NONE	NONE	NONE	0.546741	8.38451	-2.33536	18.8205	2.08587e-18	5.40852e-17
16:3117614:+,16:3118181:+	IL32	core	NM_001012636	ENST00000382213,ENST00000548652,ENST00000551513	IL32.kAug10,IL32.vaAug10	uc002ctu.2	1.35596	3.0696	1.5291	18.8202	2.08679e-18	5.40956e-17
5:60826025:+,5:60827292:+	ZSWIM6	core	NM_020928	ENST00000252744	ZSWIM6.aAug10	uc003jsr.2	2.05337	2.36548	2.74686	18.8108	2.11644e-18	5.47697e-17
6:122734794:+,6:122740313:+	HSF2	novel	NONE	NONE	NONE	NONE	0.598272	8.40451	-2.32676	18.8026	2.14294e-18	5.54283e-17
4:83346036:+,4:83347616:+	HNRPDL	novel	NONE	NONE	NONE	NONE	0.94378	8.21525	-2.42054	18.8023	2.14377e-18	5.54361e-17
12:7083855:+,12:7084391:+	EMG1	novel	NONE	NONE	NONE	NONE	0.618872	8.26622	-2.39483	18.7987	2.1553e-18	5.57069e-17
19:9407609:+,19:9407972:+	ZNF699	core	NM_198535	ENST00000308650	ZNF699.aAug10	uc002mlc.1	2.75309	3.26528	1.76767	18.7979	2.1581e-18	5.57656e-17
2:27556651:+,2:27558465:+	GTF3C2	novel	NONE	NONE	NONE	NONE	-0.24168	8.24933	-2.40328	18.7916	2.17869e-18	5.62286e-17
2:109151050:+,2:109288781:+	LIMS1	novel	NONE	NONE	NONE	NONE	1.01208	8.34727	-2.35521	18.7903	2.18305e-18	5.63274e-17
12:116446937:+,12:116450602:+	MED13L	core	NM_015335	ENST00000281928	MED13L.aAug10	uc001tvw.2	1.76045	2.66943	1.9218	18.7883	2.18957e-18	5.64818e-17
2:55460553:+,2:55461967:+	RPS27A	novel	NONE	NONE	NONE	NONE	1.20375	2.67166	1.87201	18.7852	2.19968e-18	5.67007e-17
X:76931793:+,X:76944311:+	ATRX	novel	NONE	NONE	NONE	NONE	0.1992	8.21502	-2.42024	18.783	2.207e-18	5.68756e-17
7:121011477:+,7:121012164:+	FAM3C	core	NM_001040020,NM_014888	ENST00000359943,ENST00000412653,ENST00000426156,ENST00000455828	FAM3C.aAug10,FAM3C.bAug10,FAM3C.cAug10,FAM3C.dAug10,FAM3C.eAug10,FAM3C.fAug10,FAM3C.gAug10	uc003vjx.2,uc010lkm.2	1.13459	2.11134	2.92976	18.7805	2.21553e-18	5.70673e-17
6:117890899:+,6:117894630:+	DCBLD1,GOPC	novel	NONE	NONE	NONE	NONE	1.63834	8.55827	-2.24779	18.7783	2.22259e-18	5.72352e-17
2:189926341:+,2:189927736:+	COL5A2	novel	NONE	NONE	NONE	NONE	1.2239	9.2655	-0.0235456	18.7725	2.24234e-18	5.77015e-17
13:49765520:+,13:49771861:+	FNDC3A	novel	NONE	NONE	NONE	NONE	0.605671	8.44428	-2.30646	18.7698	2.25141e-18	5.78923e-17
12:93192862:+,12:93195376:+	EEA1	core	NM_003566	ENST00000322349	EEA1.aAug10,EEA1.bAug10	uc001tck.2	2.39664	2.69981	1.80459	18.7692	2.25344e-18	5.79304e-17
17:37649143:+,17:37650777:+	CDK12	core	NM_015083,NM_016507	ENST00000430627,ENST00000447079	CDK12.aAug10,CDK12.bAug10	uc002hrw.3,uc010cvv.2,uc010wef.1	1.98142	2.11766	2.38601	18.7551	2.30194e-18	5.91196e-17
3:156874872:+,3:156876655:+	CCNL1	extended	None	ENST00000295925,ENST00000465947,ENST00000475298,ENST00000476367,ENST00000477127,ENST00000478454,ENST00000479596	CCNL1.eAug10,CCNL1.gAug10,CCNL1.kAug10,CCNL1.pAug10,CCNL1.qAug10	uc003fbg.2,uc003fbi.1	1.62486	2.74936	2.40811	18.7485	2.32489e-18	5.96797e-17
2:216226349:+,2:216229602:+	FN1	novel	NONE	NONE	NONE	NONE	1.9726	7.29708	0.713911	18.7442	2.34015e-18	6.00422e-17
12:116421345:+,12:116421985:+	MED13L	core	NM_015335	ENST00000281928	MED13L.aAug10	uc001tvw.2	1.76045	2.29977	2.51555	18.7426	2.34556e-18	6.01662e-17
1:183849934:+,1:183852920:+	RGL1	core	NM_015149	ENST00000304685,ENST00000360851,ENST00000367531,ENST00000536277,ENST00000539189	RGL1.aAug10,RGL1.bAug10,RGL1.cAug10,RGL1.dAug10,RGL1.eAug10	uc001gqm.2,uc001gqo.2,uc010pog.1,uc010poh.1,uc010poi.1	2.33894	2.7803	2.08923	18.7421	2.34763e-18	6.02046e-17
8:54628584:+,8:54708207:+	ATP6V1H	extended	None	ENST00000523343	ATP6V1H.lAug10	None	0.738647	8.13749	-2.45867	18.7406	2.35298e-18	6.02979e-17
8:42249446:+,8:42251728:+	VDAC3	extended	None	ENST00000520115	VDAC3.cAug10	None	-0.208998	8.00733	-0.938544	18.7392	2.35776e-18	6.04056e-17
2:175094179:+,2:175113180:+	OLA1	core	NM_001011708	ENST00000344357	OLA1.aAug10,OLA1.fAug10,OLA1.gAug10,OLA1.lAug10	uc002uii.2,uc002uij.2	0.300337	3.67251	1.32391	18.7259	2.4057e-18	6.1499e-17
2:174940255:+,2:175087761:+	OLA1	novel	NONE	NONE	NONE	NONE	0.300337	8.20258	-2.42676	18.724	2.41246e-18	6.1657e-17
5:82808215:+,5:82841356:+	VCAN	core	NM_001126336	ENST00000502527	VCAN.eAug10	uc003kik.3	1.4917	3.48685	1.39684	18.7218	2.42076e-18	6.18539e-17
12:93174187:+,12:93175726:+	EEA1	core	NM_003566	ENST00000322349	EEA1.aAug10,EEA1.bAug10	uc001tck.2	2.39664	2.39504	2.08921	18.7204	2.42569e-18	6.19499e-17
2:216236738:+,2:216238045:+	FN1	core	NM_212474	ENST00000346544,ENST00000357009,ENST00000357867,ENST00000432072	FN1.gAug10,FN1.jAug10,FN1.tAug10	uc002vfh.2,uc002vfj.2,uc002vfk.1,uc010fvb.1,uc010fvc.1	1.9726	2.17265	2.42354	18.7175	2.43637e-18	6.22075e-17
19:9724779:+,19:9727721:+	ZNF561	core	NM_152289	ENST00000302851,ENST00000424629,ENST00000443819,ENST00000444611,ENST00000444802,ENST00000457965,ENST00000483768	ZNF562andZNF561.aAug10,ZNF562andZNF561.bAug10,ZNF562andZNF561.cAug10,ZNF562andZNF561.gAug10,ZNF562andZNF561.mAug10,ZNF562andZNF561.nAug10,ZNF562andZNF561.vaAug10,ZNF562andZNF561.vbAug10,ZNF562andZNF561.vhAug10	uc002mlu.2,uc010dwu.2	2.29012	2.22531	2.33979	18.7157	2.4429e-18	6.23591e-17
1:186303665:+,1:186304470:+	MIR548F1,TPR	novel	NONE	NONE	NONE	NONE	-0.676165	8.3782	-2.33699	18.7135	2.45103e-18	6.2513e-17
2:189922153:+,2:189923575:+	COL5A2	novel	NONE	NONE	NONE	NONE	1.2239	8.4134	-2.32132	18.7135	2.45118e-18	6.2513e-17
1:226180703:+,1:226182967:+	C1orf55	core	NM_152608	ENST00000272091,ENST00000366817,ENST00000366818	C1orf55.aAug10,C1orf55.bAug10	uc001hpu.3,uc001hpv.2	2.4739	2.44444	2.19861	18.7113	2.45928e-18	6.26861e-17
12:69207408:+,12:69229609:+	MDM2	extended	None	ENST00000299252,ENST00000356290,ENST00000358483,ENST00000523991,ENST00000543323	MDM2.eAug10,MDM2.pAug10	uc001sun.3,uc009zra.2	2.96722	7.48947	1.46884	18.7018	2.49472e-18	6.35586e-17
17:48271808:+,17:48272082:+	COL1A1	novel	NONE	NONE	NONE	NONE	1.20806	8.37241	-2.34285	18.6985	2.50727e-18	6.38474e-17
11:35236461:+,11:35250676:+	CD44	novel	NONE	NONE	NONE	NONE	0.98338	8.78944	-2.13497	18.6935	2.52656e-18	6.42609e-17
5:158603875:+,5:158621724:+	RNF145	novel	NONE	NONE	NONE	NONE	1.63576	8.29259	-2.38044	18.692	2.53208e-18	6.43701e-17
12:69203072:+,12:69222551:+	MDM2	novel	NONE	NONE	NONE	NONE	2.96722	9.91783	-0.633774	18.6853	2.55778e-18	6.4992e-17
11:13435197:+,11:13438705:+	BTBD10	core	NM_032320	ENST00000278174,ENST00000525108,ENST00000525661,ENST00000525864,ENST00000528120,ENST00000530907	BTBD10.aAug10,BTBD10.bAug10,BTBD10.cAug10,BTBD10.dAug10,BTBD10.eAug10,BTBD10.fAug10,BTBD10.gAug10,BTBD10.hAug10	uc001mkz.2,uc001mla.2,uc009ygo.2,uc010rcl.1,uc010rcm.1,uc010rcn.1	1.1058	2.02955	2.55728	18.6847	2.56017e-18	6.5037e-17
10:99126666:+,10:99129182:+	RRP12	novel	NONE	NONE	NONE	NONE	-0.203984	8.20792	-2.42357	18.6805	2.57668e-18	6.53617e-17
7:135099181:+,7:135106905:+	CNOT4	novel	NONE	NONE	NONE	NONE	1.91536	8.35653	-2.35075	18.6775	2.58831e-18	6.56409e-17
19:13885388:+,19:13888866:+	C19orf53	extended	None	None	MRI1andC19orf53.jAug10	None	0.716143	5.2851	1.22788	18.6758	2.5952e-18	6.57999e-17
22:24765288:+,22:24810502:+	SPECC1L	novel	NONE	NONE	NONE	NONE	-0.24406	8.17259	-2.44113	18.6744	2.60033e-18	6.5914e-17
3:9476169:+,3:9477412:+	SETD5	novel	NONE	NONE	NONE	NONE	0.663026	8.58945	-2.23083	18.6729	2.60626e-18	6.60325e-17
12:16035753:+,12:16042862:+	STRAP	extended	None	ENST00000538352,ENST00000541731	STRAP.cAug10	uc001rdd.3	0.570115	3.4294	1.60231	18.6723	2.6086e-18	6.60759e-17
14:102822234:+,14:102825756:+	CINP	core	NM_001177611,NM_001177612,NM_032630	ENST00000216756,ENST00000536961,ENST00000541568,ENST00000558523,ENST00000558764,ENST00000559504,ENST00000559514,ENST00000561468	CINP.aAug10,CINP.bAug10,CINP.cAug10,CINP.dAug10,CINP.eAug10,CINP.fAug10,CINP.gAug10	uc001ylu.1,uc001ylv.1	2.29731	2.22447	2.23979	18.6656	2.63545e-18	6.674e-17
6:86328657:+,6:86332200:+	SYNCRIP	novel	NONE	NONE	NONE	NONE	1.09327	9.5131	0.100024	18.6629	2.64608e-18	6.69608e-17
2:189929381:+,2:189931455:+	COL5A2	novel	NONE	NONE	NONE	NONE	1.2239	8.24754	-2.40387	18.6623	2.6488e-18	6.69973e-17
2:238257027:+,2:238257255:+	COL6A3	novel	NONE	NONE	NONE	NONE	2.01483	2.08871	2.50566	18.6611	2.65329e-18	6.70948e-17
16:71929492:+,16:71956377:+	KIAA0174	novel	NONE	NONE	NONE	NONE	-0.872595	8.13631	-2.4598	18.6591	2.66154e-18	6.72874e-17
11:9452550:+,11:9455268:+	IPO7	novel	NONE	NONE	NONE	NONE	-0.488319	8.21923	-2.41703	18.6562	2.67301e-18	6.75125e-17
20:21362695:+,20:21369911:+	XRN2	novel	NONE	NONE	NONE	NONE	-0.81848	8.24174	-2.40783	18.6544	2.68062e-18	6.76559e-17
5:72874677:+,5:72874842:+	UTP15	core	NM_032175	ENST00000296792,ENST00000508491,ENST00000509005,ENST00000543251	UTP15.aAug10,UTP15.bAug10,UTP15.cAug10,UTP15.dAug10,UTP15.eAug10	uc003kcw.1,uc010ize.1,uc011cso.1,uc011csp.1	2.33587	2.05435	2.6175	18.6536	2.68381e-18	6.77202e-17
2:187531957:+,2:187532398:+	ITGAV	core	NM_001144999,NM_001145000,NM_002210	ENST00000261023,ENST00000374907,ENST00000433736,ENST00000460641	ITGAV.aAug10,ITGAV.bAug10,ITGAV.dAug10	uc002upq.2,uc010frs.2,uc010zfv.1	2.28123	2.1254	3.73136	18.653	2.68631e-18	6.7767e-17
2:88895181:+,2:88913242:+	EIF2AK3	core	NM_004836	ENST00000303236,ENST00000419748,ENST00000535951	EIF2AK3.aAug10,EIF2AK3.cAug10,EIF2AK3.jAug10,EIF2AK3.kAug10	uc002stc.3	2.82567	3.12056	1.58873	18.6498	2.69923e-18	6.80766e-17
16:3117614:+,16:3118991:+	IL32	novel	NONE	NONE	NONE	NONE	1.35596	8.11166	-2.47158	18.6464	2.71335e-18	6.83834e-17
11:35685328:+,11:35747472:+	TRIM44	novel	NONE	NONE	NONE	NONE	1.12855	8.13618	-2.45901	18.6449	2.71939e-18	6.85193e-17
11:63398943:+,11:63403679:+	ATL3	novel	NONE	NONE	NONE	NONE	0.367714	8.32953	-2.36426	18.644	2.72328e-18	6.85845e-17
7:56128109:+,7:56130376:+	CCT6A	novel	NONE	NONE	NONE	NONE	-0.66134	8.30284	-2.37641	18.6432	2.72623e-18	6.8626e-17
4:170042140:+,4:170043251:+	SH3RF1	core	NM_020870	ENST00000284637,ENST00000508685,ENST00000511421	SH3RF1.aAug10,SH3RF1.bAug10	uc003isa.1,uc010irc.1	3.15288	2.81312	2.11803	18.6391	2.74332e-18	6.90232e-17
4:170077830:+,4:170189971:+	SH3RF1	core	NM_020870	ENST00000284637,ENST00000508685	SH3RF1.aAug10	uc003isa.1	3.15288	3.11942	1.84445	18.6342	2.76388e-18	6.94739e-17
1:222843331:+,1:222846655:+	AIDA	extended	None	ENST00000495670	None	None	0.617676	9.21599	-1.14616	18.6286	2.78734e-18	6.99802e-17
1:100542833:+,1:100544007:+	HIAT1	core	NM_033055	ENST00000370152	HIAT1.aAug10,HIAT1.bAug10,HIAT1.cAug10	uc001dst.2	1.6535	2.04641	2.57333	18.6276	2.79169e-18	7.00558e-17
5:96503695:+,5:96506910:+	RIOK2	novel	NONE	NONE	NONE	NONE	1.9345	8.11748	-2.46917	18.6239	2.8075e-18	7.04023e-17
17:38801871:+,17:38804025:+	SMARCE1	novel	NONE	NONE	NONE	NONE	-0.0278045	8.24712	-2.40511	18.6229	2.8115e-18	7.04777e-17
X:102631541:+,X:102632438:+	NGFRAP1	extended	None	None	NGFRAP1.kAug10	None	0.144419	3.50641	1.27281	18.6167	2.83841e-18	7.10715e-17
7:43623048:+,7:43635500:+	STK17A	core	NM_004760	ENST00000319357	STK17A.aAug10,STK17A.dAug10	uc003tih.2	2.24179	2.44647	2.09908	18.61	2.86733e-18	7.16975e-17
10:1045035:+,10:1046888:+	GTPBP4	novel	NONE	NONE	NONE	NONE	1.64336	8.3763	-2.34024	18.5982	2.91913e-18	7.28715e-17
10:99190410:+,10:99192112:+	PGAM1	extended	None	None	PGAM1.dAug10	uc009xvo.2	0.814621	7.02657	0.429711	18.5979	2.92047e-18	7.28876e-17
8:105521302:+,8:105601047:+	LRP12	core	NM_001135703	ENST00000424843,ENST00000519675,ENST00000520770	LRP12.aAug10,LRP12.dAug10	uc003ymb.2,uc003ymc.3	1.79425	3.22222	1.6165	18.5973	2.92335e-18	7.29423e-17
1:38272648:+,1:38272773:+	YRDC	core	NM_024640	ENST00000373044	YRDC.aAug10,YRDC.bAug10	uc001cca.1	2.17024	2.38353	2.5652	18.5965	2.92664e-18	7.30072e-17
12:133331719:+,12:133338204:+	ANKLE2	core	NM_015114	ENST00000337516,ENST00000357997	ANKLE2.aAug10,ANKLE2.eAug10	uc001ukx.2	1.37562	2.41606	2.02139	18.5933	2.94093e-18	7.33115e-17
12:48249584:+,12:48251287:+	VDR	novel	NONE	NONE	NONE	NONE	-0.746766	8.88645	-2.08513	18.591	2.95143e-18	7.35558e-17
15:48714265:+,15:48717936:+	FBN1	novel	NONE	NONE	NONE	NONE	0.836352	8.13534	-2.46055	18.5888	2.96106e-18	7.37782e-17
1:78381818:+,1:78383810:+	NEXN	novel	NONE	NONE	NONE	NONE	0.401713	9.15393	-1.0146	18.583	2.98744e-18	7.44004e-17
12:69210725:+,12:69218143:+	MDM2	novel	NONE	NONE	NONE	NONE	2.96722	8.2008	-2.42671	18.5817	2.99322e-18	7.45091e-17
5:72872861:+,5:72873681:+	UTP15	core	NM_032175	ENST00000296792,ENST00000508491,ENST00000509005,ENST00000512550,ENST00000543251	UTP15.aAug10,UTP15.bAug10,UTP15.cAug10,UTP15.dAug10,UTP15.fAug10	uc003kcw.1,uc010ize.1,uc011cso.1,uc011csp.1	2.33587	2.37119	2.39345	18.5803	2.99962e-18	7.46329e-17
20:61526266:+,20:61527585:+	DIDO1	novel	NONE	NONE	NONE	NONE	1.07688	8.52784	-2.2634	18.574	3.0286e-18	7.52827e-17
6:118015343:+,6:118028088:+	NUS1	novel	NONE	NONE	NONE	NONE	1.10441	8.51347	-2.27263	18.5663	3.06439e-18	7.61006e-17
12:116440907:+,12:116443674:+	MED13L	core	NM_015335	ENST00000281928	MED13L.aAug10	uc001tvw.2	1.76045	2.55622	1.9376	18.5612	3.08831e-18	7.66223e-17
1:225600347:+,1:225605686:+	LBR	novel	NONE	NONE	NONE	NONE	-0.840355	8.85669	-2.09833	18.5512	3.13573e-18	7.7762e-17
1:207940540:+,1:207956637:+	CD46	core	NM_172361	ENST00000360212	CD46.gAug10	uc001hgf.2,uc001hgh.2	1.5846	6.51169	0.730669	18.5478	3.152e-18	7.81472e-17
20:33345907:+,20:33356267:+	NCOA6	extended	None	ENST00000397675	NCOA6.dAug10	uc010gew.1	1.2656	8.20586	-2.4258	18.5455	3.16262e-18	7.8392e-17
22:28307097:+,22:28315160:+	PITPNB	novel	NONE	NONE	NONE	NONE	0.419828	8.18255	-2.43655	18.544	3.17011e-18	7.85592e-17
13:76410593:+,13:76414527:+	LMO7	novel	NONE	NONE	NONE	NONE	-1.24795	8.24021	-2.40754	18.5421	3.17928e-18	7.87677e-17
5:65449424:+,5:65455047:+	SREK1	core	NM_001077199	ENST00000334121,ENST00000537482	SFRS12.aAug10	uc003jun.2	0.950507	2.3255	2.16298	18.5411	3.18417e-18	7.88518e-17
7:36464351:+,7:36465624:+	ANLN	novel	NONE	NONE	NONE	NONE	-1.10154	8.16477	-2.44442	18.5369	3.20436e-18	7.92959e-17
7:73106976:+,7:73107954:+	WBSCR22	novel	NONE	NONE	NONE	NONE	0.978057	8.14672	-2.45365	18.5326	3.22581e-18	7.97608e-17
2:9570149:+,2:9572640:+	CPSF3	novel	NONE	NONE	NONE	NONE	0.2467	8.47004	-2.2943	18.5302	3.23747e-18	7.99647e-17
19:36124154:+,19:36125158:+	RBM42	novel	NONE	NONE	NONE	NONE	-0.148063	8.26283	-2.39507	18.5274	3.25124e-18	8.02672e-17
12:108925057:+,12:108929135:+	SART3	novel	NONE	NONE	NONE	NONE	-0.411009	8.53228	-2.25932	18.524	3.26814e-18	8.06276e-17
18:48575230:+,18:48586236:+	SMAD4	novel	NONE	NONE	NONE	NONE	0.998169	8.24547	-2.40607	18.5216	3.28033e-18	8.08905e-17
X:20150381:+,X:20153856:+	EIF1AX	novel	NONE	NONE	NONE	NONE	0.565499	9.60058	-0.670504	18.5127	3.32484e-18	8.1892e-17
8:104066210:+,8:104075183:+	ATP6V1C1	novel	NONE	NONE	NONE	NONE	1.46528	8.42552	-2.31638	18.5087	3.3452e-18	8.23358e-17
6:36438034:+,6:36452491:+	KCTD20	novel	NONE	NONE	NONE	NONE	-0.705608	8.06563	-2.49501	18.5031	3.37403e-18	8.3026e-17
6:31701449:+,6:31701931:+	CLIC1	novel	NONE	NONE	NONE	NONE	0.913193	8.26769	-2.3952	18.5002	3.38909e-18	8.3377e-17
10:90750663:+,10:90762786:+	ACTA2,FAS	core	NM_000043,NM_152871,NM_152872,NR_028033,NR_028034,NR_028035,NR_028036	ENST00000352159,ENST00000355279,ENST00000355740,ENST00000357339,ENST00000371875,ENST00000479522,ENST00000484444,ENST00000488877,ENST00000492756,ENST00000494410	STAMBPL1andFAS.eAug10,STAMBPL1andFAS.gAug10,STAMBPL1andFAS.kAug10,STAMBPL1andFAS.mAug10,STAMBPL1andFAS.nAug10,STAMBPL1andFAS.qAug10,STAMBPL1andFAS.rAug10,STAMBPL1andFAS.sAug10,STAMBPL1andFAS.tAug10,STAMBPL1andFAS.vbAug10,STAMBPL1andFAS.vdAug10	uc001kfr.2,uc001kfs.2,uc001kft.2,uc001kfw.2,uc010qnb.1,uc010qnc.1,uc010qnd.1,uc010qne.1	1.13315	2.62785	1.80756	18.4985	3.39777e-18	8.35711e-17
1:174975977:+,1:174977745:+	CACYBP	novel	NONE	NONE	NONE	NONE	0.201105	8.25684	-2.39896	18.4967	3.40697e-18	8.3719e-17
5:34814774:+,5:34821837:+	RAI14	novel	NONE	NONE	NONE	NONE	-1.27403	8.17587	-2.44076	18.4944	3.41893e-18	8.39933e-17
7:32598240:+,7:32598541:+	AVL9	core	NM_015060	ENST00000318709,ENST00000329714,ENST00000404479,ENST00000409301,ENST00000446718	AVL9.aAug10,AVL9.bAug10,AVL9.cAug10	uc003tcv.1,uc010kwj.1,uc011kai.1	1.58185	2.0599	2.57614	18.4898	3.44321e-18	8.45503e-17
2:187511604:+,2:187514567:+	ITGAV	core	NM_001144999,NM_001145000,NM_002210	ENST00000261023,ENST00000374907,ENST00000433736,ENST00000544640	ITGAV.aAug10,ITGAV.bAug10	uc002upq.2,uc010frs.2,uc010zfv.1	2.28123	2.20673	3.14315	18.4893	3.44565e-18	8.45904e-17
6:86346861:+,6:86349939:+	SYNCRIP	novel	NONE	NONE	NONE	NONE	1.09327	7.161	0.57709	18.4862	3.46249e-18	8.49406e-17
2:54021586:+,2:54024652:+	ERLEC1,LOC100302652	novel	NONE	NONE	NONE	NONE	0.00360101	8.09693	-2.4791	18.4838	3.47505e-18	8.52127e-17
5:41909994:+,5:41911150:+	C5orf51	core	NM_175921	ENST00000381647,ENST00000505931,ENST00000509976	C5orf51.aAug10,C5orf51.bAug10,C5orf51.cAug10	uc003jmo.2	2.20433	2.3507	2.11771	18.4819	3.48514e-18	8.54404e-17
14:71051660:+,14:71057983:+	MED6	novel	NONE	NONE	NONE	NONE	0.280671	9.67898	-0.535205	18.4742	3.5264e-18	8.63511e-17
14:57700750:+,14:57704056:+	EXOC5	novel	NONE	NONE	NONE	NONE	0.057132	8.18141	-2.43764	18.4681	3.55912e-18	8.70619e-17
19:2269743:+,19:2271781:+	OAZ1	extended	None	None	OAZ1andSPPL2B.rAug10,OAZ1andSPPL2B.vcAug10	None	0.649211	3.29217	1.359	18.4681	3.55956e-18	8.70619e-17
11:102933143:+,11:102936998:+	DCUN1D5	extended	None	ENST00000527260	None	None	0.605811	8.1816	-2.43694	18.4675	3.56254e-18	8.71145e-17
X:135956611:+,X:135957417:+	RBMX	novel	NONE	NONE	NONE	NONE	-0.0481925	8.1213	-2.46783	18.4609	3.59896e-18	8.7903e-17
9:75780125:+,9:75782413:+	ANXA1	novel	NONE	NONE	NONE	NONE	0.548849	10.0796	-0.431971	18.4586	3.61125e-18	8.81622e-17
1:183874105:+,1:183876146:+	RGL1	core	NM_015149	ENST00000304685,ENST00000360851,ENST00000367531,ENST00000536277,ENST00000539189,ENST00000543395	RGL1.aAug10,RGL1.bAug10,RGL1.cAug10,RGL1.dAug10,RGL1.eAug10,RGL1.fAug10,RGL1.gAug10,RGL1.lAug10	uc001gqm.2,uc001gqo.2,uc010pof.1,uc010pog.1,uc010poh.1,uc010poi.1	2.33894	2.48762	2.08086	18.4575	3.61761e-18	8.82808e-17
1:100524284:+,1:100525434:+	HIAT1	core	NM_033055	ENST00000370152,ENST00000421661	HIAT1.aAug10,HIAT1.dAug10	uc001dst.2	1.6535	2.22911	2.52726	18.4574	3.61778e-18	8.82808e-17
12:116422177:+,12:116424071:+	MED13L	core	NM_015335	ENST00000281928	MED13L.aAug10	uc001tvw.2	1.76045	2.28351	2.22256	18.4537	3.6385e-18	8.87657e-17
20:54945396:+,20:54948464:+	AURKA	novel	NONE	NONE	NONE	NONE	-0.739767	8.35407	-2.34877	18.4507	3.65552e-18	8.9119e-17
7:121012193:+,7:121036216:+	FAM3C	novel	NONE	NONE	NONE	NONE	1.13459	8.10878	-2.47346	18.4495	3.66212e-18	8.92592e-17
4:187518946:+,4:187521052:+	FAT1	novel	NONE	NONE	NONE	NONE	1.07457	8.43028	-2.31432	18.4471	3.67569e-18	8.9543e-17
6:130442103:+,6:130454988:+	L3MBTL3	novel	NONE	NONE	NONE	NONE	1.46519	8.20447	-2.42668	18.4416	3.70682e-18	9.02025e-17
10:17746517:+,10:17747587:+	STAM	novel	NONE	NONE	NONE	NONE	0.337734	8.26727	-2.39263	18.4373	3.73097e-18	9.0727e-17
10:32327146:+,10:32328255:+	KIF5B	novel	NONE	NONE	NONE	NONE	-0.478078	8.1209	-2.46706	18.4363	3.73649e-18	9.08195e-17
1:101343459:+,1:101360189:+	EXTL2	extended	None	None	EXTL2.iAug10	None	-0.029967	8.15144	-2.45089	18.4339	3.75042e-18	9.1137e-17
9:101904985:+,9:101907014:+	TGFBR1	core	NM_001130916,NM_004612	ENST00000374990,ENST00000374994,ENST00000540092,ENST00000546096,ENST00000549766,ENST00000550253,ENST00000552516	TGFBR1.aAug10,TGFBR1.bAug10,TGFBR1.cAug10,TGFBR1.iAug10	uc004azc.2,uc004azd.2,uc011lvc.1	2.17317	2.02005	2.942	18.4321	3.76089e-18	9.13702e-17
3:112727277:+,3:112729892:+	C3orf17	extended	None	ENST00000461381	C3orf17.kAug10	uc011bid.1	-0.0205686	8.45135	-1.77418	18.4307	3.76883e-18	9.14999e-17
16:84779279:+,16:84797692:+	USP10	novel	NONE	NONE	NONE	NONE	-0.106462	8.03237	-2.51124	18.4294	3.7763e-18	9.16599e-17
7:92207707:+,7:92208631:+	FAM133B,LOC728066	core	NM_001040057,NM_152789,NR_034169	ENST00000415397,ENST00000427372,ENST00000438306,ENST00000445716,ENST00000481407,ENST00000492686	FAM133B.aAug10,FAM133B.bAug10,FAM133B.cAug10,FAM133B.dAug10,FAM133B.eAug10,FAM133B.fAug10,FAM133B.gAug10,FAM133B.hAug10,FAM133B.iAug10,FAM133B.jAug10,FAM133B.lAug10,FAM133B.nAug10,FAM133B.sAug10	uc003umb.2,uc003umc.2,uc003umd.2	2.22675	2.4975	2.51542	18.4272	3.78938e-18	9.19139e-17
20:55048451:+,20:55059167:+	C20orf43	novel	NONE	NONE	NONE	NONE	0.795974	8.15728	-2.4486	18.4253	3.80046e-18	9.21525e-17
6:72003314:+,6:72006198:+	OGFRL1	novel	NONE	NONE	NONE	NONE	1.26645	8.27238	-2.39251	18.4197	3.83278e-18	9.28595e-17
12:116434486:+,12:116434815:+	MED13L	core	NM_015335	ENST00000281928	MED13L.aAug10	uc001tvw.2	1.76045	2.43443	1.95233	18.4182	3.84163e-18	9.30312e-17
1:154180124:+,1:154184934:+	C1orf43	extended	None	None	C1orf43.jAug10	uc009wos.1	-0.321236	5.19864	0.885314	18.4173	3.84698e-18	9.31392e-17
4:170038933:+,4:170041970:+	SH3RF1	core	NM_020870	ENST00000284637,ENST00000508685,ENST00000511421	SH3RF1.aAug10,SH3RF1.bAug10	uc003isa.1,uc010irc.1	3.15288	3.35568	1.67141	18.4168	3.85006e-18	9.31924e-17
11:120317794:+,11:120318943:+	ARHGEF12	novel	NONE	NONE	NONE	NONE	0.318922	8.11453	-2.47029	18.412	3.87826e-18	9.37455e-17
4:83348457:+,4:83349171:+	HNRPDL	novel	NONE	NONE	NONE	NONE	0.94378	7.77125	0.526992	18.4097	3.8924e-18	9.40657e-17
12:48853108:+,12:48880471:+	C12orf54	novel	NONE	NONE	NONE	NONE	-0.269148	8.03856	-2.50814	18.4085	3.89911e-18	9.41768e-17
4:83348717:+,4:83349431:+	HNRPDL	novel	NONE	NONE	NONE	NONE	0.94378	9.44969	-0.867769	18.4049	3.92097e-18	9.46692e-17
2:54024729:+,2:54036351:+	ERLEC1,LOC100302652	novel	NONE	NONE	NONE	NONE	0.00360101	8.01883	-2.51837	18.4006	3.94677e-18	9.52266e-17
8:105510304:+,8:105511545:+	LRP12	core	NM_001135703,NM_013437	ENST00000276654,ENST00000424843,ENST00000520770,ENST00000520873	LRP12.aAug10,LRP12.bAug10	uc003yma.2,uc003ymb.2	1.79425	2.02934	2.6562	18.3991	3.95617e-18	9.53933e-17
2:180853371:+,2:180858042:+	CWC22	core	NM_020943	ENST00000295749,ENST00000404136,ENST00000410053	CWC22andZNF385B.aAug10,CWC22andZNF385B.bAug10,CWC22andZNF385B.hAug10	uc002unp.2,uc010frh.1	1.95703	2.18682	2.34789	18.399	3.9564e-18	9.53933e-17
6:7290164:+,6:7298980:+	SSR1	novel	NONE	NONE	NONE	NONE	0.967337	8.1686	-2.44346	18.398	3.96287e-18	9.55055e-17
20:19956431:+,20:19970650:+	RIN2	core	NM_001242581,NM_018993	ENST00000255006,ENST00000484638	RIN2.aAug10,RIN2.bAug10	uc002wro.1,uc010gcv.1	1.43868	2.42754	2.20756	18.3954	3.97839e-18	9.58357e-17
5:14481393:+,5:14482691:+	TRIO	novel	NONE	NONE	NONE	NONE	0.325597	8.04484	-2.50476	18.3945	3.98421e-18	9.5954e-17
11:13722039:+,11:13743277:+	FAR1	novel	NONE	NONE	NONE	NONE	-0.0465023	8.22117	-2.41756	18.3933	3.99108e-18	9.60974e-17
5:34922873:+,5:34923238:+	BRIX1	novel	NONE	NONE	NONE	NONE	1.85648	9.18444	-1.93776	18.3903	4.00937e-18	9.63938e-17
20:31017234:+,20:31020683:+	ASXL1	novel	NONE	NONE	NONE	NONE	-0.440285	8.18049	-2.43851	18.39	4.01142e-18	9.64107e-17
17:62579662:+,17:62589558:+	SMURF2	novel	NONE	NONE	NONE	NONE	1.18703	8.48768	-2.28496	18.3877	4.02541e-18	9.66793e-17
3:194126845:+,3:194134488:+	ATP13A3	core	NM_024524	ENST00000256031,ENST00000439040	ATP13A3.aAug10	uc003fty.3	1.71466	3.31174	1.60309	18.3814	4.06467e-18	9.75122e-17
7:45797776:+,7:45798673:+	SEPT7P2	core	NR_024271	ENST00000398921,ENST00000417129,ENST00000428414,ENST00000428867,ENST00000429741,ENST00000443269,ENST00000450436	SEPT7P2.aAug10,SEPT7P2.eAug10,SEPT7P2.fAug10,SEPT7P2.gAug10,SEPT7P2.hAug10	uc003tnf.3,uc003tnh.2	0.635182	2.18008	2.43251	18.3776	4.08872e-18	9.79988e-17
12:116435035:+,12:116440808:+	MED13L	core	NM_015335	ENST00000281928	MED13L.aAug10	uc001tvw.2	1.76045	2.29608	2.12818	18.3758	4.09973e-18	9.81967e-17
16:28846508:+,16:28846870:+	ATXN2L	novel	NONE	NONE	NONE	NONE	-0.568755	8.14432	-2.45561	18.3752	4.1036e-18	9.82668e-17
15:52844301:+,15:52849297:+	ARPP19	core	NM_006628	ENST00000249822	ARPP19.aAug10,ARPP19.bAug10,ARPP19.cAug10,ARPP19.dAug10,ARPP19.eAug10,ARPP19.fAug10,ARPP19.gAug10,ARPP19.hAug10,ARPP19.kAug10,ARPP19.mAug10,ARPP19.nAug10	uc002acd.1,uc002ace.1	1.90328	2.1279	3.07405	18.367	4.15582e-18	9.94722e-17
6:44392320:+,6:44394219:+	CDC5L	novel	NONE	NONE	NONE	NONE	1.32614	8.13219	-2.4607	18.3648	4.17003e-18	9.97896e-17
1:39927709:+,1:39934287:+	MACF1	novel	NONE	NONE	NONE	NONE	-0.121599	8.19156	-2.43319	18.3609	4.1951e-18	1.00298e-16
2:187505694:+,2:187506113:+	ITGAV	core	NM_001144999,NM_001145000,NM_002210	ENST00000261023,ENST00000374907,ENST00000433736,ENST00000544640	ITGAV.aAug10,ITGAV.bAug10	uc002upq.2,uc010frs.2,uc010zfv.1	2.28123	2.17797	3.19807	18.3602	4.19909e-18	1.00371e-16
5:72864429:+,5:72865322:+	UTP15	core	NM_032175	ENST00000296792,ENST00000508491,ENST00000509005,ENST00000543251	UTP15.aAug10,UTP15.bAug10,UTP15.cAug10,UTP15.dAug10	uc003kcw.1,uc010ize.1,uc011cso.1,uc011csp.1	2.33587	2.38941	2.0202	18.3574	4.21759e-18	1.00744e-16
1:151212515:+,1:151219396:+	PIP5K1A	extended	None	ENST00000414290	PIP5K1A.eAug10	uc010pcv.1	0.785945	4.58139	0.910289	18.3531	4.24516e-18	1.01311e-16
11:118634015:+,11:118635917:+	DDX6	core	NM_004397	ENST00000264018,ENST00000526070,ENST00000534980	DDX6.aAug10,DDX6.bAug10	uc001pub.2,uc001puc.2	1.93343	2.01363	3.1849	18.3525	4.24932e-18	1.01387e-16
7:139316030:+,7:139316348:+	HIPK2	core	NM_001113239,NM_022740	ENST00000342645,ENST00000406875,ENST00000428878	HIPK2.aAug10,HIPK2.bAug10	uc003vvd.3,uc003vvf.3	2.56602	2.54084	2.24124	18.3483	4.27688e-18	1.01976e-16
9:35555698:+,9:35556305:+	RUSC2	novel	NONE	NONE	NONE	NONE	0.603847	8.05048	-2.50283	18.3477	4.28064e-18	1.02042e-16
10:90768754:+,10:90770296:+	FAS	core	NM_000043,NM_152871,NM_152872	ENST00000313771,ENST00000352159,ENST00000355279,ENST00000355740,ENST00000357339,ENST00000371857,ENST00000371875,ENST00000477270,ENST00000487314,ENST00000540197	STAMBPL1andFAS.dAug10,STAMBPL1andFAS.eAug10,STAMBPL1andFAS.gAug10,STAMBPL1andFAS.iAug10,STAMBPL1andFAS.jAug10,STAMBPL1andFAS.kAug10,STAMBPL1andFAS.lAug10,STAMBPL1andFAS.mAug10,STAMBPL1andFAS.nAug10,STAMBPL1andFAS.rAug10,STAMBPL1andFAS.vlAug10	uc001kfr.2,uc001kfs.2,uc001kft.2,uc009xtp.2,uc010qna.1	2.25982	2.31592	2.22168	18.3471	4.28482e-18	1.02119e-16
17:27835150:+,17:27837882:+	TAOK1	core	NM_020791,NM_025142	ENST00000261716,ENST00000536202	TAOK1.aAug10,TAOK1.bAug10,TAOK1.cAug10,TAOK1.dAug10	uc002hdz.1,uc002heb.1,uc010wbe.1,uc010wbf.1	2.33114	2.34733	2.38229	18.3384	4.34222e-18	1.03299e-16
7:5097410:+,7:5103326:+	RBAK	core	NM_001204456,NM_021163	ENST00000353796,ENST00000396912,ENST00000407184,ENST00000476992	RNF216LandRBAK.aAug10,RNF216LandRBAK.bAug10,RNF216LandRBAK.cAug10,RNF216LandRBAK.hAug10	uc003snr.2,uc003sns.1,uc010kss.1	1.88793	2.53699	1.92964	18.3379	4.34549e-18	1.0333e-16
12:4385386:+,12:4409026:+	CCND2	novel	NONE	NONE	NONE	NONE	0.883639	8.09472	-2.48099	18.3358	4.35974e-18	1.03646e-16
12:59276814:+,12:59280592:+	LRIG3	novel	NONE	NONE	NONE	NONE	2.08927	8.23736	-2.41049	18.334	4.37167e-18	1.03859e-16
7:107393956:+,7:107395863:+	CBLL1	novel	NONE	NONE	NONE	NONE	2.02235	8.01781	-2.51898	18.3331	4.37756e-18	1.03976e-16
7:73098003:+,7:73100966:+	WBSCR22	extended	None	None	WBSCR22.hAug10	None	0.978057	5.16956	0.792582	18.3303	4.39661e-18	1.04357e-16
7:72985302:+,7:72987650:+	TBL2	novel	NONE	NONE	NONE	NONE	-0.817584	8.13155	-2.46123	18.3257	4.42831e-18	1.05039e-16
1:226173224:+,1:226175597:+	C1orf55	core	NM_152608	ENST00000272091,ENST00000366817,ENST00000366818	C1orf55.aAug10	uc001hpu.3	2.4739	2.38328	2.3785	18.3247	4.43506e-18	1.05151e-16
10:104127317:+,10:104128968:+	GBF1	novel	NONE	NONE	NONE	NONE	-0.249569	8.31987	-2.36844	18.3176	4.4837e-18	1.06185e-16
3:156262228:+,3:156272746:+	SSR3	novel	NONE	NONE	NONE	NONE	0.254692	8.12546	-2.46475	18.3165	4.49111e-18	1.06336e-16
12:108091374:+,12:108104182:+	PWP1	novel	NONE	NONE	NONE	NONE	-1.81896	8.01746	-2.51907	18.3107	4.53147e-18	1.07268e-16
11:35201954:+,11:35236399:+	CD44	novel	NONE	NONE	NONE	NONE	0.98338	8.14335	-2.45567	18.3101	4.53573e-18	1.0732e-16
2:88857454:+,2:88858435:+	EIF2AK3	core	NM_004836	ENST00000303236,ENST00000415570,ENST00000419748,ENST00000535951	EIF2AK3.aAug10,EIF2AK3.bAug10,EIF2AK3.cAug10,EIF2AK3.hAug10,EIF2AK3.iAug10	uc002stc.3	2.82567	2.17037	2.30864	18.3023	4.59042e-18	1.08419e-16
17:37650947:+,17:37657503:+	CDK12	core	NM_015083,NM_016507	ENST00000430627,ENST00000447079	CDK12.aAug10,CDK12.bAug10	uc002hrw.3,uc010cvv.2,uc010wef.1	1.98142	2.19977	2.3379	18.3004	4.60353e-18	1.08705e-16
3:156876764:+,3:156877194:+	CCNL1	core	NM_020307	ENST00000295925,ENST00000295926,ENST00000461804,ENST00000465947,ENST00000467081,ENST00000470121,ENST00000471044,ENST00000475298,ENST00000476367,ENST00000477127,ENST00000479596	CCNL1.aAug10,CCNL1.bAug10,CCNL1.dAug10,CCNL1.eAug10,CCNL1.gAug10,CCNL1.hAug10,CCNL1.kAug10,CCNL1.pAug10,CCNL1.qAug10,CCNL1.rAug10,CCNL1.vcAug10	uc003fbd.1,uc003fbf.2,uc003fbg.2,uc003fbi.1,uc011bor.1	1.62486	2.14975	2.67342	18.2889	4.68632e-18	1.10486e-16
6:30645065:+,6:30646956:+	KIAA1949	core	NM_001134870,NM_133471	ENST00000274853,ENST00000399199,ENST00000467662,ENST00000488324	KIAA1949.aAug10,KIAA1949.bAug10,KIAA1949.dAug10,KIAA1949.fAug10	uc003nra.2,uc003nrb.3	0.651373	2.00138	2.6139	18.2867	4.7022e-18	1.10836e-16
13:25828102:+,13:25831334:+	MTMR6	novel	NONE	NONE	NONE	NONE	0.025478	8.29801	-2.37976	18.2861	4.7065e-18	1.109e-16
9:35059798:+,9:35060798:+	VCP	novel	NONE	NONE	NONE	NONE	1.19855	8.34597	-2.35549	18.286	4.70704e-18	1.109e-16
5:72865500:+,5:72866411:+	UTP15	core	NM_032175	ENST00000296792,ENST00000508491,ENST00000509005,ENST00000543251	UTP15.aAug10,UTP15.bAug10,UTP15.cAug10,UTP15.dAug10	uc003kcw.1,uc010ize.1,uc011cso.1,uc011csp.1	2.33587	2.60859	2.11932	18.285	4.71416e-18	1.11018e-16
11:35201954:+,11:35211382:+	CD44	novel	NONE	NONE	NONE	NONE	0.98338	8.16105	-2.44846	18.2812	4.74188e-18	1.11596e-16
1:150317023:+,1:150318494:+	PRPF3	core	NM_004698	ENST00000324862,ENST00000414970,ENST00000467329,ENST00000543398	PRPF3.aAug10,PRPF3.bAug10,PRPF3.cAug10,PRPF3.dAug10,PRPF3.eAug10,PRPF3.fAug10	uc001eum.3,uc009wlp.2,uc009wlq.1,uc010pca.1,uc010pcb.1	2.44204	2.10598	2.6555	18.2791	4.75753e-18	1.11839e-16
2:44139697:+,2:44145395:+	LRPPRC	novel	NONE	NONE	NONE	NONE	-0.154295	8.01034	-2.52192	18.274	4.79487e-18	1.12667e-16
14:52156653:+,14:52169230:+	FRMD6	novel	NONE	NONE	NONE	NONE	2.63454	8.86868	-2.09569	18.2701	4.82382e-18	1.13296e-16
13:111563117:+,13:111567072:+	ANKRD10	core	NM_017664	ENST00000267339,ENST00000310847,ENST00000375758,ENST00000460846,ENST00000465753	ANKRD10.aAug10,ANKRD10.bAug10,ANKRD10.cAug10,ANKRD10.dAug10,ANKRD10.fAug10,ANKRD10.gAug10,ANKRD10.hAug10,ANKRD10.iAug10,ANKRD10.kAug10,ANKRD10.nAug10	uc001vrn.2,uc001vro.1,uc001vrp.1	1.77696	2.19393	2.4525	18.2659	4.85524e-18	1.13932e-16
13:110864020:+,13:110864764:+	COL4A1	novel	NONE	NONE	NONE	NONE	1.62663	8.02342	-2.51512	18.2654	4.85914e-18	1.13999e-16
7:155471378:+,7:155473284:+	RBM33	core	NM_053043	ENST00000287912,ENST00000307403,ENST00000392759,ENST00000401878	RBM33.aAug10,RBM33.dAug10,RBM33.eAug10,RBM33.fAug10	uc003wme.2,uc010lqk.1	1.92486	2.07519	2.54788	18.265	4.86233e-18	1.14048e-16
22:36722706:+,22:36737415:+	MYH9	novel	NONE	NONE	NONE	NONE	0.359958	8.3563	-2.35134	18.2642	4.86831e-18	1.14137e-16
11:70277386:+,11:70278968:+	CTTN	novel	NONE	NONE	NONE	NONE	0.405202	8.01013	-2.52283	18.2632	4.87584e-18	1.14263e-16
1:213062599:+,1:213068558:+	FLVCR1	novel	NONE	NONE	NONE	NONE	3.3528	8.21908	-2.41844	18.2617	4.88689e-18	1.14471e-16
9:75766840:+,9:75773611:+	ANXA1	novel	NONE	NONE	NONE	NONE	0.548849	7.99017	-2.53182	18.258	4.91455e-18	1.15042e-16
17:33954524:+,17:33963360:+	AP2B1	novel	NONE	NONE	NONE	NONE	0.868862	7.98336	-2.53639	18.256	4.93006e-18	1.15379e-16
19:45157286:+,19:45162010:+	PVR	novel	NONE	NONE	NONE	NONE	0.449046	7.9766	-2.53968	18.2547	4.94019e-18	1.15591e-16
2:61722748:+,2:61725808:+	XPO1	novel	NONE	NONE	NONE	NONE	-0.928683	8.70509	-2.1751	18.2522	4.95938e-18	1.16014e-16
11:114310397:+,11:114320568:+	REXO2	novel	NONE	NONE	NONE	NONE	-0.634438	8.20729	-2.42552	18.2478	4.99271e-18	1.1669e-16
3:101576303:+,3:101578162:+	NFKBIZ	core	NM_001005474,NM_031419	ENST00000326151,ENST00000326172,ENST00000394054,ENST00000477601,ENST00000495089,ENST00000495719	NFKBIZ.aAug10,NFKBIZ.bAug10,NFKBIZ.cAug10,NFKBIZ.dAug10,NFKBIZ.gAug10,NFKBIZ.jAug10,NFKBIZ.mAug10	uc003dvo.2,uc003dvp.2,uc003dvq.2,uc010hpo.2	1.75018	2.01496	2.51375	18.2471	4.99848e-18	1.16799e-16
2:9533776:+,2:9540871:+	ASAP2	novel	NONE	NONE	NONE	NONE	-0.815298	7.96291	-2.54607	18.2456	5.01019e-18	1.17046e-16
19:39971601:+,19:39977037:+	TIMM50	novel	NONE	NONE	NONE	NONE	0.129469	8.24742	-2.40473	18.2447	5.01702e-18	1.1718e-16
4:26426365:+,4:26432314:+	RBPJ	novel	NONE	NONE	NONE	NONE	1.77846	8.07454	-2.48915	18.2347	5.095e-18	1.18843e-16
10:70960255:+,10:70962623:+	SUPV3L1	novel	NONE	NONE	NONE	NONE	0.211687	8.25868	-2.39953	18.2327	5.11045e-18	1.19151e-16
20:478424:+,20:480477:+	CSNK2A1	novel	NONE	NONE	NONE	NONE	1.86031	9.13636	-1.02422	18.2217	5.1987e-18	1.20887e-16
8:56668970:+,8:56685828:+	TGS1,TMEM68	extended	None	ENST00000523073	TMEM68.fAug10	None	0.776428	8.02267	-2.51567	18.2196	5.21504e-18	1.2124e-16
2:27663807:+,2:27664434:+	NRBP1	novel	NONE	NONE	NONE	NONE	0.14414	8.09912	-2.47856	18.2186	5.22309e-18	1.21376e-16
5:7885967:+,5:7891485:+	MTRR	novel	NONE	NONE	NONE	NONE	0.0613356	8.04203	-2.50759	18.2185	5.22452e-18	1.2138e-16
1:86172038:+,1:86173312:+	ZNHIT6	novel	NONE	NONE	NONE	NONE	0.830314	8.08032	-2.48795	18.2147	5.25503e-18	1.21981e-16
12:104328065:+,12:104332118:+	HSP90B1	extended	None	None	HSP90B1.mAug10	None	1.21257	5.73285	0.721418	18.2144	5.25723e-18	1.22005e-16
2:192548530:+,2:192550325:+	OBFC2A	novel	NONE	NONE	NONE	NONE	2.28345	8.35578	-2.35157	18.2126	5.27231e-18	1.22274e-16
10:27409476:+,10:27411770:+	YME1L1	novel	NONE	NONE	NONE	NONE	1.40718	8.22972	-2.41232	18.2082	5.3084e-18	1.22976e-16
2:86075327:+,2:86090485:+	ST3GAL5	novel	NONE	NONE	NONE	NONE	0.629256	8.06748	-2.49414	18.2063	5.32384e-18	1.2328e-16
10:61612460:+,10:61665880:+	CCDC6	core	NM_005436	ENST00000263102	CCDC6.aAug10	uc001jks.3	1.81281	2.03892	2.68376	18.1988	5.38557e-18	1.24599e-16
8:41456823:+,8:41471905:+	AGPAT6	novel	NONE	NONE	NONE	NONE	-1.05916	8.12368	-2.46601	18.1986	5.38741e-18	1.24614e-16
8:131193126:+,8:131200355:+	ASAP1	novel	NONE	NONE	NONE	NONE	-0.063717	7.97554	-2.53992	18.1857	5.49609e-18	1.27016e-16
1:23660217:+,1:23664247:+	HNRNPR	novel	NONE	NONE	NONE	NONE	0.893702	7.94117	-2.55714	18.1751	5.58683e-18	1.29e-16
5:142675155:+,5:142678233:+	NR3C1	core	NM_000176,NM_001018074,NM_001018075,NM_001018076,NM_001018077,NM_001020825,NM_001024094,NM_001204258,NM_001204259,NM_001204260,NM_001204261,NM_001204262,NM_001204263,NM_001204264,NM_001204265	ENST00000231509,ENST00000343796,ENST00000394464,ENST00000394466,ENST00000415690,ENST00000416954,ENST00000424646,ENST00000503201,ENST00000504572	NR3C1.aAug10,NR3C1.bAug10,NR3C1.cAug10,NR3C1.dAug10,NR3C1.eAug10,NR3C1.fAug10,NR3C1.gAug10,NR3C1.hAug10,NR3C1.iAug10,NR3C1.jAug10	uc003lmy.2,uc003lmz.2,uc003lna.2,uc003lnb.2,uc003lnc.2,uc003lnd.2,uc003lne.2,uc003lnf.2,uc011dbk.1	2.38617	2.21945	2.14857	18.1741	5.59598e-18	1.29183e-16
3:186293726:+,3:186299784:+	DNAJB11	novel	NONE	NONE	NONE	NONE	0.415585	8.22365	-2.41655	18.1738	5.59841e-18	1.29208e-16
2:11593924:+,2:11597305:+	E2F6	core	NM_198256,NR_003092	ENST00000307236,ENST00000362009,ENST00000381525,ENST00000444832,ENST00000468775	E2F6.aAug10,E2F6.bAug10,E2F6.cAug10,E2F6.iAug10,E2F6.lAug10	uc002rbf.2,uc002rbh.2,uc010yjl.1	1.9132	2.22435	2.27799	18.1715	5.61868e-18	1.29621e-16
1:100503872:+,1:100515465:+	HIAT1	core	NM_033055	ENST00000370152	HIAT1.aAug10	uc001dst.2	1.6535	2.24189	2.51308	18.1712	5.62099e-18	1.29646e-16
5:137844505:+,5:137846734:+	ETF1	novel	NONE	NONE	NONE	NONE	-0.599079	8.2233	-2.41609	18.1652	5.67318e-18	1.30767e-16
7:92404145:+,7:92465792:+	CDK6	novel	NONE	NONE	NONE	NONE	0.526745	8.58308	-2.23786	18.1652	5.6733e-18	1.30767e-16
5:68463905:+,5:68467097:+	CCNB1	novel	NONE	NONE	NONE	NONE	-0.567048	7.98863	-2.53377	18.164	5.68358e-18	1.30975e-16
3:30715738:+,3:30729876:+	TGFBR2	core	NM_001024847,NM_003242	ENST00000295754,ENST00000359013,ENST00000383765,ENST00000439925	TGFBR2.aAug10,TGFBR2.bAug10	uc003cen.2,uc003ceo.2	2.20714	2.11427	2.65574	18.1623	5.69933e-18	1.31223e-16
X:1714425:+,X:1718085:+	AKAP17A,ASMT	core	NM_005088,NR_027383	ENST00000313871,ENST00000381261,ENST00000474361	SFRS17AandASMT.1.aAug10,SFRS17AandASMT.1.bAug10,SFRS17AandASMT.1.cAug10	uc004cqa.2,uc004cqb.2,uc010ncx.1	2.31003	2.25778	2.45334	18.157	5.74568e-18	1.32175e-16
14:103852417:+,14:103928742:+	MARK3	novel	NONE	NONE	NONE	NONE	0.227578	7.96144	-2.54715	18.1547	5.76629e-18	1.32591e-16
12:77444524:+,12:77449635:+	E2F7	core	NM_203394	ENST00000322886,ENST00000416496,ENST00000550669,ENST00000551558	E2F7.aAug10,E2F7.bAug10	uc001sym.3,uc001syn.2	2.41687	3.37464	1.39384	18.1477	5.82959e-18	1.33842e-16
12:69203072:+,12:69233054:+	MDM2-B	extended	None	ENST00000393412,ENST00000393413	MDM2.lAug10	uc009zrg.2	2.96722	10.8051	-0.0695491	18.1451	5.85305e-18	1.34321e-16	Figure S1
1:247055221:+,1:247059137:+	AHCTF1	novel	NONE	NONE	NONE	NONE	1.07825	8.0537	-2.50087	18.142	5.88128e-18	1.3491e-16
14:50256061:+,14:50262509:+	SDCCAG1	novel	NONE	NONE	NONE	NONE	0.195243	8.41036	-2.32399	18.136	5.93646e-18	1.36087e-16
2:175957995:+,2:175962172:+	ATF2	core	NM_001256090,NM_001256091,NM_001256092,NM_001256093,NM_001880,NR_045768,NR_045769,NR_045770,NR_045771,NR_045772,NR_045773,NR_045774	ENST00000264110,ENST00000345739,ENST00000392544,ENST00000409437,ENST00000409635,ENST00000415955,ENST00000417080,ENST00000421438,ENST00000426833,ENST00000428760,ENST00000429579,ENST00000456655,ENST00000487334,ENST00000538946,ENST00000542046	ATF2andCHN1.aAug10,ATF2andCHN1.bAug10,ATF2andCHN1.cAug10,ATF2andCHN1.eAug10,ATF2andCHN1.fAug10,ATF2andCHN1.hAug10,ATF2andCHN1.iAug10,ATF2andCHN1.jAug10,ATF2andCHN1.kAug10,ATF2andCHN1.lAug10,ATF2andCHN1.mAug10,ATF2andCHN1.rAug10,ATF2andCHN1.sAug10	uc002ujl.2,uc002ujm.2,uc002ujn.2,uc002ujp.2,uc002ujq.2,uc002ujr.2,uc002ujs.2,uc002ujt.2,uc002uju.2,uc002ujv.2,uc002ujw.1,uc002ujx.1,uc010fqu.2,uc010fqv.2	0.624478	2.03075	2.62892	18.1331	5.9631e-18	1.36609e-16
7:151864463:+,7:151868349:+	MLL3	novel	NONE	NONE	NONE	NONE	1.57311	7.91954	-2.56741	18.1272	6.01832e-18	1.37784e-16
15:42503947:+,15:42510521:+	TMEM87A	novel	NONE	NONE	NONE	NONE	0.787612	8.43066	-2.31343	18.1248	6.04014e-18	1.38193e-16
10:30630569:+,10:30638048:+	MTPAP	core	NM_018109	ENST00000263063,ENST00000421701	MTPAP.bAug10,MTPAP.dAug10,MTPAP.eAug10,MTPAP.fAug10	uc001iva.3,uc001ivc.2	1.06119	2.05785	2.54689	18.1235	6.0528e-18	1.38392e-16
2:189918203:+,2:189918885:+	COL5A2	novel	NONE	NONE	NONE	NONE	1.2239	8.364	-2.34747	18.1223	6.0642e-18	1.38563e-16
12:69214154:+,12:69229609:+	MDM2	novel	NONE	NONE	NONE	NONE	2.96722	10.8582	0.263464	18.1212	6.07395e-18	1.38755e-16
17:37070728:+,17:37074858:+	LASP1	novel	NONE	NONE	NONE	NONE	0.332316	6.3651	0.40383	18.1205	6.08057e-18	1.38842e-16
5:39383373:+,5:39388901:+	DAB2	core	NM_001244871	ENST00000509337,ENST00000545653	DAB2andC9.aAug10	uc003jlw.2	-0.39195	5.20642	1.05479	18.1156	6.12728e-18	1.39761e-16
22:40825771:+,22:40827409:+	MKL1	core	NM_020831	ENST00000355630,ENST00000396617,ENST00000402042,ENST00000402630,ENST00000407029	MKL1.aAug10,MKL1.bAug10,MKL1.cAug10,MKL1.dAug10,MKL1.gAug10,MKL1.lAug10,MKL1.oAug10	uc003ayv.1,uc003ayw.1,uc010gye.1,uc010gyf.1	0.911398	2.16124	2.45718	18.1135	6.14736e-18	1.40189e-16
19:532108:+,19:536243:+	CDC34	novel	NONE	NONE	NONE	NONE	-0.899396	8.03394	-2.51103	18.1128	6.15403e-18	1.40311e-16
15:59974713:+,15:59981334:+	BNIP2	core	NM_004330	ENST00000267859,ENST00000417312,ENST00000477543,ENST00000560458	BNIP2.aAug10,BNIP2.cAug10,BNIP2.dAug10,BNIP2.gAug10	uc010uhc.1	1.72679	2.16664	2.46373	18.1049	6.23006e-18	1.41921e-16
2:153537850:+,2:153549552:+	PRPF40A	novel	NONE	NONE	NONE	NONE	-0.100902	7.93999	-2.55819	18.1029	6.24971e-18	1.42338e-16
12:93173076:+,12:93174056:+	EEA1	core	NM_003566	ENST00000322349	EEA1.aAug10	uc001tck.2	2.39664	2.31574	2.21691	18.1018	6.26023e-18	1.42546e-16
10:71920825:+,10:71930169:+	SAR1A	extended	None	None	SAR1AandTYSND1andAIFM2.vdAug10	None	1.21128	9.07661	-0.525871	18.0985	6.29271e-18	1.43162e-16
11:8705628:+,11:8707225:+	RPL27A	extended	None	ENST00000525981	RPL27AandSNORA3andSNORA45.mAug10	None	1.04892	5.11615	0.708185	18.0951	6.32519e-18	1.4387e-16
7:99006627:+,7:99008687:+	BUD31	extended	None	None	BUD31.dAug10	None	1.12661	3.83866	1.1636	18.0924	6.35186e-18	1.44414e-16
1:78354444:+,1:78383810:+	NEXN	novel	NONE	NONE	NONE	NONE	0.401713	8.02703	-2.51529	18.0893	6.38265e-18	1.44989e-16
1:173834685:+,1:173835315:+	GAS5	novel	NONE	NONE	NONE	NONE	0.884677	9.46172	0.0741978	18.0877	6.39879e-18	1.45324e-16
9:94991408:+,9:95004436:+	IARS	novel	NONE	NONE	NONE	NONE	0.409172	7.98065	-2.53694	18.0866	6.40972e-18	1.45541e-16
12:69203072:+,12:69229609:+	MDM2-A	extended	None	ENST00000348801,ENST00000360430,ENST00000428863,ENST00000540827	MDM2.gAug10,MDM2.iAug10	uc001suo.2,uc009zrh.2	2.96722	9.76993	2.68063	18.0848	6.42815e-18	1.45928e-16	Figure S1
5:83476339:+,5:83680126:+	EDIL3	novel	NONE	NONE	NONE	NONE	1.44179	8.03995	-2.50802	18.0841	6.43456e-18	1.46042e-16
1:180283857:+,1:180399315:+	ACBD6	novel	NONE	NONE	NONE	NONE	-0.257944	7.91872	-2.56845	18.0798	6.47827e-18	1.46813e-16
5:72864152:+,5:72864245:+	UTP15	core	NM_032175	ENST00000296792,ENST00000508491,ENST00000509005,ENST00000513824,ENST00000543251	UTP15.aAug10,UTP15.bAug10,UTP15.cAug10,UTP15.dAug10,UTP15.gAug10,UTP15.iAug10	uc003kcw.1,uc010ize.1,uc011cso.1,uc011csp.1	2.33587	2.50372	1.87901	18.075	6.52632e-18	1.47742e-16
14:75348719:+,14:75355978:+	DLST	novel	NONE	NONE	NONE	NONE	-1.28067	8.17605	-2.43956	18.0728	6.54901e-18	1.48179e-16
2:189916951:+,2:189917637:+	COL5A2	novel	NONE	NONE	NONE	NONE	1.2239	5.96359	0.685033	18.0711	6.56627e-18	1.48519e-16
11:32995095:+,11:32997880:+	QSER1	novel	NONE	NONE	NONE	NONE	0.975684	8.17563	-2.44116	18.0504	6.78184e-18	1.53197e-16
16:71956583:+,16:71961517:+	KIAA0174	novel	NONE	NONE	NONE	NONE	-0.872595	8.06497	-2.49541	18.0493	6.79341e-18	1.53392e-16
18:48573665:+,18:48575056:+	SMAD4	core	NM_005359	ENST00000342988,ENST00000398417,ENST00000452201,ENST00000544926	ELAC1andSMAD4.aAug10,ELAC1andSMAD4.eAug10,ELAC1andSMAD4.fAug10,ELAC1andSMAD4.hAug10,ELAC1andSMAD4.iAug10,ELAC1andSMAD4.kAug10,ELAC1andSMAD4.uAug10,ELAC1andSMAD4.vbAug10	uc010xdo.1,uc010xdp.1	0.998169	2.00505	2.43617	18.0475	6.81265e-18	1.53761e-16
9:35060522:+,9:35061012:+	VCP	novel	NONE	NONE	NONE	NONE	1.19855	8.2998	-2.37976	18.0427	6.86373e-18	1.54781e-16
19:30097232:+,19:30102769:+	POP4	novel	NONE	NONE	NONE	NONE	0.37043	8.12104	-2.46793	18.0412	6.87955e-18	1.55071e-16
1:249111083:+,1:249118952:+	SH3BP5L	core	NM_030645	ENST00000366472	SH3BP5L.aAug10	uc001iew.1	1.89954	2.38829	2.03088	18.0357	6.93872e-18	1.56271e-16
11:13441292:+,11:13443189:+	BTBD10	core	NM_032320	ENST00000278174,ENST00000525108,ENST00000525661,ENST00000525864,ENST00000527102,ENST00000528120,ENST00000530907,ENST00000532261	BTBD10.aAug10,BTBD10.bAug10,BTBD10.cAug10,BTBD10.dAug10,BTBD10.eAug10,BTBD10.fAug10,BTBD10.gAug10,BTBD10.iAug10,BTBD10.jAug10,BTBD10.kAug10,BTBD10.lAug10,BTBD10.mAug10,BTBD10.nAug10	uc001mkz.2,uc001mla.2,uc009ygn.2,uc009ygo.2,uc010rcl.1,uc010rcm.1,uc010rcn.1	1.1058	2.11648	2.56045	18.0352	6.94374e-18	1.56351e-16
7:19738350:+,7:19739695:+	TWISTNB	core	NM_001002926	ENST00000222567,ENST00000462263	TWISTNB.aAug10,TWISTNB.bAug10	uc003sup.1	2.20736	2.09365	2.91408	18.0307	6.99336e-18	1.57367e-16
11:64888278:+,11:64888972:+	FAU	extended	None	ENST00000279259	FAU.fAug10	None	1.07757	3.37311	1.33262	18.0281	7.02133e-18	1.57929e-16
20:48700791:+,20:48729644:+	TMEM189-UBE2V1,UBE2V1	extended	None	ENST00000396059,ENST00000493090	TMEM189-UBE2V1.vdAug10,TMEM189-UBE2V1.vfAug10	uc002xvb.2	-0.0870057	2.48038	2.07906	18.027	7.03379e-18	1.58175e-16
6:170863551:+,6:170865970:+	TBP	core	NM_003194	ENST00000392091,ENST00000392092,ENST00000421512	TBP.aAug10	uc003qxu.2	0.0242234	2.12953	2.28949	18.013	7.1885e-18	1.61516e-16
5:16694723:+,5:16701072:+	MYO10	novel	NONE	NONE	NONE	NONE	0.0759128	7.89643	-2.57867	18.0117	7.20318e-18	1.61812e-16
X:135954504:+,X:135957417:+	RBMX	novel	NONE	NONE	NONE	NONE	-0.0481925	8.2559	-2.39771	18.0092	7.23193e-18	1.62388e-16
7:148892846:+,7:148895425:+	ZNF282	core	NM_003575	ENST00000262085,ENST00000430197,ENST00000479907	ZNF282.aAug10,ZNF282.bAug10,ZNF282.dAug10,ZNF282.fAug10	uc003wfm.2,uc011kun.1	2.09846	2.29445	2.09684	18.0076	7.24918e-18	1.62741e-16
12:69233581:+,12:69235612:+	MDM2	novel	NONE	NONE	NONE	NONE	2.96722	2.84427	1.61167	18.0062	7.26558e-18	1.63074e-16
1:1341266:+,1:1342511:+	MRPL20	novel	NONE	NONE	NONE	NONE	0.936984	4.54805	0.982791	18.0036	7.29469e-18	1.63686e-16
14:39646688:+,14:39648295:+	PNN	novel	NONE	NONE	NONE	NONE	0.601585	8.36858	-2.34537	18.0018	7.31586e-18	1.64098e-16
16:58621317:+,16:58622703:+	CNOT1	novel	NONE	NONE	NONE	NONE	0.146976	7.94527	-2.55515	18.0008	7.32704e-18	1.64313e-16
1:243385115:+,1:243388478:+	CEP170	core	NM_001042404,NM_001042405,NM_014812	ENST00000366542,ENST00000366543,ENST00000366544,ENST00000424081,ENST00000522191,ENST00000522522,ENST00000522995,ENST00000523424,ENST00000523581,ENST00000532008	CEP170.aAug10,CEP170.bAug10,CEP170.cAug10,CEP170.dAug10,CEP170.oAug10,CEP170.pAug10,CEP170.sAug10,CEP170.tAug10,CEP170.vaAug10,CEP170.vdAug10	uc001hzs.2,uc001hzt.2,uc001hzu.2	1.43827	2.11479	2.8716	17.9994	7.34281e-18	1.64597e-16
10:133753700:+,10:133757472:+	PPP2R2D	novel	NONE	NONE	NONE	NONE	0.463591	7.93837	-2.55799	17.999	7.34771e-18	1.64672e-16
3:12641307:+,3:12645635:+	RAF1	novel	NONE	NONE	NONE	NONE	0.248312	8.34126	-2.35863	17.9978	7.36086e-18	1.64931e-16
8:103373434:+,8:103424401:+	UBR5	novel	NONE	NONE	NONE	NONE	0.525069	8.08938	-2.48379	17.9974	7.36648e-18	1.65022e-16
12:80182563:+,12:80187643:+	PPP1R12A	novel	NONE	NONE	NONE	NONE	0.886723	7.94513	-2.55461	17.9951	7.39215e-18	1.65527e-16
12:57485781:+,12:57486231:+	NAB2	core	NM_005967	ENST00000300131,ENST00000342556	NAB2.aAug10,NAB2.bAug10	uc001smz.2	0.994704	2.33004	2.08354	17.9922	7.42628e-18	1.66185e-16
10:81109509:+,10:81113463:+	PPIF	novel	NONE	NONE	NONE	NONE	-0.624199	8.00589	-2.52398	17.9897	7.45515e-18	1.66795e-16
10:92654648:+,10:92655637:+	RPP30	extended	None	ENST00000371705,ENST00000414836	RPP30.bAug10,RPP30.eAug10,RPP30.jAug10	None	-0.200796	6.20524	0.449944	17.9868	7.48866e-18	1.67474e-16
19:49458219:+,19:49459455:+	BAX	extended	None	ENST00000506183	BAX.mAug10,BAX.nAug10	uc002plh.1,uc002plm.2	-0.0542794	2.98855	1.56612	17.9845	7.51569e-18	1.67971e-16
12:116453079:+,12:116457029:+	MED13L	core	NM_015335	ENST00000281928	MED13L.aAug10	uc001tvw.2	1.76045	2.54431	2.07309	17.9824	7.54081e-18	1.68461e-16
19:33076813:+,19:33078159:+	PDCD5	novel	NONE	NONE	NONE	NONE	-0.0506489	8.89076	-2.08333	17.9773	7.60071e-18	1.69655e-16
7:94053755:+,7:94054922:+	COL1A2	novel	NONE	NONE	NONE	NONE	1.21804	7.64979	0.649298	17.9703	7.68514e-18	1.71467e-16
16:67178279:+,16:67179279:+	C16orf70	novel	NONE	NONE	NONE	NONE	1.27643	7.91687	-2.56954	17.9693	7.69676e-18	1.7169e-16
12:88909394:+,12:88910111:+	KITLG	core	NM_000899	ENST00000228280,ENST00000378535	KITLG.aAug10,KITLG.cAug10	uc001tav.2	3.45509	2.59183	1.89419	17.9688	7.70244e-18	1.71744e-16
6:155116273:+,6:155124678:+	RBM16	novel	NONE	NONE	NONE	NONE	1.54213	8.17955	-2.43963	17.9652	7.74643e-18	1.72578e-16
6:160148735:+,6:160160022:+	WTAP	novel	NONE	NONE	NONE	NONE	1.24532	7.93057	-2.56325	17.9573	7.84275e-18	1.74576e-16
10:27425314:+,10:27434357:+	YME1L1	core	NM_001253866	ENST00000375972,ENST00000427324	YME1L1.cAug10	uc010qdl.1	1.40718	4.15886	1.15506	17.955	7.87042e-18	1.75155e-16
21:30440026:+,21:30445852:+	CCT8	novel	NONE	NONE	NONE	NONE	0.635138	8.10151	-2.4754	17.9449	7.99683e-18	1.7778e-16
11:118774161:+,11:118778192:+	BCL9L	core	NM_182557	ENST00000334801,ENST00000392849,ENST00000431085,ENST00000526143,ENST00000526514	BCL9L.aAug10,BCL9L.bAug10	uc001pug.2,uc009zal.2	1.26848	2.18383	2.15626	17.9413	8.04135e-18	1.78619e-16
1:203786252:+,1:203787624:+	ZC3H11A	novel	NONE	NONE	NONE	NONE	1.71202	7.93739	-2.55857	17.939	8.07021e-18	1.79184e-16
1:235299085:+,1:235301192:+	RBM34	extended	None	None	ARID4BandRBM34.iAug10	None	-0.679996	8.20321	-2.42749	17.9374	8.09114e-18	1.79574e-16
1:94671239:+,1:94674810:+	ARHGAP29	novel	NONE	NONE	NONE	NONE	1.4541	8.24787	-2.40554	17.9357	8.11273e-18	1.79977e-16
1:183876235:+,1:183881216:+	RGL1	core	NM_015149	ENST00000304685,ENST00000360851,ENST00000367531,ENST00000536277,ENST00000539189,ENST00000543395	RGL1.aAug10,RGL1.bAug10,RGL1.cAug10,RGL1.dAug10,RGL1.eAug10,RGL1.fAug10,RGL1.gAug10,RGL1.lAug10	uc001gqm.2,uc001gqo.2,uc010pof.1,uc010pog.1,uc010poh.1,uc010poi.1	2.33894	2.5028	1.84948	17.931	8.17205e-18	1.81216e-16
3:176767926:+,3:176768266:+	TBL1XR1	core	NM_024665	ENST00000430069,ENST00000457928	TBL1XR1.aAug10,TBL1XR1.bAug10	uc003fiw.3,uc003fix.3	1.53094	2.12285	2.5474	17.9304	8.17991e-18	1.81314e-16
2:189871178:+,2:189872226:+	COL3A1	novel	NONE	NONE	NONE	NONE	1.02139	4.64713	1.02815	17.9302	8.1827e-18	1.81338e-16
4:39902127:+,4:39905660:+	PDS5A	novel	NONE	NONE	NONE	NONE	0.137235	8.33087	-2.36419	17.9284	8.20552e-18	1.81805e-16
9:86593194:+,9:86595068:+	HNRNPK	novel	NONE	NONE	NONE	NONE	0.611671	8.10686	-2.4759	17.9277	8.21518e-18	1.81954e-16
2:180846724:+,2:180851422:+	CWC22	core	NM_020943	ENST00000295749,ENST00000404136,ENST00000410053	CWC22andZNF385B.aAug10,CWC22andZNF385B.bAug10,CWC22andZNF385B.hAug10	uc002unp.2,uc010frh.1	1.95703	2.14567	2.28958	17.9274	8.21895e-18	1.81955e-16
10:18955564:+,10:18957459:+	ARL5B	core	NM_178815	ENST00000377275	ARL5B.aAug10,ARL5B.bAug10	uc001iqd.1	2.42149	2.5127	2.40203	17.9224	8.28343e-18	1.83202e-16
7:132709387:+,7:132766617:+	CHCHD3	novel	NONE	NONE	NONE	NONE	-0.642463	7.93012	-2.5613	17.9223	8.28424e-18	1.83202e-16
22:41531910:+,22:41533657:+	EP300	core	NM_001429	ENST00000263253	EP300.aAug10	uc003azl.3	2.20621	2.22448	2.20153	17.9218	8.29063e-18	1.83249e-16
20:2465302:+,20:2473345:+	ZNF343	core	NM_024325	ENST00000278772,ENST00000445484,ENST00000465019	ZNF343andSNRPB.bAug10,ZNF343andSNRPB.cAug10,ZNF343andSNRPB.dAug10,ZNF343andSNRPB.nAug10,ZNF343andSNRPB.uAug10	uc002wgd.1,uc002wge.1,uc010gao.1	2.33008	3.31965	1.54899	17.9196	8.32015e-18	1.83842e-16
14:68118198:+,14:68123133:+	ARG2,VTI1B	extended	None	ENST00000554636	VTI1BandCOX7A2P1.dAug10	None	0.458552	3.87884	1.16965	17.9188	8.32943e-18	1.84008e-16
X:23748681:+,X:23751289:+	ACOT9	novel	NONE	NONE	NONE	NONE	-0.573933	7.90187	-2.57724	17.9187	8.33132e-18	1.84011e-16
3:38291509:+,3:38293819:+	OXSR1	novel	NONE	NONE	NONE	NONE	0.985531	8.03063	-2.51243	17.9147	8.38405e-18	1.85021e-16
14:58737203:+,14:58738569:+	FLJ31306,PSMA3	novel	NONE	NONE	NONE	NONE	0.481549	8.03076	-2.51282	17.9128	8.40843e-18	1.8552e-16
18:2752550:+,18:2762103:+	SMCHD1	novel	NONE	NONE	NONE	NONE	-0.0544112	7.90885	-2.57355	17.9108	8.43452e-18	1.86002e-16
13:31725328:+,13:31728770:+	HSPH1	extended	None	ENST00000429785	HSPH1.gAug10	uc010tds.1	0.618709	7.2205	0.485538	17.9106	8.43834e-18	1.86024e-16
8:128806980:+,8:129001408:+	PVT1	novel	NONE	NONE	NONE	NONE	1.27778	7.95055	-2.55286	17.9092	8.45646e-18	1.86381e-16
3:196867135:+,3:196921296:+	DLG1	novel	NONE	NONE	NONE	NONE	0.024506	7.83652	-2.60911	17.9047	8.51595e-18	1.8746e-16
6:53134068:+,6:53138018:+	ELOVL5	novel	NONE	NONE	NONE	NONE	-0.237652	7.92256	-2.56738	17.8924	8.68208e-18	1.90917e-16
20:10623249:+,20:10625005:+	JAG1	novel	NONE	NONE	NONE	NONE	0.767572	8.17813	-2.4404	17.8801	8.85097e-18	1.94509e-16
21:46229033:+,21:46237863:+	SUMO3	extended	None	None	SUMO3.mAug10	None	0.62589	4.87136	1.27942	17.8789	8.86763e-18	1.94834e-16
16:11781822:+,16:11791981:+	TXNDC11	novel	NONE	NONE	NONE	NONE	-0.679264	7.88701	-2.58447	17.8786	8.87261e-18	1.94903e-16
17:55026795:+,17:55027250:+	COIL	novel	NONE	NONE	NONE	NONE	0.926271	8.28676	-2.38489	17.8774	8.88934e-18	1.95189e-16
7:84666349:+,7:84671487:+	SEMA3D	novel	NONE	NONE	NONE	NONE	-0.848227	8.01083	-2.52068	17.8745	8.92932e-18	1.96026e-16
21:30333028:+,21:30338692:+	LTN1	novel	NONE	NONE	NONE	NONE	1.26626	7.90825	-2.57251	17.8743	8.93307e-18	1.96067e-16
20:61835159:+,20:61846929:+	YTHDF1	novel	NONE	NONE	NONE	NONE	1.09923	7.93617	-2.56004	17.8739	8.93871e-18	1.9615e-16
14:23299463:+,14:23303381:+	MRPL52	core	NM_181307	ENST00000397505,ENST00000556465,ENST00000557221	MRPL52.fAug10,MRPL52.gAug10,MRPL52.hAug10	uc001whb.3	0.75454	2.46445	2.18618	17.8732	8.94782e-18	1.96309e-16
22:41564871:+,22:41565507:+	EP300	core	NM_001429	ENST00000263253	EP300.aAug10	uc003azl.3	2.20621	2.1569	2.26466	17.8719	8.96585e-18	1.96605e-16
21:38868560:+,21:38877586:+	DYRK1A	core	NM_001396,NM_101395,NM_130436,NM_130438	ENST00000321219,ENST00000338785,ENST00000339659,ENST00000398956,ENST00000398960,ENST00000451934,ENST00000455387	DYRK1A.aAug10,DYRK1A.bAug10,DYRK1A.cAug10,DYRK1A.dAug10,DYRK1A.eAug10,DYRK1A.gAug10	uc002ywi.2,uc002ywj.2,uc002ywk.2,uc002ywl.2,uc002ywm.2,uc011aei.1	2.34915	2.4472	1.94752	17.8673	9.03184e-18	1.97966e-16
3:57561400:+,3:57582801:+	ARF4	novel	NONE	NONE	NONE	NONE	0.510331	8.11219	-2.47248	17.8625	9.10033e-18	1.99323e-16
5:95242486:+,5:95249475:+	ELL2	core	NM_012081	ENST00000237853	ELL2.aAug10,ELL2.dAug10	uc003klr.3	1.76837	2.05869	2.5432	17.8614	9.11515e-18	1.99606e-16
2:3624220:+,2:3627700:+	RPS7	novel	NONE	NONE	NONE	NONE	1.17647	8.08702	-2.48527	17.8611	9.12007e-18	1.99672e-16
7:75052486:+,7:75053809:+	POM121C	novel	NONE	NONE	NONE	NONE	0.434968	8.39754	-2.33095	17.8577	9.16923e-18	2.00706e-16
22:41553412:+,22:41554416:+	EP300	core	NM_001429	ENST00000263253	EP300.aAug10,EP300.gAug10	uc003azl.3	2.20621	2.09453	2.28811	17.8562	9.1896e-18	2.01069e-16
7:120990604:+,7:121000097:+	FAM3C	novel	NONE	NONE	NONE	NONE	1.13459	8.20739	-2.42495	17.8544	9.21561e-18	2.01554e-16
9:86586271:+,9:86586797:+	HNRNPK	novel	NONE	NONE	NONE	NONE	0.611671	7.90085	-2.57792	17.8534	9.23145e-18	2.01816e-16
3:30713929:+,3:30715597:+	TGFBR2	core	NM_001024847,NM_003242	ENST00000295754,ENST00000359013,ENST00000383765,ENST00000439925	TGFBR2.aAug10,TGFBR2.bAug10	uc003cen.2,uc003ceo.2	2.20714	2.09647	2.27946	17.8509	9.26775e-18	2.02568e-16
13:41902979:+,13:41932440:+	NAA16	novel	NONE	NONE	NONE	NONE	1.4621	8.14791	-2.45541	17.8492	9.29178e-18	2.03009e-16
10:13653683:+,10:13658398:+	PRPF18	novel	NONE	NONE	NONE	NONE	2.0355	8.25849	-2.39967	17.8439	9.37022e-18	2.04553e-16
5:60790237:+,5:60817090:+	ZSWIM6	core	NM_020928	ENST00000252744	ZSWIM6.aAug10	uc003jsr.2	2.05337	2.40142	2.164	17.8414	9.40735e-18	2.05278e-16
9:33026988:+,9:33030438:+	DNAJA1	extended	None	None	DNAJA1.iAug10	None	0.654528	8.0889	0.25504	17.8346	9.50823e-18	2.07222e-16
22:38890807:+,22:38894090:+	DDX17	novel	NONE	NONE	NONE	NONE	0.657587	7.95604	-2.55002	17.8322	9.54322e-18	2.07941e-16
1:247053361:+,1:247055081:+	AHCTF1	novel	NONE	NONE	NONE	NONE	1.07825	7.84988	-2.60204	17.826	9.63716e-18	2.09771e-16
10:115894814:+,10:115895907:+	C10orf118	novel	NONE	NONE	NONE	NONE	1.60799	7.89306	-2.58135	17.8181	9.75823e-18	2.12318e-16
12:133312098:+,12:133324418:+	ANKLE2	novel	NONE	NONE	NONE	NONE	1.37562	7.80504	-2.62475	17.8158	9.79304e-18	2.12988e-16
5:109155588:+,5:109159424:+	MAN2A1	novel	NONE	NONE	NONE	NONE	0.186036	8.03573	-2.51139	17.815	9.80594e-18	2.13203e-16
12:69229764:+,12:69233054:+	MDM2	extended	None	ENST00000348801,ENST00000428863,ENST00000543323	MDM2.iAug10,MDM2.pAug10	uc009zra.2,uc009zrh.2	2.96722	6.90428	0.795337	17.8147	9.80992e-18	2.13222e-16
7:123344711:+,7:123346331:+	WASL	core	NM_003941	ENST00000223023,ENST00000536685	WASL.aAug10	uc003vkz.2	1.98815	2.11637	2.7236	17.8138	9.82501e-18	2.13462e-16
6:111650941:+,6:111654326:+	REV3L	novel	NONE	NONE	NONE	NONE	1.15146	7.82002	-2.61706	17.8122	9.84907e-18	2.13941e-16
20:2636860:+,20:2637420:+	NOP56	extended	None	None	NOP56_.uAug10	None	-0.277341	2.0512	2.36552	17.8098	9.88593e-18	2.14653e-16
22:41536261:+,22:41537052:+	EP300	core	NM_001429	ENST00000263253	EP300.aAug10	uc003azl.3	2.20621	2.35763	2.35445	17.8041	9.97585e-18	2.16382e-16
1:249119565:+,1:249120034:+	SH3BP5L	core	NM_030645	ENST00000366472	SH3BP5L.aAug10	uc001iew.1	1.89954	2.55549	1.86263	17.7961	1.0102e-17	2.18937e-16
8:71495559:+,8:71499341:+	TRAM1	novel	NONE	NONE	NONE	NONE	0.983049	7.93488	-2.56098	17.7952	1.01161e-17	2.19198e-16
2:178098999:+,2:178128131:+	NFE2L2	core	NM_001145412,NM_001145413	ENST00000397063,ENST00000423513,ENST00000446151,ENST00000449627,ENST00000477534	NFE2L2.cAug10,NFE2L2.dAug10,NFE2L2.eAug10,NFE2L2.nAug10,NFE2L2.qAug10,NFE2L2.vdAug10	uc002ulg.3,uc010fra.2,uc010frb.2,uc010zfa.1	1.76397	2.29319	2.24483	17.7936	1.01423e-17	2.19676e-16
13:31221194:+,13:31227285:+	USPL1	core	NM_005800	ENST00000255304	USPL1.aAug10,USPL1.bAug10,USPL1.cAug10	uc001utc.2,uc001utd.2,uc001ute.1	2.88417	2.65921	1.96366	17.7933	1.01469e-17	2.1973e-16
X:73815835:+,X:73834257:+	RLIM	core	NM_016120	ENST00000332687	RLIMandPABPC1P3.aAug10,RLIMandPABPC1P3.eAug10,RLIMandPABPC1P3.hAug10	uc004ebw.2	2.70255	3.58354	1.3204	17.7928	1.01551e-17	2.19816e-16
8:29927575:+,8:29940363:+	TMEM66	extended	None	ENST00000518340,ENST00000520303,ENST00000536273	TMEM66.gAug10,TMEM66.hAug10,TMEM66.kAug10	uc003xhv.2	1.08	3.44744	1.33728	17.7901	1.01976e-17	2.20647e-16
5:70237335:+,5:70238545:+	SMN1,SMN2	extended	None	ENST00000514951	SERF1AandSMN1.gAug10	uc011crr.1	1.96317	6.26005	0.485465	17.7877	1.02365e-17	2.21396e-16
18:9122679:+,18:9126829:+	NDUFV2	novel	NONE	NONE	NONE	NONE	0.112845	7.84185	-2.60574	17.785	1.02812e-17	2.22317e-16
13:97928663:+,13:97986530:+	MBNL2	core	NM_144778,NM_207304	ENST00000343600,ENST00000345429,ENST00000376673,ENST00000376679,ENST00000397601,ENST00000445661,ENST00000469707	MBNL2.aAug10,MBNL2.bAug10,MBNL2.cAug10,MBNL2.dAug10,MBNL2.eAug10	uc001vmz.2,uc001vna.2,uc001vnb.2,uc010aft.2,uc010tij.1	1.8283	2.24057	2.10568	17.7826	1.03202e-17	2.23116e-16
10:32308887:+,10:32311068:+	KIF5B	novel	NONE	NONE	NONE	NONE	-0.478078	7.94177	-2.55518	17.7817	1.03347e-17	2.23383e-16
4:152020866:+,4:152022127:+	RPS3A	novel	NONE	NONE	NONE	NONE	1.00678	7.80443	-2.62475	17.7814	1.03393e-17	2.23437e-16
8:99054946:+,8:99057575:+	RPL30	novel	NONE	NONE	NONE	NONE	1.04338	7.83431	-2.61094	17.7793	1.03735e-17	2.24129e-16
12:116425093:+,12:116428825:+	MED13L	core	NM_015335	ENST00000281928	MED13L.aAug10	uc001tvw.2	1.76045	2.14861	2.62617	17.7782	1.03919e-17	2.24482e-16
1:42654599:+,1:42656974:+	FOXJ3	novel	NONE	NONE	NONE	NONE	1.54118	7.9347	-2.55915	17.7762	1.04244e-17	2.25137e-16
8:90921949:+,8:90926305:+	OSGIN2	core	NM_001126111,NM_004337	ENST00000297438,ENST00000451899,ENST00000520659	OSGIN2.aAug10,OSGIN2.bAug10,OSGIN2.cAug10	uc003yeg.2,uc003yeh.2	2.01184	2.04765	2.53381	17.7756	1.04337e-17	2.25292e-16
19:5667175:+,19:5667831:+	SAFB	novel	NONE	NONE	NONE	NONE	-0.23122	7.88525	-2.58575	17.7743	1.04556e-17	2.25719e-16
7:150931360:+,7:150934460:+	CHPF2	novel	NONE	NONE	NONE	NONE	-0.130058	7.80413	-2.6259	17.7669	1.05788e-17	2.2819e-16
3:98544210:+,3:98619966:+	DCBLD2	novel	NONE	NONE	NONE	NONE	1.72303	7.86338	-2.59519	17.7637	1.06325e-17	2.29208e-16
12:69218210:+,12:69229609:+	MDM2	novel	NONE	NONE	NONE	NONE	2.96722	10.5928	-0.175476	17.7628	1.06476e-17	2.29486e-16
8:141840625:+,8:141856698:+	PTK2	extended	None	ENST00000524357	PTK2.vnAug10	None	-0.708659	7.8116	-2.62239	17.7619	1.06627e-17	2.29765e-16
2:192248068:+,2:192251950:+	MYO1B	novel	NONE	NONE	NONE	NONE	0.587769	7.87043	-2.59327	17.7596	1.07014e-17	2.30504e-16
2:224464014:+,2:224467003:+	SCG2	core	NM_003469	ENST00000305409	SCG2.aAug10	uc002vnm.2	2.17427	2.17621	2.46349	17.7593	1.07055e-17	2.30508e-16
14:102515006:+,14:102515251:+	DYNC1H1	novel	NONE	NONE	NONE	NONE	0.0486962	7.94816	-2.55352	17.755	1.07796e-17	2.31951e-16
2:128075893:+,2:128079622:+	MAP3K2	core	NM_006609	ENST00000344908,ENST00000409947	MAP3K2.aAug10,MAP3K2.bAug10	uc002toj.1	2.72744	2.99765	1.66965	17.7535	1.0804e-17	2.32381e-16
5:16701947:+,5:16703034:+	MYO10	novel	NONE	NONE	NONE	NONE	0.0759128	7.93406	-2.56198	17.7529	1.08146e-17	2.32557e-16
1:222757639:+,1:222761785:+	TAF1A	core	NM_001201536,NM_005681	ENST00000350027,ENST00000352967,ENST00000391883,ENST00000433270,ENST00000465263,ENST00000487009,ENST00000543857	TAF1A.aAug10,TAF1A.bAug10,TAF1A.eAug10,TAF1A.fAug10,TAF1A.gAug10,TAF1A.iAug10	uc001hnj.2,uc009xdz.1,uc010pur.1	1.81195	2.67182	1.77116	17.7527	1.08188e-17	2.32557e-16
10:88230860:+,10:88231965:+	WAPAL	core	NM_015045	ENST00000298767,ENST00000342368,ENST00000372076,ENST00000489996	WAPAL.aAug10,WAPAL.bAug10,WAPAL.cAug10,WAPAL.fAug10	uc001kdn.2,uc001kdo.2,uc009xsw.2	1.81549	2.14982	2.20286	17.7519	1.08322e-17	2.32749e-16
2:242590526:+,2:242593961:+	ATG4B	novel	NONE	NONE	NONE	NONE	-0.649858	7.81895	-2.61719	17.7517	1.08357e-17	2.32778e-16
16:58202597:+,16:58230637:+	CSNK2A2	novel	NONE	NONE	NONE	NONE	0.346015	8.01488	-2.52096	17.7453	1.09453e-17	2.34939e-16
20:13698161:+,20:13709025:+	ESF1	novel	NONE	NONE	NONE	NONE	0.125367	7.81118	-2.62269	17.7399	1.10394e-17	2.36767e-16
7:66019824:+,7:66057244:+	LOC493754	novel	NONE	NONE	NONE	NONE	-2.65645	8.06045	-2.49565	17.7287	1.12368e-17	2.40722e-16
4:170043417:+,4:170051197:+	SH3RF1	core	NM_020870	ENST00000284637,ENST00000508685	SH3RF1.aAug10	uc003isa.1	3.15288	2.86832	1.71822	17.7244	1.13127e-17	2.42098e-16
8:95942956:+,8:95952088:+	TP53INP1	core	NM_033285	ENST00000342697	TP53INP1.aAug10	uc003yhg.2	3.64076	4.23953	1.00433	17.7244	1.13133e-17	2.42098e-16
13:111558471:+,13:111562965:+	ANKRD10	core	NM_017664	ENST00000267339,ENST00000310847,ENST00000375758,ENST00000460846,ENST00000465753,ENST00000489973,ENST00000494859	ANKRD10.aAug10,ANKRD10.bAug10,ANKRD10.cAug10,ANKRD10.dAug10,ANKRD10.fAug10,ANKRD10.gAug10,ANKRD10.hAug10,ANKRD10.iAug10,ANKRD10.jAug10,ANKRD10.kAug10,ANKRD10.nAug10,ANKRD10.oAug10,ANKRD10.sAug10,ANKRD10.tAug10	uc001vrn.2,uc001vro.1,uc001vrp.1	1.77696	2.28732	2.50986	17.719	1.14109e-17	2.44039e-16
20:21311343:+,20:21312406:+	XRN2	novel	NONE	NONE	NONE	NONE	-0.81848	7.82567	-2.61565	17.7116	1.15454e-17	2.46564e-16
21:45483666:+,21:45494920:+	TRAPPC10	novel	NONE	NONE	NONE	NONE	-0.411447	7.77258	-2.6412	17.7104	1.1567e-17	2.46975e-16
12:70672054:+,12:70729218:+	CNOT2	novel	NONE	NONE	NONE	NONE	-1.50914	8.04066	-2.5066	17.7097	1.15788e-17	2.47177e-16
14:52118714:+,14:52164860:+	FRMD6	novel	NONE	NONE	NONE	NONE	2.63454	7.86957	-2.5926	17.7091	1.1591e-17	2.47386e-16
7:107531734:+,7:107543923:+	DLD	extended	None	None	DLD.gAug10	None	0.157984	8.37313	-1.28553	17.7061	1.16466e-17	2.48425e-16
11:64537081:+,11:64537728:+	SF1	novel	NONE	NONE	NONE	NONE	-0.78482	7.95407	-2.552	17.7041	1.16836e-17	2.4911e-16
1:55544324:+,1:55546995:+	USP24	novel	NONE	NONE	NONE	NONE	0.341734	7.81055	-2.62312	17.7039	1.1687e-17	2.49133e-16
5:72185784:+,5:72188966:+	TNPO1	novel	NONE	NONE	NONE	NONE	0.527244	7.78777	-2.63297	17.6996	1.17664e-17	2.50623e-16
12:93169909:+,12:93171319:+	EEA1	novel	NONE	NONE	NONE	NONE	2.39664	7.78003	-2.63797	17.6982	1.17917e-17	2.5111e-16
14:102507010:+,14:102508350:+	DYNC1H1	novel	NONE	NONE	NONE	NONE	0.0486962	8.59492	-2.23214	17.6974	1.18068e-17	2.51275e-16
12:50484373:+,12:50492497:+	SMARCD1	novel	NONE	NONE	NONE	NONE	0.322152	7.89797	-2.57998	17.6938	1.18758e-17	2.52595e-16
2:65480998:+,2:65488381:+	ACTR2	novel	NONE	NONE	NONE	NONE	1.01786	6.26177	0.30374	17.6933	1.18853e-17	2.52715e-16
X:73814224:+,X:73815644:+	RLIM	core	NM_016120,NM_183353	ENST00000332687,ENST00000349225	RLIMandPABPC1P3.aAug10,RLIMandPABPC1P3.bAug10,RLIMandPABPC1P3.dAug10,RLIMandPABPC1P3.eAug10,RLIMandPABPC1P3.fAug10,RLIMandPABPC1P3.hAug10,RLIMandPABPC1P3.iAug10	uc004ebu.2,uc004ebw.2	2.70255	2.65315	2.22048	17.6921	1.19065e-17	2.53094e-16
1:158057650:+,1:158058117:+	KIRREL	novel	NONE	NONE	NONE	NONE	0.567402	8.03312	-2.51287	17.683	1.20792e-17	2.56505e-16
7:104783777:+,7:104786940:+	SRPK2	novel	NONE	NONE	NONE	NONE	-0.367414	7.86189	-2.59736	17.6791	1.21543e-17	2.57913e-16
12:88900914:+,12:88909311:+	KITLG	core	NM_000899	ENST00000228280,ENST00000378535	KITLG.aAug10,KITLG.cAug10	uc001tav.2	3.45509	2.92917	1.45137	17.6791	1.21553e-17	2.57913e-16
17:62498341:+,17:62499044:+	DDX5	novel	NONE	NONE	NONE	NONE	0.266772	8.09014	-2.48449	17.6785	1.21658e-17	2.58083e-16
15:66779630:+,15:66782840:+	MAP2K1,SNAPC5	novel	NONE	NONE	NONE	NONE	-0.824602	7.98738	-2.535	17.6779	1.21783e-17	2.58298e-16
15:41188277:+,15:41191105:+	VPS18	core	NM_020857	ENST00000220509,ENST00000558474	VPS18.aAug10,VPS18.cAug10	uc001zne.2	2.17116	2.65732	1.77036	17.6759	1.22171e-17	2.59068e-16
11:107959386:+,11:107965118:+	CUL5	novel	NONE	NONE	NONE	NONE	1.18674	8.0588	-2.49654	17.6745	1.22431e-17	2.59567e-16
5:111071204:+,5:111092833:+	C5orf13	extended	None	ENST00000503429,ENST00000507742	C5orf13.bAug10,C5orf13.fAug10,C5orf13.kAug10,C5orf13.vbAug10	None	0.30677	2.63356	1.68275	17.6731	1.22705e-17	2.60043e-16
4:724899:+,4:727461:+	PCGF3	core	NM_006315	ENST00000362003,ENST00000400151,ENST00000427463,ENST00000430644,ENST00000433814,ENST00000470161,ENST00000482726,ENST00000484141,ENST00000505655	PCGF3.bAug10,PCGF3.cAug10,PCGF3.fAug10,PCGF3.iAug10,PCGF3.jAug10,PCGF3.mAug10,PCGF3.tAug10	uc003gbc.1,uc003gbe.2,uc010ibh.2	1.26375	2.60349	1.81143	17.6697	1.23377e-17	2.61309e-16
1:78031469:+,1:78031766:+	ZZZ3	core	NM_015534	ENST00000370798,ENST00000370801,ENST00000476275,ENST00000481346	ZZZ3.aAug10,ZZZ3.bAug10,ZZZ3.cAug10,ZZZ3.dAug10,ZZZ3.fAug10,ZZZ3.gAug10,ZZZ3.hAug10,ZZZ3.iAug10,ZZZ3.kAug10	uc001dhp.2,uc001dhq.2,uc001dhr.2	1.33397	2.03786	2.3681	17.6672	1.2386e-17	2.62227e-16
12:120575848:+,12:120576499:+	GCN1L1	novel	NONE	NONE	NONE	NONE	-0.526732	7.91872	-2.56652	17.6578	1.25732e-17	2.65763e-16
8:90926441:+,8:90926783:+	OSGIN2	core	NM_001126111,NM_004337	ENST00000297438,ENST00000451899,ENST00000520659	OSGIN2.aAug10,OSGIN2.bAug10,OSGIN2.cAug10	uc003yeg.2,uc003yeh.2	2.01184	2.06505	2.3259	17.6569	1.25902e-17	2.66068e-16
2:189921752:+,2:189923155:+	COL5A2	novel	NONE	NONE	NONE	NONE	1.2239	7.80963	-2.62369	17.652	1.26888e-17	2.68044e-16
4:39458158:+,4:39459814:+	RPL9	novel	NONE	NONE	NONE	NONE	1.26222	8.06435	-2.49712	17.6509	1.27112e-17	2.68464e-16
2:74754186:+,2:74754863:+	AUP1	extended	None	None	AUP1.lAug10	None	-0.980871	8.4748	-1.51676	17.65	1.27281e-17	2.68766e-16
2:150061918:+,2:150069506:+	LYPD6B	novel	NONE	NONE	NONE	NONE	-0.543037	8.22652	-2.41491	17.646	1.28109e-17	2.70461e-16
22:41554504:+,22:41556646:+	EP300	core	NM_001429	ENST00000263253	EP300.aAug10	uc003azl.3	2.20621	2.13746	2.19886	17.6447	1.28376e-17	2.7097e-16
3:186502485:+,3:186503953:+	EIF4A2	extended	None	None	EIF4A2_.lAug10	None	0.725695	7.25194	0.244756	17.6433	1.28646e-17	2.71486e-16
16:67063388:+,16:67070542:+	CBFB	novel	NONE	NONE	NONE	NONE	1.26355	8.08393	-2.48698	17.6418	1.28956e-17	2.71921e-16
13:23949408:+,13:23949491:+	SACS	extended	None	ENST00000402364	SACS.bAug10	uc001uoo.2	1.71211	3.47138	1.10486	17.6396	1.29419e-17	2.72788e-16
22:41545179:+,22:41545765:+	EP300	core	NM_001429	ENST00000263253	EP300.aAug10,EP300.iAug10	uc003azl.3	2.20621	2.26153	2.08238	17.6389	1.29549e-17	2.73007e-16
13:21950794:+,13:21955573:+	ZDHHC20	core	NM_153251	ENST00000320220,ENST00000382466,ENST00000464055,ENST00000477811,ENST00000494731,ENST00000542645	ZDHHC20.aAug10,ZDHHC20.bAug10,ZDHHC20.cAug10,ZDHHC20.dAug10,ZDHHC20.fAug10,ZDHHC20.jAug10	uc001uob.2,uc001uod.2,uc001uoe.2,uc010tcs.1	1.3291	2.22666	2.3346	17.6379	1.29768e-17	2.73415e-16
4:77036647:+,4:77039228:+	NUP54	novel	NONE	NONE	NONE	NONE	-1.29117	8.00607	-2.52594	17.6356	1.30226e-17	2.7427e-16
X:41012334:+,X:41025125:+	USP9X	novel	NONE	NONE	NONE	NONE	-0.404544	7.81687	-2.61792	17.6347	1.30421e-17	2.74625e-16
7:74119550:+,7:74125363:+	GTF2I	novel	NONE	NONE	NONE	NONE	-1.21614	7.93209	-2.56054	17.6328	1.3081e-17	2.75334e-16
17:48445659:+,17:48447816:+	MRPL27	novel	NONE	NONE	NONE	NONE	-0.625567	7.86833	-2.59453	17.6288	1.31644e-17	2.76772e-16
1:108686332:+,1:108697605:+	SLC25A24	novel	NONE	NONE	NONE	NONE	0.865726	7.81653	-2.61811	17.6225	1.32965e-17	2.79335e-16
4:26426101:+,4:26426253:+	RBPJ	core	NM_005349,NM_015874,NM_203283,NM_203284	ENST00000342295,ENST00000342320,ENST00000345843,ENST00000348160,ENST00000355476,ENST00000361572,ENST00000504907,ENST00000506903,ENST00000507561,ENST00000514380	RBPJ.aAug10,RBPJ.bAug10,RBPJ.cAug10,RBPJ.dAug10,RBPJ.eAug10,RBPJ.fAug10,RBPJ.gAug10,RBPJ.hAug10,RBPJ.iAug10,RBPJ.jAug10,RBPJ.kAug10,RBPJ.lAug10,RBPJ.mAug10	uc003grx.1,uc003gry.1,uc003grz.1,uc003gsa.1,uc003gsb.1,uc003gsc.1,uc011bxt.1	1.77846	2.20133	2.4253	17.6225	1.32976e-17	2.79335e-16
1:154938257:+,1:154938638:+	SHC1	novel	NONE	NONE	NONE	NONE	0.540256	7.75542	-2.64914	17.6216	1.33171e-17	2.79687e-16
7:148903914:+,7:148904443:+	ZNF282	core	NM_003575	ENST00000262085,ENST00000430197,ENST00000462740,ENST00000479907	ZNF282.aAug10,ZNF282.bAug10,ZNF282.cAug10,ZNF282.fAug10,ZNF282.hAug10	uc003wfm.2,uc003wfn.2,uc003wfo.2,uc011kun.1	2.09846	2.10691	2.40129	17.6207	1.33352e-17	2.79957e-16
1:243388623:+,1:243418342:+	CEP170	core	NM_001042404,NM_001042405,NM_014812	ENST00000366542,ENST00000366543,ENST00000366544,ENST00000424081,ENST00000522522,ENST00000523581,ENST00000532008	CEP170.aAug10,CEP170.bAug10,CEP170.cAug10,CEP170.dAug10,CEP170.oAug10,CEP170.vdAug10	uc001hzs.2,uc001hzt.2,uc001hzu.2	1.43827	2.09117	2.26496	17.6198	1.33537e-17	2.80233e-16
2:192543854:+,2:192546672:+	OBFC2A	core	NM_001031716,NM_001254736,NR_045622,NR_045623	ENST00000307834,ENST00000307849,ENST00000409510,ENST00000410026,ENST00000425611,ENST00000435931,ENST00000451500,ENST00000462712,ENST00000491331	OBFC2A.aAug10,OBFC2A.bAug10,OBFC2A.cAug10,OBFC2A.dAug10,OBFC2A.eAug10,OBFC2A.fAug10,OBFC2A.gAug10,OBFC2A.hAug10,OBFC2A.lAug10,OBFC2A.pAug10,OBFC2A.qAug10,OBFC2A.rAug10,OBFC2A.sAug10,OBFC2A.uAug10	uc002usw.2,uc002usx.2,uc002usy.2,uc002usz.2,uc002uta.2	2.28345	2.72821	1.66161	17.6167	1.34197e-17	2.81506e-16
20:21336815:+,20:21338374:+	XRN2	novel	NONE	NONE	NONE	NONE	-0.81848	7.92467	-2.5638	17.6164	1.34264e-17	2.81591e-16
20:35858462:+,20:35862423:+	RPN2	extended	None	ENST00000397161,ENST00000437329,ENST00000470352	RPN2.gAug10,RPN2.kAug10	None	1.3164	2.56124	1.93358	17.6125	1.3511e-17	2.83252e-16
15:63551891:+,15:63555726:+	RAB8B	extended	None	ENST00000448330	RAB8B.bAug10	uc010uih.1	1.77274	7.98606	-2.53546	17.6111	1.35397e-17	2.83741e-16
1:179815963:+,1:179816670:+	TOR1AIP2	core	NM_001199260,NM_145034	ENST00000367612	TOR1AIP2.aAug10,TOR1AIP2.bAug10,TOR1AIP2.nAug10	uc001gnk.2,uc001gnl.2	2.7974	2.85707	1.53419	17.6109	1.35442e-17	2.83777e-16
3:98527018:+,3:98530312:+	DCBLD2	novel	NONE	NONE	NONE	NONE	1.72303	8.09498	-2.48183	17.6091	1.3584e-17	2.84556e-16
7:102988228:+,7:102995315:+	PSMC2,SLC26A5	novel	NONE	NONE	NONE	NONE	0.527155	8.61155	-2.22402	17.6077	1.36139e-17	2.85107e-16
20:31424647:+,20:31434424:+	MAPRE1	novel	NONE	NONE	NONE	NONE	1.1841	7.79367	-2.63012	17.6072	1.36239e-17	2.85221e-16
5:70238697:+,5:70241893:+	SMN1,SMN2	core	NM_022874,NM_022876,NM_022877	ENST00000351205,ENST00000503079,ENST00000518504	SERF1AandSMN1.cAug10,SERF1AandSMN1.dAug10	uc003kal.2,uc003kan.2	1.96317	5.78963	0.427398	17.606	1.36501e-17	2.85713e-16
9:2820098:+,9:2829774:+	KIAA0020	novel	NONE	NONE	NONE	NONE	0.494338	7.75511	-2.64984	17.6056	1.36606e-17	2.85875e-16
17:48469863:+,17:48472290:+	LRRC59	novel	NONE	NONE	NONE	NONE	0.930377	9.49603	0.309047	17.6035	1.37049e-17	2.86688e-16
16:53261376:+,16:53262895:+	CHD9	novel	NONE	NONE	NONE	NONE	1.39648	8.07679	-2.49039	17.5988	1.38081e-17	2.88733e-16
17:2541614:+,17:2569310:+	PAFAH1B1	extended	None	None	PAFAH1B1.cAug10,PAFAH1B1.dAug10,PAFAH1B1.pAug10	None	0.882041	5.15453	0.958262	17.5972	1.38428e-17	2.89343e-16
8:105511747:+,8:105521167:+	LRP12	core	NM_001135703,NM_013437	ENST00000276654,ENST00000424843,ENST00000520770,ENST00000523830	LRP12.aAug10,LRP12.bAug10	uc003yma.2,uc003ymb.2	1.79425	2.1638	2.31777	17.5959	1.38716e-17	2.89888e-16
5:56472227:+,5:56526673:+	GPBP1	core	NM_001203246	ENST00000514387	GPBP1.dAug10	uc003jri.3	0.752482	3.89951	0.967955	17.5857	1.40982e-17	2.94156e-16
12:69222711:+,12:69233054:+	MDM2	extended	None	ENST00000537182	None	None	2.96722	5.49573	0.761402	17.5848	1.41188e-17	2.94526e-16
7:127976096:+,7:127978780:+	RBM28	novel	NONE	NONE	NONE	NONE	-0.651919	7.77796	-2.63945	17.5845	1.41253e-17	2.94578e-16
3:149639014:+,3:149678527:+	RNF13	extended	None	ENST00000468289	RNF13.cAug10	None	-0.0874394	8.1386	-2.45667	17.5845	1.41269e-17	2.94578e-16
8:92083517:+,8:92090584:+	OTUD6B	novel	NONE	NONE	NONE	NONE	0.857769	8.38858	-2.33555	17.5819	1.41857e-17	2.95687e-16
7:100482991:+,7:100483484:+	SRRT	novel	NONE	NONE	NONE	NONE	1.36843	7.83069	-2.61353	17.5812	1.4201e-17	2.95949e-16
8:120807871:+,8:120809902:+	TAF2	extended	None	ENST00000523904	TAF2.cAug10	None	1.13707	7.97994	-2.00896	17.5802	1.42221e-17	2.9633e-16
17:55023872:+,17:55027250:+	COIL	novel	NONE	NONE	NONE	NONE	0.926271	7.88861	-2.58471	17.5799	1.42311e-17	2.96457e-16
2:237994685:+,2:237997248:+	COPS8	novel	NONE	NONE	NONE	NONE	0.171173	8.19215	-2.43143	17.5762	1.43145e-17	2.98046e-16
1:213061936:+,1:213062488:+	FLVCR1	core	NM_014053	ENST00000366971,ENST00000419102,ENST00000483790	FLVCR1.aAug10,FLVCR1.bAug10,FLVCR1.cAug10,FLVCR1.dAug10	uc001hjt.2	3.3528	3.38018	1.27746	17.5761	1.43158e-17	2.98046e-16
17:65353547:+,17:65362528:+	PSMD12	core	NM_174871	ENST00000357146	PSMD12.cAug10	uc002jga.2	2.49913	8.2509	-1.87519	17.5753	1.43349e-17	2.98384e-16
7:32591907:+,7:32593339:+	AVL9	core	NM_015060	ENST00000318709,ENST00000329714,ENST00000404479,ENST00000409301,ENST00000446718	AVL9.aAug10,AVL9.bAug10,AVL9.cAug10	uc003tcv.1,uc010kwj.1,uc011kai.1	1.58185	2.01066	2.37153	17.572	1.44103e-17	2.99834e-16
17:26942264:+,17:26943114:+	KIAA0100	novel	NONE	NONE	NONE	NONE	0.339485	7.75449	-2.6509	17.5711	1.44307e-17	3.002e-16
10:131973170:+,10:131977606:+	GLRX3	novel	NONE	NONE	NONE	NONE	0.0142324	7.7465	-2.65381	17.5639	1.4598e-17	3.03261e-16
10:104129532:+,10:104129931:+	GBF1	novel	NONE	NONE	NONE	NONE	-0.249569	7.80799	-2.62288	17.5629	1.46208e-17	3.03674e-16
5:131052349:+,5:131055010:+	FNIP1	novel	NONE	NONE	NONE	NONE	2.09458	7.88161	-2.58557	17.5616	1.46509e-17	3.0424e-16
1:118492753:+,1:118494599:+	WDR3	novel	NONE	NONE	NONE	NONE	0.844885	7.80039	-2.62852	17.5609	1.46675e-17	3.04523e-16
X:19362212:+,X:19368055:+	PDHA1	novel	NONE	NONE	NONE	NONE	0.358208	7.8524	-2.60271	17.551	1.4901e-17	3.09068e-16
2:187503192:+,2:187505642:+	ITGAV	core	NM_001144999,NM_001145000,NM_002210	ENST00000261023,ENST00000374907,ENST00000433736,ENST00000544640	ITGAV.aAug10,ITGAV.bAug10	uc002upq.2,uc010frs.2,uc010zfv.1	2.28123	2.16861	3.22101	17.5499	1.4926e-17	3.09403e-16
20:37199490:+,20:37203417:+	RALGAPB	novel	NONE	NONE	NONE	NONE	1.03039	7.80024	-2.62734	17.5483	1.49662e-17	3.10174e-16
12:101794951:+,12:101799622:+	ARL1	novel	NONE	NONE	NONE	NONE	-0.0952565	7.93002	-2.56409	17.5437	1.50748e-17	3.12179e-16
11:89936595:+,11:89939370:+	CHORDC1	novel	NONE	NONE	NONE	NONE	0.109203	7.77706	-2.63984	17.5421	1.51143e-17	3.12936e-16
10:27411902:+,10:27415625:+	YME1L1	novel	NONE	NONE	NONE	NONE	1.40718	7.95055	-2.5522	17.5323	1.53508e-17	3.17272e-16
20:21346342:+,20:21362632:+	XRN2	novel	NONE	NONE	NONE	NONE	-0.81848	7.75363	-2.64984	17.5287	1.54396e-17	3.19044e-16
17:3935552:+,17:3937309:+	ZZEF1	novel	NONE	NONE	NONE	NONE	1.18528	8.25361	-2.40229	17.528	1.54579e-17	3.19296e-16
1:249110861:+,1:249111021:+	SH3BP5L	core	NM_030645	ENST00000366472,ENST00000411742,ENST00000475978,ENST00000494837	SH3BP5L.aAug10,SH3BP5L.bAug10,SH3BP5L.dAug10	uc001iev.1,uc001iew.1,uc010pzq.1	1.89954	2.0325	2.29721	17.5276	1.54677e-17	3.19436e-16
22:41523752:+,22:41525894:+	EP300	core	NM_001429	ENST00000263253	EP300.aAug10,EP300.jAug10	uc003azl.3	2.20621	2.3336	2.18593	17.5273	1.54757e-17	3.19539e-16
2:128075336:+,2:128075745:+	MAP3K2	core	NM_006609	ENST00000344908,ENST00000409947	MAP3K2.aAug10,MAP3K2.bAug10	uc002toj.1	2.72744	3.05146	1.57175	17.5219	1.56096e-17	3.22177e-16
7:36450313:+,7:36455367:+	ANLN	extended	None	ENST00000452877	ANLN.fAug10,ANLN.gAug10	None	-1.10154	3.4054	1.39389	17.5208	1.56371e-17	3.22681e-16
4:26407892:+,4:26417097:+	RBPJ	core	NM_005349,NM_015874,NM_203283,NM_203284	ENST00000342295,ENST00000342320,ENST00000345843,ENST00000348160,ENST00000355476,ENST00000361572,ENST00000504907,ENST00000504938,ENST00000506956,ENST00000507561,ENST00000507574,ENST00000510778,ENST00000511451,ENST00000511546,ENST00000512351,ENST00000512671,ENST00000514380,ENST00000514675,ENST00000514730,ENST00000515573	RBPJ.aAug10,RBPJ.bAug10,RBPJ.cAug10,RBPJ.dAug10,RBPJ.eAug10,RBPJ.fAug10,RBPJ.gAug10,RBPJ.hAug10,RBPJ.iAug10,RBPJ.kAug10,RBPJ.lAug10,RBPJ.mAug10,RBPJ.nAug10,RBPJ.oAug10,RBPJ.pAug10,RBPJ.qAug10	uc003grx.1,uc003gry.1,uc003grz.1,uc003gsa.1,uc003gsb.1,uc003gsc.1,uc011bxt.1	1.77846	2.25946	2.18439	17.5205	1.56449e-17	3.22779e-16
2:112638426:+,2:112641519:+	ANAPC1	core	NM_022662	ENST00000341068,ENST00000467878,ENST00000489177	ANAPC1.aAug10,ANAPC1.cAug10,ANAPC1.fAug10,ANAPC1.gAug10	uc002thi.2,uc002thj.2	-1.2034	2.14901	2.28856	17.5202	1.56512e-17	3.22846e-16
14:73566141:+,14:73569900:+	RBM25	novel	NONE	NONE	NONE	NONE	2.1353	8.4804	-2.28882	17.5198	1.5661e-17	3.22984e-16
1:78047811:+,1:78050202:+	ZZZ3	core	NM_015534	ENST00000370798,ENST00000370801,ENST00000474746,ENST00000476195,ENST00000476275,ENST00000481346	ZZZ3.aAug10,ZZZ3.bAug10,ZZZ3.cAug10,ZZZ3.dAug10,ZZZ3.eAug10,ZZZ3.fAug10,ZZZ3.gAug10,ZZZ3.hAug10,ZZZ3.iAug10,ZZZ3.mAug10,ZZZ3.nAug10,ZZZ3.oAug10,ZZZ3.uAug10,ZZZ3.veAug10	uc001dhp.2,uc001dhq.2,uc001dhr.2	1.33397	2.46185	1.9344	17.5191	1.56791e-17	3.2323e-16
11:11971551:+,11:11974288:+	USP47	novel	NONE	NONE	NONE	NONE	0.402911	7.76901	-2.64396	17.5166	1.57416e-17	3.24392e-16
7:135107102:+,7:135122906:+	CNOT4	core	NM_001008225,NM_001190847,NM_001190848,NM_001190849,NM_001190850,NM_013316	ENST00000262563,ENST00000315544,ENST00000356162,ENST00000361528,ENST00000414802,ENST00000423368,ENST00000428680,ENST00000451834,ENST00000465721,ENST00000491203,ENST00000498534,ENST00000541284	CNOT4.aAug10,CNOT4.bAug10,CNOT4.cAug10,CNOT4.dAug10,CNOT4.eAug10,CNOT4.jAug10,CNOT4.kAug10,CNOT4.mAug10,CNOT4.nAug10	uc003vss.2,uc003vst.2,uc003vsu.1,uc003vsv.1,uc011kpy.1,uc011kpz.1	1.91536	2.30031	2.01781	17.5157	1.57645e-17	3.24801e-16
17:30687784:+,17:30689933:+	ZNF207	novel	NONE	NONE	NONE	NONE	-0.0501608	8.11217	-2.47285	17.5121	1.58552e-17	3.26285e-16
7:98652488:+,7:98655041:+	SMURF1	novel	NONE	NONE	NONE	NONE	0.926469	8.27475	-2.39175	17.5104	1.58988e-17	3.26992e-16
2:27994666:+,2:28002300:+	MRPL33	extended	None	None	MRPL33.jAug10	None	0.076906	4.88227	0.864246	17.5083	1.59524e-17	3.27901e-16
8:109226945:+,8:109229563:+	EIF3E	novel	NONE	NONE	NONE	NONE	0.753503	7.76108	-2.64802	17.5078	1.59658e-17	3.28113e-16
14:23373535:+,14:23374303:+	RBM23	novel	NONE	NONE	NONE	NONE	-0.0166161	7.90202	-2.57667	17.5071	1.59814e-17	3.2837e-16
7:86809018:+,7:86811544:+	DMTF1	novel	NONE	NONE	NONE	NONE	0.590918	7.79917	-2.62802	17.5034	1.60782e-17	3.30165e-16
12:49089589:+,12:49091921:+	CCNT1	novel	NONE	NONE	NONE	NONE	1.35092	7.73751	-2.65809	17.5023	1.61061e-17	3.30673e-16
17:5390004:+,17:5391516:+	MIS12	extended	None	None	MIS12.eAug10	None	2.09729	2.68993	1.74525	17.501	1.61382e-17	3.31267e-16
4:146044509:+,4:146046142:+	ABCE1	novel	NONE	NONE	NONE	NONE	-0.865553	7.89432	-2.57864	17.497	1.62427e-17	3.33282e-16
1:16464925:+,1:16474873:+	EPHA2	core	NM_004431	ENST00000358432	EPHA2.aAug10,EPHA2.bAug10	uc001aya.1,uc010oca.1	1.80946	2.4912	1.90272	17.4967	1.62501e-17	3.3337e-16
8:124359646:+,8:124361525:+	ATAD2	novel	NONE	NONE	NONE	NONE	-1.05414	7.81405	-2.62171	17.4963	1.62598e-17	3.33504e-16
9:35706548:+,9:35707069:+	TLN1	novel	NONE	NONE	NONE	NONE	0.385548	7.829	-2.61353	17.4944	1.63105e-17	3.34477e-16
5:150078193:+,5:150080494:+	RBM22	novel	NONE	NONE	NONE	NONE	1.19936	8.69377	-2.1836	17.4927	1.63552e-17	3.35329e-16
4:170028356:+,4:170037420:+	SH3RF1	core	NM_020870	ENST00000284637	SH3RF1.aAug10	uc003isa.1	3.15288	3.04019	1.39602	17.4908	1.64051e-17	3.36159e-16
1:172502637:+,1:172525009:+	C1orf9	novel	NONE	NONE	NONE	NONE	0.101182	7.73719	-2.65793	17.4892	1.64463e-17	3.36869e-16
12:112471183:+,12:112478285:+	NAA25	novel	NONE	NONE	NONE	NONE	1.12373	7.72929	-2.66336	17.4889	1.64543e-17	3.36966e-16
7:86823418:+,7:86824347:+	DMTF1	extended	None	ENST00000454008	DMTF1.gAug10	None	0.590918	2.5396	1.81498	17.4883	1.64713e-17	3.37185e-16
1:214816667:+,1:214822018:+	CENPF	novel	NONE	NONE	NONE	NONE	0.304069	8.11773	-2.46641	17.4844	1.65723e-17	3.38988e-16
12:112326422:+,12:112330771:+	MAPKAPK5	novel	NONE	NONE	NONE	NONE	-0.771372	8.32945	-2.36466	17.4827	1.66174e-17	3.39844e-16
11:67942650:+,11:67953248:+	SUV420H1	extended	None	ENST00000402185	SUV420H1.hAug10	uc010rqa.1	1.22523	8.46026	-0.833159	17.4821	1.66332e-17	3.40101e-16
10:90770357:+,10:90773876:+	FAS	novel	NONE	NONE	NONE	NONE	2.25982	8.35552	-2.35244	17.4769	1.67745e-17	3.42923e-16
9:93976707:+,9:93983087:+	AUH	novel	NONE	NONE	NONE	NONE	-0.368855	7.74469	-2.65461	17.4677	1.70225e-17	3.47725e-16
7:72409948:+,7:72412376:+	POM121	novel	NONE	NONE	NONE	NONE	0.183166	7.70492	-2.6755	17.4672	1.70362e-17	3.47937e-16
16:15180115:+,16:15186366:+	RRN3	novel	NONE	NONE	NONE	NONE	1.05139	8.23455	-2.41272	17.4668	1.70467e-17	3.48083e-16
13:28964241:+,13:28971097:+	FLT1	core	NM_001159920,NM_001160030,NM_002019	ENST00000282397,ENST00000450836,ENST00000541932,ENST00000544047	FLT1.aAug10,FLT1.bAug10,FLT1.cAug10,FLT1.kAug10	uc001usb.3,uc001usc.3,uc010aar.1,uc010aat.1	1.25857	2.31934	2.33163	17.4661	1.70644e-17	3.48376e-16
2:187540654:+,2:187541924:+	ITGAV	novel	NONE	NONE	NONE	NONE	2.28123	7.71272	-2.67025	17.4567	1.73249e-17	3.53216e-16
6:128643455:+,6:128841404:+	PTPRK	novel	NONE	NONE	NONE	NONE	1.17551	8.15914	-2.44797	17.4546	1.73834e-17	3.54271e-16
1:16475542:+,1:16482343:+	EPHA2	extended	None	ENST00000461614	EPHA2.cAug10	None	1.80946	5.01668	0.735694	17.4535	1.74133e-17	3.54742e-16
1:245017805:+,1:245018726:+	HNRNPU	novel	NONE	NONE	NONE	NONE	-1.68896	7.85775	-2.59911	17.4462	1.76182e-17	3.58639e-16
19:59056464:+,19:59058964:+	TRIM28	novel	NONE	NONE	NONE	NONE	-0.442017	7.82817	-2.61265	17.4456	1.76348e-17	3.58907e-16
6:76380436:+,6:76385576:+	SENP6	novel	NONE	NONE	NONE	NONE	-0.221108	7.94963	-2.55063	17.4455	1.76383e-17	3.58908e-16
16:15694410:+,16:15695848:+	KIAA0430	novel	NONE	NONE	NONE	NONE	-0.57914	7.70435	-2.67455	17.4411	1.77619e-17	3.61285e-16
11:102094483:+,11:102100433:+	YAP1	novel	NONE	NONE	NONE	NONE	0.47321	8.11804	-2.47062	17.4381	1.78481e-17	3.62826e-16
22:39709315:+,22:39710112:+	RPL3	extended	None	None	RPL3_.bAug10	None	0.934552	2.15837	2.20361	17.4311	1.80503e-17	3.66796e-16
X:53114048:+,X:53114409:+	TSPYL2	novel	NONE	NONE	NONE	NONE	-0.0631628	5.32031	0.504913	17.4283	1.81329e-17	3.68262e-16
9:37780877:+,9:37783911:+	EXOSC3	core	NM_001002269	ENST00000396521,ENST00000465229,ENST00000490516	SHBandMCART1andEXOSC3.gAug10,SHBandMCART1andEXOSC3.hAug10,SHBandMCART1andEXOSC3.vbAug10	uc004aam.2	0.446766	2.55784	1.86606	17.427	1.81689e-17	3.68921e-16
22:41556726:+,22:41558727:+	EP300	core	NM_001429	ENST00000263253	EP300.aAug10	uc003azl.3	2.20621	2.31684	2.20185	17.4268	1.81763e-17	3.6895e-16
7:73106976:+,7:73111935:+	WBSCR22	extended	None	ENST00000453316	WBSCR22.qAug10	None	0.978057	8.37542	-1.03859	17.4267	1.81773e-17	3.6895e-16
9:33467514:+,9:33468319:+	NOL6	novel	NONE	NONE	NONE	NONE	-0.530925	7.95608	-2.55146	17.4254	1.82165e-17	3.69665e-16
8:22888385:+,8:22926264:+	TNFRSF10B	core	NR_027140	ENST00000523504,ENST00000542226	TNFRSF10B.dAug10,TNFRSF10B.gAug10,TNFRSF10B.jAug10	uc011kzq.1	1.54337	5.94699	0.644624	17.4244	1.82445e-17	3.70099e-16
2:122485488:+,2:122486053:+	MKI67IP	novel	NONE	NONE	NONE	NONE	1.36384	8.40129	-2.32958	17.4235	1.82713e-17	3.70572e-16
2:201680240:+,2:201681048:+	BZW1	novel	NONE	NONE	NONE	NONE	1.35957	8.49342	-1.34518	17.4186	1.84166e-17	3.73302e-16
X:153588273:+,X:153589676:+	FLNA	novel	NONE	NONE	NONE	NONE	0.227357	7.69586	-2.679	17.418	1.84345e-17	3.7359e-16
16:58201699:+,16:58230637:+	CSNK2A2	novel	NONE	NONE	NONE	NONE	0.346015	7.97601	-2.53839	17.4152	1.85153e-17	3.74942e-16
9:75777777:+,9:75780032:+	ANXA1	novel	NONE	NONE	NONE	NONE	0.548849	9.27735	-0.655611	17.4144	1.85398e-17	3.75293e-16
4:41263817:+,4:41266120:+	UCHL1	novel	NONE	NONE	NONE	NONE	0.541156	8.17758	-2.44065	17.4139	1.8554e-17	3.75508e-16
2:128066338:+,2:128072330:+	MAP3K2	core	NM_006609	ENST00000344908,ENST00000409947	MAP3K2.aAug10,MAP3K2.bAug10	uc002toj.1	2.72744	3.23475	1.40753	17.4095	1.86856e-17	3.78024e-16
2:135704035:+,2:135705306:+	CCNT2	extended	None	ENST00000419781	CCNT2.cAug10,CCNT2.gAug10	uc002tud.1	0.984849	2.3826	2.08586	17.4039	1.8856e-17	3.80962e-16
5:126853468:+,5:126862310:+	PRRC1	novel	NONE	NONE	NONE	NONE	1.59029	8.01541	-2.52209	17.3923	1.921e-17	3.87666e-16
2:187368941:+,2:187370467:+	ZC3H15	novel	NONE	NONE	NONE	NONE	1.10345	7.7273	-2.66288	17.3907	1.9261e-17	3.88472e-16
1:24987290:+,1:24989151:+	SRRM1	novel	NONE	NONE	NONE	NONE	2.73355	7.79698	-2.62945	17.3896	1.92944e-17	3.89009e-16
16:18809366:+,16:18812753:+	ARL6IP1	novel	NONE	NONE	NONE	NONE	-0.852177	7.70329	-2.67672	17.3864	1.93927e-17	3.90753e-16
7:17362231:+,7:17367383:+	AHR	core	NM_001621	ENST00000242057,ENST00000463496	AHR.aAug10,AHR.bAug10,AHR.cAug10	uc003stt.3,uc011jxz.1	2.56517	2.65363	2.20825	17.3837	1.94762e-17	3.92361e-16
5:143545168:+,5:143550099:+	YIPF5	extended	None	ENST00000519064	YIPF5.cAug10	None	1.60564	8.85298	-0.339132	17.3823	1.95228e-17	3.93076e-16
12:6643735:+,12:6645660:+	GAPDH	novel	NONE	NONE	NONE	NONE	0.857798	7.65406	-2.7006	17.3813	1.95539e-17	3.93626e-16
14:58711659:+,14:58714356:+	PSMA3	novel	NONE	NONE	NONE	NONE	0.543863	7.67063	-2.69288	17.3809	1.95668e-17	3.93809e-16
6:41051931:+,6:41057318:+	NFYA	core	NM_002505,NM_021705	ENST00000341376,ENST00000353205	NFYA.bAug10,NFYA.cAug10,NFYA.dAug10,NFYA.iAug10,NFYA.lAug10	uc003opo.2,uc003opp.2,uc003opq.2	2.62712	2.13827	2.22264	17.3732	1.98103e-17	3.98406e-16
8:103289420:+,8:103291264:+	UBR5	novel	NONE	NONE	NONE	NONE	0.525069	7.72704	-2.66447	17.372	1.98478e-17	3.98931e-16
16:11792181:+,16:11829873:+	TXNDC11	novel	NONE	NONE	NONE	NONE	-0.679264	7.85583	-2.60123	17.3711	1.98776e-17	3.99454e-16
1:161070649:+,1:161072077:+	PFDN2	novel	NONE	NONE	NONE	NONE	0.345422	8.07842	-2.49067	17.3707	1.98891e-17	3.99609e-16
16:15110070:+,16:15111178:+	PDXDC1	novel	NONE	NONE	NONE	NONE	-0.815889	7.67039	-2.69298	17.37	1.99121e-17	3.99994e-16
8:90785056:+,8:90792303:+	RIPK2	core	NM_003821	ENST00000220751,ENST00000522965,ENST00000540020	RIPK2.aAug10,RIPK2.bAug10	uc003yee.2,uc003yef.2	1.88115	2.1469	2.32212	17.3674	1.99947e-17	4.01423e-16
3:130399565:+,3:130403094:+	PIK3R4	novel	NONE	NONE	NONE	NONE	1.19135	8.01456	-2.52255	17.3653	2.00619e-17	4.02542e-16
20:36488438:+,20:36500327:+	CTNNBL1	novel	NONE	NONE	NONE	NONE	-0.188095	7.96763	-2.54566	17.3649	2.0077e-17	4.02768e-16
13:37580162:+,13:37581112:+	EXOSC8	novel	NONE	NONE	NONE	NONE	-1.04206	8.23857	-2.41009	17.3635	2.01197e-17	4.03472e-16
X:153660805:+,X:153663620:+	ATP6AP1	novel	NONE	NONE	NONE	NONE	0.676947	7.73485	-2.6613	17.3621	2.01649e-17	4.04302e-16
6:133135921:+,6:133137600:+	RPS12	extended	None	None	RPS12_.cAug10	None	1.11636	2.81818	1.65302	17.3617	2.01775e-17	4.04464e-16
16:3716119:+,16:3724340:+	TRAP1	novel	NONE	NONE	NONE	NONE	-0.210287	7.81151	-2.62046	17.3614	2.01878e-17	4.04528e-16
2:231281043:+,2:231327150:+	SP100	novel	NONE	NONE	NONE	NONE	-1.0961	7.83412	-2.60983	17.3586	2.02813e-17	4.06248e-16
7:151168691:+,7:151181823:+	RHEB	novel	NONE	NONE	NONE	NONE	0.822918	8.69695	-1.24394	17.3583	2.02914e-17	4.06373e-16
13:41897326:+,13:41899834:+	NAA16	core	NM_001110798,NM_018527,NM_024561	ENST00000379367,ENST00000379406,ENST00000403412,ENST00000464857,ENST00000476980	NAA16.aAug10,NAA16.bAug10,NAA16.cAug10,NAA16.dAug10,NAA16.eAug10,NAA16.fAug10	uc001uyd.3,uc001uye.3,uc001uyf.2,uc010tfg.1	1.4621	2.63623	1.92154	17.3576	2.03143e-17	4.06754e-16
13:79939868:+,13:79940190:+	RBM26	extended	None	None	RBM26.aAug10,RBM26.fAug10	uc001vkz.2	2.32617	3.37932	1.1523	17.3568	2.03375e-17	4.07021e-16
4:122604632:+,4:122607443:+	ANXA5	extended	None	ENST00000513523,ENST00000513728	ANXA5.pAug10	None	0.32136	4.56391	0.733714	17.3566	2.03453e-17	4.07021e-16
11:67934645:+,11:67938482:+	SUV420H1	core	NM_016028,NM_017635	ENST00000304363,ENST00000401547,ENST00000402185,ENST00000402789,ENST00000405515,ENST00000427752,ENST00000441488	SUV420H1.aAug10,SUV420H1.bAug10,SUV420H1.cAug10,SUV420H1.dAug10,SUV420H1.eAug10,SUV420H1.fAug10,SUV420H1.gAug10,SUV420H1.hAug10,SUV420H1.iAug10	uc001onm.1,uc001onn.1,uc001ono.1,uc001onp.2,uc001onq.2,uc009yse.1,uc009ysf.2,uc010rqa.1	1.22523	2.02832	2.38316	17.3565	2.03503e-17	4.07021e-16
3:98538261:+,3:98541072:+	DCBLD2	novel	NONE	NONE	NONE	NONE	1.72303	7.75043	-2.6536	17.355	2.03993e-17	4.07912e-16
11:59417083:+,11:59419017:+	PATL1	novel	NONE	NONE	NONE	NONE	0.686435	7.93379	-2.55851	17.3548	2.04048e-17	4.07945e-16
8:22459825:+,8:22460708:+	C8orf58	core	NM_001198827	None	PDLIM2andC8orf58andKIAA1967.nAug10	uc003xcf.2	0.329124	3.10798	1.38147	17.3536	2.04426e-17	4.08546e-16
11:119077322:+,11:119142445:+	CBL	novel	NONE	NONE	NONE	NONE	0.0157597	7.67829	-2.68917	17.3517	2.05053e-17	4.0972e-16
3:140682069:+,3:140692558:+	SLC25A36	novel	NONE	NONE	NONE	NONE	0.803693	7.79632	-2.62868	17.3511	2.05263e-17	4.10062e-16
1:183871734:+,1:183873984:+	RGL1	core	NM_015149	ENST00000304685,ENST00000360851,ENST00000367531,ENST00000536277,ENST00000539189,ENST00000543395	RGL1.aAug10,RGL1.bAug10,RGL1.cAug10,RGL1.dAug10,RGL1.eAug10,RGL1.fAug10,RGL1.gAug10,RGL1.lAug10	uc001gqm.2,uc001gqo.2,uc010pof.1,uc010pog.1,uc010poh.1,uc010poi.1	2.33894	2.58602	1.86232	17.3505	2.0547e-17	4.10399e-16
20:60712005:+,20:60714131:+	PSMA7	novel	NONE	NONE	NONE	NONE	0.548333	7.76552	-2.64602	17.3488	2.06024e-17	4.11271e-16
6:41051931:+,6:41057943:+	NFYA	novel	NONE	NONE	NONE	NONE	2.62712	7.89195	-2.58312	17.343	2.07946e-17	4.1495e-16
13:53233384:+,13:53237231:+	SUGT1	novel	NONE	NONE	NONE	NONE	-0.111145	7.70245	-2.67559	17.3428	2.0804e-17	4.15059e-16
16:28844675:+,16:28845386:+	ATXN2L	novel	NONE	NONE	NONE	NONE	-0.568755	7.82609	-2.61553	17.342	2.08279e-17	4.15456e-16
10:98312816:+,10:98321735:+	TM9SF3	extended	None	None	TM9SF3.eAug10	None	1.2283	7.97838	-0.32894	17.3409	2.0867e-17	4.16158e-16
13:29005447:+,13:29007956:+	FLT1	core	NM_001159920,NM_001160030,NM_001160031,NM_002019	ENST00000282397,ENST00000539099,ENST00000541932	FLT1.aAug10,FLT1.bAug10,FLT1.cAug10,FLT1.dAug10,FLT1.mAug10	uc001usb.3,uc001usc.3,uc010aar.1,uc010tdp.1	1.25857	2.16572	2.22696	17.3385	2.09485e-17	4.17703e-16
2:178081668:+,2:178083765:+	HNRNPA3	extended	None	ENST00000432457	HNRNPA3.kAug10	None	0.879595	3.21319	1.42613	17.3373	2.09863e-17	4.18347e-16
14:74754589:+,14:74756994:+	ABCD4	novel	NONE	NONE	NONE	NONE	-1.44446	7.69418	-2.67953	17.3373	2.09887e-17	4.18347e-16
1:226183084:+,1:226186894:+	C1orf55	core	NM_152608	ENST00000272091,ENST00000366817,ENST00000366818	C1orf55.aAug10,C1orf55.bAug10	uc001hpu.3,uc001hpv.2	2.4739	2.39919	2.20294	17.3349	2.10706e-17	4.1982e-16
7:2412430:+,7:2415024:+	EIF3B	novel	NONE	NONE	NONE	NONE	-0.71579	7.67785	-2.68835	17.3343	2.10894e-17	4.20116e-16
22:29750860:+,22:29754715:+	AP1B1	novel	NONE	NONE	NONE	NONE	0.259733	7.70223	-2.67675	17.334	2.11004e-17	4.20175e-16
6:90562953:+,6:90565189:+	CASP8AP2	novel	NONE	NONE	NONE	NONE	0.965915	8.44832	-2.30503	17.3325	2.11513e-17	4.21029e-16
4:109541756:+,4:109543261:+	RPL34	extended	None	None	RPL34.iAug10,RPL34.jAug10	None	1.09627	7.26325	0.151319	17.3309	2.12062e-17	4.21962e-16
5:179251323:+,5:179260032:+	SQSTM1	novel	NONE	NONE	NONE	NONE	-0.0079598	7.69405	-2.67936	17.3306	2.12148e-17	4.2201e-16
20:2636188:+,20:2637047:+	NOP56	novel	NONE	NONE	NONE	NONE	-0.277341	7.7263	-2.66431	17.3306	2.12166e-17	4.2201e-16
20:37063269:+,20:37063840:+	LOC388796	core	NR_015366	ENST00000414142,ENST00000417578,ENST00000436764	SNORA71AandSNORA71B.dAug10,SNORA71AandSNORA71B.jAug10,SNORA71AandSNORA71B.kAug10,SNORA71AandSNORA71B.lAug10,SNORA71AandSNORA71B.mAug10,SNORA71AandSNORA71B.pAug10,SNORA71AandSNORA71B.qAug10,SNORA71AandSNORA71B.rAug10,SNORA71AandSNORA71B.sAug10,SNORA71AandSNORA71B.uAug10,SNORA71AandSNORA71B.vaAug10,SNORA71AandSNORA71B.vbAug10,SNORA71AandSNORA71B.veAug10,SNORA71AandSNORA71B.vfAug10,SNORA71AandSNORA7…	uc002xig.3,uc002xih.3,uc002xii.3,uc002xij.3	2.27759	2.12565	2.81149	17.3248	2.14162e-17	4.25739e-16
1:229424590:+,1:229433229:+	RAB4A	novel	NONE	NONE	NONE	NONE	0.691708	7.70196	-2.67542	17.3235	2.14582e-17	4.26458e-16
5:125944176:+,5:125960267:+	PHAX	novel	NONE	NONE	NONE	NONE	1.7755	7.98767	-2.53256	17.3235	2.14605e-17	4.26458e-16
5:157221980:+,5:157232874:+	CLINT1	novel	NONE	NONE	NONE	NONE	0.22306	8.20538	-2.42719	17.3222	2.15045e-17	4.27251e-16
15:56122197:+,15:56125206:+	NEDD4	novel	NONE	NONE	NONE	NONE	-0.595458	7.62763	-2.71347	17.3204	2.15663e-17	4.28318e-16
7:45776509:+,7:45786814:+	SEPT7P2	novel	NONE	NONE	NONE	NONE	0.635182	7.64435	-2.70464	17.3143	2.17797e-17	4.3223e-16
13:94197674:+,13:94482407:+	GPC6	core	NM_005708	ENST00000377047	GPC6.aAug10,GPC6.bAug10,GPC6.cAug10	uc001vlt.2,uc001vlu.1,uc010tig.1	1.86468	2.06229	3.12664	17.3102	2.19247e-17	4.34944e-16
10:18961634:+,10:18962913:+	ARL5B	core	NM_178815	ENST00000377275	ARL5B.aAug10,ARL5B.bAug10	uc001iqd.1	2.42149	2.28609	2.30355	17.3089	2.19691e-17	4.35743e-16
19:806556:+,19:808360:+	PTBP1	extended	None	None	PTBP1.hAug10	uc002lpt.2	-0.17614	3.67225	1.24638	17.2981	2.23554e-17	4.42601e-16
3:30691952:+,3:30713130:+	TGFBR2	core	NM_001024847,NM_003242	ENST00000295754,ENST00000359013,ENST00000439925	TGFBR2.aAug10,TGFBR2.bAug10,TGFBR2.cAug10	uc003cen.2,uc003ceo.2	2.20714	2.32361	2.11042	17.2964	2.24192e-17	4.43749e-16
1:33480195:+,1:33487194:+	AK2	extended	None	ENST00000466029,ENST00000480134	AK2.jAug10,AK2.kAug10,AK2.lAug10,AK2.qAug10	None	0.538996	5.21116	1.10866	17.2916	2.25939e-17	4.47039e-16
2:27260570:+,2:27261570:+	TMEM214	novel	NONE	NONE	NONE	NONE	-0.723094	4.10206	0.900105	17.2858	2.28039e-17	4.5077e-16
7:143557540:+,7:143559895:+	FAM115A	novel	NONE	NONE	NONE	NONE	-0.453182	7.69321	-2.67965	17.2841	2.28675e-17	4.51793e-16
X:100878266:+,X:100878776:+	ARMCX3	core	NM_016607	ENST00000341189	ARMCX3.cAug10	uc004ehz.1	0.900408	2.04091	2.7425	17.283	2.29105e-17	4.52536e-16
20:32678408:+,20:32684463:+	EIF2S2	extended	None	None	EIF2S2.cAug10,EIF2S2.dAug10	None	-0.568232	2.78883	1.80733	17.2807	2.29928e-17	4.54078e-16
2:231624830:+,2:231655587:+	CAB39	core	NM_001130849,NM_001130850,NM_016289	ENST00000258418,ENST00000409788,ENST00000410084	CAB39.aAug10,CAB39.bAug10,CAB39.cAug10,CAB39.dAug10	uc002vqx.2,uc010fxq.2,uc010fxr.2	2.21845	2.1475	2.3054	17.2794	2.30415e-17	4.54954e-16
3:186501428:+,3:186502218:+	EIF4A2	extended	None	ENST00000356531,ENST00000440191,ENST00000443963,ENST00000465267,ENST00000486805,ENST00000491473	EIF4A2_.aAug10,EIF4A2_.hAug10,EIF4A2_.jAug10,EIF4A2_.lAug10,EIF4A2_.nAug10,EIF4A2_.pAug10,EIF4A2_.qAug10,EIF4A2_.uAug10,EIF4A2_.vaAug10,EIF4A2_.vdAug10,EIF4A2_.vgAug10,EIF4A2_.vkAug10,EIF4A2_.vpAug10,EIF4A2_.vrAug10	uc003fqu.2,uc003fqw.2	0.725695	2.1707	2.37667	17.2779	2.3097e-17	4.55928e-16
17:30791596:+,17:30800819:+	PSMD11	novel	NONE	NONE	NONE	NONE	0.219338	7.83211	-2.61199	17.277	2.31308e-17	4.56374e-16
7:105205904:+,7:105207566:+	EFCAB10,RINT1	novel	NONE	NONE	NONE	NONE	-0.0691068	7.9538	-2.54857	17.2766	2.31464e-17	4.56512e-16
11:59405884:+,11:59410353:+	PATL1	novel	NONE	NONE	NONE	NONE	0.686435	7.63511	-2.70961	17.2733	2.327e-17	4.58862e-16
4:144435254:+,4:144442582:+	SMARCA5	novel	NONE	NONE	NONE	NONE	0.768248	7.75644	-2.6502	17.2694	2.34184e-17	4.61616e-16
14:52458159:+,14:52471080:+	C14orf166	novel	NONE	NONE	NONE	NONE	-0.0579158	8.88901	-1.14834	17.2686	2.34487e-17	4.62127e-16
X:10450668:+,X:10534928:+	MID1	novel	NONE	NONE	NONE	NONE	1.05715	7.64337	-2.7056	17.268	2.34701e-17	4.62462e-16
1:157095771:+,1:157105263:+	ETV3	novel	NONE	NONE	NONE	NONE	2.08929	8.67699	-2.18937	17.2675	2.34893e-17	4.62754e-16
19:34936026:+,19:34942886:+	UBA2	novel	NONE	NONE	NONE	NONE	-1.96334	8.02581	-2.51563	17.2641	2.36183e-17	4.6512e-16
16:240134:+,16:242926:+	LUC7L	novel	NONE	NONE	NONE	NONE	-0.277237	7.80186	-2.62819	17.2626	2.36774e-17	4.66111e-16
19:18967109:+,19:18971130:+	UPF1	novel	NONE	NONE	NONE	NONE	0.197798	7.95212	-2.55162	17.2586	2.38302e-17	4.68943e-16
16:55522628:+,16:55527070:+	MMP2	novel	NONE	NONE	NONE	NONE	1.50152	8.12553	-2.46496	17.2581	2.38503e-17	4.69082e-16
10:51069709:+,10:51087719:+	PARG	novel	NONE	NONE	NONE	NONE	0.335344	7.92481	-2.56302	17.2581	2.38506e-17	4.69082e-16
7:45039962:+,7:45113059:+	CCM2	novel	NONE	NONE	NONE	NONE	-1.32399	7.77168	-2.64267	17.2574	2.38766e-17	4.69427e-16
14:102816385:+,14:102822105:+	CINP	core	NM_001177611,NM_032630	ENST00000216756,ENST00000536961,ENST00000559504,ENST00000559514	CINP.aAug10,CINP.bAug10,CINP.cAug10	uc001ylu.1,uc001ylv.1	2.29731	2.26685	1.94133	17.2556	2.39468e-17	4.70445e-16
1:103444469:+,1:103444938:+	COL11A1	novel	NONE	NONE	NONE	NONE	0.866023	7.80195	-2.6274	17.2526	2.40626e-17	4.72455e-16
6:75801241:+,6:75806969:+	COL12A1	novel	NONE	NONE	NONE	NONE	1.04402	7.75605	-2.64778	17.2504	2.41493e-17	4.73892e-16
12:109046193:+,12:109094900:+	CORO1C	novel	NONE	NONE	NONE	NONE	0.760594	7.70069	-2.67734	17.2497	2.4176e-17	4.74241e-16
7:134613651:+,7:134625843:+	CALD1	novel	NONE	NONE	NONE	NONE	0.242078	7.6346	-2.70974	17.2491	2.4201e-17	4.74641e-16
1:214549780:+,1:214556654:+	PTPN14	novel	NONE	NONE	NONE	NONE	1.66742	7.62609	-2.71519	17.2447	2.4372e-17	4.77906e-16
12:56361953:+,12:56364828:+	CDK2	novel	NONE	NONE	NONE	NONE	-1.23605	8.24336	-2.40761	17.2395	2.45768e-17	4.81445e-16
1:43830131:+,1:43831235:+	ELOVL1	novel	NONE	NONE	NONE	NONE	-1.7735	7.60031	-2.72762	17.2384	2.46226e-17	4.82191e-16
4:114823021:+,4:114823064:+	ARSJ	extended	None	None	ARSJ.aAug10,ARSJ.cAug10,ARSJ.dAug10	None	3.33927	2.18313	2.1458	17.2338	2.48057e-17	4.85145e-16
1:78045313:+,1:78046683:+	ZZZ3	core	NM_015534	ENST00000370798,ENST00000370801,ENST00000481346	ZZZ3.aAug10,ZZZ3.bAug10,ZZZ3.cAug10,ZZZ3.fAug10,ZZZ3.gAug10,ZZZ3.hAug10,ZZZ3.iAug10,ZZZ3.mAug10,ZZZ3.nAug10	uc001dhp.2,uc001dhq.2,uc001dhr.2	1.33397	2.02973	2.41628	17.231	2.49199e-17	4.87101e-16
3:73046222:+,3:73047228:+	PPP4R2	core	NM_174907	ENST00000295862,ENST00000356692,ENST00000394284,ENST00000470976,ENST00000482242,ENST00000488810,ENST00000495566	GXYLT2andPPP4R2andEBLN2.bAug10,GXYLT2andPPP4R2andEBLN2.cAug10,GXYLT2andPPP4R2andEBLN2.gAug10,GXYLT2andPPP4R2andEBLN2.hAug10,GXYLT2andPPP4R2andEBLN2.iAug10,GXYLT2andPPP4R2andEBLN2.lAug10,GXYLT2andPPP4R2andEBLN2.nAug10	uc003dph.1,uc003dpi.1	0.771971	2.24831	2.32234	17.2309	2.49242e-17	4.87101e-16
7:107395936:+,7:107398588:+	CBLL1	core	NM_024814,NR_024199	ENST00000222597,ENST00000417616,ENST00000420796,ENST00000432748,ENST00000440859,ENST00000535365	CBLL1.aAug10,CBLL1.bAug10,CBLL1.cAug10,CBLL1.dAug10,CBLL1.kAug10	uc003veq.2,uc011kme.1,uc011kmf.1	2.02235	2.02751	2.2981	17.2307	2.49317e-17	4.87157e-16
22:41526007:+,22:41527392:+	EP300	core	NM_001429	ENST00000263253	EP300.aAug10	uc003azl.3	2.20621	2.17706	2.20429	17.2297	2.4969e-17	4.87704e-16
12:59279684:+,12:59281571:+	LRIG3	novel	NONE	NONE	NONE	NONE	2.08927	7.68375	-2.68441	17.2268	2.50864e-17	4.89816e-16
7:130137076:+,7:130137980:+	MEST	novel	NONE	NONE	NONE	NONE	0.496185	7.93193	-2.56335	17.2253	2.51498e-17	4.9078e-16
5:142678377:+,5:142680050:+	NR3C1	core	NM_000176,NM_001018074,NM_001018075,NM_001018076,NM_001018077,NM_001020825,NM_001024094,NM_001204258,NM_001204259,NM_001204260,NM_001204261,NM_001204262,NM_001204263,NM_001204264,NM_001204265	ENST00000231509,ENST00000343796,ENST00000394464,ENST00000394466,ENST00000415690,ENST00000416954,ENST00000424646,ENST00000503201,ENST00000504572	NR3C1.aAug10,NR3C1.bAug10,NR3C1.cAug10,NR3C1.dAug10,NR3C1.eAug10,NR3C1.fAug10,NR3C1.gAug10,NR3C1.hAug10,NR3C1.iAug10,NR3C1.jAug10	uc003lmy.2,uc003lmz.2,uc003lna.2,uc003lnb.2,uc003lnc.2,uc003lnd.2,uc003lne.2,uc003lnf.2,uc011dbk.1	2.38617	2.40668	1.87628	17.2219	2.52882e-17	4.93389e-16
5:65319192:+,5:65321308:+	ERBB2IP	novel	NONE	NONE	NONE	NONE	0.629848	7.7706	-2.64365	17.2213	2.53138e-17	4.93798e-16
2:26477186:+,2:26486248:+	HADHB	novel	NONE	NONE	NONE	NONE	0.498726	7.67559	-2.69023	17.2193	2.53939e-17	4.95267e-16
7:102960125:+,7:102962379:+	DNAJC2	novel	NONE	NONE	NONE	NONE	0.154209	7.99196	-2.53397	17.2191	2.54045e-17	4.95383e-16
5:72875200:+,5:72875702:+	UTP15	core	NM_032175	ENST00000296792,ENST00000508491,ENST00000509005,ENST00000543251	UTP15.aAug10,UTP15.bAug10,UTP15.cAug10,UTP15.dAug10,UTP15.eAug10	uc003kcw.1,uc010ize.1,uc011cso.1,uc011csp.1	2.33587	2.1421	2.08992	17.214	2.56132e-17	4.99176e-16
7:100479034:+,7:100479674:+	SRRT	novel	NONE	NONE	NONE	NONE	1.36843	7.7706	-2.64165	17.2133	2.56426e-17	4.99655e-16
2:187360061:+,2:187366000:+	ZC3H15	novel	NONE	NONE	NONE	NONE	1.10345	7.59977	-2.72811	17.213	2.56561e-17	4.99825e-16
10:121341735:+,10:121347664:+	TIAL1	novel	NONE	NONE	NONE	NONE	1.23165	7.59108	-2.73162	17.212	2.56984e-17	5.00464e-16
12:27832994:+,12:27835320:+	PPFIBP1	novel	NONE	NONE	NONE	NONE	-0.213404	7.61686	-2.71965	17.2117	2.57116e-17	5.00629e-16
5:179994242:+,5:179994849:+	CNOT6	core	NM_015455	ENST00000261951,ENST00000393356,ENST00000504343	CNOT6.aAug10,CNOT6.bAug10,CNOT6.cAug10,CNOT6.eAug10	uc003mlx.2,uc010jld.2,uc010jle.2	1.36129	2.02693	2.3843	17.2095	2.58032e-17	5.02135e-16
3:184045492:+,3:184046419:+	EIF4G1	novel	NONE	NONE	NONE	NONE	-0.13422	7.68344	-2.68711	17.2087	2.58344e-17	5.02649e-16
3:87027952:+,3:87039768:+	VGLL3	core	NM_016206	ENST00000383698,ENST00000398399	VGLL3.aAug10,VGLL3.bAug10	uc003dqn.2	2.25749	2.39169	2.11652	17.2044	2.60166e-17	5.0597e-16
4:48381865:+,4:48385664:+	SLAIN2	novel	NONE	NONE	NONE	NONE	1.94744	7.64203	-2.70615	17.2043	2.60195e-17	5.0597e-16
2:191851673:+,2:191854341:+	STAT1	novel	NONE	NONE	NONE	NONE	-0.0707502	8.25838	-2.39551	17.2012	2.6153e-17	5.0847e-16
22:41543950:+,22:41545042:+	EP300	core	NM_001429	ENST00000263253	EP300.aAug10,EP300.dAug10	uc003azl.3	2.20621	2.34004	2.18166	17.1958	2.63801e-17	5.12696e-16
7:141438210:+,7:141441969:+	SSBP1	novel	NONE	NONE	NONE	NONE	0.822413	7.16124	0.155157	17.1939	2.64628e-17	5.14114e-16
8:20067950:+,8:20068688:+	ATP6V1B2	novel	NONE	NONE	NONE	NONE	-0.0743293	8.04403	-2.50674	17.1932	2.64941e-17	5.14627e-16
1:183514447:+,1:183518899:+	SMG7	novel	NONE	NONE	NONE	NONE	1.22122	7.74704	-2.65304	17.1924	2.65253e-17	5.15138e-16
3:184046544:+,3:184049054:+	EIF4G1	novel	NONE	NONE	NONE	NONE	-0.13422	8.0953	-2.48233	17.1914	2.65692e-17	5.158e-16
16:28842111:+,16:28843526:+	ATXN2L	novel	NONE	NONE	NONE	NONE	-0.568755	7.59064	-2.73197	17.1907	2.66016e-17	5.16334e-16
5:172421825:+,5:172461402:+	ATP6V0E1	extended	None	ENST00000519911	ATP6V0E1andSNORA74B.dAug10	None	1.05814	3.98393	1.15214	17.1885	2.66946e-17	5.17743e-16
3:194167844:+,3:194168581:+	ATP13A3	core	NM_024524	ENST00000256031,ENST00000310773,ENST00000439040,ENST00000485194	ATP13A3.aAug10,ATP13A3.cAug10	uc003fty.3,uc003ftz.1	1.71466	2.0141	3.46941	17.1884	2.66988e-17	5.17743e-16
11:46722649:+,11:46722949:+	ZNF408	core	NM_024741	ENST00000311764,ENST00000526410,ENST00000531866	ZNF408.aAug10,ZNF408.dAug10,ZNF408.eAug10	uc001nde.1	2.37334	2.57958	1.71306	17.1874	2.67418e-17	5.18482e-16
8:109252304:+,8:109260842:+	EIF3E	extended	None	ENST00000519030	EIF3E.dAug10	uc003ymv.2	0.753503	6.03135	0.371561	17.186	2.68041e-17	5.19593e-16
4:122735202:+,4:122737927:+	CCNA2,EXOSC9	extended	None	None	EXOSC9.eAug10	None	-1.60172	8.57741	-0.557176	17.1837	2.69043e-17	5.21441e-16
12:116429762:+,12:116434281:+	MED13L	core	NM_015335	ENST00000281928	MED13L.aAug10	uc001tvw.2	1.76045	2.34693	1.88499	17.1817	2.69925e-17	5.22861e-16
5:72863259:+,5:72864060:+	UTP15	core	NM_032175	ENST00000296792,ENST00000513824	UTP15.aAug10,UTP15.gAug10,UTP15.iAug10	uc003kcw.1,uc010ize.1	2.33587	2.43203	1.93046	17.1794	2.70912e-17	5.24579e-16
3:30648469:+,3:30686239:+	TGFBR2	core	NM_003242	ENST00000295754	TGFBR2.bAug10	uc003ceo.2	2.20714	2.60783	1.66931	17.1778	2.71622e-17	5.25857e-16
7:44839079:+,7:44840886:+	PPIA	extended	None	None	PPIA.pAug10	None	0.796549	3.44781	1.14758	17.1755	2.7264e-17	5.27731e-16
5:69361911:+,5:69363121:+	SMN1,SMN2	extended	None	ENST00000511812	SERF1BandSMN2.hAug10	uc011crm.1	1.96317	5.81727	0.62854	17.1751	2.72835e-17	5.28012e-16
19:15375577:+,19:15376165:+	BRD4	core	NM_014299,NM_058243	ENST00000263377,ENST00000360016,ENST00000371835	BRD4.aAug10,BRD4.bAug10,BRD4.cAug10,BRD4.dAug10	uc002nar.2,uc002nas.2,uc002nat.3,uc002nau.3	1.37067	2.00155	2.36005	17.1716	2.74365e-17	5.30776e-16
2:32093561:+,2:32168371:+	MEMO1	novel	NONE	NONE	NONE	NONE	-0.298299	7.95705	-2.55123	17.169	2.75526e-17	5.32728e-16
12:131285835:+,12:131297502:+	STX2	novel	NONE	NONE	NONE	NONE	-0.270315	7.96473	-2.54382	17.1656	2.7708e-17	5.35438e-16
X:48434807:+,X:48435414:+	RBM3	novel	NONE	NONE	NONE	NONE	0.972646	7.90986	-2.57452	17.1603	2.79452e-17	5.39627e-16
4:170037781:+,4:170038674:+	SH3RF1	core	NM_020870	ENST00000284637,ENST00000508685,ENST00000511421	SH3RF1.aAug10,SH3RF1.bAug10	uc003isa.1,uc010irc.1	3.15288	3.26012	1.65465	17.1598	2.7968e-17	5.39967e-16
7:66019824:+,7:66038372:+	LOC493754	extended	None	ENST00000445080	LOC493754.bAug10,LOC493754.eAug10,LOC493754.fAug10,LOC493754.gAug10,LOC493754.mAug10,LOC493754.qAug10	uc010lac.1,uc011kdx.1,uc011kec.1	-2.65645	2.25496	2.03958	17.1541	2.82283e-17	5.44593e-16
2:216232750:+,2:216236632:+	FN1	extended	None	ENST00000357009	FN1.tAug10	uc010fvb.1	1.9726	4.99302	0.765955	17.1537	2.8248e-17	5.44874e-16
13:53227093:+,13:53231667:+	SUGT1	novel	NONE	NONE	NONE	NONE	-0.111145	5.94216	0.535027	17.1499	2.84203e-17	5.47996e-16
8:87473549:+,8:87479023:+	WWP1	novel	NONE	NONE	NONE	NONE	0.412555	7.5634	-2.74558	17.1442	2.86866e-17	5.52827e-16
11:73571054:+,11:73575341:+	MRPL48	novel	NONE	NONE	NONE	NONE	0.723886	7.63217	-2.71244	17.1365	2.90489e-17	5.59092e-16
7:6737442:+,7:6746063:+	ZNF12	novel	NONE	NONE	NONE	NONE	0.706521	7.67357	-2.69087	17.1316	2.92819e-17	5.63474e-16
2:189854175:+,2:189855033:+	COL3A1	novel	NONE	NONE	NONE	NONE	1.02139	6.25659	0.490772	17.1263	2.95329e-17	5.67991e-16
7:148494951:+,7:148495664:+	CUL1	extended	None	ENST00000543583	CUL1.eAug10	None	-0.791642	7.90586	-2.0471	17.1259	2.95531e-17	5.68276e-16
15:63548793:+,15:63551826:+	RAB8B	core	NM_016530	ENST00000321437,ENST00000448330,ENST00000558119,ENST00000559006,ENST00000559927	RAB8B.aAug10,RAB8B.bAug10,RAB8B.cAug10,RAB8B.dAug10,RAB8B.eAug10,RAB8B.hAug10	uc002alz.2,uc010uih.1	1.77274	2.05147	2.7248	17.1224	2.9721e-17	5.71296e-16
12:6440092:+,12:6442533:+	TNFRSF1A	novel	NONE	NONE	NONE	NONE	0.098626	7.55404	-2.75039	17.1202	2.98277e-17	5.73032e-16
4:76416992:+,4:76419311:+	RCHY1	novel	NONE	NONE	NONE	NONE	1.70979	7.69762	-2.67896	17.1161	3.00272e-17	5.76656e-16
6:160465689:+,6:160467530:+	IGF2R	novel	NONE	NONE	NONE	NONE	0.450422	7.75352	-2.65259	17.1151	3.00796e-17	5.77557e-16
4:48385801:+,4:48422142:+	SLAIN2	core	NM_020846	ENST00000264313	SLAIN2.aAug10	uc003gya.3	1.94744	2.28692	2.14346	17.1101	3.03234e-17	5.81811e-16
20:44437824:+,20:44439696:+	DNTTIP1	novel	NONE	NONE	NONE	NONE	-0.635209	8.07419	-2.48925	17.1092	3.03684e-17	5.82569e-16
12:6687712:+,12:6690210:+	CHD4	novel	NONE	NONE	NONE	NONE	-0.721175	8.25773	-2.4016	17.1088	3.03876e-17	5.82832e-16
2:170799144:+,2:170804052:+	UBR3	novel	NONE	NONE	NONE	NONE	1.10384	7.69754	-2.67977	17.1056	3.05488e-17	5.8571e-16
5:162868970:+,5:162869380:+	CCNG1	novel	NONE	NONE	NONE	NONE	-0.374811	7.61468	-2.72094	17.1054	3.05566e-17	5.85752e-16
6:109315812:+,6:109321694:+	SESN1	novel	NONE	NONE	NONE	NONE	1.80161	7.73752	-2.65762	17.1021	3.0721e-17	5.88262e-16
6:114270424:+,6:114292021:+	HDAC2	novel	NONE	NONE	NONE	NONE	-0.380129	7.68937	-2.6845	17.0986	3.0895e-17	5.91484e-16
2:27354376:+,2:27355471:+	PREB	novel	NONE	NONE	NONE	NONE	-1.37376	7.71327	-2.67184	17.0846	3.16089e-17	6.03835e-16
16:70602398:+,16:70603909:+	SF3B3	novel	NONE	NONE	NONE	NONE	0.257024	8.31579	-2.36915	17.0842	3.16286e-17	6.03991e-16
16:9186127:+,16:9196841:+	C16orf72	novel	NONE	NONE	NONE	NONE	1.43361	7.57095	-2.74281	17.0834	3.16732e-17	6.04733e-16
13:53039600:+,13:53047964:+	CKAP2	novel	NONE	NONE	NONE	NONE	-1.33932	7.72122	-2.66876	17.083	3.16936e-17	6.05012e-16
14:57704084:+,14:57735340:+	EXOC5	novel	NONE	NONE	NONE	NONE	0.057132	7.67289	-2.69114	17.0828	3.17016e-17	6.05037e-16
2:73466924:+,2:73474890:+	CCT7	novel	NONE	NONE	NONE	NONE	0.438096	7.70507	-2.67415	17.0808	3.18041e-17	6.06682e-16
1:75175931:+,1:75188802:+	CRYZ	novel	NONE	NONE	NONE	NONE	0.690535	7.76815	-2.64424	17.0806	3.18188e-17	6.06852e-16
12:93195477:+,12:93196180:+	EEA1	core	NM_003566	ENST00000322349	EEA1.aAug10,EEA1.bAug10,EEA1.cAug10	uc001tck.2	2.39664	2.61403	2.20685	17.0803	3.1833e-17	6.06903e-16
1:24981614:+,1:24987210:+	SRRM1	extended	None	ENST00000447431,ENST00000461768,ENST00000485541,ENST00000496882,ENST00000537199	SRRM1.aAug10,SRRM1.cAug10,SRRM1.dAug10,SRRM1.eAug10,SRRM1.lAug10,SRRM1.nAug10	uc009vrh.1,uc009vri.1,uc010oel.1,uc010oem.1	2.73355	3.08719	1.2166	17.0799	3.18553e-17	6.07219e-16
19:54631575:+,19:54632432:+	PRPF31	novel	NONE	NONE	NONE	NONE	0.0151807	8.08738	-2.48114	17.0792	3.18869e-17	6.07678e-16
17:48275363:+,17:48275794:+	COL1A1	novel	NONE	NONE	NONE	NONE	1.20806	8.89409	-1.14599	17.0792	3.18909e-17	6.07678e-16
5:98210817:+,5:98215256:+	CHD1	novel	NONE	NONE	NONE	NONE	1.79364	7.84351	-2.60781	17.0684	3.24555e-17	6.17653e-16
12:12967158:+,12:12974899:+	DDX47	novel	NONE	NONE	NONE	NONE	1.69437	7.55285	-2.75048	17.0678	3.24856e-17	6.18114e-16
16:2808548:+,16:2809141:+	SRRM2	extended	None	None	SRRM2.uAug10	None	0.62189	7.52542	0.782976	17.0649	3.26409e-17	6.20843e-16
11:107673881:+,11:107677443:+	SLC35F2	novel	NONE	NONE	NONE	NONE	0.373316	7.6475	-2.70526	17.0639	3.26965e-17	6.21677e-16
2:27656957:+,2:27657589:+	NRBP1	novel	NONE	NONE	NONE	NONE	0.14414	7.63901	-2.70651	17.0613	3.28336e-17	6.24058e-16
15:49423013:+,15:49426127:+	COPS2	novel	NONE	NONE	NONE	NONE	0.0739577	7.53467	-2.7602	17.051	3.33905e-17	6.33384e-16
6:111281680:+,6:111283595:+	GTF3C6	novel	NONE	NONE	NONE	NONE	0.934758	7.53442	-2.75982	17.0409	3.39465e-17	6.43351e-16
6:117853556:+,6:117859783:+	DCBLD1	novel	NONE	NONE	NONE	NONE	0.0685269	7.63015	-2.71308	17.0398	3.40062e-17	6.44367e-16
17:26965112:+,17:26966333:+	KIAA0100	novel	NONE	NONE	NONE	NONE	0.339485	8.05307	-2.50056	17.0352	3.42634e-17	6.48773e-16
1:153635609:+,1:153636519:+	ILF2	novel	NONE	NONE	NONE	NONE	-0.0841976	7.90048	-2.57951	17.0347	3.42945e-17	6.49244e-16
5:148885158:+,5:148889442:+	CSNK1A1	novel	NONE	NONE	NONE	NONE	-0.864863	7.59581	-2.72927	17.0312	3.44915e-17	6.52739e-16
1:183835207:+,1:183849750:+	RGL1	core	NM_015149	ENST00000304685,ENST00000360851,ENST00000367531,ENST00000536277,ENST00000539189	RGL1.aAug10,RGL1.bAug10,RGL1.cAug10,RGL1.dAug10,RGL1.eAug10,RGL1.jAug10,RGL1.rAug10	uc001gqm.2,uc001gqo.2,uc010pog.1,uc010poh.1,uc010poi.1	2.33894	2.45249	1.72389	17.0298	3.45653e-17	6.54019e-16
10:18948612:+,10:18955504:+	ARL5B	core	NM_178815	ENST00000377275	ARL5B.aAug10	uc001iqd.1	2.42149	2.58162	2.03593	17.0271	3.47208e-17	6.56725e-16
15:39885869:+,15:39886502:+	THBS1	novel	NONE	NONE	NONE	NONE	1.24077	7.5431	-2.75626	17.0267	3.47445e-17	6.57054e-16
19:57059271:+,19:57060327:+	ZFP28	core	NM_020828	ENST00000301318	ZFP28.aAug10,ZFP28.bAug10	uc002qni.2,uc002qnj.2	2.23719	2.51554	1.91109	17.0256	3.48056e-17	6.57974e-16
14:103342862:+,14:103369592:+	TRAF3	novel	NONE	NONE	NONE	NONE	0.546608	7.96181	-2.54797	17.0231	3.4947e-17	6.60432e-16
2:11338711:+,2:11341083:+	ROCK2	novel	NONE	NONE	NONE	NONE	-0.65688	8.07969	-2.48967	17.0231	3.49482e-17	6.60432e-16
10:51565296:+,10:51580556:+	NCOA4	extended	None	ENST00000430396,ENST00000498586	MSMBandNCOA4.fAug10,MSMBandNCOA4.veAug10,MSMBandNCOA4.viAug10,MSMBandNCOA4.vpAug10	uc010qhe.1	-0.0316116	4.57231	0.832835	17.0215	3.504e-17	6.6193e-16
7:143001026:+,7:143002033:+	CASP2	novel	NONE	NONE	NONE	NONE	1.65786	8.82221	-1.18186	17.02	3.51238e-17	6.63273e-16
4:160271441:+,4:160273837:+	RAPGEF2	core	NM_014247	ENST00000264431	RAPGEF2.aAug10,RAPGEF2.bAug10,RAPGEF2.cAug10	uc003iqg.3	1.93943	3.35944	1.12758	17.0179	3.52463e-17	6.65322e-16
9:134322593:+,9:134330463:+	PRRC2B	novel	NONE	NONE	NONE	NONE	-0.209891	7.70391	-2.67746	17.0158	3.53689e-17	6.67423e-16
9:74974437:+,9:74975544:+	ZFAND5	novel	NONE	NONE	NONE	NONE	1.65978	8.10427	-2.47728	17.0154	3.5389e-17	6.67683e-16
10:51580696:+,10:51581270:+	NCOA4	extended	None	ENST00000430396	MSMBandNCOA4.fAug10,MSMBandNCOA4.pAug10,MSMBandNCOA4.uAug10,MSMBandNCOA4.vaAug10,MSMBandNCOA4.vbAug10	uc010qhe.1	-0.0316116	7.57455	-0.748373	17.0144	3.54514e-17	6.6874e-16
8:42841938:+,8:42862990:+	HOOK3	novel	NONE	NONE	NONE	NONE	1.34934	7.74304	-2.65673	17.0058	3.59503e-17	6.77543e-16
14:104379031:+,14:104381403:+	C14orf2	novel	NONE	NONE	NONE	NONE	0.818582	7.52465	-2.76521	17.0057	3.59608e-17	6.77619e-16
12:93245042:+,12:93245951:+	EEA1	core	NM_003566	ENST00000322349,ENST00000418984,ENST00000540777	EEA1.aAug10,EEA1.bAug10,EEA1.cAug10	uc001tck.2	2.39664	2.43368	1.7124	17.0006	3.62592e-17	6.82754e-16
18:45375058:+,18:45391430:+	SMAD2	novel	NONE	NONE	NONE	NONE	1.47364	7.56898	-2.74254	16.9981	3.64084e-17	6.85318e-16
7:152012423:+,7:152027686:+	MLL3	core	NM_170606	ENST00000262189,ENST00000355193,ENST00000452749,ENST00000558084	MLL3.aAug10,MLL3.hAug10	uc003wla.2	1.57311	3.62467	1.08684	16.9972	3.64616e-17	6.86196e-16
10:21962848:+,10:22002701:+	MLLT10	novel	NONE	NONE	NONE	NONE	0.378473	7.60372	-2.72608	16.9945	3.66204e-17	6.89062e-16
2:38973889:+,2:38975721:+	SRSF7	novel	NONE	NONE	NONE	NONE	0.857893	10.0267	0.573995	16.9931	3.67097e-17	6.90619e-16	Figure 5A
12:69237574:+,12:69237672:+	MDM2	novel	NONE	NONE	NONE	NONE	2.96722	7.64578	-2.70619	16.9929	3.67196e-17	6.90682e-16
19:15376454:+,19:15378227:+	BRD4	core	NM_014299,NM_058243	ENST00000263377,ENST00000360016,ENST00000371835	BRD4.aAug10,BRD4.bAug10,BRD4.cAug10,BRD4.dAug10,BRD4.nAug10	uc002nar.2,uc002nas.2,uc002nat.3,uc002nau.3	1.37067	2.05222	2.50464	16.9809	3.74472e-17	7.0399e-16
20:34313077:+,20:34317384:+	RBM39	novel	NONE	NONE	NONE	NONE	0.714398	7.71102	-2.67094	16.979	3.7565e-17	7.05842e-16
16:84733717:+,16:84778239:+	USP10	novel	NONE	NONE	NONE	NONE	-0.106462	7.65378	-2.70003	16.9767	3.77091e-17	7.08282e-16
7:127447627:+,7:127527955:+	SND1	novel	NONE	NONE	NONE	NONE	-0.29309	7.63706	-2.70994	16.9721	3.79919e-17	7.13465e-16
19:39973796:+,19:39976827:+	TIMM50	novel	NONE	NONE	NONE	NONE	0.129469	7.8335	-2.61186	16.9704	3.80974e-17	7.1519e-16
2:232026223:+,2:232030585:+	PSMD1	novel	NONE	NONE	NONE	NONE	0.543293	7.53284	-2.76187	16.9684	3.82204e-17	7.17115e-16
2:189949939:+,2:189953421:+	COL5A2	novel	NONE	NONE	NONE	NONE	1.2239	8.31485	-1.4339	16.9665	3.83426e-17	7.19281e-16
6:160454139:+,6:160461592:+	IGF2R	novel	NONE	NONE	NONE	NONE	0.450422	7.55068	-2.75267	16.966	3.83757e-17	7.19773e-16
2:225379489:+,2:225449661:+	CUL3	novel	NONE	NONE	NONE	NONE	1.32332	7.55941	-2.74745	16.9653	3.8419e-17	7.20457e-16
10:70098399:+,10:70099197:+	HNRNPH3	novel	NONE	NONE	NONE	NONE	0.769172	8.00165	-2.52907	16.9599	3.87595e-17	7.26583e-16
20:5564968:+,20:5579371:+	GPCPD1	novel	NONE	NONE	NONE	NONE	0.160293	7.66961	-2.69285	16.9524	3.92377e-17	7.34763e-16
7:92191682:+,7:92199137:+	FAM133B,LOC728066	core	NR_034169	ENST00000481407	FAM133B.fAug10	None	2.22675	6.2062	0.253383	16.9516	3.92889e-17	7.35468e-16
12:51158090:+,12:51189692:+	ATF1	novel	NONE	NONE	NONE	NONE	1.70665	7.61141	-2.72329	16.9493	3.94386e-17	7.37475e-16
2:27558573:+,2:27560111:+	GTF3C2	novel	NONE	NONE	NONE	NONE	-0.24168	7.53233	-2.76112	16.9486	3.94825e-17	7.37975e-16
21:38862763:+,21:38865319:+	DYRK1A	core	NM_001396,NM_101395,NM_130436,NM_130438	ENST00000321219,ENST00000338785,ENST00000339659,ENST00000398956,ENST00000398960,ENST00000451934,ENST00000455387	DYRK1A.aAug10,DYRK1A.bAug10,DYRK1A.cAug10,DYRK1A.dAug10,DYRK1A.eAug10	uc002ywi.2,uc002ywj.2,uc002ywk.2,uc002ywl.2,uc002ywm.2,uc011aei.1	2.34915	2.34566	1.90189	16.9465	3.96214e-17	7.39841e-16
13:49720071:+,13:49742749:+	FNDC3A	novel	NONE	NONE	NONE	NONE	0.605671	7.52332	-2.76624	16.9461	3.96507e-17	7.40125e-16
12:76752591:+,12:76763417:+	OSBPL8	novel	NONE	NONE	NONE	NONE	0.743474	7.66161	-2.69854	16.9455	3.96874e-17	7.40678e-16
7:84647609:+,7:84651707:+	SEMA3D	novel	NONE	NONE	NONE	NONE	-0.848227	7.52309	-2.7651	16.94	4.00448e-17	7.46455e-16
13:29002058:+,13:29004187:+	FLT1	core	NM_001159920,NM_001160030,NM_001160031,NM_002019	ENST00000282397,ENST00000450836,ENST00000539099,ENST00000541932	FLT1.aAug10,FLT1.bAug10,FLT1.cAug10,FLT1.dAug10	uc001usb.3,uc001usc.3,uc010aar.1,uc010tdp.1	1.25857	2.44304	2.07333	16.9358	4.03209e-17	7.50903e-16
6:11188540:+,6:11190197:+	NEDD9	core	NM_001142393,NM_006403	ENST00000379446,ENST00000448183,ENST00000504387	NEDD9.aAug10,NEDD9.bAug10,NEDD9.cAug10,NEDD9.dAug10,NEDD9.eAug10	uc003mzv.2,uc003mzw.3,uc010joz.2	1.86911	2.02597	2.29258	16.9329	4.0517e-17	7.54288e-16
11:72600990:+,11:72632873:+	FCHSD2	novel	NONE	NONE	NONE	NONE	0.513371	7.82481	-2.6169	16.9303	4.0689e-17	7.56821e-16
6:75847295:+,6:75848538:+	COL12A1	novel	NONE	NONE	NONE	NONE	1.04402	7.48632	-2.78426	16.93	4.07118e-17	7.57111e-16
21:46271542:+,21:46281078:+	PTTG1IP	extended	None	ENST00000397887	PTTG1IP.mAug10,PTTG1IP.sAug10	None	0.31731	4.31867	0.752467	16.9284	4.08181e-17	7.58821e-16
16:14755922:+,16:14761492:+	BFAR	novel	NONE	NONE	NONE	NONE	0.0959101	7.60216	-2.72798	16.9279	4.08508e-17	7.59293e-16
13:41941788:+,13:41943226:+	NAA16	core	NM_024561	ENST00000379406,ENST00000463114,ENST00000464857,ENST00000497143,ENST00000497727	NAA16.aAug10,NAA16.bAug10,NAA16.cAug10,NAA16.eAug10	uc001uyf.2,uc010tfg.1	1.4621	2.00908	2.32015	16.923	4.1182e-17	7.64775e-16
20:30149539:+,20:30156923:+	HM13	extended	None	ENST00000469097	HM13andPSIMCT-1.nAug10,HM13andPSIMCT-1.vdAug10	None	-0.15738	2.23918	2.83722	16.9225	4.12115e-17	7.65188e-16
2:36726490:+,2:36739416:+	CRIM1	novel	NONE	NONE	NONE	NONE	0.717236	8.72879	-2.16596	16.9172	4.1572e-17	7.71472e-16
7:106826387:+,7:106840605:+	HBP1	novel	NONE	NONE	NONE	NONE	0.356769	7.54948	-2.75309	16.9164	4.16317e-17	7.72312e-16
12:6604391:+,12:6619795:+	NCAPD2	novel	NONE	NONE	NONE	NONE	-0.961152	7.57599	-2.73828	16.9143	4.17722e-17	7.74505e-16
12:104680887:+,12:104705068:+	TXNRD1	core	NM_182743	ENST00000526580	TXNRD1.hAug10	uc001tkp.1,uc010swn.1	1.07993	2.85912	1.37981	16.9136	4.18204e-17	7.75149e-16
19:34699956:+,19:34710296:+	LSM14A	novel	NONE	NONE	NONE	NONE	0.205566	7.55832	-2.74788	16.9127	4.18868e-17	7.76181e-16
7:149174138:+,7:149174655:+	ZNF746	core	NM_001163474,NM_152557	ENST00000340622,ENST00000458143,ENST00000471735	ZNF746.aAug10,ZNF746.bAug10,ZNF746.cAug10,ZNF746.dAug10	uc003wfw.2,uc010lpi.2	2.34303	2.48102	1.87696	16.9084	4.21799e-17	7.80825e-16
20:45905539:+,20:45923410:+	ZMYND8	novel	NONE	NONE	NONE	NONE	-0.540643	7.69362	-2.68015	16.9051	4.24115e-17	7.84975e-16
1:76255041:+,1:76257146:+	RABGGTB	novel	NONE	NONE	NONE	NONE	-0.622714	8.11512	-2.46934	16.9025	4.25934e-17	7.88063e-16
8:95953319:+,8:95961382:+	TP53INP1	core	NM_001135733,NM_033285	ENST00000342697,ENST00000448464	TP53INP1.aAug10,TP53INP1.bAug10,TP53INP1.cAug10,TP53INP1.eAug10	uc003yhg.2,uc003yhh.2	3.64076	3.59174	1.08514	16.8949	4.31261e-17	7.97359e-16
6:76421132:+,6:76423391:+	SENP6	novel	NONE	NONE	NONE	NONE	-0.221108	7.88322	-2.58844	16.8842	4.38923e-17	8.10528e-16
20:17932239:+,20:17934640:+	SNX5	extended	None	ENST00000476648	None	None	-0.330517	7.59249	-2.73228	16.8827	4.40016e-17	8.12119e-16
8:124373886:+,8:124382061:+	ATAD2	novel	NONE	NONE	NONE	NONE	-1.05414	7.72444	-2.66687	16.8811	4.41196e-17	8.14011e-16
4:85594144:+,4:85599321:+	WDFY3	novel	NONE	NONE	NONE	NONE	0.635359	7.48515	-2.78536	16.8787	4.42966e-17	8.16848e-16
2:128081817:+,2:128083304:+	MAP3K2	core	NM_006609	ENST00000344908,ENST00000409947	MAP3K2.aAug10,MAP3K2.bAug10	uc002toj.1,uc010flz.1	2.72744	3.07394	1.21701	16.8774	4.43878e-17	8.18099e-16
11:62621062:+,11:62621991:+	SNHG1	novel	NONE	NONE	NONE	NONE	-0.152273	7.65984	-2.69884	16.8762	4.44744e-17	8.19408e-16
2:56420575:+,2:56611401:+	CCDC85A	extended	None	None	CCDC85A.cAug10	None	-0.710756	2.50059	1.67789	16.8758	4.4508e-17	8.19884e-16
12:58220185:+,12:58221335:+	CTDSP2	novel	NONE	NONE	NONE	NONE	0.747755	5.24906	0.564501	16.8707	4.48837e-17	8.25938e-16
15:78832881:+,15:78834825:+	PSMA4	novel	NONE	NONE	NONE	NONE	0.157897	7.75582	-2.65078	16.8702	4.49167e-17	8.264e-16
12:42491835:+,12:42503368:+	GXYLT1	novel	NONE	NONE	NONE	NONE	1.34208	7.49416	-2.78008	16.8696	4.49651e-17	8.26919e-16
17:73035158:+,17:73038276:+	ATP5H	novel	NONE	NONE	NONE	NONE	1.08362	7.58369	-2.7372	16.8631	4.54466e-17	8.35418e-16
9:82319817:+,9:82321662:+	TLE4	novel	NONE	NONE	NONE	NONE	0.699885	7.56573	-2.74333	16.8615	4.55629e-17	8.37119e-16
12:70149439:+,12:70188217:+	RAB3IP	novel	NONE	NONE	NONE	NONE	-1.91443	7.5923	-2.73268	16.8596	4.57122e-17	8.39568e-16
1:95367341:+,1:95368678:+	CNN3	extended	None	ENST00000394202	CNN3.aAug10	uc010otx.1	0.961316	7.93606	-0.104599	16.8557	4.60018e-17	8.44444e-16
17:2541614:+,17:2570286:+	PAFAH1B1	extended	None	None	PAFAH1B1.jAug10	uc010ckb.1	0.882041	7.59283	-0.901593	16.8492	4.65012e-17	8.53165e-16
[truncated: 13,532 more rows]

## Sheet: S6B Hela SSA
Table S6B Differentially spliced exon junctions in spliceostatin treated Hela cells
[truncated: 15,026 more rows]

[truncated: 1 more sheets: S6C]
