# Supplementary material
Source: HighWire-hosted journal article supplement (doi:10.1101/rna.065383.117)
Supplement: Supplemental_Table_S7_Primers_used_in_the_RT-PCR.xlsx [file Supplemental_Table_S7_Primers_used_in_the_RT-PCR.xlsx]

## Sheet: Sheet1
Supplementary Table 5 Primers used in the RT-PCR
Gene	OrientationID	PrimerSequence	Annnealing temperature (C)
HERPUD1	F1	GTCGTTGCAGAGATTGCGGG	58
HERPUD1	R1	GCATATATCTGCTGGAACCAGG
HNRNPR	F4	GAGCAATTGATGCTCTCAGG	58
HNRNPR	R6	TCTGTCACCGTAGTAGCCAAG
RAC1	F2	ATGCAGGCCATCAAGTGTGTG	58
RAC1	R1	GTTCCAAGGGACAGGACCAAG
RAN	F1	TCCGCCATCTTTCCAGCCTCA	58
RAN	R3	GAATTTCTCCTGGCCGGCTG
RAP1B	F1	AGGAGGCGTTGGAAAGTCTG	58
RAP1B	R1	GGCACTGTTGAATTGGGCAAC
RBM39	F2	GAAGCAATGCTTGAGGCTCC	58
RBM39	R1	GCTCAAAGATCCCACGAAGC
MDM2	F1	CTGGGGAGTCTTGAGGGACC	58
MDM2	R1	CAGGTTGTCTAAATTCCTAG
SMEK1	F2	GGATCCCGCTACAATCTGATG	58
SMEK1	R6	CTACAGCTTCTCCATCTTCC
SRSF7	F4	GAACTATCGACAGGCATGCC	58
SRSF7	R1	CTTCTGCGAGGACTTCCTGAT
UBQ	F1	ACCTGACCAGCAGCGTCTGATATT	58
UBQ	R1	TCGCAGTTGTATTTCTGGGCAAGC
VDAC3	F3	GACTTCCAGCTGCACACACA	58
VDAC3	R3	CCAGGGACAAATCTGATGC
